# Supplementary material for: Heat shock factor 1 (HSF1) cooperates with estrogen receptor α (ERα) in the regulation of estrogen action in breast cancer cells
Source: eLife journal article supplement (doi:10.7554/elife.69843), 2021-11-16

**Blots for Figure 1-figure supplement 1A with relevant bands labeled.**

HSF1 left


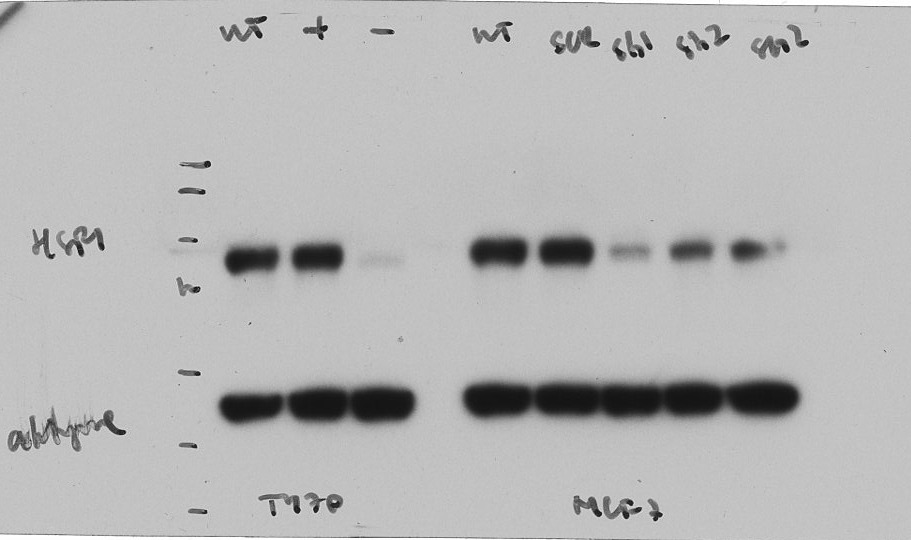


ACTB left


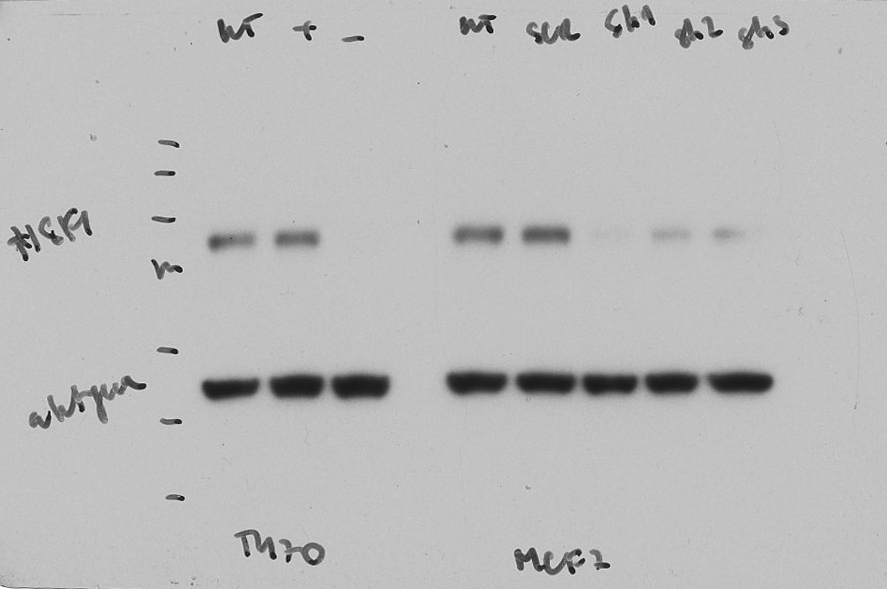


**
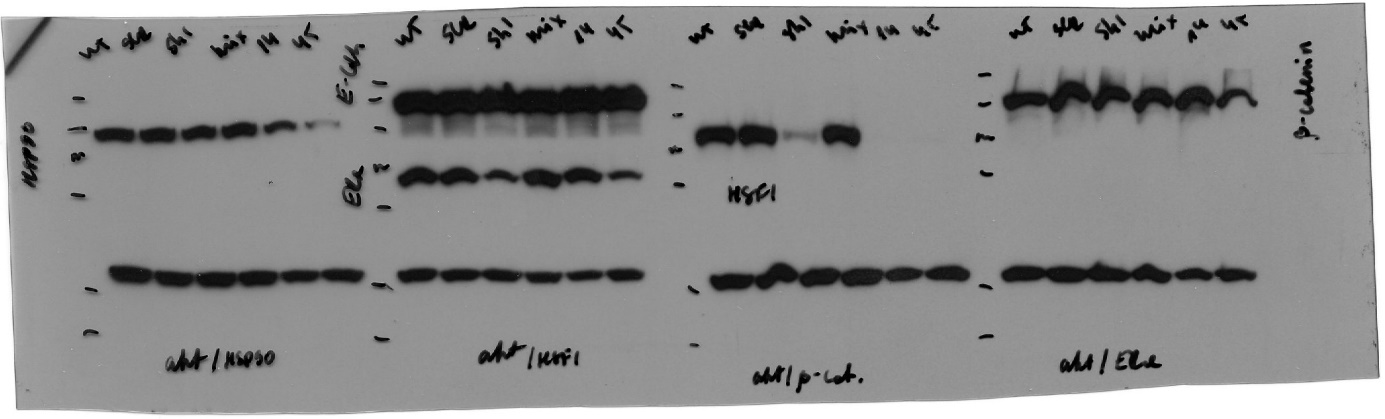
**HSF1 and ACTB right

**Blots for Figure 1-figure supplement 2A with relevant bands labeled.**

HSF1


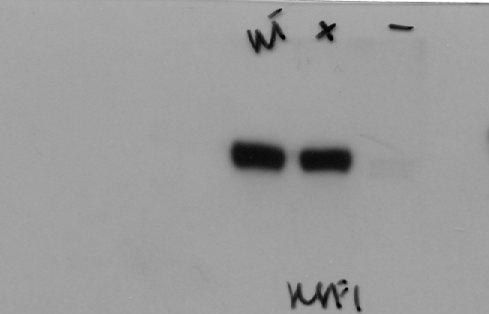


ACTB


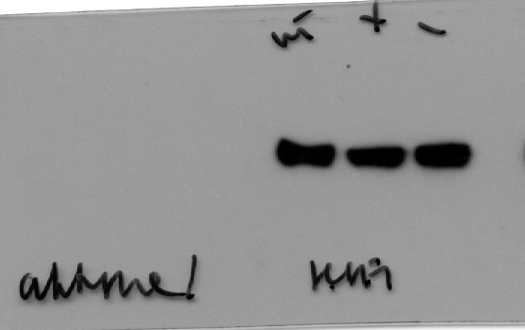


**Blots for Figure 3-figure supplement 2B with relevant bands labeled.**

**
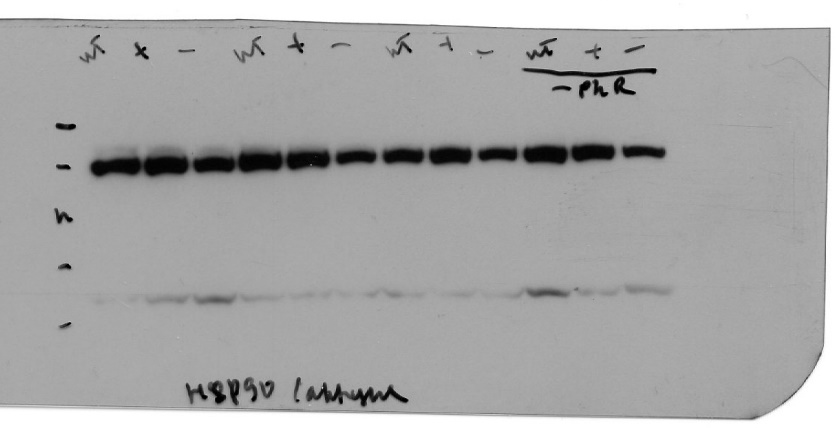
** MCF7 left (WT, HSF1+ and HSF1−),HSP90

**
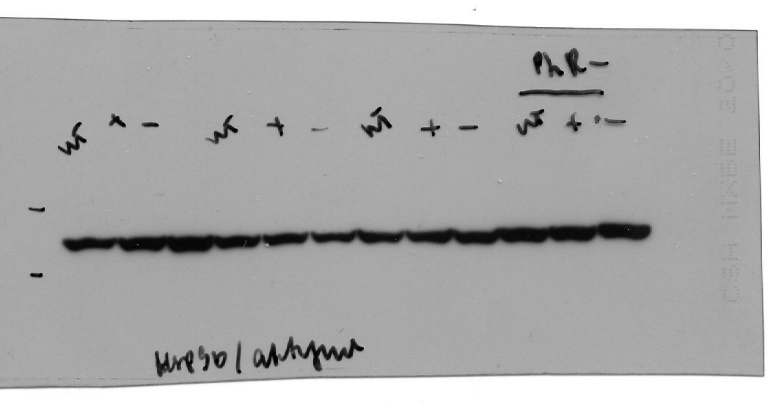
** MCF7 left,ACTB to HSP90

MCF7 right, HSP90 and ACTB


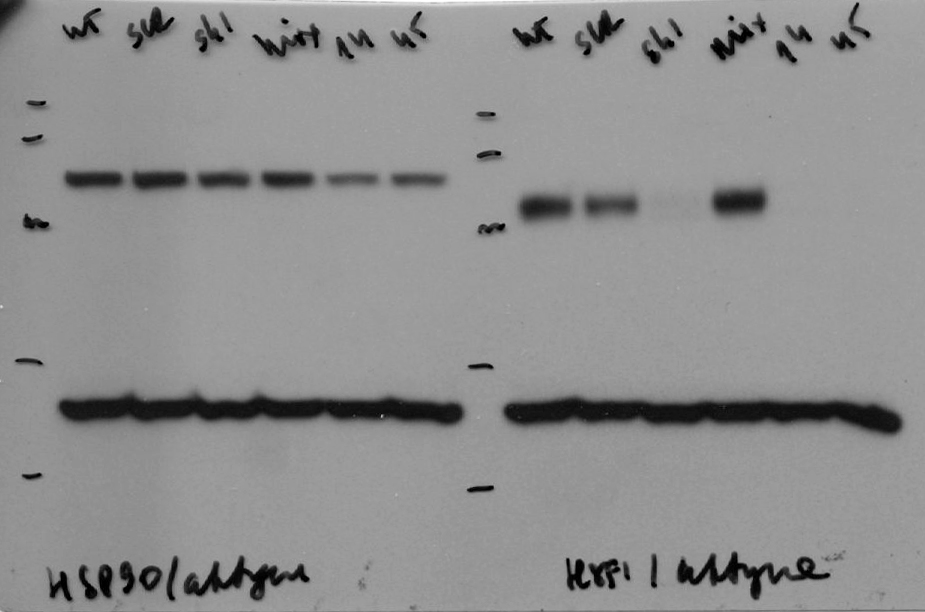


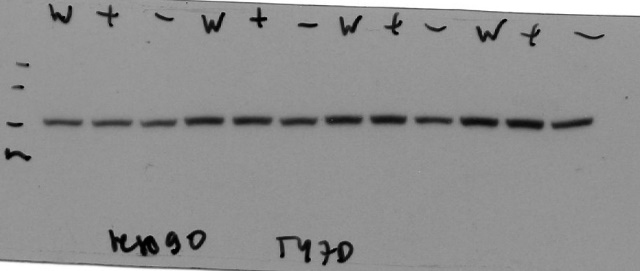
 T47D, HSP90


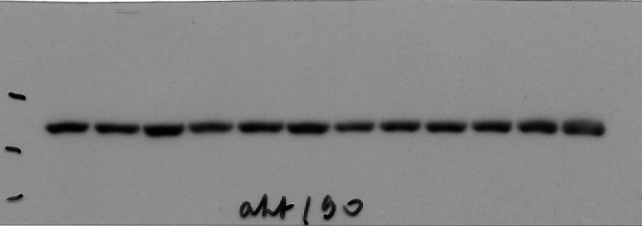
 T47D, ACTB to HSP90

**Blots for Figure 3-figure supplement 2C with relevant bands labeled.**

MCF7,ERα, and ACTB


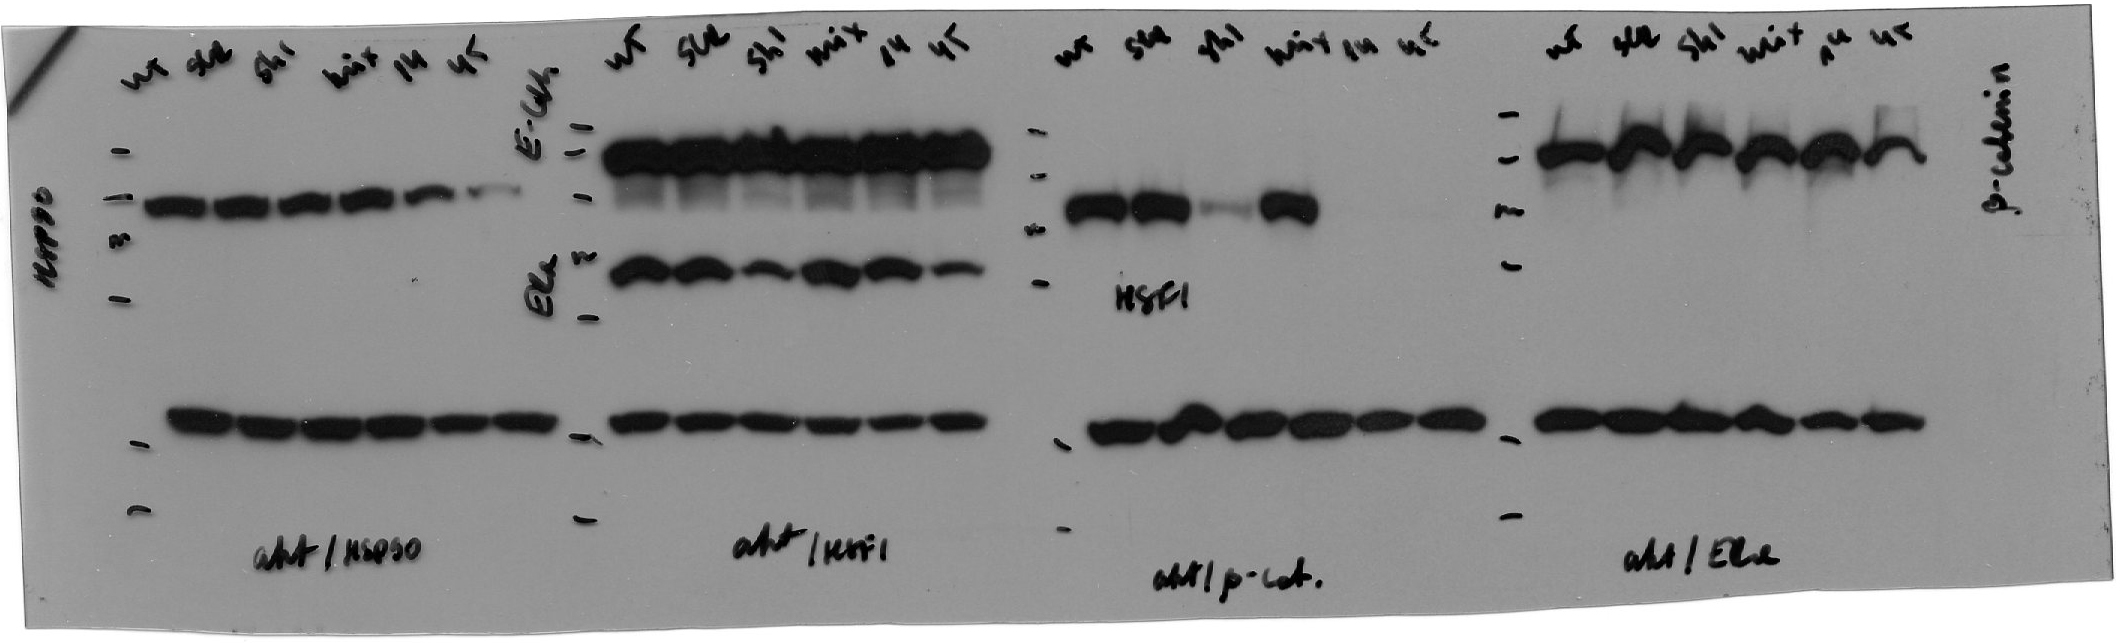


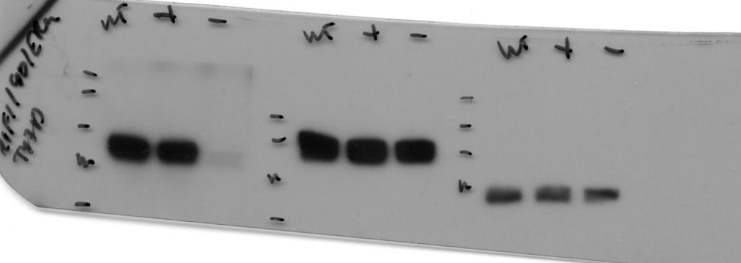
 T47D, ERα T47D, ACTB to ERα


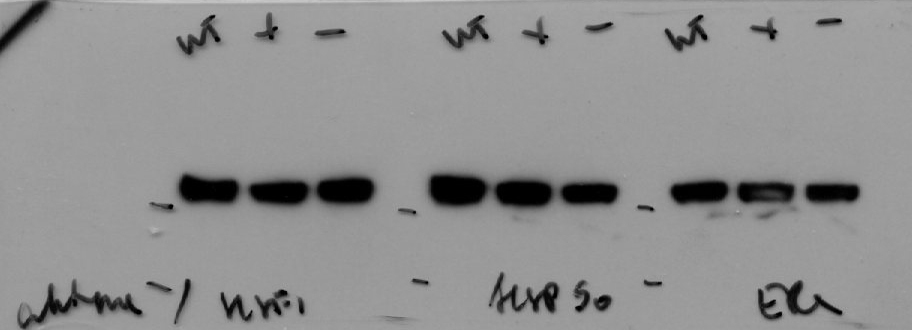

Supplement: supp9 [file unprocessed blots_suppl_rev.docx]
