# Supplementary material for: Heat shock factor 1 (HSF1) cooperates with estrogen receptor α (ERα) in the regulation of estrogen action in breast cancer cells
Source: eLife. 2021 Nov 16;10:e69843. doi: 10.7554/eLife.69843 (PMC8709578; doi:10.7554/eLife.69843)
Supplement: Supplementary file 1. [file elife-69843-supp1.xlsx]

## Sheet: WT, SCR, shHSF1, MIX, KO#1#2
EnsemblGene	Gene.refGene	GeneType	Chr	Start	End	Length	WT_Ctr	WT_E2	SCR_Ctr	SCR_E2	shHSF1_Ctr	shHSF1_E2	MIX_Ctr	MIX_E2	HSF1_KO#1_Ctr	HSF1_KO#1_E2	HSF1_KO#2_Ctr	HSF1_KO#2_E2	folds WT E2 vs Ctr	folds SCR E2 vs Ctr	folds shHSF1 E2 vs Ctr	folds MIX E2 vs Ctr	folds HSF1_KO#1 E2 vs Ctr	folds HSF1_KO#2 E2 vs Ctr
ENSG00000223972.5	DDX11L1	gene_type transcribed_unprocessed_pseudogene	chr1;chr1;chr1;chr1;chr1;chr1;chr1;chr1;chr1	11869;12010;12179;12613;12613;12975;13221;13221;13453	12227;12057;12227;12721;12697;13052;13374;14409;13670	1735	3.55782624462725	3.55782624462725	3.55782624462725	3.55782624462725	3.55782624462725	3.55782624462725	3.55782624462725	3.55782624462725	3.55782624462725	3.97475709050258	3.55782624462725	3.55782624462725	1	1	1	1	1.33508430584895	1
ENSG00000227232.5	WASH7P	gene_type unprocessed_pseudogene	chr1;chr1;chr1;chr1;chr1;chr1;chr1;chr1;chr1;chr1;chr1	14404;15005;15796;16607;16858;17233;17606;17915;18268;24738;29534	14501;15038;15947;16765;17055;17368;17742;18061;18366;24891;29570	1351	4.65072872024457	4.93880604644348	5.07058718129306	5.26356097242997	4.95403865708526	5.06791939041892	4.72160454055041	4.50552303053715	4.92398302613155	5.05515843685455	4.71204617723002	4.98112808775494	1.22101195524737	1.14311756866629	1.08213518141198	0.860900547430477	1.09518562133333	1.20504073050464
ENSG00000278267.1	MIR6859-1	gene_type miRNA	chr1	17369	17436	68	3.55782624462725	4.24046069271801	3.55782624462725	3.55782624462725	3.99376167689582	3.9399101021215	4.28233509801111	4.11146652358321	4.36577948478197	4.38328681413529	3.97541602041241	4.40124077151475	1.60506803171848	1	0.963361000009112	0.888307714559669	1.01220908573275	1.34334023586622
ENSG00000243485.5	MIR1302-2HG	gene_type lincRNA	chr1;chr1;chr1;chr1;chr1	29554;30267;30564;30976;30976	30039;30667;30667;31097;31109	1021	3.55782624462725	3.55782624462725	3.55782624462725	3.55782624462725	3.55782624462725	3.55782624462725	3.55782624462725	3.55782624462725	3.55782624462725	3.55782624462725	3.55782624462725	3.55782624462725	1	1	1	1	1	1
ENSG00000284332.1	MIR1302-2	gene_type miRNA	chr1	30366	30503	138	3.55782624462725	3.55782624462725	3.55782624462725	3.55782624462725	3.55782624462725	3.55782624462725	3.55782624462725	3.55782624462725	3.55782624462725	3.55782624462725	3.55782624462725	3.55782624462725	1	1	1	1	1	1
ENSG00000237613.2	FAM138A	gene_type lincRNA	chr1;chr1;chr1;chr1;chr1	34554;35245;35277;35721;35721	35174;35481;35481;36073;36081	1219	3.55782624462725	3.55782624462725	3.55782624462725	3.55782624462725	3.55782624462725	3.55782624462725	3.55782624462725	3.55782624462725	3.55782624462725	3.55782624462725	3.55782624462725	3.55782624462725	1	1	1	1	1	1
ENSG00000268020.3	OR4G4P	gene_type unprocessed_pseudogene	chr1	52473	53312	840	3.55782624462725	3.55782624462725	3.55782624462725	3.55782624462725	3.55782624462725	3.55782624462725	3.55782624462725	3.55782624462725	3.55782624462725	3.55782624462725	3.55782624462725	3.55782624462725	1	1	1	1	1	1
ENSG00000240361.1	OR4G11P	gene_type unprocessed_pseudogene	chr1	62948	63887	940	3.55782624462725	3.55782624462725	3.55782624462725	3.55782624462725	3.55782624462725	3.55782624462725	3.55782624462725	3.55782624462725	3.55782624462725	3.55782624462725	3.55782624462725	3.55782624462725	1	1	1	1	1	1
ENSG00000186092.4	OR4F5	gene_type protein_coding	chr1	69091	70008	918	3.55782624462725	3.55782624462725	3.55782624462725	3.55782624462725	3.55782624462725	3.55782624462725	3.55782624462725	3.55782624462725	3.55782624462725	3.55782624462725	3.55782624462725	3.55782624462725	1	1	1	1	1	1
ENSG00000238009.6	RP11-34P13.7	gene_type lincRNA	chr1;chr1;chr1;chr1;chr1;chr1;chr1;chr1;chr1;chr1;chr1;chr1;chr1;chr1;chr1;chr1;chr1	89295;92091;92230;110953;112700;112700;112700;120721;120725;120775;120874;129055;129055;129055;129081;133374;133374	91629;92240;92240;111357;112804;112804;112804;120932;120869;120932;120932;129223;129217;129173;129223;133566;133723	3726	3.95230142254003	3.95438272415751	3.96520609223261	3.55782624462725	3.55782624462725	3.55782624462725	3.55782624462725	3.95050242154829	3.55782624462725	3.55782624462725	3.55782624462725	3.55782624462725	1.00144368946577	0.753991493562934	1	1.31282641920024	1	1
ENSG00000239945.1	RP11-34P13.8	gene_type lincRNA	chr1;chr1	89551;90287	90050;91105	1319	3.55782624462725	3.55782624462725	3.55782624462725	3.55782624462725	3.55782624462725	3.55782624462725	3.55782624462725	3.55782624462725	3.55782624462725	3.55782624462725	3.55782624462725	3.55782624462725	1	1	1	1	1	1
ENSG00000233750.3	CICP27	gene_type processed_pseudogene	chr1	131025	134836	3812	3.55782624462725	4.24046069271801	4.25885812962813	3.55782624462725	3.55782624462725	3.9399101021215	4.4868859099821	3.95050242154829	3.55782624462725	3.97475709050258	4.27619612797294	4.29078246946898	1.60506803171848	0.615132077192249	1.30322289775605	0.689497158605302	1.33508430584895	1.01016176508884
ENSG00000268903.1	RP11-34P13.15	gene_type processed_pseudogene	chr1	135141	135895	755	4.98011786242065	5.92275158978681	5.24215785161165	5.61386528322094	5.389325411389	5.58755969182253	5.51724138668303	5.76445255490987	5.67724931999646	5.49977873281882	5.00702687300706	5.50266388551549	1.92203382726024	1.29388323747026	1.14729331900458	1.18691051381928	0.884251957521253	1.40994316885527
ENSG00000269981.1	RP11-34P13.16	gene_type processed_pseudogene	chr1	137682	137965	284	4.2369208620727	5.23995351629677	4.53994339918289	4.60791311011023	4.68658471014338	5.10796161153328	4.90976689934899	4.87596962436536	5.07242701478558	4.71030396550859	4.89885243935514	4.58380936888272	2.0042085732702	1.04824046770233	1.33920507611119	0.976845784001648	0.778018815520825	0.803826992791993
ENSG00000239906.1	RP11-34P13.14	gene_type antisense	chr1;chr1	139790;140075	139847;140339	323	3.55782624462725	3.95438272415751	3.55782624462725	3.55782624462725	3.55782624462725	4.09661836972613	3.55782624462725	3.55782624462725	3.55782624462725	3.55782624462725	3.55782624462725	3.55782624462725	1.3163621772543	1	1.45275570996825	1	1	1
ENSG00000241860.6	RP11-34P13.13	gene_type processed_transcript	chr1;chr1;chr1;chr1;chr1;chr1;chr1;chr1;chr1;chr1;chr1;chr1;chr1;chr1;chr1;chr1	141474;142808;146386;146386;146386;146642;155767;164263;165884;165889;168100;168100;168610;169049;172557;173753	143011;143011;146509;146509;149707;146831;155831;164791;165942;165942;168165;168165;168767;169264;172688;173862	6195	3.55782624462725	3.95438272415751	3.55782624462725	3.55782624462725	3.55782624462725	3.55782624462725	3.55782624462725	3.95050242154829	3.55782624462725	3.55782624462725	3.55782624462725	3.55782624462725	1.3163621772543	1	1	1.31282641920024	1	1
ENSG00000222623.1	RNU6-1100P	gene_type snRNA	chr1	157784	157887	104	3.55782624462725	3.55782624462725	3.55782624462725	3.55782624462725	3.55782624462725	3.55782624462725	3.55782624462725	3.55782624462725	3.55782624462725	3.55782624462725	3.55782624462725	3.55782624462725	1	1	1	1	1	1
ENSG00000241599.1	RP11-34P13.9	gene_type lincRNA	chr1;chr1	160446;161314	160690;161525	457	3.55782624462725	3.55782624462725	3.55782624462725	3.55782624462725	3.55782624462725	3.55782624462725	3.55782624462725	3.55782624462725	3.55782624462725	3.55782624462725	3.55782624462725	3.55782624462725	1	1	1	1	1	1
ENSG00000279928.2	ABC7-43046700E7.1	gene_type unprocessed_pseudogene	chr1;chr1;chr1;chr1;chr1	182696;183132;183494;183740;183981	182746;183216;183571;183901;184174	570	3.55782624462725	3.55782624462725	3.55782624462725	3.55782624462725	3.55782624462725	3.55782624462725	3.55782624462725	3.55782624462725	3.55782624462725	3.55782624462725	3.55782624462725	3.55782624462725	1	1	1	1	1	1
ENSG00000279457.4	RP11-34P13.18	gene_type unprocessed_pseudogene	chr1;chr1;chr1;chr1;chr1;chr1;chr1;chr1;chr1;chr1	185217;185491;186317;187129;187376;187755;188130;188439;188791;195263	185350;185559;186469;187287;187577;187890;188266;188584;188902;195411	1397	6.01847264031466	6.08905758517401	5.95327066375507	6.16183512123717	6.47851180808274	6.19317122753041	6.34869742726476	6.34951991362711	6.06553880675826	6.32658419128104	6.19626237950972	5.75798672187101	1.05014238056986	1.1555378027274	0.820547877196665	1.00057026664334	1.1983467185221	0.738016175647494
ENSG00000273874.1	MIR6859-2	gene_type miRNA	chr1	187891	187958	68	3.55782624462725	3.55782624462725	3.55782624462725	3.55782624462725	3.55782624462725	3.55782624462725	3.55782624462725	3.55782624462725	3.55782624462725	3.55782624462725	3.55782624462725	3.55782624462725	1	1	1	1	1	1
ENSG00000228463.9	AP006222.2	gene_type lincRNA	chr1;chr1;chr1;chr1;chr1;chr1;chr1;chr1;chr1;chr1;chr1;chr1;chr1;chr1	257864;258144;258501;261550;264604;266361;267303;267303;268667;268667;287517;289266;289266;297345	259025;259025;259025;261634;264733;268204;268204;267911;268816;268807;287921;289370;289370;297502	4039	4.65072872024457	4.24046069271801	4.36473673247505	4.51980079659829	4.17203110618318	4.48066070093918	4.39158453445309	4.11146652358321	4.81218729988587	4.27507766239493	4.56377988186717	4.29078246946898	0.752483562422932	1.11347106177809	1.23853066996855	0.823523651182161	0.689150202584815	0.827598300448
ENSG00000241670.3	RPL23AP21	gene_type processed_pseudogene	chr1	258568	259024	457	3.55782624462725	3.55782624462725	3.55782624462725	3.55782624462725	3.55782624462725	3.55782624462725	3.55782624462725	3.55782624462725	3.55782624462725	3.55782624462725	3.55782624462725	3.55782624462725	1	1	1	1	1	1
ENSG00000236679.2	RPL23AP24	gene_type processed_pseudogene	chr1	347982	348366	385	3.95230142254003	3.95438272415751	3.96520609223261	4.17289735623919	4.17203110618318	3.9399101021215	4.1514250525846	4.23386063257747	4.13281753800557	4.38328681413529	4.38456570337338	3.55782624462725	1.00144368946577	1.15483862323957	0.851382296235457	1.05880402183728	1.18959400015142	0.563802015822352
ENSG00000236743.1	RP5-857K21.15	gene_type lincRNA	chr1;chr1;chr1	357383;358049;359345	357586;358183;359681	676	3.55782624462725	3.55782624462725	4.25885812962813	3.55782624462725	3.99376167689582	3.55782624462725	3.55782624462725	3.55782624462725	3.55782624462725	3.55782624462725	3.97541602041241	4.15839371305164	1	0.615132077192249	0.73921429838892	1	1	1.13522454884573
ENSG00000236601.2	RP4-669L17.2	gene_type lincRNA	chr1;chr1;chr1;chr1;chr1;chr1	358857;358872;360057;365171;365171;365171	358929;358957;360168;365510;365704;366052	1095	4.11398763489342	4.34368653389374	4.36473673247505	4.51980079659829	3.55782624462725	4.09661836972613	4.1514250525846	4.11146652358321	3.96574265195466	4.27507766239493	4.27619612797294	3.9840131269933	1.17259019554756	1.11347106177809	1.45275570996825	0.972682907272541	1.2391364061538	0.816665393300489
ENSG00000237094.11	RP4-669L17.10	gene_type lincRNA	chr1;chr1;chr1;chr1;chr1;chr1;chr1;chr1;chr1;chr1;chr1;chr1;chr1;chr1;chr1;chr1;chr1;chr1;chr1;chr1;chr1;chr1;chr1;chr1;chr1;chr1;chr1;chr1;chr1;chr1;chr1;chr1;chr1;chr1;chr1;chr1;chr1;chr1;chr1;chr1;chr1;chr1;chr1;chr1;chr1;chr1;chr1;chr1	365389;365395;365615;366019;368251;373144;373182;379769;379769;476531;476738;476887;484832;485040;485040;485040;485066;489361;489361;494382;494464;494876;494992;494992;494992;495277;496264;497109;497109;497134;497240;497275;497279;498047;498073;498281;498399;498399;498399;498399;498399;498684;498684;498684;498684;498984;501556;501556	365692;365692;365692;366120;368450;373323;373323;379870;379972;476945;476882;476945;485208;485208;485208;485208;485208;489553;489710;494586;494898;494898;495049;495049;495049;495476;496665;497299;497259;497299;497299;497299;497299;498305;498305;498305;498456;498456;498976;498456;498456;499175;499002;498976;499175;499369;501607;501617	4792	3.95230142254003	3.55782624462725	3.55782624462725	3.55782624462725	3.99376167689582	4.21583248886372	4.28233509801111	3.55782624462725	3.96574265195466	3.97475709050258	3.55782624462725	3.55782624462725	0.760766076973291	1	1.16640661925475	0.60520304298605	1.0062678942155	1
ENSG00000269732.1	WBP1LP7	gene_type processed_pseudogene	chr1	439870	440232	363	3.55782624462725	3.55782624462725	3.55782624462725	3.55782624462725	3.55782624462725	3.55782624462725	3.55782624462725	3.55782624462725	3.55782624462725	3.55782624462725	3.55782624462725	3.55782624462725	1	1	1	1	1	1
ENSG00000278566.1	OR4F29	gene_type protein_coding	chr1	450740	451678	939	3.55782624462725	3.55782624462725	3.55782624462725	3.55782624462725	3.55782624462725	3.55782624462725	3.55782624462725	3.55782624462725	3.55782624462725	3.55782624462725	3.55782624462725	3.55782624462725	1	1	1	1	1	1
ENSG00000224813.3	SEPT14P13	gene_type transcribed_unprocessed_pseudogene	chr1	485026	485208	183	3.55782624462725	3.55782624462725	3.55782624462725	3.55782624462725	3.55782624462725	3.55782624462725	3.55782624462725	3.55782624462725	3.55782624462725	3.55782624462725	3.55782624462725	3.55782624462725	1	1	1	1	1	1
ENSG00000233653.3	CICP7	gene_type processed_pseudogene	chr1;chr1	487101;489717	489387;489906	2477	3.55782624462725	3.55782624462725	3.55782624462725	3.55782624462725	3.55782624462725	3.55782624462725	3.55782624462725	3.55782624462725	3.55782624462725	3.55782624462725	3.55782624462725	3.55782624462725	1	1	1	1	1	1
ENSG00000250575.1	RP4-669L17.8	gene_type unprocessed_pseudogene	chr1;chr1	491225;492768	491989;493241	1239	3.55782624462725	3.55782624462725	3.55782624462725	3.55782624462725	3.99376167689582	3.55782624462725	3.97903344337653	3.55782624462725	3.55782624462725	3.55782624462725	3.55782624462725	4.15839371305164	1	1	0.73921429838892	0.746799466090436	1	1.51631287442669
ENSG00000278757.1	U6	gene_type snRNA	chr1	516376	516479	104	3.55782624462725	3.55782624462725	3.96520609223261	3.55782624462725	3.55782624462725	3.55782624462725	3.55782624462725	3.55782624462725	3.96574265195466	3.55782624462725	3.55782624462725	3.55782624462725	1	0.753991493562934	1	1	0.753711125063102	1
ENSG00000230021.8	RP5-857K21.4	gene_type lincRNA	chr1;chr1;chr1;chr1;chr1;chr1;chr1;chr1;chr1;chr1;chr1;chr1;chr1;chr1;chr1;chr1;chr1;chr1;chr1;chr1;chr1;chr1;chr1;chr1;chr1;chr1;chr1;chr1;chr1;chr1;chr1;chr1;chr1;chr1;chr1;chr1;chr1;chr1;chr1;chr1;chr1;chr1	585989;585990;586821;586821;588117;594308;594308;594453;594459;594629;595083;597299;601398;601398;601398;601436;607955;607955;607955;627377;627961;628919;628919;698927;701936;703685;703685;711342;711711;711711;711715;711864;720032;720032;720032;720032;720032;720058;724358;724358;827671;827671	586358;586358;586955;586955;588453;594756;594756;594756;594756;594756;595217;597498;601577;601577;601577;601577;608056;608056;608056;627823;628223;629010;629008;698959;702340;703789;703789;711922;711922;711922;711859;711922;720200;720200;720150;720194;720200;720200;724550;724707;827796;827769	4479	4.2369208620727	4.43382827630526	4.45715275953258	4.6881228546508	4.51847424846376	4.40257149830365	5.01869271204275	4.11146652358321	4.81218729988587	4.56224313213017	4.89885243935514	4.29078246946898	1.14623862285823	1.17362385058543	0.922804695393598	0.533209286300975	0.840928958543344	0.656073807319117
ENSG00000235146.2	RP5-857K21.2	gene_type lincRNA	chr1;chr1;chr1;chr1	587629;587668;594235;594235	587701;587729;594574;594768	635	3.55782624462725	3.55782624462725	3.55782624462725	3.55782624462725	4.30730794355666	3.55782624462725	3.55782624462725	3.55782624462725	3.55782624462725	3.55782624462725	3.97541602041241	3.55782624462725	1	1	0.59481721251312	1	1	0.748674345507322
ENSG00000225972.1	MTND1P23	gene_type unprocessed_pseudogene	chr1	629062	629433	372	4.65072872024457	4.83507646650019	5.02334307364636	4.76204181669927	4.89341836085845	5.2555352637812	5.29372603494378	5.26202784332806	5.02513440427485	5.19379263846555	5.00702687300706	5.39193585366495	1.13630312553135	0.834335040955792	1.28531048315527	0.978268103411905	1.12401262038332	1.30577740325447
ENSG00000225630.1	MTND2P28	gene_type unprocessed_pseudogene	chr1	629640	630683	1044	10.7526925078674	11.2716695702706	10.8382530513695	10.9665169493271	11.2721523072696	11.2450282232119	11.3122203956719	11.4015631054656	11.0588003138662	11.0546744189219	11.4432543642272	11.5421010710009	1.4329388677098	1.09297764842508	0.981374653647143	1.06388536706783	0.997144233034582	1.07091702710601
ENSG00000237973.1	MTCO1P12	gene_type unprocessed_pseudogene	chr1	631074	632616	1543	8.35708988051919	7.76890698002584	7.52699561310437	7.56271846002989	7.48215611302827	7.75264663395561	8.96124645979489	8.77338018624973	9.05849523064275	8.27762557667369	10.4404486351978	8.51907557671203	0.665180185671948	1.02507029489888	1.206217875913	0.877903168539817	0.582015849366231	0.264003130409794
ENSG00000278791.1	MIR6723	gene_type miRNA	chr1	632325	632413	89	3.55782624462725	3.55782624462725	3.55782624462725	3.55782624462725	3.55782624462725	3.55782624462725	3.55782624462725	3.55782624462725	3.55782624462725	3.55782624462725	3.55782624462725	3.55782624462725	1	1	1	1	1	1
ENSG00000229344.1	MTCO2P12	gene_type unprocessed_pseudogene	chr1	632757	633438	682	5.67109916535964	5.47961447594795	5.35623759786585	5.43152304054656	5.70935504728914	5.35529802775334	6.01986062690363	5.85877692875048	5.83644186555998	5.6883436813168	5.80332779688444	5.81468545545703	0.875704063141697	1.05356946804621	0.782380859141136	0.894353014263163	0.902439308844371	1.00790359885313
ENSG00000240409.1	MTATP8P1	gene_type unprocessed_pseudogene	chr1	633535	633741	207	4.33963517379083	4.43382827630526	3.55782624462725	4.17289735623919	4.42012488630275	3.9399101021215	4.4868859099821	4.23386063257747	3.96574265195466	4.27507766239493	4.14636171533227	4.29078246946898	1.06746820745766	1.53163349069426	0.716870890439863	0.83913493452665	1.2391364061538	1.10528678865954
ENSG00000248527.1	MTATP6P1	gene_type unprocessed_pseudogene	chr1	633696	634376	681	12.4021410121029	12.9632802583469	12.5265340224689	12.7247001030736	12.7403665170254	12.9792843774563	13.072592814604	13.3461774227268	12.8095873145593	12.4556672213565	12.9388034064237	13.095437871357	1.47543385634425	1.14723908484111	1.18010715224606	1.20880757652647	0.782455118511963	1.11468375596714
ENSG00000198744.5	MTCO3P12	gene_type unprocessed_pseudogene	chr1	634376	634922	547	4.88165347214391	4.77901403647871	4.92229794048178	5.0133520825139	5.3055413352739	4.79088638399139	4.78830407589882	5.18682391094459	4.81218729988587	4.71030396550859	4.95429551510003	5.13476583025991	0.931327551995063	1.06514817594688	0.699960321971804	1.31815482661725	0.931815778889824	1.13325326295897
ENSG00000268663.1	WBP1LP6	gene_type processed_pseudogene	chr1	674842	675265	424	3.55782624462725	3.55782624462725	3.55782624462725	3.55782624462725	3.55782624462725	3.55782624462725	3.55782624462725	3.55782624462725	3.55782624462725	3.55782624462725	3.55782624462725	3.55782624462725	1	1	1	1	1	1
ENSG00000273547.1	OR4F16	gene_type protein_coding	chr1	685716	686654	939	3.55782624462725	3.55782624462725	3.55782624462725	3.55782624462725	3.55782624462725	3.55782624462725	3.55782624462725	3.55782624462725	3.55782624462725	3.55782624462725	3.55782624462725	3.55782624462725	1	1	1	1	1	1
ENSG00000283574.1	RP11-206L10.17	gene_type transcribed_processed_pseudogene	chr1	720024	720206	183	3.55782624462725	3.55782624462725	3.55782624462725	3.55782624462725	3.55782624462725	3.55782624462725	3.55782624462725	3.55782624462725	3.55782624462725	3.55782624462725	3.55782624462725	3.55782624462725	1	1	1	1	1	1
ENSG00000229376.3	CICP3	gene_type processed_pseudogene	chr1;chr1	722092;724718	724360;724903	2455	3.55782624462725	3.55782624462725	3.55782624462725	3.55782624462725	3.55782624462725	3.55782624462725	4.1514250525846	3.55782624462725	3.55782624462725	3.97475709050258	3.55782624462725	3.55782624462725	1	1	1	0.662687766517553	1.33508430584895	1
ENSG00000228327.3	RP11-206L10.2	gene_type transcribed_unprocessed_pseudogene	chr1;chr1;chr1;chr1;chr1;chr1;chr1;chr1;chr1;chr1;chr1;chr1;chr1;chr1;chr1;chr1;chr1;chr1;chr1;chr1;chr1	725885;733307;735423;743180;744195;744728;746695;756077;758967;764723;764723;765144;766329;766329;768548;768548;769497;772976;774171;774171;778284	729804;733364;735613;743350;744391;744825;746818;756141;759123;764800;765247;765247;766387;766387;768613;768613;769712;773107;774280;774280;778626	6432	4.93201948086083	5.41577541467509	4.92229794048178	5.12005160275531	5.34815249541593	5.50541422950751	5.37282041029262	5.39962633946357	5.35835429668978	5.00489975279983	5.00702687300706	5.13476583025991	1.39837949356998	1.1469111743722	1.11516851452493	1.0187541449499	0.782707652978962	1.09258002864327
ENSG00000223181.1	RNU6-1199P	gene_type snRNA	chr1	758233	758336	104	3.55782624462725	3.55782624462725	3.55782624462725	3.55782624462725	3.55782624462725	3.55782624462725	3.55782624462725	3.55782624462725	3.55782624462725	3.55782624462725	3.55782624462725	3.55782624462725	1	1	1	1	1	1
ENSG00000229905.1	RP11-206L10.4	gene_type antisense	chr1;chr1	760911;761778	761154;761989	456	3.55782624462725	3.55782624462725	3.55782624462725	3.55782624462725	3.55782624462725	3.55782624462725	3.55782624462725	3.55782624462725	3.55782624462725	3.55782624462725	3.55782624462725	3.55782624462725	1	1	1	1	1	1
ENSG00000237491.8	RP11-206L10.9	gene_type lincRNA	chr1;chr1;chr1;chr1;chr1;chr1;chr1;chr1;chr1;chr1;chr1;chr1;chr1;chr1;chr1;chr1;chr1;chr1;chr1;chr1;chr1;chr1;chr1;chr1;chr1;chr1;chr1;chr1;chr1;chr1;chr1;chr1;chr1;chr1;chr1;chr1;chr1;chr1;chr1;chr1;chr1;chr1;chr1;chr1;chr1;chr1;chr1;chr1;chr1;chr1;chr1;chr1;chr1;chr1;chr1;chr1;chr1;chr1;chr1;chr1;chr1	778770;778782;778930;778937;779056;781937;781937;781937;781937;783111;783111;784370;784370;784370;784370;784370;784370;784370;784370;784370;784370;784370;784370;784370;784370;784396;785800;786393;792882;792882;795470;795470;795470;801607;803567;803567;803919;803919;803919;803919;803919;803922;803951;803951;804776;804776;804776;804776;804776;804776;804776;804799;804932;806386;807217;807217;807217;…	779092;779092;779092;779092;779092;782136;782191;782043;782136;783363;783363;784493;784493;784493;784493;784493;784493;784493;784759;784977;784493;784493;784429;784690;784655;784493;787672;786866;793041;793041;795582;795582;795513;801876;803667;803667;804222;804222;804222;804222;804222;804222;804222;804222;804966;804966;804966;805127;805270;804832;804875;804966;804966;806459;807465;807323;807321;…	5517	4.82873677450076	4.88822384368833	4.68501284740425	4.89520442241869	5.11801324966921	4.98326642299408	5.11783498966142	4.50552303053715	4.54119739532673	4.89686259953378	4.56377988186717	4.66234229816799	1.04209519204399	1.15684179035883	0.910829657764177	0.654147571757275	1.27957543757947	1.07070601819248
ENSG00000230092.7	RP11-206L10.8	gene_type transcribed_unprocessed_pseudogene	chr1;chr1;chr1;chr1;chr1;chr1;chr1;chr1	800879;805799;805799;808574;808574;810067;810067;817373	801163;805891;805891;808623;808623;810161;810170;817712	872	4.58305459595839	4.51461706795932	4.61539758452791	4.42132383357474	3.55782624462725	4.40257149830365	3.97903344337653	4.42545549391194	4.13281753800557	4.63926676564394	4.14636171533227	4.15839371305164	0.953670285860552	0.874133933309638	1.7959475952755	1.36265661217934	1.42054962166216	1.00837481952175
ENSG00000177757.2	FAM87B	gene_type lincRNA	chr1;chr1	817371;818723	818202;819837	1947	4.2369208620727	4.24046069271801	4.68501284740425	3.55782624462725	4.51847424846376	4.5518999672019	4.39158453445309	3.95050242154829	4.36577948478197	4.38328681413529	3.97541602041241	3.9840131269933	1.00245663622934	0.457807625081347	1.02343942756446	0.736581918176769	1.01220908573275	1.00597685070739
ENSG00000228794.8	LINC01128	gene_type processed_transcript	chr1;chr1;chr1;chr1;chr1;chr1;chr1;chr1;chr1;chr1;chr1;chr1;chr1;chr1;chr1;chr1;chr1;chr1;chr1;chr1;chr1;chr1;chr1;chr1;chr1;chr1;chr1;chr1;chr1;chr1;chr1;chr1;chr1;chr1;chr1;chr1;chr1;chr1;chr1;chr1;chr1;chr1;chr1;chr1;chr1;chr1;chr1;chr1;chr1;chr1;chr1;chr1;chr1;chr1;chr1;chr1;chr1;chr1;chr1;chr1;chr1;chr1	825138;826832;827608;827657;827661;827661;827667;827669;827673;827699;827700;827721;827821;829003;829003;829003;829003;829003;829003;829003;829003;829003;829003;829003;829003;831605;841200;841200;841200;847654;847654;847654;847654;847654;847654;847654;849484;849484;849484;849484;850178;850181;850181;851348;851927;851927;851927;851927;851927;851927;851927;851927;851927;851927;851927;852671;852671;…	825552;826923;827775;827775;827775;827775;827775;827775;827775;827775;827775;827775;827853;829104;829104;829104;829104;829104;829104;829104;829104;829104;829104;829104;829104;831677;842020;841373;841738;847806;847806;847806;847806;847806;847806;847806;849602;849602;849602;849592;850351;850351;850351;852110;852090;852515;852110;852110;851998;852110;852090;851987;852014;852225;852110;852752;852766;…	9470	6.82761786024977	7.15543112201485	7.09713674195821	7.37628606686724	7.07901605850281	7.25032731539463	7.08491185970011	7.21946078384926	7.18794686687339	7.30708469963758	6.66779851387473	7.03551930657754	1.25510952305512	1.21347915386469	1.12608150845461	1.09774953560977	1.08608561423882	1.29031274980059
ENSG00000225880.5	LINC00115	gene_type lincRNA	chr1	826206	827522	1317	4.58305459595839	4.65626681633109	4.53994339918289	4.51980079659829	4.42012488630275	4.31549205937346	4.6499347801402	4.87596962436536	4.81218729988587	4.38328681413529	4.77825682765974	4.58380936888272	1.05205652528744	0.98613522555415	0.930041612715896	1.16961591248068	0.742827697348093	0.873907531766085
ENSG00000230368.2	FAM41C	gene_type lincRNA	chr1;chr1;chr1;chr1;chr1;chr1;chr1;chr1;chr1;chr1	868071;868240;868403;868627;869528;870086;874112;875040;876746;876746	868675;868530;868675;868675;869575;870201;875155;875155;876802;876903	1971	3.55782624462725	3.55782624462725	3.55782624462725	3.55782624462725	3.99376167689582	3.9399101021215	3.55782624462725	3.55782624462725	3.55782624462725	3.97475709050258	3.55782624462725	3.9840131269933	1	1	0.963361000009112	1	1.33508430584895	1.34367747037693
ENSG00000234711.1	TUBB8P11	gene_type unprocessed_pseudogene	chr1	873292	874349	1058	4.11398763489342	4.34368653389374	3.55782624462725	4.17289735623919	3.55782624462725	3.55782624462725	3.55782624462725	3.55782624462725	3.55782624462725	3.55782624462725	3.55782624462725	3.55782624462725	1.17259019554756	1.53163349069426	1	1	1	1
ENSG00000283040.1	FAM166AP3	gene_type transcribed_unprocessed_pseudogene	chr1;chr1;chr1;chr1;chr1	874529;875047;875526;876527;876755	874591;875155;875625;876611;877234	837	3.55782624462725	3.55782624462725	3.55782624462725	3.55782624462725	3.55782624462725	3.55782624462725	3.55782624462725	3.55782624462725	3.55782624462725	3.55782624462725	3.55782624462725	3.55782624462725	1	1	1	1	1	1
ENSG00000272438.1	RP11-54O7.16	gene_type lincRNA	chr1;chr1	904834;915750	904957;915976	351	4.2369208620727	3.55782624462725	3.55782624462725	3.55782624462725	3.99376167689582	4.67900310144742	4.39158453445309	4.70873254366796	4.36577948478197	4.71030396550859	3.97541602041241	4.49757563693745	0.624557100645793	1	1.60797104126464	1.24586522503018	1.26973240360939	1.43610338907385
ENSG00000230699.2	RP11-54O7.1	gene_type lincRNA	chr1;chr1	911435;911945	911473;914948	3043	4.65072872024457	4.93880604644348	4.92229794048178	4.42132383357474	5.01143118136676	5.06791939041892	5.58367315386047	5.43173896114678	5.32147805466498	4.56224313213017	4.84032743934117	5.08584679014197	1.22101195524737	0.706629504219136	1.03993128914344	0.900042983539318	0.590809560631751	1.18551946518916
ENSG00000241180.1	RP11-54O7.2	gene_type lincRNA	chr1;chr1	914171;914803	914444;914971	443	3.55782624462725	3.55782624462725	3.55782624462725	3.55782624462725	3.55782624462725	4.09661836972613	3.97903344337653	4.23386063257747	3.55782624462725	3.55782624462725	3.55782624462725	3.9840131269933	1	1	1.45275570996825	1.19319280987744	1	1.34367747037693
ENSG00000223764.2	RP11-54O7.3	gene_type lincRNA	chr1;chr1;chr1;chr1;chr1;chr1;chr1	916865;916870;917370;918022;918022;918825;919335	921016;917720;917486;918110;918534;918915;919692	4152	7.24781659237119	8.13405572003737	7.67498302125082	7.69006256886925	8.21001041545466	8.14524972964965	9.0130072157005	8.90345579654872	8.45955695246721	7.68723184199538	8.51158132353656	8.4394875664075	1.84835148499751	1.01050716250425	0.956103902917035	0.926876213074903	0.585473139717633	0.951256454553985
ENSG00000187634.11	SAMD11	gene_type protein_coding	chr1;chr1;chr1;chr1;chr1;chr1;chr1;chr1;chr1;chr1;chr1;chr1;chr1;chr1;chr1;chr1;chr1;chr1;chr1;chr1;chr1;chr1;chr1;chr1;chr1;chr1;chr1;chr1;chr1;chr1;chr1;chr1;chr1;chr1;chr1;chr1;chr1;chr1;chr1;chr1;chr1;chr1;chr1;chr1;chr1;chr1;chr1;chr1;chr1;chr1;chr1;chr1;chr1;chr1;chr1;chr1;chr1;chr1;chr1;chr1;chr1;chr1;chr1;chr1;chr1;chr1;chr1;chr1;chr1;chr1;chr1;chr1;chr1;chr1;chr1;chr1;chr1;chr1;chr1;chr1…	923928;925150;925738;925741;925741;925741;925741;925741;925741;925741;925741;925922;925922;925922;925922;925922;925922;925922;925922;925922;925922;925922;930155;930155;930155;930155;930155;930155;930155;930155;930155;930155;930155;930312;931039;931039;931039;931039;931039;931039;931039;931039;931039;931039;931039;935772;935772;935772;935772;935772;935772;935772;935772;935772;935772;935772;939040;…	924948;925189;925800;925800;925800;925800;925800;925800;925800;925800;925800;926013;926013;926013;926013;926013;926013;926013;926013;926013;926013;926013;930336;930336;930336;930336;930336;930336;930336;930336;930336;930336;930336;930336;931089;931089;931089;931089;931089;931089;931089;931089;931089;931089;931089;935896;935896;935896;935896;935896;935805;935896;935896;935896;935793;935896;939129;…	4166	8.63968726754095	8.88216296389179	8.40453142851428	8.24520689673423	9.13942177954009	8.94211838515157	9.76080591380677	9.56460324861547	9.11879282944185	8.63148627206091	9.23497738047301	8.87155979295483	1.18302101060213	0.895444218789311	0.872179269830043	0.872844968047917	0.713355656249009	0.77732100805372
ENSG00000188976.10	NOC2L	gene_type protein_coding	chr1;chr1;chr1;chr1;chr1;chr1;chr1;chr1;chr1;chr1;chr1;chr1;chr1;chr1;chr1;chr1;chr1;chr1;chr1;chr1;chr1;chr1;chr1;chr1;chr1;chr1;chr1;chr1;chr1;chr1;chr1;chr1;chr1;chr1;chr1;chr1;chr1;chr1;chr1;chr1;chr1;chr1;chr1;chr1;chr1;chr1;chr1;chr1;chr1;chr1;chr1;chr1	944204;944204;944205;945042;945042;945057;945319;945518;945518;945518;945518;946173;946173;946173;946402;946402;946402;948131;948131;948490;948490;951127;951127;952000;952000;952412;952412;953175;953175;953782;953782;954004;954004;954426;955923;955923;955923;956095;956095;956095;956894;956894;956894;957099;957099;957099;958246;958929;958929;959215;959215;959215	944800;944800;944800;945146;945146;945146;945422;945562;945653;945653;945653;946286;946286;946286;946545;946545;947060;948232;948232;948603;948603;951238;951238;952139;952139;952600;952600;953288;953288;953892;953892;954523;954082;954523;956013;956013;956013;956215;956215;956215;957025;957025;957025;957273;958458;957273;959081;959081;959081;959256;959309;959290	5539	11.1259362552719	11.1883212312712	11.4060350558485	11.5065052749083	11.3212380883972	11.4538661341374	10.8543300440484	11.2810330981265	11.4183433099233	11.3755726888279	10.6689411340566	10.5721458635493	1.04419052729963	1.07212284368334	1.09628890798829	1.34415830130024	0.970788806455725	0.935107887318477
ENSG00000187961.13	KLHL17	gene_type protein_coding	chr1;chr1;chr1;chr1;chr1;chr1;chr1;chr1;chr1;chr1;chr1;chr1;chr1;chr1;chr1;chr1;chr1;chr1;chr1;chr1;chr1;chr1;chr1;chr1;chr1;chr1;chr1;chr1;chr1;chr1;chr1	960587;960639;961293;961449;961629;961826;961826;962082;962355;962704;962704;962727;963032;963109;963109;963337;963337;963337;963552;963920;963920;963920;964107;964107;964107;964107;964349;964349;964349;964963;964963	960800;960699;961552;961750;961750;962478;962047;962471;962471;962917;962917;962917;963253;963253;963253;963504;963504;963504;964008;964008;964008;964008;964164;964167;964167;964180;964530;964530;964530;965602;965715	3395	7.19612858084595	7.66419797208896	7.08706668048701	7.1395911069761	7.64779923802667	7.76375262410848	7.76168234648384	7.82958481179216	7.69834160337005	7.35174281648345	7.07463363661358	7.09177235216774	1.38325715979027	1.03707801528722	1.08369095189288	1.04819160918798	0.786435969369199	1.01195049568835
ENSG00000187583.10	PLEKHN1	gene_type protein_coding	chr1;chr1;chr1;chr1;chr1;chr1;chr1;chr1;chr1;chr1;chr1;chr1;chr1;chr1;chr1;chr1;chr1;chr1;chr1;chr1;chr1;chr1;chr1;chr1;chr1;chr1;chr1;chr1;chr1;chr1;chr1;chr1;chr1;chr1;chr1;chr1;chr1;chr1;chr1;chr1;chr1;chr1;chr1;chr1;chr1;chr1;chr1;chr1;chr1;chr1;chr1;chr1;chr1;chr1	966497;966502;966502;966704;966704;966704;970277;970277;970277;970521;970521;970521;970686;970686;970686;970875;970879;970879;971077;971077;971077;971113;971324;971324;971324;971324;972075;972075;972075;972288;972288;972288;972861;972861;972861;973186;973186;973500;973500;973500;973512;973833;973833;973833;973833;974316;974316;974316;974316;974442;974442;974442;974442;975712	966614;966614;966614;966803;966803;966803;970423;970423;970423;970601;970601;970601;970758;971006;970758;971006;971006;971006;971208;971208;971208;971208;971523;971404;971404;971404;972150;972150;972150;972424;972424;972424;973010;973010;973010;973326;973326;973640;973640;973640;973640;974051;974051;974051;974051;974364;974364;974364;974364;974588;975008;975008;975108;975865	2833	6.52412024265449	7.15543112201485	6.83321517840512	6.77092663710187	6.89254600692132	7.20199619841042	6.82420904672618	7.30250708186392	7.99554044107398	7.60123808151851	6.36594377501976	6.35579889266948	1.54897180017066	0.95774364881288	1.23923533955581	1.3930992404724	0.760857213502397	0.992992769336709
ENSG00000187642.9	PERM1	gene_type protein_coding	chr1;chr1;chr1;chr1;chr1;chr1;chr1;chr1;chr1;chr1	975204;975205;975205;976499;976499;976499;978881;978881;981137;982065	976269;976269;976269;976624;976641;976624;981029;980657;981173;982093	3424	5.37404480949129	5.92275158978681	5.73005450660548	5.57943254312057	5.16778017850539	5.73758897506234	5.76457241978821	5.9887973845049	6.62817773038689	6.19294519891995	5.19614844504459	5.22680128729916	1.46277388987161	0.900862006248884	1.48432683659904	1.16814953424315	0.739574541479439	1.02147425434586
ENSG00000272512.1	RP11-54O7.17	gene_type lincRNA	chr1	995966	998051	2086	4.65072872024457	5.73277097827133	5.11592989685119	5.71196728643406	5.70935504728914	5.56076325061849	6.55234492091167	6.39630519866283	5.39415100968182	5.23655356908095	4.84032743934117	5.69872671734296	2.1170307988592	1.5115591021058	0.902130595603827	0.897485339535827	0.896516822371597	1.81302557720286
ENSG00000188290.10	HES4	gene_type protein_coding	chr1;chr1;chr1;chr1;chr1;chr1;chr1;chr1;chr1;chr1;chr1;chr1	998962;998964;998966;998970;999526;999526;999526;999526;999692;999692;999866;999866	999432;999432;999432;999432;999613;1000096;999613;999613;999787;1000172;999981;1000111	1118	8.61052730447263	9.26694469061969	8.58244638269648	9.00676545550965	8.7319545466268	9.4175746384281	9.56478370672173	9.74666292285317	9.78163464932288	9.47107889835856	8.67845317304429	8.80295072670049	1.57616370611311	1.34193898122266	1.60839314425198	1.13436051116633	0.80633108677296	1.09012800846396
ENSG00000187608.8	ISG15	gene_type protein_coding	chr1;chr1;chr1;chr1;chr1;chr1;chr1;chr1	1001138;1001145;1008194;1008194;1013423;1013984;1013984;1013984	1001281;1001263;1008279;1008279;1013576;1014435;1014541;1014540	942	9.68388353407852	9.37986701015442	11.8059397124683	11.7255382031566	9.52622432060496	9.65766609347242	9.63618685714897	9.9498690043138	9.62937258089603	9.81838559695193	9.01425147006485	8.75186345336733	0.809994196301154	0.945794390741836	1.09538784211706	1.24287580983424	1.13998355762711	0.833706785994601
ENSG00000231702.2	RP11-54O7.10	gene_type processed_pseudogene	chr1	1008076	1008229	154	3.55782624462725	3.55782624462725	3.55782624462725	3.99438106532615	3.99376167689582	3.55782624462725	3.55782624462725	3.95050242154829	3.55782624462725	3.55782624462725	3.55782624462725	3.55782624462725	1	1.35336859919879	0.73921429838892	1.31282641920024	1	1
ENSG00000224969.1	RP11-54O7.11	gene_type antisense	chr1;chr1	1011997;1012917	1012190;1013193	471	4.2369208620727	4.43382827630526	3.96520609223261	3.55782624462725	4.51847424846376	4.40257149830365	4.78830407589882	4.64593913043284	4.13281753800557	4.14543931115403	3.97541602041241	4.29078246946898	1.14623862285823	0.753991493562934	0.922804695393598	0.906032718405996	1.00878712860413	1.24432767628636
ENSG00000188157.14	AGRN	gene_type protein_coding	chr1;chr1;chr1;chr1;chr1;chr1;chr1;chr1;chr1;chr1;chr1;chr1;chr1;chr1;chr1;chr1;chr1;chr1;chr1;chr1;chr1;chr1;chr1;chr1;chr1;chr1;chr1;chr1;chr1;chr1;chr1;chr1;chr1;chr1;chr1;chr1;chr1;chr1;chr1;chr1;chr1;chr1;chr1;chr1;chr1;chr1;chr1;chr1;chr1;chr1;chr1;chr1;chr1;chr1;chr1;chr1;chr1;chr1;chr1;chr1;chr1;chr1;chr1;chr1;chr1;chr1;chr1;chr1;chr1;chr1;chr1;chr1;chr1;chr1;chr1;chr1;chr1;chr1;chr1;chr1…	1020123;1020123;1022201;1022201;1034106;1034867;1035277;1035277;1035277;1040665;1040665;1040665;1040665;1041173;1041173;1041173;1041478;1041478;1041956;1041956;1043239;1043239;1043538;1043538;1043823;1043823;1044109;1044109;1044334;1044334;1045161;1045161;1045359;1045359;1045399;1045733;1045733;1045733;1045964;1045964;1045964;1046160;1046160;1046160;1046397;1046397;1046820;1046820;1047201;1047327…	1020373;1020373;1022462;1022462;1034703;1035324;1035324;1035324;1035324;1040880;1040725;1040880;1040880;1041397;1041397;1041397;1041702;1041702;1042162;1042162;1043457;1043457;1043732;1043732;1044023;1044023;1044257;1044257;1044439;1044439;1045277;1045277;1045523;1045523;1045523;1045876;1045876;1045876;1046088;1046088;1046088;1046349;1046265;1046265;1046735;1046735;1046957;1046957;1047454;1047454…	10758	11.0387036203062	12.4047831457534	11.557595129371	11.9301915068913	12.0874333498528	12.3347197550358	12.5556904335199	12.9060649343584	13.15678336889	12.6518140224205	11.2671775472362	11.483847048727	2.57769134672024	1.29468073563208	1.18697241315374	1.2748915260666	0.704675349936804	1.16204787032197
ENSG00000242590.1	RP11-54O7.14	gene_type sense_intronic	chr1;chr1	1055033;1055898	1055215;1056116	402	3.55782624462725	3.55782624462725	3.55782624462725	3.55782624462725	3.55782624462725	3.55782624462725	3.55782624462725	3.55782624462725	3.55782624462725	3.55782624462725	3.55782624462725	3.55782624462725	1	1	1	1	1	1
ENSG00000217801.9	RP11-465B22.3	gene_type transcribed_unprocessed_pseudogene	chr1;chr1;chr1;chr1;chr1;chr1;chr1;chr1;chr1;chr1;chr1;chr1;chr1;chr1;chr1;chr1;chr1;chr1;chr1;chr1;chr1;chr1;chr1	1059734;1060280;1061020;1063079;1063079;1063079;1063079;1063480;1064210;1064490;1064495;1064518;1065352;1065830;1065830;1065830;1065830;1065949;1066587;1067566;1067869;1068577;1069208	1059846;1060393;1061117;1063201;1063201;1063201;1063201;1063566;1064401;1064589;1064589;1064589;1065475;1066274;1066456;1066005;1066456;1066441;1066667;1067646;1068003;1068724;1069355	2171	6.74565647128075	7.31085549720922	6.59685620566005	6.89593019766465	7.06731886465309	7.27389188620523	6.94868203936358	7.61307147718887	7.41438883523243	7.50185402323465	5.50247331226852	5.53750240148492	1.47959161113771	1.23035444475127	1.15394384701388	1.58489738771635	1.06250172831113	1.02457748149129
ENSG00000273443.1	RP11-54O7.18	gene_type lincRNA	chr1;chr1	1062208;1063061	1062808;1063288	829	4.58305459595839	4.83507646650019	3.96520609223261	4.60791311011023	4.8290842810492	4.61768887839909	4.85082485685873	4.70873254366796	4.86958772347916	4.56224313213017	4.14636171533227	4.49757563693745	1.19087490230144	1.56125589358985	0.863701438377496	0.906203951477111	0.808127822383197	1.27563352752048
ENSG00000237330.2	RNF223	gene_type protein_coding	chr1;chr1	1070966;1074016	1072575;1074307	1902	8.97827000042031	10.0779709085887	9.00790434061886	9.86045315537948	9.22814028510888	10.0626552291377	9.17828172698202	10.4429382974816	10.1960660457354	10.9480508475306	9.12627146839672	9.6730217955585	2.14310258243207	1.80568822507112	1.78325737983972	2.40270007497096	1.68410816572964	1.46079155204835
ENSG00000131591.17	C1orf159	gene_type protein_coding	chr1;chr1;chr1;chr1;chr1;chr1;chr1;chr1;chr1;chr1;chr1;chr1;chr1;chr1;chr1;chr1;chr1;chr1;chr1;chr1;chr1;chr1;chr1;chr1;chr1;chr1;chr1;chr1;chr1;chr1;chr1;chr1;chr1;chr1;chr1;chr1;chr1;chr1;chr1;chr1;chr1;chr1;chr1;chr1;chr1;chr1;chr1;chr1;chr1;chr1;chr1;chr1;chr1;chr1;chr1;chr1;chr1;chr1;chr1;chr1;chr1;chr1;chr1;chr1;chr1;chr1;chr1;chr1;chr1;chr1;chr1;chr1;chr1;chr1;chr1;chr1;chr1;chr1;chr1;chr1…	1081818;1081823;1081823;1081823;1081825;1081825;1081825;1082146;1082235;1082604;1082700;1082916;1083915;1083915;1083915;1083915;1083915;1083915;1083915;1083926;1084353;1084353;1084353;1084353;1084353;1084353;1084353;1084481;1084481;1084481;1084481;1084481;1084481;1084481;1084481;1084481;1085251;1085878;1085878;1085878;1085878;1085878;1085878;1085878;1085878;1085878;1085878;1085878;1087139;1087139…	1082987;1082987;1082987;1082987;1082987;1082987;1084506;1082253;1082987;1082987;1082987;1082987;1084011;1084383;1084072;1084086;1084383;1084086;1084383;1084086;1084383;1084383;1084383;1084383;1084383;1084383;1084506;1084506;1084506;1084506;1084506;1084506;1084506;1084506;1084506;1084506;1085310;1086012;1086012;1086012;1086012;1086012;1086012;1086012;1086012;1086012;1086012;1086012;1087204;1087204…	6322	7.7372882692911	8.65409378634359	7.95397966053427	8.49620558634648	8.21001041545466	8.49048041060473	8.16456636066518	8.72328114019089	8.5860418395183	8.60968571726556	7.74593232961818	7.99373642756052	1.88793031811992	1.45621757458305	1.21459050415901	1.47295645388057	1.01652371838481	1.18739841953068
ENSG00000223823.1	LINC01342	gene_type lincRNA	chr1;chr1;chr1	1137017;1140825;1142739	1137110;1141032;1144056	1620	3.55782624462725	4.34368653389374	4.13206609265227	3.55782624462725	3.55782624462725	4.09661836972613	3.55782624462725	4.11146652358321	4.61674007229362	4.38328681413529	3.97541602041241	4.29078246946898	1.72412011798411	0.67164004343305	1.45275570996825	1.4677846135353	0.850596451710472	1.24432767628636
ENSG00000207730.3	MIR200B	gene_type miRNA	chr1	1167104	1167198	95	4.11398763489342	4.43382827630526	4.13206609265227	3.55782624462725	4.17203110618318	4.31549205937346	4.57221240555981	4.23386063257747	3.96574265195466	4.47769828427326	4.14636171533227	3.55782624462725	1.24819266722761	0.67164004343305	1.1045517043421	0.79094442133652	1.42598186299434	0.665017646772281
ENSG00000207607.3	MIR200A	gene_type miRNA	chr1	1167863	1167952	90	3.55782624462725	4.24046069271801	3.96520609223261	3.99438106532615	3.55782624462725	3.9399101021215	3.97903344337653	3.95050242154829	3.96574265195466	3.97475709050258	3.97541602041241	3.9840131269933	1.60506803171848	1.02042841145107	1.30322289775605	0.980418068928156	1.0062678942155	1.00597685070739
ENSG00000198976.1	MIR429	gene_type miRNA	chr1	1169005	1169087	83	3.95230142254003	4.24046069271801	4.25885812962813	4.42132383357474	4.42012488630275	4.21583248886372	4.28233509801111	4.64593913043284	4.36577948478197	4.56224313213017	3.97541602041241	3.55782624462725	1.22108130976571	1.11919832149129	0.86796429557787	1.28663606379868	1.14588609893268	0.748674345507322
ENSG00000272141.1	RP11-465B22.8	gene_type lincRNA	chr1	1169357	1170343	987	5.02618270918522	5.75806862724559	5.35623759786585	5.26356097242997	5.50521587335695	5.56076325061849	5.84642660912661	5.714627248106	5.78549155127821	5.56577209912732	4.89885243935514	4.73474544680533	1.6608087135855	0.937781272979283	1.03925333473592	0.912692409989399	0.858732410123097	0.892480781229976
ENSG00000205231.1	TTLL10-AS1	gene_type antisense	chr1;chr1	1173056;1179365	1176396;1179555	3532	4.11398763489342	4.43382827630526	3.96520609223261	4.60791311011023	4.17203110618318	4.48066070093918	4.57221240555981	4.50552303053715	4.45830789965566	3.97475709050258	3.97541602041241	4.58380936888272	1.24819266722761	1.56125589358985	1.23853066996855	0.954826574599446	0.715215144592508	1.52456044261892
ENSG00000162571.13	TTLL10	gene_type protein_coding	chr1;chr1;chr1;chr1;chr1;chr1;chr1;chr1;chr1;chr1;chr1;chr1;chr1;chr1;chr1;chr1;chr1;chr1;chr1;chr1;chr1;chr1;chr1;chr1;chr1;chr1;chr1;chr1;chr1;chr1;chr1;chr1;chr1;chr1;chr1;chr1;chr1;chr1;chr1;chr1;chr1;chr1;chr1;chr1;chr1;chr1;chr1;chr1;chr1;chr1;chr1;chr1;chr1;chr1;chr1	1173884;1173903;1173906;1174266;1174285;1174424;1174424;1174521;1179189;1179189;1179657;1179657;1179697;1180034;1180034;1180034;1180483;1180483;1180483;1180484;1180537;1180731;1180731;1180731;1180731;1181741;1181741;1181741;1181741;1182361;1182361;1182361;1182361;1182876;1182876;1182876;1182876;1183920;1183920;1183920;1183920;1184969;1184969;1184969;1185036;1196386;1196600;1196600;1196600;1197093…	1173926;1173926;1173926;1174321;1174321;1174489;1174489;1175034;1179333;1179333;1179737;1179737;1179853;1180340;1180340;1180340;1180601;1180601;1180601;1180860;1180601;1180884;1180860;1180860;1180860;1181815;1181815;1181815;1181815;1182446;1182446;1182446;1182446;1183047;1183047;1183047;1183047;1183927;1184091;1184091;1184091;1185864;1185109;1185109;1185109;1196488;1196716;1196716;1196716;1197186…	3943	4.2369208620727	5.16169540073153	4.53994339918289	4.51980079659829	4.6064747281835	4.73655556449821	4.85082485685873	4.97407035781243	4.92398302613155	4.95223473808129	4.27619612797294	4.29078246946898	1.8983875427127	0.98613522555415	1.09435501785627	1.08918234386832	1.01977559122109	1.01016176508884
ENSG00000186891.13	TNFRSF18	gene_type protein_coding	chr1;chr1;chr1;chr1;chr1;chr1;chr1;chr1;chr1;chr1;chr1;chr1;chr1;chr1;chr1;chr1;chr1;chr1	1203508;1203511;1203844;1203844;1204034;1204034;1204055;1204399;1204399;1204399;1204399;1205370;1205370;1205370;1205370;1206385;1206385;1206385	1203960;1203968;1203968;1203968;1204236;1204236;1204236;1204486;1204486;1204486;1204486;1205680;1205492;1205492;1205492;1206571;1206691;1206571	1370	7.55833467562831	7.67692110905373	7.27605811353686	7.16180736189542	7.22292350722465	7.49033255818764	7.67126363494973	7.94227142092046	8.48652202396286	8.5612875656191	7.88619351351069	7.51767126333544	1.08567059065905	0.923861984078724	1.20364424991259	1.20665043178279	1.05318986380136	0.774575486791247
ENSG00000186827.10	TNFRSF4	gene_type protein_coding	chr1;chr1;chr1;chr1;chr1;chr1;chr1;chr1;chr1;chr1;chr1;chr1;chr1;chr1;chr1;chr1	1211326;1211340;1211704;1211942;1211942;1212019;1212638;1212638;1212638;1212992;1212992;1212992;1213395;1213663;1213983;1213983	1211625;1211832;1211832;1212138;1212138;1212138;1212704;1212704;1212704;1213093;1213785;1213093;1213498;1213785;1214138;1214132	1721	3.55782624462725	3.55782624462725	3.55782624462725	3.55782624462725	3.55782624462725	4.09661836972613	3.97903344337653	3.95050242154829	3.96574265195466	3.97475709050258	3.55782624462725	3.9840131269933	1	1	1.45275570996825	0.980418068928156	1.0062678942155	1.34367747037693
ENSG00000078808.16	SDF4	gene_type protein_coding	chr1;chr1;chr1;chr1;chr1;chr1;chr1;chr1;chr1;chr1;chr1;chr1;chr1;chr1;chr1;chr1;chr1;chr1;chr1;chr1;chr1;chr1;chr1;chr1;chr1;chr1;chr1;chr1;chr1;chr1;chr1;chr1;chr1;chr1	1216908;1216931;1216931;1216932;1216934;1218458;1218458;1218458;1218458;1218458;1218523;1218769;1218769;1218769;1218769;1218769;1223244;1223244;1223244;1223244;1223832;1223832;1223832;1223832;1227272;1228468;1228468;1228468;1228468;1228468;1231892;1231892;1231892;1231892	1217688;1217804;1217804;1217688;1217688;1220293;1218633;1218633;1218633;1218633;1218633;1219005;1218927;1221351;1218943;1218927;1223357;1223357;1223357;1223357;1223968;1223968;1223968;1223968;1227319;1228946;1228596;1228946;1228946;1228946;1231968;1232031;1232031;1232001	4709	11.5155192032027	11.6512425732604	11.4780791444947	11.6577757779951	11.537539746045	11.6601610601283	11.4675925660527	11.8002723629341	11.9288500793776	11.8781535166497	11.3870950109388	11.2057842599682	1.09864353768328	1.13264569019738	1.08871120738416	1.25935043875555	0.965470067641606	0.881901386566173
ENSG00000176022.4	B3GALT6	gene_type protein_coding	chr1	1232265	1235041	2777	8.19182819204154	9.36818265082565	8.49434406000037	8.96657406544605	8.76469129475815	9.42979558411648	9.00734697452583	9.47131532570982	9.45132098942817	9.39244695176651	8.69239144118856	9.15715664058207	2.26004963728925	1.38725211781438	1.58568289472404	1.37933066272174	0.960013076543681	1.3800927231247
ENSG00000184163.3	C1QTNF12	gene_type protein_coding	chr1;chr1;chr1;chr1;chr1;chr1;chr1;chr1;chr1;chr1;chr1;chr1;chr1;chr1;chr1;chr1;chr1;chr1	1242446;1242449;1242453;1242835;1242835;1242835;1243062;1243062;1243266;1243444;1243954;1243954;1243981;1244191;1244381;1244381;1244381;1246514	1242646;1242646;1242646;1242913;1243158;1242913;1243152;1243463;1243552;1243552;1244275;1244105;1244275;1244275;1244724;1244418;1244497;1246722	1794	4.42933801147896	4.93880604644348	4.74983364191774	4.83079477478604	3.99376167689582	4.61768887839909	4.4868859099821	4.92614825130183	5.20354744599443	4.71030396550859	4.38456570337338	3.55782624462725	1.42352520227296	1.05772246751145	1.54106445253044	1.35591086476964	0.710426114411611	0.563802015822352
ENSG00000260179.1	RP5-902P8.12	gene_type lincRNA	chr1	1249777	1251334	1558	3.55782624462725	3.95438272415751	3.96520609223261	3.55782624462725	4.17203110618318	4.09661836972613	4.28233509801111	4.23386063257747	4.45830789965566	4.27507766239493	3.97541602041241	3.55782624462725	1.3163621772543	0.753991493562934	0.949070565251434	0.966958269516835	0.880728808890459	0.748674345507322
ENSG00000160087.20	UBE2J2	gene_type protein_coding	chr1;chr1;chr1;chr1;chr1;chr1;chr1;chr1;chr1;chr1;chr1;chr1;chr1;chr1;chr1;chr1;chr1;chr1;chr1;chr1;chr1;chr1;chr1;chr1;chr1;chr1;chr1;chr1;chr1;chr1;chr1;chr1;chr1;chr1;chr1;chr1;chr1;chr1;chr1;chr1;chr1;chr1;chr1;chr1;chr1;chr1;chr1;chr1;chr1;chr1;chr1;chr1;chr1;chr1;chr1;chr1;chr1;chr1;chr1;chr1;chr1;chr1;chr1;chr1;chr1;chr1;chr1;chr1;chr1;chr1;chr1;chr1;chr1;chr1;chr1;chr1;chr1;chr1;chr1;chr1…	1253909;1253914;1254470;1254985;1255048;1255164;1255178;1255264;1255268;1255395;1255439;1256045;1256045;1256045;1256045;1256045;1256045;1256045;1256045;1256045;1256045;1256045;1256049;1256992;1256992;1256992;1256992;1256992;1256992;1256992;1256992;1256992;1256992;1256992;1256992;1257011;1257049;1257122;1257208;1257208;1257208;1257208;1257208;1257208;1257208;1257208;1257208;1257208;1257208;1257208…	1255487;1255487;1255487;1255487;1255487;1255487;1255487;1255487;1255487;1255487;1255487;1256125;1256125;1256125;1256335;1256125;1256125;1256125;1256125;1256125;1256125;1256125;1256125;1257130;1257130;1257130;1257130;1257130;1257130;1257130;1257130;1257130;1257130;1257130;1257130;1257130;1257130;1257130;1257310;1257310;1257310;1257310;1257310;1257310;1257310;1257310;1257310;1257310;1257310;1257310…	4712	9.84267451018776	9.97261858038019	9.88131744345237	9.95983016244203	9.9045247924347	10.037781209199	9.6883950704575	10.0889403882719	10.1389973350156	10.1705407270147	9.47551761599	9.45410112512803	1.09425127895522	1.05592891724743	1.09676650457483	1.3200067599106	1.02210498671187	0.985264860291563
ENSG00000230415.1	LINC01786	gene_type lincRNA	chr1;chr1;chr1;chr1;chr1	1275223;1275237;1279068;1279068;1280311	1275299;1275299;1279393;1279148;1280420	513	3.55782624462725	4.34368653389374	3.55782624462725	3.55782624462725	4.17203110618318	3.55782624462725	4.39158453445309	4.64593913043284	3.55782624462725	4.14543931115403	4.27619612797294	4.29078246946898	1.72412011798411	1	0.653289853716818	1.19280201177512	1.50275838144031	1.01016176508884
ENSG00000162572.20	SCNN1D	gene_type protein_coding	chr1;chr1;chr1;chr1;chr1;chr1;chr1;chr1;chr1;chr1;chr1;chr1;chr1;chr1;chr1;chr1;chr1;chr1;chr1;chr1;chr1;chr1;chr1;chr1;chr1;chr1;chr1;chr1;chr1;chr1;chr1;chr1;chr1;chr1;chr1;chr1;chr1;chr1;chr1;chr1;chr1;chr1;chr1;chr1;chr1;chr1;chr1;chr1;chr1;chr1;chr1;chr1;chr1;chr1;chr1;chr1;chr1;chr1;chr1;chr1;chr1;chr1;chr1;chr1;chr1;chr1;chr1;chr1;chr1;chr1;chr1;chr1;chr1;chr1;chr1;chr1;chr1;chr1;chr1;chr1…	1280436;1280472;1280588;1281224;1281226;1281226;1281411;1281411;1281411;1281925;1282109;1282117;1282164;1282242;1282242;1282242;1282242;1282276;1283978;1283978;1283978;1283978;1283978;1283978;1283978;1285571;1285571;1285571;1285926;1285926;1285926;1285926;1285926;1285926;1286768;1286768;1286768;1286768;1286768;1287109;1287109;1287109;1287109;1287109;1287109;1287508;1287508;1287508;1287508;1287508…	1280666;1280666;1281610;1281297;1281297;1281297;1281610;1281610;1281610;1282010;1282315;1282319;1282187;1282315;1282315;1282315;1282315;1282315;1284090;1284090;1284090;1284090;1284090;1284090;1284090;1285597;1285664;1285664;1286278;1286168;1286278;1286278;1286278;1286278;1286975;1286975;1286975;1286975;1286975;1287299;1287299;1287299;1287299;1287299;1287299;1287836;1287596;1287596;1287596;1287596…	4025	4.33963517379083	4.88822384368833	4.74983364191774	4.83079477478604	4.7604135404417	5.18407755014072	5.58367315386047	5.39962633946357	4.86958772347916	5.31772549318675	4.71204617723002	4.92476532071743	1.46265414056249	1.05772246751145	1.34132980522658	0.880230450266631	1.36427810996648	1.15887032697858
ENSG00000131584.18	ACAP3	gene_type protein_coding	chr1;chr1;chr1;chr1;chr1;chr1;chr1;chr1;chr1;chr1;chr1;chr1;chr1;chr1;chr1;chr1;chr1;chr1;chr1;chr1;chr1;chr1;chr1;chr1;chr1;chr1;chr1;chr1;chr1;chr1;chr1;chr1;chr1;chr1;chr1;chr1;chr1;chr1;chr1;chr1;chr1;chr1;chr1;chr1;chr1;chr1;chr1;chr1;chr1;chr1;chr1;chr1;chr1;chr1;chr1;chr1;chr1;chr1;chr1;chr1;chr1;chr1;chr1;chr1;chr1;chr1;chr1;chr1;chr1;chr1;chr1;chr1;chr1;chr1;chr1;chr1;chr1;chr1;chr1;chr1…	1292376;1292390;1292870;1293564;1293823;1293823;1293823;1293823;1294090;1294090;1294090;1294090;1294402;1294402;1294402;1294402;1294499;1294718;1294718;1294718;1295447;1295447;1295447;1295447;1295736;1295736;1295736;1295736;1296015;1296015;1296015;1296015;1296211;1296211;1296211;1296211;1296425;1296425;1296425;1296425;1296436;1296466;1297822;1297822;1297822;1297822;1297822;1297822;1297837;1298013…	1293708;1293708;1293708;1293708;1293933;1293933;1293933;1293933;1294199;1294199;1294199;1294199;1294628;1294628;1294628;1294628;1294628;1295008;1294816;1294816;1295554;1295554;1295554;1295554;1295938;1295938;1295938;1295938;1296109;1296109;1296109;1296109;1296280;1296280;1296280;1296280;1296633;1296633;1296633;1296633;1296633;1296633;1297933;1297933;1297933;1297933;1297933;1297933;1297933;1298241…	8809	8.51583645750966	9.47735117893759	8.711774864295	8.98835476013703	9.25653990026351	9.62311534204333	9.51978321844451	9.79451698713103	9.54034070987511	9.31377702947079	8.8530144272363	8.97020208416738	1.94735339667027	1.21131987997252	1.28928878120169	1.20977082055538	0.854668182265627	1.08461848019412
ENSG00000278073.1	MIR6726	gene_type miRNA	chr1	1296110	1296170	61	3.55782624462725	3.55782624462725	3.55782624462725	3.55782624462725	3.55782624462725	3.55782624462725	3.55782624462725	3.55782624462725	3.55782624462725	3.55782624462725	3.55782624462725	3.55782624462725	1	1	1	1	1	1
ENSG00000169972.11	PUSL1	gene_type protein_coding	chr1;chr1;chr1;chr1;chr1;chr1;chr1;chr1;chr1;chr1;chr1;chr1;chr1;chr1;chr1;chr1;chr1;chr1;chr1;chr1;chr1;chr1;chr1;chr1;chr1;chr1	1308567;1308611;1308788;1308821;1308915;1309086;1309086;1309086;1309086;1309235;1309454;1309454;1309454;1309454;1309681;1309681;1309706;1310036;1310634;1310634;1310634;1310909;1310909;1310909;1311330;1311330	1308720;1308720;1308972;1308972;1308972;1309273;1309840;1309273;1309273;1309273;1309603;1309814;1309603;1309603;1309851;1309851;1309851;1311071;1310688;1310688;1310688;1311069;1311028;1311071;1311676;1311677	2489	8.13375383452623	8.557880550883	8.23812734926835	8.5969015108901	8.35091507214426	8.70115805465623	8.35057901574124	8.66826442217062	8.56089355082797	8.86100693712969	7.93984321353363	8.10661888155338	1.34176007063371	1.28233585117656	1.27477531026713	1.24632939049515	1.23124117696696	1.12254685798898
ENSG00000127054.20	INTS11	gene_type protein_coding	chr1;chr1;chr1;chr1;chr1;chr1;chr1;chr1;chr1;chr1;chr1;chr1;chr1;chr1;chr1;chr1;chr1;chr1;chr1;chr1;chr1;chr1;chr1;chr1;chr1;chr1;chr1;chr1;chr1;chr1;chr1;chr1;chr1;chr1;chr1;chr1;chr1;chr1;chr1;chr1;chr1;chr1;chr1;chr1;chr1;chr1;chr1;chr1;chr1;chr1;chr1;chr1;chr1;chr1;chr1;chr1;chr1;chr1;chr1;chr1;chr1;chr1;chr1;chr1;chr1;chr1;chr1;chr1;chr1;chr1;chr1;chr1;chr1;chr1;chr1;chr1;chr1;chr1;chr1;chr1…	1311585;1311585;1311585;1311585;1311585;1311597;1311598;1311600;1311601;1311602;1311606;1311606;1311606;1311606;1311627;1311819;1311823;1312018;1312018;1312018;1312018;1312018;1312018;1312018;1312018;1312018;1312018;1312018;1312018;1312018;1312018;1312018;1312018;1312018;1312080;1312226;1312226;1312226;1312226;1312226;1312226;1312226;1312226;1312226;1312226;1312226;1312226;1312226;1312226;1312226…	1311924;1311924;1311924;1311924;1311924;1311924;1311924;1311924;1311924;1311924;1311924;1311924;1311924;1311924;1311924;1311924;1311924;1312147;1312147;1312147;1312147;1312147;1312147;1312147;1312147;1312147;1312147;1312147;1312147;1312147;1312147;1312147;1312147;1312147;1312147;1312501;1312368;1312368;1312368;1312368;1312368;1312368;1312501;1312368;1312368;1312368;1312700;1312368;1312356;1312368…	8220	9.95640966580567	10.2596626957202	10.0019450167971	10.1662941977654	10.1636137543608	10.2979509356368	10.0726059529991	10.4088739967528	10.4010990227112	10.3008632797987	9.57661979689647	9.58823426032342	1.23392356495006	1.12066041907641	1.09758843185785	1.26248657246594	0.932880542170364	1.00808302525141
ENSG00000283712.1	MIR6727	gene_type miRNA	chr1	1312502	1312566	65	3.55782624462725	3.55782624462725	3.55782624462725	3.55782624462725	3.55782624462725	3.55782624462725	3.55782624462725	3.55782624462725	3.55782624462725	3.55782624462725	3.55782624462725	3.55782624462725	1	1	1	1	1	1
ENSG00000240731.1	RP5-890O3.9	gene_type sense_intronic	chr1;chr1	1317581;1318623	1317899;1318689	386	4.98011786242065	5.78288778289661	5.52556260901224	5.47016231965307	5.389325411389	6.12419056838761	5.37282041029262	5.88134483726386	5.67724931999646	5.82690800823502	5.10550763931515	5.63663897880059	1.74444718671012	0.962327399234561	1.66424191204201	1.42259443691039	1.10930700196405	1.44506194689834
ENSG00000224051.6	CPTP	gene_type protein_coding	chr1;chr1;chr1;chr1;chr1;chr1;chr1;chr1	1324756;1324767;1325241;1326836;1326836;1327241;1327241;1327241	1325102;1325102;1325595;1327032;1327032;1328897;1327471;1327994	2556	8.00008255463155	8.75628796006644	8.43246371671857	8.57649602549867	8.80371823126212	8.99713660579646	8.75376101975506	9.09404483160145	9.07634410758237	8.85175246881126	8.21581576476606	8.33222463277493	1.6890422371412	1.10498923046915	1.14346988803496	1.26600562238119	0.855837239927013	1.08403314449512
ENSG00000169962.4	TAS1R3	gene_type protein_coding	chr1;chr1;chr1;chr1;chr1;chr1	1331314;1331638;1332024;1332921;1333259;1333506	1331536;1331938;1332806;1333124;1333379;1335306	3433	4.2369208620727	4.71959819811634	4.53994339918289	4.76204181669927	4.7604135404417	4.79088638399139	5.25214772098662	4.92614825130183	4.86958772347916	4.7764253630922	4.38456570337338	4.66234229816799	1.39733441801125	1.16642893831846	1.02134681745299	0.797745533049466	0.937465588476286	1.21232507272907
ENSG00000107404.19	DVL1	gene_type protein_coding	chr1;chr1;chr1;chr1;chr1;chr1;chr1;chr1;chr1;chr1;chr1;chr1;chr1;chr1;chr1;chr1;chr1;chr1;chr1;chr1;chr1;chr1;chr1;chr1;chr1;chr1;chr1;chr1;chr1;chr1;chr1;chr1;chr1;chr1;chr1;chr1;chr1;chr1;chr1;chr1;chr1;chr1;chr1;chr1;chr1;chr1;chr1;chr1;chr1;chr1;chr1;chr1;chr1;chr1;chr1;chr1;chr1;chr1;chr1;chr1;chr1;chr1;chr1;chr1;chr1	1335276;1335276;1335279;1336412;1337018;1337023;1337977;1337977;1337977;1337977;1337977;1338269;1338269;1338269;1338269;1338269;1338334;1338522;1338522;1338522;1338522;1338522;1339287;1339287;1339287;1339362;1339362;1339492;1339582;1339582;1339582;1339736;1339736;1339736;1339736;1340038;1340038;1340038;1340038;1340038;1340247;1340247;1340247;1340410;1340410;1340459;1341667;1341667;1341667;1341770…	1336515;1336515;1336515;1336515;1337055;1337055;1338183;1338183;1338183;1338183;1338183;1338436;1338372;1338436;1338436;1338436;1338436;1338653;1338653;1338653;1338653;1338653;1339649;1339422;1339439;1339439;1339439;1339812;1339649;1339649;1339649;1339812;1339812;1339812;1339812;1340177;1340190;1340052;1340177;1340177;1340365;1340316;1340316;1340503;1340503;1340503;1341805;1341805;1341805;1342156…	3814	8.99340416596096	10.2416360712372	9.48427243265553	10.1163233578716	9.63836964959122	10.2045287920075	9.84569576769022	10.3653703038369	9.89225953200851	9.87883104796134	9.09251964296381	9.42179416383359	2.37550115017553	1.54976656565135	1.48057661009119	1.43363179229665	0.990735268702359	1.2563814268876
ENSG00000284372.1	MIR6808	gene_type miRNA	chr1	1339650	1339708	59	3.55782624462725	3.55782624462725	3.55782624462725	3.55782624462725	3.55782624462725	3.55782624462725	3.55782624462725	3.55782624462725	3.55782624462725	3.55782624462725	3.55782624462725	3.55782624462725	1	1	1	1	1	1
ENSG00000162576.16	MXRA8	gene_type protein_coding	chr1;chr1;chr1;chr1;chr1;chr1;chr1;chr1;chr1;chr1;chr1;chr1;chr1;chr1;chr1;chr1;chr1;chr1;chr1;chr1;chr1;chr1;chr1;chr1;chr1;chr1;chr1;chr1;chr1;chr1;chr1;chr1;chr1;chr1;chr1;chr1;chr1;chr1;chr1;chr1;chr1;chr1;chr1;chr1;chr1;chr1;chr1;chr1;chr1;chr1;chr1;chr1;chr1;chr1;chr1;chr1;chr1;chr1;chr1	1352689;1352689;1352691;1352692;1352692;1353192;1353215;1353439;1353848;1353848;1353848;1353848;1353848;1353848;1354030;1354030;1354030;1354030;1354030;1354030;1354030;1354030;1354193;1354193;1354193;1354193;1354193;1354193;1354193;1354193;1354354;1354354;1354354;1354354;1354354;1354682;1354682;1354682;1354682;1354682;1355004;1355083;1355244;1355244;1355244;1355244;1355244;1355450;1355450;1355450…	1353629;1353629;1353629;1353629;1353332;1353928;1353928;1353629;1353928;1353928;1353946;1353928;1353928;1353928;1354106;1354106;1354106;1354106;1354106;1354106;1354106;1354106;1354509;1354247;1354232;1354232;1354232;1354232;1354232;1354264;1354474;1354509;1354509;1354509;1354509;1355016;1355152;1355152;1355152;1355152;1355345;1355152;1355512;1355345;1355345;1355345;1355345;1355512;1355752;1355752…	3622	4.33963517379083	5.3133683560221	4.61539758452791	4.95589460197784	4.8290842810492	5.14664629201116	5.29372603494378	5.60885875383289	4.86958772347916	5.00489975279983	4.71204617723002	4.98112808775494	1.96391594249868	1.26619273014193	1.24622279498012	1.24412609982701	1.09833033744994	1.20504073050464
ENSG00000175756.13	AURKAIP1	gene_type protein_coding	chr1;chr1;chr1;chr1;chr1;chr1;chr1;chr1;chr1;chr1;chr1;chr1;chr1;chr1;chr1;chr1;chr1;chr1;chr1	1373730;1373730;1373732;1373737;1374000;1374000;1374000;1374000;1374244;1374438;1374705;1374705;1374705;1374705;1374705;1374997;1374997;1375075;1375154	1373902;1373902;1373902;1373902;1374445;1374445;1374445;1374445;1374790;1374590;1375159;1374790;1374790;1374790;1375157;1375144;1375173;1375169;1375495	1669	11.0313939951108	10.8512505032012	11.1066444405319	11.0568546807347	10.9616538238586	10.9446921288513	10.5905287098943	10.895994932166	11.0734683617074	11.1350207591189	10.7259127869807	10.4525397820572	0.882615206122753	0.966077102575359	0.988311891819136	1.23581794033672	1.04358809931478	0.827382870805466
ENSG00000223663.2	NDUFB4P8	gene_type processed_pseudogene	chr1	1378666	1379032	367	3.55782624462725	4.11690410408451	3.96520609223261	3.55782624462725	3.55782624462725	3.9399101021215	3.97903344337653	3.95050242154829	3.55782624462725	3.55782624462725	3.97541602041241	3.55782624462725	1.47332719628631	0.753991493562934	1.30322289775605	0.980418068928156	1	0.748674345507322
ENSG00000221978.11	CCNL2	gene_type protein_coding	chr1;chr1;chr1;chr1;chr1;chr1;chr1;chr1;chr1;chr1;chr1;chr1;chr1;chr1;chr1;chr1;chr1;chr1;chr1;chr1;chr1;chr1;chr1;chr1;chr1;chr1;chr1;chr1;chr1;chr1;chr1;chr1;chr1;chr1;chr1;chr1;chr1;chr1;chr1;chr1;chr1;chr1;chr1;chr1;chr1;chr1;chr1;chr1;chr1;chr1;chr1;chr1;chr1;chr1;chr1;chr1;chr1;chr1;chr1;chr1;chr1;chr1;chr1;chr1;chr1;chr1;chr1;chr1;chr1;chr1;chr1;chr1;chr1;chr1;chr1;chr1;chr1;chr1;chr1;chr1…	1385711;1386482;1386495;1386495;1386499;1386502;1386503;1386708;1386713;1387122;1387232;1387543;1387777;1387777;1387777;1387777;1387777;1387777;1387777;1387777;1387777;1387777;1387777;1387777;1387954;1387954;1387954;1387954;1387954;1387954;1387954;1387954;1387954;1387954;1387954;1387954;1388023;1388492;1388492;1388492;1388626;1388626;1388626;1388626;1388626;1388816;1388950;1388950;1389346;1390230…	1387582;1387582;1387582;1387582;1387582;1387582;1387582;1387582;1387582;1387582;1387582;1387582;1387869;1387869;1387869;1387869;1387869;1387869;1387869;1387869;1387869;1387869;1387869;1387869;1388065;1388065;1388065;1388065;1388065;1388065;1388065;1388065;1388065;1388713;1388065;1388065;1388065;1388510;1388510;1388510;1388743;1388743;1388743;1388743;1388743;1388830;1389047;1389047;1389473;1390371…	6850	10.1250063563141	10.6956009494709	10.2108500346203	10.4457260855072	10.3000605552012	10.4751474750531	10.4104113999736	10.4383817524979	10.1120666492017	9.97426342708815	9.61917233261474	9.76172905408189	1.48513552911772	1.17680562764551	1.12903242498519	1.01957673041563	0.908902078636059	1.10385962616175
ENSG00000224870.6	RP4-758J18.2	gene_type processed_transcript	chr1;chr1;chr1;chr1;chr1;chr1;chr1;chr1;chr1;chr1;chr1;chr1;chr1;chr1;chr1;chr1;chr1;chr1	1399522;1399527;1399530;1399552;1399562;1399572;1399806;1399981;1400158;1400158;1400158;1400158;1400419;1400605;1400605;1400605;1400605;1401243	1399689;1399685;1400303;1399685;1399689;1399689;1402033;1400303;1400608;1400544;1400303;1400303;1400472;1402006;1401087;1402026;1402046;1402046	2525	8.11077766798072	8.31556640437548	8.19216743941434	8.27084703572945	8.27209535089054	8.41865504189429	8.19977387243283	8.59147873985332	8.57531773688944	8.20188963916532	7.84927980283033	8.07367530539876	1.15251756348908	1.05605106418782	1.10692670007115	1.31194284257726	0.771946035904009	1.16828762682766
ENSG00000242485.5	MRPL20	gene_type protein_coding	chr1;chr1;chr1;chr1;chr1;chr1;chr1;chr1;chr1;chr1;chr1;chr1;chr1;chr1;chr1;chr1;chr1;chr1;chr1	1401908;1401913;1401913;1402182;1405109;1405809;1405809;1405809;1405809;1406226;1406249;1406909;1406909;1406909;1406909;1407131;1407131;1407131;1407131	1402256;1402256;1402256;1402601;1405886;1405886;1407019;1405886;1405886;1406307;1406346;1407019;1407019;1406998;1407019;1407290;1407235;1407268;1407313	2788	10.562943379771	10.2458979426282	10.4596816931243	10.4264897503347	10.3283005419109	10.3748961062374	9.90166911898251	10.2082991233098	10.5508102886769	10.6368637401853	9.9192849245011	9.71094552883134	0.802712107199114	0.977255739158976	1.03282481175772	1.23681524256988	1.06146253515589	0.865532923950043
ENSG00000264293.2	RN7SL657P	gene_type misc_RNA	chr1	1405460	1405752	293	3.55782624462725	3.55782624462725	3.55782624462725	3.55782624462725	3.55782624462725	3.55782624462725	3.55782624462725	3.55782624462725	3.55782624462725	3.55782624462725	3.55782624462725	3.55782624462725	1	1	1	1	1	1
ENSG00000272455.1	RP4-758J18.13	gene_type lincRNA	chr1	1409096	1410618	1523	6.375254380236	7.23526107486633	6.47750147898021	7.04708358194384	6.76760318501576	7.25032731539463	6.53646616295147	7.07561057753431	7.12029113720487	7.59383336574389	6.17604816523491	6.44590687510515	1.81504673309254	1.48409361964076	1.39737974179332	1.45311049946752	1.38851448605055	1.2056897428583
ENSG00000235098.8	ANKRD65	gene_type protein_coding	chr1;chr1;chr1;chr1;chr1;chr1;chr1;chr1;chr1;chr1;chr1;chr1;chr1;chr1;chr1	1418420;1418420;1418422;1418880;1419138;1420052;1420052;1420797;1420797;1420797;1420797;1420816;1421133;1421133;1421133	1419549;1419549;1419549;1419549;1419549;1420592;1420592;1421091;1421260;1421005;1421005;1421005;1421769;1421444;1421444	2644	3.55782624462725	4.11690410408451	3.55782624462725	4.17289735623919	3.99376167689582	3.9399101021215	3.97903344337653	3.55782624462725	3.96574265195466	3.55782624462725	3.55782624462725	3.55782624462725	1.47332719628631	1.53163349069426	0.963361000009112	0.746799466090436	0.753711125063102	1
ENSG00000225905.1	RP4-758J18.7	gene_type antisense	chr1;chr1	1420245;1422469	1420564;1422691	543	3.55782624462725	3.95438272415751	3.55782624462725	3.55782624462725	3.55782624462725	3.55782624462725	4.1514250525846	3.55782624462725	3.55782624462725	3.55782624462725	3.55782624462725	3.55782624462725	1.3163621772543	1	1	0.662687766517553	1	1
ENSG00000205116.3	TMEM88B	gene_type protein_coding	chr1;chr1	1426128;1427554	1426385;1427787	492	3.55782624462725	3.95438272415751	3.55782624462725	3.55782624462725	3.55782624462725	3.55782624462725	3.55782624462725	3.55782624462725	3.55782624462725	3.55782624462725	3.55782624462725	3.55782624462725	1.3163621772543	1	1	1	1	1
ENSG00000225285.1	LINC01770	gene_type lincRNA	chr1;chr1;chr1;chr1;chr1;chr1;chr1;chr1	1430539;1430550;1430550;1430664;1431805;1434178;1434178;1434188	1430662;1430662;1430954;1430954;1431843;1434520;1434488;1434573	851	4.2369208620727	4.11690410408451	4.13206609265227	4.30835738787737	4.30730794355666	4.40257149830365	4.1514250525846	4.57853741794673	4.54119739532673	3.55782624462725	3.97541602041241	4.29078246946898	0.92017696201517	1.12997534538463	1.06826054244142	1.3445397105368	0.505796461534178	1.24432767628636
ENSG00000179403.11	VWA1	gene_type protein_coding	chr1;chr1;chr1;chr1;chr1;chr1;chr1;chr1;chr1;chr1	1434861;1435523;1435671;1435735;1436807;1436927;1436927;1437322;1439081;1439081	1435146;1435821;1435821;1435821;1437177;1437484;1437459;1437484;1440765;1442882	5065	8.55378245240819	9.43877239776323	8.56453100724022	8.89589524313642	9.03894860151108	9.3838716689183	9.3242666281899	9.70780846575815	9.8016933860734	9.59637434284277	9.04444187069657	9.09567333309585	1.84675175075682	1.25820258899585	1.27008325276902	1.30454059372677	0.867346857461461	1.03614898738837
ENSG00000215915.9	ATAD3C	gene_type protein_coding	chr1;chr1;chr1;chr1;chr1;chr1;chr1;chr1;chr1;chr1;chr1;chr1;chr1;chr1;chr1;chr1;chr1;chr1;chr1;chr1	1449689;1449914;1450681;1452046;1452046;1452365;1452365;1454345;1455460;1455460;1455791;1455791;1456225;1457129;1459161;1460750;1462483;1462600;1468384;1468384	1450758;1450041;1450758;1452122;1452122;1452434;1452434;1454500;1455519;1455519;1455902;1455916;1456349;1457180;1459231;1460917;1462708;1462708;1468663;1470158	3976	4.11398763489342	4.24046069271801	3.96520609223261	4.60791311011023	4.51847424846376	4.5518999672019	4.4868859099821	4.3361324333863	4.25976969624512	4.71030396550859	4.14636171533227	4.15839371305164	1.09162175973012	1.56125589358985	1.02343942756446	0.900779889265218	1.3665462323462	1.00837481952175
ENSG00000160072.19	ATAD3B	gene_type protein_coding	chr1;chr1;chr1;chr1;chr1;chr1;chr1;chr1;chr1;chr1;chr1;chr1;chr1;chr1;chr1;chr1;chr1;chr1;chr1;chr1;chr1;chr1;chr1;chr1;chr1;chr1;chr1;chr1;chr1;chr1;chr1;chr1;chr1;chr1;chr1;chr1;chr1;chr1;chr1;chr1;chr1;chr1;chr1;chr1;chr1;chr1;chr1;chr1;chr1	1471769;1477274;1478026;1478644;1479049;1479049;1479049;1480867;1480867;1480867;1482138;1482138;1482138;1482545;1482545;1482545;1483485;1484569;1485016;1485016;1485782;1485782;1485782;1485782;1486110;1486110;1486110;1486544;1486544;1486544;1486544;1487863;1487863;1487863;1489204;1489204;1489204;1489204;1489692;1490257;1490257;1490257;1490563;1490563;1490563;1495485;1495485;1495485;1495485	1472089;1477350;1478745;1478745;1479108;1479108;1479108;1480936;1480936;1480936;1482303;1482303;1482303;1482662;1482614;1482614;1485171;1485171;1485171;1485171;1486235;1485838;1485838;1485838;1486235;1486235;1486235;1486668;1486668;1486668;1486668;1487914;1487914;1487914;1490671;1489274;1489274;1489274;1489811;1490424;1490424;1490424;1490671;1490671;1490671;1496201;1496202;1497848;1496202	7682	7.41526135210108	8.68583443963029	7.60641602537002	8.58060032086575	7.76056121460181	8.58099195008153	8.12324439184678	8.87943990934806	7.92398951075528	8.21639724403635	6.76442942698626	7.55003705144476	2.4125738214225	1.96453013124539	1.76593315632969	1.6890306608345	1.22468246224104	1.72381819254449
ENSG00000197785.13	ATAD3A	gene_type protein_coding	chr1;chr1;chr1;chr1;chr1;chr1;chr1;chr1;chr1;chr1;chr1;chr1;chr1;chr1;chr1;chr1;chr1;chr1;chr1;chr1;chr1;chr1;chr1;chr1;chr1;chr1;chr1;chr1;chr1;chr1;chr1;chr1;chr1;chr1;chr1;chr1;chr1;chr1;chr1;chr1;chr1;chr1;chr1;chr1;chr1;chr1;chr1;chr1;chr1;chr1;chr1;chr1;chr1;chr1;chr1;chr1;chr1;chr1;chr1;chr1;chr1;chr1;chr1;chr1;chr1;chr1;chr1;chr1;chr1;chr1;chr1;chr1;chr1;chr1;chr1;chr1;chr1	1512151;1512175;1512530;1512530;1516012;1516012;1516012;1516012;1517070;1517167;1517311;1517311;1517311;1517621;1517716;1517716;1517716;1517716;1517716;1518921;1518921;1518921;1518921;1518921;1520141;1520141;1520141;1520141;1520141;1520548;1520548;1520548;1520548;1520548;1522744;1522744;1522744;1522744;1522744;1523511;1523511;1523511;1523511;1523839;1523839;1523839;1523839;1524273;1524273;1524273…	1512473;1512473;1512690;1512690;1516088;1516088;1516088;1516088;1517412;1517412;1517412;1517412;1517412;1517775;1517775;1517775;1517775;1517775;1517775;1518990;1518990;1518990;1518990;1518990;1520306;1520306;1520306;1520306;1520306;1520617;1520617;1520617;1520617;1520617;1522780;1522899;1522899;1522899;1522899;1523567;1523567;1523567;1523567;1523964;1523964;1523964;1523964;1524397;1524397;1524397…	3069	9.2976473731804	9.77739475681144	9.46123502028994	9.91506289970296	9.48971948666161	9.83089269106829	9.09534682868409	9.73481881450295	9.64994650745128	9.68411627215512	9.02530310837001	9.09020091852192	1.39449946766292	1.36966956192793	1.26678633007897	1.55775892838687	1.02396738555369	1.04601084549528
ENSG00000205090.8	TMEM240	gene_type protein_coding	chr1;chr1;chr1;chr1;chr1;chr1;chr1;chr1;chr1;chr1;chr1	1535174;1535207;1535589;1535589;1539056;1539684;1539684;1540290;1540290;1540290;1540420	1535507;1535507;1535797;1535797;1539790;1539790;1539790;1540350;1540355;1540357;1540453	1380	4.42933801147896	3.55782624462725	3.96520609223261	4.42132383357474	4.30730794355666	4.40257149830365	4.39158453445309	4.64593913043284	4.61674007229362	4.14543931115403	3.55782624462725	3.55782624462725	0.546573808359092	1.37184524316493	1.06826054244142	1.19280201177512	0.72131395418323	1
ENSG00000160075.11	SSU72	gene_type protein_coding	chr1;chr1;chr1;chr1;chr1;chr1;chr1;chr1;chr1;chr1;chr1;chr1;chr1	1541673;1541674;1543869;1543869;1544638;1544863;1544863;1560848;1564773;1564773;1574478;1574478;1574478	1542167;1542167;1543987;1543987;1545002;1546487;1545002;1564916;1564916;1564916;1574584;1574587;1574869	6925	10.8604324398644	10.9544576602948	10.966465341597	11.089594046255	10.8149190939937	10.9960691676211	10.8400783381996	11.1253324121214	10.9482667607666	10.9971137369984	10.5333316594629	10.3882426097195	1.06734399661918	1.08909417047742	1.13378734673215	1.21862485756078	1.03443785495211	0.904323556847882
ENSG00000215014.4	RP5-832C2.5	gene_type lincRNA	chr1	1574975	1577075	2101	5.02618270918522	4.77901403647871	5.42675688775613	5.12005160275531	5.16778017850539	5.10796161153328	4.78830407589882	5.064039081779	4.81218729988587	4.89686259953378	4.64091134249155	4.86525230716655	0.842548317198744	0.808486010163525	0.959384763767093	1.21061069864254	1.06044904440221	1.16824346313403
ENSG00000274481.1	RP11-345P4.11	gene_type processed_pseudogene	chr1	1583510	1583909	400	3.55782624462725	3.55782624462725	3.55782624462725	3.55782624462725	3.55782624462725	3.55782624462725	3.55782624462725	3.55782624462725	3.55782624462725	3.55782624462725	3.55782624462725	3.55782624462725	1	1	1	1	1	1
ENSG00000228594.3	FNDC10	gene_type protein_coding	chr1	1598012	1600096	2085	8.63647627600522	9.95580519091374	9.16826383152675	9.73911577481221	9.53889086236934	9.93743225484423	9.60092718368449	10.120003320664	10.158272213053	10.0107358110835	8.88976444207041	9.28480069157716	2.49550001914679	1.48540047347492	1.31817452325496	1.43303727567693	0.902790785152716	1.314975800192
ENSG00000272106.1	RP11-345P4.9	gene_type antisense	chr1	1613758	1615795	2038	7.04834765220769	7.33518890667431	6.96030309887241	7.04708358194384	7.36319433297437	7.42877218871265	7.35074291389326	7.58686398815301	7.61681213051666	7.52540895358675	6.8548569350738	6.85198947360546	1.21996626509553	1.06199758326123	1.0465040216112	1.17782163092623	0.938609405981707	0.998014401082752
ENSG00000197530.12	MIB2	gene_type protein_coding	chr1;chr1;chr1;chr1;chr1;chr1;chr1;chr1;chr1;chr1;chr1;chr1;chr1;chr1;chr1;chr1;chr1;chr1;chr1;chr1;chr1;chr1;chr1;chr1;chr1;chr1;chr1;chr1;chr1;chr1;chr1;chr1;chr1;chr1;chr1;chr1;chr1;chr1;chr1;chr1;chr1;chr1;chr1;chr1;chr1;chr1;chr1;chr1;chr1;chr1;chr1;chr1;chr1;chr1;chr1;chr1;chr1;chr1;chr1;chr1;chr1;chr1;chr1;chr1;chr1;chr1;chr1;chr1;chr1;chr1;chr1;chr1;chr1;chr1;chr1;chr1;chr1;chr1;chr1;chr1…	1615415;1615421;1615437;1615443;1615454;1615496;1615514;1615516;1615530;1615879;1615887;1615905;1615914;1615968;1616274;1616310;1616311;1616508;1616508;1616508;1616508;1616508;1616508;1616508;1616508;1616508;1616508;1616508;1616508;1616508;1616508;1617078;1617408;1617560;1617577;1623122;1623389;1623389;1623389;1623389;1623389;1623389;1623389;1623389;1623431;1623431;1623431;1623431;1623431;1623431…	1615633;1615633;1615633;1615633;1615633;1615633;1615633;1615633;1615633;1616100;1616100;1616100;1616100;1616100;1616614;1616614;1616614;1617898;1616614;1616614;1616614;1616614;1619210;1616614;1616614;1616614;1616614;1616614;1616614;1616614;1616614;1617323;1617515;1617715;1617715;1623482;1623699;1623699;1623699;1623699;1623482;1623699;1623699;1623699;1623699;1623699;1623699;1623699;1623679;1623699…	8767	7.41526135210108	8.33572515360046	7.60641602537002	7.87553882400773	8.02400908160906	8.26716572262825	8.38593370934155	8.69908831883957	8.49033327323522	8.37133799972656	7.79853647584978	7.86481226791271	1.89272367357413	1.20507488362649	1.18357952225545	1.24242142139769	0.920828713976908	1.04701041405759
ENSG00000189409.13	MMP23B	gene_type protein_coding	chr1;chr1;chr1;chr1;chr1;chr1;chr1;chr1;chr1;chr1;chr1;chr1;chr1;chr1;chr1;chr1;chr1;chr1;chr1;chr1;chr1;chr1;chr1;chr1;chr1;chr1;chr1;chr1;chr1;chr1;chr1;chr1;chr1;chr1;chr1;chr1;chr1;chr1;chr1;chr1;chr1;chr1;chr1;chr1;chr1;chr1;chr1;chr1	1632095;1632163;1632178;1632179;1632710;1632783;1632783;1632783;1632783;1632981;1632981;1632981;1632981;1633188;1633188;1633188;1633203;1633203;1633679;1633748;1633748;1633748;1633748;1633748;1633989;1633989;1633989;1633989;1633989;1634002;1634202;1634202;1634202;1634202;1634202;1634202;1634202;1634240;1634451;1634451;1634451;1634451;1634451;1634451;1634451;1634451;1634451;1635159	1632374;1632374;1632374;1632374;1632913;1632913;1632913;1632913;1632913;1633355;1633120;1633120;1633120;1633355;1634099;1633355;1633480;1633355;1633912;1633912;1633912;1634099;1633912;1633912;1634099;1634099;1634099;1634099;1634099;1634328;1634328;1634328;1634328;1634328;1634328;1634328;1634328;1634328;1634786;1634604;1634608;1634568;1634568;1634651;1634654;1634474;1634654;1635263	2273	3.55782624462725	4.24046069271801	3.96520609223261	3.55782624462725	3.99376167689582	3.9399101021215	3.55782624462725	3.55782624462725	3.55782624462725	3.97475709050258	3.55782624462725	3.55782624462725	1.60506803171848	0.753991493562934	0.963361000009112	1	1.33508430584895	1
ENSG00000248333.8	CDK11B	gene_type protein_coding	chr1;chr1;chr1;chr1;chr1;chr1;chr1;chr1;chr1;chr1;chr1;chr1;chr1;chr1;chr1;chr1;chr1;chr1;chr1;chr1;chr1;chr1;chr1;chr1;chr1;chr1;chr1;chr1;chr1;chr1;chr1;chr1;chr1;chr1;chr1;chr1;chr1;chr1;chr1;chr1;chr1;chr1;chr1;chr1;chr1;chr1;chr1;chr1;chr1;chr1;chr1;chr1;chr1;chr1;chr1;chr1;chr1;chr1;chr1;chr1;chr1;chr1;chr1;chr1;chr1;chr1;chr1;chr1;chr1;chr1;chr1;chr1;chr1;chr1;chr1;chr1;chr1;chr1;chr1;chr1…	1635227;1635587;1635738;1635738;1635738;1635738;1635738;1635738;1635937;1635937;1635937;1635937;1635937;1635937;1635937;1635937;1636333;1636333;1636333;1636333;1636333;1636333;1636333;1636333;1636682;1636682;1636682;1636682;1636682;1636682;1636682;1636682;1636897;1636897;1636897;1636897;1636897;1636897;1636897;1636897;1637081;1637081;1637081;1637081;1637081;1637081;1637081;1637081;1637408;1637408…	1635856;1635856;1635856;1635856;1635856;1635856;1635856;1635856;1636126;1636126;1636126;1636126;1636126;1636126;1636126;1636126;1636481;1636481;1636481;1636481;1636481;1636481;1636481;1636481;1636798;1636798;1636798;1636798;1636798;1636798;1636798;1636798;1637004;1637004;1637004;1637004;1637004;1637004;1637004;1637004;1637202;1637202;1637202;1637202;1637202;1637202;1637202;1637202;1637513;1637513…	3488	9.20752446468986	9.28362813460591	9.16351348019214	9.36646358493799	9.19916992621926	9.35119901581795	9.0242614405213	9.22895821716699	9.25487565569103	9.22579850560695	8.69931031921569	8.6022071683666	1.05416717145139	1.15104968186842	1.11113113258105	1.15244410246983	0.980047004590887	0.934908350611155
ENSG00000272004.1	RP11-345P4.10	gene_type antisense	chr1;chr1	1659325;1662331	1659452;1662602	400	3.55782624462725	4.11690410408451	3.96520609223261	3.99438106532615	3.55782624462725	3.55782624462725	3.97903344337653	3.55782624462725	3.96574265195466	3.55782624462725	3.55782624462725	3.55782624462725	1.47332719628631	1.02042841145107	1	0.746799466090436	0.753711125063102	1
ENSG00000189339.11	SLC35E2B	gene_type protein_coding	chr1;chr1;chr1;chr1;chr1;chr1;chr1;chr1;chr1;chr1;chr1;chr1;chr1;chr1;chr1;chr1;chr1;chr1;chr1;chr1;chr1;chr1;chr1;chr1;chr1;chr1;chr1;chr1;chr1;chr1;chr1;chr1;chr1;chr1	1659529;1661478;1661479;1663782;1668327;1668327;1668327;1668327;1669664;1669664;1669664;1670098;1670098;1670425;1671509;1671509;1675463;1675463;1675463;1675463;1676064;1676064;1676064;1676064;1676378;1676378;1676378;1676378;1690976;1690976;1692449;1692449;1692449;1692449	1660111;1666019;1666019;1666019;1668472;1668472;1668472;1668472;1670139;1669736;1669736;1670151;1670151;1671629;1671629;1671629;1675590;1675590;1675590;1675590;1676199;1676199;1676199;1676199;1676846;1676846;1676846;1676846;1691393;1691393;1692709;1692728;1692644;1692724	8395	8.91609205175982	10.4303993138094	9.24895692136751	10.2211735149233	9.67133938812644	10.289355379567	9.66881379455933	10.3528341909406	9.75021976407563	10.2060575469142	8.98057877738911	9.54888913117896	2.856616290507	1.96185252116654	1.53476310786849	1.60661070712434	1.37157905906567	1.48278595367713
ENSG00000269737.2	RP11-345P4.6	gene_type transcribed_processed_pseudogene	chr1;chr1;chr1	1671990;1673275;1674001	1673411;1673379;1674397	1819	4.58305459595839	5.38258088476974	4.74983364191774	5.06796559516205	4.68658471014338	5.41753951400342	4.90976689934899	5.18682391094459	4.92398302613155	5.10325960928617	4.38456570337338	4.80211492462791	1.74052952714335	1.24671521739851	1.65973717482139	1.21172054356195	1.13231596080517	1.33565667921868
ENSG00000215914.4	MMP23A	gene_type unprocessed_pseudogene	chr1;chr1;chr1;chr1;chr1;chr1;chr1	1699942;1700140;1700347;1700907;1701148;1701361;1701608	1700072;1700279;1700514;1701071;1701258;1701487;1701782	1017	3.95230142254003	3.55782624462725	4.13206609265227	3.99438106532615	3.55782624462725	3.55782624462725	4.28233509801111	3.55782624462725	3.96574265195466	3.55782624462725	3.55782624462725	3.55782624462725	0.760766076973291	0.908976544746804	1	0.60520304298605	0.753711125063102	1
ENSG00000008128.22	CDK11A	gene_type protein_coding	chr1;chr1;chr1;chr1;chr1;chr1;chr1;chr1;chr1;chr1;chr1;chr1;chr1;chr1;chr1;chr1;chr1;chr1;chr1;chr1;chr1;chr1;chr1;chr1;chr1;chr1;chr1;chr1;chr1;chr1;chr1;chr1;chr1;chr1;chr1;chr1;chr1;chr1;chr1;chr1;chr1;chr1;chr1;chr1;chr1;chr1;chr1;chr1;chr1;chr1;chr1;chr1;chr1;chr1;chr1;chr1;chr1;chr1;chr1;chr1;chr1;chr1;chr1;chr1;chr1;chr1;chr1;chr1;chr1;chr1;chr1;chr1;chr1;chr1;chr1;chr1;chr1;chr1;chr1;chr1…	1702730;1702766;1702881;1702881;1702881;1702881;1702881;1702881;1702881;1702881;1703080;1703080;1703080;1703080;1703080;1703080;1703080;1703080;1703080;1703080;1703088;1703088;1703476;1703476;1703476;1703476;1703476;1703476;1703476;1703476;1703476;1703476;1703476;1703604;1703824;1703824;1703824;1703824;1703824;1703824;1703824;1703824;1703824;1703824;1703824;1703868;1704039;1704039;1704039;1704039…	1702999;1702999;1702999;1702999;1702999;1702999;1702999;1702999;1702999;1702999;1703269;1703269;1703269;1703269;1703269;1703269;1703269;1703269;1703269;1703269;1703940;1703269;1703624;1703624;1703624;1703624;1703624;1703624;1703624;1703624;1703624;1703940;1703624;1703624;1703940;1703995;1703940;1703940;1703940;1703940;1703940;1703940;1703940;1703940;1703940;1703995;1704146;1704116;1704146;1704146…	4701	5.64432382019838	5.85466052716958	5.73005450660548	5.94252325882107	5.54158309041337	5.93465340053824	5.61563560197252	6.08830431571339	5.52782988782065	5.65877545461012	4.95429551510003	5.08584679014197	1.15695817195935	1.15866921321058	1.31318512228938	1.38767403064973	1.09501115499535	1.09547098644027
ENSG00000268575.1	RP1-283E3.8	gene_type processed_transcript	chr1;chr1;chr1;chr1;chr1;chr1;chr1;chr1;chr1;chr1;chr1;chr1;chr1;chr1;chr1;chr1;chr1;chr1;chr1;chr1	1702736;1703080;1703476;1703824;1704223;1704550;1704904;1705642;1707525;1708180;1708794;1709038;1709518;1712264;1716346;1719358;1721596;1722588;1734690;1735204	1702999;1703269;1703624;1703995;1704344;1704655;1705025;1705732;1707584;1708245;1708952;1709133;1709640;1712400;1716478;1719455;1721711;1722831;1734835;1737688	5079	5.30508727447148	6.12762719504381	5.8829533162791	5.77348802650204	5.74045014419768	6.08834624066722	6.06556639335921	6.3174274101107	5.70516250987532	5.23655356908095	5.46809978129595	5.42994975869744	1.76851679584137	0.926931549545493	1.27270327132659	1.19074213268766	0.722661058068028	0.973902989305446
ENSG00000227775.3	RP1-283E3.4	gene_type transcribed_processed_pseudogene	chr1;chr1;chr1;chr1;chr1;chr1;chr1;chr1	1724512;1724615;1730246;1732554;1735817;1735817;1735817;1736854	1724763;1724763;1731904;1732844;1735975;1735915;1735973;1737251	2759	5.15399644893704	6.28887249478205	5.64635390512537	5.64739931349451	5.77082375292175	6.19317122753041	6.21442609416122	6.00929340536513	6.20555407526214	5.9993742690352	5.53593409965896	5.35271171287847	2.1959969427643	1.00072488446545	1.340106329572	0.867458900802746	0.866829521929743	0.880733601422994
ENSG00000215790.6	SLC35E2	gene_type protein_coding	chr1;chr1;chr1;chr1;chr1;chr1;chr1;chr1;chr1;chr1;chr1;chr1;chr1;chr1;chr1;chr1	1724838;1731828;1732242;1734690;1734690;1734690;1735204;1738321;1738321;1738922;1738922;1739236;1739236;1744251;1745724;1745724	1725422;1732523;1732523;1734835;1734835;1734835;1735620;1738448;1738448;1739057;1739057;1739704;1739704;1744668;1745992;1745919	3264	6.26063944748196	6.72121490398983	5.70274850073552	6.66540885577204	6.61440037462118	6.42480944458852	6.31164956446411	6.68603206627615	6.2244349836912	6.25181527228491	6.04803837494208	5.81468545545703	1.37609059827533	1.94890038994483	0.876854314336174	1.29628460388205	1.01915980762731	0.850655612298852
ENSG00000008130.15	NADK	gene_type protein_coding	chr1;chr1;chr1;chr1;chr1;chr1;chr1;chr1;chr1;chr1;chr1;chr1;chr1;chr1;chr1;chr1;chr1;chr1;chr1;chr1;chr1;chr1;chr1;chr1;chr1;chr1;chr1;chr1;chr1;chr1;chr1;chr1;chr1;chr1;chr1;chr1;chr1;chr1;chr1;chr1;chr1;chr1;chr1;chr1;chr1;chr1;chr1;chr1;chr1;chr1;chr1;chr1;chr1;chr1;chr1;chr1;chr1;chr1;chr1;chr1;chr1;chr1;chr1;chr1;chr1;chr1;chr1;chr1;chr1;chr1;chr1;chr1;chr1;chr1;chr1;chr1;chr1;chr1;chr1;chr1…	1751232;1751232;1751232;1752471;1752975;1753567;1753567;1753567;1753567;1753567;1754051;1754051;1754051;1754051;1754061;1754163;1754165;1754171;1754181;1754203;1754284;1754284;1754284;1754284;1754284;1754284;1754284;1754284;1754284;1754343;1754544;1754544;1754544;1754544;1754544;1754544;1754544;1754544;1754544;1754544;1754544;1755374;1755374;1755374;1755374;1755374;1755374;1755374;1755374;1756004…	1753060;1753060;1753060;1753060;1753060;1753649;1753649;1753649;1753649;1753649;1754208;1754208;1754208;1754208;1754208;1754383;1754208;1754208;1754208;1754383;1754383;1754383;1754383;1754383;1754383;1754383;1754383;1754383;1754383;1754383;1754698;1754896;1754698;1754698;1754866;1754698;1754698;1754698;1754698;1754698;1754698;1755476;1755476;1755476;1755476;1755476;1755476;1755476;1755476;1756343…	5570	10.2882614616317	10.4664550886437	10.2382076163069	10.4423500248988	10.450631376055	10.5174700356752	10.2827438084965	10.6037749519964	10.5921444212996	10.523971623198	9.87874501559194	9.89163282618948	1.13146630903193	1.15200135092178	1.04741898493058	1.24922309237761	0.953845297345666	1.00897316923841
ENSG00000078369.17	GNB1	gene_type protein_coding	chr1;chr1;chr1;chr1;chr1;chr1;chr1;chr1;chr1;chr1;chr1;chr1;chr1;chr1;chr1;chr1;chr1;chr1;chr1;chr1;chr1;chr1;chr1;chr1;chr1;chr1;chr1;chr1;chr1;chr1;chr1;chr1;chr1;chr1;chr1;chr1;chr1;chr1;chr1;chr1;chr1;chr1;chr1;chr1;chr1;chr1;chr1;chr1;chr1;chr1;chr1;chr1;chr1;chr1;chr1;chr1;chr1;chr1;chr1;chr1;chr1;chr1;chr1;chr1;chr1;chr1;chr1;chr1;chr1;chr1	1785285;1785285;1785286;1787322;1787322;1787322;1787987;1789053;1789053;1789053;1789061;1790395;1790395;1790395;1790395;1790395;1790565;1793245;1793245;1793245;1793245;1793245;1793245;1793245;1804419;1804419;1804419;1804419;1804419;1804419;1804526;1806475;1806475;1806475;1806475;1806475;1806475;1806475;1815756;1815756;1815756;1815756;1815756;1815756;1817687;1817837;1817837;1817837;1817837;1824988…	1787053;1787053;1787053;1787437;1787437;1787437;1789269;1789269;1789269;1789269;1789269;1790596;1790596;1790596;1790596;1790596;1790596;1793311;1793311;1793311;1794197;1793311;1793311;1793311;1804581;1804581;1804581;1804581;1804581;1804581;1804581;1806538;1806538;1806538;1806538;1806538;1806538;1806538;1815862;1815862;1815862;1815862;1815862;1815862;1818386;1817875;1817875;1817875;1817875;1825499…	6417	12.6796825139718	12.5576614022059	12.7230779199937	12.7267828699004	12.6972403451219	12.7928877132998	12.4978587544522	12.5980441688699	12.9616511184062	12.8187325667007	12.2461991059478	12.2402507061601	0.918899436609673	1.00257137591259	1.0685447794263	1.071911215157	0.905685112621426	0.995885371833131
ENSG00000231050.1	RP1-140A9.1	gene_type antisense	chr1;chr1	1891471;1892134	1891851;1892658	906	4.11398763489342	3.95438272415751	3.96520609223261	3.99438106532615	4.17203110618318	3.9399101021215	3.55782624462725	3.95050242154829	4.45830789965566	4.47769828427326	3.55782624462725	3.55782624462725	0.895270211592215	1.02042841145107	0.851382296235457	1.31282641920024	1.01353111849296	1
ENSG00000169885.9	CALML6	gene_type protein_coding	chr1;chr1;chr1;chr1;chr1;chr1;chr1;chr1;chr1;chr1;chr1;chr1;chr1;chr1;chr1;chr1;chr1	1914827;1915108;1915266;1915409;1915685;1916441;1916441;1916752;1916752;1916752;1916974;1916974;1916974;1916974;1917147;1917147;1917147	1915307;1915307;1916896;1915735;1915735;1916615;1916615;1916896;1916896;1916896;1917071;1917074;1917074;1917074;1917294;1917296;1917294	2321	4.11398763489342	4.34368653389374	4.13206609265227	4.6881228546508	4.68658471014338	4.31549205937346	4.78830407589882	4.7676517037665	4.86958772347916	4.56224313213017	3.97541602041241	4.15839371305164	1.17259019554756	1.4702451811939	0.773196680690665	0.985786840836319	0.808127822383197	1.13522454884573
ENSG00000178821.12	TMEM52	gene_type protein_coding	chr1;chr1;chr1;chr1;chr1;chr1;chr1;chr1;chr1;chr1;chr1;chr1;chr1;chr1;chr1;chr1;chr1;chr1;chr1;chr1;chr1	1917590;1917591;1917845;1917937;1918099;1918253;1918253;1918253;1918253;1918386;1918893;1918893;1918893;1918893;1919045;1919045;1919045;1919045;1919182;1919182;1919182	1918162;1918162;1918071;1918162;1918162;1918934;1918431;1918797;1918431;1918431;1918934;1918934;1919088;1918934;1919088;1919269;1919258;1919088;1919269;1919270;1919273	1594	6.20844189988513	6.65781901260771	6.39735787075149	6.78537527945966	6.69308787008798	7.16883970806372	6.41994560513988	6.82816086478594	6.89553525963081	6.67837308376517	6.23581792929043	6.31804827737911	1.36545059267992	1.30859386189621	1.39064274277303	1.3270431294418	0.860255922307436	1.05865341141442
ENSG00000142609.17	CFAP74	gene_type protein_coding	chr1;chr1;chr1;chr1;chr1;chr1;chr1;chr1;chr1;chr1;chr1;chr1;chr1;chr1;chr1;chr1;chr1;chr1;chr1;chr1;chr1;chr1;chr1;chr1;chr1;chr1;chr1;chr1;chr1;chr1;chr1;chr1;chr1;chr1;chr1;chr1;chr1;chr1;chr1;chr1;chr1;chr1;chr1;chr1;chr1;chr1;chr1;chr1;chr1;chr1;chr1;chr1;chr1;chr1;chr1;chr1;chr1;chr1;chr1;chr1;chr1;chr1;chr1;chr1;chr1;chr1;chr1;chr1;chr1;chr1;chr1;chr1;chr1;chr1;chr1;chr1;chr1;chr1;chr1;chr1…	1921951;1921957;1922083;1922589;1922589;1922985;1922985;1922985;1923367;1923367;1923367;1923775;1923775;1923775;1924391;1924391;1924391;1925783;1925783;1925783;1926228;1926228;1926228;1926457;1926457;1926457;1926652;1926652;1926652;1926894;1926894;1927607;1928784;1930060;1938855;1939594;1940316;1942028;1944331;1946317;1946348;1946990;1946990;1953313;1955148;1955691;1955691;1955691;1955711;1956620…	1922388;1922388;1922388;1922723;1922723;1923145;1923145;1923115;1923499;1923499;1923499;1923929;1923929;1923929;1924520;1924520;1924520;1925938;1925938;1925938;1926347;1926347;1926347;1926512;1926512;1926512;1926761;1927929;1926761;1927403;1927028;1927746;1928882;1930336;1938988;1939767;1940403;1942156;1944452;1946439;1946439;1947054;1947054;1955850;1955523;1955850;1955850;1955850;1955850;1956784…	10422	4.77292150848265	4.5882780818109	4.45715275953258	4.42132383357474	4.30730794355666	4.73655556449821	4.6499347801402	4.64593913043284	4.36577948478197	4.56224313213017	4.38456570337338	4.29078246946898	0.879866514920062	0.97547112553838	1.34653116503338	0.997234258400812	1.14588609893268	0.937062230653034
ENSG00000233542.1	RP11-547D24.1	gene_type antisense	chr1;chr1	2013213;2015365	2015000;2015530	1954	3.55782624462725	3.55782624462725	3.55782624462725	3.55782624462725	3.55782624462725	3.55782624462725	3.55782624462725	3.55782624462725	3.55782624462725	3.97475709050258	3.55782624462725	3.55782624462725	1	1	1	1	1.33508430584895	1
ENSG00000187730.8	GABRD	gene_type protein_coding	chr1;chr1;chr1;chr1;chr1;chr1;chr1;chr1;chr1;chr1;chr1;chr1;chr1;chr1;chr1;chr1;chr1;chr1;chr1;chr1;chr1;chr1;chr1;chr1;chr1;chr1;chr1;chr1;chr1;chr1;chr1;chr1;chr1;chr1;chr1;chr1;chr1;chr1;chr1;chr1;chr1;chr1;chr1;chr1;chr1;chr1;chr1;chr1;chr1;chr1;chr1;chr1;chr1;chr1;chr1;chr1;chr1;chr1;chr1;chr1;chr1;chr1;chr1;chr1;chr1;chr1;chr1;chr1;chr1;chr1;chr1;chr1;chr1;chr1;chr1;chr1;chr1;chr1;chr1;chr1…	2019298;2019329;2019360;2019360;2019360;2019379;2019387;2019404;2019484;2022315;2023561;2023797;2024270;2024942;2024942;2024942;2024942;2024942;2024942;2024942;2024942;2024942;2024942;2025334;2025334;2025334;2025334;2025334;2025334;2025334;2025334;2025334;2025334;2025334;2025346;2025518;2025518;2025518;2025518;2025518;2025518;2025518;2025518;2025518;2025518;2025518;2025518;2025526;2026528;2026895…	2019491;2019491;2019491;2019491;2019491;2019491;2019491;2019491;2019491;2022391;2024223;2023890;2025054;2025054;2025054;2025054;2025054;2025054;2025054;2025054;2025054;2025054;2025054;2025401;2025401;2025401;2025401;2025401;2025401;2025401;2025401;2025401;2025432;2025401;2025401;2025738;2025738;2025738;2025738;2025792;2025738;2025738;2025738;2025738;2025738;2025738;2025738;2025738;2027659;2028292…	5556	6.03871024174455	6.06935454375921	6.32973429678395	6.29061119200673	6.30788829496064	6.61088295357876	5.9482617347171	6.28457139644998	6.89553525963081	7.01619471032664	6.25517649686904	6.3742948819355	1.02146820760062	0.973246323769661	1.2337026021852	1.26252299242738	1.08723171865611	1.08607097377651
ENSG00000226969.1	RP11-547D24.3	gene_type antisense	chr1;chr1;chr1;chr1;chr1	2049203;2049304;2049598;2049598;2049868	2049468;2049468;2049666;2049651;2050070	538	3.95230142254003	4.11690410408451	3.55782624462725	3.55782624462725	3.99376167689582	4.09661836972613	4.1514250525846	3.95050242154829	3.55782624462725	3.55782624462725	3.55782624462725	3.9840131269933	1.12085735121679	1	1.07389779287468	0.869994007565042	1	1.34367747037693
ENSG00000067606.16	PRKCZ	gene_type protein_coding	chr1;chr1;chr1;chr1;chr1;chr1;chr1;chr1;chr1;chr1;chr1;chr1;chr1;chr1;chr1;chr1;chr1;chr1;chr1;chr1;chr1;chr1;chr1;chr1;chr1;chr1;chr1;chr1;chr1;chr1;chr1;chr1;chr1;chr1;chr1;chr1;chr1;chr1;chr1;chr1;chr1;chr1;chr1;chr1;chr1;chr1;chr1;chr1;chr1;chr1;chr1;chr1;chr1;chr1;chr1;chr1;chr1;chr1;chr1;chr1;chr1;chr1;chr1;chr1;chr1;chr1;chr1;chr1;chr1;chr1;chr1;chr1;chr1;chr1;chr1;chr1;chr1;chr1;chr1;chr1…	2050470;2050485;2050503;2050808;2055441;2055441;2055441;2055441;2055441;2055679;2056484;2056484;2056484;2056484;2059541;2059541;2059541;2059541;2059541;2071299;2073462;2073719;2073986;2074688;2074855;2075244;2082248;2098347;2104716;2104739;2111654;2116205;2133638;2134813;2134990;2135262;2135262;2135262;2135262;2135262;2135262;2135262;2135262;2135262;2135262;2135262;2135262;2135262;2135262;2135262…	2050701;2050701;2050701;2051012;2055562;2055562;2055760;2055562;2055562;2055876;2056573;2056573;2056573;2056573;2059591;2059591;2059591;2059591;2059591;2071536;2073929;2073929;2074275;2074767;2075133;2075379;2082460;2098555;2104895;2104895;2111817;2116310;2134000;2135086;2135086;2135347;2135347;2135347;2135347;2135347;2135347;2135347;2135347;2135347;2135347;2135347;2135347;2135347;2135347;2135347…	7636	8.80324027424376	8.82059971463978	8.82443426307685	8.70235709398769	8.9212971462923	8.75490533446233	9.0016644151182	9.14864174865179	9.37509981989399	9.16981685304723	8.43901224625071	8.2608836535369	1.01210533069806	0.918863732569298	0.891068463749565	1.10724718816861	0.867368546819591	0.883848746863827
ENSG00000271806.1	RP5-892K4.1	gene_type antisense	chr1	2141084	2145279	4196	4.11398763489342	3.95438272415751	3.96520609223261	3.55782624462725	3.99376167689582	3.55782624462725	4.1514250525846	4.11146652358321	3.55782624462725	4.47769828427326	4.14636171533227	3.9840131269933	0.895270211592215	0.753991493562934	0.73921429838892	0.972682907272541	1.89194747904902	0.893569229371001
ENSG00000182873.5	PRKCZ-AS1	gene_type antisense	chr1;chr1;chr1;chr1;chr1	2181794;2182735;2183571;2183571;2183991	2182741;2182823;2183875;2183704;2184389	1734	5.02618270918522	5.38258088476974	5.02334307364636	5.35043000619285	5.57693724457691	5.14664629201116	5.2090652308034	5.60885875383289	5.42893753175385	5.5332049179967	4.77825682765974	5.03471918948832	1.28022570006474	1.25447779337409	0.742112106283757	1.31931907772575	1.07494838319963	1.19454595955534
ENSG00000162585.16	FAAP20	gene_type protein_coding	chr1;chr1;chr1;chr1;chr1;chr1;chr1;chr1;chr1;chr1;chr1;chr1;chr1;chr1;chr1;chr1;chr1;chr1;chr1;chr1;chr1;chr1;chr1;chr1;chr1;chr1;chr1;chr1;chr1;chr1;chr1;chr1;chr1;chr1;chr1;chr1;chr1;chr1;chr1;chr1;chr1;chr1;chr1;chr1;chr1;chr1;chr1;chr1;chr1;chr1;chr1;chr1;chr1;chr1;chr1;chr1;chr1;chr1;chr1;chr1;chr1;chr1;chr1;chr1;chr1;chr1;chr1	2184461;2184464;2184478;2184478;2185175;2186004;2186004;2186838;2186838;2189544;2189548;2189548;2189548;2189548;2189569;2189580;2189713;2189713;2191901;2192647;2192845;2193639;2193639;2193639;2193639;2193639;2193639;2193639;2193639;2193639;2193639;2193639;2193639;2193998;2193998;2193998;2193998;2193998;2193998;2193998;2193998;2193998;2194688;2194688;2194688;2194688;2194688;2194688;2194688;2194688…	2185513;2185513;2185513;2185513;2185513;2186249;2186249;2187206;2187206;2193910;2189781;2189781;2189781;2189781;2189781;2189781;2189781;2189781;2192975;2192975;2192975;2193910;2193910;2193910;2193910;2193910;2193910;2193910;2193910;2193910;2193910;2193910;2193910;2194133;2194213;2194133;2194133;2194133;2194108;2194133;2194133;2194133;2194739;2194748;2194750;2194774;2194751;2194775;2194741;2194775…	10916	8.77723870106048	8.92799587705054	8.75348091132903	8.74685699844677	8.9373374672203	9.05464890777884	8.92267255025196	9.23527839710684	9.32692892386585	9.08022406048065	8.55800499767284	8.34147497837701	1.1101519651418	0.995419177580121	1.08471154474758	1.24194892735562	0.842819230021397	0.860632949731156
ENSG00000234396.3	RP11-181G12.4	gene_type lincRNA	chr1;chr1	2212523;2220535	2212644;2220738	326	3.55782624462725	3.55782624462725	3.55782624462725	3.55782624462725	3.55782624462725	3.55782624462725	3.55782624462725	3.55782624462725	3.55782624462725	3.55782624462725	3.55782624462725	3.55782624462725	1	1	1	1	1	1
ENSG00000157933.9	SKI	gene_type protein_coding	chr1;chr1;chr1;chr1;chr1;chr1;chr1;chr1;chr1;chr1;chr1;chr1;chr1;chr1	2228695;2232479;2247996;2302978;2302978;2302978;2303285;2303285;2303646;2303840;2304293;2304293;2306020;2306577	2229735;2232669;2248071;2303103;2303038;2303103;2303376;2303400;2304108;2304102;2304368;2304585;2306250;2310119	6080	8.27683093887462	9.63353682903484	8.73117396057062	9.2110956806135	9.29189409465686	9.62766918538043	9.46509969964042	9.93052979423833	9.6516478250134	9.10898642078915	8.44725851600497	8.96123594956395	2.56099758087092	1.3946679902655	1.26205526837786	1.38072891337343	0.68650331678977	1.42798164321433
ENSG00000116151.13	MORN1	gene_type protein_coding	chr1;chr1;chr1;chr1;chr1;chr1;chr1;chr1;chr1;chr1;chr1;chr1;chr1;chr1;chr1;chr1;chr1;chr1;chr1;chr1;chr1;chr1;chr1;chr1;chr1;chr1;chr1;chr1;chr1;chr1;chr1;chr1;chr1;chr1;chr1;chr1;chr1;chr1;chr1;chr1;chr1;chr1;chr1;chr1;chr1;chr1;chr1;chr1;chr1;chr1;chr1;chr1;chr1;chr1;chr1;chr1;chr1;chr1;chr1;chr1;chr1;chr1;chr1;chr1;chr1;chr1;chr1	2321253;2324097;2332126;2336469;2336469;2336717;2336717;2355175;2357432;2357432;2357432;2358592;2358592;2358592;2358638;2371165;2371676;2372481;2372481;2372481;2372481;2372481;2374461;2374461;2374461;2374461;2374461;2374461;2374853;2375599;2378055;2379109;2384978;2384978;2384978;2384978;2384978;2384978;2384978;2385372;2385807;2385807;2385807;2385807;2385807;2385807;2387056;2387419;2387419;2387419…	2321579;2324143;2332753;2336548;2336548;2336850;2336850;2355464;2357598;2357598;2357598;2358715;2358715;2358715;2358715;2372591;2371905;2372591;2372591;2372591;2372591;2372591;2374557;2374557;2374557;2374557;2374557;2374557;2379227;2375878;2378980;2379227;2385065;2385065;2385158;2385121;2385065;2385065;2385065;2388509;2385897;2385897;2385897;2385897;2385897;2385897;2387529;2387529;2387529;2387529…	11337	6.6457440048788	6.85138700620882	6.77143984186014	6.9091608237508	7.03163795341086	7.16883970806372	7.16897599523002	6.97770074332293	7.36523084162007	7.02728169046331	6.32999948645212	6.67102952603204	1.15320020733579	1.1001658160433	1.09976993662337	0.875831199218116	0.791165185890406	1.26666062766639
ENSG00000272161.1	RP4-713A8.1	gene_type sense_intronic	chr1	2326201	2326693	493	3.55782624462725	3.55782624462725	3.55782624462725	3.55782624462725	3.99376167689582	3.55782624462725	3.55782624462725	3.55782624462725	3.55782624462725	3.55782624462725	3.55782624462725	3.9840131269933	1	1	0.73921429838892	1	1	1.34367747037693
ENSG00000269896.2	RP4-740C4.5	gene_type transcribed_processed_pseudogene	chr1;chr1	2350414;2351644	2352820;2351857	2407	5.02618270918522	5.16169540073153	4.81062350870356	5.06796559516205	5.26137129480318	5.32294964283528	5.16434554452006	5.3327735429422	5.39415100968182	5.35635212438161	5.23895909440223	5.22680128729916	1.09848311314513	1.19527459030337	1.04360687112839	1.12383325658594	0.974140056235469	0.991608259175729
ENSG00000272420.1	RP4-740C4.7	gene_type sense_intronic	chr1	2363061	2363628	568	3.95230142254003	4.24046069271801	4.25885812962813	4.17289735623919	3.99376167689582	4.21583248886372	4.39158453445309	4.11146652358321	4.13281753800557	4.14543931115403	3.55782624462725	3.55782624462725	1.22108130976571	0.942156890627973	1.16640661925475	0.823523651182161	1.00878712860413	1
ENSG00000157916.19	RER1	gene_type protein_coding	chr1;chr1;chr1;chr1;chr1;chr1;chr1;chr1;chr1;chr1;chr1;chr1;chr1;chr1;chr1;chr1;chr1;chr1;chr1;chr1;chr1;chr1;chr1;chr1;chr1;chr1;chr1;chr1;chr1;chr1;chr1;chr1;chr1;chr1;chr1;chr1;chr1;chr1;chr1;chr1;chr1;chr1;chr1;chr1;chr1;chr1;chr1;chr1;chr1	2391775;2391828;2391833;2391843;2391857;2391890;2393174;2394005;2395608;2395784;2395784;2395784;2395784;2395784;2395784;2395784;2397116;2397116;2397116;2397116;2397116;2397116;2397116;2399415;2399415;2399415;2399415;2399415;2400857;2400857;2400857;2400857;2400857;2400857;2400857;2401951;2402097;2402207;2402207;2402207;2402207;2402207;2402207;2403035;2403035;2403035;2403035;2403035;2403035	2391958;2391958;2391958;2391958;2391958;2391958;2393231;2395871;2395648;2395871;2396367;2395871;2395871;2395871;2395871;2395871;2397220;2397220;2397220;2397220;2397220;2397220;2397220;2399514;2399514;2399514;2399514;2399514;2400935;2400935;2400935;2400935;2400935;2400935;2400935;2402342;2402342;2402316;2402342;2402342;2402342;2402325;2402342;2403216;2403227;2403751;2403064;2405444;2405442	5691	10.8417490392226	10.6432522311722	11.068417351126	10.8909299271582	10.8044684978039	10.8614489237996	10.5961933064021	10.70284206932	10.8509388743118	10.8147819183692	10.5506382279983	10.3127483090573	0.871458091593867	0.884241638030769	1.04028615217126	1.07672420608942	0.975249354897793	0.8479846654092
ENSG00000157911.9	PEX10	gene_type protein_coding	chr1;chr1;chr1;chr1;chr1;chr1;chr1;chr1;chr1;chr1;chr1;chr1;chr1;chr1;chr1;chr1;chr1;chr1;chr1;chr1;chr1;chr1;chr1;chr1;chr1;chr1;chr1;chr1;chr1;chr1;chr1;chr1;chr1;chr1;chr1	2403964;2404819;2404838;2406484;2406484;2406484;2406518;2406720;2406720;2406720;2406720;2408452;2408452;2408452;2408456;2408530;2408583;2408604;2408755;2409678;2410261;2410371;2410371;2410371;2410371;2410371;2410371;2410630;2410630;2412391;2412391;2412391;2412391;2412391;2413597	2405834;2405834;2405828;2406619;2406619;2406619;2406619;2406895;2406895;2406895;2406955;2408858;2408858;2408858;2408858;2408858;2408858;2408858;2408858;2410004;2410451;2410451;2410451;2410451;2410451;2410451;2410451;2410868;2410836;2412514;2412535;2412540;2412571;2412530;2413797	3789	8.67767093093114	8.79172248820599	8.96212953616904	8.92199949156223	8.705968107398	8.69248526960852	8.51527449628647	8.86320401726053	9.05077752412883	8.95906625360361	8.52722279118865	8.23132622613916	1.08226332044049	0.972567276195608	0.990697943312333	1.27273275778618	0.938408983395696	0.814565961808192
ENSG00000149527.17	PLCH2	gene_type protein_coding	chr1;chr1;chr1;chr1;chr1;chr1;chr1;chr1;chr1;chr1;chr1;chr1;chr1;chr1;chr1;chr1;chr1;chr1;chr1;chr1;chr1;chr1;chr1;chr1;chr1;chr1;chr1;chr1;chr1;chr1;chr1;chr1;chr1;chr1;chr1;chr1;chr1;chr1;chr1;chr1;chr1;chr1;chr1;chr1;chr1;chr1;chr1;chr1;chr1;chr1;chr1;chr1;chr1;chr1;chr1;chr1;chr1;chr1;chr1;chr1;chr1;chr1;chr1;chr1;chr1;chr1;chr1;chr1;chr1;chr1;chr1;chr1;chr1;chr1;chr1;chr1;chr1;chr1;chr1;chr1…	2425980;2430338;2467459;2476315;2476315;2478476;2478476;2478476;2478476;2479090;2479734;2479734;2479734;2479734;2479888;2480183;2480184;2480184;2480184;2480184;2484448;2484448;2484448;2484448;2484448;2486907;2486907;2486907;2486907;2486907;2487173;2487173;2487173;2487173;2487173;2487598;2487598;2487598;2487598;2487598;2489207;2489207;2489207;2489207;2489207;2489760;2489760;2489760;2489760;2489760…	2426037;2430629;2467662;2476712;2476712;2478622;2478622;2478622;2478622;2479978;2479977;2479978;2479804;2479978;2479978;2480312;2480312;2480312;2480312;2480312;2484618;2484618;2484618;2484618;2484618;2487000;2487000;2487000;2487000;2487000;2487376;2487376;2487376;2487376;2487376;2487718;2487718;2487718;2487718;2487718;2489378;2489378;2489378;2489378;2489378;2489867;2489867;2489867;2489867;2489867…	10781	3.55782624462725	3.55782624462725	3.55782624462725	3.55782624462725	3.55782624462725	4.21583248886372	3.55782624462725	3.95050242154829	3.96574265195466	3.55782624462725	4.14636171533227	3.55782624462725	1	1	1.57790051111954	1.31282641920024	0.753711125063102	0.665017646772281
ENSG00000224387.1	RP3-395M20.2	gene_type antisense	chr1;chr1	2492300;2493101	2492596;2493258	455	3.55782624462725	3.55782624462725	3.55782624462725	3.55782624462725	3.55782624462725	3.55782624462725	3.55782624462725	3.55782624462725	3.55782624462725	3.55782624462725	3.55782624462725	3.55782624462725	1	1	1	1	1	1
ENSG00000229393.1	RP3-395M20.3	gene_type antisense	chr1;chr1	2493437;2494383	2493853;2494479	514	3.55782624462725	3.55782624462725	3.55782624462725	3.55782624462725	3.55782624462725	3.55782624462725	3.55782624462725	3.55782624462725	3.55782624462725	3.55782624462725	3.55782624462725	3.55782624462725	1	1	1	1	1	1
ENSG00000157881.13	PANK4	gene_type protein_coding	chr1;chr1;chr1;chr1;chr1;chr1;chr1;chr1;chr1;chr1;chr1;chr1;chr1;chr1;chr1;chr1;chr1;chr1;chr1;chr1;chr1;chr1;chr1;chr1;chr1;chr1;chr1;chr1;chr1;chr1;chr1;chr1;chr1;chr1;chr1;chr1;chr1;chr1;chr1;chr1;chr1;chr1;chr1;chr1;chr1;chr1;chr1;chr1;chr1;chr1;chr1;chr1;chr1;chr1;chr1;chr1;chr1;chr1;chr1;chr1;chr1;chr1;chr1;chr1;chr1;chr1;chr1;chr1;chr1;chr1;chr1;chr1;chr1;chr1;chr1;chr1;chr1;chr1;chr1;chr1…	2508533;2508537;2508795;2509793;2509862;2509862;2509862;2510057;2510057;2510057;2510057;2510293;2510678;2510678;2510678;2510678;2511338;2511338;2511338;2511338;2511338;2511628;2511628;2511628;2511628;2511628;2512406;2512888;2512888;2512888;2512888;2512888;2514002;2514002;2514002;2514002;2514002;2514354;2514354;2514354;2514354;2514413;2514433;2515258;2515562;2515562;2515562;2515562;2515562;2518164…	2509060;2509060;2509060;2509930;2509930;2509930;2509930;2510157;2510157;2510157;2510157;2510782;2510748;2510748;2510782;2510782;2511387;2511387;2511387;2511387;2511387;2511683;2511683;2511683;2511683;2511683;2513039;2513013;2513039;2513039;2513039;2513039;2514085;2514089;2514089;2514089;2514089;2514403;2514466;2514466;2514466;2514466;2514466;2515401;2515937;2515717;2515717;2515717;2515717;2518264…	5107	3.95230142254003	4.24046069271801	4.13206609265227	3.55782624462725	5.34815249541593	4.09661836972613	3.97903344337653	3.55782624462725	3.96574265195466	3.55782624462725	4.56377988186717	3.55782624462725	1.22108130976571	0.67164004343305	0.420001351187651	0.746799466090436	0.753711125063102	0.497940878225945
ENSG00000197921.5	HES5	gene_type protein_coding	chr1;chr1;chr1	2528745;2529846;2530111	2529749;2530011;2530245	1306	3.55782624462725	3.55782624462725	3.55782624462725	3.55782624462725	3.55782624462725	3.55782624462725	3.55782624462725	3.55782624462725	3.55782624462725	3.55782624462725	3.55782624462725	3.55782624462725	1	1	1	1	1	1
ENSG00000272449.1	RP3-395M20.12	gene_type lincRNA	chr1	2546465	2547460	996	3.95230142254003	3.55782624462725	3.55782624462725	3.55782624462725	3.55782624462725	3.55782624462725	3.55782624462725	3.55782624462725	3.55782624462725	3.55782624462725	3.55782624462725	3.55782624462725	0.760766076973291	1	1	1	1	1
ENSG00000238164.6	RP3-395M20.8	gene_type antisense	chr1;chr1;chr1;chr1;chr1;chr1;chr1;chr1;chr1;chr1;chr1;chr1;chr1;chr1;chr1;chr1;chr1;chr1;chr1	2549920;2549920;2549920;2550074;2550283;2550573;2550992;2550992;2550992;2551775;2553626;2554101;2554101;2554241;2554724;2555681;2556428;2556977;2556977	2550119;2550274;2550274;2550274;2550731;2550731;2551598;2554150;2552106;2552703;2553814;2554296;2554245;2554296;2556696;2555869;2556696;2557031;2557011	6137	3.55782624462725	3.55782624462725	3.55782624462725	3.55782624462725	3.55782624462725	3.55782624462725	3.55782624462725	3.55782624462725	3.55782624462725	3.55782624462725	3.55782624462725	3.55782624462725	1	1	1	1	1	1
ENSG00000157873.17	TNFRSF14	gene_type protein_coding	chr1;chr1;chr1;chr1;chr1;chr1;chr1;chr1;chr1;chr1;chr1;chr1;chr1;chr1;chr1;chr1;chr1;chr1;chr1;chr1;chr1;chr1;chr1;chr1;chr1;chr1;chr1;chr1;chr1;chr1;chr1;chr1;chr1;chr1;chr1;chr1;chr1;chr1;chr1;chr1;chr1;chr1;chr1;chr1;chr1;chr1;chr1;chr1;chr1;chr1;chr1;chr1;chr1;chr1;chr1;chr1;chr1;chr1;chr1;chr1;chr1;chr1;chr1;chr1;chr1;chr1;chr1;chr1;chr1;chr1;chr1;chr1;chr1;chr1;chr1;chr1;chr1;chr1;chr1;chr1…	2555639;2555791;2555802;2555980;2556222;2556366;2556386;2556405;2556406;2556557;2556571;2556585;2556585;2556585;2556585;2556585;2557726;2557726;2557726;2557726;2557726;2557726;2557726;2557726;2557726;2557726;2557813;2558343;2558343;2558343;2558343;2558343;2558343;2558343;2558343;2558343;2558343;2558343;2558881;2559352;2559580;2559823;2559823;2559823;2559823;2559823;2559823;2559823;2560554;2560624…	2555667;2555850;2556252;2556032;2556261;2556733;2556455;2556733;2556733;2556733;2556733;2556733;2556733;2556733;2556733;2556733;2557834;2557834;2557834;2557834;2557834;2557834;2557834;2557834;2557834;2557834;2557834;2559978;2559978;2558468;2558468;2558862;2558468;2558468;2558468;2558468;2558468;2558468;2559156;2559978;2559978;2559978;2559978;2559978;2559978;2559978;2559978;2559978;2560714;2560714…	6219	3.55782624462725	3.55782624462725	3.55782624462725	3.55782624462725	3.55782624462725	3.55782624462725	3.55782624462725	3.55782624462725	3.55782624462725	3.55782624462725	3.55782624462725	3.55782624462725	1	1	1	1	1	1
ENSG00000225931.3	RP3-395M20.7	gene_type TEC	chr1;chr1;chr1	2566410;2567866;2568977	2566605;2568054;2569888	1297	3.55782624462725	3.55782624462725	3.55782624462725	3.55782624462725	3.55782624462725	3.55782624462725	3.55782624462725	3.55782624462725	3.55782624462725	3.55782624462725	3.55782624462725	3.55782624462725	1	1	1	1	1	1
ENSG00000228037.1	RP3-395M20.9	gene_type lincRNA	chr1;chr1;chr1	2581560;2583370;2584125	2581650;2583495;2584533	626	3.55782624462725	3.55782624462725	3.55782624462725	3.55782624462725	3.55782624462725	3.55782624462725	3.55782624462725	3.55782624462725	3.55782624462725	3.55782624462725	3.55782624462725	3.55782624462725	1	1	1	1	1	1
ENSG00000157870.14	FAM213B	gene_type protein_coding	chr1;chr1;chr1;chr1;chr1;chr1;chr1;chr1;chr1;chr1;chr1;chr1;chr1;chr1;chr1;chr1;chr1;chr1;chr1;chr1;chr1;chr1;chr1;chr1;chr1;chr1;chr1;chr1;chr1;chr1;chr1;chr1;chr1;chr1;chr1;chr1;chr1;chr1;chr1;chr1;chr1;chr1;chr1;chr1;chr1;chr1;chr1;chr1;chr1;chr1;chr1;chr1;chr1;chr1;chr1;chr1;chr1;chr1;chr1;chr1;chr1;chr1;chr1;chr1;chr1;chr1;chr1;chr1;chr1;chr1;chr1;chr1;chr1;chr1;chr1;chr1;chr1;chr1;chr1;chr1…	2586491;2586540;2586750;2586750;2586775;2586780;2586796;2586798;2586817;2586833;2586877;2587042;2587078;2587085;2587091;2587091;2587091;2587091;2587091;2587091;2587091;2587091;2587091;2587091;2587114;2587741;2587741;2587741;2587741;2587741;2587741;2587741;2587741;2587741;2587741;2587741;2587741;2587741;2587741;2588336;2588336;2588390;2588390;2588390;2588390;2588390;2588390;2588390;2588390;2588390…	2586591;2586591;2586948;2586948;2586948;2586948;2586948;2586948;2586873;2586948;2586948;2587295;2587295;2587295;2587295;2587295;2587295;2587295;2587295;2587295;2587295;2587295;2587295;2587295;2587295;2587792;2587792;2587792;2587792;2587792;2587792;2587792;2587792;2587792;2587792;2587792;2587792;2587792;2587792;2588453;2588453;2588745;2588453;2588453;2588453;2588453;2588453;2588453;2588453;2588453…	3371	4.50974017200837	3.95438272415751	3.96520609223261	4.30835738787737	3.99376167689582	4.31549205937346	3.97903344337653	4.50552303053715	5.75925838740589	4.27507766239493	3.55782624462725	3.55782624462725	0.680488436844777	1.26852442269663	1.24982870698839	1.44042005071205	0.357451466186596	1
ENSG00000142606.15	MMEL1	gene_type protein_coding	chr1;chr1;chr1;chr1;chr1;chr1;chr1;chr1;chr1;chr1;chr1;chr1;chr1;chr1;chr1;chr1;chr1;chr1;chr1;chr1;chr1;chr1;chr1;chr1;chr1;chr1;chr1;chr1;chr1;chr1;chr1;chr1;chr1;chr1;chr1;chr1;chr1;chr1;chr1;chr1;chr1;chr1;chr1;chr1;chr1;chr1;chr1;chr1;chr1;chr1;chr1;chr1;chr1;chr1;chr1;chr1;chr1;chr1;chr1;chr1;chr1;chr1;chr1;chr1;chr1;chr1;chr1;chr1;chr1;chr1;chr1;chr1;chr1;chr1;chr1;chr1;chr1;chr1;chr1;chr1…	2590639;2590643;2590926;2590926;2591557;2591557;2591557;2591557;2591694;2591694;2591932;2591932;2591932;2592655;2592655;2592655;2592655;2592655;2592655;2592721;2592833;2592833;2592833;2592833;2593814;2593814;2593814;2593814;2594385;2594385;2594385;2594790;2594790;2594790;2595276;2595276;2595276;2596009;2596009;2596009;2596561;2596561;2596561;2598207;2598207;2598207;2598654;2598654;2598654;2603884…	2591089;2591089;2591089;2591089;2591633;2591633;2591633;2591633;2592027;2592027;2592027;2592027;2592027;2592720;2592879;2592720;2592720;2592720;2592678;2592868;2592966;2592966;2592966;2592966;2594073;2593962;2593933;2593933;2594443;2594443;2594443;2594893;2594893;2594893;2595359;2595359;2595359;2596107;2596107;2596107;2596689;2596689;2596689;2598300;2598300;2598300;2598790;2598790;2598790;2603973…	3844	3.55782624462725	3.95438272415751	3.55782624462725	3.55782624462725	3.55782624462725	3.9399101021215	3.55782624462725	3.55782624462725	3.96574265195466	3.97475709050258	3.55782624462725	3.55782624462725	1.3163621772543	1	1.30322289775605	1	1.0062678942155	1
ENSG00000237058.1	RP13-436F16.1	gene_type antisense	chr1;chr1	2632568;2636356	2632675;2636620	373	3.55782624462725	3.55782624462725	3.55782624462725	3.55782624462725	3.55782624462725	3.55782624462725	3.55782624462725	3.55782624462725	3.55782624462725	3.55782624462725	3.55782624462725	3.55782624462725	1	1	1	1	1	1
ENSG00000215912.12	TTC34	gene_type protein_coding	chr1;chr1;chr1;chr1;chr1;chr1;chr1;chr1;chr1;chr1;chr1;chr1;chr1;chr1;chr1;chr1	2635976;2641368;2644264;2644264;2645293;2645293;2783609;2783609;2785819;2785819;2787481;2787481;2789503;2789503;2800044;2801577	2641895;2641895;2644478;2644478;2645563;2645563;2783775;2783775;2786023;2786023;2787706;2787706;2789665;2790346;2800868;2801717	8814	3.55782624462725	3.55782624462725	3.55782624462725	3.55782624462725	3.55782624462725	3.55782624462725	3.55782624462725	3.55782624462725	3.55782624462725	3.97475709050258	3.55782624462725	3.55782624462725	1	1	1	1	1.33508430584895	1
ENSG00000283259.1	ABC14-1188822O7.1	gene_type antisense	chr1;chr1;chr1;chr1;chr1;chr1;chr1;chr1;chr1;chr1	2773603;2773947;2774230;2774790;2774993;2775155;2775357;2775519;2776049;2776370	2773864;2774066;2774709;2774910;2775072;2775274;2775437;2775634;2776129;2776473	1565	3.55782624462725	3.55782624462725	3.55782624462725	3.55782624462725	3.55782624462725	3.55782624462725	3.55782624462725	3.55782624462725	3.55782624462725	3.55782624462725	3.55782624462725	3.55782624462725	1	1	1	1	1	1
ENSG00000233234.1	RP11-740P5.2	gene_type lincRNA	chr1;chr1	2811850;2812235	2811998;2812692	607	3.55782624462725	3.55782624462725	3.55782624462725	3.55782624462725	3.55782624462725	3.55782624462725	3.55782624462725	3.55782624462725	3.55782624462725	3.55782624462725	3.55782624462725	3.55782624462725	1	1	1	1	1	1
ENSG00000231630.1	RP11-740P5.3	gene_type lincRNA	chr1;chr1	2814432;2814827	2814688;2814998	429	3.55782624462725	3.55782624462725	3.55782624462725	3.55782624462725	3.55782624462725	4.09661836972613	3.55782624462725	3.55782624462725	3.55782624462725	3.55782624462725	3.55782624462725	3.55782624462725	1	1	1.45275570996825	1	1	1
ENSG00000169717.6	ACTRT2	gene_type protein_coding	chr1	3021483	3022903	1421	3.55782624462725	3.55782624462725	3.55782624462725	3.55782624462725	3.55782624462725	3.55782624462725	3.55782624462725	3.55782624462725	3.55782624462725	3.97475709050258	3.55782624462725	3.55782624462725	1	1	1	1	1.33508430584895	1
ENSG00000177133.10	LINC00982	gene_type antisense	chr1;chr1;chr1;chr1;chr1;chr1;chr1;chr1;chr1;chr1;chr1;chr1;chr1;chr1;chr1;chr1;chr1;chr1;chr1;chr1;chr1;chr1;chr1;chr1;chr1;chr1;chr1	3059615;3059615;3059617;3059617;3059617;3060230;3060230;3060230;3060501;3060501;3060501;3061107;3061107;3061107;3061107;3061289;3061591;3061591;3061959;3062195;3062290;3063446;3064072;3064212;3067337;3067337;3068222	3062531;3059737;3059737;3060283;3059737;3060283;3060283;3060283;3060604;3060604;3060604;3064055;3062032;3061331;3061331;3061331;3061751;3061813;3062192;3062395;3063786;3063682;3064302;3064302;3067769;3068048;3068437	5600	4.77292150848265	4.88822384368833	4.68501284740425	4.6881228546508	4.68658471014338	4.98326642299408	5.16434554452006	4.7676517037665	4.97573403665526	5.10325960928617	4.89885243935514	4.58380936888272	1.08320202058575	1.00215801793058	1.2283159596798	0.759597024485652	1.09241844041493	0.803826992791993
ENSG00000142611.16	PRDM16	gene_type protein_coding	chr1;chr1;chr1;chr1;chr1;chr1;chr1;chr1;chr1;chr1;chr1;chr1;chr1;chr1;chr1;chr1;chr1;chr1;chr1;chr1;chr1;chr1;chr1;chr1;chr1;chr1;chr1;chr1;chr1;chr1;chr1;chr1;chr1;chr1;chr1;chr1;chr1;chr1;chr1;chr1;chr1;chr1;chr1;chr1;chr1;chr1;chr1;chr1;chr1;chr1;chr1;chr1;chr1;chr1;chr1;chr1;chr1;chr1;chr1;chr1;chr1;chr1;chr1;chr1;chr1;chr1;chr1;chr1;chr1;chr1;chr1;chr1;chr1;chr1;chr1;chr1;chr1;chr1;chr1;chr1…	3069168;3069183;3069197;3069211;3069211;3186125;3186125;3186125;3186125;3186125;3237931;3244087;3244087;3244087;3244087;3244087;3244132;3385149;3385149;3385152;3385152;3385152;3385152;3386676;3396491;3396491;3396491;3396491;3396491;3396491;3402791;3402791;3402791;3402791;3402791;3402791;3404739;3404739;3404739;3404739;3404739;3404739;3405495;3405495;3405495;3405495;3405495;3405495;3411384;3411384…	3069296;3069296;3069296;3069296;3069296;3186474;3186474;3186591;3186474;3186474;3238095;3244137;3244137;3244137;3244137;3244137;3244137;3385286;3385286;3385286;3385286;3385286;3385286;3386918;3396593;3396593;3396593;3396593;3396593;3396593;3402998;3402998;3402998;3402998;3402998;3402998;3404886;3404886;3404886;3404886;3404886;3404886;3405648;3405648;3405648;3405648;3405648;3405648;3412800;3412800…	9767	6.27760742754173	7.24386111194904	6.4137605779602	7.38573740244197	7.10212550419883	7.17720149496584	7.10639831270702	7.60656442888634	6.9854048069085	7.12335226960353	6.51708066517037	6.82561679472252	1.95376057821538	1.96152649767385	1.05341652087642	1.41437640848575	1.10033853861498	1.23845043418165
ENSG00000283572.1	MIR4251	gene_type miRNA	chr1	3127975	3128035	61	3.55782624462725	3.55782624462725	3.55782624462725	3.55782624462725	3.55782624462725	3.55782624462725	3.97903344337653	3.55782624462725	3.55782624462725	3.55782624462725	3.97541602041241	3.55782624462725	1	1	1	0.746799466090436	1	0.748674345507322
ENSG00000226286.1	RP1-163G9.2	gene_type antisense	chr1;chr1	3132927;3133573	3133258;3133709	469	4.2369208620727	4.24046069271801	4.25885812962813	3.55782624462725	4.30730794355666	3.9399101021215	4.4868859099821	3.95050242154829	4.81218729988587	3.55782624462725	4.27619612797294	3.9840131269933	1.00245663622934	0.615132077192249	0.775179411326523	0.689497158605302	0.419179173453481	0.816665393300489
ENSG00000279839.1	RP11-193J6.1	gene_type TEC	chr1	3205988	3208664	2677	3.55782624462725	3.55782624462725	3.55782624462725	3.55782624462725	3.55782624462725	3.9399101021215	3.55782624462725	3.95050242154829	3.55782624462725	3.97475709050258	3.55782624462725	3.55782624462725	1	1	1.30322289775605	1.31282641920024	1.33508430584895	1
ENSG00000272235.1	RP11-22L13.1	gene_type lincRNA	chr1	3306636	3310096	3461	3.55782624462725	3.55782624462725	3.55782624462725	3.55782624462725	3.55782624462725	3.55782624462725	3.97903344337653	3.55782624462725	3.55782624462725	3.55782624462725	3.55782624462725	3.55782624462725	1	1	1	0.746799466090436	1	1
ENSG00000130762.14	ARHGEF16	gene_type protein_coding	chr1;chr1;chr1;chr1;chr1;chr1;chr1;chr1;chr1;chr1;chr1;chr1;chr1;chr1;chr1;chr1;chr1;chr1;chr1;chr1;chr1;chr1;chr1;chr1;chr1;chr1;chr1;chr1;chr1;chr1;chr1;chr1;chr1;chr1;chr1;chr1;chr1;chr1;chr1;chr1;chr1;chr1;chr1;chr1;chr1;chr1;chr1;chr1;chr1;chr1;chr1;chr1;chr1;chr1;chr1;chr1;chr1;chr1;chr1;chr1	3454426;3463066;3466005;3466148;3466971;3467168;3467168;3468544;3468880;3468880;3468880;3469433;3469433;3469433;3469433;3471607;3471624;3472769;3473078;3473078;3473078;3473078;3473078;3473078;3473393;3473393;3473393;3473393;3473393;3473393;3473393;3474708;3474708;3474708;3474708;3474708;3475970;3475970;3475970;3475970;3475970;3477875;3477875;3477875;3477875;3478424;3478424;3478424;3479517;3479517…	3454811;3463672;3466193;3466193;3467337;3467337;3467337;3468936;3468936;3468936;3468936;3469593;3469593;3469593;3469593;3471791;3471791;3473230;3473230;3473230;3473230;3473230;3473230;3473230;3473522;3473522;3474457;3473521;3473522;3473522;3473522;3474782;3474782;3474782;3474782;3474782;3476062;3476019;3476062;3476062;3476062;3478612;3478026;3478026;3478026;3478612;3478612;3478612;3479590;3479590…	5563	9.7357840304554	9.98031299005852	9.88564940301253	9.87555296110896	9.89306139093585	9.98788911164221	9.86146307142584	9.996492241261	10.0846235538519	9.85433859186604	9.86343625873476	9.50844026575263	1.18470590092908	0.993026110978219	1.06793787273181	1.09811501633802	0.852466495446473	0.781871814737903
ENSG00000272088.1	RP11-168F9.2	gene_type lincRNA	chr1	3487246	3487627	382	3.55782624462725	4.11690410408451	3.55782624462725	4.17289735623919	3.99376167689582	3.9399101021215	4.4868859099821	4.23386063257747	4.25976969624512	4.14543931115403	4.14636171533227	4.40124077151475	1.47332719628631	1.53163349069426	0.963361000009112	0.83913493452665	0.923810990428444	1.19323570766262
ENSG00000162591.15	MEGF6	gene_type protein_coding	chr1;chr1;chr1;chr1;chr1;chr1;chr1;chr1;chr1;chr1;chr1;chr1;chr1;chr1;chr1;chr1;chr1;chr1;chr1;chr1;chr1;chr1;chr1;chr1;chr1;chr1;chr1;chr1;chr1;chr1;chr1;chr1;chr1;chr1;chr1;chr1;chr1;chr1;chr1;chr1;chr1;chr1;chr1;chr1;chr1;chr1;chr1;chr1;chr1;chr1;chr1;chr1;chr1;chr1;chr1;chr1;chr1;chr1;chr1;chr1;chr1;chr1;chr1;chr1;chr1;chr1;chr1;chr1;chr1;chr1;chr1;chr1;chr1;chr1;chr1;chr1;chr1;chr1;chr1;chr1…	3489920;3489926;3490312;3490562;3490912;3490912;3490912;3490925;3492639;3492639;3492639;3492639;3492639;3492639;3492728;3493771;3493771;3493771;3493771;3493771;3493996;3493996;3493996;3493996;3493996;3494371;3494371;3494371;3494371;3494371;3494613;3494613;3494613;3494613;3495890;3495890;3495890;3495890;3495890;3496655;3496655;3496655;3496655;3496988;3496988;3497233;3497233;3497233;3497491;3498371…	3490589;3490589;3490589;3490589;3490959;3490959;3490959;3490959;3492767;3492767;3492767;3492767;3493486;3492767;3492767;3493899;3493899;3493899;3493899;3493797;3494244;3494124;3494124;3494124;3494124;3494741;3494499;3494499;3494499;3494499;3494741;3494741;3494741;3494741;3496018;3496014;3496018;3496018;3496018;3496717;3496783;3496783;3496783;3497119;3497119;3497361;3497361;3497361;3497621;3498499…	7039	7.25625189639692	8.47672149007603	7.51955219310053	7.86883131722496	7.93078826804055	8.13674238317395	8.3097381924486	8.30519814447528	8.02213809991954	7.76176903830484	6.8422879799115	7.23838315003787	2.33022553217416	1.2739239227694	1.15344891907307	0.996858024915028	0.834874319554667	1.31594133074227
ENSG00000207776.1	MIR551A	gene_type miRNA	chr1	3560695	3560790	96	3.95230142254003	3.55782624462725	3.55782624462725	3.55782624462725	3.55782624462725	3.55782624462725	3.55782624462725	3.55782624462725	3.55782624462725	3.55782624462725	3.55782624462725	3.55782624462725	0.760766076973291	1	1	1	1	1
ENSG00000238260.1	RP11-46F15.2	gene_type antisense	chr1;chr1;chr1	3623190;3624308;3624632	3623556;3624450;3624743	622	3.95230142254003	4.11690410408451	4.13206609265227	3.55782624462725	3.55782624462725	3.9399101021215	4.1514250525846	4.23386063257747	4.54119739532673	4.14543931115403	3.97541602041241	4.15839371305164	1.12085735121679	0.67164004343305	1.30322289775605	1.05880402183728	0.760089871873339	1.13522454884573
ENSG00000158109.14	TPRG1L	gene_type protein_coding	chr1;chr1;chr1;chr1;chr1;chr1;chr1;chr1;chr1	3625002;3625050;3625424;3625424;3625713;3627500;3627500;3628409;3628409	3625273;3625273;3625515;3625515;3625889;3627653;3627653;3630127;3630127	2414	9.13432522733347	9.33054481749323	9.18007166946466	9.45402407327928	9.23074531168695	9.73707835718431	9.25908679285798	9.72437481912016	9.18374279631219	9.27738563950832	9.22782044297466	9.29196850270296	1.14569226858175	1.20911578504097	1.42043522752729	1.38059295380102	1.06706114130133	1.04546738807294
ENSG00000116213.15	WRAP73	gene_type protein_coding	chr1;chr1;chr1;chr1;chr1;chr1;chr1;chr1;chr1;chr1;chr1;chr1;chr1;chr1;chr1;chr1;chr1;chr1;chr1;chr1;chr1;chr1;chr1;chr1;chr1;chr1;chr1;chr1;chr1;chr1;chr1;chr1;chr1;chr1;chr1;chr1;chr1;chr1;chr1;chr1;chr1;chr1;chr1;chr1;chr1;chr1;chr1;chr1;chr1;chr1;chr1;chr1;chr1;chr1;chr1;chr1;chr1;chr1;chr1;chr1	3630767;3630767;3631466;3631886;3632213;3632213;3632213;3632766;3633310;3633398;3633398;3633398;3634916;3634997;3634997;3634997;3634997;3634997;3635014;3635160;3635160;3635160;3635160;3635160;3635160;3635272;3635944;3635944;3635944;3635944;3635944;3636995;3636995;3636995;3636995;3636995;3636995;3638750;3638750;3638750;3638750;3638750;3638750;3646666;3646666;3646666;3646666;3646666;3647246;3647408…	3631117;3631657;3631657;3637098;3632338;3632338;3632338;3633503;3633503;3633503;3633503;3633503;3635074;3635074;3635074;3635074;3635074;3635074;3635074;3635294;3635433;3635294;3635450;3635294;3635294;3635294;3636030;3636030;3636030;3636030;3636030;3637098;3637098;3637057;3637098;3637098;3637098;3638822;3638822;3638822;3639625;3638822;3638822;3646782;3646782;3646782;3646782;3646782;3647560;3647560…	7604	8.22215391968019	8.70144625892588	8.44034580840727	8.67574943249876	8.44373115601546	8.88237660109718	8.2677040704329	8.71727092185027	8.48270065777566	8.54223097776518	8.00839405531973	8.4394875664075	1.39405969413376	1.17723604754063	1.35533120137645	1.36563018423827	1.04212643366269	1.3482551186853
ENSG00000078900.14	TP73	gene_type protein_coding	chr1;chr1;chr1;chr1;chr1;chr1;chr1;chr1;chr1;chr1;chr1;chr1;chr1;chr1;chr1;chr1;chr1;chr1;chr1;chr1;chr1;chr1;chr1;chr1;chr1;chr1;chr1;chr1;chr1;chr1;chr1;chr1;chr1;chr1;chr1;chr1;chr1;chr1;chr1;chr1;chr1;chr1;chr1;chr1;chr1;chr1;chr1;chr1;chr1;chr1;chr1;chr1;chr1;chr1;chr1;chr1;chr1;chr1;chr1;chr1;chr1;chr1;chr1;chr1;chr1;chr1;chr1;chr1;chr1;chr1;chr1;chr1;chr1;chr1;chr1;chr1;chr1;chr1;chr1;chr1…	3652520;3652520;3652565;3652565;3652565;3682333;3682333;3682333;3682333;3682333;3682366;3682366;3683060;3683060;3683060;3683060;3683060;3683060;3683060;3690672;3690672;3690672;3690707;3698046;3698058;3707549;3707549;3707549;3707549;3707549;3707549;3707549;3707549;3707549;3707549;3707549;3707549;3707549;3722021;3722021;3722021;3722021;3722021;3722021;3722021;3722021;3722021;3722021;3722021;3722021…	3652641;3652641;3652641;3652641;3652641;3682430;3682430;3682430;3682430;3682430;3682430;3682430;3683180;3683180;3683180;3683180;3683180;3683180;3683180;3690944;3690944;3690944;3690944;3698151;3698151;3708534;3707791;3707791;3707791;3707791;3707791;3707791;3707791;3707791;3707791;3707791;3707791;3707791;3722207;3722207;3722207;3722207;3722207;3722207;3722207;3722207;3722207;3722207;3722207;3722207…	6763	6.73354870273418	7.70824342125338	7.01450372263409	7.28828468148188	7.81726126850606	8.2865169292686	7.16897599523002	7.54663078656315	7.32293235873875	7.37788217238188	7.29276904424145	7.98194466052583	1.96522530159386	1.20897210637496	1.38439502370049	1.29922814541005	1.03882296562102	1.61236192052351
ENSG00000227589.1	RP5-1092A11.5	gene_type antisense	chr1;chr1;chr1	3658938;3662153;3668625	3659430;3662265;3668772	754	3.55782624462725	3.95438272415751	3.55782624462725	3.99438106532615	3.99376167689582	3.9399101021215	3.55782624462725	4.11146652358321	3.55782624462725	4.14543931115403	3.55782624462725	3.9840131269933	1.3163621772543	1.35336859919879	0.963361000009112	1.4677846135353	1.50275838144031	1.34367747037693
ENSG00000235131.1	RP5-1092A11.2	gene_type antisense	chr1;chr1	3712200;3714187	3712438;3714298	351	3.55782624462725	3.55782624462725	3.55782624462725	3.55782624462725	3.55782624462725	3.55782624462725	3.55782624462725	3.55782624462725	3.55782624462725	3.55782624462725	3.55782624462725	3.55782624462725	1	1	1	1	1	1
ENSG00000227372.11	TP73-AS1	gene_type transcribed_unitary_pseudogene	chr1;chr1;chr1;chr1;chr1;chr1;chr1;chr1;chr1;chr1;chr1;chr1;chr1;chr1;chr1;chr1;chr1;chr1;chr1;chr1;chr1;chr1;chr1;chr1;chr1;chr1;chr1;chr1;chr1;chr1;chr1;chr1;chr1;chr1;chr1;chr1;chr1;chr1;chr1;chr1;chr1;chr1;chr1;chr1;chr1;chr1	3735601;3735984;3735984;3736175;3736926;3737149;3737594;3737781;3738075;3738434;3738447;3739059;3740137;3740233;3740233;3740233;3740233;3740233;3740275;3741220;3742430;3742804;3742804;3742804;3742804;3742804;3742804;3742804;3742804;3743061;3743061;3743061;3743061;3743061;3743061;3743061;3743280;3743301;3745607;3745607;3745607;3745607;3745607;3746287;3746437;3746528	3736588;3740387;3737854;3736558;3737103;3737854;3738513;3737875;3738513;3738513;3738513;3739216;3740387;3740387;3740387;3740387;3740387;3740387;3740387;3741373;3742517;3742911;3742957;3742911;3742858;3742960;3742957;3742911;3742911;3743190;3743261;3743190;3743190;3743190;3743190;3743190;3743370;3743371;3746186;3746186;3747336;3747322;3746181;3746776;3747023;3746742	7209	3.55782624462725	3.55782624462725	3.55782624462725	3.55782624462725	3.55782624462725	3.55782624462725	3.55782624462725	3.55782624462725	3.55782624462725	4.14543931115403	3.55782624462725	3.55782624462725	1	1	1	1	1.50275838144031	1
ENSG00000276189.1	TP73-AS1	gene_type misc_RNA	chr1	3736943	3737103	161	3.55782624462725	3.55782624462725	3.55782624462725	3.55782624462725	3.55782624462725	3.55782624462725	3.55782624462725	3.55782624462725	3.55782624462725	3.55782624462725	3.55782624462725	3.55782624462725	1	1	1	1	1	1
ENSG00000162592.9	CCDC27	gene_type protein_coding	chr1;chr1;chr1;chr1;chr1;chr1;chr1;chr1;chr1;chr1;chr1;chr1;chr1;chr1;chr1;chr1;chr1;chr1;chr1;chr1;chr1;chr1;chr1;chr1;chr1;chr1;chr1;chr1;chr1;chr1	3746460;3747814;3751332;3752398;3752445;3752475;3754118;3754118;3754118;3755457;3755457;3755457;3756733;3756752;3761281;3761281;3762620;3762620;3762967;3763108;3763706;3763706;3766535;3766535;3767233;3767233;3769783;3769783;3771401;3771401	3746691;3747958;3751457;3752799;3752799;3752799;3754241;3754241;3754241;3755567;3757189;3755567;3756890;3756890;3761430;3761430;3762712;3762712;3763474;3763474;3763836;3763836;3766612;3766612;3767445;3767445;3769887;3769887;3771645;3771644	4285	4.2369208620727	4.11690410408451	4.36473673247505	4.30835738787737	4.51847424846376	4.21583248886372	4.28233509801111	4.23386063257747	3.96574265195466	4.14543931115403	4.14636171533227	4.40124077151475	0.92017696201517	0.961674557133983	0.810766418995482	0.966958269516835	1.13264571037339	1.19323570766262
ENSG00000235169.7	SMIM1	gene_type protein_coding	chr1;chr1;chr1;chr1;chr1;chr1;chr1;chr1	3772788;3772825;3773063;3773063;3775299;3775299;3775299;3775795	3772841;3773181;3773181;3773181;3775670;3775483;3775388;3775982	954	6.0976697243358	5.92275158978681	6.39735787075149	6.31094880601786	5.88577282417488	5.91414599676902	5.73611613320015	6.23376986894811	6.14729770756855	6.69244004154503	5.80332779688444	5.66805469524307	0.885817783234984	0.941864177924487	1.01986144984753	1.41191548692727	1.45916429594578	0.910497460442552
ENSG00000130764.9	LRRC47	gene_type protein_coding	chr1;chr1;chr1;chr1;chr1;chr1;chr1;chr1;chr1;chr1;chr1;chr1;chr1;chr1;chr1;chr1	3778558;3781135;3781290;3781512;3781512;3781512;3782661;3782661;3782661;3783770;3783996;3783996;3783996;3785087;3786849;3795862	3781336;3781336;3781336;3781601;3781601;3781601;3782763;3782763;3782763;3783911;3784175;3784047;3784111;3785203;3787310;3796504	4516	9.58913510185247	10.2255409546214	9.86239379129028	10.2026680422641	9.88812047459759	10.2969983993885	9.91683936331464	10.3508958514413	10.235165711488	10.2524830816087	9.59342064589836	9.79405696426751	1.55445176775643	1.26599723247342	1.3276528128435	1.35102698240185	1.0120758172334	1.14920511426454
ENSG00000266075.2	RN7SL574P	gene_type misc_RNA	chr1	3782815	3783111	297	3.55782624462725	4.11690410408451	3.96520609223261	3.55782624462725	3.99376167689582	4.09661836972613	4.4868859099821	4.3361324333863	3.96574265195466	3.97475709050258	3.55782624462725	4.29078246946898	1.47332719628631	0.753991493562934	1.07389779287468	0.900779889265218	1.0062678942155	1.66204129172233
ENSG00000272153.1	RP1-286D6.5	gene_type antisense	chr1	3785008	3785538	531	4.50974017200837	5.033364466576	4.86796115633572	4.95589460197784	5.01143118136676	5.10796161153328	5.16434554452006	5.22502373618048	4.81218729988587	4.89686259953378	4.38456570337338	4.73474544680533	1.43756211537612	1.06284664202294	1.06919902726959	1.04295592526598	1.06044904440221	1.27471943300358
ENSG00000116198.12	CEP104	gene_type protein_coding	chr1;chr1;chr1;chr1;chr1;chr1;chr1;chr1;chr1;chr1;chr1;chr1;chr1;chr1;chr1;chr1;chr1;chr1;chr1;chr1;chr1;chr1;chr1;chr1;chr1;chr1;chr1;chr1;chr1;chr1;chr1;chr1;chr1;chr1;chr1;chr1;chr1;chr1;chr1;chr1;chr1;chr1;chr1;chr1;chr1;chr1;chr1;chr1;chr1;chr1;chr1;chr1;chr1;chr1;chr1;chr1;chr1;chr1;chr1;chr1;chr1;chr1;chr1;chr1;chr1;chr1;chr1;chr1;chr1;chr1;chr1;chr1;chr1;chr1;chr1;chr1;chr1	3812081;3815239;3816149;3816280;3816280;3822776;3823174;3823174;3823424;3823424;3823424;3825758;3825758;3825758;3826370;3826370;3826370;3826708;3826708;3826708;3829266;3829266;3829266;3829692;3829791;3831046;3831046;3831091;3833671;3833862;3833862;3834925;3834925;3834925;3835062;3836495;3836495;3836495;3836915;3837292;3837292;3837292;3838964;3838964;3838964;3839083;3839608;3839608;3839608;3839757…	3815517;3815517;3816370;3816458;3816370;3823241;3823241;3823241;3823562;3823562;3823562;3825866;3825866;3825866;3826436;3826436;3826436;3826744;3826744;3826744;3829373;3829306;3829373;3829997;3829997;3831224;3831222;3831222;3834035;3834035;3834035;3835092;3835092;3835092;3835092;3836692;3836692;3836692;3837136;3837345;3837519;3837519;3839110;3839119;3839119;3839119;3839776;3839776;3839776;3839776…	7876	9.15241479697209	9.37403666683713	9.29311715718208	9.44505361467226	9.29935849819535	9.42282487535798	9.2920450359212	9.45876825692664	9.27267663030394	9.14982392520641	8.76012870517703	8.96721956667577	1.1660437098673	1.11105979171382	1.08934911014741	1.12250605022342	0.918369920370968	1.15435811715384
ENSG00000169598.15	DFFB	gene_type protein_coding	chr1;chr1;chr1;chr1;chr1;chr1;chr1;chr1;chr1;chr1;chr1;chr1;chr1;chr1;chr1;chr1;chr1;chr1;chr1;chr1;chr1;chr1;chr1;chr1;chr1;chr1;chr1;chr1;chr1;chr1;chr1;chr1;chr1;chr1;chr1;chr1;chr1;chr1;chr1;chr1;chr1;chr1;chr1;chr1;chr1;chr1;chr1;chr1;chr1;chr1;chr1;chr1;chr1;chr1;chr1;chr1;chr1;chr1;chr1;chr1;chr1;chr1;chr1;chr1;chr1;chr1;chr1;chr1;chr1;chr1;chr1	3857267;3857267;3857281;3857281;3857460;3857473;3857473;3857517;3857600;3857604;3858718;3858718;3858718;3858718;3858718;3858718;3858718;3858718;3858718;3858718;3860420;3860420;3865643;3865762;3865762;3865812;3865812;3865812;3865812;3865812;3866284;3867663;3867974;3867974;3867974;3867974;3867974;3867974;3867974;3867974;3869605;3869605;3869605;3869605;3869605;3869605;3869605;3869605;3869605;3872472…	3857717;3857717;3857717;3857717;3857717;3857717;3857717;3857717;3857717;3857717;3858851;3858866;3858844;3858844;3858844;3858866;3858844;3858844;3858866;3858844;3860506;3860490;3866000;3866000;3866000;3866000;3866000;3866000;3866000;3866000;3866398;3868053;3868053;3868053;3868053;3868053;3868053;3868053;3868053;3868053;3869775;3869775;3869775;3869775;3869775;3869775;3869775;3869775;3869775;3872545…	3870	6.76956417833018	7.03158773698622	6.39735787075149	6.93525673779359	6.51374318046395	7.13489246761358	7.22891813571016	7.25326196339188	6.787098824276	6.32658419128104	6.51708066517037	6.75744495211869	1.19915949544533	1.4518565011601	1.53809998249482	1.0170170231514	0.726726976979992	1.18129090500927
ENSG00000198912.10	C1orf174	gene_type protein_coding	chr1;chr1;chr1;chr1;chr1;chr1;chr1;chr1;chr1;chr1;chr1;chr1	3889125;3889125;3889125;3890569;3890569;3890569;3892883;3892883;3895295;3900172;3900172;3900172	3890073;3890073;3890073;3892996;3891057;3891057;3892996;3892996;3896183;3900293;3900247;3900285	4388	7.89097706815021	7.83847082398279	8.1543117263014	8.18173880439885	7.99360274232149	7.93066630327421	8.00875941322313	8.19698465883169	8.01685781463623	7.99301030243625	7.57544060566424	7.55003705144476	0.964259764804157	1.01919286156704	0.957313633724094	1.13936124993797	0.983606032235969	0.982545719987064
ENSG00000236423.5	LINC01134	gene_type lincRNA	chr1;chr1;chr1;chr1;chr1;chr1;chr1;chr1;chr1	3900372;3900404;3900416;3903965;3903965;3905231;3913692;3914395;3914395	3900631;3900631;3900631;3904036;3904036;3905532;3914290;3915447;3917225	4064	4.33963517379083	4.24046069271801	4.13206609265227	3.99438106532615	4.42012488630275	4.5518999672019	4.28233509801111	4.57853741794673	4.61674007229362	4.63926676564394	4.64091134249155	4.29078246946898	0.933567031497705	0.908976544746804	1.09564094047358	1.2279078705626	1.01573685434752	0.784514015720427
ENSG00000233304.6	LINC01346	gene_type lincRNA	chr1;chr1;chr1;chr1;chr1;chr1;chr1;chr1;chr1	3940565;3940613;3940617;3940994;3940994;3940994;3945188;3949027;3952253	3940698;3940698;3940698;3941143;3941143;3941143;3945462;3949351;3955262	3894	3.55782624462725	3.55782624462725	3.55782624462725	3.55782624462725	3.99376167689582	3.9399101021215	3.55782624462725	3.55782624462725	3.55782624462725	4.27507766239493	3.55782624462725	3.55782624462725	1	1	0.963361000009112	1	1.64404685687777	1
ENSG00000226374.2	LINC01345	gene_type lincRNA	chr1;chr1;chr1;chr1;chr1;chr1;chr1;chr1;chr1;chr1;chr1;chr1;chr1	3944547;3944561;3945494;3946320;3946320;3947149;3947275;3947957;3947957;3947957;3948863;3948863;3948863	3945141;3945141;3945669;3946463;3946463;3947328;3947328;3948595;3948595;3948595;3948980;3948900;3948900	1852	3.55782624462725	3.55782624462725	4.13206609265227	4.17289735623919	3.55782624462725	3.9399101021215	3.97903344337653	3.55782624462725	3.96574265195466	4.27507766239493	3.55782624462725	3.55782624462725	1	1.0287063842134	1.30322289775605	0.746799466090436	1.2391364061538	1
ENSG00000229280.1	EEF1DP6	gene_type processed_pseudogene	chr1	4175528	4175899	372	3.55782624462725	3.55782624462725	3.55782624462725	3.55782624462725	3.55782624462725	3.55782624462725	3.55782624462725	3.55782624462725	3.55782624462725	3.55782624462725	3.55782624462725	3.55782624462725	1	1	1	1	1	1
ENSG00000235054.3	LINC01777	gene_type lincRNA	chr1;chr1;chr1;chr1;chr1;chr1;chr1;chr1;chr1;chr1;chr1;chr1;chr1;chr1;chr1;chr1;chr1;chr1;chr1;chr1;chr1;chr1;chr1;chr1;chr1	4412027;4412051;4412124;4412161;4415553;4415553;4415553;4415553;4416311;4416312;4416312;4416312;4416312;4422760;4422760;4422876;4423054;4423348;4423348;4423348;4423348;4423994;4423994;4423994;4423994	4412349;4412632;4412349;4412349;4415587;4415587;4415587;4415587;4416548;4416548;4416548;4416548;4416548;4422877;4423187;4423187;4423187;4423448;4423448;4423448;4423448;4424689;4424687;4424687;4424689	2104	3.55782624462725	3.55782624462725	3.55782624462725	3.55782624462725	3.55782624462725	3.55782624462725	3.55782624462725	3.55782624462725	3.55782624462725	4.27507766239493	3.55782624462725	3.55782624462725	1	1	1	1	1.64404685687777	1
ENSG00000227169.2	RP1-37J18.1	gene_type lincRNA	chr1;chr1	4551735;4552105	4552049;4552145	356	3.55782624462725	3.55782624462725	3.55782624462725	3.55782624462725	3.55782624462725	3.55782624462725	3.55782624462725	3.55782624462725	3.55782624462725	3.97475709050258	3.55782624462725	3.55782624462725	1	1	1	1	1.33508430584895	1
ENSG00000232596.2	LINC01646	gene_type lincRNA	chr1;chr1;chr1;chr1;chr1;chr1;chr1;chr1;chr1;chr1;chr1	4571481;4571504;4571548;4572470;4572470;4582277;4582277;4583083;4583339;4583342;4593052	4571629;4571629;4571629;4572592;4572592;4582574;4582574;4583178;4583421;4583708;4594009	1994	3.55782624462725	3.55782624462725	3.55782624462725	3.55782624462725	3.55782624462725	3.55782624462725	3.55782624462725	3.55782624462725	3.55782624462725	3.97475709050258	3.55782624462725	3.55782624462725	1	1	1	1	1.33508430584895	1
ENSG00000196581.10	AJAP1	gene_type protein_coding	chr1;chr1;chr1;chr1;chr1;chr1;chr1;chr1;chr1;chr1;chr1;chr1;chr1;chr1	4654732;4655045;4711155;4711900;4711900;4711900;4769853;4769853;4772280;4772280;4774427;4774427;4777401;4782545	4655454;4655454;4711186;4712165;4712699;4712699;4769940;4769940;4772525;4772525;4774558;4774558;4777794;4792534	12405	4.42933801147896	4.65626681633109	4.61539758452791	4.83079477478604	4.17203110618318	4.40257149830365	4.85082485685873	4.82325282634	5.28344478245251	5.5332049179967	4.14636171533227	4.15839371305164	1.17034088522952	1.16102351328867	1.17327434180061	0.981069991157301	1.18900941223269	1.00837481952175
ENSG00000231510.1	RP11-542C10.1	gene_type lincRNA	chr1;chr1;chr1;chr1	5086459;5088251;5090580;5090733	5086569;5088373;5090627;5090899	449	3.55782624462725	3.55782624462725	3.55782624462725	3.55782624462725	3.55782624462725	3.55782624462725	3.55782624462725	3.55782624462725	3.55782624462725	3.55782624462725	3.55782624462725	3.55782624462725	1	1	1	1	1	1
ENSG00000260972.1	RP1-58B11.1	gene_type lincRNA	chr1	5492978	5494674	1697	3.55782624462725	3.55782624462725	3.55782624462725	3.55782624462725	3.55782624462725	3.55782624462725	3.55782624462725	3.55782624462725	3.55782624462725	3.55782624462725	3.55782624462725	3.55782624462725	1	1	1	1	1	1
ENSG00000283356.1	RP3-491M17.1	gene_type unprocessed_pseudogene	chr1	5554747	5554881	135	3.55782624462725	3.55782624462725	3.55782624462725	3.55782624462725	3.55782624462725	3.55782624462725	3.55782624462725	3.55782624462725	3.55782624462725	3.55782624462725	3.55782624462725	3.55782624462725	1	1	1	1	1	1
ENSG00000236948.2	RP11-154H17.1	gene_type lincRNA	chr1;chr1;chr1;chr1;chr1	5561709;5563170;5587368;5668141;5668141	5562254;5563355;5587575;5668295;5668255	1095	3.55782624462725	3.55782624462725	3.55782624462725	3.55782624462725	3.55782624462725	3.55782624462725	3.55782624462725	3.55782624462725	3.55782624462725	3.55782624462725	3.55782624462725	3.55782624462725	1	1	1	1	1	1
ENSG00000264341.1	MIR4417	gene_type miRNA	chr1	5564071	5564143	73	3.55782624462725	3.55782624462725	3.55782624462725	3.55782624462725	3.55782624462725	3.55782624462725	3.55782624462725	3.55782624462725	3.55782624462725	3.55782624462725	3.55782624462725	3.55782624462725	1	1	1	1	1	1
ENSG00000264101.1	MIR4689	gene_type miRNA	chr1	5862672	5862741	70	3.55782624462725	3.55782624462725	3.55782624462725	3.55782624462725	3.55782624462725	3.55782624462725	3.55782624462725	3.55782624462725	3.55782624462725	3.55782624462725	3.55782624462725	3.55782624462725	1	1	1	1	1	1
ENSG00000131697.17	NPHP4	gene_type protein_coding	chr1;chr1;chr1;chr1;chr1;chr1;chr1;chr1;chr1;chr1;chr1;chr1;chr1;chr1;chr1;chr1;chr1;chr1;chr1;chr1;chr1;chr1;chr1;chr1;chr1;chr1;chr1;chr1;chr1;chr1;chr1;chr1;chr1;chr1;chr1;chr1;chr1;chr1;chr1;chr1;chr1;chr1;chr1;chr1;chr1;chr1;chr1;chr1;chr1;chr1;chr1;chr1;chr1;chr1;chr1;chr1;chr1;chr1;chr1;chr1;chr1;chr1;chr1;chr1;chr1;chr1;chr1;chr1;chr1;chr1;chr1;chr1;chr1;chr1;chr1;chr1;chr1;chr1;chr1;chr1…	5862811;5862811;5862811;5862813;5862818;5863265;5863890;5863890;5863890;5863890;5864338;5864338;5864338;5864338;5864338;5865102;5865102;5865102;5865102;5866373;5866373;5866373;5866373;5867030;5867030;5867030;5867030;5867030;5867030;5867082;5867740;5867740;5867740;5867740;5867740;5867740;5873252;5873252;5873252;5873252;5873252;5874471;5874471;5874471;5874471;5874874;5874874;5874874;5874874;5874905…	5863405;5866458;5864033;5863405;5863405;5863405;5864033;5864033;5864033;5864033;5864517;5864517;5864517;5864517;5866458;5865273;5865273;5865273;5865273;5866458;5866458;5866458;5866458;5867115;5867115;5867115;5867115;5867115;5867652;5867115;5867896;5867896;5867896;5867896;5867896;5868375;5873841;5873335;5873335;5873335;5873335;5874657;5874657;5874657;5874657;5875100;5875100;5875100;5875100;5875100…	13167	7.29769576240547	8.0190223997512	7.70807419379324	7.86209231937764	7.7313478861274	8.2074992649726	7.77510043442655	8.19698465883169	7.7879452184353	7.78144251277877	7.56027289524114	7.70890389439286	1.64869740553185	1.11266409967243	1.39102792157976	1.33967608974124	0.995502810684786	1.10851707982375
ENSG00000069424.14	KCNAB2	gene_type protein_coding	chr1;chr1;chr1;chr1;chr1;chr1;chr1;chr1;chr1;chr1;chr1;chr1;chr1;chr1;chr1;chr1;chr1;chr1;chr1;chr1;chr1;chr1;chr1;chr1;chr1;chr1;chr1;chr1;chr1;chr1;chr1;chr1;chr1;chr1;chr1;chr1;chr1;chr1;chr1;chr1;chr1;chr1;chr1;chr1;chr1;chr1;chr1;chr1;chr1;chr1;chr1;chr1;chr1;chr1;chr1;chr1;chr1;chr1;chr1;chr1;chr1;chr1;chr1;chr1;chr1;chr1;chr1;chr1;chr1;chr1;chr1;chr1;chr1;chr1;chr1;chr1;chr1;chr1;chr1;chr1…	5991466;5992363;5992673;5992701;5992706;5992711;5995863;6007439;6018635;6026013;6026013;6026300;6026300;6026320;6027297;6034283;6035917;6040517;6040517;6040517;6040517;6040517;6040517;6040517;6040517;6040517;6040517;6040517;6040517;6040517;6040618;6041168;6041831;6041831;6041831;6041831;6041831;6041831;6041831;6041831;6041831;6045921;6046114;6051511;6072755;6072755;6072755;6072755;6072755;6072755…	5991556;5992788;5992788;5992788;5992788;5992788;5996084;6007660;6018835;6026445;6026445;6026445;6026445;6026445;6027459;6034794;6036048;6040645;6040645;6040645;6040645;6040645;6040645;6040645;6040645;6040645;6040645;6040645;6040645;6040645;6040645;6041762;6041872;6041872;6041872;6041872;6041872;6041872;6041872;6041872;6041872;6046183;6046183;6051754;6072798;6072798;6072798;6072798;6072798;6072798…	9534	7.29769576240547	7.88851642037548	7.84523437535672	7.97256332127934	7.52539835367634	7.636581664267	7.64956215448276	7.97795050276839	8.19569491289281	8.24498067287546	7.23651273326185	7.38034540355975	1.50610323066751	1.09226956348738	1.0801137916894	1.25560993404171	1.03475251850906	1.10483633390808
ENSG00000116254.17	CHD5	gene_type protein_coding	chr1;chr1;chr1;chr1;chr1;chr1;chr1;chr1;chr1;chr1;chr1;chr1;chr1;chr1;chr1;chr1;chr1;chr1;chr1;chr1;chr1;chr1;chr1;chr1;chr1;chr1;chr1;chr1;chr1;chr1;chr1;chr1;chr1;chr1;chr1;chr1;chr1;chr1;chr1;chr1;chr1;chr1;chr1;chr1;chr1;chr1;chr1;chr1;chr1;chr1;chr1;chr1;chr1;chr1;chr1;chr1;chr1;chr1;chr1;chr1;chr1;chr1;chr1;chr1;chr1;chr1;chr1;chr1;chr1;chr1;chr1;chr1;chr1;chr1;chr1;chr1;chr1;chr1;chr1;chr1…	6101793;6105081;6105081;6105083;6105091;6106234;6106234;6106234;6106234;6106234;6106395;6106395;6106616;6106616;6106616;6106616;6106616;6109795;6109795;6109795;6109795;6110394;6110394;6110394;6110394;6111775;6111775;6111775;6111775;6112140;6112140;6112140;6112140;6112909;6112909;6112909;6112909;6113311;6121105;6121105;6121105;6121105;6121494;6121494;6121494;6121494;6123948;6123948;6123948;6124517…	6105427;6105427;6105427;6105427;6105427;6106287;6106287;6106287;6106287;6106287;6106509;6106509;6106779;6106779;6106779;6106772;6106779;6109990;6109990;6109990;6109990;6110526;6110526;6110526;6110526;6111883;6111883;6111883;6111883;6112277;6112277;6112277;6112277;6112998;6112998;6112998;6112998;6113416;6121237;6121237;6121237;6121237;6121573;6121573;6121573;6121573;6124107;6124107;6124107;6124661…	9890	6.3109292393801	6.90680847255916	6.66659412443886	6.97352066354959	7.18017361158548	7.51027757543097	7.12756488060071	7.46260323382991	7.03881105448472	6.85111707008863	6.89190679670877	7.01237891368179	1.51139340551593	1.2370694864846	1.25710396099322	1.2614109422798	0.878008015522307	1.08709055095495
ENSG00000116251.9	RPL22	gene_type protein_coding	chr1;chr1;chr1;chr1;chr1;chr1;chr1;chr1;chr1;chr1;chr1;chr1;chr1;chr1;chr1;chr1;chr1;chr1;chr1;chr1;chr1;chr1;chr1;chr1;chr1;chr1;chr1;chr1;chr1;chr1;chr1;chr1	6181269;6185020;6186575;6186615;6186692;6186723;6192927;6192930;6192930;6192930;6192930;6192930;6192930;6192930;6197652;6197652;6197652;6197652;6197652;6197652;6197652;6197652;6199370;6199562;6200489;6200489;6200489;6203367;6208681;6208681;6209135;6209135	6181486;6186816;6186816;6186816;6186816;6186816;6193054;6193054;6193054;6193054;6193054;6193054;6193054;6193054;6197756;6197756;6197756;6197756;6197756;6199563;6197756;6197757;6199553;6199612;6200727;6200750;6200842;6203494;6208739;6208739;6209389;6209244	4900	12.8366149121247	12.3327402025134	12.4442603698382	12.3073164698445	12.3066058149391	12.2968681252266	12.3722647763468	12.2749805763775	12.4912166778206	12.5731049882096	12.108537578724	11.8779177553157	0.705210221338693	0.909443615338566	0.993273075569262	0.934791032876547	1.05840245300186	0.852268653900517
ENSG00000226944.1	RP1-120G22.11	gene_type antisense	chr1;chr1;chr1	6204840;6205206;6205754	6204982;6205413;6205780	378	4.50974017200837	4.5882780818109	4.25885812962813	4.17289735623919	4.30730794355666	4.67900310144742	4.85082485685873	4.92614825130183	5.24416739203629	4.95223473808129	4.84032743934117	4.66234229816799	1.05594735492084	0.942156890627973	1.29387222981399	1.0535971837747	0.816807119365513	0.88393663499303
ENSG00000158286.12	RNF207	gene_type protein_coding	chr1;chr1;chr1;chr1;chr1;chr1;chr1;chr1;chr1;chr1;chr1;chr1;chr1;chr1;chr1;chr1;chr1;chr1;chr1;chr1;chr1;chr1;chr1;chr1;chr1;chr1;chr1;chr1;chr1;chr1;chr1;chr1;chr1;chr1;chr1;chr1;chr1;chr1;chr1;chr1;chr1;chr1;chr1;chr1;chr1;chr1;chr1;chr1;chr1;chr1;chr1;chr1;chr1;chr1	6205475;6206129;6206176;6206196;6206536;6206536;6206536;6207379;6207379;6207379;6208618;6208860;6208881;6209115;6209115;6209268;6209268;6209414;6209414;6209924;6209924;6209924;6210223;6210223;6210223;6210370;6210370;6210370;6210870;6210902;6210938;6211021;6211021;6211035;6211867;6211867;6211867;6211867;6211923;6212218;6212231;6212231;6212682;6212682;6212682;6212738;6213066;6213066;6218289;6218289…	6206101;6206302;6206302;6206302;6206726;6206726;6206726;6207511;6207564;6208307;6209025;6209025;6209025;6209196;6209196;6209539;6209343;6209539;6209539;6209970;6209970;6209970;6210295;6210295;6210295;6210438;6210900;6210438;6210938;6210938;6211118;6211118;6211118;6211118;6211916;6212053;6212053;6212053;6212053;6212416;6212416;6212416;6212836;6213183;6212733;6212903;6213183;6213183;6218369;6218369…	6585	6.45167743397486	6.75792489984793	6.53845306567941	6.16183512123717	6.99503697794061	6.6836291694681	7.63490971883216	7.48407736518135	7.25253339138267	6.67837308376517	6.69609131351363	6.56299354887644	1.23648733774125	0.770241123048488	0.805855007217994	0.900730641904823	0.671677074124883	0.911871370204883
ENSG00000116237.15	ICMT	gene_type protein_coding	chr1;chr1;chr1;chr1;chr1;chr1;chr1;chr1;chr1;chr1;chr1;chr1;chr1;chr1;chr1;chr1;chr1	6221193;6221898;6223438;6223491;6224599;6231902;6231902;6231902;6233474;6233474;6234405;6234886;6234886;6234886;6235717;6235717;6235717	6225262;6222160;6223502;6225262;6225262;6232119;6232119;6232119;6233643;6233643;6234511;6234974;6234974;6234974;6235972;6235972;6235940	4910	10.9011046197188	11.2836371161238	11.1825366063227	11.3000611997668	11.0260358761401	11.3447214256509	10.8535419655788	11.1355014701268	11.2014969880389	11.1602140786367	10.9299860303396	10.9052935405113	1.30362822764446	1.08487181872806	1.24719370336105	1.21584515477158	0.971790403282227	0.983030108895365
ENSG00000225077.2	LINC00337	gene_type lincRNA	chr1;chr1;chr1;chr1;chr1;chr1;chr1	6236240;6236966;6237245;6237771;6237814;6238221;6238221	6236336;6237150;6237345;6237848;6237848;6238940;6239444	1685	5.61698141271606	5.62636208486135	5.67485767635021	5.83225814781407	5.3055413352739	5.22034689138195	4.90976689934899	5.26202784332806	5.78549155127821	5.49977873281882	4.77825682765974	4.98112808775494	1.00652337155519	1.11527576032833	0.942657477644585	1.27655964258935	0.82033619030847	1.15098677763183
ENSG00000173673.7	HES3	gene_type protein_coding	chr1;chr1;chr1;chr1	6244192;6244351;6244548;6245110	6244241;6244446;6244629;6245578	697	3.55782624462725	3.55782624462725	3.55782624462725	3.55782624462725	3.55782624462725	3.9399101021215	3.55782624462725	3.55782624462725	3.55782624462725	3.55782624462725	3.55782624462725	3.55782624462725	1	1	1.30322289775605	1	1	1
ENSG00000158292.6	GPR153	gene_type protein_coding	chr1;chr1;chr1;chr1;chr1;chr1	6247346;6250440;6251338;6253718;6254550;6260825	6250003;6250624;6251530;6254147;6255014;6260975	4082	6.76956417833018	8.12017005362047	7.09713674195821	7.75701461958269	7.70152696668501	8.16630043347398	7.90889689515138	8.36411561965562	8.03264080900865	7.80084981224489	7.31103861598842	7.62029060036813	2.55019201033246	1.57994887732074	1.38010063179887	1.37099064274858	0.851577066786227	1.23906509679798
ENSG00000097021.19	ACOT7	gene_type protein_coding	chr1;chr1;chr1;chr1;chr1;chr1;chr1;chr1;chr1;chr1;chr1;chr1;chr1;chr1;chr1;chr1;chr1;chr1;chr1;chr1;chr1;chr1;chr1;chr1;chr1;chr1;chr1;chr1;chr1;chr1;chr1;chr1;chr1;chr1;chr1;chr1;chr1;chr1;chr1;chr1;chr1;chr1;chr1;chr1;chr1;chr1;chr1;chr1;chr1;chr1;chr1;chr1;chr1;chr1;chr1;chr1;chr1;chr1;chr1;chr1;chr1;chr1;chr1;chr1;chr1;chr1;chr1;chr1;chr1;chr1;chr1;chr1;chr1;chr1;chr1;chr1;chr1;chr1;chr1;chr1…	6264269;6264273;6264273;6264273;6264273;6264273;6264273;6264273;6281102;6281102;6281102;6281102;6281102;6281102;6281102;6281102;6281130;6281253;6282724;6282724;6282724;6294864;6294864;6294864;6294864;6294864;6294864;6294864;6294864;6294864;6294864;6318492;6318492;6318492;6318492;6318492;6318492;6318492;6318492;6318492;6327299;6327299;6327299;6327299;6327299;6327299;6327299;6327299;6327299;6333477…	6264695;6264695;6264695;6264695;6264695;6264695;6264695;6264695;6281286;6281286;6281286;6281286;6281286;6281286;6281286;6281286;6281286;6281286;6282796;6282888;6282796;6295504;6294980;6294980;6294980;6294980;6294980;6294980;6294980;6294980;6294980;6318578;6318578;6318578;6318578;6318578;6318578;6318578;6318578;6318578;6327413;6327413;6327413;6327413;6327413;6327413;6327413;6327413;6327413;6333568…	4124	10.1877269848791	10.1180476209049	10.2154458168227	10.2727744847073	10.1812240569558	10.3224986349081	9.67060493814366	9.88972099908788	10.1071156761494	9.95711382018438	9.64267972192163	9.35720362900552	0.952849743422141	1.04053728975124	1.10287904627087	1.16402017293458	0.901249303191689	0.820470806743658
ENSG00000271746.1	RP1-202O8.3	gene_type antisense	chr1	6393555	6394391	837	3.55782624462725	3.55782624462725	3.55782624462725	3.55782624462725	3.55782624462725	3.55782624462725	3.55782624462725	3.55782624462725	3.55782624462725	3.55782624462725	3.55782624462725	3.55782624462725	1	1	1	1	1	1
ENSG00000069812.11	HES2	gene_type protein_coding	chr1;chr1;chr1;chr1;chr1;chr1;chr1;chr1;chr1;chr1;chr1;chr1;chr1;chr1;chr1;chr1;chr1;chr1;chr1	6412418;6413000;6413050;6415232;6416516;6418414;6418849;6419241;6419607;6419607;6419607;6419607;6419607;6419776;6419776;6419776;6419776;6419776;6424478	6413282;6413282;6413282;6419153;6416631;6419153;6419340;6419340;6419702;6419702;6419702;6419702;6419702;6419917;6419919;6419907;6419903;6419843;6424670	5407	6.13560130155741	5.75806862724559	5.95327066375507	5.57943254312057	6.36712677019885	6.15911615840472	6.73005272728442	6.36529121299314	6.70988158630159	6.28970651343388	6.36594377501976	5.7866411734875	0.769752912284612	0.771726675209103	0.865730197587318	0.776597240338784	0.747333928897195	0.669287232509743
ENSG00000187017.15	ESPN	gene_type protein_coding	chr1;chr1;chr1;chr1;chr1;chr1;chr1;chr1;chr1;chr1;chr1;chr1;chr1;chr1;chr1;chr1;chr1;chr1;chr1;chr1;chr1;chr1;chr1;chr1;chr1;chr1;chr1;chr1;chr1;chr1;chr1;chr1;chr1;chr1;chr1;chr1;chr1;chr1;chr1;chr1;chr1;chr1;chr1;chr1;chr1;chr1;chr1;chr1;chr1;chr1;chr1;chr1;chr1;chr1;chr1;chr1;chr1;chr1;chr1;chr1;chr1;chr1;chr1;chr1;chr1;chr1;chr1;chr1;chr1;chr1;chr1;chr1;chr1;chr1;chr1;chr1;chr1;chr1;chr1;chr1…	6424788;6424788;6428226;6428226;6437300;6437568;6440254;6440254;6440254;6440254;6440378;6440626;6440626;6440626;6440626;6440659;6440934;6440934;6440934;6444481;6444481;6444481;6445664;6445664;6445664;6447331;6447351;6448043;6448043;6448467;6448520;6448641;6448641;6448641;6448641;6448641;6448641;6448641;6448641;6448893;6448893;6448893;6448893;6449055;6450374;6450444;6451317;6451603;6451603;6451603…	6425249;6425249;6428419;6428419;6437506;6437747;6440440;6440440;6440440;6440440;6440440;6440797;6440822;6440808;6440808;6440808;6441065;6441065;6441065;6444682;6444682;6444682;6445757;6445935;6445935;6447459;6447459;6448117;6448117;6448561;6448561;6448802;6448802;6448802;6449037;6448802;6448802;6449091;6449091;6448958;6449091;6449056;6449091;6449091;6450470;6450470;6451370;6451748;6451748;6451748…	6943	8.7507591882662	9.64971221387066	9.33173690639065	9.81243875153454	9.42295467843577	9.71299637299822	9.69192691212361	9.87899953765106	10.2765445901779	9.89543153443311	8.53110675000768	8.97020208416738	1.86471225653744	1.39542234908461	1.22267561307939	1.13845133747719	0.767844960882925	1.35575391287747
ENSG00000265392.1	MIR4252	gene_type miRNA	chr1	6429834	6429896	63	3.55782624462725	3.55782624462725	3.55782624462725	3.55782624462725	3.55782624462725	3.55782624462725	3.55782624462725	3.55782624462725	3.55782624462725	3.55782624462725	3.55782624462725	3.9840131269933	1	1	1	1	1	1.34367747037693
ENSG00000231868.1	RP1-202O8.2	gene_type antisense	chr1;chr1;chr1	6443034;6445562;6446912	6443169;6445681;6447006	351	4.2369208620727	4.51461706795932	3.96520609223261	4.30835738787737	3.55782624462725	4.48066070093918	4.28233509801111	4.23386063257747	4.45830789965566	4.14543931115403	3.97541602041241	3.9840131269933	1.21225752222756	1.26852442269663	1.89583637786822	0.966958269516835	0.805039463321382	1.00597685070739
ENSG00000215788.9	TNFRSF25	gene_type protein_coding	chr1;chr1;chr1;chr1;chr1;chr1;chr1;chr1;chr1;chr1;chr1;chr1;chr1;chr1;chr1;chr1;chr1;chr1;chr1;chr1;chr1;chr1;chr1;chr1;chr1;chr1;chr1;chr1;chr1;chr1;chr1;chr1;chr1;chr1;chr1;chr1;chr1;chr1;chr1;chr1;chr1;chr1;chr1;chr1;chr1;chr1;chr1;chr1;chr1;chr1;chr1;chr1;chr1;chr1;chr1;chr1;chr1;chr1;chr1;chr1;chr1;chr1;chr1;chr1;chr1;chr1;chr1;chr1;chr1;chr1;chr1;chr1;chr1;chr1;chr1;chr1;chr1;chr1;chr1;chr1…	6461151;6461151;6461151;6461151;6461151;6461151;6461204;6461434;6461434;6461434;6461434;6461434;6461434;6461480;6461756;6461994;6461994;6461994;6461994;6461994;6461994;6461994;6461994;6461994;6461994;6461994;6461994;6461994;6461994;6461994;6461994;6462319;6462629;6462629;6462629;6462629;6462629;6462629;6462629;6462629;6462629;6462629;6462629;6462629;6462629;6462629;6462637;6462863;6462863;6462863…	6461762;6461762;6461762;6461762;6461762;6461762;6461762;6461762;6461762;6461762;6461762;6461762;6461762;6461762;6461762;6462174;6462174;6462174;6462174;6462174;6462174;6462174;6462174;6462174;6462174;6462174;6462174;6462174;6462174;6462174;6462174;6462607;6462666;6462663;6462663;6462663;6462666;6462663;6462666;6462663;6462666;6462666;6462666;6462666;6462666;6462666;6462663;6462970;6462956;6463347…	3918	5.56048467032638	6.69619857629882	6.06286003663717	6.60135298877501	6.36712677019885	6.58577070113122	6.48771681734293	6.74700414536412	6.77451961014628	6.44842805883461	5.56853453782041	6.42834706205504	2.19727266120183	1.45245448195131	1.16363930315439	1.19688731229962	0.797694617672178	1.81480246481892
ENSG00000171680.21	PLEKHG5	gene_type protein_coding	chr1;chr1;chr1;chr1;chr1;chr1;chr1;chr1;chr1;chr1;chr1;chr1;chr1;chr1;chr1;chr1;chr1;chr1;chr1;chr1;chr1;chr1;chr1;chr1;chr1;chr1;chr1;chr1;chr1;chr1;chr1;chr1;chr1;chr1;chr1;chr1;chr1;chr1;chr1;chr1;chr1;chr1;chr1;chr1;chr1;chr1;chr1;chr1;chr1;chr1;chr1;chr1;chr1;chr1;chr1;chr1;chr1;chr1;chr1;chr1;chr1;chr1;chr1;chr1;chr1;chr1;chr1;chr1;chr1;chr1;chr1;chr1;chr1;chr1;chr1;chr1;chr1;chr1;chr1;chr1…	6466092;6466092;6466092;6466092;6466092;6466092;6467122;6467122;6467122;6467122;6467122;6467122;6467825;6467825;6467825;6467825;6467825;6467825;6467825;6467825;6467825;6467825;6467825;6467825;6468099;6469042;6469042;6469042;6469042;6469042;6469042;6469042;6469042;6469042;6469042;6469042;6469042;6469335;6469335;6469335;6469335;6469335;6469335;6469335;6469335;6469335;6469335;6469335;6469335;6469544…	6467572;6467572;6467572;6467572;6467572;6467572;6467572;6467572;6467572;6467572;6467572;6467572;6467893;6468586;6468586;6468586;6467898;6468586;6468586;6468586;6468586;6468586;6468586;6468586;6468586;6469241;6469241;6469241;6469241;6469241;6469241;6469241;6469241;6469241;6469241;6469241;6469241;6469450;6469450;6469450;6469450;6469450;6469450;6469450;6469450;6469450;6469450;6469450;6469450;6469676…	7053	6.68404814973303	7.77483455243811	6.90394668637132	7.60374294067099	7.1583075459264	7.56214383883038	7.15873564418723	7.92147820229313	7.2434840426839	7.42041208844368	6.92801098837402	7.21834056804253	2.12990104230033	1.62427538699156	1.32302130404542	1.69671300623507	1.13047418345573	1.22291961836821
ENSG00000162408.10	NOL9	gene_type protein_coding	chr1;chr1;chr1;chr1;chr1;chr1;chr1;chr1;chr1;chr1;chr1;chr1;chr1;chr1;chr1;chr1;chr1;chr1;chr1;chr1;chr1;chr1;chr1	6521347;6526696;6528994;6531968;6531995;6532229;6532463;6532463;6533280;6533280;6533280;6541830;6541830;6544826;6544826;6545045;6549256;6549362;6549571;6550396;6550396;6554107;6554107	6526003;6526829;6529171;6532079;6532079;6532760;6532760;6532760;6533385;6533441;6533441;6541927;6541927;6545017;6544922;6545180;6549698;6549698;6549698;6550488;6550615;6554500;6554535	7293	8.34926247514257	8.9646758610135	8.42453822364562	9.06356123016642	8.76828321032528	9.14638489234876	8.72645295867	9.05169564708819	8.99288176018219	8.71553117978065	8.04692168860928	8.46086209981336	1.53199690839171	1.55727421562933	1.29963065798636	1.25287517804848	0.825104880513808	1.33231979407739
ENSG00000253022.1	RNU6-731P	gene_type snRNA	chr1	6540854	6540964	111	3.55782624462725	3.95438272415751	3.55782624462725	3.55782624462725	3.55782624462725	3.55782624462725	3.55782624462725	3.55782624462725	3.96574265195466	3.55782624462725	3.55782624462725	3.55782624462725	1.3163621772543	1	1	1	0.753711125063102	1
ENSG00000229519.2	RP11-58A11.2	gene_type processed_pseudogene	chr1;chr1	6547905;6548448	6548133;6548619	401	4.2369208620727	4.11690410408451	3.96520609223261	3.99438106532615	3.55782624462725	4.21583248886372	3.97903344337653	3.55782624462725	4.36577948478197	4.14543931115403	4.27619612797294	3.55782624462725	0.92017696201517	1.02042841145107	1.57790051111954	0.746799466090436	0.858363018822708	0.607783795817753
ENSG00000173662.20	TAS1R1	gene_type protein_coding	chr1;chr1;chr1;chr1;chr1;chr1;chr1;chr1;chr1;chr1;chr1;chr1;chr1;chr1;chr1;chr1;chr1;chr1	6555181;6555309;6570909;6570909;6570941;6570941;6574631;6574631;6576415;6576415;6576415;6576950;6576950;6576950;6578653;6578653;6578653;6579296	6555564;6555564;6571215;6571215;6571215;6571215;6575392;6575392;6576627;6576627;6576627;6577070;6577070;6577070;6579426;6579757;6579626;6579426	2892	3.95230142254003	3.95438272415751	3.55782624462725	3.99438106532615	3.55782624462725	3.55782624462725	3.97903344337653	3.55782624462725	3.96574265195466	4.56224313213017	4.38456570337338	3.55782624462725	1.00144368946577	1.35336859919879	1	0.746799466090436	1.51204437524897	0.563802015822352
ENSG00000204859.12	ZBTB48	gene_type protein_coding	chr1;chr1;chr1;chr1;chr1;chr1;chr1;chr1;chr1;chr1;chr1;chr1;chr1;chr1;chr1;chr1;chr1;chr1;chr1;chr1;chr1;chr1;chr1;chr1;chr1;chr1;chr1;chr1;chr1;chr1;chr1;chr1;chr1;chr1;chr1;chr1;chr1;chr1;chr1;chr1;chr1;chr1	6580001;6580017;6580048;6580088;6580541;6580541;6580541;6582058;6582058;6582058;6582058;6585302;6585919;6585919;6586207;6586695;6586695;6587205;6587205;6587205;6587256;6587478;6587478;6587478;6587478;6587515;6588060;6588060;6588060;6588060;6588060;6588278;6588278;6588278;6588687;6588756;6588756;6588756;6588916;6588916;6588916;6588916	6580049;6580070;6580136;6580136;6581299;6581299;6581299;6582299;6582299;6582245;6582299;6586787;6586030;6586030;6587291;6586787;6586787;6587291;6587291;6587291;6587291;6587632;6587632;6587632;6587632;6587632;6588196;6588196;6589280;6588105;6588196;6588442;6588442;6588442;6588844;6588844;6588844;6588844;6589280;6589160;6589280;6589280	4503	7.61832848063947	7.70203347484441	7.70151679193319	7.69006256886925	7.6320710408976	7.8856500458974	7.66406626385124	8.16198100905619	8.12386309779	7.98737871858095	7.22691700120658	7.38034540355975	1.05973606382947	0.992091971864049	1.19216093529939	1.41217095091818	0.90973333339679	1.11220937448146
ENSG00000162413.16	KLHL21	gene_type protein_coding	chr1;chr1;chr1;chr1;chr1;chr1;chr1;chr1;chr1;chr1;chr1;chr1;chr1;chr1;chr1;chr1;chr1;chr1;chr1;chr1;chr1	6590724;6590724;6593193;6593205;6593381;6594081;6595485;6595485;6595485;6595485;6599047;6599047;6599047;6599047;6599047;6599750;6601797;6601797;6603454;6614450;6614450	6595557;6593658;6593658;6594918;6593658;6594110;6595557;6595557;6595557;6595557;6599452;6599452;6599452;6599452;6599452;6599816;6602869;6603001;6603684;6614607;6614560	6901	7.71914917049297	9.47372116075127	8.51314858409953	9.37593492152795	8.60512156773847	9.45393104963486	8.65944282253004	9.46952955808062	8.87544568263527	9.37102128051309	8.17665672378387	8.62888434583541	3.3742619810711	1.8185471575338	1.80101410731565	1.75331684975325	1.40988314972898	1.36815114771992
ENSG00000116273.5	PHF13	gene_type protein_coding	chr1;chr1;chr1;chr1;chr1;chr1	6613685;6613762;6616757;6619803;6621411;6622192	6614105;6614105;6616858;6620337;6624033;6622645	3681	9.14113544722111	9.54809603900285	9.2667836666733	9.33767043564434	9.23853226545086	9.57990463814285	9.24713097135028	9.73481881450295	9.5199935062223	9.51276143430056	8.87150659696326	8.98207080869443	1.32588954220916	1.05036210229877	1.26696122572254	1.40219582381139	0.994999653303639	1.07965038553617
ENSG00000041988.15	THAP3	gene_type protein_coding	chr1;chr1;chr1;chr1;chr1;chr1;chr1;chr1;chr1;chr1;chr1;chr1;chr1;chr1;chr1;chr1;chr1;chr1;chr1;chr1;chr1;chr1;chr1;chr1;chr1;chr1;chr1;chr1;chr1;chr1;chr1;chr1;chr1;chr1	6624866;6625150;6625171;6625181;6625192;6625198;6625225;6625230;6627763;6628395;6628499;6628499;6628499;6628499;6628499;6629643;6630288;6630288;6630288;6630288;6630288;6630288;6630291;6632370;6632391;6632391;6632391;6632391;6632391;6632796;6632796;6632796;6632796;6634020	6624954;6625292;6625292;6625292;6625292;6625292;6625292;6625292;6628519;6628691;6628691;6628691;6628691;6628691;6628691;6629724;6630326;6630353;6630353;6630353;6630353;6630353;6630353;6632495;6633051;6632495;6632495;6632495;6632495;6633121;6633273;6633368;6633565;6635586	4072	7.38484467753058	7.39812055443221	7.2311089895576	7.49453098334374	7.41012800654647	7.46329905650487	7.15873564418723	7.58023648191489	7.7817273396499	7.5097488335869	7.34689070082116	6.92827811744586	1.00924460647433	1.20032242990501	1.03754294326619	1.33932012696901	0.828182999895448	0.748143756294748
ENSG00000007923.15	DNAJC11	gene_type protein_coding	chr1;chr1;chr1;chr1;chr1;chr1;chr1;chr1;chr1;chr1;chr1;chr1;chr1;chr1;chr1;chr1;chr1;chr1;chr1;chr1;chr1;chr1;chr1;chr1;chr1;chr1;chr1;chr1;chr1;chr1;chr1;chr1;chr1;chr1;chr1;chr1;chr1;chr1;chr1;chr1;chr1;chr1;chr1;chr1;chr1;chr1;chr1;chr1;chr1;chr1;chr1;chr1;chr1;chr1;chr1;chr1;chr1;chr1;chr1;chr1;chr1;chr1;chr1;chr1;chr1;chr1;chr1;chr1;chr1;chr1;chr1;chr1;chr1;chr1;chr1;chr1;chr1;chr1;chr1;chr1…	6634168;6634168;6634168;6635113;6636117;6636117;6636117;6637198;6637198;6637198;6637301;6637447;6637447;6637447;6637447;6638083;6638295;6638295;6639902;6639902;6639902;6644558;6644558;6644558;6644558;6645041;6645041;6645041;6645041;6645789;6645789;6645800;6645871;6645876;6651017;6651529;6651529;6651529;6651529;6652829;6652829;6652829;6652829;6652829;6652914;6653809;6653911;6653911;6653911;6653911…	6635700;6634784;6635700;6635700;6636246;6636246;6636246;6637340;6637340;6637340;6637340;6637504;6637504;6637504;6638364;6638364;6638364;6638364;6640057;6640057;6640057;6644674;6644674;6644674;6644674;6645112;6645126;6645126;6645057;6645978;6645978;6645978;6645978;6645978;6651180;6651602;6651602;6651602;6651602;6652951;6652951;6652951;6652951;6652951;6652951;6654039;6654039;6654039;6654039;6654039…	5083	9.21399825101301	9.59896620519366	9.47471820151121	9.7094591941667	9.52622432060496	9.7286246769514	9.17828172698202	9.69104959309248	9.64312109421918	9.66487861456291	9.00590676771374	9.23111867496548	1.3058307810406	1.17669546586975	1.1506111504022	1.42678491334426	1.0151954584766	1.16894893457799
ENSG00000228750.6	LINC01672	gene_type lincRNA	chr1;chr1;chr1;chr1;chr1;chr1;chr1;chr1;chr1;chr1;chr1;chr1	6724637;6724637;6724670;6724673;6724777;6725937;6727081;6727433;6727433;6729720;6729720;6729720	6724850;6724850;6724850;6724855;6724850;6727408;6727444;6727612;6727612;6729989;6730012;6730012	2188	3.55782624462725	3.95438272415751	3.55782624462725	3.55782624462725	3.55782624462725	3.55782624462725	3.55782624462725	3.55782624462725	3.55782624462725	3.55782624462725	3.55782624462725	3.55782624462725	1.3163621772543	1	1	1	1	1
ENSG00000237436.1	RP11-312B8.1	gene_type antisense	chr1;chr1;chr1	6783892;6784149;6784658	6784045;6784223;6784843	415	5.07041031878843	4.88822384368833	4.86796115633572	4.95589460197784	5.06598405694916	5.10796161153328	5.25214772098662	5.10644675818101	4.75132975326967	5.00489975279983	4.77825682765974	4.73474544680533	0.881366229825752	1.06284664202294	1.02952406599794	0.903940073129201	1.1921534937159	0.970290477512222
ENSG00000171735.18	CAMTA1	gene_type protein_coding	chr1;chr1;chr1;chr1;chr1;chr1;chr1;chr1;chr1;chr1;chr1;chr1;chr1;chr1;chr1;chr1;chr1;chr1;chr1;chr1;chr1;chr1;chr1;chr1;chr1;chr1;chr1;chr1;chr1;chr1;chr1;chr1;chr1;chr1;chr1;chr1;chr1;chr1;chr1;chr1;chr1;chr1;chr1;chr1;chr1;chr1;chr1;chr1;chr1;chr1;chr1;chr1;chr1;chr1;chr1;chr1;chr1;chr1;chr1;chr1;chr1;chr1;chr1;chr1;chr1;chr1;chr1;chr1;chr1;chr1;chr1;chr1;chr1;chr1;chr1;chr1;chr1;chr1;chr1;chr1…	6785324;6785454;6785464;6785480;6785491;6785518;6785552;6806983;6806988;6820181;6820181;6820181;6820181;6820181;6825092;6825092;6825092;6825092;6825092;6825092;6825092;6825092;6825110;6853048;6853052;6853095;6871757;6871757;6871757;6871757;6871757;6871757;6871757;6871757;6871757;6874056;6886240;6886240;6886240;6887654;6887654;6887654;6887654;6887654;6887654;6887654;7091304;7249491;7467830;7640400…	6785575;6785575;6785575;6785575;6785575;6785575;6785575;6807088;6807088;6820250;6820250;6820250;6820250;6820250;6825210;6825210;6825210;6825210;6825210;6825210;6825210;6825210;6825210;6853189;6853189;6853189;6871840;6872045;6871840;6871840;6871858;6872019;6872038;6871840;6872053;6874423;6886346;6886346;6886346;6887842;6888150;6888193;6888188;6887787;6887865;6888201;7091371;7249626;7467901;7640553…	10033	9.33969423339452	9.13295617768741	9.12249064612274	9.0723278708029	9.00586790908375	9.15902611754707	9.05201842292693	9.25407436701369	8.80071067026559	9.13209970773576	8.90480455759204	8.67349748803671	0.866494167953553	0.965827351129247	1.11200109481744	1.15033649964325	1.25822421911997	0.851862761562246
ENSG00000227950.1	RP11-312B8.2	gene_type processed_pseudogene	chr1	6834333	6834618	286	3.55782624462725	3.55782624462725	3.55782624462725	3.55782624462725	3.55782624462725	3.55782624462725	3.97903344337653	3.55782624462725	3.55782624462725	3.55782624462725	3.55782624462725	3.55782624462725	1	1	1	0.746799466090436	1	1
ENSG00000237365.1	RP11-334N17.1	gene_type antisense	chr1;chr1	7008376;7014251	7008695;7014279	349	3.55782624462725	3.55782624462725	3.55782624462725	3.55782624462725	3.55782624462725	3.55782624462725	3.55782624462725	3.55782624462725	3.55782624462725	3.97475709050258	3.55782624462725	3.55782624462725	1	1	1	1	1.33508430584895	1
ENSG00000207056.1	RNU1-8P	gene_type snRNA	chr1	7219360	7219524	165	3.55782624462725	3.55782624462725	3.55782624462725	3.55782624462725	3.55782624462725	3.55782624462725	3.55782624462725	3.55782624462725	3.55782624462725	3.55782624462725	3.55782624462725	3.55782624462725	1	1	1	1	1	1
ENSG00000237402.1	CAMTA1-IT1	gene_type sense_intronic	chr1;chr1	7368942;7370081	7369116;7370270	365	3.55782624462725	3.95438272415751	3.55782624462725	3.55782624462725	3.55782624462725	3.55782624462725	3.55782624462725	4.11146652358321	3.55782624462725	3.55782624462725	3.97541602041241	3.55782624462725	1.3163621772543	1	1	1.4677846135353	1	0.748674345507322
ENSG00000237728.2	RP3-453P22.2	gene_type antisense	chr1;chr1;chr1;chr1;chr1	7382487;7388183;7389340;7389340;7389659	7382723;7388493;7389419;7389439;7389754	744	3.55782624462725	3.55782624462725	3.55782624462725	3.55782624462725	3.55782624462725	3.9399101021215	3.55782624462725	3.55782624462725	3.55782624462725	3.55782624462725	3.55782624462725	3.55782624462725	1	1	1.30322289775605	1	1	1
ENSG00000225126.1	RP4-549F15.1	gene_type antisense	chr1;chr1	7441096;7441280	7441181;7441554	361	4.11398763489342	4.11690410408451	3.55782624462725	3.55782624462725	4.30730794355666	4.09661836972613	3.55782624462725	3.95050242154829	3.96574265195466	4.27507766239493	3.55782624462725	4.15839371305164	1.00202358709141	1	0.864124101865836	1.31282641920024	1.2391364061538	1.51631287442669
ENSG00000270171.1	RP11-338N10.1	gene_type lincRNA	chr1	7693124	7694844	1721	4.11398763489342	3.55782624462725	3.96520609223261	3.99438106532615	3.99376167689582	3.9399101021215	4.1514250525846	3.95050242154829	3.55782624462725	3.97475709050258	3.55782624462725	3.55782624462725	0.680109340014304	1.02042841145107	0.963361000009112	0.869994007565042	1.33508430584895	1
ENSG00000270035.1	RP11-338N10.2	gene_type lincRNA	chr1	7698303	7698872	570	4.2369208620727	3.95438272415751	4.13206609265227	4.17289735623919	3.99376167689582	4.09661836972613	4.1514250525846	4.3361324333863	4.13281753800557	4.14543931115403	4.14636171533227	4.15839371305164	0.822143344825728	1.0287063842134	1.07389779287468	1.13658641810945	1.00878712860413	1.00837481952175
ENSG00000269978.1	RP11-338N10.3	gene_type lincRNA	chr1	7700704	7700970	267	4.42933801147896	4.34368653389374	4.53994339918289	4.42132383357474	3.99376167689582	3.55782624462725	4.1514250525846	4.50552303053715	3.55782624462725	4.14543931115403	3.97541602041241	3.9840131269933	0.942358898955103	0.921068548221088	0.73921429838892	1.27818616589353	1.50275838144031	1.00597685070739
ENSG00000049245.12	VAMP3	gene_type protein_coding	chr1;chr1;chr1;chr1;chr1;chr1;chr1;chr1;chr1;chr1;chr1;chr1	7771269;7772707;7773442;7773442;7777097;7777160;7777160;7778118;7778118;7778118;7779626;7779626	7771385;7773198;7773511;7773511;7777318;7777318;7777318;7778169;7778169;7778169;7779806;7781432	2760	10.1533441381619	9.96617506650962	10.1388869058062	10.0289875750493	9.97301161412708	10.0354985181424	10.0562585922342	9.99896998911832	9.98962994869033	9.9657141131605	9.50738769314608	9.6748504824008	0.878327529651673	0.92665272016584	1.04426430313277	0.96106865272092	0.98355945160306	1.12308162761992
ENSG00000269925.1	RP3-467L1.6	gene_type sense_intronic	chr1	7776383	7776775	393	3.95230142254003	4.34368653389374	3.96520609223261	4.30835738787737	4.6064747281835	3.9399101021215	3.97903344337653	4.23386063257747	4.13281753800557	4.27507766239493	4.14636171533227	3.55782624462725	1.3116520983895	1.26852442269663	0.630005083100339	1.19319280987744	1.10363271203371	0.665017646772281
ENSG00000049246.14	PER3	gene_type protein_coding	chr1;chr1;chr1;chr1;chr1;chr1;chr1;chr1;chr1;chr1;chr1;chr1;chr1;chr1;chr1;chr1;chr1;chr1;chr1;chr1;chr1;chr1;chr1;chr1;chr1;chr1;chr1;chr1;chr1;chr1;chr1;chr1;chr1;chr1;chr1;chr1;chr1;chr1;chr1;chr1;chr1;chr1;chr1;chr1;chr1;chr1;chr1;chr1;chr1;chr1;chr1;chr1;chr1;chr1;chr1;chr1;chr1;chr1;chr1;chr1;chr1;chr1;chr1;chr1;chr1;chr1;chr1;chr1;chr1;chr1;chr1;chr1;chr1;chr1;chr1;chr1;chr1;chr1;chr1;chr1…	7784320;7784429;7784429;7784654;7784654;7784654;7784654;7784703;7785441;7785441;7785441;7785441;7785441;7785523;7786721;7786721;7786721;7786721;7786721;7786721;7787198;7787322;7788045;7788045;7788045;7788045;7788045;7788045;7793957;7793957;7793957;7793960;7793960;7798525;7798525;7798525;7798525;7798525;7801113;7801113;7801113;7801113;7801113;7803047;7803047;7803047;7803047;7803047;7803051;7803692…	7784376;7784468;7784468;7785005;7785005;7785005;7785005;7785005;7785586;7785586;7785586;7785586;7785586;7785586;7786836;7786836;7786836;7786836;7786836;7786836;7787246;7788570;7788338;7788246;7788246;7788246;7788246;7788246;7794008;7794008;7794008;7794008;7794008;7798673;7798673;7798673;7798673;7798673;7801191;7801191;7801191;7801191;7801191;7803153;7803153;7803153;7803153;7803153;7803153;7803848…	8099	7.8076339317469	8.20592935563941	7.80299825969881	7.82791436087318	7.87848021755576	7.76927353489991	7.82109933305482	7.60656442888634	7.50034236237589	7.42041208844368	7.34689070082116	7.4677069189994	1.31794980363519	1.01742052307062	0.927097719511093	0.861823949620609	0.946103371200844	1.08734986686847
ENSG00000236266.1	RP3-467L1.4	gene_type antisense	chr1;chr1;chr1	7810242;7811489;7827104	7810716;7811604;7827342	830	4.2369208620727	3.55782624462725	3.96520609223261	4.30835738787737	3.55782624462725	3.55782624462725	4.39158453445309	3.95050242154829	3.55782624462725	3.97475709050258	4.38456570337338	3.55782624462725	0.624557100645793	1.26852442269663	1	0.736581918176769	1.33508430584895	0.563802015822352
ENSG00000049247.13	UTS2	gene_type protein_coding	chr1;chr1;chr1;chr1;chr1;chr1;chr1;chr1;chr1;chr1;chr1;chr1;chr1;chr1;chr1;chr1	7843083;7846692;7847614;7847766;7847804;7849640;7849640;7849640;7850812;7850812;7850812;7852901;7852901;7852901;7853307;7853307	7843950;7846766;7847882;7847882;7847882;7849683;7849683;7849683;7850922;7850922;7850922;7852923;7853035;7853118;7853431;7853512	1791	3.55782624462725	3.55782624462725	3.55782624462725	3.55782624462725	3.55782624462725	3.55782624462725	3.55782624462725	3.55782624462725	3.55782624462725	3.55782624462725	3.55782624462725	3.55782624462725	1	1	1	1	1	1
ENSG00000049249.8	TNFRSF9	gene_type protein_coding	chr1;chr1;chr1;chr1;chr1;chr1;chr1;chr1;chr1;chr1;chr1;chr1;chr1;chr1;chr1;chr1;chr1;chr1;chr1;chr1;chr1;chr1;chr1;chr1;chr1	7915894;7919847;7921800;7933127;7933162;7933162;7933162;7935013;7935013;7935013;7935013;7936460;7937690;7937690;7937690;7938193;7938193;7938193;7938721;7938721;7939895;7939895;7940784;7940784;7943139	7920923;7920923;7922021;7933296;7933296;7933296;7933296;7935143;7935100;7935143;7935143;7936563;7937756;7937756;7937756;7938304;7938330;7938330;7938828;7938828;7940078;7940078;7940866;7940933;7943165	6331	3.55782624462725	3.55782624462725	3.55782624462725	3.55782624462725	3.99376167689582	3.9399101021215	3.55782624462725	3.55782624462725	3.55782624462725	4.47769828427326	3.55782624462725	3.9840131269933	1	1	0.963361000009112	1	1.89194747904902	1.34367747037693
ENSG00000270330.1	RP5-892F13.2	gene_type processed_pseudogene	chr1	7942372	7942726	355	3.55782624462725	3.55782624462725	3.55782624462725	3.55782624462725	3.55782624462725	3.55782624462725	3.55782624462725	3.55782624462725	3.55782624462725	3.55782624462725	3.55782624462725	3.55782624462725	1	1	1	1	1	1
ENSG00000116288.12	PARK7	gene_type protein_coding	chr1;chr1;chr1;chr1;chr1;chr1;chr1;chr1;chr1;chr1;chr1;chr1;chr1;chr1;chr1;chr1;chr1;chr1;chr1;chr1;chr1;chr1;chr1;chr1;chr1;chr1;chr1;chr1;chr1;chr1;chr1;chr1;chr1;chr1;chr1;chr1;chr1;chr1;chr1;chr1;chr1;chr1;chr1;chr1;chr1;chr1;chr1;chr1;chr1;chr1;chr1;chr1;chr1;chr1;chr1;chr1;chr1;chr1;chr1;chr1;chr1;chr1	7954291;7961663;7961663;7961692;7961701;7961748;7961894;7961969;7962763;7962763;7962763;7962763;7962763;7962763;7962763;7962763;7962767;7965324;7965324;7965324;7965324;7965324;7965324;7965324;7965324;7965324;7965351;7969085;7969345;7969345;7969345;7969345;7969345;7969345;7969345;7969345;7969345;7970894;7970894;7970894;7970894;7970894;7970894;7970894;7970894;7970894;7970894;7971629;7977652;7977652…	7954323;7961793;7961735;7961735;7961735;7961793;7962081;7962101;7962875;7962875;7962875;7962875;7962875;7962875;7962875;7962875;7962875;7965425;7965425;7965425;7965425;7965425;7965425;7965425;7965425;7965425;7965425;7969148;7969404;7969404;7969404;7969404;7969404;7969404;7969404;7969404;7969404;7970963;7970963;7970963;7970963;7971521;7970963;7970963;7970963;7971048;7970963;7971957;7977738;7977738…	2397	12.067733444259	11.6576541899354	12.0022061614573	11.8593925930192	11.7093531437382	11.6730662346901	11.5286024445094	11.6726331376443	11.7201729842948	11.859048267514	11.3945684676774	11.1424480022925	0.752582029543121	0.905751020688759	0.97516151168017	1.10498799301464	1.101046411731	0.839661378088673
ENSG00000200344.1	Y_RNA	gene_type misc_RNA	chr1	7982881	7982983	103	3.55782624462725	3.55782624462725	3.55782624462725	3.99438106532615	4.17203110618318	4.21583248886372	3.55782624462725	3.55782624462725	3.55782624462725	3.97475709050258	3.55782624462725	3.9840131269933	1	1.35336859919879	1.03082639408898	1	1.33508430584895	1.34367747037693
ENSG00000116285.12	ERRFI1	gene_type protein_coding	chr1;chr1;chr1;chr1;chr1;chr1;chr1;chr1;chr1;chr1;chr1;chr1;chr1;chr1;chr1;chr1	8004404;8011719;8013427;8013739;8014040;8015308;8015308;8015495;8015495;8015495;8015495;8015495;8026158;8026158;8026158;8026158	8004558;8014396;8015384;8014396;8014396;8015400;8015384;8015692;8015692;8015633;8015692;8015692;8026296;8026296;8026283;8026308	4186	8.70244804076989	8.91734207784716	9.01846682837535	8.93807772302642	9.02700692805829	9.2602690707372	8.69157335980443	8.76466483554709	8.40809801004371	8.51902506097264	8.25863163505457	8.76566484155704	1.16061866624805	0.945802522501159	1.1754898995964	1.05196847836369	1.07992195280035	1.42112475282421
ENSG00000238290.1	RP11-431K24.1	gene_type lincRNA	chr1;chr1;chr1	8026738;8029227;8121474	8027421;8029357;8122702	2044	4.11398763489342	3.55782624462725	3.55782624462725	3.99438106532615	3.55782624462725	4.09661836972613	3.97903344337653	3.95050242154829	3.55782624462725	3.97475709050258	3.55782624462725	3.9840131269933	0.680109340014304	1.35336859919879	1.45275570996825	0.980418068928156	1.33508430584895	1.34367747037693
ENSG00000232848.1	CTA-215D11.4	gene_type processed_pseudogene	chr1;chr1	8057245;8058361	8057941;8058463	800	3.55782624462725	3.55782624462725	3.55782624462725	3.55782624462725	3.55782624462725	3.55782624462725	3.55782624462725	3.55782624462725	3.55782624462725	4.27507766239493	3.55782624462725	3.9840131269933	1	1	1	1	1.64404685687777	1.34367747037693
ENSG00000229305.1	RP11-431K24.2	gene_type processed_pseudogene	chr1;chr1;chr1;chr1	8189824;8191216;8192182;8192557	8190331;8191495;8192254;8192770	1075	3.55782624462725	3.55782624462725	3.55782624462725	3.55782624462725	3.55782624462725	3.55782624462725	3.55782624462725	3.55782624462725	3.55782624462725	3.55782624462725	3.55782624462725	3.55782624462725	1	1	1	1	1	1
ENSG00000227634.2	LINC01714	gene_type lincRNA	chr1;chr1;chr1;chr1;chr1;chr1;chr1;chr1	8202429;8208667;8208672;8210487;8210487;8214625;8215079;8215079	8202876;8208873;8208873;8210595;8210595;8214678;8215210;8215210	950	3.55782624462725	3.95438272415751	3.55782624462725	3.55782624462725	3.55782624462725	3.55782624462725	3.55782624462725	3.55782624462725	3.55782624462725	3.55782624462725	3.55782624462725	3.55782624462725	1.3163621772543	1	1	1	1	1
ENSG00000200975.1	RNU1-7P	gene_type snRNA	chr1	8206434	8206597	164	3.55782624462725	3.55782624462725	3.55782624462725	3.55782624462725	3.55782624462725	3.55782624462725	3.55782624462725	3.55782624462725	3.55782624462725	3.55782624462725	3.55782624462725	3.55782624462725	1	1	1	1	1	1
ENSG00000233645.1	RP11-431K24.4	gene_type lincRNA	chr1;chr1	8218190;8220397	8218533;8220529	477	3.55782624462725	3.55782624462725	3.55782624462725	3.55782624462725	3.55782624462725	3.55782624462725	3.55782624462725	3.55782624462725	3.55782624462725	3.97475709050258	3.55782624462725	3.55782624462725	1	1	1	1	1.33508430584895	1
ENSG00000251977.1	RNU6-991P	gene_type snRNA	chr1	8292157	8292263	107	3.55782624462725	3.55782624462725	3.55782624462725	3.55782624462725	3.55782624462725	3.55782624462725	3.55782624462725	3.55782624462725	3.55782624462725	3.55782624462725	3.55782624462725	3.55782624462725	1	1	1	1	1	1
ENSG00000162426.14	SLC45A1	gene_type protein_coding	chr1;chr1;chr1;chr1;chr1;chr1;chr1;chr1;chr1;chr1;chr1;chr1;chr1;chr1;chr1;chr1;chr1;chr1;chr1;chr1;chr1;chr1;chr1;chr1;chr1	8317826;8324306;8324330;8325298;8325298;8325818;8325818;8330138;8330209;8330209;8330428;8335437;8335437;8335437;8335437;8336079;8337816;8337816;8337816;8339493;8339493;8339493;8343747;8343747;8343747	8318186;8324726;8324726;8325390;8325390;8326042;8326042;8330936;8330936;8330936;8330936;8335590;8335590;8335590;8335590;8336109;8337992;8337992;8337992;8339698;8339698;8339698;8344167;8344157;8344165	2888	4.11398763489342	4.51461706795932	4.53994339918289	4.17289735623919	4.42012488630275	4.67900310144742	4.57221240555981	4.23386063257747	4.75132975326967	4.7764253630922	4.56377988186717	4.73474544680533	1.32008372415758	0.775368460427013	1.19654795257644	0.79094442133652	1.01754712442455	1.12581171430483
ENSG00000252254.1	Y_RNA	gene_type misc_RNA	chr1	8328067	8328179	113	3.55782624462725	3.55782624462725	3.55782624462725	3.55782624462725	3.55782624462725	3.55782624462725	3.55782624462725	3.55782624462725	3.55782624462725	3.55782624462725	3.55782624462725	3.55782624462725	1	1	1	1	1	1
ENSG00000142599.17	RERE	gene_type protein_coding	chr1;chr1;chr1;chr1;chr1;chr1;chr1;chr1;chr1;chr1;chr1;chr1;chr1;chr1;chr1;chr1;chr1;chr1;chr1;chr1;chr1;chr1;chr1;chr1;chr1;chr1;chr1;chr1;chr1;chr1;chr1;chr1;chr1;chr1;chr1;chr1;chr1;chr1;chr1;chr1;chr1;chr1;chr1;chr1;chr1;chr1;chr1;chr1;chr1;chr1;chr1;chr1;chr1;chr1;chr1;chr1;chr1;chr1;chr1;chr1;chr1;chr1;chr1;chr1;chr1;chr1;chr1;chr1;chr1;chr1;chr1;chr1;chr1;chr1;chr1;chr1;chr1;chr1;chr1;chr1…	8352397;8352406;8352909;8353943;8354093;8354626;8354943;8355419;8355419;8355419;8355419;8355419;8355521;8356100;8356100;8356100;8356100;8356100;8358196;8358196;8358196;8358196;8359764;8359764;8359764;8359764;8360112;8360112;8360112;8360112;8361460;8361763;8361763;8361763;8361763;8361763;8362683;8362683;8362683;8362683;8362683;8363710;8364056;8364056;8364056;8364056;8364056;8364746;8364746;8364746…	8355120;8355120;8353178;8355120;8355120;8355120;8355082;8355599;8355599;8355599;8355599;8355599;8355599;8356246;8356246;8356246;8356246;8356246;8358916;8358916;8358916;8358916;8359986;8359986;8359986;8359986;8361490;8361490;8361490;8361490;8361490;8361876;8361876;8361876;8361876;8361876;8362844;8362844;8362844;8362844;8362844;8364255;8364255;8364255;8364255;8364255;8364255;8364838;8364838;8364838…	11503	9.07154046559912	9.98669378979488	9.57111681765198	9.6106404511442	10.0113839442856	10.1401240677146	10.1745731959349	10.2608595171075	10.4051383918329	9.79444568283707	9.16924861617608	9.31560705155235	1.88576947366517	1.0277744076306	1.09333849371684	1.06163388278485	0.654882185213176	1.10677229482024
ENSG00000232912.5	RP5-1115A15.1	gene_type antisense	chr1;chr1;chr1;chr1;chr1;chr1;chr1	8424645;8425638;8428482;8428482;8429827;8429827;8434633	8424701;8425754;8428588;8428588;8430041;8429972;8434838	702	3.55782624462725	3.95438272415751	4.13206609265227	3.55782624462725	3.55782624462725	3.55782624462725	4.1514250525846	3.55782624462725	4.13281753800557	3.97475709050258	3.97541602041241	3.55782624462725	1.3163621772543	0.67164004343305	1	0.662687766517553	0.896229147663079	0.748674345507322
ENSG00000221083.1	SNORA77	gene_type snoRNA	chr1	8511795	8511919	125	3.55782624462725	3.55782624462725	3.55782624462725	3.55782624462725	3.55782624462725	3.9399101021215	3.55782624462725	3.55782624462725	3.55782624462725	3.55782624462725	3.55782624462725	3.55782624462725	1	1	1.30322289775605	1	1	1
ENSG00000270282.1	RP5-1115A15.2	gene_type processed_pseudogene	chr1	8512653	8513021	369	3.55782624462725	3.55782624462725	3.55782624462725	3.55782624462725	3.99376167689582	3.55782624462725	3.55782624462725	3.55782624462725	3.55782624462725	3.55782624462725	3.55782624462725	3.55782624462725	1	1	0.73921429838892	1	1	1
ENSG00000234619.1	RPL7P11	gene_type processed_pseudogene	chr1	8750430	8751087	658	3.95230142254003	3.55782624462725	3.55782624462725	3.55782624462725	3.99376167689582	3.9399101021215	3.55782624462725	3.95050242154829	3.55782624462725	3.55782624462725	3.55782624462725	3.55782624462725	0.760766076973291	1	0.963361000009112	1.31282641920024	1	1
ENSG00000224315.2	RPL7P7	gene_type processed_pseudogene	chr1	8786211	8786913	703	3.95230142254003	3.95438272415751	3.55782624462725	3.55782624462725	3.55782624462725	3.55782624462725	3.55782624462725	3.55782624462725	3.55782624462725	3.55782624462725	3.55782624462725	3.55782624462725	1.00144368946577	1	1	1	1	1
ENSG00000222511.2	Y_RNA	gene_type misc_RNA	chr1	8796571	8796673	103	3.55782624462725	3.55782624462725	3.55782624462725	3.55782624462725	3.55782624462725	3.55782624462725	3.55782624462725	3.55782624462725	3.55782624462725	3.55782624462725	3.55782624462725	3.55782624462725	1	1	1	1	1	1
ENSG00000226545.1	RP4-633I8.3	gene_type unprocessed_pseudogene	chr1;chr1	8798475;8799309	8798691;8799506	415	3.55782624462725	3.55782624462725	3.55782624462725	3.55782624462725	3.55782624462725	3.55782624462725	3.55782624462725	3.95050242154829	3.96574265195466	3.55782624462725	3.55782624462725	3.55782624462725	1	1	1	1.31282641920024	0.753711125063102	1
ENSG00000228423.2	RP4-633I8.4	gene_type lincRNA	chr1;chr1	8805860;8806779	8805939;8807051	353	3.95230142254003	3.55782624462725	3.55782624462725	3.99438106532615	3.55782624462725	3.55782624462725	3.55782624462725	3.55782624462725	3.55782624462725	3.55782624462725	3.97541602041241	3.55782624462725	0.760766076973291	1.35336859919879	1	1	1	0.748674345507322
ENSG00000229716.2	RPL23AP19	gene_type processed_pseudogene	chr1	8831007	8831375	369	3.55782624462725	3.55782624462725	3.55782624462725	3.55782624462725	3.55782624462725	3.55782624462725	3.55782624462725	3.55782624462725	3.55782624462725	3.55782624462725	3.55782624462725	3.55782624462725	1	1	1	1	1	1
ENSG00000074800.13	ENO1	gene_type protein_coding	chr1;chr1;chr1;chr1;chr1;chr1;chr1;chr1;chr1;chr1;chr1;chr1;chr1;chr1;chr1;chr1;chr1;chr1;chr1;chr1;chr1;chr1;chr1;chr1;chr1;chr1;chr1;chr1;chr1;chr1;chr1;chr1;chr1;chr1;chr1;chr1;chr1	8861002;8861005;8862887;8862887;8863235;8863235;8863891;8863891;8865285;8865285;8866279;8866279;8866361;8867117;8867117;8867117;8867988;8867988;8867988;8870172;8870452;8870452;8870452;8871352;8871891;8871891;8871891;8874824;8874824;8874824;8874824;8874856;8878215;8878580;8878580;8878580;8878580	8861429;8861429;8862945;8862945;8863343;8863343;8864092;8864092;8865482;8865482;8866501;8866501;8866501;8867250;8867250;8867250;8868057;8868057;8868057;8870408;8870510;8871297;8870510;8871986;8871986;8871986;8871986;8874917;8874917;8874917;8874917;8874917;8878267;8879249;8878676;8878688;8878690	3958	15.2862435459834	14.9407496835714	15.6844386767644	15.5122035808379	15.0519387041864	14.9598963782109	14.6855252013566	14.923310196672	15.6537187385402	15.5609404592955	14.4027624962529	14.1534065191894	0.787038511947585	0.887466707391144	0.938193671248458	1.17918084597297	0.937715198253069	0.841271877466752
ENSG00000274258.1	MIR6728	gene_type miRNA	chr1	8866502	8866590	89	3.55782624462725	3.55782624462725	3.55782624462725	3.55782624462725	3.55782624462725	4.09661836972613	3.55782624462725	3.55782624462725	3.55782624462725	3.55782624462725	3.55782624462725	3.55782624462725	1	1	1.45275570996825	1	1	1
ENSG00000236269.1	ENO1-IT1	gene_type sense_intronic	chr1;chr1	8875788;8877508	8876031;8878007	744	3.95230142254003	4.51461706795932	4.36473673247505	4.30835738787737	4.42012488630275	3.9399101021215	4.39158453445309	3.95050242154829	4.45830789965566	4.38328681413529	3.97541602041241	4.15839371305164	1.47663744197739	0.961674557133983	0.716870890439863	0.736581918176769	0.949328246066518	1.13522454884573
ENSG00000230679.1	ENO1-AS1	gene_type antisense	chr1;chr1	8878835;8879565	8878960;8879894	456	4.82873677450076	5.033364466576	4.74983364191774	4.51980079659829	4.7604135404417	4.89148238394061	4.39158453445309	5.064039081779	4.68643555104792	5.10325960928617	4.38456570337338	4.66234229816799	1.15238891811186	0.852615480356801	1.09510472649568	1.59378226357852	1.33498548716731	1.21232507272907
ENSG00000201725.1	RNU6-304P	gene_type snRNA	chr1	8883427	8883533	107	3.55782624462725	3.55782624462725	3.55782624462725	3.55782624462725	3.55782624462725	3.55782624462725	3.97903344337653	3.55782624462725	3.55782624462725	3.97475709050258	3.55782624462725	3.55782624462725	1	1	1	0.746799466090436	1.33508430584895	1
ENSG00000238249.2	HMGN2P17	gene_type processed_pseudogene	chr1	8893409	8894151	743	4.42933801147896	4.11690410408451	4.25885812962813	4.17289735623919	4.30730794355666	4.5518999672019	4.1514250525846	4.50552303053715	4.36577948478197	4.47769828427326	4.27619612797294	4.15839371305164	0.80528205663323	0.942156890627973	1.18475768871075	1.27818616589353	1.0806645763067	0.92159039446638
ENSG00000232208.2	RP3-477M7.5	gene_type processed_pseudogene	chr1	8907393	8907744	352	3.55782624462725	3.55782624462725	3.55782624462725	3.55782624462725	3.55782624462725	3.55782624462725	3.55782624462725	3.55782624462725	3.55782624462725	3.97475709050258	3.55782624462725	3.55782624462725	1	1	1	1	1.33508430584895	1
ENSG00000232663.2	RP3-477M7.6	gene_type processed_pseudogene	chr1	8909742	8909904	163	3.55782624462725	3.55782624462725	3.55782624462725	3.55782624462725	3.55782624462725	3.55782624462725	3.55782624462725	3.55782624462725	3.55782624462725	3.55782624462725	3.55782624462725	3.55782624462725	1	1	1	1	1	1
ENSG00000131686.14	CA6	gene_type protein_coding	chr1;chr1;chr1;chr1;chr1;chr1;chr1;chr1;chr1;chr1;chr1;chr1;chr1;chr1;chr1;chr1;chr1;chr1;chr1;chr1;chr1;chr1;chr1;chr1;chr1;chr1;chr1;chr1;chr1;chr1;chr1;chr1;chr1;chr1;chr1;chr1;chr1;chr1	8945867;8945868;8945882;8945883;8945887;8945887;8949263;8949263;8949263;8949263;8951423;8957137;8957137;8957137;8957142;8958910;8958910;8958910;8958910;8958910;8962587;8962587;8962587;8962587;8962587;8967659;8967659;8967659;8967659;8967659;8970867;8970867;8970867;8970867;8974347;8974622;8974622;8974622	8945965;8945965;8945965;8945965;8945965;8945965;8949442;8949442;8949442;8949351;8952651;8957285;8957285;8957285;8957285;8959002;8959002;8959002;8959002;8959002;8962656;8962656;8962656;8962656;8962656;8967816;8967816;8967816;8967816;8967745;8970981;8970981;8970981;8970981;8974444;8974704;8975092;8974874	2662	3.95230142254003	3.55782624462725	3.55782624462725	3.55782624462725	3.99376167689582	3.9399101021215	3.97903344337653	3.95050242154829	4.25976969624512	3.97475709050258	3.97541602041241	3.55782624462725	0.760766076973291	1	0.963361000009112	0.980418068928156	0.820734437501306	0.748674345507322
ENSG00000265141.2	RN7SL451P	gene_type misc_RNA	chr1	8979576	8979874	299	3.55782624462725	3.55782624462725	3.55782624462725	3.55782624462725	3.55782624462725	3.55782624462725	3.55782624462725	3.55782624462725	3.55782624462725	3.55782624462725	3.55782624462725	3.55782624462725	1	1	1	1	1	1
ENSG00000197241.3	SLC2A7	gene_type protein_coding	chr1;chr1;chr1;chr1;chr1;chr1;chr1;chr1;chr1;chr1;chr1;chr1	9003300;9004752;9007310;9010143;9013525;9014681;9015117;9018223;9019209;9022918;9024976;9026295	9003518;9004879;9007385;9010244;9013635;9014868;9015242;9018375;9019333;9023078;9025074;9026345	1539	3.95230142254003	3.55782624462725	4.13206609265227	3.99438106532615	3.55782624462725	3.55782624462725	3.55782624462725	3.55782624462725	4.13281753800557	3.55782624462725	3.55782624462725	3.55782624462725	0.760766076973291	0.908976544746804	1	1	0.671290302594927	1
ENSG00000142583.17	SLC2A5	gene_type protein_coding	chr1;chr1;chr1;chr1;chr1;chr1;chr1;chr1;chr1;chr1;chr1;chr1;chr1;chr1;chr1;chr1;chr1;chr1;chr1;chr1;chr1;chr1;chr1;chr1;chr1;chr1;chr1;chr1;chr1;chr1;chr1;chr1;chr1;chr1;chr1;chr1;chr1;chr1;chr1;chr1;chr1;chr1;chr1;chr1;chr1;chr1;chr1;chr1;chr1;chr1;chr1;chr1;chr1;chr1;chr1;chr1;chr1;chr1;chr1;chr1;chr1;chr1;chr1	9035107;9037897;9038431;9038431;9038828;9038828;9039552;9039552;9039800;9040064;9040080;9041785;9041785;9041785;9041785;9041785;9041858;9047610;9047610;9047610;9047610;9047610;9047610;9047610;9047611;9057448;9057448;9057448;9057448;9057448;9057448;9057448;9057448;9057498;9058152;9058152;9058152;9058152;9058152;9058152;9058152;9058152;9058152;9069504;9069504;9069504;9069504;9069504;9069504;9069504…	9037789;9038024;9038506;9038506;9038929;9038929;9039895;9039662;9039987;9040189;9041937;9041937;9041937;9041937;9041937;9041937;9041937;9047734;9047734;9047734;9047734;9047734;9047734;9047734;9047734;9057608;9057608;9057608;9057608;9057608;9057608;9057608;9057608;9057608;9058250;9058250;9058250;9058250;9058250;9058250;9058250;9058250;9058250;9069594;9069594;9069594;9069594;9069594;9069594;9069594…	6693	4.11398763489342	3.95438272415751	3.96520609223261	4.30835738787737	3.55782624462725	3.9399101021215	4.39158453445309	4.3361324333863	4.25976969624512	4.38328681413529	3.97541602041241	4.15839371305164	0.895270211592215	1.26852442269663	1.30322289775605	0.962292839657439	1.0893874240924	1.13522454884573
ENSG00000252404.1	SCARNA16	gene_type scaRNA	chr1	9082696	9082879	184	3.55782624462725	3.55782624462725	3.55782624462725	3.55782624462725	3.55782624462725	3.55782624462725	3.55782624462725	3.55782624462725	3.55782624462725	3.55782624462725	3.55782624462725	3.55782624462725	1	1	1	1	1	1
ENSG00000180758.11	GPR157	gene_type protein_coding	chr1;chr1;chr1;chr1;chr1;chr1;chr1;chr1	9100305;9104532;9105486;9111169;9111276;9111276;9128645;9128645	9104634;9104634;9105680;9111489;9111370;9111489;9128781;9129170	5372	7.97992957977304	8.58843349335633	8.53539452691136	8.67958075319772	8.50100286004056	8.85414461522953	8.78387624098079	9.04211331052791	9.28149536512094	8.77875477905065	8.1816103181073	8.42215642445549	1.52467728620133	1.1051071252805	1.27733926082101	1.19601631491975	0.705764815302456	1.1814397896537
ENSG00000228526.6	MIR34AHG	gene_type lincRNA	chr1;chr1;chr1;chr1;chr1;chr1	9148011;9181839;9182007;9182007;9183631;9196912	9151835;9182295;9182392;9182295;9183750;9196983	4571	6.63274011863989	6.53594504470702	6.58248236970284	6.26996910362033	6.70830992601381	6.6477273603788	6.97231504653421	6.88340007783409	7.29693818677796	6.72015865001585	6.38357194184382	6.57894674452427	0.935108014731631	0.805237761499391	0.958876843095374	0.940229617262944	0.670458743090508	1.14502159103829
ENSG00000284357.1	MIR34A	gene_type miRNA	chr1	9151668	9151777	110	3.55782624462725	3.55782624462725	3.55782624462725	3.55782624462725	3.55782624462725	3.55782624462725	3.55782624462725	3.55782624462725	3.55782624462725	3.55782624462725	3.55782624462725	3.55782624462725	1	1	1	1	1	1
ENSG00000234546.3	LINC01759	gene_type lincRNA	chr1;chr1;chr1;chr1;chr1;chr1;chr1;chr1	9182004;9182204;9183633;9183633;9191048;9191393;9191393;9195885	9182316;9182316;9183807;9183807;9191124;9191967;9192089;9196284	1662	5.23195022257982	5.07777357386497	4.86796115633572	4.95589460197784	5.16778017850539	5.06791939041892	5.58367315386047	5.10644675818101	5.39415100968182	5.27782626638846	5.32022328426626	4.66234229816799	0.898645086571959	1.06284664202294	0.933123028288479	0.718357350820788	0.922534811401225	0.633808544358052
ENSG00000281937.1	RP3-510D11.4	gene_type lincRNA	chr1	9197143	9198906	1764	4.2369208620727	4.43382827630526	4.13206609265227	3.99438106532615	3.99376167689582	3.55782624462725	4.1514250525846	4.64593913043284	4.13281753800557	3.97475709050258	3.55782624462725	3.55782624462725	1.14623862285823	0.908976544746804	0.73921429838892	1.40884615390035	0.896229147663079	1
ENSG00000049239.12	H6PD	gene_type protein_coding	chr1;chr1;chr1;chr1;chr1;chr1;chr1;chr1;chr1;chr1;chr1;chr1	9234775;9239844;9244925;9244925;9246966;9246966;9262059;9262059;9263509;9263509;9265530;9271145	9235066;9240018;9245561;9245561;9247083;9247083;9262328;9262328;9271337;9267898;9268037;9271337	9321	9.00589568752474	9.56354639978212	9.17771782698566	9.32794350168574	9.51558320491847	9.60629379265347	9.90166911898251	9.93829662369422	10.1280409420225	9.62922969091029	9.25858043520056	9.01132189634463	1.47187046768555	1.10974305091604	1.0648945584774	1.02571327807055	0.707689661682803	0.842495836104226
ENSG00000171621.13	SPSB1	gene_type protein_coding	chr1;chr1;chr1;chr1;chr1;chr1;chr1;chr1;chr1;chr1	9292880;9294528;9351431;9355707;9355743;9355743;9355743;9367448;9367448;9367448	9293071;9294594;9351610;9356585;9356585;9356585;9356497;9367863;9367575;9369532	3403	8.57406636071148	9.10036449783758	8.75031527500118	8.97906045593988	8.16707964731195	8.49713765162938	8.65582811152229	8.89549489284666	8.7475819792173	9.16733284924827	7.75261433023684	8.11203681128665	1.44022891525808	1.17181529104192	1.25706391442561	1.18071991954276	1.33769653640509	1.28291223776512
ENSG00000252956.1	RNA5SP40	gene_type rRNA	chr1	9437669	9437778	110	3.55782624462725	3.55782624462725	3.55782624462725	3.55782624462725	3.55782624462725	3.55782624462725	3.55782624462725	3.55782624462725	3.55782624462725	3.55782624462725	3.55782624462725	3.55782624462725	1	1	1	1	1	1
ENSG00000235263.1	RP13-392I16.1	gene_type lincRNA	chr1;chr1	9501092;9503221	9501548;9503471	708	3.55782624462725	3.55782624462725	3.55782624462725	3.55782624462725	3.55782624462725	3.55782624462725	3.55782624462725	3.55782624462725	3.55782624462725	3.55782624462725	3.55782624462725	3.55782624462725	1	1	1	1	1	1
ENSG00000171612.6	SLC25A33	gene_type protein_coding	chr1;chr1;chr1;chr1;chr1;chr1;chr1	9539482;9553626;9567284;9570258;9573346;9579954;9582299	9539747;9553805;9567361;9570358;9573412;9580234;9585179	3854	7.65697222202147	8.05839880337417	7.70151679193319	8.43404031548091	7.78208721598579	8.17463517152403	7.17914320523628	7.95255620746376	8.01155805175475	8.1270713502457	7.39903535559931	7.37130813741369	1.32081332620309	1.66154287760179	1.31270974524357	1.70930873783111	1.08336042728916	0.980964465200423
ENSG00000231181.1	RP13-15M17.1	gene_type processed_pseudogene	chr1	9576427	9576985	559	4.33963517379083	4.24046069271801	4.25885812962813	4.42132383357474	4.17203110618318	4.67900310144742	4.1514250525846	4.64593913043284	4.36577948478197	4.38328681413529	4.14636171533227	4.29078246946898	0.933567031497705	1.11919832149129	1.42106445805784	1.40884615390035	1.01220908573275	1.10528678865954
ENSG00000188807.12	TMEM201	gene_type protein_coding	chr1;chr1;chr1;chr1;chr1;chr1;chr1;chr1;chr1;chr1;chr1;chr1;chr1;chr1;chr1;chr1;chr1;chr1;chr1;chr1;chr1;chr1;chr1;chr1;chr1;chr1;chr1;chr1;chr1;chr1;chr1;chr1;chr1	9588922;9588922;9595890;9595890;9596859;9596859;9596897;9598449;9598449;9598449;9601105;9601105;9601105;9602069;9602069;9602069;9606214;9607557;9607557;9607557;9607728;9609840;9609840;9610506;9610506;9610506;9611015;9611753;9611753;9611753;9612986;9612986;9612986	9589043;9589043;9596010;9596010;9597053;9597053;9597053;9598625;9598625;9598625;9601454;9601454;9601454;9602272;9602272;9604954;9606638;9607685;9607789;9607789;9607789;9609911;9609911;9610805;9610805;9610805;9611073;9611890;9611890;9611890;9613247;9614873;9614849	6966	7.6313258936628	9.19380374906361	8.38015027107573	9.16539773346294	8.37939377940571	9.31400596233713	8.30512792624433	9.18827379413698	8.57531773688944	8.88539880349097	8.07914263466079	8.58673820614806	2.95360695524005	1.72338790310495	1.91137676070156	1.84439270910591	1.23977736241851	1.42167881765467
ENSG00000171608.15	PIK3CD	gene_type protein_coding	chr1;chr1;chr1;chr1;chr1;chr1;chr1;chr1;chr1;chr1;chr1;chr1;chr1;chr1;chr1;chr1;chr1;chr1;chr1;chr1;chr1;chr1;chr1;chr1;chr1;chr1;chr1;chr1;chr1;chr1;chr1;chr1;chr1;chr1;chr1;chr1;chr1;chr1;chr1;chr1;chr1;chr1;chr1;chr1;chr1;chr1;chr1;chr1;chr1;chr1;chr1;chr1;chr1;chr1;chr1;chr1;chr1;chr1;chr1;chr1;chr1;chr1;chr1;chr1;chr1;chr1;chr1;chr1;chr1;chr1;chr1;chr1;chr1;chr1;chr1;chr1;chr1;chr1;chr1;chr1…	9651732;9651732;9651745;9688176;9691467;9691467;9691467;9691467;9691675;9710198;9710198;9710424;9710424;9710424;9710424;9710424;9715541;9715541;9715541;9715541;9715541;9715699;9715849;9715849;9715849;9715849;9715849;9715849;9716276;9716440;9716440;9716440;9716440;9716440;9716959;9716959;9717064;9717064;9717064;9717064;9717537;9717537;9717537;9717537;9717537;9717537;9718694;9718694;9718694;9718694…	9651802;9651802;9651802;9688313;9691571;9691571;9691571;9691571;9691946;9710280;9710280;9710596;9710596;9710596;9710596;9710596;9715769;9715769;9715769;9715769;9715769;9715769;9716163;9716078;9716078;9716078;9716078;9716078;9716619;9716619;9716619;9716619;9716619;9716619;9717108;9717108;9717108;9717108;9717108;9717108;9717581;9717626;9717626;9717626;9717626;9717626;9718915;9718915;9718915;9718915…	6332	5.37404480949129	5.59833260155462	5.64635390512537	5.26356097242997	5.46776844823444	5.35529802775334	5.58367315386047	5.68898313261371	6.2244349836912	5.65877545461012	5.19614844504459	4.98112808775494	1.16820040662554	0.766951401028671	0.925002762624706	1.0757254969758	0.675646473628766	0.861534002866334
ENSG00000179840.5	PIK3CD-AS1	gene_type antisense	chr1;chr1	9652610;9654198	9654043;9654586	1823	3.55782624462725	3.55782624462725	3.55782624462725	3.55782624462725	3.55782624462725	3.55782624462725	3.55782624462725	3.55782624462725	3.55782624462725	3.97475709050258	3.55782624462725	3.55782624462725	1	1	1	1	1.33508430584895	1
ENSG00000233268.3	RP11-558F24.2	gene_type processed_pseudogene	chr1;chr1	9660828;9662297	9660918;9662626	421	3.55782624462725	3.55782624462725	3.55782624462725	3.55782624462725	3.55782624462725	3.55782624462725	3.55782624462725	3.55782624462725	3.55782624462725	3.55782624462725	3.55782624462725	3.55782624462725	1	1	1	1	1	1
ENSG00000231789.2	PIK3CD-AS2	gene_type antisense	chr1;chr1;chr1	9672426;9680712;9687335	9672719;9681135;9687555	939	4.65072872024457	3.95438272415751	4.36473673247505	4.42132383357474	4.51847424846376	4.67900310144742	4.72160454055041	4.70873254366796	4.36577948478197	3.97475709050258	4.47911443934651	4.58380936888272	0.617133280960427	1.04000257549042	1.11769678039682	0.991117496262984	0.762588989224572	1.07526699182102
ENSG00000171603.16	CLSTN1	gene_type protein_coding	chr1;chr1;chr1;chr1;chr1;chr1;chr1;chr1;chr1;chr1;chr1;chr1;chr1;chr1;chr1;chr1;chr1;chr1;chr1;chr1;chr1;chr1;chr1;chr1;chr1;chr1;chr1;chr1;chr1;chr1;chr1;chr1;chr1;chr1;chr1;chr1;chr1;chr1;chr1;chr1;chr1;chr1;chr1;chr1;chr1;chr1;chr1;chr1;chr1;chr1;chr1;chr1;chr1;chr1;chr1;chr1;chr1	9729026;9729028;9729028;9729028;9731122;9731206;9731206;9731206;9731761;9731761;9731761;9731761;9733401;9733401;9733401;9733401;9733972;9733972;9733972;9734948;9734948;9734948;9735467;9735467;9735467;9735885;9735885;9735885;9737498;9737498;9741094;9741094;9741094;9743884;9743884;9743884;9744395;9744395;9744395;9749461;9749461;9749461;9749488;9749764;9749764;9749764;9749764;9751473;9751473;9751473…	9730705;9730705;9730705;9730705;9731390;9731390;9731390;9731390;9731896;9731896;9731896;9731896;9733546;9733546;9733486;9733546;9734142;9734142;9734142;9735174;9735174;9735174;9735615;9735615;9735615;9736042;9736042;9736042;9737554;9737554;9741256;9741256;9741256;9744005;9744005;9744005;9744643;9744643;9744643;9749646;9749646;9749646;9749646;9750167;9749913;9749913;9749913;9751681;9751581;9751681…	5559	10.8086374449184	11.547173114363	11.2029280520659	11.3962533084183	11.3187924673931	11.5922925602055	11.6637608479321	11.9344552100111	12.0424436580108	11.7126203812833	10.9583597618326	10.9759566672981	1.66848147609754	1.1433960856042	1.20873676478028	1.20638831679275	0.795633939154665	1.01227193516867
ENSG00000271264.1	MZT1P1	gene_type processed_pseudogene	chr1;chr1	9780822;9781074	9780900;9781240	246	3.55782624462725	3.55782624462725	3.55782624462725	3.55782624462725	3.55782624462725	3.55782624462725	3.55782624462725	3.55782624462725	3.55782624462725	3.55782624462725	3.55782624462725	3.55782624462725	1	1	1	1	1	1
ENSG00000280113.2	RP11-84A14.7	gene_type TEC	chr1;chr1	9826289;9827610	9828271;9828258	1983	3.55782624462725	3.55782624462725	3.55782624462725	3.55782624462725	3.55782624462725	4.09661836972613	3.97903344337653	3.95050242154829	3.55782624462725	4.14543931115403	3.97541602041241	3.55782624462725	1	1	1.45275570996825	0.980418068928156	1.50275838144031	0.748674345507322
ENSG00000178585.14	CTNNBIP1	gene_type protein_coding	chr1;chr1;chr1;chr1;chr1;chr1;chr1;chr1;chr1;chr1;chr1;chr1;chr1;chr1;chr1;chr1;chr1;chr1;chr1;chr1;chr1	9848276;9850109;9850450;9850659;9871187;9871187;9871187;9871187;9871969;9871969;9871969;9871969;9877905;9877905;9877905;9877905;9878140;9883705;9893009;9910095;9910095	9850776;9850776;9850776;9850776;9871277;9871277;9871277;9871277;9872088;9872088;9872088;9872088;9877989;9877989;9877989;9877989;9878176;9883738;9893237;9910336;9910263	3339	9.81739400028326	9.70648586119526	9.70297742982049	9.67534990612518	9.74970181732563	9.81500935162906	9.8645959519174	9.9575326597413	10.0254977000523	9.96142037703383	9.42008613774289	9.32028860453763	0.926004982287846	0.981032255085804	1.04630795386355	1.0665389898937	0.95655688887277	0.933163941910982
ENSG00000223989.1	RP11-84A14.5	gene_type antisense	chr1;chr1;chr1	9848318;9849369;9849986	9848466;9849474;9850154	424	3.55782624462725	3.55782624462725	3.55782624462725	3.55782624462725	3.55782624462725	3.55782624462725	3.55782624462725	3.55782624462725	3.55782624462725	3.55782624462725	3.55782624462725	3.55782624462725	1	1	1	1	1	1
ENSG00000162441.11	LZIC	gene_type protein_coding	chr1;chr1;chr1;chr1;chr1;chr1;chr1;chr1;chr1;chr1;chr1;chr1;chr1;chr1;chr1;chr1;chr1;chr1;chr1;chr1;chr1;chr1;chr1;chr1;chr1;chr1;chr1;chr1;chr1;chr1	9922113;9928939;9929720;9930253;9930261;9931891;9931891;9931891;9931891;9931891;9932803;9932803;9932803;9932803;9934762;9934762;9934762;9934762;9935492;9935492;9935492;9935492;9936519;9936519;9936519;9942624;9942624;9942624;9943249;9943349	9922358;9930457;9930457;9930457;9930457;9932180;9931972;9931972;9931972;9931972;9932898;9932898;9932898;9932898;9934860;9934860;9934860;9934860;9935627;9935627;9935627;9935620;9936627;9936627;9936627;9942782;9942768;9942782;9943329;9943407	2794	8.93972428800624	8.72302237813859	8.89205672494056	8.89918425341195	8.61712462543046	8.82799012209132	8.48299258062587	8.47873170097591	8.7055895161263	8.92122945494526	8.01950777212884	8.21127833436392	0.860530415326353	1.00495265029248	1.15738230850104	0.99705094032863	1.16121888409904	1.142164589241
ENSG00000228150.1	RP11-84A14.4	gene_type sense_intronic	chr1;chr1	9942923;9949638	9943025;9949974	440	4.58305459595839	4.98710777082979	4.86796115633572	5.12005160275531	4.51847424846376	5.02640029324713	4.90976689934899	4.97407035781243	5.07242701478558	5.10325960928617	4.38456570337338	4.73474544680533	1.32322021027597	1.19093150971352	1.42200451413693	1.04558000581632	1.02160153261695	1.27471943300358
ENSG00000173614.13	NMNAT1	gene_type protein_coding	chr1;chr1;chr1;chr1;chr1;chr1;chr1;chr1;chr1;chr1;chr1;chr1;chr1;chr1;chr1;chr1;chr1;chr1;chr1;chr1	9943428;9943428;9943429;9943488;9972018;9972018;9972018;9972018;9975592;9975592;9975592;9981031;9981031;9981031;9981052;9981256;9982301;9982301;9983004;9985136	9943515;9943515;9943515;9943515;9972503;9972188;9972188;9972188;9975775;9975775;9975775;9981170;9981170;9981170;9981170;9981766;9982870;9985498;9983669;9985501	4610	7.23933107483339	7.94740492043877	7.54909636010916	7.65927193356879	7.53389215481644	7.93558209154789	7.65683256075333	8.26865364725712	8.01155805175475	8.46742439081886	6.68201611809004	7.27764216978042	1.63362159842799	1.07935958468283	1.32105445480908	1.52818699337078	1.37160620791384	1.51112819128361
ENSG00000202415.1	RN7SKP269	gene_type misc_RNA	chr1	9947318	9947636	319	4.11398763489342	4.34368653389374	4.13206609265227	3.99438106532615	3.99376167689582	4.09661836972613	3.55782624462725	3.55782624462725	4.13281753800557	4.38328681413529	4.14636171533227	3.9840131269933	1.17259019554756	0.908976544746804	1.07389779287468	1	1.18959400015142	0.893569229371001
ENSG00000283611.1	RP11-84A14.6	gene_type unitary_pseudogene	chr1;chr1;chr1;chr1	9951231;9952339;9955821;9960714	9951297;9952469;9955915;9960832	412	3.55782624462725	3.95438272415751	3.55782624462725	3.99438106532615	3.99376167689582	3.9399101021215	3.97903344337653	3.55782624462725	4.36577948478197	3.97475709050258	3.55782624462725	3.55782624462725	1.3163621772543	1.35336859919879	0.963361000009112	0.746799466090436	0.762588989224572	1
ENSG00000265521.1	MIR5697	gene_type miRNA	chr1	9967381	9967458	78	3.55782624462725	3.55782624462725	3.55782624462725	3.99438106532615	3.55782624462725	3.55782624462725	3.97903344337653	3.55782624462725	3.55782624462725	3.55782624462725	3.55782624462725	3.55782624462725	1	1.35336859919879	1	0.746799466090436	1	1
ENSG00000241326.1	RP11-807G9.2	gene_type sense_intronic	chr1;chr1	9983141;9984283	9983290;9984568	436	3.55782624462725	3.55782624462725	3.55782624462725	3.55782624462725	3.55782624462725	3.55782624462725	3.55782624462725	3.55782624462725	3.55782624462725	3.55782624462725	3.55782624462725	3.55782624462725	1	1	1	1	1	1
ENSG00000162444.11	RBP7	gene_type protein_coding	chr1;chr1;chr1;chr1;chr1;chr1;chr1;chr1;chr1	9997206;9997216;10004093;10007570;10007570;10008173;10008173;10015782;10015782	9997331;9997331;10004307;10007748;10007748;10008274;10008274;10016020;10016020	861	6.20844189988513	6.52172417754814	6.20278407238757	6.98604913057715	5.85795662234265	6.38148337914995	5.87262394184815	6.33356678513243	6.787098824276	7.30708469963758	6.17604816523491	6.33705241198449	1.24253137164843	1.72102142569847	1.4374649279281	1.3764410686457	1.43394120901267	1.11806514212273
ENSG00000130939.18	UBE4B	gene_type protein_coding	chr1;chr1;chr1;chr1;chr1;chr1;chr1;chr1;chr1;chr1;chr1;chr1;chr1;chr1;chr1;chr1;chr1;chr1;chr1;chr1;chr1;chr1;chr1;chr1;chr1;chr1;chr1;chr1;chr1;chr1;chr1;chr1;chr1;chr1;chr1;chr1;chr1;chr1;chr1;chr1;chr1;chr1;chr1;chr1;chr1;chr1;chr1;chr1;chr1;chr1;chr1;chr1;chr1;chr1;chr1;chr1;chr1;chr1;chr1;chr1;chr1;chr1;chr1;chr1;chr1;chr1;chr1;chr1;chr1;chr1;chr1;chr1;chr1;chr1;chr1;chr1;chr1;chr1;chr1;chr1…	10032832;10033274;10033596;10072028;10072028;10072028;10072454;10095461;10095461;10100861;10101108;10101108;10102948;10102948;10102948;10105516;10105516;10106197;10107331;10117459;10117459;10117459;10119513;10119513;10119513;10121962;10121962;10121962;10122042;10126794;10126794;10126794;10126794;10128339;10129392;10129392;10129392;10129392;10130500;10130500;10130500;10130500;10130715;10130715;101…	10033694;10033694;10033694;10072214;10072214;10072214;10073118;10095596;10095596;10101195;10101195;10101195;10103185;10103092;10103092;10105744;10105744;10106583;10107374;10117600;10117600;10117600;10119613;10119613;10119613;10122076;10122076;10122076;10122076;10126877;10126877;10126877;10126877;10129448;10129448;10129448;10129448;10129448;10130616;10130616;10130616;10130616;10130813;10130813;101…	9128	10.1745145451515	10.5947912104271	10.1425112927579	10.5849144725982	10.400625616668	10.6389656260522	10.3953281381395	10.5591423569356	10.5779012733251	10.7548507037649	9.77129058410447	10.0661827937804	1.33818415342968	1.35886598421367	1.17963457170469	1.12024494679889	1.13049094029431	1.22679331450781
ENSG00000224340.1	RP11-496H15.2	gene_type processed_pseudogene	chr1	10054445	10054781	337	3.55782624462725	3.55782624462725	3.55782624462725	3.55782624462725	3.55782624462725	3.55782624462725	3.55782624462725	3.55782624462725	3.96574265195466	3.55782624462725	3.55782624462725	3.55782624462725	1	1	1	1	0.753711125063102	1
ENSG00000233623.2	PGAM1P11	gene_type processed_pseudogene	chr1;chr1	10058671;10059242	10058943;10059648	680	3.55782624462725	3.95438272415751	3.55782624462725	4.17289735623919	3.99376167689582	3.9399101021215	3.55782624462725	3.55782624462725	3.96574265195466	3.55782624462725	3.55782624462725	3.55782624462725	1.3163621772543	1.53163349069426	0.963361000009112	1	0.753711125063102	1
ENSG00000201746.1	RNU6-828P	gene_type snRNA	chr1	10163268	10163374	107	3.95230142254003	3.55782624462725	3.55782624462725	3.99438106532615	3.55782624462725	3.55782624462725	4.28233509801111	3.55782624462725	3.96574265195466	3.55782624462725	3.55782624462725	3.55782624462725	0.760766076973291	1.35336859919879	1	0.60520304298605	0.753711125063102	1
ENSG00000054523.17	KIF1B	gene_type protein_coding	chr1;chr1;chr1;chr1;chr1;chr1;chr1;chr1;chr1;chr1;chr1;chr1;chr1;chr1;chr1;chr1;chr1;chr1;chr1;chr1;chr1;chr1;chr1;chr1;chr1;chr1;chr1;chr1;chr1;chr1;chr1;chr1;chr1;chr1;chr1;chr1;chr1;chr1;chr1;chr1;chr1;chr1;chr1;chr1;chr1;chr1;chr1;chr1;chr1;chr1;chr1;chr1;chr1;chr1;chr1;chr1;chr1;chr1;chr1;chr1;chr1;chr1;chr1;chr1;chr1;chr1;chr1;chr1;chr1;chr1;chr1;chr1;chr1;chr1;chr1;chr1;chr1;chr1;chr1;chr1…	10210805;10210805;10211616;10230764;10232250;10232250;10232250;10232250;10232250;10232329;10232329;10256247;10256247;10256247;10256247;10256247;10256247;10256247;10258493;10258493;10258493;10258493;10258493;10258493;10258493;10261905;10261905;10261905;10261905;10261905;10261905;10261905;10267380;10267380;10267380;10267380;10267380;10267380;10267380;10268152;10268152;10268152;10268152;10268152;102…	10210878;10210878;10211738;10230997;10232434;10232434;10232434;10232434;10232434;10232434;10232434;10256323;10256323;10256323;10256323;10256323;10256323;10256323;10258672;10258672;10258672;10258672;10258672;10258672;10258672;10261970;10261970;10261970;10261970;10261970;10261970;10261970;10267558;10267558;10267558;10267558;10267558;10267558;10267558;10268263;10268263;10268263;10268263;10268263;102…	17720	9.70394900837577	9.86866617982491	9.76229183169007	9.86045315537948	10.1122822528735	9.94960687514075	9.97307350912593	9.72137687528171	9.9624740803811	9.55707234562046	9.28869779024893	9.43696087194466	1.12094630414147	1.07040838593556	0.893366847114821	0.839908088061773	0.755026017966986	1.10823442079148
ENSG00000264881.1	MIR1273D	gene_type miRNA	chr1	10227718	10227803	86	3.55782624462725	3.55782624462725	3.55782624462725	3.55782624462725	3.55782624462725	3.55782624462725	3.55782624462725	3.55782624462725	3.55782624462725	3.55782624462725	3.55782624462725	3.55782624462725	1	1	1	1	1	1
ENSG00000199562.1	RNU6-37P	gene_type snRNA	chr1	10298966	10299072	107	3.55782624462725	3.55782624462725	3.55782624462725	3.55782624462725	3.55782624462725	3.55782624462725	3.55782624462725	3.55782624462725	3.96574265195466	3.97475709050258	3.55782624462725	3.55782624462725	1	1	1	1	1.0062678942155	1
ENSG00000264501.2	RN7SL731P	gene_type misc_RNA	chr1	10306465	10306757	293	3.55782624462725	3.55782624462725	3.55782624462725	3.55782624462725	3.55782624462725	3.55782624462725	3.55782624462725	3.55782624462725	3.55782624462725	3.55782624462725	3.55782624462725	3.55782624462725	1	1	1	1	1	1
ENSG00000142657.20	PGD	gene_type protein_coding	chr1;chr1;chr1;chr1;chr1;chr1;chr1;chr1;chr1;chr1;chr1;chr1;chr1;chr1;chr1;chr1;chr1;chr1;chr1;chr1;chr1;chr1;chr1;chr1;chr1;chr1;chr1;chr1;chr1;chr1;chr1;chr1;chr1;chr1;chr1;chr1;chr1;chr1;chr1;chr1;chr1;chr1;chr1;chr1;chr1;chr1;chr1;chr1;chr1;chr1;chr1;chr1;chr1;chr1	10398592;10399044;10399073;10399080;10399112;10399498;10399629;10399629;10399629;10399629;10399629;10399632;10400376;10400393;10400393;10400393;10400393;10403071;10403071;10403071;10403071;10404161;10404161;10404161;10404161;10404161;10408071;10408071;10408071;10408071;10411418;10411418;10411418;10411418;10412834;10413062;10413062;10413062;10415292;10416987;10416987;10416987;10416987;10417376;104…	10398751;10399125;10399125;10399125;10399125;10399704;10399704;10399704;10399704;10400008;10399704;10399704;10400572;10400572;10400572;10400572;10400572;10403136;10403136;10403136;10403136;10404279;10404279;10404279;10404276;10404279;10408140;10408140;10408140;10408140;10411552;10411552;10411552;10411552;10413251;10413251;10413251;10413251;10415392;10417044;10417117;10417117;10417117;10417509;104…	2966	12.482062070747	12.3533762505916	12.522135817733	12.4895386504036	12.6161578370603	12.601335244827	12.1422061008606	12.4090938160728	12.6427969137893	12.4831300482151	11.9105331687227	11.7257240463032	0.914664256875934	0.977658712446241	0.989778361673624	1.20320937670888	0.895231766093619	0.87976546669842
ENSG00000271989.1	RP4-736L20.3	gene_type antisense	chr1	10429881	10430677	797	3.95230142254003	3.95438272415751	4.13206609265227	4.17289735623919	3.55782624462725	4.09661836972613	4.1514250525846	3.95050242154829	4.25976969624512	3.55782624462725	4.14636171533227	3.55782624462725	1.00144368946577	1.0287063842134	1.45275570996825	0.869994007565042	0.614743528858591	0.665017646772281
ENSG00000251503.8	APITD1-CORT	gene_type protein_coding	chr1;chr1;chr1;chr1;chr1;chr1;chr1;chr1;chr1;chr1;chr1;chr1;chr1;chr1;chr1;chr1;chr1;chr1;chr1;chr1;chr1;chr1	10430102;10430384;10430435;10430804;10431258;10433842;10433842;10433842;10434657;10434657;10434657;10434657;10440347;10440347;10440347;10440347;10442265;10451377;10451377;10451377;10451377;10451377	10430568;10430568;10430568;10431401;10431401;10433965;10433965;10433965;10434690;10434690;10434690;10434690;10440413;10440413;10440413;10440413;10442441;10451659;10451411;10452003;10451659;10452153	2244	4.33963517379083	3.95438272415751	3.96520609223261	3.99438106532615	4.17203110618318	4.09661836972613	4.1514250525846	4.3361324333863	4.36577948478197	4.27507766239493	3.97541602041241	4.15839371305164	0.765645010622637	1.02042841145107	0.949070565251434	1.13658641810945	0.9390658142948	1.13522454884573
ENSG00000175279.21	CENPS	gene_type protein_coding	chr1;chr1;chr1;chr1;chr1;chr1;chr1;chr1;chr1;chr1;chr1;chr1;chr1;chr1;chr1;chr1;chr1	10430443;10430512;10430783;10430876;10431123;10433842;10433842;10434657;10434657;10440123;10440347;10440347;10440347;10442265;10442265;10442265;10442265	10430568;10430568;10431401;10431130;10431401;10433965;10433965;10434690;10434690;10440413;10440413;10440413;10440413;10442502;10442657;10442334;10442809	1739	6.6196145424341	6.27186328165926	6.58248236970284	6.48167753165901	6.38632259483819	6.39607621747879	6.01986062690363	5.94684447135622	6.18640951813256	6.60584322284009	6.48488459557877	6.06678205773616	0.785807988417029	0.932512624445092	1.00678360112803	0.950648455645168	1.33740248651257	0.748408299271881
ENSG00000241563.3	CORT	gene_type protein_coding	chr1;chr1	10449719;10451377	10450322;10451902	1130	4.2369208620727	3.95438272415751	3.96520609223261	4.17289735623919	4.30730794355666	4.31549205937346	3.97903344337653	4.23386063257747	4.36577948478197	3.97475709050258	3.97541602041241	3.9840131269933	0.822143344825728	1.15483862323957	1.00568891758447	1.19319280987744	0.762588989224572	1.00597685070739
ENSG00000160049.11	DFFA	gene_type protein_coding	chr1;chr1;chr1;chr1;chr1;chr1;chr1;chr1;chr1;chr1;chr1;chr1;chr1;chr1;chr1;chr1	10456522;10461643;10462468;10462988;10463058;10463431;10463431;10467190;10467190;10467190;10469177;10469177;10469177;10472323;10472323;10472323	10461702;10461702;10463209;10463209;10463209;10463620;10463620;10467332;10467332;10467332;10469338;10469338;10469338;10472488;10472526;10472479	6622	9.10675795287397	9.84918826581515	9.33385241333716	9.58637071641954	9.40461596167752	9.82957574026418	9.27801223410397	9.83529843659473	10.0630540226837	10.0463086075381	8.88976444207041	9.1933364698479	1.67299172899743	1.19128475383796	1.34253507324089	1.47149863346278	0.988460064493311	1.23419643100237
ENSG00000203469.2	RP5-1113E3.3	gene_type antisense	chr1;chr1	10458555;10459090	10458772;10459338	467	3.55782624462725	3.55782624462725	3.55782624462725	3.55782624462725	3.55782624462725	3.55782624462725	3.55782624462725	3.55782624462725	3.55782624462725	3.55782624462725	3.55782624462725	3.55782624462725	1	1	1	1	1	1
ENSG00000142655.12	PEX14	gene_type protein_coding	chr1;chr1;chr1;chr1;chr1;chr1;chr1;chr1;chr1;chr1;chr1;chr1;chr1;chr1;chr1;chr1;chr1;chr1;chr1;chr1;chr1	10472288;10474887;10474982;10495274;10495274;10495274;10517028;10535888;10536213;10536213;10536213;10536213;10599238;10599238;10618332;10618332;10623019;10623019;10624340;10627272;10629531	10472580;10475002;10475002;10495321;10495321;10495321;10517131;10536060;10536289;10536297;10536572;10536297;10599366;10599366;10618417;10618417;10623286;10623121;10624437;10627363;10630758	2995	8.39179568618682	8.71381501547918	8.61065529247521	8.66805607995754	8.73929394300353	8.70403741717098	8.49922402105946	8.88748976203684	9.04560933118261	8.85484390089794	8.48779579928321	8.10661888155338	1.25007905108777	1.0405893069859	0.975858227843459	1.30881913060784	0.876140756383782	0.767810972398378
ENSG00000243267.3	RN7SL614P	gene_type misc_RNA	chr1	10616836	10617115	280	3.55782624462725	3.55782624462725	3.55782624462725	3.55782624462725	3.55782624462725	3.55782624462725	3.55782624462725	3.55782624462725	3.55782624462725	3.55782624462725	3.55782624462725	3.55782624462725	1	1	1	1	1	1
ENSG00000130940.14	CASZ1	gene_type protein_coding	chr1;chr1;chr1;chr1;chr1;chr1;chr1;chr1;chr1;chr1;chr1;chr1;chr1;chr1;chr1;chr1;chr1;chr1;chr1;chr1;chr1;chr1;chr1;chr1;chr1;chr1;chr1;chr1;chr1;chr1;chr1;chr1;chr1;chr1;chr1;chr1;chr1;chr1;chr1;chr1;chr1;chr1;chr1;chr1;chr1;chr1;chr1;chr1;chr1;chr1;chr1;chr1;chr1;chr1;chr1;chr1;chr1;chr1;chr1;chr1;chr1	10636604;10637121;10638715;10642082;10642859;10642859;10643160;10643160;10644917;10644917;10646128;10647213;10647801;10649070;10649070;10649283;10649283;10650484;10650692;10650692;10650941;10650941;10650941;10652984;10653377;10653377;10654419;10654419;10654419;10655649;10655649;10655649;10656646;10656646;10656646;10658007;10658508;10658508;10658508;10659702;10659702;10659702;10659702;10660737;106…	10640059;10637408;10638763;10642322;10643000;10643000;10643311;10643311;10645076;10645088;10646326;10648139;10648139;10649192;10649192;10649437;10649437;10650755;10650755;10650755;10651100;10651076;10651076;10654218;10654218;10654218;10654591;10654591;10654591;10655813;10655813;10655813;10656736;10656736;10656736;10658576;10658576;10658576;10658576;10661398;10660536;10660536;10660536;10660856;106…	11336	7.62484192858743	8.87116352831534	8.21072802336158	9.04289595457176	8.58896025835813	8.85155042765164	8.7970613340551	8.64944839174558	8.92413791899509	8.59866041857066	8.06312246151728	7.91530046950285	2.37235777625803	1.78035869005599	1.199630551317	0.902742890012843	0.798034210815697	0.902612090046642
ENSG00000272078.1	RP4-734G22.3	gene_type antisense	chr1;chr1	10639241;10647248	10640077;10654333	7923	4.42933801147896	4.71959819811634	4.74983364191774	4.6881228546508	4.68658471014338	4.5518999672019	4.78830407589882	4.42545549391194	4.25976969624512	4.7764253630922	3.55782624462725	4.80211492462791	1.22286079785808	0.958127271862555	0.910868854490443	0.77762764748525	1.43063502452561	2.36901721124661
ENSG00000225158.2	HSPE1P24	gene_type processed_pseudogene	chr1	10895761	10895998	238	3.55782624462725	3.55782624462725	3.55782624462725	3.55782624462725	3.55782624462725	3.55782624462725	3.55782624462725	3.55782624462725	3.55782624462725	3.97475709050258	3.55782624462725	3.55782624462725	1	1	1	1	1.33508430584895	1
ENSG00000175262.14	C1orf127	gene_type protein_coding	chr1;chr1;chr1;chr1;chr1;chr1;chr1;chr1;chr1;chr1;chr1;chr1;chr1;chr1;chr1;chr1;chr1;chr1;chr1;chr1;chr1;chr1;chr1;chr1;chr1;chr1;chr1;chr1;chr1;chr1;chr1;chr1;chr1;chr1;chr1;chr1;chr1	10946471;10946473;10946473;10946475;10946730;10947643;10947643;10947643;10947643;10947643;10949624;10949624;10949702;10954019;10954019;10954019;10954990;10954990;10954990;10957023;10957023;10957585;10957616;10957616;10958714;10958714;10958714;10964128;10964128;10964128;10966358;10966358;10969970;10969970;10976156;10976156;10982012	10946738;10946741;10946741;10946586;10946741;10948844;10948844;10947870;10948844;10949751;10949814;10949814;10949814;10954142;10954142;10954142;10955186;10955186;10955186;10957107;10957107;10957753;10957753;10957753;10958752;10958752;10958752;10964271;10964271;10964201;10966482;10966482;10970089;10970089;10976215;10976256;10982037	3573	3.95230142254003	4.11690410408451	4.53994339918289	5.06796559516205	3.99376167689582	4.21583248886372	4.90976689934899	5.01996886426648	4.13281753800557	4.38328681413529	3.97541602041241	4.15839371305164	1.12085735121679	1.44195105582247	1.16640661925475	1.07937932976598	1.18959400015142	1.13522454884573
ENSG00000215785.2	CFL1P6	gene_type processed_pseudogene	chr1;chr1	10990978;10991418	10991091;10991797	494	3.55782624462725	3.55782624462725	3.55782624462725	3.55782624462725	3.99376167689582	3.55782624462725	3.55782624462725	3.55782624462725	3.55782624462725	3.97475709050258	3.55782624462725	3.55782624462725	1	1	0.73921429838892	1	1.33508430584895	1
ENSG00000120948.16	TARDBP	gene_type protein_coding	chr1;chr1;chr1;chr1;chr1;chr1;chr1;chr1;chr1;chr1;chr1;chr1;chr1;chr1;chr1;chr1;chr1;chr1;chr1;chr1;chr1;chr1;chr1;chr1;chr1;chr1;chr1;chr1;chr1;chr1;chr1;chr1;chr1;chr1;chr1;chr1;chr1;chr1;chr1;chr1;chr1;chr1;chr1;chr1;chr1;chr1;chr1;chr1;chr1;chr1;chr1;chr1;chr1;chr1;chr1;chr1;chr1;chr1;chr1;chr1;chr1;chr1;chr1;chr1;chr1;chr1;chr1;chr1;chr1;chr1;chr1;chr1;chr1;chr1;chr1;chr1;chr1;chr1;chr1;chr1…	11012344;11012400;11012424;11012425;11012622;11012653;11012654;11012654;11012654;11012670;11013716;11013716;11013716;11013716;11013716;11013716;11013716;11013716;11013716;11013716;11013716;11013716;11013728;11013728;11013728;11015524;11016123;11016844;11016844;11016844;11016844;11016844;11016844;11016844;11016844;11016844;11016844;11016844;11016844;11016844;11016844;11016859;11016865;11016878;110…	11012428;11012743;11012480;11012606;11012743;11012743;11012743;11012743;11012743;11012743;11013965;11013965;11013965;11013965;11013965;11013965;11013965;11013965;11013965;11013965;11013965;11013965;11013965;11013965;11013965;11015646;11016254;11017007;11017007;11016861;11017007;11017007;11017007;11017007;11017007;11017007;11017007;11017007;11017007;11017007;11017007;11017007;11017007;11017007;110…	6071	10.5696874060768	10.4728323103877	10.548868751193	10.597110533743	10.5818697237814	10.4818689741023	10.4253385746035	10.2104387260288	10.2984269531739	10.4543868919436	10.4476518088312	10.5993567366032	0.935069111390173	1.03400401138337	0.933032506697592	0.861605970045028	1.11416271195324	1.11088149851081
ENSG00000277726.4	RP4-635E18.9	gene_type protein_coding	chr1;chr1;chr1;chr1;chr1;chr1;chr1;chr1;chr1;chr1;chr1;chr1;chr1;chr1;chr1;chr1;chr1;chr1;chr1;chr1;chr1;chr1;chr1;chr1	11012662;11013716;11016844;11018733;11020429;11020506;11022124;11022124;11022144;11023193;11023193;11023198;11024064;11024793;11025110;11025110;11025110;11025110;11029687;11030179;11030179;11030179;11030179;11030179	11012743;11013965;11017007;11018873;11020599;11020599;11022241;11022250;11022250;11023329;11023329;11023329;11024335;11025208;11025208;11025208;11025208;11025208;11029781;11030525;11030497;11030526;11030430;11030528	2205	3.95230142254003	3.55782624462725	4.13206609265227	3.55782624462725	3.55782624462725	3.55782624462725	3.55782624462725	3.55782624462725	3.55782624462725	3.55782624462725	3.55782624462725	3.55782624462725	0.760766076973291	0.67164004343305	1	1	1	1
ENSG00000009724.16	MASP2	gene_type protein_coding	chr1;chr1;chr1;chr1;chr1;chr1;chr1;chr1;chr1;chr1;chr1;chr1;chr1;chr1;chr1;chr1;chr1;chr1;chr1;chr1;chr1	11026523;11030176;11030748;11034828;11037693;11037693;11042875;11042875;11043339;11044798;11044798;11045408;11045408;11046556;11046556;11046891;11046891;11046891;11047203;11047203;11047203	11027648;11030250;11030882;11034906;11037811;11037811;11043022;11043198;11043535;11044953;11046733;11045539;11045539;11046733;11046733;11047119;11047119;11047119;11047227;11047233;11047223	4251	4.50974017200837	4.65626681633109	4.36473673247505	4.51980079659829	5.01143118136676	4.84241664863886	4.96559827584987	4.50552303053715	4.36577948478197	4.56224313213017	4.64091134249155	4.29078246946898	1.10690134486191	1.11347106177809	0.889450033778516	0.726948342898112	1.14588609893268	0.784514015720427
ENSG00000271895.2	RP4-635E18.8	gene_type antisense	chr1;chr1;chr1	11029659;11029758;11029902	11030528;11029781;11030528	870	4.42933801147896	4.43382827630526	4.25885812962813	4.17289735623919	4.7604135404417	4.40257149830365	5.06935440212042	4.57853741794673	4.75132975326967	4.38328681413529	4.56377988186717	4.86525230716655	1.003117262995	0.942156890627973	0.78033091240406	0.711621999055209	0.774832869156871	1.23240156992142
ENSG00000116649.9	SRM	gene_type protein_coding	chr1;chr1;chr1;chr1;chr1;chr1;chr1;chr1;chr1;chr1;chr1;chr1;chr1;chr1;chr1;chr1;chr1;chr1;chr1;chr1;chr1;chr1;chr1	11054584;11054589;11054664;11054962;11054962;11055781;11055781;11056011;11056011;11056011;11056604;11056604;11056604;11056702;11058710;11058800;11058800;11058800;11059225;11059225;11059225;11059777;11059777	11054885;11054885;11055084;11055084;11055204;11055820;11055926;11056094;11056094;11056094;11056757;11056757;11056757;11056757;11058873;11058892;11058892;11058892;11059686;11059380;11059345;11060020;11060024	1898	9.56739414233102	10.6909197020603	10.3687465450122	10.7740441991718	10.1906182183995	10.834131322268	9.92736438454225	10.7740038687446	10.6922310921258	10.6758194024704	9.85262261507091	10.2130896600568	2.17878759718581	1.32436212214189	1.56212846757139	1.79830718824488	0.988688742395789	1.28384144946312
ENSG00000171824.13	EXOSC10	gene_type protein_coding	chr1;chr1;chr1;chr1;chr1;chr1;chr1;chr1;chr1;chr1;chr1;chr1;chr1;chr1;chr1;chr1;chr1;chr1;chr1;chr1;chr1;chr1;chr1;chr1;chr1;chr1;chr1;chr1;chr1;chr1;chr1;chr1;chr1;chr1;chr1;chr1;chr1;chr1;chr1;chr1;chr1;chr1;chr1;chr1;chr1;chr1;chr1;chr1;chr1;chr1;chr1;chr1;chr1;chr1;chr1;chr1;chr1;chr1;chr1;chr1;chr1;chr1;chr1;chr1;chr1;chr1;chr1;chr1;chr1;chr1;chr1;chr1;chr1;chr1;chr1;chr1;chr1;chr1;chr1;chr1…	11066618;11066618;11066621;11066685;11068008;11068008;11068008;11068008;11068645;11068645;11068645;11068645;11068645;11068654;11069559;11069559;11069559;11069559;11069559;11070900;11070900;11070900;11070900;11070900;11072087;11072087;11072087;11072087;11073934;11073934;11074231;11074231;11074231;11074288;11076842;11076842;11076842;11076842;11077009;11077330;11077365;11077365;11077601;11077601;110…	11066748;11066748;11066748;11066748;11068084;11068084;11068084;11068084;11068706;11068706;11068924;11068706;11068706;11068706;11069730;11069730;11069730;11069730;11069730;11070973;11073026;11070988;11070973;11070973;11072395;11072171;11072171;11072171;11074008;11074008;11074326;11074326;11074326;11074326;11076948;11077651;11076948;11076948;11077443;11077443;11077443;11077443;11077651;11077651;110…	6003	9.80601438678945	9.74764582502996	9.90142285412018	9.86382235640925	9.96833756886167	9.81500935162906	9.56285609009858	9.63160925261319	9.75339222622778	9.61289558646475	9.15170704936313	9.17277360408405	0.960349494485672	0.974274021196943	0.8991737242921	1.04880986640611	0.90720680064958	1.01470935629353
ENSG00000226849.1	RP4-635E18.7	gene_type antisense	chr1;chr1	11068471;11070659	11068713;11073097	2682	3.95230142254003	4.11690410408451	3.96520609223261	3.55782624462725	3.55782624462725	3.9399101021215	3.55782624462725	4.11146652358321	3.96574265195466	3.97475709050258	3.55782624462725	3.55782624462725	1.12085735121679	0.753991493562934	1.30322289775605	1.4677846135353	1.0062678942155	1
ENSG00000230337.1	RP4-635E18.6	gene_type antisense	chr1;chr1;chr1;chr1	11099675;11099675;11101801;11101801	11099814;11099910;11102051;11102100	536	4.77292150848265	4.77901403647871	4.68501284740425	4.6881228546508	4.89341836085845	4.21583248886372	4.4868859099821	4.42545549391194	4.45830789965566	4.63926676564394	3.55782624462725	3.55782624462725	1.00423194811142	1.00215801793058	0.62521059327499	0.958313490977932	1.1336370901428	1
ENSG00000198793.12	MTOR	gene_type protein_coding	chr1;chr1;chr1;chr1;chr1;chr1;chr1;chr1;chr1;chr1;chr1;chr1;chr1;chr1;chr1;chr1;chr1;chr1;chr1;chr1;chr1;chr1;chr1;chr1;chr1;chr1;chr1;chr1;chr1;chr1;chr1;chr1;chr1;chr1;chr1;chr1;chr1;chr1;chr1;chr1;chr1;chr1;chr1;chr1;chr1;chr1;chr1;chr1;chr1;chr1;chr1;chr1;chr1;chr1;chr1;chr1;chr1;chr1;chr1;chr1;chr1;chr1;chr1;chr1;chr1;chr1;chr1;chr1;chr1;chr1;chr1;chr1;chr1;chr1;chr1;chr1;chr1;chr1;chr1;chr1…	11106535;11106535;11107285;11107307;11108181;11108181;11108181;11108181;11109290;11109290;11109290;11109290;11109303;11109649;11109649;11109649;11109649;11109649;11111514;11112852;11112852;11112852;11112852;11112852;11114318;11114318;11114318;11114318;11114318;11114813;11114813;11114813;11114813;11115396;11115396;11115396;11115396;11117004;11117004;11121246;11121246;11121979;11121979;11124498;111…	11107500;11107500;11107500;11107500;11108286;11108286;11108286;11108286;11109370;11109370;11109370;11109370;11109370;11109729;11109729;11109729;11109729;11109729;11111753;11112917;11112917;11112917;11112917;11112917;11114453;11114453;11114629;11114453;11114453;11114887;11114887;11114887;11114887;11115663;11115527;11115468;11115468;11117086;11117086;11121368;11121368;11122126;11122126;11124633;111…	12119	10.5390878535518	10.7446112582552	10.7340141985941	10.9586614611554	10.9387422509859	10.9361524809892	10.6443764740317	10.774726969726	10.7513337638754	10.5679365051	10.2686515875216	10.3748070054098	1.15310461323291	1.16849151866994	0.998206518442059	1.09455958685245	0.880626852384806	1.07635607165592
ENSG00000225602.5	MTOR-AS1	gene_type antisense	chr1;chr1;chr1;chr1;chr1;chr1;chr1;chr1	11143898;11144424;11144667;11144667;11145153;11145153;11149270;11149270	11143987;11144481;11144886;11144886;11145279;11145279;11149537;11149537	763	3.55782624462725	3.55782624462725	3.96520609223261	3.55782624462725	3.55782624462725	3.55782624462725	3.55782624462725	3.55782624462725	3.55782624462725	3.55782624462725	3.55782624462725	3.9840131269933	1	0.753991493562934	1	1	1	1.34367747037693
ENSG00000253086.1	RNU6-537P	gene_type snRNA	chr1	11152350	11152452	103	3.55782624462725	3.55782624462725	3.55782624462725	3.55782624462725	3.55782624462725	3.55782624462725	3.55782624462725	3.55782624462725	3.55782624462725	3.55782624462725	3.55782624462725	3.55782624462725	1	1	1	1	1	1
ENSG00000171819.4	ANGPTL7	gene_type protein_coding	chr1;chr1;chr1;chr1;chr1;chr1;chr1;chr1	11189341;11192270;11193580;11193627;11194461;11194526;11194854;11194854	11189955;11192370;11193774;11193774;11194659;11194659;11195981;11195178	2238	3.55782624462725	3.55782624462725	3.55782624462725	3.55782624462725	3.55782624462725	3.9399101021215	3.55782624462725	3.55782624462725	3.55782624462725	3.97475709050258	3.97541602041241	3.55782624462725	1	1	1.30322289775605	1	1.33508430584895	0.748674345507322
ENSG00000207451.1	RNU6-291P	gene_type snRNA	chr1	11226254	11226360	107	3.55782624462725	3.55782624462725	3.55782624462725	3.55782624462725	3.55782624462725	3.55782624462725	3.55782624462725	3.55782624462725	3.55782624462725	3.55782624462725	3.55782624462725	3.55782624462725	1	1	1	1	1	1
ENSG00000238173.1	RPL39P6	gene_type processed_pseudogene	chr1	11232963	11233112	150	3.55782624462725	3.55782624462725	3.55782624462725	3.99438106532615	3.55782624462725	3.55782624462725	3.55782624462725	3.55782624462725	3.55782624462725	3.97475709050258	3.55782624462725	3.55782624462725	1	1.35336859919879	1	1	1.33508430584895	1
ENSG00000120942.13	UBIAD1	gene_type protein_coding	chr1;chr1;chr1;chr1;chr1;chr1;chr1;chr1;chr1;chr1;chr1;chr1	11273206;11273528;11273889;11273934;11285644;11285644;11285644;11292049;11293467;11294873;11294873;11294873	11274060;11274060;11274060;11274060;11285732;11288434;11285732;11292147;11293626;11296049;11295183;11295164	5082	8.90812772167152	9.22437132380552	8.94285015641989	9.48060538348761	8.94687665052648	9.45393104963486	8.41189115625938	9.39057097332016	8.80071067026559	9.36886109701579	8.49178744410941	8.76222687075276	1.24508445279866	1.45171195623319	1.42114562872465	1.97066126879895	1.48262159155064	1.20617515742738
ENSG00000238199.1	UBE2V2P3	gene_type processed_pseudogene	chr1;chr1	11278616;11279168	11278868;11279351	437	4.11398763489342	3.55782624462725	3.55782624462725	3.99438106532615	3.55782624462725	3.9399101021215	3.55782624462725	3.55782624462725	3.96574265195466	3.97475709050258	3.97541602041241	3.55782624462725	0.680109340014304	1.35336859919879	1.30322289775605	1	1.0062678942155	0.748674345507322
ENSG00000224338.2	MTCYBP45	gene_type processed_pseudogene	chr1	11425257	11425821	565	3.55782624462725	3.55782624462725	3.55782624462725	3.55782624462725	3.55782624462725	3.55782624462725	3.55782624462725	3.55782624462725	3.55782624462725	3.55782624462725	3.55782624462725	3.55782624462725	1	1	1	1	1	1
ENSG00000204624.7	DISP3	gene_type protein_coding	chr1;chr1;chr1;chr1;chr1;chr1;chr1;chr1;chr1;chr1;chr1;chr1;chr1;chr1;chr1;chr1;chr1;chr1;chr1;chr1;chr1;chr1;chr1;chr1;chr1;chr1;chr1;chr1	11479166;11479238;11481258;11500990;11502678;11514390;11515369;11516001;11517463;11519355;11519719;11520687;11523942;11525176;11526651;11529556;11529787;11530907;11531565;11533676;11534381;11534381;11535011;11535011;11535478;11535478;11536324;11536324	11479372;11479372;11481960;11502088;11502897;11514526;11515503;11516161;11517602;11519503;11519880;11520848;11524055;11525312;11526835;11529686;11529959;11531033;11531710;11533827;11534540;11534540;11535124;11535124;11535644;11535644;11537225;11537584	6142	5.37404480949129	6.20164182991011	5.67485767635021	5.88853062366264	5.80051129351762	5.85066251296999	6.1526059166864	6.04937501477824	6.26143551126419	6.27089121186422	5.50247331226852	5.39193585366495	1.77472688120245	1.15963674010321	1.0353734432411	0.930945810953918	1.00657571793111	0.926242936995097
ENSG00000235643.1	LINC01647	gene_type lincRNA	chr1;chr1;chr1	11609531;11611843;11612790	11610113;11611978;11613355	1285	3.55782624462725	3.55782624462725	3.96520609223261	3.55782624462725	4.17203110618318	4.21583248886372	3.55782624462725	3.95050242154829	3.55782624462725	4.14543931115403	3.55782624462725	3.55782624462725	1	0.753991493562934	1.03082639408898	1.31282641920024	1.50275838144031	1
ENSG00000116661.9	FBXO2	gene_type protein_coding	chr1;chr1;chr1;chr1;chr1;chr1;chr1;chr1;chr1;chr1;chr1;chr1;chr1;chr1;chr1;chr1;chr1	11648367;11649087;11649528;11649779;11649874;11649945;11649945;11650466;11650466;11650466;11650547;11650737;11653391;11653391;11654031;11654319;11655640	11648828;11649225;11649874;11649874;11650074;11650074;11650074;11650834;11650713;11650834;11650834;11650834;11653529;11653427;11654197;11654682;11655785	2333	7.14249377635154	6.91763689183757	7.28488036702722	7.22644883022081	6.82450225258002	6.8187213437093	8.05894512350332	8.15754502502717	8.5054781656488	8.2307599639451	5.74847589071722	5.84214700233732	0.855679905000928	0.960307575207641	0.99600099671037	1.07073383846924	0.826611762556297	1.06708204969251
ENSG00000132879.13	FBXO44	gene_type protein_coding	chr1;chr1;chr1;chr1;chr1;chr1;chr1;chr1;chr1;chr1;chr1;chr1;chr1;chr1;chr1;chr1;chr1;chr1;chr1;chr1;chr1;chr1;chr1;chr1;chr1;chr1;chr1;chr1;chr1;chr1;chr1;chr1;chr1;chr1;chr1;chr1;chr1;chr1;chr1;chr1;chr1;chr1;chr1;chr1;chr1;chr1;chr1;chr1;chr1;chr1;chr1	11654375;11654857;11654857;11654881;11654901;11654910;11654910;11655328;11655328;11655670;11655806;11655806;11655806;11655806;11655806;11655806;11655806;11656065;11658267;11658267;11658267;11658267;11658267;11658267;11658267;11658267;11658533;11658533;11658533;11658542;11658736;11658736;11658736;11658736;11658736;11658736;11658736;11658736;11658736;11661130;11661130;11661130;11661130;11661130;116…	11654581;11654952;11654952;11654952;11654952;11654952;11654952;11655699;11655699;11655699;11656100;11656100;11656100;11656100;11656100;11656100;11656100;11656100;11658364;11658364;11658364;11658393;11658364;11658393;11658364;11658364;11658628;11658628;11658628;11658628;11658871;11658871;11658871;11658871;11658871;11658871;11658871;11658868;11658871;11661308;11662291;11661308;11661349;11663326;116…	3527	7.59197437736752	7.63188692540129	7.72109969543818	7.56271846002989	7.52539835367634	7.56214383883038	7.92101228591623	8.24376446974928	8.1578316513779	8.01531843634776	7.4575588938361	7.44205451974604	1.02805150728288	0.89602989036895	1.02579716208699	1.25071422262943	0.905939607825024	0.989310727499163
ENSG00000116663.10	FBXO6	gene_type protein_coding	chr1;chr1;chr1;chr1;chr1;chr1;chr1;chr1;chr1;chr1;chr1;chr1;chr1;chr1	11664124;11664486;11668656;11668656;11668696;11671266;11671266;11671266;11671928;11671928;11673277;11673277;11673615;11673615	11664255;11664735;11668944;11668944;11668944;11671392;11671392;11671392;11672064;11672023;11673412;11673412;11674030;11674354	1811	7.23933107483339	6.9705707265203	7.3784872654323	7.43207836836886	7.24382684510471	7.07346247834924	7.10639831270702	7.21946078384926	7.56701835318015	7.60860470840178	6.40097877738955	6.23930018956412	0.830032454059417	1.03784507673439	0.888618223592018	1.0815215941891	1.02924493939991	0.893984307309189
ENSG00000116670.14	MAD2L2	gene_type protein_coding	chr1;chr1;chr1;chr1;chr1;chr1;chr1;chr1;chr1;chr1;chr1;chr1;chr1;chr1;chr1;chr1;chr1;chr1;chr1;chr1;chr1;chr1;chr1;chr1;chr1;chr1;chr1;chr1;chr1;chr1;chr1;chr1;chr1;chr1;chr1;chr1;chr1;chr1;chr1;chr1;chr1;chr1;chr1;chr1;chr1;chr1;chr1;chr1;chr1;chr1;chr1;chr1;chr1;chr1;chr1;chr1;chr1;chr1;chr1;chr1;chr1;chr1;chr1;chr1;chr1;chr1;chr1;chr1;chr1	11674480;11674481;11674525;11674678;11674748;11675082;11675082;11675082;11675082;11675082;11675656;11675657;11675658;11675658;11675658;11675658;11675658;11675700;11676046;11676046;11676046;11676046;11676046;11676046;11676046;11676809;11676809;11676848;11676848;11676848;11676848;11676848;11676848;11676872;11677543;11677543;11677543;11677543;11677543;11677543;11677543;11677543;11680353;11680353;116…	11674816;11674816;11674816;11674816;11674816;11675174;11675174;11675174;11675174;11675174;11675731;11675731;11675731;11675731;11675731;11675731;11675731;11676140;11676140;11676140;11676140;11676140;11676140;11676140;11676140;11676948;11676948;11676948;11676948;11676948;11676948;11676948;11676948;11677614;11677614;11677614;11677614;11677614;11677614;11677614;11677614;11677614;11680471;11680471;116…	3324	9.16360657121258	9.03288328128022	9.12493634432603	9.06648937243015	9.10006890320087	9.08808598006634	8.76050790760086	9.02761928137728	9.24363738368996	9.21621741809005	8.62857876294506	8.527202911255	0.913373418968078	0.960297301134728	0.991728469541673	1.20339592267651	0.981173404690289	0.932143612244808
ENSG00000162490.6	DRAXIN	gene_type protein_coding	chr1;chr1;chr1;chr1;chr1;chr1;chr1	11691729;11706249;11709275;11711851;11712340;11715119;11719584	11691853;11706709;11709465;11711965;11712429;11715208;11725857	7346	4.33963517379083	4.43382827630526	4.36473673247505	4.30835738787737	4.17203110618318	4.31549205937346	4.28233509801111	4.11146652358321	4.36577948478197	4.47769828427326	4.38456570337338	4.29078246946898	1.06746820745766	0.961674557133983	1.1045517043421	0.888307714559669	1.0806645763067	0.937062230653034
ENSG00000177674.15	AGTRAP	gene_type protein_coding	chr1;chr1;chr1;chr1;chr1;chr1;chr1;chr1;chr1;chr1;chr1;chr1;chr1;chr1;chr1;chr1;chr1;chr1;chr1;chr1;chr1;chr1;chr1;chr1;chr1;chr1;chr1;chr1;chr1;chr1;chr1;chr1;chr1;chr1;chr1;chr1;chr1;chr1;chr1;chr1;chr1;chr1;chr1;chr1;chr1;chr1;chr1;chr1;chr1;chr1;chr1;chr1;chr1;chr1;chr1;chr1;chr1;chr1;chr1;chr1;chr1;chr1;chr1;chr1;chr1;chr1;chr1;chr1	11736084;11736117;11736124;11736130;11736142;11736147;11736153;11736155;11736173;11736175;11744533;11745801;11745803;11745803;11745803;11745803;11745803;11745803;11745803;11745803;11745803;11745930;11745988;11745998;11746009;11746127;11746127;11746127;11746127;11747440;11747440;11747440;11747440;11747440;11747440;11747440;11747440;11747440;11747440;11747440;11747512;11748415;11748415;11748415;117…	11736235;11736235;11736235;11736235;11736235;11736235;11736235;11736235;11736235;11736235;11744568;11745837;11745837;11745837;11745837;11745837;11745837;11746672;11745837;11745837;11745837;11746223;11746223;11746223;11746223;11746223;11746223;11746223;11746223;11747545;11747545;11747545;11747545;11747545;11747545;11747545;11747545;11747545;11747545;11747545;11747545;11748610;11748589;11748610;117…	2435	8.52975098757579	8.31556640437548	8.35117348108862	8.33544836266113	8.38876280211927	8.47370136173509	8.27715170088603	8.53107718588794	8.48652202396286	8.36267138883469	8.01396165994839	7.81912963836025	0.862033246562056	0.989159366311676	1.06064257057827	1.19244728100393	0.917734892174831	0.873674615217518
ENSG00000215910.7	C1orf167	gene_type protein_coding	chr1;chr1;chr1;chr1;chr1;chr1;chr1;chr1;chr1;chr1;chr1;chr1;chr1;chr1;chr1;chr1;chr1;chr1;chr1;chr1;chr1;chr1;chr1;chr1;chr1;chr1;chr1;chr1;chr1;chr1;chr1;chr1;chr1;chr1;chr1;chr1;chr1;chr1;chr1;chr1;chr1;chr1;chr1;chr1;chr1;chr1;chr1;chr1;chr1;chr1;chr1;chr1;chr1;chr1;chr1;chr1;chr1;chr1;chr1;chr1;chr1;chr1;chr1;chr1;chr1;chr1;chr1;chr1;chr1	11761787;11764331;11765857;11766742;11766964;11767221;11767221;11768077;11768077;11768973;11771524;11771524;11772082;11772082;11772122;11775435;11775435;11775435;11776464;11776464;11776464;11777129;11778660;11778660;11778926;11778926;11778931;11779802;11779802;11779802;11779817;11782189;11782189;11782189;11782194;11784174;11784174;11784174;11784174;11785148;11785148;11785148;11785148;11785171;117…	11762274;11764482;11766576;11767085;11767085;11767264;11767264;11768275;11768319;11769127;11771636;11771636;11772259;11772259;11772259;11775610;11775610;11775610;11776638;11776638;11776638;11778310;11778816;11778816;11779080;11779080;11779080;11780010;11780010;11780010;11780010;11782333;11782333;11782333;11782333;11784593;11784593;11784593;11784593;11785289;11785289;11785289;11785289;11785289;117…	6499	3.55782624462725	3.55782624462725	3.55782624462725	3.55782624462725	3.55782624462725	3.55782624462725	3.55782624462725	3.55782624462725	3.55782624462725	4.14543931115403	3.55782624462725	3.55782624462725	1	1	1	1	1.50275838144031	1
ENSG00000177553.6	RP11-56N19.5	gene_type antisense	chr1;chr1;chr1	11777077;11778645;11779123	11778284;11778807;11779619	1868	3.55782624462725	3.55782624462725	3.55782624462725	3.55782624462725	3.55782624462725	3.55782624462725	3.55782624462725	3.55782624462725	3.55782624462725	3.55782624462725	3.55782624462725	3.55782624462725	1	1	1	1	1	1
ENSG00000177000.10	MTHFR	gene_type protein_coding	chr1;chr1;chr1;chr1;chr1;chr1;chr1;chr1;chr1;chr1;chr1;chr1;chr1;chr1;chr1;chr1;chr1;chr1;chr1;chr1;chr1;chr1;chr1;chr1;chr1;chr1;chr1;chr1;chr1;chr1;chr1;chr1;chr1;chr1;chr1;chr1;chr1;chr1;chr1;chr1;chr1;chr1;chr1;chr1;chr1;chr1;chr1;chr1;chr1;chr1;chr1;chr1;chr1;chr1;chr1;chr1;chr1;chr1;chr1;chr1	11785723;11785730;11786603;11788294;11791207;11791207;11791207;11791207;11792278;11792278;11792278;11792278;11793907;11793907;11793907;11793907;11794358;11794358;11794358;11794358;11794729;11794729;11794729;11794729;11795098;11795098;11795098;11795098;11796206;11796206;11796206;11796206;11800212;11800212;11800212;11800212;11801161;11801161;11801161;11801161;11801205;11802881;11802881;11802881;118…	11790898;11790898;11790898;11790898;11791326;11791326;11791326;11791326;11792379;11792379;11792379;11792379;11794089;11794089;11794089;11794089;11794538;11794538;11794538;11794538;11794863;11794863;11794863;11794863;11795348;11795348;11795348;11795348;11796399;11796399;11796399;11796399;11800322;11800322;11800322;11800322;11801399;11801399;11801399;11801399;11801399;11803129;11803129;11803129;118…	10214	7.68216758759135	7.61875566490664	7.9429129852455	7.84168337179969	8.23620557726964	7.81269215017878	8.41189115625938	8.33692072702089	8.56089355082797	8.05892174891846	7.48192512607586	7.4929072371306	0.956998174147559	0.932238103423036	0.745606619237611	0.94936157971094	0.706141003884884	1.00764126591188
ENSG00000011021.21	CLCN6	gene_type protein_coding	chr1;chr1;chr1;chr1;chr1;chr1;chr1;chr1;chr1;chr1;chr1;chr1;chr1;chr1;chr1;chr1;chr1;chr1;chr1;chr1;chr1;chr1;chr1;chr1;chr1;chr1;chr1;chr1;chr1;chr1;chr1;chr1;chr1;chr1;chr1;chr1;chr1;chr1;chr1;chr1;chr1;chr1;chr1;chr1;chr1;chr1;chr1;chr1;chr1;chr1;chr1;chr1;chr1;chr1;chr1;chr1;chr1;chr1;chr1;chr1;chr1;chr1;chr1;chr1;chr1;chr1;chr1;chr1;chr1;chr1;chr1;chr1;chr1;chr1;chr1;chr1;chr1;chr1;chr1;chr1…	11806096;11806211;11806213;11806260;11806263;11806263;11806263;11807131;11807131;11807131;11807131;11807131;11807131;11807131;11815846;11815846;11815846;11815846;11815846;11815846;11816615;11816615;11816615;11816615;11816615;11816615;11816615;11819488;11819488;11819488;11819488;11819488;11819488;11819488;11820362;11822695;11822695;11822695;11822695;11822695;11822695;11823707;11823707;11823707;118…	11806349;11806349;11806349;11806349;11806349;11806349;11806349;11807190;11807190;11807190;11807190;11807190;11807190;11807190;11815911;11815911;11815911;11815911;11815911;11815911;11816680;11816680;11816680;11816680;11816680;11816680;11816680;11819554;11819554;11819554;11819554;11819554;11819554;11819554;11820779;11822801;11822801;11822801;11822801;11822801;11822801;11823833;11823833;11823833;118…	6938	6.91580917222709	7.2609070764462	7.2936483877765	6.93525673779359	7.47334855518894	7.28166099412973	7.64956215448276	7.35010898998027	7.68507141475052	7.33404688374868	6.73749095227309	6.78511035340926	1.270237180492	0.780033694837525	0.875580930372387	0.812560328815663	0.784027122682924	1.03355803626943
ENSG00000242349.5	NPPA-AS1	gene_type antisense	chr1;chr1;chr1;chr1;chr1;chr1;chr1	11841017;11843704;11843861;11845547;11845547;11847434;11847577	11841207;11844073;11844073;11845766;11845766;11847684;11848079	1427	3.95230142254003	3.95438272415751	3.96520609223261	3.99438106532615	4.17203110618318	3.55782624462725	4.28233509801111	4.11146652358321	3.96574265195466	4.14543931115403	3.55782624462725	3.9840131269933	1.00144368946577	1.02042841145107	0.653289853716818	0.888307714559669	1.13264571037339	1.34367747037693
ENSG00000276470.1	NPPA-AS1_1	gene_type misc_RNA	chr1	11843812	11843984	173	3.55782624462725	3.55782624462725	3.55782624462725	3.55782624462725	3.55782624462725	3.55782624462725	3.55782624462725	3.55782624462725	3.55782624462725	3.55782624462725	3.55782624462725	3.55782624462725	1	1	1	1	1	1
ENSG00000278852.1	NPPA-AS1_2	gene_type misc_RNA	chr1	11845549	11845697	149	3.55782624462725	3.55782624462725	3.55782624462725	3.55782624462725	3.55782624462725	3.55782624462725	3.55782624462725	3.55782624462725	3.55782624462725	3.55782624462725	3.55782624462725	3.55782624462725	1	1	1	1	1	1
ENSG00000175206.10	NPPA	gene_type protein_coding	chr1;chr1;chr1;chr1;chr1;chr1;chr1;chr1;chr1;chr1	11845709;11845712;11845879;11846012;11847113;11847113;11847113;11847562;11847562;11848081	11846014;11846008;11846014;11846014;11847439;11847439;11847439;11847783;11847783;11848345	1120	3.55782624462725	3.55782624462725	3.96520609223261	3.55782624462725	3.99376167689582	3.9399101021215	4.1514250525846	3.95050242154829	3.55782624462725	3.55782624462725	3.55782624462725	3.55782624462725	1	0.753991493562934	0.963361000009112	0.869994007565042	1	1
ENSG00000275915.1	NPPA-AS1_3	gene_type misc_RNA	chr1	11847442	11847549	108	3.55782624462725	3.55782624462725	3.55782624462725	3.55782624462725	3.55782624462725	3.55782624462725	3.55782624462725	3.55782624462725	3.55782624462725	3.55782624462725	3.55782624462725	3.55782624462725	1	1	1	1	1	1
ENSG00000120937.8	NPPB	gene_type protein_coding	chr1;chr1;chr1	11857464;11858214;11858702	11857671;11858469;11858931	694	3.55782624462725	3.55782624462725	3.96520609223261	3.55782624462725	3.55782624462725	3.55782624462725	3.55782624462725	3.55782624462725	3.55782624462725	3.97475709050258	3.55782624462725	3.55782624462725	1	0.753991493562934	1	1	1.33508430584895	1
ENSG00000224904.1	RP5-934G17.6	gene_type processed_pseudogene	chr1	11877770	11880406	2637	3.55782624462725	3.55782624462725	3.55782624462725	3.55782624462725	3.55782624462725	3.55782624462725	3.55782624462725	3.95050242154829	3.55782624462725	3.97475709050258	3.55782624462725	3.55782624462725	1	1	1	1.31282641920024	1.33508430584895	1
ENSG00000199347.1	RNU5E-1	gene_type snRNA	chr1	11908152	11908271	120	4.50974017200837	4.11690410408451	4.36473673247505	4.60791311011023	4.17203110618318	4.21583248886372	3.97903344337653	4.11146652358321	4.68643555104792	4.56224313213017	4.38456570337338	4.66234229816799	0.761630908336319	1.18359571418351	1.03082639408898	1.09614076572392	0.917517500592783	1.21232507272907
ENSG00000201801.1	RNU5E-4P	gene_type snRNA	chr1	11909808	11909927	120	4.11398763489342	3.95438272415751	4.36473673247505	3.55782624462725	4.30730794355666	4.21583248886372	3.97903344337653	3.55782624462725	3.55782624462725	3.97475709050258	4.14636171533227	3.9840131269933	0.895270211592215	0.571604631871035	0.93856238364715	0.746799466090436	1.33508430584895	0.893569229371001
ENSG00000116685.15	KIAA2013	gene_type protein_coding	chr1;chr1;chr1;chr1;chr1;chr1;chr1;chr1;chr1	11919591;11920183;11922175;11922636;11922636;11925205;11925205;11925205;11926303	11920332;11920332;11923489;11923489;11923489;11926428;11926269;11926423;11926403	3281	9.27305829034364	10.122690148469	9.68982551290773	10.0674840164134	9.78734204088449	10.1953562670402	9.86146307142584	10.201861206256	10.0984103687819	10.1006802547927	9.30692360310797	9.50227386963346	1.80204102801982	1.29923148843478	1.3268582244424	1.26610594800151	1.00157460347678	1.14500211763088
ENSG00000083444.16	PLOD1	gene_type protein_coding	chr1;chr1;chr1;chr1;chr1;chr1;chr1;chr1;chr1;chr1;chr1;chr1;chr1;chr1;chr1;chr1;chr1;chr1;chr1;chr1;chr1;chr1;chr1;chr1;chr1;chr1;chr1;chr1;chr1;chr1;chr1;chr1;chr1;chr1;chr1;chr1;chr1;chr1;chr1;chr1;chr1;chr1;chr1;chr1;chr1;chr1;chr1;chr1;chr1;chr1;chr1;chr1;chr1;chr1;chr1;chr1;chr1;chr1;chr1;chr1;chr1;chr1	11934205;11934694;11934734;11934743;11934753;11944522;11947976;11947976;11947976;11947976;11947976;11949773;11949773;11949773;11949773;11949773;11950357;11950357;11950357;11950357;11950357;11952623;11952623;11952623;11952623;11952623;11954301;11954574;11954830;11954830;11954830;11956917;11956917;11956917;11957090;11957842;11957842;11957842;11957842;11958516;11958516;11958516;11960646;11963532;119…	11934323;11934855;11934855;11934855;11934855;11944662;11948067;11948067;11948067;11948067;11948067;11949906;11949906;11949906;11949906;11949906;11950520;11950520;11950520;11950520;11950520;11952735;11952735;11952735;11952691;11952735;11954893;11954767;11954893;11954893;11954893;11957014;11957014;11957014;11957193;11957943;11957943;11957943;11957943;11958593;11958647;11958620;11960767;11963636;119…	5320	9.8145575036751	9.95189718461828	9.73213789901512	9.93762021690808	9.91427856358398	9.92515399016399	10.0562585922342	10.2904893923596	9.55496039754189	9.48111315468423	9.55962089132631	9.37080666965231	1.09987508319585	1.15307177419575	1.00756675556734	1.17627941460426	0.95010097726436	0.877326516306182
ENSG00000116688.16	MFN2	gene_type protein_coding	chr1;chr1;chr1;chr1;chr1;chr1;chr1;chr1;chr1;chr1;chr1;chr1;chr1;chr1;chr1;chr1;chr1;chr1;chr1;chr1;chr1;chr1;chr1;chr1;chr1;chr1;chr1;chr1;chr1;chr1;chr1;chr1;chr1;chr1;chr1;chr1;chr1;chr1;chr1;chr1;chr1;chr1;chr1;chr1;chr1;chr1;chr1;chr1;chr1;chr1;chr1;chr1	11980181;11980299;11980312;11980370;11980435;11981810;11981970;11981970;11981970;11981992;11982523;11989165;11989165;11989165;11989165;11989165;11989165;11992279;11992555;11992555;11992555;11992555;11996156;11996156;11997297;11997297;11998770;11998770;11998988;11998988;12001401;12001401;12001769;12001769;12001982;12001982;12003992;12003992;12004509;12004509;12004825;12004825;12005711;12005711;120…	11980484;11980484;11980484;11980484;11980484;11981853;11982114;11982114;11982114;11982114;11982590;11989343;11989343;11989343;11989234;11989343;11989343;11992463;11992673;11992640;11992690;11992690;11996318;11996318;11997421;11997421;11998878;11998878;11999095;11999095;12001554;12001554;12001836;12001836;12002103;12002103;12004118;12004118;12004613;12004613;12004927;12004927;12005931;12005931;120…	4973	10.5130828455498	10.6416358665546	10.8873175972339	10.9420243712655	10.8278767657276	10.8275501678705	10.542438151305	10.8012300442609	10.7094827626327	10.601432829045	10.3267323552351	10.1851375629057	1.09319670836898	1.03864797793632	0.999773645238297	1.19647636048984	0.927841362096056	0.906516514497457
ENSG00000270914.1	RP5-1077B9.5	gene_type processed_pseudogene	chr1	12017216	12017308	93	3.55782624462725	3.55782624462725	3.55782624462725	3.55782624462725	3.55782624462725	3.55782624462725	3.55782624462725	3.55782624462725	3.55782624462725	3.55782624462725	3.55782624462725	3.55782624462725	1	1	1	1	1	1
ENSG00000116691.10	MIIP	gene_type protein_coding	chr1;chr1;chr1;chr1;chr1;chr1;chr1;chr1;chr1;chr1;chr1;chr1;chr1;chr1;chr1;chr1;chr1;chr1;chr1;chr1;chr1;chr1;chr1;chr1;chr1;chr1;chr1;chr1;chr1;chr1;chr1;chr1;chr1;chr1;chr1;chr1;chr1;chr1	12019466;12019466;12021645;12022095;12022095;12022222;12022833;12022833;12022833;12022864;12028721;12029033;12029033;12029033;12029033;12029096;12029223;12029223;12029223;12029223;12029223;12029223;12029765;12029765;12029765;12030028;12030028;12030028;12031127;12031266;12031266;12031266;12031266;12031541;12031722;12031722;12031722;12031722	12019552;12019552;12021840;12022442;12022442;12022442;12022917;12022917;12022917;12022917;12029141;12029141;12029141;12029141;12029141;12029141;12029607;12029281;12030124;12029894;12029281;12029281;12029894;12029894;12029855;12030124;12030124;12030124;12031403;12031403;12031403;12031403;12031403;12032025;12032039;12032043;12031975;12032045	2821	7.43765637315502	7.86648906650405	7.81519311208457	7.90861415316342	7.87848021755576	7.96952937792276	7.56705310817973	7.96276786629556	7.94638724664956	7.90612620857088	7.22691700120658	7.21834056804253	1.34614395042332	1.06689710231793	1.06514449796767	1.31559438708507	0.972478973278575	0.994072904480934
ENSG00000202461.1	Y_RNA	gene_type misc_RNA	chr1	12024012	12024124	113	3.55782624462725	3.55782624462725	3.55782624462725	3.55782624462725	3.55782624462725	3.55782624462725	3.55782624462725	3.55782624462725	3.55782624462725	3.55782624462725	3.55782624462725	3.55782624462725	1	1	1	1	1	1
ENSG00000276869.1	MIR6729	gene_type miRNA	chr1	12029158	12029222	65	3.55782624462725	3.55782624462725	3.55782624462725	3.55782624462725	3.55782624462725	3.55782624462725	3.55782624462725	3.55782624462725	3.55782624462725	3.55782624462725	3.55782624462725	3.55782624462725	1	1	1	1	1	1
ENSG00000243539.3	RN7SL649P	gene_type misc_RNA	chr1	12036740	12037014	275	3.55782624462725	3.55782624462725	3.55782624462725	3.55782624462725	3.55782624462725	3.55782624462725	3.55782624462725	3.55782624462725	3.55782624462725	3.55782624462725	3.55782624462725	3.55782624462725	1	1	1	1	1	1
ENSG00000120949.14	TNFRSF8	gene_type protein_coding	chr1;chr1;chr1;chr1;chr1;chr1;chr1;chr1;chr1;chr1;chr1;chr1;chr1;chr1;chr1;chr1;chr1;chr1;chr1;chr1;chr1;chr1;chr1;chr1;chr1;chr1;chr1;chr1;chr1;chr1;chr1;chr1;chr1;chr1;chr1;chr1;chr1;chr1;chr1;chr1;chr1;chr1;chr1;chr1;chr1;chr1;chr1;chr1;chr1;chr1;chr1;chr1	12063377;12063377;12063470;12084464;12097101;12097101;12097101;12104379;12104379;12104379;12109566;12109566;12109566;12110041;12110041;12110041;12111898;12111898;12111898;12115577;12115577;12115577;12123284;12123284;12123284;12123715;12123715;12123715;12125899;12125934;12125951;12125951;12125951;12126183;12126183;12126183;12126183;12126183;12135588;12135588;12135588;12135588;12135588;12138229;121…	12063661;12063661;12063661;12084551;12097217;12097217;12097217;12104531;12104531;12104531;12109656;12109656;12109656;12110204;12110204;12110204;12112014;12112014;12112014;12115729;12115729;12115729;12123377;12123377;12123377;12123827;12123827;12123827;12126052;12126052;12126052;12126052;12126052;12126236;12126236;12126236;12126236;12126236;12135613;12135613;12135613;12135613;12135613;12138436;121…	3738	3.55782624462725	3.55782624462725	3.55782624462725	3.99438106532615	3.55782624462725	3.55782624462725	3.55782624462725	3.55782624462725	3.96574265195466	3.97475709050258	3.55782624462725	3.55782624462725	1	1.35336859919879	1	1	1.0062678942155	1
ENSG00000201135.1	RNU6-777P	gene_type snRNA	chr1	12077881	12077984	104	3.55782624462725	3.55782624462725	3.55782624462725	3.55782624462725	3.55782624462725	3.55782624462725	3.55782624462725	3.55782624462725	3.55782624462725	3.55782624462725	3.55782624462725	3.55782624462725	1	1	1	1	1	1
ENSG00000227875.2	RPL23AP89	gene_type processed_pseudogene	chr1	12080293	12080547	255	3.55782624462725	3.55782624462725	3.55782624462725	3.55782624462725	3.55782624462725	3.55782624462725	3.55782624462725	3.55782624462725	3.55782624462725	3.55782624462725	3.55782624462725	3.55782624462725	1	1	1	1	1	1
ENSG00000283789.1	MIR7846	gene_type miRNA	chr1	12166943	12167038	96	3.55782624462725	3.55782624462725	3.55782624462725	3.55782624462725	3.55782624462725	3.55782624462725	3.55782624462725	3.55782624462725	3.55782624462725	3.55782624462725	3.55782624462725	3.55782624462725	1	1	1	1	1	1
ENSG00000028137.18	TNFRSF1B	gene_type protein_coding	chr1;chr1;chr1;chr1;chr1;chr1;chr1;chr1;chr1;chr1;chr1;chr1;chr1;chr1;chr1;chr1;chr1;chr1;chr1;chr1;chr1;chr1;chr1;chr1;chr1;chr1;chr1	12167003;12167003;12167003;12188796;12188796;12190957;12190957;12190957;12191774;12191774;12191774;12191838;12192348;12192348;12192431;12192431;12192863;12192863;12192863;12193955;12193955;12194584;12194584;12201967;12201967;12206740;12206740	12167169;12167169;12167169;12188895;12188895;12191085;12191085;12191085;12191923;12191923;12191923;12191923;12192524;12192358;12192524;12192524;12193008;12193098;12193098;12194032;12194032;12194618;12194618;12202171;12202171;12209228;12209228	3766	3.55782624462725	4.11690410408451	3.55782624462725	4.17289735623919	3.55782624462725	3.9399101021215	3.55782624462725	3.95050242154829	3.55782624462725	4.47769828427326	3.55782624462725	4.49757563693745	1.47332719628631	1.53163349069426	1.30322289775605	1.31282641920024	1.89194747904902	1.91819500386474
ENSG00000263676.1	MIR4632	gene_type miRNA	chr1	12191713	12191773	61	3.55782624462725	3.55782624462725	3.55782624462725	3.55782624462725	3.55782624462725	3.55782624462725	3.55782624462725	3.55782624462725	3.55782624462725	3.55782624462725	3.55782624462725	3.55782624462725	1	1	1	1	1	1
ENSG00000225196.2	RPL10P17	gene_type processed_pseudogene	chr1	12220794	12221109	316	3.55782624462725	3.55782624462725	3.55782624462725	3.55782624462725	3.55782624462725	3.55782624462725	3.55782624462725	3.55782624462725	3.55782624462725	3.55782624462725	3.55782624462725	3.55782624462725	1	1	1	1	1	1
ENSG00000252969.1	SNORA70	gene_type snoRNA	chr1	12221148	12221271	124	3.55782624462725	3.55782624462725	3.55782624462725	3.55782624462725	3.55782624462725	3.55782624462725	3.55782624462725	3.55782624462725	3.55782624462725	3.55782624462725	3.55782624462725	3.55782624462725	1	1	1	1	1	1
ENSG00000048707.13	VPS13D	gene_type protein_coding	chr1;chr1;chr1;chr1;chr1;chr1;chr1;chr1;chr1;chr1;chr1;chr1;chr1;chr1;chr1;chr1;chr1;chr1;chr1;chr1;chr1;chr1;chr1;chr1;chr1;chr1;chr1;chr1;chr1;chr1;chr1;chr1;chr1;chr1;chr1;chr1;chr1;chr1;chr1;chr1;chr1;chr1;chr1;chr1;chr1;chr1;chr1;chr1;chr1;chr1;chr1;chr1;chr1;chr1;chr1;chr1;chr1;chr1;chr1;chr1;chr1;chr1;chr1;chr1;chr1;chr1;chr1;chr1;chr1;chr1;chr1;chr1;chr1;chr1;chr1;chr1;chr1;chr1;chr1;chr1…	12230067;12230067;12234191;12234191;12242513;12242513;12244246;12244246;12244424;12244537;12244537;12244537;12249223;12249223;12249223;12253722;12253722;12253734;12256276;12256333;12256333;12256987;12256987;12256987;12257935;12257935;12257935;12260693;12260693;12260948;12260948;12261901;12261901;12266881;12266881;12267845;12267845;12268706;12268706;12270994;12270994;12273003;12273003;12275825;122…	12230120;12230120;12234363;12234363;12242590;12242590;12244436;12244436;12244436;12244617;12244617;12244617;12249603;12249339;12249339;12253826;12253826;12253826;12256503;12256503;12256503;12257087;12257087;12257087;12257955;12258103;12258103;12260794;12260794;12261149;12261149;12262080;12262080;12267011;12267011;12267920;12267920;12268876;12268876;12271124;12271124;12273135;12273135;12278038;122…	20023	9.36512179492511	9.58220809051475	9.5548869173273	9.71693071025051	9.74606526224186	9.66359131875775	9.80224239480329	9.54269043902697	9.21630260170105	9.22818386069405	9.16924861617608	9.35720362900552	1.16238363404888	1.11887106378565	0.944436730673323	0.83534730510107	1.00826946586688	1.13914785492779
ENSG00000239149.1	SNORA59A	gene_type snoRNA	chr1	12507246	12507397	152	3.55782624462725	4.24046069271801	4.13206609265227	3.55782624462725	3.99376167689582	3.9399101021215	4.39158453445309	3.95050242154829	4.13281753800557	3.97475709050258	4.14636171533227	3.55782624462725	1.60506803171848	0.67164004343305	0.963361000009112	0.736581918176769	0.896229147663079	0.665017646772281
ENSG00000229484.1	RP5-888M10.2	gene_type lincRNA	chr1;chr1	12527724;12528052	12527792;12528420	438	3.55782624462725	3.55782624462725	3.55782624462725	3.99438106532615	3.55782624462725	3.55782624462725	3.55782624462725	3.55782624462725	3.55782624462725	3.97475709050258	3.55782624462725	3.55782624462725	1	1.35336859919879	1	1	1.33508430584895	1
ENSG00000162496.8	DHRS3	gene_type protein_coding	chr1;chr1;chr1;chr1;chr1;chr1;chr1;chr1;chr1;chr1;chr1;chr1;chr1;chr1;chr1;chr1	12567910;12568392;12572728;12572728;12578718;12578718;12579293;12579293;12579768;12580523;12580523;12580523;12595986;12616560;12616560;12617154	12568424;12568424;12572853;12572853;12578956;12578956;12579412;12579412;12580666;12580666;12580666;12580666;12596308;12616696;12616795;12617731	3036	8.07323438315632	8.0437588094888	7.2311089895576	7.39512661441534	7.98744347764616	7.63052416158756	9.76751627783228	9.45876825692664	8.09409437387163	7.83262308881406	8.83428183187482	8.35523994095857	0.979776386119503	1.12040290164757	0.78083015997398	0.807342071426205	0.834236716606306	0.71745393459915
ENSG00000221340.1	RNU6ATAC18P	gene_type snRNA	chr1	12569972	12570072	101	3.95230142254003	3.55782624462725	3.55782624462725	3.55782624462725	3.55782624462725	3.55782624462725	4.28233509801111	3.95050242154829	3.96574265195466	3.97475709050258	3.55782624462725	3.55782624462725	0.760766076973291	1	1	0.794526543812463	1.0062678942155	1
ENSG00000276830.1	MIR6730	gene_type miRNA	chr1	12578957	12579023	67	3.55782624462725	3.55782624462725	3.55782624462725	3.55782624462725	3.55782624462725	3.55782624462725	3.55782624462725	3.95050242154829	3.55782624462725	3.55782624462725	3.55782624462725	3.55782624462725	1	1	1	1.31282641920024	1	1
ENSG00000272482.1	RP11-474O21.5	gene_type lincRNA	chr1	12618900	12619244	345	4.11398763489342	3.55782624462725	4.13206609265227	3.55782624462725	3.99376167689582	4.09661836972613	5.06935440212042	4.92614825130183	3.96574265195466	3.97475709050258	4.14636171533227	4.29078246946898	0.680109340014304	0.67164004343305	1.07389779287468	0.905504583634423	1.0062678942155	1.10528678865954
ENSG00000204518.2	AADACL4	gene_type protein_coding	chr1;chr1;chr1;chr1	12644547;12651123;12661791;12665961	12644714;12651339;12661854;12667086	1575	3.55782624462725	3.55782624462725	3.55782624462725	3.55782624462725	3.55782624462725	3.55782624462725	3.55782624462725	3.55782624462725	3.55782624462725	3.55782624462725	3.55782624462725	3.55782624462725	1	1	1	1	1	1
ENSG00000226166.2	RP11-474O21.2	gene_type processed_pseudogene	chr1	12692909	12693020	112	3.55782624462725	3.55782624462725	3.55782624462725	3.55782624462725	3.55782624462725	3.55782624462725	3.55782624462725	3.55782624462725	3.55782624462725	3.55782624462725	3.55782624462725	3.55782624462725	1	1	1	1	1	1
ENSG00000188984.11	AADACL3	gene_type protein_coding	chr1;chr1;chr1;chr1;chr1;chr1;chr1	12716115;12716143;12719475;12720883;12720883;12725222;12725222	12716344;12716344;12719691;12720946;12720946;12728759;12728400	4049	3.55782624462725	3.55782624462725	3.55782624462725	3.55782624462725	3.55782624462725	3.55782624462725	3.55782624462725	3.55782624462725	3.55782624462725	3.55782624462725	3.55782624462725	3.55782624462725	1	1	1	1	1	1
ENSG00000157330.9	C1orf158	gene_type protein_coding	chr1;chr1;chr1;chr1;chr1;chr1;chr1;chr1;chr1	12746215;12746387;12746425;12753358;12755700;12759310;12759310;12760770;12760770	12746541;12746541;12746541;12753926;12755813;12759487;12759487;12761169;12763699	4118	3.55782624462725	3.55782624462725	3.55782624462725	3.55782624462725	3.55782624462725	3.55782624462725	3.55782624462725	3.55782624462725	3.55782624462725	4.27507766239493	3.55782624462725	3.55782624462725	1	1	1	1	1.64404685687777	1
ENSG00000116726.4	PRAMEF12	gene_type protein_coding	chr1;chr1;chr1	12774841;12775543;12777011	12775154;12776118;12777906	1786	3.55782624462725	3.55782624462725	3.55782624462725	3.55782624462725	3.55782624462725	3.55782624462725	3.55782624462725	3.55782624462725	3.55782624462725	3.55782624462725	3.55782624462725	3.55782624462725	1	1	1	1	1	1
ENSG00000116721.9	PRAMEF1	gene_type protein_coding	chr1;chr1;chr1;chr1;chr1;chr1	12791397;12793203;12793915;12794691;12795438;12795438	12791474;12793514;12794493;12794969;12796628;12796485	2439	3.55782624462725	3.55782624462725	3.55782624462725	3.55782624462725	3.55782624462725	3.55782624462725	3.55782624462725	3.55782624462725	3.55782624462725	3.55782624462725	3.55782624462725	3.55782624462725	1	1	1	1	1	1
ENSG00000228338.1	LINC01784	gene_type lincRNA	chr1;chr1	12822686;12823036	12822939;12823159	378	3.55782624462725	3.55782624462725	3.55782624462725	3.55782624462725	3.55782624462725	3.55782624462725	3.55782624462725	3.55782624462725	3.55782624462725	3.55782624462725	3.55782624462725	3.55782624462725	1	1	1	1	1	1
ENSG00000239810.3	PRAMEF11	gene_type protein_coding	chr1;chr1;chr1;chr1	12824605;12827249;12828497;12831356	12825503;12827830;12828805;12831410	1845	3.55782624462725	3.55782624462725	3.55782624462725	3.55782624462725	3.55782624462725	3.55782624462725	3.55782624462725	3.55782624462725	3.55782624462725	3.55782624462725	3.55782624462725	3.55782624462725	1	1	1	1	1	1
ENSG00000231103.2	PRAMEF30P	gene_type unprocessed_pseudogene	chr1;chr1;chr1;chr1	12838125;12838483;12840102;12841075	12838204;12838959;12840678;12841357	1417	3.55782624462725	3.55782624462725	3.55782624462725	3.55782624462725	3.55782624462725	3.55782624462725	3.55782624462725	3.55782624462725	3.55782624462725	3.55782624462725	3.55782624462725	3.55782624462725	1	1	1	1	1	1
ENSG00000179172.9	HNRNPCL1	gene_type protein_coding	chr1;chr1	12847408;12848681	12848470;12848725	1108	3.55782624462725	3.55782624462725	3.55782624462725	3.55782624462725	3.55782624462725	3.55782624462725	3.55782624462725	3.55782624462725	3.55782624462725	3.55782624462725	3.55782624462725	3.55782624462725	1	1	1	1	1	1
ENSG00000120952.4	PRAMEF2	gene_type protein_coding	chr1;chr1;chr1;chr1	12857086;12858985;12859693;12861221	12857147;12859296;12860271;12861909	1642	3.55782624462725	3.55782624462725	3.55782624462725	3.55782624462725	3.55782624462725	3.55782624462725	3.55782624462725	3.55782624462725	3.55782624462725	3.55782624462725	3.55782624462725	3.55782624462725	1	1	1	1	1	1
ENSG00000243073.3	PRAMEF4	gene_type protein_coding	chr1;chr1;chr1;chr1	12879224;12881854;12883102;12886147	12880105;12882435;12883410;12886201	1828	3.55782624462725	3.55782624462725	3.55782624462725	3.55782624462725	3.55782624462725	3.55782624462725	3.55782624462725	3.55782624462725	3.55782624462725	3.55782624462725	3.55782624462725	3.55782624462725	1	1	1	1	1	1
ENSG00000187545.5	PRAMEF10	gene_type protein_coding	chr1;chr1;chr1;chr1	12892896;12894586;12895561;12898216	12893474;12895164;12895872;12898270	1525	3.55782624462725	3.55782624462725	3.55782624462725	3.55782624462725	3.55782624462725	3.55782624462725	3.55782624462725	3.55782624462725	3.55782624462725	3.55782624462725	3.55782624462725	3.55782624462725	1	1	1	1	1	1
ENSG00000204510.5	PRAMEF7	gene_type protein_coding	chr1;chr1;chr1;chr1;chr1;chr1;chr1	12916610;12917625;12917693;12918362;12918362;12919852;12919852	12916707;12917979;12917979;12918937;12918937;12920482;12920480	1660	3.55782624462725	3.55782624462725	3.55782624462725	3.55782624462725	3.55782624462725	3.55782624462725	3.55782624462725	3.55782624462725	3.55782624462725	3.55782624462725	3.55782624462725	3.55782624462725	1	1	1	1	1	1
ENSG00000207434.1	RNU6-1072P	gene_type snRNA	chr1	12922554	12922660	107	3.55782624462725	3.55782624462725	3.55782624462725	3.55782624462725	3.55782624462725	3.55782624462725	3.55782624462725	3.55782624462725	3.55782624462725	3.55782624462725	3.55782624462725	3.55782624462725	1	1	1	1	1	1
ENSG00000234064.1	PRAMEF29P	gene_type unprocessed_pseudogene	chr1;chr1	12926162;12927695	12926741;12928253	1139	3.55782624462725	3.55782624462725	3.55782624462725	3.55782624462725	3.55782624462725	3.55782624462725	3.55782624462725	3.55782624462725	3.55782624462725	3.55782624462725	3.55782624462725	3.55782624462725	1	1	1	1	1	1
ENSG00000232423.6	PRAMEF6	gene_type protein_coding	chr1;chr1;chr1;chr1;chr1;chr1;chr1;chr1	12938472;12938472;12940984;12940984;12942232;12942232;12945353;12947517	12939236;12939236;12941565;12941565;12942540;12942540;12945416;12947580	1784	3.55782624462725	3.55782624462725	3.55782624462725	3.55782624462725	3.55782624462725	3.55782624462725	3.55782624462725	3.55782624462725	3.55782624462725	3.55782624462725	3.55782624462725	3.55782624462725	1	1	1	1	1	1
ENSG00000274178.2	PRAMEF28P	gene_type unprocessed_pseudogene	chr1;chr1;chr1	13029339;13030047;13031572	13029650;13030625;13032130	1450	3.55782624462725	3.55782624462725	3.55782624462725	3.55782624462725	3.55782624462725	3.55782624462725	3.55782624462725	3.55782624462725	3.55782624462725	3.55782624462725	3.55782624462725	3.55782624462725	1	1	1	1	1	1
ENSG00000274764.5	PRAMEF27	gene_type protein_coding	chr1;chr1;chr1;chr1	13049476;13052118;13053367;13056414	13050369;13052699;13053675;13056491	1863	3.55782624462725	3.55782624462725	3.55782624462725	3.55782624462725	3.55782624462725	3.55782624462725	3.55782624462725	3.55782624462725	3.55782624462725	3.55782624462725	3.55782624462725	3.55782624462725	1	1	1	1	1	1
ENSG00000277058.2	HNRNPCL3	gene_type protein_coding	chr1;chr1	13060869;13061144	13060930;13062229	1148	3.55782624462725	3.55782624462725	3.55782624462725	3.55782624462725	3.55782624462725	3.55782624462725	3.55782624462725	3.55782624462725	3.55782624462725	3.55782624462725	3.55782624462725	3.55782624462725	1	1	1	1	1	1
ENSG00000229571.7	PRAMEF25	gene_type protein_coding	chr1;chr1;chr1;chr1;chr1;chr1;chr1;chr1	13068677;13070853;13073678;13073678;13074659;13074659;13076991;13076991	13068754;13070907;13073986;13073986;13075240;13075240;13077884;13077884	1918	3.55782624462725	3.55782624462725	3.55782624462725	3.55782624462725	3.55782624462725	3.55782624462725	3.55782624462725	3.55782624462725	3.55782624462725	3.55782624462725	3.55782624462725	3.55782624462725	1	1	1	1	1	1
ENSG00000277862.1	PRAMEF34P	gene_type unprocessed_pseudogene	chr1;chr1;chr1	13095179;13096713;13097685	13095762;13097288;13097971	1447	3.55782624462725	3.55782624462725	3.55782624462725	3.55782624462725	3.55782624462725	3.55782624462725	3.55782624462725	3.55782624462725	3.55782624462725	3.55782624462725	3.55782624462725	3.55782624462725	1	1	1	1	1	1
ENSG00000236179.1	PRAMEF35P	gene_type unprocessed_pseudogene	chr1;chr1	13104403;13105378	13104981;13105689	891	3.55782624462725	3.55782624462725	3.55782624462725	3.55782624462725	3.55782624462725	3.55782624462725	3.55782624462725	3.55782624462725	3.55782624462725	3.55782624462725	3.55782624462725	3.55782624462725	1	1	1	1	1	1
ENSG00000275774.2	HNRNPCL2	gene_type protein_coding	chr1;chr1	13115496;13116793	13116581;13116854	1148	3.55782624462725	3.55782624462725	3.55782624462725	3.55782624462725	3.55782624462725	3.55782624462725	3.55782624462725	3.55782624462725	3.55782624462725	3.55782624462725	3.55782624462725	3.55782624462725	1	1	1	1	1	1
ENSG00000229978.1	PRAMEF36P	gene_type transcribed_unprocessed_pseudogene	chr1;chr1;chr1;chr1;chr1	13128818;13129501;13129793;13131027;13131027	13129104;13130076;13130076;13131615;13131409	1452	3.55782624462725	3.55782624462725	3.55782624462725	3.55782624462725	3.55782624462725	3.55782624462725	3.55782624462725	3.55782624462725	3.55782624462725	3.55782624462725	3.55782624462725	3.55782624462725	1	1	1	1	1	1
ENSG00000233336.1	RP13-221M14.2	gene_type lincRNA	chr1;chr1	13146981;13147337	13147240;13147460	384	3.55782624462725	3.55782624462725	3.55782624462725	3.55782624462725	3.55782624462725	3.55782624462725	3.55782624462725	3.55782624462725	3.55782624462725	3.55782624462725	3.55782624462725	3.55782624462725	1	1	1	1	1	1
ENSG00000280267.4	PRAMEF26	gene_type protein_coding	chr1;chr1;chr1;chr1	13148905;13151549;13152803;13155884	13149798;13152130;13153111;13155961	1863	3.55782624462725	3.55782624462725	3.55782624462725	3.55782624462725	3.55782624462725	3.55782624462725	3.55782624462725	3.55782624462725	3.55782624462725	3.55782624462725	3.55782624462725	3.55782624462725	1	1	1	1	1	1
ENSG00000179412.10	HNRNPCL4	gene_type protein_coding	chr1	13164586	13165467	882	3.55782624462725	3.55782624462725	3.55782624462725	3.55782624462725	3.55782624462725	3.55782624462725	3.55782624462725	3.55782624462725	3.55782624462725	3.55782624462725	3.55782624462725	3.55782624462725	1	1	1	1	1	1
ENSG00000204505.4	PRAMEF9	gene_type protein_coding	chr1;chr1;chr1;chr1	13172455;13175265;13176241;13178571	13172532;13175573;13176822;13179464	1863	3.55782624462725	3.55782624462725	3.55782624462725	3.55782624462725	3.55782624462725	3.55782624462725	3.55782624462725	3.55782624462725	3.55782624462725	3.55782624462725	3.55782624462725	3.55782624462725	1	1	1	1	1	1
ENSG00000279169.2	PRAMEF13	gene_type protein_coding	chr1;chr1;chr1;chr1;chr1;chr1	13196330;13196745;13197852;13198328;13199303;13201332	13197381;13197381;13198130;13198906;13199614;13201409	2300	3.55782624462725	3.55782624462725	3.55782624462725	3.55782624462725	3.55782624462725	3.55782624462725	3.55782624462725	3.55782624462725	3.55782624462725	3.55782624462725	3.55782624462725	3.55782624462725	1	1	1	1	1	1
ENSG00000279804.2	PRAMEF18	gene_type protein_coding	chr1;chr1;chr1	13222705;13224855;13225820	13223905;13225433;13226106	2067	3.55782624462725	3.55782624462725	3.55782624462725	3.55782624462725	3.55782624462725	3.55782624462725	3.55782624462725	3.55782624462725	3.55782624462725	3.55782624462725	3.55782624462725	3.55782624462725	1	1	1	1	1	1
ENSG00000250894.1	PRAMEF31P	gene_type unprocessed_pseudogene	chr1;chr1;chr1	13245863;13246546;13248145	13246149;13247121;13248652	1371	3.55782624462725	3.55782624462725	3.55782624462725	3.55782624462725	3.55782624462725	3.55782624462725	3.55782624462725	3.55782624462725	3.55782624462725	3.55782624462725	3.55782624462725	3.55782624462725	1	1	1	1	1	1
ENSG00000270601.4	PRAMEF5	gene_type protein_coding	chr1;chr1;chr1;chr1	13254212;13259247;13260222;13262550	13254275;13259555;13260803;13263314	1720	3.55782624462725	3.55782624462725	3.55782624462725	3.55782624462725	3.55782624462725	3.55782624462725	3.55782624462725	3.55782624462725	3.55782624462725	3.55782624462725	3.55782624462725	3.55782624462725	1	1	1	1	1	1
ENSG00000231219.1	PRAMEF32P	gene_type unprocessed_pseudogene	chr1;chr1	13273539;13275133	13274111;13275627	1068	3.55782624462725	3.55782624462725	3.55782624462725	3.55782624462725	3.55782624462725	3.55782624462725	3.55782624462725	3.55782624462725	3.55782624462725	3.55782624462725	3.55782624462725	3.55782624462725	1	1	1	1	1	1
ENSG00000207511.1	RNU6-771P	gene_type snRNA	chr1	13279125	13279231	107	3.55782624462725	3.55782624462725	3.55782624462725	3.55782624462725	3.55782624462725	3.55782624462725	3.55782624462725	3.55782624462725	3.55782624462725	3.55782624462725	3.55782624462725	3.55782624462725	1	1	1	1	1	1
ENSG00000182330.10	PRAMEF8	gene_type protein_coding	chr1;chr1;chr1;chr1;chr1;chr1;chr1;chr1;chr1;chr1;chr1	13281035;13281168;13281302;13282847;13282847;13282847;13283805;13283805;13283805;13285077;13285097	13281932;13281932;13281932;13283422;13283422;13283422;13284091;13284169;13284116;13285174;13285154	1937	3.55782624462725	3.55782624462725	3.55782624462725	3.55782624462725	3.55782624462725	3.55782624462725	3.55782624462725	3.55782624462725	3.55782624462725	3.55782624462725	3.55782624462725	3.55782624462725	1	1	1	1	1	1
ENSG00000237700.2	PRAMEF33	gene_type protein_coding	chr1;chr1;chr1;chr1	13303539;13305930;13306638;13308329	13303586;13306241;13307216;13308907	1518	3.55782624462725	3.55782624462725	3.55782624462725	3.55782624462725	3.55782624462725	3.55782624462725	3.55782624462725	3.55782624462725	3.55782624462725	3.55782624462725	3.55782624462725	3.55782624462725	1	1	1	1	1	1
ENSG00000204501.7	PRAMEF15	gene_type protein_coding	chr1;chr1;chr1;chr1	13315581;13318392;13319372;13321703	13315658;13318700;13319953;13322598	1865	3.55782624462725	3.55782624462725	3.55782624462725	3.55782624462725	3.55782624462725	3.55782624462725	3.55782624462725	3.55782624462725	3.55782624462725	3.55782624462725	3.55782624462725	3.55782624462725	1	1	1	1	1	1
ENSG00000228229.2	RP11-219C24.10	gene_type lincRNA	chr1;chr1	13324039;13324259	13324162;13324518	384	3.55782624462725	3.55782624462725	3.55782624462725	3.55782624462725	3.55782624462725	3.55782624462725	3.55782624462725	3.55782624462725	3.55782624462725	3.55782624462725	3.55782624462725	3.55782624462725	1	1	1	1	1	1
ENSG00000204481.7	PRAMEF14	gene_type protein_coding	chr1;chr1;chr1;chr1;chr1;chr1	13342034;13342366;13343562;13344038;13345028;13347057	13343086;13343086;13343840;13344616;13345339;13347134	2301	3.55782624462725	3.55782624462725	3.55782624462725	3.55782624462725	3.55782624462725	3.55782624462725	3.55782624462725	3.95050242154829	3.55782624462725	3.97475709050258	3.55782624462725	3.55782624462725	1	1	1	1.31282641920024	1.33508430584895	1
ENSG00000204480.7	PRAMEF19	gene_type protein_coding	chr1;chr1;chr1	13369067;13370649;13371614	13369640;13371227;13371693	1233	3.55782624462725	3.55782624462725	3.55782624462725	3.55782624462725	3.55782624462725	3.55782624462725	3.55782624462725	3.55782624462725	3.55782624462725	4.14543931115403	3.55782624462725	3.55782624462725	1	1	1	1	1.50275838144031	1
ENSG00000204479.4	PRAMEF17	gene_type protein_coding	chr1;chr1;chr1	13389632;13390341;13391944	13389944;13390919;13392629	1578	3.55782624462725	3.55782624462725	3.55782624462725	3.55782624462725	3.55782624462725	3.55782624462725	3.55782624462725	3.55782624462725	3.55782624462725	3.55782624462725	3.55782624462725	3.55782624462725	1	1	1	1	1	1
ENSG00000204478.9	PRAMEF20	gene_type protein_coding	chr1;chr1;chr1;chr1;chr1;chr1;chr1	13410450;13416351;13416351;13418122;13418122;13420697;13420697	13410544;13416641;13416641;13418700;13418700;13421328;13421328	1597	3.55782624462725	3.55782624462725	3.55782624462725	3.55782624462725	3.55782624462725	3.55782624462725	3.55782624462725	3.55782624462725	3.55782624462725	3.55782624462725	3.55782624462725	3.55782624462725	1	1	1	1	1	1
ENSG00000162494.5	LRRC38	gene_type protein_coding	chr1;chr1	13474977;13512963	13476099;13514048	2209	3.55782624462725	3.55782624462725	3.55782624462725	3.55782624462725	3.55782624462725	3.55782624462725	3.55782624462725	3.55782624462725	3.55782624462725	3.55782624462725	3.55782624462725	3.55782624462725	1	1	1	1	1	1
ENSG00000259961.1	RP4-597A16.2	gene_type antisense	chr1;chr1;chr1	13513220;13514291;13516170	13513341;13514544;13516270	477	3.55782624462725	3.55782624462725	3.55782624462725	3.55782624462725	3.55782624462725	3.55782624462725	3.55782624462725	3.55782624462725	3.55782624462725	3.97475709050258	3.55782624462725	3.55782624462725	1	1	1	1	1.33508430584895	1
ENSG00000215909.3	BRWD1P1	gene_type processed_pseudogene	chr1;chr1	13555001;13555613	13555289;13555694	371	3.55782624462725	3.55782624462725	3.55782624462725	3.55782624462725	3.55782624462725	3.55782624462725	3.55782624462725	3.55782624462725	3.55782624462725	3.55782624462725	3.55782624462725	3.55782624462725	1	1	1	1	1	1
ENSG00000162493.16	PDPN	gene_type protein_coding	chr1;chr1;chr1;chr1;chr1;chr1;chr1;chr1;chr1;chr1;chr1;chr1;chr1;chr1;chr1;chr1;chr1;chr1;chr1;chr1;chr1;chr1;chr1;chr1;chr1;chr1;chr1;chr1;chr1;chr1;chr1;chr1;chr1;chr1;chr1;chr1;chr1;chr1;chr1;chr1;chr1;chr1;chr1;chr1;chr1;chr1;chr1;chr1;chr1;chr1;chr1;chr1;chr1;chr1;chr1;chr1;chr1;chr1;chr1;chr1;chr1;chr1;chr1;chr1;chr1;chr1;chr1;chr1	13583465;13583757;13583762;13583831;13583832;13583833;13584093;13584267;13584270;13585461;13585472;13585480;13595827;13595827;13607173;13607173;13607173;13607173;13607173;13607173;13607173;13607173;13607173;13607173;13607173;13607173;13610387;13610387;13610387;13610387;13610387;13610387;13610387;13610387;13610387;13610387;13613687;13613687;13613687;13613687;13613687;13613687;13613687;13613687;136…	13584100;13584100;13584100;13584100;13584100;13584100;13584188;13584341;13584341;13585639;13585568;13585639;13595984;13595984;13607306;13607306;13607306;13607306;13607306;13607306;13607221;13607306;13607306;13607306;13607306;13607306;13610516;13610516;13610516;13610516;13610516;13610516;13610516;13610516;13610516;13610516;13613725;13613725;13613725;13613725;13613725;13613725;13613725;13613725;136…	3707	4.11398763489342	3.55782624462725	3.96520609223261	3.55782624462725	3.55782624462725	3.55782624462725	3.55782624462725	3.55782624462725	3.96574265195466	3.55782624462725	3.55782624462725	3.55782624462725	0.680109340014304	0.753991493562934	1	1	0.753711125063102	1
ENSG00000222952.1	RNA5SP41	gene_type rRNA	chr1	13623184	13623284	101	3.95230142254003	3.55782624462725	3.96520609223261	3.55782624462725	3.55782624462725	3.55782624462725	3.55782624462725	3.55782624462725	3.55782624462725	3.55782624462725	3.55782624462725	3.55782624462725	0.760766076973291	0.753991493562934	1	1	1	1
ENSG00000237445.2	CTA-520D8.2	gene_type lincRNA	chr1;chr1	13657311;13659577	13657355;13659910	379	3.55782624462725	3.55782624462725	3.55782624462725	3.55782624462725	3.55782624462725	3.55782624462725	3.55782624462725	3.55782624462725	3.55782624462725	3.55782624462725	3.55782624462725	3.55782624462725	1	1	1	1	1	1
ENSG00000253085.1	SCARNA11	gene_type scaRNA	chr1	13696070	13696199	130	3.55782624462725	3.55782624462725	3.55782624462725	3.55782624462725	3.55782624462725	3.55782624462725	3.55782624462725	3.55782624462725	3.55782624462725	3.55782624462725	3.55782624462725	3.55782624462725	1	1	1	1	1	1
ENSG00000116731.22	PRDM2	gene_type protein_coding	chr1;chr1;chr1;chr1;chr1;chr1;chr1;chr1;chr1;chr1;chr1;chr1;chr1;chr1;chr1;chr1;chr1;chr1;chr1;chr1;chr1;chr1;chr1;chr1;chr1;chr1;chr1;chr1;chr1;chr1;chr1;chr1;chr1;chr1;chr1;chr1;chr1;chr1;chr1;chr1;chr1;chr1;chr1;chr1;chr1;chr1;chr1;chr1;chr1;chr1;chr1;chr1;chr1;chr1;chr1;chr1;chr1;chr1;chr1;chr1;chr1;chr1;chr1;chr1;chr1;chr1;chr1;chr1;chr1;chr1;chr1;chr1;chr1;chr1;chr1	13700198;13700240;13704855;13704855;13715541;13715541;13715541;13715541;13731000;13731000;13731000;13731000;13731018;13732779;13732779;13732779;13732779;13738750;13738785;13742005;13742005;13742005;13742005;13742005;13742005;13742005;13749361;13749361;13749361;13749361;13749361;13749361;13749361;13749403;13749415;13749424;13749435;13749436;13749436;13769039;13769118;13769118;13769118;13769118;137…	13700300;13700300;13705645;13705645;13715614;13715614;13715614;13715614;13731117;13731117;13731117;13731117;13731117;13732882;13732882;13732882;13732855;13738940;13738940;13742157;13742157;13742157;13742157;13742157;13742157;13742157;13749487;13749487;13749487;13749487;13749487;13749487;13749463;13749487;13749487;13749487;13749487;13749487;13749487;13769173;13769173;13769173;13769173;13769173;137…	10923	8.94751635342214	9.28776900241941	9.21492571782023	9.21637789777539	9.39767835825851	9.45734622855864	9.30363559179252	9.21196767096226	9.17430329896512	9.06695807983725	8.47977915165959	8.65877945859812	1.26597827639678	1.00100708120766	1.04222579745354	0.938437180868616	0.928294696257742	1.13209914296879
ENSG00000189337.16	KAZN	gene_type protein_coding	chr1;chr1;chr1;chr1;chr1;chr1;chr1;chr1;chr1;chr1;chr1;chr1;chr1;chr1;chr1;chr1;chr1;chr1;chr1;chr1;chr1;chr1;chr1;chr1;chr1;chr1;chr1;chr1;chr1;chr1;chr1;chr1;chr1;chr1;chr1;chr1;chr1;chr1;chr1;chr1;chr1;chr1;chr1;chr1;chr1;chr1;chr1;chr1;chr1;chr1;chr1;chr1;chr1;chr1;chr1;chr1;chr1;chr1;chr1;chr1;chr1;chr1;chr1;chr1;chr1;chr1;chr1;chr1;chr1;chr1;chr1;chr1;chr1;chr1;chr1;chr1;chr1;chr1;chr1;chr1	13892792;13892792;14180435;14180435;14304590;14598704;14598704;14598717;14598983;14598983;14924130;14929800;14929800;14945919;14960684;14960684;14960684;14960684;14960684;14960684;14960684;14960684;15034749;15034749;15034749;15034749;15034749;15034749;15034749;15034749;15043989;15043989;15043989;15043989;15043989;15043989;15043989;15043989;15056091;15056091;15056091;15056091;15056091;15056091;150…	13893756;13893756;14180592;14180592;14304663;14599223;14599223;14598910;14599223;14599223;14924572;14930044;14930044;14946173;14960875;14960875;14960875;14960875;14960875;14960875;14960875;14960875;15034885;15034885;15034885;15034885;15034885;15034885;15034885;15034885;15044159;15044159;15044159;15044159;15044159;15044159;15044159;15044159;15056280;15056145;15056280;15056280;15056280;15056280;150…	13841	7.36938997760448	8.74428007919075	7.62039448172459	8.84222366601923	7.84479256871413	8.55889187687136	7.82755185026842	8.72627687144654	7.61681213051666	8.54606252607287	7.00883895214468	7.66528208832746	2.59348154130919	2.33242256340579	1.64045873976197	1.86441757953256	1.90428629809923	1.57619183862399
ENSG00000252151.1	RNU6-1265P	gene_type snRNA	chr1	14124233	14124335	103	3.55782624462725	3.55782624462725	3.55782624462725	3.55782624462725	3.55782624462725	3.55782624462725	3.55782624462725	3.55782624462725	3.55782624462725	3.55782624462725	3.55782624462725	3.55782624462725	1	1	1	1	1	1
ENSG00000231606.1	RP11-344F13.1	gene_type lincRNA	chr1;chr1	14221891;14223054	14222107;14223118	282	3.55782624462725	3.55782624462725	3.55782624462725	3.55782624462725	3.55782624462725	3.55782624462725	3.55782624462725	3.55782624462725	3.55782624462725	3.55782624462725	3.55782624462725	3.55782624462725	1	1	1	1	1	1
ENSG00000234593.2	RP4-704D23.1	gene_type lincRNA	chr1;chr1;chr1;chr1	14348955;14350869;14390686;14391459	14349378;14351025;14390751;14391575	764	3.55782624462725	3.55782624462725	3.55782624462725	3.55782624462725	3.55782624462725	3.55782624462725	3.55782624462725	3.55782624462725	3.55782624462725	3.97475709050258	3.55782624462725	3.55782624462725	1	1	1	1	1.33508430584895	1
ENSG00000235829.1	TBCAP2	gene_type processed_pseudogene	chr1;chr1	14692129;14692567	14692407;14692613	326	3.55782624462725	3.55782624462725	3.55782624462725	3.55782624462725	3.55782624462725	3.55782624462725	3.55782624462725	3.55782624462725	3.55782624462725	3.55782624462725	3.55782624462725	3.55782624462725	1	1	1	1	1	1
ENSG00000175147.11	TMEM51-AS1	gene_type antisense	chr1;chr1;chr1;chr1;chr1;chr1;chr1;chr1;chr1;chr1;chr1	15111815;15115952;15118327;15118327;15120577;15120972;15120972;15124228;15124228;15152291;15152291	15117807;15117807;15118904;15118904;15120697;15121059;15121059;15124373;15124373;15152402;15152464	7100	4.71377180991689	5.3133683560221	5.11592989685119	5.307776075999	4.89341836085845	5.10796161153328	5.16434554452006	5.49358184942399	5.24416739203629	5.27782626638846	4.56377988186717	4.98112808775494	1.51529275119541	1.14222445582477	1.16033650006397	1.2563481466777	1.02360484015986	1.33547059081755
ENSG00000171729.13	TMEM51	gene_type protein_coding	chr1;chr1;chr1;chr1;chr1;chr1;chr1;chr1;chr1;chr1;chr1;chr1;chr1;chr1;chr1;chr1;chr1;chr1;chr1;chr1;chr1	15152532;15152566;15152577;15153733;15153768;15153789;15210490;15210490;15210490;15214895;15214895;15214895;15214895;15214895;15214895;15219326;15219326;15219326;15219326;15219326;15219330	15152784;15152784;15152784;15153954;15153954;15153954;15210562;15210562;15210562;15215431;15215431;15215431;15215431;15215431;15215431;15220480;15220408;15220339;15219346;15220477;15220393	2240	8.0100540056263	8.42874048393247	8.18748961966845	8.42036256760337	7.93078826804055	8.30181263433204	7.933026307779	8.33299344307185	8.14337186258097	8.59866041857066	7.54494275056289	7.83888623430235	1.33670997446748	1.17517283134972	1.29327077430439	1.31947785262068	1.37105700509647	1.22598683219805
ENSG00000204464.7	C1orf195	gene_type lincRNA	chr1;chr1;chr1;chr1	15164344;15168474;15171181;15171181	15164461;15168777;15171317;15171317	559	3.55782624462725	3.95438272415751	3.96520609223261	3.55782624462725	3.55782624462725	3.55782624462725	3.97903344337653	3.55782624462725	3.55782624462725	3.55782624462725	3.55782624462725	3.55782624462725	1.3163621772543	0.753991493562934	1	0.746799466090436	1	1
ENSG00000215720.4	RP1-21O18.3	gene_type processed_pseudogene	chr1;chr1	15191828;15192750	15192441;15192845	710	3.55782624462725	3.55782624462725	3.55782624462725	3.55782624462725	3.55782624462725	3.55782624462725	3.55782624462725	3.55782624462725	3.96574265195466	3.55782624462725	3.55782624462725	3.55782624462725	1	1	1	1	0.753711125063102	1
ENSG00000278480.1	RP5-903E17.2	gene_type processed_pseudogene	chr1;chr1	15226373;15227455	15227243;15227549	966	4.11398763489342	3.55782624462725	3.55782624462725	3.55782624462725	4.30730794355666	3.9399101021215	4.1514250525846	3.95050242154829	3.55782624462725	3.97475709050258	3.55782624462725	3.9840131269933	0.680109340014304	1	0.775179411326523	0.869994007565042	1.33508430584895	1.34367747037693
ENSG00000142621.19	FHAD1	gene_type protein_coding	chr1;chr1;chr1;chr1;chr1;chr1;chr1;chr1;chr1;chr1;chr1;chr1;chr1;chr1;chr1;chr1;chr1;chr1;chr1;chr1;chr1;chr1;chr1;chr1;chr1;chr1;chr1;chr1;chr1;chr1;chr1;chr1;chr1;chr1;chr1;chr1;chr1;chr1;chr1;chr1;chr1;chr1;chr1;chr1;chr1;chr1;chr1;chr1;chr1;chr1;chr1;chr1;chr1;chr1;chr1;chr1;chr1;chr1;chr1;chr1;chr1;chr1;chr1;chr1;chr1;chr1;chr1;chr1;chr1;chr1;chr1;chr1;chr1;chr1;chr1;chr1;chr1;chr1;chr1;chr1…	15247272;15247280;15251771;15251771;15251785;15272323;15272323;15287045;15289399;15289399;15289399;15289399;15296684;15296684;15296684;15301205;15301205;15305761;15305762;15305769;15305780;15308613;15308613;15308613;15308613;15308613;15312105;15313057;15313057;15313057;15313057;15313057;15313057;15314442;15315047;15316378;15316378;15316378;15316378;15316378;15317824;15317824;15317824;15317824;153…	15247395;15247395;15251877;15251877;15251877;15272529;15272529;15287157;15289641;15289666;15289666;15289666;15296793;15296762;15296793;15301441;15301441;15305819;15305819;15305819;15305819;15308736;15308736;15308736;15308736;15308736;15312187;15313187;15313187;15313187;15313187;15313187;15313187;15314598;15315239;15316467;15316467;15316467;15316467;15316467;15317928;15317928;15317928;15317928;153…	12805	4.33963517379083	4.51461706795932	4.61539758452791	4.30835738787737	4.30730794355666	4.31549205937346	4.72160454055041	4.50552303053715	4.25976969624512	4.63926676564394	4.27619612797294	4.86525230716655	1.12895023638491	0.808298347525655	1.00568891758447	0.860900547430477	1.30088828032168	1.50426232689961
ENSG00000233485.1	RP3-467K16.2	gene_type antisense	chr1;chr1	15326680;15343776	15329683;15343876	3105	3.55782624462725	3.55782624462725	3.55782624462725	3.55782624462725	3.99376167689582	3.55782624462725	3.55782624462725	3.55782624462725	3.55782624462725	3.55782624462725	3.55782624462725	3.55782624462725	1	1	0.73921429838892	1	1	1
ENSG00000236045.1	RP3-467K16.7	gene_type antisense	chr1;chr1	15334166;15335272	15334699;15335464	727	3.55782624462725	3.55782624462725	3.55782624462725	3.55782624462725	3.55782624462725	3.55782624462725	3.55782624462725	3.55782624462725	3.55782624462725	4.27507766239493	3.55782624462725	3.55782624462725	1	1	1	1	1.64404685687777	1
ENSG00000228140.1	RP3-467K16.4	gene_type lincRNA	chr1;chr1;chr1	15402979;15409070;15409287	15407907;15409171;15409433	5178	3.95230142254003	3.95438272415751	3.55782624462725	3.55782624462725	3.55782624462725	4.09661836972613	3.97903344337653	3.95050242154829	3.55782624462725	4.14543931115403	3.97541602041241	3.55782624462725	1.00144368946577	1	1.45275570996825	0.980418068928156	1.50275838144031	0.748674345507322
ENSG00000142634.12	EFHD2	gene_type protein_coding	chr1;chr1;chr1;chr1;chr1;chr1;chr1;chr1;chr1	15409895;15410265;15425871;15425871;15427150;15427150;15427898;15428593;15428593	15410279;15410279;15426018;15426018;15427284;15427284;15428009;15429081;15430343	2531	9.37478344567939	9.70493862533517	9.56392607097549	9.7000650329379	9.64228779437964	9.7717781617724	9.63618685714897	9.97525773472037	10.1654344002319	10.134127231964	9.37328902505878	9.20856838602433	1.25714858909479	1.09896006551317	1.09390720983592	1.26494168562732	0.978533285936182	0.892101247634516
ENSG00000162438.11	CTRC	gene_type protein_coding	chr1;chr1;chr1;chr1;chr1;chr1;chr1;chr1;chr1;chr1;chr1;chr1;chr1;chr1;chr1;chr1;chr1;chr1;chr1;chr1;chr1;chr1	15438439;15438442;15438453;15440300;15440350;15440493;15440493;15442447;15442447;15442447;15442447;15443419;15443419;15443419;15443419;15444606;15445597;15445597;15445597;15446575;15446575;15446575	15438504;15438504;15438504;15440391;15440391;15440590;15440590;15442572;15442572;15442572;15442572;15443555;15443540;15443555;15443555;15444751;15445749;15445749;15445749;15446654;15449242;15446654	3486	3.55782624462725	3.55782624462725	4.13206609265227	3.55782624462725	3.99376167689582	3.9399101021215	3.55782624462725	3.55782624462725	3.55782624462725	4.14543931115403	3.55782624462725	3.9840131269933	1	0.67164004343305	0.963361000009112	1	1.50275838144031	1.34367747037693
ENSG00000142615.7	CELA2A	gene_type protein_coding	chr1;chr1;chr1;chr1;chr1;chr1;chr1;chr1;chr1;chr1;chr1;chr1;chr1;chr1	15456728;15456729;15456747;15457086;15457086;15457086;15461561;15461561;15462733;15462733;15463386;15465999;15467386;15471990	15456793;15456793;15456793;15457623;15457174;15457174;15461658;15461658;15463011;15462861;15463522;15466144;15467538;15472091	1519	3.55782624462725	3.55782624462725	3.55782624462725	3.55782624462725	3.55782624462725	3.55782624462725	3.55782624462725	3.55782624462725	3.55782624462725	4.27507766239493	3.55782624462725	3.55782624462725	1	1	1	1	1.64404685687777	1
ENSG00000215704.9	CELA2B	gene_type protein_coding	chr1;chr1;chr1;chr1;chr1;chr1;chr1;chr1;chr1;chr1;chr1;chr1;chr1;chr1;chr1;chr1;chr1;chr1;chr1;chr1;chr1	15465909;15467386;15476101;15476457;15476457;15476465;15481098;15481098;15481098;15481645;15482265;15482265;15482265;15483264;15483264;15485861;15485901;15487285;15487285;15491295;15491295	15466144;15467538;15476165;15476545;15476545;15476545;15481195;15481195;15481195;15481749;15482357;15482393;15482393;15483400;15483368;15486046;15486046;15487437;15487437;15491395;15491400	1457	3.95230142254003	3.55782624462725	3.55782624462725	3.55782624462725	3.55782624462725	3.55782624462725	4.1514250525846	4.11146652358321	4.13281753800557	3.97475709050258	3.97541602041241	3.9840131269933	0.760766076973291	1	1	0.972682907272541	0.896229147663079	1.00597685070739
ENSG00000132906.17	CASP9	gene_type protein_coding	chr1;chr1;chr1;chr1;chr1;chr1;chr1;chr1;chr1;chr1;chr1;chr1;chr1;chr1;chr1;chr1;chr1;chr1;chr1;chr1;chr1;chr1;chr1;chr1;chr1;chr1;chr1;chr1;chr1;chr1;chr1;chr1;chr1;chr1;chr1;chr1;chr1;chr1;chr1;chr1;chr1;chr1;chr1;chr1;chr1;chr1;chr1;chr1;chr1;chr1;chr1;chr1;chr1;chr1;chr1;chr1;chr1;chr1;chr1;chr1;chr1;chr1;chr1;chr1;chr1;chr1;chr1;chr1;chr1;chr1;chr1;chr1	15490832;15492270;15492270;15492366;15492798;15492855;15492943;15493892;15493892;15493892;15493892;15493892;15493892;15495273;15495273;15495273;15495273;15495273;15495273;15495273;15504611;15504611;15504611;15504611;15504611;15504611;15504611;15504625;15505990;15505990;15505990;15505990;15505990;15505990;15505990;15506899;15506899;15506899;15506899;15506899;15506899;15506899;15506899;15507772;155…	15494001;15493035;15493035;15493035;15493035;15493035;15493035;15494001;15494001;15494001;15494001;15494001;15494001;15495452;15495452;15495452;15495452;15495452;15495452;15495452;15504758;15504758;15504758;15504758;15504758;15504758;15504758;15504758;15506079;15506079;15506079;15506079;15506079;15506079;15506079;15507075;15507075;15507075;15507075;15507052;15507133;15507075;15507075;15507907;155…	5269	7.38484467753058	7.09008963131627	7.28488036702722	7.01077883035261	7.55073000440209	7.1434555042866	7.4958193894574	7.28628023747973	7.65815664332559	7.53317520893196	7.35571477335201	7.15646305822216	0.815210734489242	0.826965164702811	0.754046553023962	0.864813439309943	0.917015843928431	0.871002210222486
ENSG00000116138.12	DNAJC16	gene_type protein_coding	chr1;chr1;chr1;chr1;chr1;chr1;chr1;chr1;chr1;chr1;chr1;chr1;chr1;chr1;chr1;chr1;chr1;chr1;chr1;chr1;chr1;chr1;chr1;chr1;chr1;chr1;chr1;chr1;chr1;chr1;chr1;chr1;chr1;chr1;chr1;chr1;chr1;chr1;chr1;chr1;chr1;chr1;chr1;chr1;chr1;chr1;chr1;chr1;chr1;chr1;chr1;chr1;chr1;chr1;chr1;chr1;chr1;chr1;chr1;chr1;chr1;chr1;chr1;chr1;chr1;chr1;chr1;chr1;chr1;chr1;chr1;chr1;chr1;chr1;chr1;chr1;chr1;chr1;chr1;chr1…	15526813;15526813;15526813;15526813;15526813;15529088;15529088;15529088;15529088;15534237;15534237;15534237;15534237;15534237;15536475;15536475;15536475;15536475;15536475;15544399;15544399;15544399;15544399;15544399;15546767;15546767;15546767;15546767;15546767;15548270;15548270;15548270;15548270;15548270;15559526;15559526;15559526;15559526;15559526;15559608;15560131;15562142;15562142;15562142;155…	15526958;15526958;15526958;15526958;15526958;15529272;15529272;15529272;15529272;15534303;15534303;15534303;15534303;15534303;15536814;15536814;15536814;15536814;15536814;15544583;15544583;15544583;15544583;15544583;15546871;15546871;15546871;15546871;15546871;15548428;15548428;15548428;15548428;15548428;15559656;15559656;15559656;15559656;15559656;15559656;15560329;15562325;15562325;15562325;155…	8563	8.05408845614797	8.21466613315821	8.1543117263014	7.97256332127934	8.43471431413883	8.15370703171693	8.54684841531974	8.21843701399137	8.24618084157961	7.92392864421558	7.93398017098954	7.9878526433736	1.1177346063955	0.881633894707909	0.823016190855152	0.796412957451855	0.799820299611333	1.03804750785502
ENSG00000251866.1	SCARNA21	gene_type scaRNA	chr1	15542165	15542304	140	3.55782624462725	3.55782624462725	3.55782624462725	3.55782624462725	3.55782624462725	3.9399101021215	3.55782624462725	3.55782624462725	3.55782624462725	3.55782624462725	3.55782624462725	3.55782624462725	1	1	1.30322289775605	1	1	1
ENSG00000272510.1	RP4-680D5.8	gene_type antisense	chr1	15565611	15565956	346	4.2369208620727	3.55782624462725	3.55782624462725	3.55782624462725	3.55782624462725	3.55782624462725	3.55782624462725	3.95050242154829	3.55782624462725	3.55782624462725	3.55782624462725	3.55782624462725	0.624557100645793	1	1	1.31282641920024	1	1
ENSG00000116771.5	AGMAT	gene_type protein_coding	chr1;chr1;chr1;chr1;chr1;chr1;chr1	15572353;15574757;15577685;15578859;15580094;15583193;15584696	15573724;15574841;15577864;15579054;15580142;15583395;15585110	2500	7.9335241691521	7.77483455243811	7.89202959241284	7.99120571894733	7.97504514930528	8.08018245786976	7.67126363494973	7.74330749755379	8.32515309974113	8.30954607758949	7.83046070958824	7.71604685807897	0.895838381193602	1.07116158434117	1.0755967555549	1.05120486863613	0.989240340332785	0.923757545340041
ENSG00000237301.1	RP4-680D5.2	gene_type antisense	chr1;chr1	15586136;15603089	15588442;15603626	2845	4.33963517379083	4.43382827630526	4.25885812962813	4.42132383357474	4.51847424846376	4.40257149830365	4.4868859099821	4.42545549391194	4.61674007229362	4.89686259953378	4.47911443934651	4.15839371305164	1.06746820745766	1.11919832149129	0.922804695393598	0.958313490977932	1.21429800963062	0.800669787536813
ENSG00000235084.3	CHCHD2P6	gene_type processed_pseudogene	chr1	15604597	15605043	447	4.11398763489342	4.65626681633109	4.86796115633572	4.17289735623919	4.6064747281835	4.40257149830365	4.39158453445309	4.3361324333863	4.68643555104792	4.63926676564394	4.38456570337338	4.15839371305164	1.4562713303713	0.617682002296589	0.868198460872345	0.962292839657439	0.967833790368479	0.854900255219152
ENSG00000252417.1	RNU7-179P	gene_type snRNA	chr1	15608078	15608145	68	3.55782624462725	3.55782624462725	3.55782624462725	3.55782624462725	3.55782624462725	3.55782624462725	3.55782624462725	3.55782624462725	3.55782624462725	3.55782624462725	3.55782624462725	3.55782624462725	1	1	1	1	1	1
ENSG00000236500.1	CD24P1	gene_type processed_pseudogene	chr1	15614643	15614867	225	3.55782624462725	3.55782624462725	3.55782624462725	3.55782624462725	3.55782624462725	3.55782624462725	3.55782624462725	3.55782624462725	3.55782624462725	3.55782624462725	3.55782624462725	3.55782624462725	1	1	1	1	1	1
ENSG00000197312.11	DDI2	gene_type protein_coding	chr1;chr1;chr1;chr1;chr1;chr1;chr1;chr1;chr1;chr1;chr1;chr1;chr1;chr1;chr1;chr1;chr1;chr1;chr1;chr1;chr1;chr1;chr1;chr1;chr1;chr1;chr1;chr1;chr1;chr1	15617500;15617543;15617615;15626669;15626669;15626669;15630325;15630325;15630402;15630425;15633439;15633439;15633439;15633439;15633798;15638307;15643522;15643522;15643522;15649720;15649720;15649720;15651706;15651706;15651836;15656421;15656617;15656617;15659837;15659837	15617808;15617808;15617808;15627066;15626798;15626798;15630561;15630561;15630561;15630561;15633565;15634306;15633565;15633565;15633879;15638434;15643650;15643650;15643650;15649823;15649823;15649823;15651895;15651895;15651895;15656985;15656679;15656679;15661057;15669044	12136	9.26891902423988	8.98522415494948	9.04195313851863	8.72106606952798	9.16416426491702	8.92987478668062	9.14258337571222	8.73224970790135	8.59668666596427	8.50334401123842	8.28187882044879	8.41341196164184	0.821484426739507	0.800577475655744	0.850103568799043	0.752449326420215	0.937348440241273	1.09545721708507
ENSG00000215695.1	RSC1A1	gene_type protein_coding	chr1	15659869	15661722	1854	3.55782624462725	3.55782624462725	3.55782624462725	3.55782624462725	3.55782624462725	3.55782624462725	3.55782624462725	3.55782624462725	3.55782624462725	3.55782624462725	3.55782624462725	3.55782624462725	1	1	1	1	1	1
ENSG00000271742.1	RP4-680D5.9	gene_type lincRNA	chr1	15682873	15683128	256	3.55782624462725	3.55782624462725	3.55782624462725	3.55782624462725	3.55782624462725	3.55782624462725	3.55782624462725	3.95050242154829	3.55782624462725	3.55782624462725	3.55782624462725	3.55782624462725	1	1	1	1.31282641920024	1	1
ENSG00000116786.11	PLEKHM2	gene_type protein_coding	chr1;chr1;chr1;chr1;chr1;chr1;chr1;chr1;chr1;chr1;chr1;chr1;chr1;chr1;chr1;chr1;chr1;chr1;chr1;chr1;chr1;chr1;chr1;chr1;chr1;chr1;chr1;chr1;chr1;chr1;chr1;chr1;chr1;chr1;chr1;chr1;chr1;chr1;chr1;chr1;chr1;chr1;chr1;chr1;chr1;chr1;chr1;chr1;chr1;chr1;chr1	15684332;15684390;15684541;15716237;15716237;15716237;15716707;15716707;15717893;15717893;15717893;15718538;15718538;15718538;15719734;15719734;15719734;15721329;15725317;15725317;15727014;15727014;15728079;15728079;15728267;15728267;15728669;15728669;15729102;15729102;15729797;15729797;15729845;15730532;15730532;15730532;15731192;15731192;15731192;15731889;15731889;15731950;15732350;15732350;157…	15684618;15684618;15684618;15716343;15716343;15716343;15716816;15716816;15717992;15717992;15717992;15718625;15718625;15718625;15719869;15719920;15719920;15721388;15725545;15725545;15727832;15727832;15728148;15728148;15728357;15728357;15728733;15728733;15729190;15729190;15729929;15729929;15729929;15730722;15730722;15730722;15731257;15731257;15731257;15732048;15732048;15732048;15732529;15732529;157…	4122	9.60563867656662	10.0044112979013	9.80561070701279	9.9785987812607	9.98385917239904	10.0626552291377	10.0630925231488	10.2629226128675	10.2929874052765	10.2359889012147	9.6100280024932	9.59017361625875	1.31838581144179	1.12739109275229	1.05613631652108	1.14856307750431	0.961261925125914	0.986332251730537
ENSG00000237938.5	RP11-288I21.1	gene_type antisense	chr1;chr1;chr1;chr1;chr1;chr1;chr1;chr1;chr1;chr1;chr1;chr1	15720312;15720737;15720812;15722719;15723203;15723203;15723203;15725593;15732387;15732387;15732387;15736861	15720595;15720994;15720994;15723067;15723287;15723353;15723353;15725872;15732452;15732561;15732452;15736896	1533	4.33963517379083	4.11690410408451	4.68501284740425	4.30835738787737	4.42012488630275	4.31549205937346	4.1514250525846	4.3361324333863	4.54119739532673	4.56224313213017	4.27619612797294	4.29078246946898	0.856941680901342	0.770221094362995	0.930041612715896	1.13658641810945	1.01469471426411	1.01016176508884
ENSG00000162461.7	SLC25A34	gene_type protein_coding	chr1;chr1;chr1;chr1;chr1;chr1;chr1;chr1;chr1;chr1;chr1	15736405;15737783;15737929;15738093;15738093;15738594;15738594;15739035;15739224;15739224;15739224	15736863;15737994;15737994;15738245;15738245;15738728;15738728;15739097;15739335;15739562;15741396	3195	4.33963517379083	4.34368653389374	4.45715275953258	4.42132383357474	4.42012488630275	4.31549205937346	4.72160454055041	4.50552303053715	4.54119739532673	4.47769828427326	4.38456570337338	4.15839371305164	1.00281213548848	0.97547112553838	0.930041612715896	0.860900547430477	0.956940340311505	0.854900255219152
ENSG00000224459.1	RP11-169K16.4	gene_type antisense	chr1;chr1	15740051;15749430	15740222;15749896	639	3.55782624462725	3.55782624462725	3.55782624462725	3.55782624462725	3.55782624462725	3.55782624462725	3.55782624462725	3.55782624462725	3.55782624462725	3.55782624462725	3.55782624462725	3.55782624462725	1	1	1	1	1	1
ENSG00000162460.6	TMEM82	gene_type protein_coding	chr1;chr1;chr1;chr1;chr1;chr1;chr1;chr1;chr1	15742422;15742547;15742835;15743020;15743020;15744160;15744160;15746867;15747546	15742647;15742647;15742907;15743194;15743194;15744580;15744580;15747054;15747982	1520	3.55782624462725	3.95438272415751	3.55782624462725	3.55782624462725	3.55782624462725	3.55782624462725	3.55782624462725	3.55782624462725	3.55782624462725	4.14543931115403	3.55782624462725	3.55782624462725	1.3163621772543	1	1	1	1.50275838144031	1
ENSG00000162458.12	FBLIM1	gene_type protein_coding	chr1;chr1;chr1;chr1;chr1;chr1;chr1;chr1;chr1;chr1;chr1;chr1;chr1;chr1;chr1;chr1;chr1;chr1;chr1;chr1;chr1;chr1;chr1;chr1;chr1;chr1;chr1;chr1;chr1;chr1;chr1;chr1;chr1;chr1;chr1;chr1;chr1;chr1;chr1;chr1;chr1;chr1;chr1;chr1;chr1;chr1;chr1;chr1;chr1;chr1;chr1;chr1;chr1;chr1;chr1;chr1;chr1;chr1;chr1;chr1;chr1;chr1;chr1;chr1;chr1;chr1;chr1;chr1;chr1;chr1;chr1;chr1	15756607;15756617;15756641;15756644;15756659;15757946;15757947;15758174;15758174;15758174;15758174;15758174;15758174;15758174;15758419;15758784;15758793;15758797;15764493;15764493;15764493;15764493;15764496;15764496;15764496;15764496;15764496;15764496;15764496;15764499;15764953;15764964;15764964;15764964;15764964;15764964;15764964;15764964;15764964;15764964;15764964;15764964;15764964;15767376;157…	15756732;15756732;15756728;15756732;15756732;15758043;15758043;15758355;15758329;15758329;15758329;15758355;15758355;15758355;15758848;15758848;15758848;15758848;15764685;15764685;15764685;15764685;15764547;15764547;15764685;15764685;15764547;15764685;15764685;15764685;15765233;15765233;15765233;15765233;15765233;15765233;15765027;15765076;15765233;15765217;15765035;15765073;15765086;15767563;157…	4716	8.36875173030368	8.24483354907736	8.11543227782676	7.68242670448564	8.66029924389615	8.57156199318519	9.44011394225737	9.50483134764329	9.0273733007833	8.64226403083599	9.31819882972183	8.98502277939202	0.917691925395143	0.740717037506807	0.940345446322056	1.04588005309743	0.765721000522877	0.793787060146997
ENSG00000224321.1	RPL12P14	gene_type processed_pseudogene	chr1	15792796	15793285	490	3.55782624462725	3.55782624462725	3.55782624462725	3.55782624462725	3.55782624462725	4.09661836972613	3.97903344337653	3.95050242154829	3.55782624462725	3.97475709050258	3.55782624462725	3.55782624462725	1	1	1.45275570996825	0.980418068928156	1.33508430584895	1
ENSG00000233954.6	UQCRHL	gene_type protein_coding	chr1	15807169	15809348	2180	8.24764797078054	7.79830289107441	8.08052818939073	8.0096092826778	7.41933251995717	7.75821037929245	7.70671811315261	7.68276368607498	7.96295924839521	7.97035027248135	7.49794166590319	7.2679282919881	0.732375238769228	0.952031420282998	1.26477246034139	0.983533142110856	1.00513621285568	0.852626987801097
ENSG00000178715.8	RP11-169K16.8	gene_type processed_pseudogene	chr1	15828232	15828669	438	4.50974017200837	4.51461706795932	4.25885812962813	4.30835738787737	4.17203110618318	4.61768887839909	4.72160454055041	4.57853741794673	4.25976969624512	4.47769828427326	4.47911443934651	4.29078246946898	1.00338612669645	1.0349056584381	1.36193492598288	0.905591848613044	1.16306246968571	0.877619830553688
ENSG00000179743.4	FLJ37453	gene_type antisense	chr1;chr1	15834474;15848108	15836906;15848147	2473	7.36159945728439	7.45099972135304	7.16569851287359	6.85547913284718	7.38215324929829	7.64261366208604	7.43785410129997	7.46260323382991	7.58142270619905	7.21334176620124	7.02001868518994	6.70042851183147	1.06392781011402	0.806519108466754	1.19786092156509	1.01730277989494	0.774812460179627	0.801297469979394
ENSG00000065526.10	SPEN	gene_type protein_coding	chr1;chr1;chr1;chr1;chr1;chr1;chr1;chr1;chr1;chr1;chr1;chr1;chr1;chr1;chr1;chr1;chr1;chr1;chr1;chr1;chr1;chr1;chr1;chr1;chr1;chr1;chr1;chr1;chr1;chr1	15847864;15872816;15873502;15873502;15876202;15876202;15876202;15876576;15909321;15909321;15909324;15911101;15911101;15911101;15916128;15916128;15918926;15918926;15919404;15919404;15920870;15920870;15922249;15928091;15937163;15937812;15938583;15938718;15939296;15939296	15848150;15873136;15874395;15874395;15876711;15876678;15876678;15876678;15909481;15909481;15909481;15911301;15911301;15911301;15916279;15916279;15919051;15919051;15919517;15919517;15920906;15920983;15922349;15936266;15937645;15938006;15938876;15938876;15939544;15940460	13294	9.42214376856355	10.649699638933	9.88276287618325	10.3860589264429	10.4178684964644	10.5884774122621	10.3778947602642	10.4501989632478	10.0228712030787	9.76682451414892	9.35588813075905	9.84041498671058	2.34169936586909	1.41744823611978	1.12553343639921	1.05139458008642	0.837379387546928	1.39912693482483
ENSG00000270620.1	RP1-134O19.3	gene_type unprocessed_pseudogene	chr1	15917698	15917908	211	3.55782624462725	3.55782624462725	3.55782624462725	3.55782624462725	3.55782624462725	3.55782624462725	3.55782624462725	3.55782624462725	3.55782624462725	3.55782624462725	3.55782624462725	3.55782624462725	1	1	1	1	1	1
ENSG00000116809.11	ZBTB17	gene_type protein_coding	chr1;chr1;chr1;chr1;chr1;chr1;chr1;chr1;chr1;chr1;chr1;chr1;chr1;chr1;chr1;chr1;chr1;chr1;chr1;chr1;chr1;chr1;chr1;chr1;chr1;chr1;chr1;chr1;chr1;chr1;chr1;chr1;chr1;chr1;chr1;chr1;chr1;chr1;chr1;chr1;chr1;chr1;chr1;chr1;chr1;chr1;chr1;chr1;chr1;chr1;chr1;chr1;chr1;chr1;chr1;chr1;chr1;chr1;chr1;chr1;chr1;chr1;chr1;chr1;chr1;chr1;chr1;chr1;chr1;chr1;chr1;chr1;chr1;chr1;chr1;chr1;chr1;chr1;chr1;chr1…	15941869;15941869;15941869;15941871;15941871;15942331;15942331;15942331;15942331;15942331;15942407;15942529;15942529;15942529;15942529;15942529;15942756;15943064;15943064;15943064;15943064;15943064;15943064;15943240;15943257;15943399;15943399;15943399;15943399;15943429;15943599;15943599;15943599;15943599;15943599;15943599;15943599;15943599;15943808;15943808;15943808;15943808;15943808;15944300;159…	15942252;15942252;15942252;15942252;15942252;15942441;15942420;15942420;15942441;15942722;15942420;15942738;15942738;15942738;15942738;15942738;15942901;15943384;15943194;15943194;15943194;15943194;15943089;15943519;15943519;15943519;15943519;15943519;15943519;15943519;15943715;15943895;15943926;15943715;15943715;15943715;15943715;15943715;15943895;15944393;15943895;15943895;15943895;15944403;159…	4240	8.48402817138494	8.45477496771378	8.42055905135841	8.38324005078106	8.58896025835813	8.53644730599297	8.67738153657978	8.85227755132899	9.09647578697876	8.87630017356494	8.23975953200173	8.05691595198311	0.97992741572523	0.974464139062783	0.964255281230046	1.12888303527704	0.858460933111179	0.880964884984759
ENSG00000234607.2	RP11-5P18.1	gene_type processed_pseudogene	chr1	15969632	15970194	563	3.55782624462725	3.55782624462725	3.55782624462725	3.55782624462725	3.55782624462725	3.55782624462725	3.55782624462725	3.55782624462725	3.55782624462725	3.55782624462725	3.55782624462725	3.9840131269933	1	1	1	1	1	1.34367747037693
ENSG00000231353.1	RP11-5P18.3	gene_type unprocessed_pseudogene	chr1	15988182	15988441	260	3.55782624462725	3.55782624462725	3.55782624462725	3.55782624462725	3.55782624462725	3.55782624462725	3.55782624462725	3.55782624462725	3.55782624462725	3.55782624462725	3.55782624462725	3.55782624462725	1	1	1	1	1	1
ENSG00000275503.1	RP11-5P18.11	gene_type processed_pseudogene	chr1	15989140	15989375	236	3.55782624462725	3.55782624462725	3.55782624462725	3.55782624462725	3.55782624462725	3.55782624462725	3.55782624462725	3.55782624462725	3.55782624462725	3.55782624462725	3.55782624462725	3.55782624462725	1	1	1	1	1	1
ENSG00000224966.4	TBC1D3P6	gene_type unprocessed_pseudogene	chr1;chr1;chr1;chr1;chr1;chr1;chr1;chr1	15989871;15990671;15991151;15991678;15992163;15993296;15993561;15994682	15989991;15990765;15991216;15991777;15992310;15993476;15993741;15994751	962	3.55782624462725	3.55782624462725	3.55782624462725	3.55782624462725	3.55782624462725	3.55782624462725	3.55782624462725	3.55782624462725	3.55782624462725	3.97475709050258	3.55782624462725	3.55782624462725	1	1	1	1	1.33508430584895	1
ENSG00000183888.4	C1orf64	gene_type protein_coding	chr1;chr1	16004236;16005919	16004385;16008807	3039	3.95230142254003	3.55782624462725	4.25885812962813	3.55782624462725	4.30730794355666	3.55782624462725	3.55782624462725	3.55782624462725	3.96574265195466	3.97475709050258	3.55782624462725	3.55782624462725	0.760766076973291	0.615132077192249	0.59481721251312	1	1.0062678942155	1
ENSG00000233078.1	RP11-5P18.5	gene_type antisense	chr1;chr1	16006160;16006393	16006346;16006671	466	3.55782624462725	3.55782624462725	3.55782624462725	3.55782624462725	3.55782624462725	3.55782624462725	3.55782624462725	3.55782624462725	3.55782624462725	3.55782624462725	3.55782624462725	3.55782624462725	1	1	1	1	1	1
ENSG00000173641.17	HSPB7	gene_type protein_coding	chr1;chr1;chr1;chr1;chr1;chr1;chr1;chr1;chr1;chr1;chr1;chr1;chr1;chr1;chr1;chr1;chr1;chr1;chr1;chr1;chr1	16014028;16014028;16014028;16014028;16015374;16015374;16015499;16017074;16017074;16017074;16017074;16017074;16017089;16017089;16017765;16017765;16017765;16017765;16017765;16017765;16019134	16015759;16015759;16015759;16015759;16015759;16015759;16015759;16017219;16017222;16017207;16017207;16018043;16017222;16017207;16018073;16018005;16017825;16017852;16018790;16018041;16019594	3910	3.55782624462725	3.55782624462725	3.55782624462725	3.55782624462725	3.55782624462725	3.55782624462725	3.55782624462725	3.55782624462725	4.13281753800557	4.47769828427326	3.55782624462725	3.55782624462725	1	1	1	1	1.27004599570453	1
ENSG00000186510.11	CLCNKA	gene_type protein_coding	chr1;chr1;chr1;chr1;chr1;chr1;chr1;chr1;chr1;chr1;chr1;chr1;chr1;chr1;chr1;chr1;chr1;chr1;chr1;chr1;chr1;chr1;chr1;chr1;chr1;chr1;chr1;chr1;chr1;chr1;chr1;chr1;chr1;chr1;chr1;chr1;chr1;chr1;chr1;chr1;chr1;chr1;chr1;chr1;chr1;chr1;chr1;chr1;chr1;chr1;chr1;chr1;chr1;chr1;chr1;chr1;chr1;chr1;chr1;chr1;chr1;chr1;chr1;chr1;chr1;chr1;chr1;chr1;chr1;chr1;chr1;chr1;chr1;chr1;chr1;chr1;chr1;chr1;chr1;chr1…	16018875;16020036;16021030;16021031;16021297;16021297;16021620;16021871;16021913;16021991;16021991;16022014;16022052;16022613;16022613;16022613;16022613;16022613;16023800;16023800;16023800;16023800;16023800;16024763;16024763;16024763;16024859;16026108;16026108;16026108;16026108;16026108;16026536;16026536;16026536;16026536;16026536;16026697;16026697;16026697;16026697;16026839;16027310;16027310;160…	16018974;16020233;16021094;16021094;16021513;16021513;16021737;16021918;16022063;16022063;16022063;16022063;16022063;16022719;16022719;16022719;16022719;16022719;16023928;16023928;16023928;16023928;16023928;16024891;16024891;16024891;16024891;16026247;16026247;16026257;16026247;16026247;16026613;16026596;16026613;16026613;16026613;16026775;16026775;16026775;16026775;16026909;16027435;16027435;160…	3476	3.55782624462725	3.55782624462725	3.55782624462725	3.55782624462725	3.99376167689582	3.55782624462725	3.97903344337653	3.55782624462725	3.55782624462725	3.97475709050258	3.55782624462725	3.55782624462725	1	1	0.73921429838892	0.746799466090436	1.33508430584895	1
ENSG00000232456.1	RP11-5P18.10	gene_type unprocessed_pseudogene	chr1;chr1;chr1;chr1;chr1	16035178;16036236;16036612;16039603;16039994	16035458;16036346;16036793;16039696;16040029	704	4.2369208620727	4.77901403647871	4.13206609265227	3.55782624462725	3.55782624462725	4.31549205937346	4.39158453445309	4.57853741794673	4.25976969624512	4.47769828427326	4.38456570337338	4.29078246946898	1.45608358504855	0.67164004343305	1.6907528841262	1.13835685124301	1.16306246968571	0.937062230653034
ENSG00000184908.17	CLCNKB	gene_type protein_coding	chr1;chr1;chr1;chr1;chr1;chr1;chr1;chr1;chr1;chr1;chr1;chr1;chr1;chr1;chr1;chr1;chr1;chr1;chr1;chr1;chr1;chr1;chr1;chr1;chr1;chr1;chr1;chr1;chr1;chr1;chr1;chr1;chr1;chr1;chr1;chr1;chr1;chr1;chr1;chr1;chr1;chr1;chr1;chr1;chr1;chr1;chr1;chr1;chr1;chr1;chr1;chr1	16043736;16043777;16044486;16044486;16045558;16045558;16046535;16046535;16047905;16047905;16048343;16048343;16048504;16048504;16048789;16049120;16049618;16049618;16049815;16049815;16050516;16050516;16050516;16050875;16050875;16050875;16051478;16051478;16051478;16051710;16051710;16051710;16052198;16052198;16052198;16052323;16053639;16053639;16053639;16053639;16055435;16055435;16055435;16055675;160…	16043880;16043880;16044592;16044592;16045686;16045686;16046663;16046663;16048044;16048044;16048420;16048420;16048582;16048514;16049245;16049245;16049702;16049702;16049916;16049916;16050600;16050600;16050600;16051048;16051048;16051048;16051547;16051547;16051547;16051820;16051820;16051820;16052411;16052411;16052411;16052411;16053772;16053772;16053772;16053690;16055523;16055523;16055523;16055758;160…	2939	3.55782624462725	3.55782624462725	3.55782624462725	3.55782624462725	3.99376167689582	3.55782624462725	4.28233509801111	3.55782624462725	3.55782624462725	4.27507766239493	3.55782624462725	3.9840131269933	1	1	0.73921429838892	0.60520304298605	1.64404685687777	1.34367747037693
ENSG00000185519.8	FAM131C	gene_type protein_coding	chr1;chr1;chr1;chr1;chr1;chr1;chr1;chr1;chr1;chr1;chr1;chr1;chr1	16057769;16058279;16059494;16059494;16059869;16059869;16062099;16062099;16062499;16062499;16063521;16073421;16073421	16058717;16058717;16059604;16059604;16060051;16060051;16062192;16062192;16062534;16062534;16063636;16073632;16073626	1701	5.64432382019838	6.14651011178443	5.39200166112233	5.77348802650204	5.93972324240444	6.22640014306263	5.9482617347171	6.68603206627615	6.31513609058968	6.28970651343388	5.90664431611075	5.63663897880059	1.41635831719803	1.30268327977515	1.21982729277247	1.66759659509183	0.982527997257458	0.829316477718048
ENSG00000142627.12	EPHA2	gene_type protein_coding	chr1;chr1;chr1;chr1;chr1;chr1;chr1;chr1;chr1;chr1;chr1;chr1;chr1;chr1;chr1;chr1;chr1;chr1;chr1;chr1;chr1;chr1;chr1;chr1;chr1;chr1;chr1	16124337;16129434;16130226;16131721;16132064;16132378;16133013;16133180;16133481;16133481;16133860;16134468;16134560;16135036;16135036;16135655;16135655;16137853;16137853;16138275;16138275;16146423;16148378;16148378;16150896;16155848;16155848	16125320;16129589;16130419;16131870;16132273;16132439;16133368;16133368;16133562;16133606;16133915;16134567;16134567;16135189;16135189;16135770;16135770;16138185;16138185;16138430;16138430;16146450;16149047;16149047;16150963;16156052;16156087	4159	9.00091206397956	9.2394154354225	9.26234760396829	9.13782390682497	9.4962290379829	9.52400419738903	9.84093176573819	9.83113274473898	10.0281194228311	9.68931867084879	8.75349652997257	8.65136365536248	1.17976815395024	0.917306840220366	1.01943879350374	0.993230850830735	0.790698310985267	0.931654618415009
ENSG00000227959.1	RP11-276H7.2	gene_type antisense	chr1;chr1	16155211;16156971	16155755;16157329	904	4.50974017200837	4.77901403647871	4.68501284740425	4.30835738787737	4.95403865708526	4.98326642299408	4.85082485685873	4.82325282634	4.86958772347916	4.89686259953378	4.27619612797294	4.29078246946898	1.20520107465573	0.770221094362995	1.02046575286612	0.981069991157301	1.01908534400523	1.01016176508884
ENSG00000224621.1	RP11-276H7.3	gene_type antisense	chr1;chr1	16159266;16161501	16159426;16161883	544	3.95230142254003	4.11690410408451	3.96520609223261	4.17289735623919	4.17203110618318	4.09661836972613	4.28233509801111	3.95050242154829	3.96574265195466	4.38328681413529	4.14636171533227	3.55782624462725	1.12085735121679	1.15483862323957	0.949070565251434	0.794526543812463	1.33565199550258	0.665017646772281
ENSG00000234166.1	ARHGEF19-AS1	gene_type antisense	chr1;chr1	16197854;16198282	16198216;16198357	439	3.55782624462725	3.55782624462725	3.55782624462725	3.55782624462725	3.55782624462725	3.55782624462725	3.55782624462725	3.55782624462725	3.55782624462725	3.55782624462725	3.55782624462725	3.55782624462725	1	1	1	1	1	1
ENSG00000142632.16	ARHGEF19	gene_type protein_coding	chr1;chr1;chr1;chr1;chr1;chr1;chr1;chr1;chr1;chr1;chr1;chr1;chr1;chr1;chr1;chr1;chr1;chr1;chr1;chr1;chr1;chr1;chr1;chr1;chr1;chr1;chr1;chr1;chr1;chr1;chr1;chr1;chr1;chr1;chr1;chr1;chr1;chr1;chr1;chr1;chr1;chr1;chr1	16197854;16198104;16199150;16199150;16201782;16201782;16202416;16202416;16204759;16204759;16204811;16204900;16205087;16205087;16205087;16205087;16205351;16205351;16205351;16205351;16205538;16205538;16205538;16205627;16205849;16205931;16205931;16205931;16205931;16206180;16206180;16206180;16206180;16206180;16206180;16206948;16206948;16206948;16207522;16207675;16207944;16208643;16212502	16198744;16198744;16199254;16199254;16201861;16201861;16202574;16202540;16204919;16204919;16204919;16204919;16205176;16205176;16205176;16205176;16205425;16205425;16205425;16205425;16205667;16205667;16205667;16206083;16206083;16206083;16206083;16206083;16206083;16206526;16206340;16206526;16206543;16206340;16206340;16206982;16207210;16207011;16207598;16207777;16208225;16209083;16212609	3745	8.43680536524212	8.83765224798798	8.16862466562049	8.50918450027916	9.04784036931569	9.1336318245524	9.04097969523092	9.13743667211498	9.31409334758596	9.04276720440548	8.61766291630597	8.59449345847491	1.32028270828741	1.26624786336303	1.06126978896308	1.0691445915249	0.828557575258966	0.984068427337343
ENSG00000237276.8	ANO7L1	gene_type transcribed_unprocessed_pseudogene	chr1;chr1;chr1;chr1;chr1;chr1;chr1;chr1;chr1;chr1;chr1;chr1;chr1;chr1;chr1;chr1;chr1;chr1;chr1;chr1;chr1;chr1	16215909;16216457;16216469;16216469;16217127;16217127;16217127;16217700;16218128;16218378;16218581;16219068;16219406;16220214;16220823;16221057;16225187;16225590;16225807;16225950;16226245;16227922	16216061;16216609;16216609;16216609;16217223;16217328;16217160;16217817;16218268;16218503;16218617;16219162;16219426;16220280;16220887;16221119;16225489;16225654;16225862;16226069;16226343;16228027	1990	5.19362146911429	5.20147618249527	5.15954385760199	5.12005160275531	5.26137129480318	5.06791939041892	5.11783498966142	5.18682391094459	5.35835429668978	5.49977873281882	4.84032743934117	4.73474544680533	1.00545932050859	0.972997325903103	0.87451079351778	1.04898127222661	1.10299361242831	0.929429928915788
ENSG00000132881.11	RSG1	gene_type protein_coding	chr1;chr1;chr1;chr1;chr1;chr1;chr1;chr1;chr1	16231700;16232281;16232510;16232510;16232893;16233612;16233612;16236631;16236631	16232297;16232297;16232646;16232646;16233017;16233764;16233764;16237162;16236659	1545	6.22606240728066	6.69619857629882	6.50831009581039	6.60135298877501	6.61440037462118	6.32152417031301	6.53646616295147	6.88340007783409	6.74901929371198	6.48136381989702	6.51708066517037	6.64100205034477	1.38524020807481	1.06661749211166	0.816273086424964	1.27185474592416	0.830668370122053	1.0896927314463
ENSG00000233929.1	MT1XP1	gene_type processed_pseudogene	chr1	16241213	16241398	186	3.55782624462725	4.24046069271801	4.25885812962813	3.55782624462725	3.55782624462725	3.9399101021215	3.97903344337653	3.55782624462725	3.55782624462725	4.14543931115403	3.55782624462725	3.9840131269933	1.60506803171848	0.615132077192249	1.30322289775605	0.746799466090436	1.50275838144031	1.34367747037693
ENSG00000037637.10	FBXO42	gene_type protein_coding	chr1;chr1;chr1;chr1;chr1;chr1;chr1;chr1;chr1;chr1;chr1;chr1;chr1;chr1;chr1;chr1;chr1;chr1;chr1;chr1	16246839;16251082;16251082;16252288;16252288;16252288;16253096;16253096;16253096;16253556;16253635;16255711;16256606;16292314;16294783;16305803;16305803;16315169;16315169;16352255	16251785;16251785;16251785;16252404;16252404;16252404;16253181;16253427;16253152;16253593;16253731;16255821;16256759;16294917;16294917;16305919;16305919;16315367;16315435;16352454	8984	8.87854267796677	8.90660892357699	8.94838492032343	8.93807772302642	8.96263629416237	9.02041764861822	8.77723816422119	9.08240543932765	9.07380776102737	8.91827736282867	8.53110675000768	8.53124943861522	1.01964450191663	0.992881055844018	1.04086383912793	1.23556188761236	0.897802240580764	1.0000989090972
ENSG00000055070.16	SZRD1	gene_type protein_coding	chr1;chr1;chr1;chr1;chr1;chr1;chr1;chr1;chr1;chr1;chr1;chr1;chr1;chr1;chr1;chr1;chr1;chr1;chr1;chr1;chr1;chr1;chr1;chr1;chr1;chr1;chr1;chr1;chr1;chr1;chr1;chr1;chr1;chr1;chr1;chr1;chr1;chr1;chr1;chr1	16352575;16353300;16367083;16367088;16367225;16367235;16367243;16367243;16367247;16367265;16367711;16387055;16387055;16387502;16390550;16391375;16391375;16391375;16391375;16391375;16391375;16391375;16393228;16393228;16393228;16393228;16393228;16393228;16393231;16393231;16393231;16393231;16395038;16395038;16395038;16395038;16395038;16395038;16395038;16395038	16352812;16353423;16367308;16367308;16367308;16367308;16367308;16367308;16367308;16367308;16368015;16387125;16387125;16387794;16390626;16391424;16391424;16391424;16391424;16391424;16391424;16391424;16393482;16393482;16393385;16393482;16393482;16393355;16393482;16393482;16393482;16393482;16395273;16395390;16398142;16395172;16395139;16395406;16398145;16398142	4747	11.5732864041525	11.4754925164952	11.6269322566296	11.6664824798201	11.5992983725369	11.7017775535894	11.4108689110674	11.6968694679861	11.793651341569	11.7783657746997	11.5522782501349	11.3637411879827	0.93446084020636	1.02779335027784	1.07361682148694	1.21925556474132	0.989460783291142	0.877495077747995
ENSG00000226457.1	RP11-430L17.1	gene_type processed_pseudogene	chr1	16369150	16369530	381	3.95230142254003	4.11690410408451	3.96520609223261	3.99438106532615	4.30730794355666	3.55782624462725	4.39158453445309	4.11146652358321	3.55782624462725	3.97475709050258	3.97541602041241	3.9840131269933	1.12085735121679	1.02042841145107	0.59481721251312	0.823523651182161	1.33508430584895	1.00597685070739
ENSG00000187144.11	SPATA21	gene_type protein_coding	chr1;chr1;chr1;chr1;chr1;chr1;chr1;chr1;chr1;chr1;chr1;chr1;chr1;chr1;chr1;chr1;chr1;chr1;chr1;chr1;chr1;chr1;chr1;chr1;chr1;chr1;chr1;chr1;chr1;chr1;chr1;chr1;chr1;chr1;chr1;chr1;chr1;chr1;chr1;chr1;chr1;chr1;chr1;chr1;chr1;chr1;chr1;chr1;chr1;chr1;chr1;chr1;chr1;chr1;chr1	16387117;16395681;16396558;16398643;16398667;16399344;16399344;16399344;16399344;16400482;16400720;16400720;16400720;16400720;16403727;16403727;16403727;16403727;16403968;16403968;16403968;16403968;16404967;16404967;16404967;16408498;16409118;16409118;16409118;16409601;16409601;16409601;16410778;16410778;16421509;16421911;16421911;16424904;16425097;16425524;16425524;16425524;16425524;16427864;164…	16387301;16396312;16396746;16398822;16398822;16399521;16399521;16399521;16399521;16400635;16400892;16400892;16400892;16400892;16403844;16403844;16403844;16403844;16404039;16404039;16404039;16403974;16405104;16405104;16405104;16408705;16409203;16409203;16409203;16410043;16410043;16410043;16410915;16410915;16421557;16421971;16422194;16425210;16425210;16425731;16425731;16425731;16425731;16428015;164…	4506	4.11398763489342	3.95438272415751	3.55782624462725	3.55782624462725	3.55782624462725	3.9399101021215	3.55782624462725	3.55782624462725	3.55782624462725	4.27507766239493	3.55782624462725	3.55782624462725	0.895270211592215	1	1.30322289775605	1	1.64404685687777	1
ENSG00000157191.19	NECAP2	gene_type protein_coding	chr1;chr1;chr1;chr1;chr1;chr1;chr1;chr1;chr1;chr1;chr1;chr1;chr1;chr1;chr1;chr1;chr1;chr1;chr1;chr1;chr1;chr1;chr1;chr1;chr1;chr1;chr1;chr1;chr1;chr1;chr1;chr1;chr1;chr1;chr1;chr1;chr1;chr1;chr1;chr1;chr1;chr1;chr1;chr1;chr1;chr1;chr1;chr1;chr1;chr1;chr1;chr1;chr1;chr1;chr1;chr1;chr1;chr1;chr1;chr1;chr1;chr1;chr1;chr1;chr1;chr1;chr1;chr1;chr1;chr1;chr1;chr1;chr1;chr1;chr1	16440672;16440721;16440724;16440736;16440736;16440737;16440742;16440743;16440756;16440758;16440772;16441166;16443632;16443632;16443632;16443632;16443632;16443632;16443632;16443632;16443632;16447870;16447870;16447870;16447870;16447870;16447870;16447870;16447870;16447870;16448060;16448060;16448060;16448060;16448060;16448060;16448060;16448249;16449093;16449093;16449093;16449093;16449093;16449093;164…	16440853;16440853;16440775;16440853;16440853;16440853;16440853;16440853;16440853;16440853;16440853;16441619;16443732;16443732;16443732;16443732;16443732;16443732;16443732;16443732;16443732;16447974;16447974;16447974;16447942;16447974;16447974;16447974;16447974;16447974;16448141;16448141;16448141;16448141;16448141;16448141;16448141;16448350;16449201;16452015;16449201;16449201;16449201;16449201;164…	5559	9.37863005014499	9.23298717351231	9.28001053733076	8.96970582028743	9.40922255443113	9.28738787600497	9.4671624334179	9.58618804611385	9.51439407407896	9.35364850412369	9.17917735274918	8.79624285865265	0.903976468538448	0.806471403375013	0.919018189745689	1.08600113632895	0.894562650676278	0.766876149235749
ENSG00000226029.1	LINC01772	gene_type lincRNA	chr1;chr1	16460948;16467577	16463287;16468481	3245	4.58305459595839	4.51461706795932	4.68501284740425	4.30835738787737	4.8290842810492	4.67900310144742	4.78830407589882	4.64593913043284	4.45830789965566	4.71030396550859	4.77825682765974	4.58380936888272	0.953670285860552	0.770221094362995	0.901199751203915	0.906032718405996	1.19085360197071	0.873907531766085
ENSG00000080947.14	CROCCP3	gene_type transcribed_unprocessed_pseudogene	chr1;chr1;chr1;chr1;chr1;chr1;chr1;chr1;chr1;chr1;chr1;chr1;chr1;chr1;chr1;chr1;chr1;chr1;chr1;chr1;chr1;chr1;chr1;chr1;chr1;chr1;chr1;chr1;chr1;chr1;chr1;chr1;chr1;chr1;chr1;chr1;chr1;chr1;chr1;chr1;chr1;chr1;chr1;chr1;chr1;chr1;chr1;chr1;chr1;chr1	16467436;16468922;16475825;16475825;16475916;16476399;16476399;16476399;16476930;16476930;16476930;16476930;16478255;16478255;16478255;16483287;16483287;16483287;16483287;16484233;16484233;16484233;16484823;16484823;16485569;16485569;16485569;16486426;16486426;16489684;16489685;16490618;16490618;16490618;16490634;16490646;16490865;16490865;16490865;16490865;16490865;16491010;16491010;16491010;164…	16470127;16469007;16476062;16476062;16476055;16476504;16476504;16476504;16477074;16478437;16477074;16477074;16478437;16478437;16478437;16483341;16483486;16483486;16483486;16484464;16484464;16484464;16484906;16484906;16485665;16485665;16485665;16486661;16486661;16489792;16489791;16490783;16490783;16490783;16490783;16490783;16490926;16490926;16490926;16490926;16490926;16491316;16491094;16491082;164…	6813	4.93201948086083	5.34846533069821	5.35623759786585	5.16987193694866	4.95403865708526	5.44752323054283	5.70702714667244	5.18682391094459	5.07242701478558	4.89686259953378	4.77825682765974	4.80211492462791	1.33463556113539	0.87881679056043	1.40784116263252	0.697273599740155	0.885421054394434	1.01667466857222
ENSG00000206652.1	RNU1-1	gene_type snRNA	chr1	16514122	16514285	164	3.55782624462725	3.55782624462725	3.55782624462725	3.99438106532615	3.55782624462725	4.09661836972613	3.55782624462725	3.55782624462725	3.55782624462725	3.97475709050258	3.55782624462725	3.55782624462725	1	1.35336859919879	1.45275570996825	1	1.33508430584895	1
ENSG00000261135.1	RP4-798A10.7	gene_type lincRNA	chr1	16514645	16515754	1110	4.58305459595839	4.24046069271801	4.53994339918289	4.30835738787737	4.68658471014338	4.40257149830365	4.6499347801402	4.7676517037665	3.96574265195466	3.97475709050258	4.56377988186717	4.40124077151475	0.788622127977351	0.851698071788779	0.821303179428882	1.08501645601961	1.0062678942155	0.893451232591932
ENSG00000224174.2	RP4-798A10.4	gene_type lincRNA	chr1;chr1	16520694;16521564	16520787;16521796	327	3.55782624462725	3.95438272415751	3.55782624462725	3.55782624462725	3.99376167689582	3.9399101021215	3.55782624462725	3.55782624462725	3.96574265195466	3.55782624462725	3.55782624462725	3.55782624462725	1.3163621772543	1	0.963361000009112	1	0.753711125063102	1
ENSG00000233421.4	LINC01783	gene_type lincRNA	chr1;chr1;chr1;chr1	16533886;16534426;16535342;16535780	16534209;16535649;16535776;16536172	2068	3.55782624462725	3.95438272415751	3.96520609223261	3.99438106532615	3.55782624462725	3.9399101021215	3.97903344337653	3.55782624462725	3.55782624462725	4.14543931115403	3.55782624462725	3.9840131269933	1.3163621772543	1.02042841145107	1.30322289775605	0.746799466090436	1.50275838144031	1.34367747037693
ENSG00000277344.1	RNU1-6P	gene_type snRNA	chr1	16534081	16534224	144	3.55782624462725	3.55782624462725	3.55782624462725	3.55782624462725	3.55782624462725	3.55782624462725	3.55782624462725	3.55782624462725	3.55782624462725	3.55782624462725	3.55782624462725	3.55782624462725	1	1	1	1	1	1
ENSG00000268991.2	FAM231B	gene_type protein_coding	chr1	16539066	16539575	510	3.55782624462725	3.95438272415751	3.55782624462725	3.55782624462725	3.55782624462725	3.55782624462725	3.55782624462725	3.55782624462725	3.55782624462725	3.55782624462725	3.55782624462725	3.55782624462725	1.3163621772543	1	1	1	1	1
ENSG00000225710.1	RP5-875O13.6	gene_type unprocessed_pseudogene	chr1;chr1;chr1	16548651;16550701;16552415	16548886;16551229;16552531	882	3.55782624462725	3.55782624462725	3.55782624462725	3.55782624462725	3.55782624462725	3.55782624462725	3.55782624462725	3.55782624462725	3.55782624462725	3.55782624462725	3.55782624462725	3.55782624462725	1	1	1	1	1	1
ENSG00000219481.10	NBPF1	gene_type protein_coding	chr1;chr1;chr1;chr1;chr1;chr1;chr1;chr1;chr1;chr1;chr1;chr1;chr1;chr1;chr1;chr1;chr1;chr1;chr1;chr1;chr1;chr1;chr1;chr1;chr1;chr1;chr1;chr1;chr1;chr1;chr1;chr1;chr1;chr1;chr1;chr1;chr1;chr1;chr1;chr1;chr1;chr1;chr1;chr1;chr1;chr1;chr1;chr1;chr1;chr1;chr1;chr1;chr1;chr1;chr1;chr1;chr1;chr1;chr1;chr1;chr1;chr1;chr1;chr1;chr1;chr1;chr1;chr1;chr1;chr1;chr1;chr1;chr1;chr1;chr1;chr1;chr1;chr1;chr1;chr1…	16562319;16564018;16564807;16564807;16564853;16565633;16565633;16565637;16566408;16566408;16566408;16567179;16567179;16567179;16567979;16567979;16567979;16569073;16569073;16569073;16573142;16573142;16573142;16574487;16574487;16574487;16575157;16575157;16575157;16576267;16576267;16576267;16577317;16577317;16577317;16579193;16579193;16579193;16580745;16580745;16580745;16581420;16581420;16581420;165…	16564186;16564186;16564865;16564918;16564918;16565805;16565805;16565805;16566459;16566459;16566459;16567351;16567351;16567351;16568030;16568030;16568030;16569236;16569236;16569236;16573193;16573193;16573193;16574692;16574692;16574692;16575229;16575229;16575229;16576481;16576481;16576481;16577419;16577419;16577419;16579402;16579402;16579402;16580956;16580956;16580956;16581492;16581492;16581492;165…	12212	8.76258799015846	9.69717744742381	8.91767723203102	9.79312975875923	9.40230713429106	9.83745946674779	8.76386953876322	9.24783623361285	8.56089355082797	9.26349849891514	8.44725851600497	8.96423086372066	1.91134665248974	1.83458344560254	1.35205358722461	1.39858379553988	1.62744066847523	1.43094909261155
ENSG00000271732.1	RP5-1182A14.5	gene_type lincRNA	chr1	16617391	16617729	339	3.95230142254003	4.51461706795932	4.13206609265227	4.17289735623919	4.42012488630275	4.40257149830365	3.97903344337653	4.3361324333863	4.13281753800557	4.71030396550859	4.14636171533227	4.29078246946898	1.47663744197739	1.0287063842134	0.98790663824684	1.28084774322946	1.49224707663845	1.10528678865954
ENSG00000215908.10	CROCCP2	gene_type transcribed_unprocessed_pseudogene	chr1;chr1;chr1;chr1;chr1;chr1;chr1;chr1;chr1;chr1;chr1;chr1;chr1;chr1;chr1;chr1;chr1;chr1;chr1;chr1;chr1;chr1;chr1;chr1;chr1;chr1;chr1;chr1;chr1;chr1;chr1;chr1;chr1;chr1;chr1;chr1;chr1;chr1;chr1;chr1;chr1;chr1;chr1;chr1;chr1;chr1;chr1;chr1;chr1;chr1;chr1;chr1;chr1;chr1;chr1;chr1;chr1;chr1;chr1;chr1;chr1;chr1;chr1;chr1	16618253;16618256;16618256;16618273;16618969;16619845;16619845;16619845;16619845;16621946;16623870;16624273;16625375;16625775;16625775;16625775;16625775;16625775;16626353;16626353;16626353;16626353;16626353;16626353;16627145;16627145;16627145;16627145;16627145;16628468;16628468;16628468;16628468;16628468;16629670;16630032;16630890;16630890;16630890;16630890;16631530;16631530;16631530;16631530;166…	16619103;16619103;16619103;16619103;16619103;16620024;16620245;16620038;16620024;16622115;16623997;16624467;16626005;16626005;16626005;16626005;16626005;16626005;16626499;16626499;16626499;16626499;16626499;16626386;16627289;16627289;16627289;16627289;16627289;16628650;16628650;16628650;16628650;16628652;16631109;16630142;16631109;16631109;16631109;16631109;16631613;16631613;16631613;16631613;166…	5606	7.77289230778658	8.24056246490653	7.68166265641806	7.79290244689318	8.21001041545466	7.99329541887059	8.33709380346162	8.39457892734421	8.11894425815673	7.9356754854995	7.69132479236531	7.84541178164606	1.3828744267525	1.08015607775442	0.86052260947264	1.04065013905295	0.880705284320376	1.11271721137606
ENSG00000283773.1	RP5-1182A14.8	gene_type transcribed_unprocessed_pseudogene	chr1;chr1	16642767;16643028	16642850;16643109	166	3.55782624462725	3.55782624462725	3.55782624462725	3.55782624462725	3.55782624462725	3.55782624462725	3.55782624462725	3.55782624462725	3.55782624462725	3.55782624462725	3.55782624462725	3.55782624462725	1	1	1	1	1	1
ENSG00000186301.8	MST1P2	gene_type unprocessed_pseudogene	chr1;chr1;chr1;chr1;chr1;chr1;chr1;chr1;chr1;chr1;chr1;chr1;chr1;chr1;chr1;chr1;chr1;chr1	16645622;16646369;16646597;16646787;16646980;16647198;16647463;16647784;16648068;16648299;16648432;16648756;16648881;16649174;16649379;16649607;16649810;16650074	16645678;16646515;16646709;16646901;16647116;16647318;16647581;16647952;16648198;16648401;16648664;16648792;16649001;16649251;16649525;16649713;16649949;16650289	2291	5.19362146911429	4.88822384368833	5.02334307364636	5.26356097242997	5.42916612356277	5.22034689138195	5.58367315386047	5.22502373618048	5.28344478245251	4.7764253630922	4.89885243935514	4.86525230716655	0.809219154536782	1.18117104722253	0.86524509788278	0.779894337924199	0.703674715803137	0.97697927809508
ENSG00000282143.1	RP1-163M9.8	gene_type lincRNA	chr1;chr1;chr1	16656879;16665391;16666941	16656974;16665527;16667524	817	3.55782624462725	3.55782624462725	3.55782624462725	3.55782624462725	3.55782624462725	3.55782624462725	3.55782624462725	3.55782624462725	3.55782624462725	3.55782624462725	3.55782624462725	3.55782624462725	1	1	1	1	1	1
ENSG00000207513.1	RNU1-3	gene_type snRNA	chr1	16666785	16666948	164	3.55782624462725	3.55782624462725	3.55782624462725	3.55782624462725	3.55782624462725	3.55782624462725	3.55782624462725	3.55782624462725	3.55782624462725	3.55782624462725	3.55782624462725	3.55782624462725	1	1	1	1	1	1
ENSG00000237847.2	FAM231A	gene_type protein_coding	chr1	16673003	16673512	510	3.55782624462725	3.55782624462725	3.55782624462725	3.55782624462725	3.55782624462725	3.55782624462725	3.55782624462725	3.55782624462725	3.55782624462725	3.55782624462725	3.55782624462725	3.55782624462725	1	1	1	1	1	1
ENSG00000280114.1	RP5-875O13.7	gene_type unprocessed_pseudogene	chr1;chr1;chr1;chr1;chr1	16681097;16681712;16686639;16687327;16688376	16681227;16682244;16686755;16687522;16688749	1351	4.2369208620727	3.55782624462725	3.55782624462725	3.55782624462725	4.17203110618318	3.9399101021215	3.97903344337653	3.55782624462725	3.55782624462725	3.55782624462725	3.55782624462725	3.55782624462725	0.624557100645793	1	0.851382296235457	0.746799466090436	1	1
ENSG00000236698.1	EIF1AXP1	gene_type processed_pseudogene	chr1	16685621	16686055	435	7.92827421931024	7.83847082398279	7.88626293938766	8.05165578535633	7.76777250332381	7.52342143490038	7.69264138408901	7.53981392431768	7.47740820133833	7.92981407649966	7.56027289524114	7.657880934986	0.939650792316592	1.1214714132058	0.844195434147555	0.899485880424475	1.36832020095477	1.06999795531254
ENSG00000268869.5	ESPNP	gene_type transcribed_unprocessed_pseudogene	chr1;chr1;chr1;chr1;chr1;chr1;chr1;chr1;chr1;chr1;chr1;chr1;chr1;chr1;chr1;chr1;chr1	16687339;16691113;16691218;16692105;16696431;16696779;16699426;16699859;16702701;16703943;16706924;16707288;16707545;16707892;16707892;16710440;16719964	16687522;16691294;16691294;16692309;16696694;16696924;16699621;16700020;16702972;16704144;16707727;16707419;16707727;16708078;16708078;16710619;16720157	3178	4.11398763489342	3.55782624462725	3.96520609223261	3.55782624462725	4.17203110618318	3.55782624462725	4.39158453445309	3.95050242154829	3.96574265195466	3.55782624462725	3.55782624462725	3.9840131269933	0.680109340014304	0.753991493562934	0.653289853716818	0.736581918176769	0.753711125063102	1.34367747037693
ENSG00000279151.1	RP1-163M9.7	gene_type lincRNA	chr1;chr1;chr1	16701546;16702955;16705459	16701695;16703074;16705594	406	3.55782624462725	3.55782624462725	3.55782624462725	3.55782624462725	3.99376167689582	3.55782624462725	3.55782624462725	3.55782624462725	3.55782624462725	3.55782624462725	3.55782624462725	3.55782624462725	1	1	0.73921429838892	1	1	1
ENSG00000279132.2	FAM231C	gene_type protein_coding	chr1	16733952	16734461	510	3.55782624462725	3.55782624462725	3.55782624462725	3.55782624462725	3.55782624462725	3.55782624462725	3.55782624462725	3.55782624462725	3.55782624462725	3.55782624462725	3.55782624462725	3.55782624462725	1	1	1	1	1	1
ENSG00000282740.1	RP5-1182A14.7	gene_type lincRNA	chr1;chr1;chr1	16739938;16741937;16750494	16740523;16742073;16750589	819	3.95230142254003	3.55782624462725	3.55782624462725	3.55782624462725	3.55782624462725	3.55782624462725	3.55782624462725	3.95050242154829	3.96574265195466	3.55782624462725	3.55782624462725	3.55782624462725	0.760766076973291	1	1	1.31282641920024	0.753711125063102	1
ENSG00000058453.16	CROCC	gene_type protein_coding	chr1;chr1;chr1;chr1;chr1;chr1;chr1;chr1;chr1;chr1;chr1;chr1;chr1;chr1;chr1;chr1;chr1;chr1;chr1;chr1;chr1;chr1;chr1;chr1;chr1;chr1;chr1;chr1;chr1;chr1;chr1;chr1;chr1;chr1;chr1;chr1;chr1;chr1;chr1;chr1;chr1;chr1;chr1;chr1;chr1;chr1;chr1;chr1;chr1;chr1;chr1;chr1;chr1;chr1;chr1;chr1;chr1;chr1;chr1;chr1;chr1;chr1;chr1;chr1;chr1;chr1;chr1;chr1;chr1;chr1;chr1;chr1;chr1;chr1;chr1;chr1;chr1;chr1;chr1;chr1…	16740273;16921950;16922663;16922755;16922767;16924325;16924325;16929846;16929846;16930124;16930124;16930135;16930286;16930286;16930286;16930286;16930286;16930429;16930429;16930429;16930429;16930429;16931291;16931291;16931291;16931291;16936637;16936637;16936637;16936637;16936791;16937641;16937641;16937641;16937641;16937641;16937641;16938400;16938400;16938400;16938400;16938909;16938909;16938909;169…	16740397;16922078;16922798;16922798;16922798;16924479;16924479;16930031;16930031;16930207;16930207;16930207;16930347;16930347;16930347;16930347;16930347;16930594;16930594;16930594;16930594;16930594;16931397;16931397;16931397;16931397;16936873;16936873;16936873;16936873;16936873;16937737;16937737;16937737;16937737;16937737;16937737;16938483;16938483;16938483;16938483;16939142;16939142;16939142;169…	8871	6.90508136036811	7.77483455243811	7.21272476754111	7.41372192794827	7.49090976451996	7.53644565829115	7.8530756411498	7.91623250852084	7.94638724664956	7.68025955653926	6.77770795959322	6.53053051355739	1.8273502611952	1.14949258553704	1.03206647256143	1.04474935455924	0.83154849639024	0.842543193502347
ENSG00000227684.2	CROCCP4	gene_type transcribed_unprocessed_pseudogene	chr1;chr1;chr1;chr1;chr1;chr1	16740280;16750233;16750514;16750514;16750673;16750797	16740397;16750421;16750594;16750968;16750732;16750964	762	3.55782624462725	3.55782624462725	3.55782624462725	3.55782624462725	3.99376167689582	3.55782624462725	3.55782624462725	3.55782624462725	3.96574265195466	3.55782624462725	3.55782624462725	3.55782624462725	1	1	0.73921429838892	1	0.753711125063102	1
ENSG00000207389.1	RNU1-4	gene_type snRNA	chr1	16740516	16740679	164	3.55782624462725	3.55782624462725	3.55782624462725	3.99438106532615	3.55782624462725	3.9399101021215	3.55782624462725	3.55782624462725	3.55782624462725	4.38328681413529	3.97541602041241	4.15839371305164	1	1.35336859919879	1.30322289775605	1	1.77210067768438	1.13522454884573
ENSG00000186715.10	MST1L	gene_type transcribed_unprocessed_pseudogene	chr1;chr1;chr1;chr1;chr1;chr1;chr1;chr1;chr1;chr1;chr1;chr1;chr1;chr1;chr1;chr1;chr1;chr1;chr1;chr1;chr1;chr1;chr1;chr1;chr1;chr1;chr1;chr1;chr1;chr1;chr1;chr1;chr1;chr1;chr1;chr1;chr1;chr1;chr1;chr1;chr1;chr1;chr1;chr1;chr1;chr1;chr1	16754910;16755307;16757232;16757518;16757518;16757518;16757754;16757754;16757754;16757942;16757942;16757942;16758053;16758216;16758216;16758466;16758466;16758466;16758675;16758675;16758675;16758803;16758803;16758803;16758803;16759066;16759066;16759269;16759269;16759476;16759476;16759889;16759889;16760152;16760152;16760354;16760354;16760751;16760751;16760837;16760955;16760955;16760955;16764414;167…	16757393;16757393;16757393;16757657;16757657;16757657;16757860;16757860;16757860;16758088;16758088;16758088;16758586;16758293;16758293;16758586;16758586;16758586;16758711;16758711;16758711;16758823;16759035;16759035;16758872;16759168;16759168;16759399;16759399;16759686;16759686;16760007;16760007;16760272;16760272;16760490;16760490;16760873;16760873;16760873;16761102;16761102;16761102;16764480;167…	5180	4.65072872024457	4.65626681633109	4.36473673247505	4.17289735623919	4.7604135404417	3.9399101021215	4.39158453445309	4.42545549391194	4.36577948478197	4.27507766239493	4.47911443934651	3.9840131269933	1.00384609299388	0.875488797609638	0.566244313334676	1.02375532747231	0.9390658142948	0.709511851326511
ENSG00000223643.6	RP11-108M9.1	gene_type lincRNA	chr1;chr1;chr1;chr1;chr1;chr1;chr1	16851257;16851321;16851574;16852075;16852075;16852762;16852997	16851477;16851477;16851723;16852369;16852369;16852799;16853129	837	3.55782624462725	3.55782624462725	3.55782624462725	3.55782624462725	3.55782624462725	3.55782624462725	3.55782624462725	3.55782624462725	3.55782624462725	3.55782624462725	3.55782624462725	3.55782624462725	1	1	1	1	1	1
ENSG00000230239.1	RP11-108M9.2	gene_type lincRNA	chr1;chr1;chr1	16855407;16856712;16859049	16855523;16857240;16859284	882	3.55782624462725	3.55782624462725	3.55782624462725	3.55782624462725	3.55782624462725	3.55782624462725	3.55782624462725	3.55782624462725	3.55782624462725	3.55782624462725	3.55782624462725	3.55782624462725	1	1	1	1	1	1
ENSG00000263811.1	MIR3675	gene_type miRNA	chr1	16858949	16859021	73	3.55782624462725	3.55782624462725	3.55782624462725	3.55782624462725	3.55782624462725	3.55782624462725	3.55782624462725	3.55782624462725	3.55782624462725	3.55782624462725	3.55782624462725	3.55782624462725	1	1	1	1	1	1
ENSG00000228549.3	RP11-108M9.3	gene_type lincRNA	chr1;chr1;chr1;chr1;chr1;chr1;chr1;chr1;chr1;chr1	16870945;16871761;16872157;16872258;16872284;16873039;16873693;16873723;16873723;16873723	16873107;16872153;16872591;16872342;16873507;16873143;16874041;16874092;16874044;16874079	2963	3.55782624462725	3.55782624462725	4.25885812962813	3.55782624462725	3.55782624462725	4.31549205937346	3.55782624462725	4.11146652358321	3.55782624462725	4.14543931115403	3.55782624462725	3.55782624462725	1	0.615132077192249	1.6907528841262	1.4677846135353	1.50275838144031	1
ENSG00000277234.1	RNU1-5P	gene_type snRNA	chr1	16873708	16873851	144	3.55782624462725	3.55782624462725	3.55782624462725	3.55782624462725	3.55782624462725	3.55782624462725	3.55782624462725	3.55782624462725	3.55782624462725	3.55782624462725	3.55782624462725	3.55782624462725	1	1	1	1	1	1
ENSG00000238142.1	RP11-108M9.4	gene_type lincRNA	chr1;chr1;chr1;chr1;chr1;chr1	16888538;16888542;16888542;16889216;16889548;16889548	16888785;16888782;16888785;16889373;16889642;16889649	508	3.55782624462725	3.55782624462725	3.55782624462725	3.55782624462725	3.55782624462725	3.55782624462725	3.55782624462725	3.55782624462725	3.55782624462725	3.97475709050258	3.55782624462725	3.55782624462725	1	1	1	1	1.33508430584895	1
ENSG00000235241.1	RP11-108M9.5	gene_type processed_pseudogene	chr1	16889095	16889602	508	3.55782624462725	3.55782624462725	3.55782624462725	3.55782624462725	3.55782624462725	3.55782624462725	4.1514250525846	3.55782624462725	3.55782624462725	3.55782624462725	3.55782624462725	3.55782624462725	1	1	1	0.662687766517553	1	1
ENSG00000207005.1	RNU1-2	gene_type snRNA	chr1	16895980	16896143	164	3.55782624462725	3.95438272415751	3.55782624462725	4.42132383357474	3.55782624462725	3.55782624462725	3.55782624462725	3.55782624462725	4.13281753800557	3.55782624462725	3.55782624462725	3.55782624462725	1.3163621772543	1.81944392592862	1	1	0.671290302594927	1
ENSG00000272426.1	RP11-108M9.6	gene_type lincRNA	chr1	16904339	16904776	438	4.11398763489342	4.11690410408451	3.96520609223261	4.17289735623919	3.99376167689582	4.09661836972613	3.97903344337653	4.23386063257747	3.96574265195466	4.14543931115403	3.97541602041241	3.9840131269933	1.00202358709141	1.15483862323957	1.07389779287468	1.19319280987744	1.13264571037339	1.00597685070739
ENSG00000117122.13	MFAP2	gene_type protein_coding	chr1;chr1;chr1;chr1;chr1;chr1;chr1;chr1;chr1;chr1;chr1;chr1;chr1;chr1;chr1;chr1;chr1;chr1;chr1;chr1;chr1;chr1;chr1;chr1;chr1;chr1;chr1;chr1;chr1;chr1;chr1;chr1;chr1;chr1;chr1;chr1;chr1;chr1	16974502;16974502;16974502;16975269;16975269;16975269;16975643;16975643;16975643;16975662;16976171;16976249;16976501;16976501;16976501;16976501;16976708;16976708;16976708;16976708;16976708;16976708;16976897;16976897;16976897;16977109;16977109;16977109;16977109;16977109;16978237;16978237;16978237;16978237;16978237;16980587;16980587;16980587	16975023;16975023;16975023;16975342;16975342;16975342;16975730;16975730;16975730;16975730;16976545;16976545;16976545;16976545;16976545;16976545;16976923;16976794;16976923;16976794;16978314;16976794;16976923;16976923;16976923;16977198;16977198;16977198;16977198;16977195;16978314;16978314;16978314;16978314;16978276;16980632;16980835;16980621	2915	6.48110793468391	6.4781707842891	6.12459382591309	5.96872470567316	6.51374318046395	6.58577070113122	6.96054780750866	6.97770074332293	7.0282893918425	6.87591138624646	5.88155819770391	5.81468545545703	0.997966193477919	0.897591475518052	1.0511929613198	1.01196047026356	0.899766148016418	0.954705223400831
ENSG00000226526.1	RP1-37C10.3	gene_type antisense	chr1;chr1	16978926;17004643	16979112;17005091	636	3.55782624462725	3.55782624462725	3.55782624462725	3.55782624462725	3.55782624462725	3.55782624462725	3.55782624462725	3.55782624462725	3.55782624462725	3.55782624462725	3.55782624462725	3.55782624462725	1	1	1	1	1	1
ENSG00000159363.17	ATP13A2	gene_type protein_coding	chr1;chr1;chr1;chr1;chr1;chr1;chr1;chr1;chr1;chr1;chr1;chr1;chr1;chr1;chr1;chr1;chr1;chr1;chr1;chr1;chr1;chr1;chr1;chr1;chr1;chr1;chr1;chr1;chr1;chr1;chr1;chr1;chr1;chr1;chr1;chr1;chr1;chr1;chr1;chr1;chr1;chr1;chr1;chr1;chr1;chr1;chr1;chr1;chr1;chr1;chr1;chr1;chr1;chr1;chr1;chr1;chr1;chr1;chr1;chr1;chr1;chr1;chr1;chr1;chr1;chr1;chr1;chr1;chr1;chr1;chr1;chr1;chr1;chr1;chr1;chr1;chr1;chr1;chr1;chr1…	16985958;16985958;16985958;16985959;16985981;16986463;16986463;16986463;16986805;16986805;16986805;16986805;16987046;16987046;16987046;16987046;16987046;16988138;16988138;16988138;16988138;16988138;16988322;16988322;16988322;16988322;16988322;16989691;16989691;16989691;16989691;16989691;16989887;16989887;16989887;16989887;16990127;16990127;16990127;16990127;16990175;16991734;16991734;16991734;169…	16986358;16986358;16986358;16986358;16986358;16986956;16986632;16986632;16986956;16986956;16986956;16986956;16987269;16987269;16987269;16987269;16987269;16988234;16988234;16988234;16988234;16988234;16988474;16988474;16988474;16988474;16988474;16989770;16989770;16989770;16989770;16989770;16990003;16990003;16990003;16990003;16990287;16990287;16990287;16990287;16990287;16991858;16991858;16991858;169…	5253	8.64289111585737	9.55326457497145	9.07521608322966	9.44505361467226	9.41839182004615	9.80700159895381	9.5414804757095	9.88704809651035	9.90515304549417	9.89543153443311	9.17422153283659	9.21863431101604	1.87953197511431	1.29220730100589	1.30913128051174	1.27065081510621	0.993284214381392	1.03126333756133
ENSG00000117118.9	SDHB	gene_type protein_coding	chr1;chr1;chr1;chr1;chr1;chr1;chr1;chr1;chr1;chr1;chr1;chr1;chr1;chr1;chr1;chr1;chr1;chr1;chr1;chr1;chr1;chr1;chr1;chr1;chr1;chr1;chr1;chr1;chr1;chr1;chr1;chr1;chr1;chr1;chr1;chr1;chr1;chr1	17018722;17018752;17018752;17022608;17022608;17022608;17022608;17023094;17023973;17023973;17023973;17027656;17027749;17027749;17027749;17027749;17028600;17028600;17028600;17028600;17028654;17032530;17033060;17033060;17033060;17033060;17033060;17044761;17044761;17044761;17044761;17044761;17044761;17045141;17052255;17053948;17053948;17053948	17018958;17018958;17018958;17022730;17022730;17023036;17022730;17023160;17024074;17024074;17024074;17027865;17027865;17027865;17027865;17027865;17028736;17028736;17028736;17028736;17028736;17033145;17033145;17033145;17033145;17033145;17033145;17044888;17044888;17044888;17044877;17044888;17044888;17045219;17052488;17054031;17054007;17054170	2462	10.5252768790736	10.2190522820464	10.5138528180487	10.4524545943875	10.2800840891801	10.3594669916055	9.8103887178604	10.0831138515091	10.2643662711755	10.220502130543	9.70240802291188	9.63407375871399	0.808755432488633	0.958334875097995	1.05656600893522	1.20808765317602	0.970053256477196	0.953738549173677
ENSG00000117115.12	PADI2	gene_type protein_coding	chr1;chr1;chr1;chr1;chr1;chr1;chr1;chr1;chr1;chr1;chr1;chr1;chr1;chr1;chr1;chr1;chr1;chr1;chr1;chr1;chr1;chr1;chr1;chr1;chr1;chr1;chr1;chr1;chr1;chr1;chr1;chr1;chr1;chr1;chr1;chr1;chr1;chr1	17066761;17067600;17067786;17070088;17070088;17070088;17071406;17071406;17071406;17074856;17074856;17074856;17075679;17079031;17079264;17079264;17082545;17082545;17082545;17083236;17083726;17083726;17084599;17084599;17086521;17086521;17092408;17092408;17093567;17093567;17095909;17095909;17102987;17102987;17104878;17104878;17119280;17119280	17069277;17069277;17069277;17070216;17070216;17070216;17071491;17071491;17071491;17075823;17075351;17074949;17075823;17079415;17079415;17079415;17082652;17083138;17082652;17083426;17083837;17083837;17084702;17084702;17086699;17086699;17092533;17092533;17093684;17093684;17095970;17095970;17103059;17103059;17105061;17105061;17119435;17119435	5984	7.1515744404935	7.06113984733298	7.13671856155666	7.28828468148188	6.87919676718808	6.8400298804661	7.84673712442155	8.26040501326453	6.97447795196279	6.92423288912724	5.69122726732239	5.66805469524307	0.93923977280077	1.11077462100264	0.973216788788932	1.33206814516013	0.965772264458411	0.98406630309764
ENSG00000204362.6	RP11-380J14.1	gene_type lincRNA	chr1;chr1;chr1;chr1;chr1;chr1;chr1	17189783;17189789;17192965;17192965;17193291;17195443;17196300	17189930;17189930;17193165;17193165;17197617;17195601;17196387	4676	3.55782624462725	3.55782624462725	3.55782624462725	3.55782624462725	3.55782624462725	3.55782624462725	3.55782624462725	3.55782624462725	3.55782624462725	3.55782624462725	3.55782624462725	3.55782624462725	1	1	1	1	1	1
ENSG00000282843.1	RP11-380J14.4	gene_type lincRNA	chr1;chr1;chr1;chr1;chr1	17193232;17195020;17196529;17197570;17201456	17193797;17195133;17196754;17197613;17201733	1228	3.55782624462725	3.55782624462725	3.55782624462725	3.55782624462725	3.55782624462725	3.55782624462725	3.55782624462725	3.55782624462725	3.55782624462725	3.55782624462725	3.55782624462725	3.55782624462725	1	1	1	1	1	1
ENSG00000142623.9	PADI1	gene_type protein_coding	chr1;chr1;chr1;chr1;chr1;chr1;chr1;chr1;chr1;chr1;chr1;chr1;chr1;chr1;chr1;chr1;chr1;chr1;chr1;chr1;chr1;chr1	17205126;17222290;17223487;17223621;17224367;17224367;17225811;17225811;17226033;17226033;17228625;17228948;17230085;17230572;17232819;17237314;17238616;17239632;17239704;17240635;17244010;17244010	17205309;17222470;17223693;17223693;17224428;17224428;17225928;17225928;17226158;17226158;17228797;17229051;17230208;17230679;17232970;17237458;17238709;17240760;17239783;17240760;17246004;17246005	4903	3.55782624462725	3.55782624462725	3.55782624462725	3.55782624462725	3.55782624462725	3.9399101021215	3.55782624462725	3.55782624462725	3.55782624462725	3.55782624462725	3.55782624462725	3.55782624462725	1	1	1.30322289775605	1	1	1
ENSG00000142619.4	PADI3	gene_type protein_coding	chr1;chr1;chr1;chr1;chr1;chr1;chr1;chr1;chr1;chr1;chr1;chr1;chr1;chr1;chr1;chr1	17249098;17259578;17262133;17265659;17266719;17267837;17270233;17270879;17271067;17273340;17274635;17276519;17276774;17280350;17280671;17282846	17249229;17259758;17262205;17265720;17266836;17267962;17270411;17270982;17271178;17273447;17274786;17276663;17276876;17280429;17280796;17284233	3189	3.55782624462725	3.55782624462725	3.55782624462725	3.55782624462725	3.55782624462725	3.55782624462725	3.97903344337653	3.55782624462725	3.55782624462725	3.55782624462725	3.55782624462725	3.55782624462725	1	1	1	0.746799466090436	1	1
ENSG00000266634.1	MIR3972	gene_type miRNA	chr1	17277889	17277975	87	3.55782624462725	3.55782624462725	3.55782624462725	3.55782624462725	3.55782624462725	3.55782624462725	3.55782624462725	3.55782624462725	3.55782624462725	3.55782624462725	3.55782624462725	3.55782624462725	1	1	1	1	1	1
ENSG00000159339.13	PADI4	gene_type protein_coding	chr1;chr1;chr1;chr1;chr1;chr1;chr1;chr1;chr1;chr1;chr1;chr1;chr1;chr1;chr1;chr1;chr1;chr1;chr1;chr1;chr1;chr1;chr1;chr1;chr1;chr1;chr1;chr1;chr1;chr1;chr1	17308195;17308197;17330969;17330969;17333943;17333943;17334324;17336159;17338038;17339688;17341943;17342299;17346028;17346034;17347927;17347941;17347941;17348730;17354533;17354533;17354533;17355983;17355983;17355983;17356357;17356357;17356357;17358838;17358838;17359280;17363522	17308314;17308314;17331149;17331149;17334009;17334009;17334796;17336226;17338155;17339813;17342121;17342402;17346139;17346139;17348048;17348207;17348048;17348785;17354687;17354687;17354687;17356127;17356127;17356127;17356459;17356447;17356459;17358849;17358908;17359408;17364004	2971	3.55782624462725	3.55782624462725	3.55782624462725	3.55782624462725	3.55782624462725	3.55782624462725	3.55782624462725	3.55782624462725	3.55782624462725	3.55782624462725	3.55782624462725	3.55782624462725	1	1	1	1	1	1
ENSG00000276747.1	PADI6	gene_type protein_coding	chr1;chr1;chr1;chr1;chr1;chr1;chr1;chr1;chr1;chr1;chr1;chr1;chr1;chr1;chr1;chr1	17372196;17373056;17375427;17379920;17381047;17381967;17388381;17388777;17392114;17393975;17394300;17394951;17395540;17397071;17398686;17401205	17372361;17373233;17375499;17379987;17381164;17382092;17388559;17388880;17392225;17394082;17394454;17395107;17395663;17397141;17398847;17401699	2396	3.55782624462725	3.55782624462725	3.55782624462725	3.55782624462725	3.55782624462725	3.55782624462725	3.55782624462725	3.55782624462725	3.55782624462725	3.55782624462725	3.55782624462725	3.55782624462725	1	1	1	1	1	1
ENSG00000227751.1	RP1-20B21.4	gene_type antisense	chr1;chr1	17406760;17407317	17407004;17407382	311	3.55782624462725	3.55782624462725	3.55782624462725	3.55782624462725	3.55782624462725	3.55782624462725	3.55782624462725	3.55782624462725	3.55782624462725	3.55782624462725	3.55782624462725	3.55782624462725	1	1	1	1	1	1
ENSG00000179051.13	RCC2	gene_type protein_coding	chr1;chr1;chr1;chr1;chr1;chr1;chr1;chr1;chr1;chr1;chr1;chr1;chr1;chr1;chr1;chr1;chr1;chr1;chr1;chr1;chr1;chr1;chr1;chr1;chr1;chr1;chr1	17406760;17407839;17408676;17408980;17409974;17409974;17412122;17412122;17413073;17413073;17413537;17413537;17416480;17416480;17420714;17420714;17422203;17422203;17422705;17422705;17425541;17425541;17429106;17429106;17438230;17438230;17439545	17409194;17408554;17409194;17409046;17410051;17410051;17412194;17412194;17413178;17413178;17413717;17413717;17416646;17416646;17420828;17420828;17422291;17422291;17422836;17422836;17425684;17425684;17429199;17429199;17438561;17438522;17439724	4126	3.95230142254003	4.11690410408451	4.13206609265227	4.17289735623919	3.99376167689582	4.40257149830365	3.55782624462725	3.95050242154829	4.13281753800557	3.97475709050258	3.97541602041241	3.55782624462725	1.12085735121679	1.0287063842134	1.32759014158485	1.31282641920024	0.896229147663079	0.748674345507322
ENSG00000074964.16	ARHGEF10L	gene_type protein_coding	chr1;chr1;chr1;chr1;chr1;chr1;chr1;chr1;chr1;chr1;chr1;chr1;chr1;chr1;chr1;chr1;chr1;chr1;chr1;chr1;chr1;chr1;chr1;chr1;chr1;chr1;chr1;chr1;chr1;chr1;chr1;chr1;chr1;chr1;chr1;chr1;chr1;chr1;chr1;chr1;chr1;chr1;chr1;chr1;chr1;chr1;chr1;chr1;chr1;chr1;chr1;chr1;chr1;chr1;chr1;chr1;chr1;chr1;chr1;chr1;chr1;chr1;chr1;chr1;chr1;chr1;chr1;chr1;chr1;chr1;chr1;chr1;chr1;chr1;chr1;chr1;chr1;chr1;chr1;chr1…	17539835;17580553;17580553;17587460;17587460;17588446;17588446;17602127;17602127;17602171;17603508;17603508;17603508;17604476;17607802;17607802;17613058;17615088;17616094;17616094;17618316;17619339;17619339;17619339;17619339;17621864;17621864;17621864;17621864;17622996;17622996;17622996;17622996;17624387;17624387;17624387;17624387;17625956;17625956;17625956;17625956;17626007;17627330;17627330;176…	17539950;17580632;17580632;17587645;17587645;17588479;17588479;17602218;17602218;17602218;17603591;17603591;17603591;17604882;17607977;17607977;17613174;17616202;17616202;17616202;17618522;17619445;17619445;17619445;17619445;17621941;17621941;17621941;17621941;17623175;17623175;17623175;17623175;17624503;17624503;17624503;17624503;17626048;17626048;17626048;17626048;17626048;17627503;17627503;176…	7817	9.09745043941169	10.2753835803856	9.09780267974652	10.0964129126116	9.24627738301173	9.88387770713026	9.69720850910044	10.3518653467769	9.66350117686055	10.1251983014688	9.21822225055949	9.61895525407319	2.26252407078014	1.99807430133193	1.55573930039678	1.57424145638428	1.37716089869689	1.32017849579419
ENSG00000236648.1	RP11-473A10.2	gene_type lincRNA	chr1;chr1;chr1;chr1	17717687;17718560;17721680;17749677	17717744;17718720;17721768;17749978	610	3.55782624462725	3.55782624462725	3.55782624462725	3.55782624462725	3.55782624462725	3.55782624462725	3.55782624462725	3.55782624462725	3.55782624462725	3.55782624462725	3.55782624462725	3.55782624462725	1	1	1	1	1	1
ENSG00000117148.7	ACTL8	gene_type protein_coding	chr1;chr1;chr1;chr1;chr1	17755313;17822982;17822985;17825767;17825767	17755504;17823356;17823356;17827063;17827061	1864	5.02618270918522	5.34846533069821	5.24215785161165	5.47016231965307	5.74045014419768	5.93465340053824	5.33391625330775	6.04937501477824	4.36577948478197	4.7764253630922	5.23895909440223	5.03471918948832	1.25030721165915	1.17121380847443	1.1440921490563	1.64200527458856	1.32928078493175	0.867995877073051
ENSG00000261781.1	LINC01654	gene_type lincRNA	chr1;chr1;chr1	18065657;18068192;18072220	18065847;18068278;18074412	2471	3.55782624462725	3.55782624462725	3.55782624462725	3.55782624462725	3.55782624462725	3.55782624462725	3.55782624462725	3.55782624462725	3.55782624462725	3.97475709050258	3.55782624462725	3.55782624462725	1	1	1	1	1.33508430584895	1
ENSG00000117154.11	IGSF21	gene_type protein_coding	chr1;chr1;chr1;chr1;chr1;chr1;chr1;chr1;chr1;chr1;chr1;chr1;chr1;chr1;chr1;chr1;chr1;chr1;chr1;chr1;chr1;chr1;chr1;chr1	18107746;18227898;18278845;18291866;18291866;18334892;18334892;18361367;18362115;18362115;18365223;18365223;18365223;18375957;18376310;18376310;18376310;18376800;18376800;18376800;18377393;18377393;18378256;18378256	18108198;18228010;18278884;18291987;18291987;18335010;18335010;18362230;18362230;18362230;18365697;18365697;18365697;18376395;18376395;18376367;18376395;18376992;18376920;18376992;18377431;18377431;18378483;18378482	3085	3.55782624462725	3.55782624462725	3.55782624462725	3.55782624462725	3.55782624462725	3.55782624462725	3.55782624462725	3.55782624462725	3.55782624462725	4.14543931115403	3.55782624462725	3.55782624462725	1	1	1	1	1.50275838144031	1
ENSG00000280222.1	RP11-174G17.3	gene_type TEC	chr1	18109389	18115861	6473	3.55782624462725	3.55782624462725	3.55782624462725	3.55782624462725	3.55782624462725	3.55782624462725	3.55782624462725	3.55782624462725	3.55782624462725	4.14543931115403	3.55782624462725	3.55782624462725	1	1	1	1	1.50275838144031	1
ENSG00000230035.2	RP11-174G17	gene_type antisense	chr1;chr1;chr1;chr1	18166929;18167747;18176153;18179052	18167024;18167763;18176174;18179346	430	3.55782624462725	3.55782624462725	3.55782624462725	3.55782624462725	3.55782624462725	3.55782624462725	3.55782624462725	3.55782624462725	3.55782624462725	3.55782624462725	3.55782624462725	3.55782624462725	1	1	1	1	1	1
ENSG00000225387.1	RP11-422P22.1	gene_type lincRNA	chr1;chr1	18385829;18388416	18386220;18388514	491	3.55782624462725	3.55782624462725	3.55782624462725	3.55782624462725	3.55782624462725	3.55782624462725	3.55782624462725	3.55782624462725	3.55782624462725	3.55782624462725	3.55782624462725	3.55782624462725	1	1	1	1	1	1
ENSG00000179023.8	KLHDC7A	gene_type protein_coding	chr1	18480982	18486126	5145	6.19059203068633	5.62636208486135	5.95327066375507	5.43152304054656	6.59811898303396	5.91414599676902	7.10639831270702	6.04937501477824	6.36682623618156	5.35635212438161	7.36448464833927	6.61031786277133	0.676316311379434	0.696527576214704	0.622448772620458	0.480622702606804	0.496383094903725	0.592888703690898
ENSG00000235282.3	DYNLL1P3	gene_type processed_pseudogene	chr1	18513118	18513383	266	3.55782624462725	3.55782624462725	3.55782624462725	3.55782624462725	3.55782624462725	3.55782624462725	3.55782624462725	3.55782624462725	3.55782624462725	3.55782624462725	3.55782624462725	3.55782624462725	1	1	1	1	1	1
ENSG00000225478.2	RP1-8B22.2	gene_type processed_pseudogene	chr1	18595414	18595636	223	3.55782624462725	3.55782624462725	3.55782624462725	3.55782624462725	3.55782624462725	3.55782624462725	3.55782624462725	3.55782624462725	3.55782624462725	3.55782624462725	3.55782624462725	3.55782624462725	1	1	1	1	1	1
ENSG00000009709.11	PAX7	gene_type protein_coding	chr1;chr1;chr1;chr1;chr1;chr1;chr1;chr1;chr1;chr1;chr1;chr1;chr1;chr1;chr1;chr1;chr1;chr1;chr1;chr1;chr1;chr1;chr1;chr1;chr1	18631006;18631521;18631524;18634303;18634303;18634303;18635111;18635111;18635111;18636237;18636237;18636243;18691754;18691754;18691754;18700653;18700653;18700653;18703094;18703094;18703094;18735632;18735632;18735632;18744814	18631688;18631688;18631688;18634538;18634538;18634538;18635240;18635240;18635240;18636371;18636371;18636371;18691953;18691953;18691953;18700818;18700818;18700818;18703296;18703296;18703296;18736102;18735878;18736138;18748866	6313	3.55782624462725	3.95438272415751	3.55782624462725	4.30835738787737	3.99376167689582	4.09661836972613	3.55782624462725	3.55782624462725	4.25976969624512	4.71030396550859	3.55782624462725	3.55782624462725	1.3163621772543	1.68241211409735	1.07389779287468	1	1.3665462323462	1
ENSG00000179002.5	TAS1R2	gene_type protein_coding	chr1;chr1;chr1;chr1;chr1;chr1	18839599;18841729;18849341;18854213;18857331;18859479	18840527;18841852;18849550;18854986;18857631;18859682	2542	3.95230142254003	3.55782624462725	3.55782624462725	3.55782624462725	3.55782624462725	3.55782624462725	3.55782624462725	3.55782624462725	3.55782624462725	3.55782624462725	3.55782624462725	3.55782624462725	0.760766076973291	1	1	1	1	1
ENSG00000255275.3	RP13-279N23.2	gene_type protein_coding	chr1;chr1;chr1;chr1;chr1;chr1;chr1;chr1;chr1;chr1;chr1;chr1;chr1;chr1;chr1;chr1;chr1;chr1;chr1;chr1;chr1;chr1;chr1;chr1;chr1;chr1;chr1	18849273;18854213;18857331;18858290;18859475;18874463;18875382;18876315;18877208;18877416;18879300;18881700;18883124;18883279;18885284;18885473;18886464;18889362;18890012;18908539;18910342;18911384;18911963;18916903;18918362;18919678;18921061	18849550;18854986;18857618;18858462;18859699;18874581;18875503;18876467;18877255;18877612;18879373;18881887;18883198;18883428;18885398;18885628;18886511;18889454;18890193;18908666;18910472;18911476;18912083;18917042;18918502;18919773;18921121	4369	3.55782624462725	3.55782624462725	3.55782624462725	3.55782624462725	3.55782624462725	3.55782624462725	3.55782624462725	3.55782624462725	3.96574265195466	3.55782624462725	3.55782624462725	3.55782624462725	1	1	1	1	0.753711125063102	1
ENSG00000159423.16	ALDH4A1	gene_type protein_coding	chr1;chr1;chr1;chr1;chr1;chr1;chr1;chr1;chr1;chr1;chr1;chr1;chr1;chr1;chr1;chr1;chr1;chr1;chr1;chr1;chr1;chr1;chr1;chr1;chr1;chr1;chr1;chr1;chr1;chr1;chr1;chr1;chr1;chr1;chr1;chr1;chr1;chr1;chr1;chr1;chr1;chr1;chr1;chr1;chr1;chr1;chr1;chr1;chr1;chr1;chr1;chr1;chr1;chr1;chr1;chr1;chr1;chr1;chr1;chr1;chr1;chr1;chr1;chr1;chr1;chr1;chr1;chr1;chr1;chr1	18871430;18871432;18871432;18872733;18872804;18874463;18874463;18874463;18874463;18875382;18875382;18875382;18875382;18876315;18876315;18876315;18877208;18877208;18877208;18877208;18877416;18877416;18877416;18877416;18879300;18879300;18879300;18879300;18881700;18881700;18881700;18881700;18882560;18883111;18883124;18883124;18883124;18883124;18883124;18883279;18883279;18883279;18883279;18883279;188…	18871790;18872957;18872957;18872957;18872957;18874581;18874581;18874581;18874581;18875503;18875503;18875503;18875503;18876467;18876467;18876467;18877255;18877255;18877255;18877255;18877612;18877612;18877612;18877612;18879373;18879373;18879373;18879373;18881887;18881887;18881887;18881887;18882672;18883198;18883198;18883198;18883198;18883198;18883198;18883428;18883428;18883428;18883428;18883428;188…	3689	9.06200196880206	9.06460716424267	9.29529005588671	9.2502484457604	9.13107899679485	8.8332591411024	9.30363559179252	9.57294337348374	9.7549758440895	9.7116480173376	8.89278505021336	8.70964772145143	1.00180741528401	0.969261861137789	0.813480768302345	1.20522940881534	0.970413935431664	0.880785529003872
ENSG00000265606.1	MIR4695	gene_type miRNA	chr1	18883202	18883275	74	3.55782624462725	3.55782624462725	3.55782624462725	3.55782624462725	3.55782624462725	3.55782624462725	3.55782624462725	3.55782624462725	3.55782624462725	3.55782624462725	3.55782624462725	3.55782624462725	1	1	1	1	1	1
ENSG00000221662.1	MIR1290	gene_type miRNA	chr1	18897071	18897148	78	3.55782624462725	3.55782624462725	3.55782624462725	3.99438106532615	3.55782624462725	3.55782624462725	3.55782624462725	3.55782624462725	3.55782624462725	3.55782624462725	3.55782624462725	3.55782624462725	1	1.35336859919879	1	1	1	1
ENSG00000169991.10	IFFO2	gene_type protein_coding	chr1;chr1;chr1;chr1;chr1;chr1;chr1;chr1;chr1;chr1;chr1;chr1;chr1;chr1;chr1;chr1;chr1;chr1;chr1;chr1	18904281;18908291;18908340;18910342;18910342;18910342;18911384;18911384;18911963;18911963;18911963;18916903;18916903;18918362;18919678;18919678;18921061;18921061;18955668;18955668	18908666;18908666;18908666;18910472;18910472;18910472;18911476;18911476;18912083;18911992;18912083;18917042;18917042;18918502;18919773;18919773;18921121;18921121;18955698;18956686	6188	7.20487452554829	7.57862370246859	7.84523437535672	7.67474994063591	7.66335665337786	7.96472861588567	8.42469640481881	8.40583844734282	8.54265771590492	8.06961893815763	7.90430040361217	7.79909721317561	1.29571567620716	0.888544271620633	1.23231575400895	0.987013718894982	0.720445509529933	0.929673997289911
ENSG00000272084.1	RP5-1126H10.2	gene_type 3prime_overlapping_ncRNA	chr1	19072110	19075511	3402	4.11398763489342	4.11690410408451	3.96520609223261	3.99438106532615	4.51847424846376	4.21583248886372	4.57221240555981	3.95050242154829	3.96574265195466	4.27507766239493	4.27619612797294	3.55782624462725	1.00202358709141	1.02042841145107	0.810766418995482	0.649900163474752	1.2391364061538	0.607783795817753
ENSG00000127481.14	UBR4	gene_type protein_coding	chr1;chr1;chr1;chr1;chr1;chr1;chr1;chr1;chr1;chr1;chr1;chr1;chr1;chr1;chr1;chr1;chr1;chr1;chr1;chr1;chr1;chr1;chr1;chr1;chr1;chr1;chr1;chr1;chr1;chr1;chr1;chr1;chr1;chr1;chr1;chr1;chr1;chr1;chr1;chr1;chr1;chr1;chr1;chr1;chr1;chr1;chr1;chr1;chr1;chr1;chr1;chr1;chr1;chr1;chr1;chr1;chr1;chr1;chr1;chr1;chr1;chr1;chr1;chr1;chr1;chr1;chr1;chr1;chr1;chr1;chr1;chr1;chr1;chr1;chr1;chr1;chr1;chr1;chr1;chr1…	19074506;19074510;19074514;19074518;19074567;19076740;19076740;19076740;19076740;19076740;19077785;19077976;19077976;19077976;19077976;19081349;19081349;19081349;19084504;19084504;19086145;19086145;19086679;19086679;19087816;19087816;19088759;19088759;19092733;19092819;19092819;19093313;19093313;19093313;19093361;19093949;19093949;19093949;19094095;19094906;19094906;19094906;19094906;19095545;190…	19074896;19074896;19074896;19074896;19074896;19076902;19076902;19076902;19076902;19076902;19077827;19081306;19078066;19078066;19078066;19081573;19081573;19082240;19084698;19084698;19086270;19086270;19086821;19086821;19087929;19087929;19088977;19088977;19092918;19092918;19092918;19093440;19093486;19093486;19093486;19094139;19094139;19094139;19094139;19095025;19095025;19095025;19095025;19095922;190…	24675	10.5278765290725	11.331541405847	10.9800324405392	11.2875733633775	11.4652996314147	11.5895725021142	11.538442825928	11.6593820546082	11.5829434034733	11.1015975843597	11.0625672377695	11.2512195745167	1.74552966657518	1.23759641504372	1.08995824693746	1.08744258303617	0.716309102775901	1.13969859297607
ENSG00000230424.1	RP1-43E13.2	gene_type antisense	chr1;chr1	19210501;19240257	19210559;19240704	507	4.33963517379083	4.51461706795932	4.53994339918289	4.17289735623919	4.7604135404417	4.21583248886372	4.1514250525846	4.3361324333863	3.96574265195466	4.14543931115403	3.55782624462725	3.55782624462725	1.12895023638491	0.775368460427013	0.68559046420052	1.13658641810945	1.13264571037339	1
ENSG00000127463.13	EMC1	gene_type protein_coding	chr1;chr1;chr1;chr1;chr1;chr1;chr1;chr1;chr1;chr1;chr1;chr1;chr1;chr1;chr1;chr1;chr1;chr1;chr1;chr1;chr1;chr1;chr1;chr1;chr1;chr1;chr1;chr1;chr1;chr1;chr1;chr1;chr1;chr1;chr1;chr1;chr1;chr1;chr1;chr1;chr1;chr1;chr1;chr1;chr1;chr1;chr1;chr1;chr1;chr1;chr1;chr1;chr1;chr1;chr1;chr1;chr1;chr1;chr1;chr1;chr1;chr1;chr1;chr1;chr1;chr1;chr1;chr1;chr1;chr1;chr1;chr1;chr1;chr1;chr1;chr1;chr1;chr1;chr1;chr1…	19215664;19216874;19216874;19218148;19218945;19219370;19219382;19219568;19219569;19219569;19219569;19219569;19219569;19219569;19219569;19219615;19219650;19220764;19220764;19220764;19220764;19220764;19220764;19220764;19220764;19220764;19222624;19222624;19222624;19222624;19222624;19222624;19222624;19222624;19223396;19223396;19223396;19223396;19223396;19227313;19227313;19227313;19227313;19229355;192…	19219482;19219482;19219482;19219482;19219482;19219482;19219482;19219698;19219669;19219669;19219698;19221205;19219698;19219698;19219698;19219669;19219698;19220810;19220848;19220848;19220848;19220810;19220848;19220848;19221916;19220848;19222834;19223007;19222686;19222834;19222761;19222834;19222834;19222834;19223569;19223506;19223569;19223569;19223569;19227450;19227450;19227450;19227450;19229395;192…	10650	9.66037872611759	10.2233813053798	9.90284828677999	10.3102988104359	10.1892799354235	10.3703752378296	9.99611043723943	10.2295536580995	10.2464667611262	10.1084679144446	9.56908945633813	9.83224530519227	1.47734070478225	1.3263398839946	1.13374430385956	1.17563744909622	0.908778842943625	1.20010101771625
ENSG00000053372.4	MRTO4	gene_type protein_coding	chr1;chr1;chr1;chr1;chr1;chr1;chr1;chr1;chr1;chr1;chr1;chr1;chr1;chr1	19251539;19251835;19254782;19254782;19255948;19255948;19257064;19257454;19257712;19257833;19258477;19258477;19258681;19258681	19251863;19252248;19254840;19254840;19256052;19256051;19257145;19257521;19257984;19257984;19258553;19258553;19258739;19260128	2822	10.3105768025358	10.5202233407567	10.557943922911	10.8793255852927	10.3222082719798	10.6419694598306	9.81201247520216	10.4237033254715	10.2897138030272	10.5977491948483	9.9192849245011	9.90259833109526	1.1564048288149	1.24952664196144	1.24812392739089	1.52804904575828	1.23802066126715	0.988500366930333
ENSG00000211454.13	AKR7L	gene_type polymorphic_pseudogene	chr1;chr1;chr1;chr1;chr1;chr1;chr1;chr1;chr1;chr1;chr1;chr1;chr1;chr1;chr1;chr1;chr1;chr1;chr1;chr1;chr1;chr1	19265982;19267103;19267130;19268572;19268572;19268572;19269272;19269272;19269583;19269583;19270451;19270451;19270451;19270533;19270748;19270748;19270748;19270748;19270835;19273861;19273861;19273861	19267461;19267461;19267461;19268701;19268701;19268701;19269371;19269371;19269679;19269679;19270555;19270555;19270555;19270555;19270831;19271269;19270935;19270935;19270935;19274151;19274194;19273941	2768	4.58305459595839	4.43382827630526	4.68501284740425	4.51980079659829	4.8290842810492	4.40257149830365	4.72160454055041	4.7676517037665	4.68643555104792	4.83841377104749	4.38456570337338	4.49757563693745	0.901733909736398	0.89179743124343	0.744058117089017	1.03243228622733	1.11109195465558	1.08148220991931
ENSG00000162482.4	AKR7A3	gene_type protein_coding	chr1;chr1;chr1;chr1;chr1;chr1;chr1	19282558;19283996;19284686;19285018;19285888;19286185;19288496	19282892;19284125;19284785;19285114;19285992;19286372;19289250	1710	4.82873677450076	4.83507646650019	4.68501284740425	5.0133520825139	4.95403865708526	5.14664629201116	4.85082485685873	4.97407035781243	4.97573403665526	5.10325960928617	4.64091134249155	4.86525230716655	1.0044040089036	1.25556719046787	1.14282748207483	1.08918234386832	1.09241844041493	1.16824346313403
ENSG00000270728.1	RP4-657E11.10	gene_type processed_pseudogene	chr1;chr1	19297080;19297489	19297189;19297903	525	4.82873677450076	5.62636208486135	5.24215785161165	5.39164359128636	5.42916612356277	5.47680275730513	5.25214772098662	5.26202784332806	5.20354744599443	4.95223473808129	4.77825682765974	5.08584679014197	1.73823761505235	1.10917402753195	1.03357038191732	1.00687188271526	0.840131631773925	1.23763848375347
ENSG00000053371.12	AKR7A2	gene_type protein_coding	chr1;chr1;chr1;chr1;chr1;chr1;chr1;chr1;chr1;chr1;chr1;chr1;chr1;chr1;chr1;chr1;chr1;chr1;chr1;chr1;chr1;chr1;chr1;chr1;chr1;chr1	19303965;19303999;19304166;19304285;19306018;19306018;19306018;19306018;19307002;19307002;19307002;19307314;19307314;19307739;19308158;19308158;19308158;19308455;19308455;19308455;19308455;19308455;19311827;19311827;19311827;19311827	19304386;19304386;19304386;19304386;19306147;19306147;19306147;19306147;19307101;19307101;19307101;19307410;19307410;19308262;19308262;19308262;19308262;19308642;19308505;19308642;19308642;19308642;19312103;19311907;19312094;19312146	1781	10.1146669120801	9.91891197481835	9.97644860014642	9.93281611750148	9.8222990072528	9.83483634341022	9.90014328133826	10.0404532231099	10.3348816605392	10.2571612679378	9.49353112803127	9.17277360408405	0.87311588997237	0.970209033423732	1.00872808878301	1.10214186938493	0.94755369731478	0.800649365762347
ENSG00000200403.1	RNU6-1099P	gene_type snRNA	chr1	19305076	19305182	107	3.95230142254003	3.95438272415751	3.96520609223261	3.55782624462725	4.17203110618318	4.21583248886372	3.97903344337653	3.95050242154829	4.45830789965566	3.55782624462725	3.97541602041241	3.55782624462725	1.00144368946577	0.753991493562934	1.03082639408898	0.980418068928156	0.535707851151557	0.748674345507322
ENSG00000040487.12	PQLC2	gene_type protein_coding	chr1;chr1;chr1;chr1;chr1;chr1;chr1;chr1;chr1;chr1;chr1;chr1;chr1;chr1;chr1;chr1;chr1;chr1;chr1;chr1;chr1;chr1;chr1;chr1;chr1;chr1;chr1;chr1;chr1;chr1;chr1;chr1;chr1;chr1;chr1;chr1;chr1;chr1;chr1;chr1;chr1;chr1;chr1;chr1;chr1;chr1	19312326;19312328;19312330;19312341;19312729;19312729;19312729;19312729;19317600;19317600;19317600;19324633;19324633;19324633;19324633;19324633;19324754;19325495;19325495;19325495;19325495;19325526;19325526;19326245;19326245;19326245;19326245;19326245;19326245;19326531;19326531;19326531;19326531;19326531;19326531;19327227;19327227;19327227;19327227;19327227;19327571;19328572;19328572;19328572;193…	19312358;19312889;19312358;19312358;19312889;19312889;19312889;19312889;19317841;19317841;19317841;19324762;19324762;19324762;19324762;19324762;19324762;19325582;19325582;19325582;19325582;19325582;19325582;19326387;19326387;19326387;19326387;19326387;19326387;19326623;19326623;19326623;19326623;19326623;19326623;19327412;19327412;19327412;19327412;19327412;19328081;19328987;19329300;19329284;193…	2686	7.58530936908794	7.87202767469468	7.89777317437782	7.92163384087394	7.97504514930528	8.11525112246414	7.74131685498503	7.82958481179216	8.00089951225629	8.14740663656302	7.57544060566424	7.53394565423357	1.21986230198069	1.0166764793335	1.10206244578593	1.06309310803246	1.1068863683179	0.97164758358698
ENSG00000077549.17	CAPZB	gene_type protein_coding	chr1;chr1;chr1;chr1;chr1;chr1;chr1;chr1;chr1;chr1;chr1;chr1;chr1;chr1;chr1;chr1;chr1;chr1;chr1;chr1;chr1;chr1;chr1;chr1;chr1;chr1;chr1;chr1;chr1;chr1;chr1;chr1;chr1;chr1;chr1;chr1;chr1;chr1;chr1;chr1;chr1;chr1;chr1;chr1;chr1;chr1;chr1;chr1;chr1;chr1;chr1;chr1;chr1;chr1;chr1;chr1;chr1;chr1;chr1;chr1;chr1;chr1;chr1;chr1	19338776;19338779;19338823;19339359;19339530;19342752;19344358;19344358;19344358;19344358;19345187;19345187;19345187;19345187;19345187;19356635;19356635;19356635;19356635;19356635;19356655;19357422;19357422;19357422;19357422;19357422;19357422;19357445;19357522;19374175;19378540;19378540;19378540;19378540;19378540;19378540;19378540;19378540;19378540;19385505;19385505;19385505;19385505;19385505;193…	19339617;19339617;19339617;19339617;19339617;19342864;19344434;19344434;19344434;19344434;19345252;19345252;19345252;19345252;19345252;19356751;19356751;19356751;19356751;19356751;19356751;19357563;19357563;19357563;19357563;19357563;19357563;19357563;19357563;19374455;19378653;19378653;19378653;19378653;19378653;19378653;19378653;19378653;19378653;19385626;19385626;19385626;19385626;19385626;193…	3238	11.9287556089032	11.7912189244542	11.903497597528	11.9449778048173	12.0373674673063	12.0224630925818	11.8312253615906	12.0993831271979	12.250653073101	12.1546813181631	11.641126973481	11.3414676766485	0.909070013653722	1.02916921431588	0.989722255397767	1.20426906661696	0.935641815633678	0.812444238454369
ENSG00000240490.3	RN7SL277P	gene_type misc_RNA	chr1	19424384	19424671	288	3.95230142254003	3.55782624462725	3.55782624462725	3.55782624462725	3.55782624462725	3.55782624462725	3.55782624462725	3.55782624462725	3.55782624462725	3.97475709050258	3.55782624462725	3.55782624462725	0.760766076973291	1	1	1	1.33508430584895	1
ENSG00000201609.1	RNU4-28P	gene_type snRNA	chr1	19510593	19510733	141	3.55782624462725	3.55782624462725	3.55782624462725	3.55782624462725	3.55782624462725	3.55782624462725	3.55782624462725	3.55782624462725	3.55782624462725	3.55782624462725	3.55782624462725	3.55782624462725	1	1	1	1	1	1
ENSG00000235185.1	RP5-1056L3.1	gene_type antisense	chr1;chr1	19591802;19596710	19591885;19596832	207	3.55782624462725	3.55782624462725	3.55782624462725	3.55782624462725	3.55782624462725	3.55782624462725	3.55782624462725	3.95050242154829	3.55782624462725	3.55782624462725	3.55782624462725	3.55782624462725	1	1	1	1.31282641920024	1	1
ENSG00000173436.13	MINOS1	gene_type protein_coding	chr1;chr1;chr1;chr1;chr1;chr1;chr1;chr1;chr1;chr1;chr1;chr1;chr1;chr1;chr1;chr1;chr1;chr1;chr1;chr1;chr1;chr1;chr1;chr1;chr1;chr1;chr1;chr1;chr1;chr1;chr1;chr1;chr1;chr1;chr1;chr1;chr1;chr1;chr1	19596977;19596983;19596990;19596991;19596995;19597001;19597039;19597041;19597052;19597070;19597834;19597834;19600787;19600787;19600787;19614501;19617258;19622100;19622100;19622100;19622100;19622100;19622100;19622100;19623474;19623474;19623474;19623474;19623474;19623474;19623474;19623474;19625392;19626387;19626387;19626387;19626387;19626387;19626387	19597109;19597109;19597109;19597109;19597109;19597109;19597109;19597109;19597109;19597109;19597853;19598195;19601304;19600971;19600971;19614594;19617336;19622147;19622147;19622147;19622147;19622147;19622147;19622147;19623583;19623583;19623583;19623551;19623583;19623583;19623790;19623583;19625632;19626606;19626587;19626629;19626623;19629820;19629821	5227	7.90708034148745	7.87202767469468	7.80299825969881	8.00350091919991	7.6939737927911	7.9790830313643	7.89052993801485	7.86813829143405	7.71149006880876	7.80084981224489	7.72569745284287	7.63544529573977	0.975996130568345	1.14909865078102	1.21850252325472	0.984599118746434	1.06389792824628	0.93935855191267
ENSG00000270136.5	MINOS1-NBL1	gene_type protein_coding	chr1;chr1;chr1;chr1;chr1;chr1;chr1;chr1;chr1;chr1;chr1;chr1;chr1;chr1;chr1;chr1;chr1;chr1;chr1;chr1;chr1;chr1;chr1;chr1;chr1;chr1;chr1;chr1	19596979;19597067;19597067;19597068;19600787;19617258;19622100;19622100;19623474;19623474;19626387;19626387;19634437;19634437;19640346;19640584;19655012;19655012;19655012;19655012;19655324;19655324;19655324;19655324;19656866;19656866;19656866;19656866	19597109;19597109;19597109;19597109;19600971;19617336;19622147;19622147;19623583;19623583;19626476;19626476;19634524;19634524;19640469;19640729;19655200;19655200;19655200;19655200;19655435;19655435;19655435;19655435;19656927;19656926;19656914;19658056	2493	3.55782624462725	3.55782624462725	3.55782624462725	3.55782624462725	3.55782624462725	3.55782624462725	3.55782624462725	3.55782624462725	3.55782624462725	3.55782624462725	3.55782624462725	3.55782624462725	1	1	1	1	1	1
ENSG00000226396.1	RP5-1056L3.3	gene_type processed_pseudogene	chr1	19608114	19608568	455	6.76956417833018	6.35488743564676	6.29464074070633	6.04440170050761	5.88577282417488	5.89331905803224	6.27358005950323	6.16297160194357	6.00081488708682	5.92816544459356	6.34808834918189	6.15576316329975	0.750187566512964	0.840757098635227	1.0052443544583	0.926197355176629	0.950890128000752	0.875194037256056
ENSG00000158747.13	NBL1	gene_type protein_coding	chr1;chr1;chr1;chr1;chr1;chr1;chr1;chr1;chr1;chr1;chr1;chr1;chr1;chr1;chr1;chr1;chr1;chr1;chr1;chr1;chr1;chr1;chr1;chr1;chr1;chr1;chr1;chr1;chr1;chr1;chr1;chr1;chr1;chr1;chr1;chr1;chr1;chr1;chr1;chr1;chr1;chr1;chr1;chr1;chr1;chr1;chr1;chr1;chr1;chr1;chr1	19640554;19643232;19643409;19643409;19643714;19643714;19644163;19645372;19645372;19645766;19645766;19647610;19647610;19655012;19655012;19655012;19655012;19655012;19655012;19655012;19655012;19655012;19655012;19655012;19655012;19655012;19655324;19655324;19655324;19655324;19655324;19655324;19655324;19655324;19655324;19655324;19655324;19655324;19655324;19656866;19656866;19656866;19656866;19656866;196…	19640729;19643397;19643625;19643625;19643954;19643954;19644446;19645530;19645530;19646033;19646033;19647670;19647670;19655200;19655200;19655200;19655200;19655200;19655200;19655200;19655200;19655200;19655200;19655200;19655200;19655200;19655435;19655435;19655436;19655435;19655435;19655435;19655435;19655435;19655435;19655435;19655435;19655435;19655435;19658456;19657076;19658456;19658456;19656933;196…	3465	6.67139582269676	7.12779436725254	6.47750147898021	6.81383594920152	6.98262374629002	7.07346247834924	6.82420904672618	7.23646157806711	6.33258170880632	6.60584322284009	6.8548569350738	6.90330289723766	1.37211228230591	1.26254470287586	1.0649891496767	1.33076195911399	1.20853689225728	1.03415036073247
ENSG00000158748.3	HTR6	gene_type protein_coding	chr1;chr1;chr1	19665287;19678567;19678919	19666467;19678725;19679562	1984	3.95230142254003	4.24046069271801	3.96520609223261	4.30835738787737	4.51847424846376	4.5518999672019	4.1514250525846	4.11146652358321	4.13281753800557	3.97475709050258	4.38456570337338	4.29078246946898	1.22108130976571	1.26852442269663	1.02343942756446	0.972682907272541	0.896229147663079	0.937062230653034
ENSG00000162542.13	TMCO4	gene_type protein_coding	chr1;chr1;chr1;chr1;chr1;chr1;chr1;chr1;chr1;chr1;chr1;chr1;chr1;chr1;chr1;chr1;chr1;chr1;chr1;chr1;chr1;chr1;chr1;chr1;chr1;chr1;chr1;chr1;chr1;chr1;chr1;chr1;chr1;chr1;chr1;chr1;chr1;chr1;chr1;chr1;chr1;chr1;chr1;chr1;chr1;chr1;chr1;chr1;chr1;chr1;chr1;chr1;chr1;chr1;chr1;chr1;chr1;chr1;chr1;chr1;chr1;chr1;chr1;chr1	19682213;19682240;19682242;19683288;19694434;19694434;19694434;19694492;19700768;19700768;19700768;19700768;19737372;19737372;19737372;19737372;19738222;19739824;19739824;19739824;19740777;19740777;19740777;19745532;19745532;19746456;19746456;19746456;19747163;19747163;19747163;19747163;19750081;19755634;19755634;19755634;19755634;19755634;19770542;19770542;19770542;19770542;19770542;19771308;197…	19683444;19682714;19683444;19683444;19694551;19694551;19694551;19694551;19701210;19700885;19700885;19700885;19737456;19737456;19737456;19737456;19738419;19739960;19739960;19739960;19740941;19740941;19740941;19745651;19745651;19746599;19746599;19746599;19747260;19747260;19747260;19747260;19750372;19755766;19755766;19755766;19755766;19755766;19770569;19770569;19770569;19770569;19770569;19771427;197…	4054	7.59197437736752	7.37484494793373	7.72109969543818	7.69006256886925	7.27461810437919	7.16883970806372	7.1992623826828	7.14935270813599	7.6917218660575	7.65202617242224	6.86731508182364	6.54685628228709	0.860275448701328	0.978716463611065	0.929303407980395	0.965996806964567	0.972860130282497	0.800815165371068
ENSG00000178828.6	RNF186	gene_type protein_coding	chr1	19814029	19815278	1250	3.55782624462725	3.55782624462725	3.55782624462725	3.55782624462725	3.55782624462725	3.55782624462725	3.55782624462725	3.95050242154829	3.55782624462725	3.55782624462725	3.55782624462725	3.55782624462725	1	1	1	1.31282641920024	1	1
[truncated: 63,239 more rows]

## Sheet: HSF1+, HSF1−
EnsemblGene	Gene.refGene	GeneType	Chr	Start	End	Length	HSF1+_Ctr(1)	HSF1+_Ctr(2)	HSF1+_Ctr(3)	HSF1+_E2(1)	HSF1+_E2(2)	HSF1+_E2(3)	HSF1−_Ctr(1)	HSF1−_Ctr(2)	HSF1−_Ctr(3)	HSF1−_E2(1)	HSF1−_E2(2)	HSF1−_E2(3)	mean HSF1+_Ctr	mean HSF1+_E2	mean HSF1−_Ctr	mean HSF1−_E2	folds HSF1+ E2 vs Ctr	folds HSF1− E2 vs Ctr	ttest_unpaired_p_ HSF1+ E2 vs Ctr	ttest_unpaired_p_HSF1− E2 vs Ctr	fdr_ HSF1+ E2 vs Ctr	fdr_HSF1− E2 vs Ctr
[truncated: 63,856 more rows]
