# Supplementary material for: Heat shock factor 1 (HSF1) cooperates with estrogen receptor α (ERα) in the regulation of estrogen action in breast cancer cells
Source: eLife. 2021 Nov 16;10:e69843. doi: 10.7554/eLife.69843 (PMC8709578; doi:10.7554/eLife.69843)
Supplement: Supplementary file 2. [file elife-69843-supp2.xlsx]

## Sheet: WT_Ctr
Peak ID	Chr	Start	End	Strand	Peak Score	Focus Ratio/Region Size	Annotation	Detailed Annotation	Distance to TSS	Nearest PromoterID	Entrez ID	Nearest Unigene	Nearest Refseq	Nearest Ensembl	Gene Name	Gene Alias	Gene Description	Gene Type
MACS_peak_1113	chr5	9992	11810	+	3100.00	NA	Intergenic	(CCCTAA)n|Simple_repeat|Simple_repeat	-129472	NM_052909	153478	Hs.535800	NM_052909	ENSG00000153404	PLEKHG4B	-	pleckstrin homology domain containing, family G (with RhoGef domain) member 4B	protein-coding
MACS_peak_37	chr1	31904481	31905172	+	1680.69	NA	intron (NM_001199039, intron 9 of 10)	G-rich|Low_complexity|Low_complexity	18166	NM_018565	347735	Hs.270655	NM_018565	ENSG00000168528	SERINC2	FKSG84|PRO0899|TDE2|TDE2L	serine incorporator 2	protein-coding
MACS_peak_1	chr1	9993	10566	+	1285.05	NA	Intergenic	(CCCTAA)n|Simple_repeat|Simple_repeat	-1595	NR_046018	100287102	Hs.618434	NR_046018	ENSG00000223972	DDX11L1	-	DEAD/H (Asp-Glu-Ala-Asp/His) box helicase 11 like 1	pseudo
MACS_peak_639	chr17	62792043	62793250	+	1172.78	NA	intron (NR_024386, intron 7 of 10)	(CCTA)n|Simple_repeat|Simple_repeat	-14529	NR_026899	146880	Hs.117853	NR_026899	ENSG00000215769	LOC146880	-	Rho GTPase activating protein 27 pseudogene	pseudo
MACS_peak_231	chr12	95087	95752	+	1156.06	NA	Intergenic	(TTAGGG)n|Simple_repeat|Simple_repeat	21694	NR_130745	100288778	Hs.459573	NR_130745	ENSG00000226210	LOC100288778	-	WAS protein family homolog 1 pseudogene	pseudo
MACS_peak_669	chr18	9990	10723	+	1048.85	NA	Intergenic	(CCCTAA)n|Simple_repeat|Simple_repeat	-1719	NR_110795	102723376	Hs.606852	NR_110795		LOC102723376	-	uncharacterized LOC102723376	ncRNA
MACS_peak_1506	chr9	139851048	139852080	+	1038.70	NA	Intergenic	(TGGA)n|Simple_repeat|Simple_repeat	4796	NM_178536	286256	Hs.440519	NM_178536	ENSG00000184925	LCN12	-	lipocalin 12	protein-coding
MACS_peak_148	chr10	117424202	117424646	+	838.06	NA	intron (NM_207303, intron 26 of 28)	intron (NM_207303, intron 26 of 28)	571300	NM_001276282	26033	Hs.501127	NM_207303	ENSG00000107518	ATRNL1	ALP|bA338L11.1|bA454H24.1	attractin-like 1	protein-coding
MACS_peak_962	chr21	46575464	46576531	+	766.38	NA	intron (NR_027673, intron 3 of 12)	(TCCA)n|Simple_repeat|Simple_repeat	81504	NM_015834	104	Hs.474018	NM_001112	ENSG00000197381	ADARB1	ADAR2|DRABA2|DRADA2|RED1	adenosine deaminase, RNA-specific, B1	protein-coding
MACS_peak_586	chr16	89046190	89047465	+	677.41	NA	Intergenic	(TGGA)n|Simple_repeat|Simple_repeat	-3323	NM_005187	863	Hs.513811	NM_005187	ENSG00000129993	CBFA2T3	ETO2|MTG16|MTGR2|ZMYND4	core-binding factor, runt domain, alpha subunit 2; translocated to, 3	protein-coding
MACS_peak_1070	chr4	9998	10319	+	647.57	NA	Intergenic	(CCCTAA)n|Simple_repeat|Simple_repeat	-43021	NM_001286053	152687	Hs.709469	NM_182524	ENSG00000272602	ZNF595	-	zinc finger protein 595	protein-coding
MACS_peak_643	chr17	64794415	64795807	+	645.31	NA	intron (NM_002737, intron 16 of 16)	(TGG)n|Simple_repeat|Simple_repeat	11921	NR_030364	693219		NR_030364	ENSG00000207943	MIR634	MIRN634|hsa-mir-634	microRNA 634	ncRNA
MACS_peak_1504	chr9	139016794	139017594	+	635.58	NA	Intergenic	(TTGG)n|Simple_repeat|Simple_repeat	-6463	NM_152833	90120	Hs.287411	NM_152833	ENSG00000238227	C9orf69	bA83N9.1	chromosome 9 open reading frame 69	protein-coding
MACS_peak_272	chr12	116828147	116828589	+	554.91	NA	Intergenic	MIRb|SINE|MIR	37755	NR_039683	100616309		NR_039683	ENSG00000264037	MIR4472-2	-	microRNA 4472-2	ncRNA
MACS_peak_935	chr20	62917994	62918993	+	545.74	NA	Intergenic	(TTAGGG)n|Simple_repeat|Simple_repeat	-3245	NR_040415	140849	Hs.745565	NR_040415		LINC00266-1	C20orf69|NCRNA00266|NCRNA00266-1|bA476I15.3	long intergenic non-protein coding RNA 266-1	ncRNA
MACS_peak_921	chr20	61072591	61074156	+	539.44	NA	Intergenic	(TGGG)n|Simple_repeat|Simple_repeat	-22347	NM_080473	140628	Hs.352250	NM_080473	ENSG00000130700	GATA5	GATAS|bB379O24.1	GATA binding protein 5	protein-coding
MACS_peak_972	chr21	47731478	47732256	+	532.71	NA	intron (NM_001286476, intron 5 of 8)	(CCCA)n|Simple_repeat|Simple_repeat	6267	NM_001286463	54058	Hs.236572	NM_058180	ENSG00000160298	C21orf58	-	chromosome 21 open reading frame 58	protein-coding
MACS_peak_675	chr18	13822898	13824112	+	513.21	NA	Intergenic	Intergenic	-2038	NM_005913	4161	Hs.248145	NM_005913	ENSG00000176136	MC5R	MC2	melanocortin 5 receptor	protein-coding
MACS_peak_1431	chr9	96433848	96435017	+	489.12	NA	intron (NM_005392, intron 17 of 21)	intron (NM_005392, intron 17 of 21)	77309	NR_049853	100847045		NR_049853		MIR548AU	-	microRNA 548au	ncRNA
MACS_peak_964	chr21	46920331	46921001	+	481.24	NA	intron (NM_130444, intron 31 of 41)	(GTGTG)n|Simple_repeat|Simple_repeat	22486	NR_106873	102465489		NR_106873	ENSG00000275167	MIR6815	hsa-mir-6815	microRNA 6815	ncRNA
MACS_peak_898	chr20	57318684	57319887	+	475.97	NA	Intergenic	(TGGG)n|Simple_repeat|Simple_repeat	51423	NM_024663	79716	Hs.654868	NM_024663	ENSG00000215440	NPEPL1	bA261P9.2	aminopeptidase-like 1	protein-coding
MACS_peak_1252	chr7	9993	10245	+	460.07	NA	Intergenic	(CCCTAA)n|Simple_repeat|Simple_repeat	-139599	NR_108065	100507642	Hs.557780	NR_108064		LOC100507642	-	uncharacterized LOC100507642	ncRNA
MACS_peak_289	chr12	124823487	124824440	+	459.85	NA	intron (NM_001077261, intron 38 of 47)	(CCTA)n|Simple_repeat|Simple_repeat	-2175	NR_106940	102466204		NR_106940	ENSG00000275967	MIR6880	hsa-mir-6880	microRNA 6880	ncRNA
MACS_peak_1068	chr3	197899537	197900980	+	430.89	NA	intron (NM_001145248, intron 6 of 6)	(TTAGGG)n|Simple_repeat|Simple_repeat	21021	NM_001145248	728262	Hs.744675	NM_001145248		FAM157A	-	family with sequence similarity 157, member A	protein-coding
MACS_peak_583	chr16	88586564	88587472	+	429.80	NA	intron (NM_153813, intron 4 of 9)	(TGGA)n|Simple_repeat|Simple_repeat	-49771	NM_144604	124245	Hs.93670	NM_144604	ENSG00000158545	ZC3H18	NHN1	zinc finger CCCH-type containing 18	protein-coding
MACS_peak_627	chr17	43526584	43527614	+	428.72	NA	intron (NR_027774, intron 7 of 10).2	(CCTA)n|Simple_repeat|Simple_repeat	-16817	NM_174919	201176	Hs.205326	NM_174919	ENSG00000159314	ARHGAP27	CAMGAP1|PP905|SH3D20|SH3P20	Rho GTPase activating protein 27	protein-coding
MACS_peak_1151	chr5	105577140	105577691	+	412.46	NA	Intergenic	LTR40b|LTR|ERVL	769300	NR_104671	102467213	Hs.570923	NR_104671	ENSG00000251027	LOC102467213	-	uncharacterized LOC102467213	ncRNA
MACS_peak_894	chr20	56572648	56573294	+	403.73	NA	Intergenic	(GGTTG)n|Simple_repeat|Simple_repeat	102521	NR_039757	100616353		NR_039757	ENSG00000263453	MIR4532	mir-4532	microRNA 4532	ncRNA
MACS_peak_963	chr21	46760257	46760712	+	398.76	NA	intron (NR_103811, intron 1 of 1)	(TCCA)n|Simple_repeat|Simple_repeat	1421	NR_103811	388830	Hs.592162	NR_103811	ENSG00000237664	LINC00316	C21orf111|NCRNA00316|PRED59	long intergenic non-protein coding RNA 316	ncRNA
MACS_peak_547	chr16	84388441	84389198	+	397.31	NA	Intergenic	(TGGA)n|Simple_repeat|Simple_repeat	-13310	NM_014861	9914	Hs.6168	NM_014861	ENSG00000064270	ATP2C2	SPCA2	ATPase, Ca++ transporting, type 2C, member 2	protein-coding
MACS_peak_1491	chr9	137576753	137577577	+	394.76	NA	intron (NM_000093, intron 1 of 65)	(TCCA)n|Simple_repeat|Simple_repeat	43514	NM_000093	1289	Hs.210283	NM_000093	ENSG00000130635	COL5A1	EDSC	collagen, type V, alpha 1	protein-coding
MACS_peak_623	chr17	38478543	38478898	+	394.26	NA	intron (NM_001145302, intron 1 of 6)	intron (NM_001145302, intron 1 of 6)	4247	NM_001145301	5914	Hs.654583	NM_000964	ENSG00000131759	RARA	NR1B1|RAR	retinoic acid receptor, alpha	protein-coding
MACS_peak_1377	chr8	129154055	129154610	+	387.62	NA	Intergenic	Intergenic	-8030	NR_031613	100302281		NR_031613	ENSG00000221261	MIR1208	MIRN1208|hsa-mir-1208	microRNA 1208	ncRNA
MACS_peak_883	chr20	50993654	50994422	+	387.56	NA	Intergenic	Intergenic	-185514	NM_199427	55734	Hs.473082	NM_018197	ENSG00000020256	ZFP64	ZNF338	ZFP64 zinc finger protein	protein-coding
MACS_peak_1321	chr7	132001780	132002345	+	385.44	NA	intron (NM_020911, intron 3 of 31)	(GGTTG)n|Simple_repeat|Simple_repeat	259261	NM_020911	91584	Hs.511454	NM_020911	ENSG00000221866	PLXNA4	FAYV2820|PLEXA4|PLXNA4A|PLXNA4B|PRO34003	plexin A4	protein-coding
MACS_peak_1138	chr5	31364023	31364587	+	373.56	NA	Intergenic	(TTGG)n|Simple_repeat|Simple_repeat	167977	NM_013235	29102	Hs.97997	NM_013235	ENSG00000113360	DROSHA	ETOHI2|HSA242976|RANSE3L|RN3|RNASE3L|RNASEN	drosha, ribonuclease type III	protein-coding
MACS_peak_448	chr15	101682056	101682839	+	373.28	NA	Intergenic	(TCCA)n|Simple_repeat|Simple_repeat	109690	NM_014918	22856	Hs.110488	NM_014918	ENSG00000131873	CHSY1	CHSY|CSS1|ChSy-1|TPBS	chondroitin sulfate synthase 1	protein-coding
MACS_peak_91	chr1	243643735	243644285	+	370.34	NA	intron (NM_006642, intron 16 of 17)	(TGGA)n|Simple_repeat|Simple_repeat	134532	NR_039824	100616343		NR_039824	ENSG00000265201	MIR4677	mir-4677	microRNA 4677	ncRNA
MACS_peak_877	chr20	49974148	49974972	+	366.00	NA	Intergenic	(TGGA)n|Simple_repeat|Simple_repeat	94954	NR_036162	100422889		NR_036162	ENSG00000266761	MIR3194	mir-3194	microRNA 3194	ncRNA
MACS_peak_834	chr2	238425801	238426477	+	365.04	NA	intron (NM_024101, intron 4 of 15)	(TGGA)n|Simple_repeat|Simple_repeat	6565	NR_106869	102465486		NR_106869	ENSG00000277842	MIR6811	hsa-mir-6811	microRNA 6811	ncRNA
MACS_peak_845	chr20	20317916	20318286	+	363.05	NA	intron (NM_015585, intron 25 of 26)	(TGGA)n|Simple_repeat|Simple_repeat	-30664	NM_002196	3642	Hs.89584	NM_002196	ENSG00000173404	INSM1	IA-1|IA1	insulinoma-associated 1	protein-coding
MACS_peak_902	chr20	58213186	58214332	+	358.61	NA	intron (NM_001281507, intron 1 of 12)	(TGGA)n|Simple_repeat|Simple_repeat	10095	NM_001281507	116154	Hs.473218	NM_080672	ENSG00000087495	PHACTR3	C20orf101|H17739|PPP1R123|SCAPIN1|SCAPININ	phosphatase and actin regulator 3	protein-coding
MACS_peak_261	chr12	108999407	109000063	+	358.54	NA	Intergenic	(TGGG)n|Simple_repeat|Simple_repeat	-7841	NM_181724	338773	Hs.449718	NM_181724	ENSG00000183160	TMEM119	OBIF	transmembrane protein 119	protein-coding
MACS_peak_587	chr16	89077425	89078613	+	354.76	NA	Intergenic	(CCCA)n|Simple_repeat|Simple_repeat	-34515	NM_005187	863	Hs.513811	NM_005187	ENSG00000129993	CBFA2T3	ETO2|MTG16|MTGR2|ZMYND4	core-binding factor, runt domain, alpha subunit 2; translocated to, 3	protein-coding
MACS_peak_838	chr2	243152474	243152925	+	354.66	NA	Intergenic	(CCCGAA)n|Simple_repeat|Simple_repeat	121915	NR_130702	728323	Hs.380737	NR_024437		LOC728323	-	uncharacterized LOC728323	ncRNA
MACS_peak_617	chr17	21310392	21311504	+	352.71	NA	intron (NM_001194958, intron 1 of 2)	(TCCA)n|Simple_repeat|Simple_repeat	2500	NM_001194958	100134444	Hs.200629	NM_001194958	ENSG00000260458	KCNJ18	KIR2.6|TTPP2	potassium channel, inwardly rectifying subfamily J, member 18	protein-coding
MACS_peak_217	chr11	76483608	76484064	+	351.09	NA	Intergenic	Intergenic	-9521	NM_001258210	25987	Hs.8361	NM_015516	ENSG00000182704	TSKU	E2IG4|LRRC54|TSK	tsukushi, small leucine rich proteoglycan	protein-coding
MACS_peak_640	chr17	62937045	62937563	+	348.56	NA	Intergenic	(TGGG)n|Simple_repeat|Simple_repeat	-21706	NM_001303255	374819	Hs.551962	NM_199340	ENSG00000176809	LRRC37A3	LRRC37|LRRC37A	leucine rich repeat containing 37, member A3	protein-coding
MACS_peak_576	chr16	88467745	88468614	+	346.48	NA	Intergenic	(TGGA)n|Simple_repeat|Simple_repeat	-25700	NM_001127464	84627	Hs.54925	NM_001127464	ENSG00000225614	ZNF469	BCS|BCS1	zinc finger protein 469	protein-coding
MACS_peak_904	chr20	58889345	58890020	+	345.91	NA	intron (NR_046099, intron 3 of 4)	(TCCA)n|Simple_repeat|Simple_repeat	6150	NR_030376	693231		NR_030376	ENSG00000207802	MIR646	MIRN646|hsa-mir-646	microRNA 646	ncRNA
MACS_peak_651	chr17	75211790	75212550	+	336.64	NA	3' UTR (NM_001143999, exon 17 of 17)	3' UTR (NM_001143999, exon 17 of 17)	30875	NM_001144001	6397	Hs.464184	NM_003003	ENSG00000129657	SEC14L1	PRELID4A|SEC14L	SEC14-like lipid binding 1	protein-coding
MACS_peak_836	chr2	242838510	242839020	+	336.64	NA	intron (NR_110220, intron 2 of 3)	G-rich|Low_complexity|Low_complexity	15251	NR_110220	101927289	Hs.130180	NR_110220	ENSG00000233806	LINC01237	-	long intergenic non-protein coding RNA 1237	ncRNA
MACS_peak_941	chr21	33156941	33157472	+	335.99	NA	Intergenic	(CCA)n|Simple_repeat|Simple_repeat	-52775	NM_001145444	57466	Hs.17255	NM_020706	ENSG00000156304	SCAF4	SFRS15|SRA4	SR-related CTD-associated factor 4	protein-coding
MACS_peak_174	chr11	46638667	46639210	+	333.96	NA	promoter-TSS (NM_173811)	promoter-TSS (NM_173811)	112	NM_001142673	9776	Hs.127403	NM_014741	ENSG00000175224	ATG13	KIAA0652|PARATARG8	autophagy related 13	protein-coding
MACS_peak_969	chr21	47712373	47713499	+	330.89	NA	TTS (NM_001006114)	TTS (NM_001006114)	6692	NM_001314024	54059	Hs.474066	NM_058181	ENSG00000182362	YBEY	C21orf57	ybeY metallopeptidase (putative)	protein-coding
MACS_peak_757	chr2	11638619	11639083	+	327.56	NA	Intergenic	Intergenic	-32548	NM_001278277	1876	Hs.603093	NM_198256	ENSG00000169016	E2F6	E2F-6	E2F transcription factor 6	protein-coding
MACS_peak_746	chr2	2239826	2240471	+	326.19	NA	intron (NM_015025, intron 2 of 24)	(CAACC)n|Simple_repeat|Simple_repeat	-82856	NR_024468	730811	Hs.629472	NR_024468	ENSG00000225619	MYT1L-AS1	-	MYT1L antisense RNA 1	ncRNA
MACS_peak_385	chr14	105151757	105152914	+	324.86	NA	Intergenic	(TGGG)n|Simple_repeat|Simple_repeat	-3608	NM_032714	64423	Hs.24956	NM_022489	ENSG00000203485	INF2	C14orf151|C14orf173|CMTDIE|FSGS5|pp9484	inverted formin, FH2 and WH2 domain containing	protein-coding
MACS_peak_642	chr17	63495943	63496574	+	321.58	NA	Intergenic	(TGG)n|Simple_repeat|Simple_repeat	42599	NR_131984	105827617		NR_131984		CRAT40	-	cervical cancer-associated transcript 40	ncRNA
MACS_peak_253	chr12	75265559	75266071	+	320.89	NA	Intergenic	Intergenic	334264	NM_001136262	552889	Hs.744849	NM_001136262		ATXN7L3B	lnc-SCA7	ataxin 7-like 3B	protein-coding
MACS_peak_1251	chr6	170461222	170461736	+	319.94	NA	Intergenic	Intergenic	-14387	NR_125878	102724511	Hs.550045	NR_125878		LOC102724511	-	uncharacterized LOC102724511	ncRNA
MACS_peak_522	chr16	30968711	30969413	+	315.69	NA	5' UTR (NM_014712, exon 1 of 19)	5' UTR (NM_014712, exon 1 of 19)	447	NM_014712	9739	Hs.297483	NM_014712	ENSG00000099381	SETD1A	KMT2F|Set1|Set1A	SET domain containing 1A	protein-coding
MACS_peak_386	chr14	105290552	105291373	+	313.41	NA	TTS (NR_024396)	TTS (NR_024396)	3424	NR_024396	196872	Hs.352220	NR_024396	ENSG00000258701	LINC00638	-	long intergenic non-protein coding RNA 638	ncRNA
MACS_peak_897	chr20	57094791	57095464	+	307.30	NA	intron (NR_034147, intron 2 of 6)	(TGGG)n|Simple_repeat|Simple_repeat	4692	NR_034147	149773	Hs.685214	NR_034147	ENSG00000231290	APCDD1L-AS1	-	APCDD1L antisense RNA 1 (head to head)	ncRNA
MACS_peak_763	chr2	28600013	28600430	+	299.43	NA	Intergenic	Intergenic	-15558	NM_005253	2355	Hs.220971	NM_005253	ENSG00000075426	FOSL2	FRA2	FOS-like antigen 2	protein-coding
MACS_peak_1494	chr9	137680059	137680933	+	295.11	NA	intron (NM_000093, intron 31 of 65)	(TAGA)n|Simple_repeat|Simple_repeat	60719	NR_039691	100616333		NR_039691	ENSG00000264744	MIR3689C	-	microRNA 3689c	ncRNA
MACS_peak_517	chr16	29208958	29209493	+	293.95	NA	Intergenic	(TGGA)n|Simple_repeat|Simple_repeat	-104383	NR_002939	440352	Hs.658149	NR_002939		SNX29P2	RUNDC2C	sorting nexin 29 pseudogene 2	pseudo
MACS_peak_633	chr17	55208427	55209797	+	293.02	NA	Intergenic	G-rich|Low_complexity|Low_complexity	45977	NM_001242902	8165	Hs.463506	NM_003488	ENSG00000121057	AKAP1	AKAP|AKAP121|AKAP149|AKAP84|D-AKAP1|PPP1R43|PRKA1|SAKAP84|TDRD17	A kinase (PRKA) anchor protein 1	protein-coding
MACS_peak_662	chr17	79398659	79399283	+	291.20	NA	intron (NM_001291324, intron 1 of 27)	HAL1-2a_MD|LINE|L1	19243	NR_036152	100422944		NR_036152	ENSG00000266189	MIR3186	mir-3186	microRNA 3186	ncRNA
MACS_peak_577	chr16	88488300	88489514	+	291.18	NA	Intergenic	(TGGA)n|Simple_repeat|Simple_repeat	-4972	NM_001127464	84627	Hs.54925	NM_001127464	ENSG00000225614	ZNF469	BCS|BCS1	zinc finger protein 469	protein-coding
MACS_peak_183	chr11	65266835	65268088	+	288.88	NA	non-coding (NR_002819, exon 1 of 1)	non-coding (NR_002819, exon 1 of 1)	2228	NR_002819	378938	Hs.621695	NR_002819	ENSG00000251562	MALAT1	HCN|LINC00047|NCRNA00047|NEAT2|PRO2853|mascRNA	metastasis associated lung adenocarcinoma transcript 1 (non-protein coding)	ncRNA
MACS_peak_554	chr16	85421274	85421917	+	285.21	NA	Intergenic	(TGGA)n|Simple_repeat|Simple_repeat	-81664	NR_049816	100847022		NR_049816	ENSG00000266307	MIR5093	-	microRNA 5093	ncRNA
MACS_peak_1358	chr8	101438646	101439166	+	284.63	NA	Intergenic	(CCA)n|Simple_repeat|Simple_repeat	43915	NR_039681	100616451		NR_039681	ENSG00000265599	MIR4471	-	microRNA 4471	ncRNA
MACS_peak_598	chr17	4365806	4366259	+	282.77	NA	intron (NM_182538, intron 8 of 11)	(TCCA)n|Simple_repeat|Simple_repeat	28813	NM_182538	201305	Hs.657543	NM_182538	ENSG00000182557	SPNS3	-	spinster homolog 3 (Drosophila)	protein-coding
MACS_peak_1334	chr7	158152744	158153096	+	281.14	NA	intron (NM_130842, intron 1 of 21)	C-rich|Low_complexity|Low_complexity	172585	NR_030325	693180		NR_030325	ENSG00000207637	MIR595	MIRN595|hsa-mir-595	microRNA 595	ncRNA
MACS_peak_154	chr10	134177800	134178039	+	278.94	NA	intron (NM_001309474, intron 8 of 9)	C-rich|Low_complexity|Low_complexity	27308	NM_001309474	80313	Hs.119897	NM_030626	ENSG00000148814	LRRC27	-	leucine rich repeat containing 27	protein-coding
MACS_peak_194	chr11	69628243	69628716	+	275.41	NA	intron (NM_005247, intron 2 of 2)	(TGGA)n|Simple_repeat|Simple_repeat	5713	NM_005247	2248	Hs.37092	NM_005247		FGF3	HBGF-3|INT2	fibroblast growth factor 3	protein-coding
MACS_peak_1062	chr3	196421383	196422013	+	272.17	NA	Intergenic	(CA)n|Simple_repeat|Simple_repeat	17467	NM_032898	84984	Hs.282800	NM_032898	ENSG00000174007	CEP19	C3orf34|MOSPGF	centrosomal protein 19kDa	protein-coding
MACS_peak_372	chr14	101711668	101712300	+	270.14	NA	Intergenic	Intergenic	162275	NR_126006	338002	Hs.124848	NR_126006	ENSG00000259023	LINC00524	C14orf71	long intergenic non-protein coding RNA 524	ncRNA
MACS_peak_1404	chr8	144751548	144751920	+	268.18	NA	Intergenic	LTR10B1|LTR|ERV1	-14888	NM_001288809	286075	Hs.521922	NM_173831	ENSG00000181135	ZNF707	-	zinc finger protein 707	protein-coding
MACS_peak_1315	chr7	105373915	105374503	+	267.04	NA	intron (NM_020725, intron 3 of 11)	(TCCA)n|Simple_repeat|Simple_repeat	-54600	NM_138495	222255	Hs.745056	NM_020725	ENSG00000146776	ATXN7L1	ATXN7L4	ataxin 7-like 1	protein-coding
MACS_peak_1185	chr5	173957329	173958100	+	266.09	NA	Intergenic	Intergenic	-193861	NM_002449	4488	Hs.89404	NM_002449	ENSG00000120149	MSX2	CRS2|FPP|HOX8|MSH|PFM|PFM1	msh homeobox 2	protein-coding
MACS_peak_695	chr19	18406196	18406921	+	265.58	NA	Intergenic	(TCCA)n|Simple_repeat|Simple_repeat	13671	NR_036155	100422833		NR_036155	ENSG00000267959	MIR3188	mir-3188	microRNA 3188	ncRNA
MACS_peak_1209	chr6	1205347	1206076	+	264.46	NA	Intergenic	Intergenic	-104144	NR_027115	285768	Hs.209463	NR_027115		LINC01622	-	long intergenic non-protein coding RNA 1622	ncRNA
MACS_peak_78	chr1	200509397	200509978	+	261.90	NA	Intergenic	(TCCA)n|Simple_repeat|Simple_repeat	78279	NM_001305792	9928	Hs.3104	NM_014875	ENSG00000118193	KIF14	MKS12	kinesin family member 14	protein-coding
MACS_peak_510	chr16	26385358	26386292	+	259.52	NA	Intergenic	(TGGA)n|Simple_repeat|Simple_repeat	682478	NM_006040	9951	Hs.655275	NM_006040	ENSG00000182601	HS3ST4	3-OST-4|30ST4|3OST4|h3-OST-4	heparan sulfate (glucosamine) 3-O-sulfotransferase 4	protein-coding
MACS_peak_984	chr22	49016400	49016922	+	258.97	NA	intron (NM_015381, intron 1 of 3)	(CCCA)n|Simple_repeat|Simple_repeat	44543	NM_015381	25817	Hs.436854	NM_015381	ENSG00000219438	FAM19A5	QLLK5208|TAFA-5|TAFA5|UNQ5208	family with sequence similarity 19 (chemokine (C-C motif)-like), member A5	protein-coding
MACS_peak_596	chr17	900126	900485	+	256.60	NA	promoter-TSS (NM_013337)	promoter-TSS (NM_013337)	-52	NM_013337	29928	Hs.745034	NM_013337		TIMM22	TEX4|TIM22	translocase of inner mitochondrial membrane 22 homolog (yeast)	protein-coding
MACS_peak_495	chr16	16097257	16097733	+	254.46	NA	intron (NM_004996, intron 1 of 30)	(TGGA)n|Simple_repeat|Simple_repeat	54061	NM_004996	4363	Hs.391464	NM_004996	ENSG00000103222	ABCC1	ABC29|ABCC|GS-X|MRP|MRP1	ATP binding cassette subfamily C member 1	protein-coding
MACS_peak_1336	chr7	158153398	158153815	+	254.32	NA	intron (NM_130842, intron 1 of 21)	intron (NM_130842, intron 1 of 21)	171899	NR_030325	693180		NR_030325	ENSG00000207637	MIR595	MIRN595|hsa-mir-595	microRNA 595	ncRNA
MACS_peak_1510	chr9	140463715	140464688	+	253.07	NA	intron (NM_138778, intron 5 of 8)	(TCCA)n|Simple_repeat|Simple_repeat	9186	NM_138778	92715	Hs.292570	NM_138778	ENSG00000148399	DPH7	C9orf112|RRT2|WDR85	diphthamide biosynthesis 7	protein-coding
MACS_peak_117	chr10	6060816	6061275	+	248.86	NA	intron (NM_001308242, intron 5 of 6)	(CCAA)n|Simple_repeat|Simple_repeat	-40895	NM_001243539	3601	Hs.445124	NM_002189	ENSG00000134470	IL15RA	CD215	interleukin 15 receptor, alpha	protein-coding
MACS_peak_155	chr10	134178129	134178383	+	248.78	NA	intron (NM_001309474, intron 8 of 9)	C-rich|Low_complexity|Low_complexity	27645	NM_001309474	80313	Hs.119897	NM_030626	ENSG00000148814	LRRC27	-	leucine rich repeat containing 27	protein-coding
MACS_peak_536	chr16	80776090	80776977	+	248.12	NA	intron (NM_152342, intron 1 of 6)	(TGGA)n|Simple_repeat|Simple_repeat	61642	NM_152342	124359	Hs.60257	NM_152342	ENSG00000166446	CDYL2	PCCP1	chromodomain protein, Y-like 2	protein-coding
MACS_peak_1140	chr5	43066912	43067321	+	247.59	NA	promoter-TSS (NR_034127)	promoter-TSS (NR_034127)	-9	NR_102752	100506639	Hs.666493	NR_102752		LOC100506639	-	uncharacterized LOC100506639	ncRNA
MACS_peak_205	chr11	70651956	70652340	+	245.59	NA	intron (NM_012309, intron 10 of 22)	intron (NM_012309, intron 10 of 22)	-56747	NR_073536	220070	Hs.326766	NM_145308	ENSG00000171671	SHANK2-AS3	C11orf76	SHANK2 antisense RNA 3	ncRNA
MACS_peak_491	chr16	12475062	12475802	+	244.25	NA	intron (NM_032167, intron 16 of 20)	(CCCA)n|Simple_repeat|Simple_repeat	-338746	NR_039869	100616195		NR_039869	ENSG00000264733	MIR4718	-	microRNA 4718	ncRNA
MACS_peak_1398	chr8	143824696	143825362	+	244.14	NA	Intergenic	(TGGA)n|Simple_repeat|Simple_repeat	-1200	NM_020427	57152	Hs.103505	NM_020427	ENSG00000126233	SLURP1	ANUP|ARS|ArsB|LY6LS|MDM	secreted LY6/PLAUR domain containing 1	protein-coding
MACS_peak_330	chr13	36531991	36532431	+	243.97	NA	intron (NM_004734, intron 3 of 17)	(CCA)n|Simple_repeat|Simple_repeat	-16829	NR_031646	100302239		NR_031646	ENSG00000221348	MIR548F5	MIR548F-5|MIRN548F5|hsa-mir-548f-5	microRNA 548f-5	ncRNA
MACS_peak_1133	chr5	14308342	14309283	+	242.81	NA	intron (NM_007118, intron 8 of 56)	(TCCA)n|Simple_repeat|Simple_repeat	164983	NM_007118	7204	Hs.130031	NM_007118	ENSG00000038382	TRIO	ARHGEF23|tgat	trio Rho guanine nucleotide exchange factor	protein-coding
MACS_peak_1305	chr7	98408710	98409256	+	241.18	NA	Intergenic	(TGG)n|Simple_repeat|Simple_repeat	58690	NM_001134451	222865	Hs.270753	NM_152913	ENSG00000166448	TMEM130	-	transmembrane protein 130	protein-coding
MACS_peak_715	chr19	41427001	41427466	+	239.49	NA	Intergenic	Intergenic	-2937	NR_001278	1556	Hs.529117	NR_001278	ENSG00000256612	CYP2B7P	CYP2B|CYP2B7|CYP2B7P1	cytochrome P450, family 2, subfamily B, polypeptide 7, pseudogene	pseudo
MACS_peak_1520	chrUn_gl000227	73685	74149	+	239.20	NA	intron (NR_109817, intron 1 of 2).2	(CCCTAA)n|Simple_repeat|Simple_repeat	328	NR_109817	441123		NR_109817	ENSG00000170590	LINC00266-3	C6orf88|NCRNA00266-3|NCRNA00266C|dJ24O22.2	long intergenic non-protein coding RNA 266-3	ncRNA
MACS_peak_497	chr16	16265751	16266493	+	239.20	NA	intron (NM_001171, intron 21 of 30)	(TGGA)n|Simple_repeat|Simple_repeat	51206	NM_001171	368	Hs.442182	NM_001171	ENSG00000091262	ABCC6	ABC34|ARA|EST349056|GACI2|MLP1|MOAT-E|MOATE|MRP6|PXE|PXE1|URG7	ATP binding cassette subfamily C member 6	protein-coding
MACS_peak_1517	chr9	141127303	141127890	+	237.38	NA	intron (NM_001145249, intron 6 of 6)	(TTAGGG)n|Simple_repeat|Simple_repeat	20959	NM_001145249	100132403	Hs.741123	NM_001145249		FAM157B	-	family with sequence similarity 157, member B	protein-coding
MACS_peak_1532	chrX	152080210	152080520	+	236.49	NA	Intergenic	(CATCC)n|Simple_repeat|Simple_repeat	-2621	NM_001178106	7739	Hs.16622	NM_007150	ENSG00000147394	ZNF185	-	zinc finger protein 185 (LIM domain)	protein-coding
MACS_peak_28	chr1	19252152	19252611	+	235.47	NA	intron (NM_001136265, intron 1 of 8)	(TGGA)n|Simple_repeat|Simple_repeat	-23088	NM_003748	8659	Hs.77448	NM_003748	ENSG00000159423	ALDH4A1	ALDH4|P5CD|P5CDh	aldehyde dehydrogenase 4 family, member A1	protein-coding
MACS_peak_187	chr11	68783869	68784450	+	230.24	NA	intron (NR_120541, intron 5 of 5)	(TCCA)n|Simple_repeat|Simple_repeat	-3309	NM_001098515	116535	Hs.118513	NM_145015	ENSG00000172935	MRGPRF	GPR140|GPR168|MRGF|RTA	MAS-related GPR, member F	protein-coding
MACS_peak_932	chr20	62324790	62325179	+	228.87	NA	intron (NM_016434, intron 30 of 34)	(CCA)n|Simple_repeat|Simple_repeat	-3020	NM_003823	8771	Hs.434878	NM_003823	ENSG00000243509	TNFRSF6B	DCR3|DJ583P15.1.1|M68|M68E|TR6	tumor necrosis factor receptor superfamily, member 6b, decoy	protein-coding
MACS_peak_629	chr17	45144624	45145083	+	228.35	NA	Intergenic	HERVIP10FH-int|LTR|ERV1	-24774	NM_001288811	51326	Hs.559259	NM_016632	ENSG00000185829	ARL17A	ARF1P2|ARL17P1	ADP-ribosylation factor like GTPase 17A	protein-coding
MACS_peak_572	chr16	88305462	88306160	+	226.89	NA	Intergenic	(TGGA)n|Simple_repeat|Simple_repeat	77924	NR_110944	101928880	Hs.634835	NR_110944	ENSG00000260420	LOC101928880	LA16c-444G7.2	uncharacterized LOC101928880	ncRNA
MACS_peak_356	chr14	91623216	91623731	+	226.69	NA	intron (NM_001286470, intron 4 of 16)	(TGGA)n|Simple_repeat|Simple_repeat	30703	NR_003709	100124539	Hs.693444	NR_003709	ENSG00000221102	SNORA11B	-	small nucleolar RNA, H/ACA box 11B	snoRNA
MACS_peak_1021	chr3	99536319	99536719	+	226.01	NA	promoter-TSS (NM_032359)	promoter-TSS (NM_032359)	-159	NM_032359	84319	Hs.581320	NM_032359	ENSG00000184220	CMSS1	C3orf26	cms1 ribosomal small subunit homolog (yeast)	protein-coding
MACS_peak_1466	chr9	133061848	133062551	+	225.60	NA	intron (NM_001291815, intron 8 of 86)	(CCCA)n|Simple_repeat|Simple_repeat	34041	NM_001291815	256158	Hs.32194	NM_144655	ENSG00000148357	HMCN2	-	hemicentin 2	protein-coding
MACS_peak_391	chr14	105987137	105987737	+	224.11	NA	Intergenic	Intergenic	-5516	NM_025268	80757	Hs.157527	NM_025268	ENSG00000184986	TMEM121	hole	transmembrane protein 121	protein-coding
MACS_peak_914	chr20	60556735	60557856	+	223.85	NA	intron (NM_003185, intron 14 of 14)	intron (NM_003185, intron 14 of 14)	-28577	NR_031658	100302168		NR_031658	ENSG00000221417	MIR1257	MIRN1257|hsa-mir-1257	microRNA 1257	ncRNA
MACS_peak_312	chr12	132195273	132195690	+	220.57	NA	promoter-TSS (NM_001261411)	promoter-TSS (NM_001261411)	-151	NM_004592	6433	Hs.308171	NM_004592	ENSG00000061936	SFSWAP	SFRS8|SWAP	splicing factor, suppressor of white-apricot family	protein-coding
MACS_peak_1511	chr9	140610424	140611009	+	220.33	NA	intron (NM_001145527, intron 2 of 15)	(TGG)n|Simple_repeat|Simple_repeat	-46758	NR_024341	643210	Hs.721002	NM_001039765	ENSG00000281796	EHMT1-IT1	-	EHMT1 intronic transcript 1	ncRNA
MACS_peak_611	chr17	19107348	19107782	+	219.25	NA	Intergenic	(TGGG)n|Simple_repeat|Simple_repeat	-15130	NM_001291904	79999	Hs.677375	NM_024934		LOC79999	-	uncharacterized LOC79999	protein-coding
MACS_peak_313	chr12	132345368	132345761	+	217.39	NA	Intergenic	Intergenic	32623	NM_016155	4326	Hs.709245	NM_016155	ENSG00000198598	MMP17	MT4-MMP	matrix metallopeptidase 17 (membrane-inserted)	protein-coding
MACS_peak_1139	chr5	35113316	35113744	+	217.28	NA	intron (NR_037910, intron 1 of 7)	(TCCA)n|Simple_repeat|Simple_repeat	4694	NM_001204316	5618	Hs.368587	NM_000949	ENSG00000113494	PRLR	HPRL|MFAB|hPRLrI	prolactin receptor	protein-coding
MACS_peak_481	chr16	6422893	6423275	+	216.88	NA	intron (NM_001308117, intron 2 of 15)	intron (NM_001308117, intron 2 of 15)	353380	NM_001308117	54715	Hs.459842	NM_018723	ENSG00000078328	RBFOX1	2BP1|A2BP1|FOX-1|FOX1|HRNBP1	RNA binding protein, fox-1 homolog (C. elegans) 1	protein-coding
MACS_peak_1304	chr7	98177288	98177938	+	216.68	NA	Intergenic	(CCTA)n|Simple_repeat|Simple_repeat	-68984	NM_002523	4885	Hs.3281	NM_002523	ENSG00000106236	NPTX2	NARP|NP-II|NP2	neuronal pentraxin II	protein-coding
MACS_peak_493	chr16	14432148	14432573	+	213.77	NA	Intergenic	(TCCA)n|Simple_repeat|Simple_repeat	29218	NR_029854	100126355		NR_029854		MIR365A	MIR365-1|MIRN365-1|hsa-mir-365a|mir-365a	microRNA 365a	ncRNA
MACS_peak_401	chr15	22562883	22563307	+	207.76	NA	intron (NR_033735, intron 1 of 2)	(CCCA)n|Simple_repeat|Simple_repeat	16530	NR_033735	646396	Hs.451294	NR_033735		REREP3	-	arginine-glutamic acid dipeptide (RE) repeats pseudogene 3	pseudo
MACS_peak_608	chr17	19076959	19077394	+	206.62	NA	Intergenic	(CCCA)n|Simple_repeat|Simple_repeat	-14991	NM_001291905	388436	Hs.677375	NM_001291905		LOC388436	-	uncharacterized protein ENSP00000382042	protein-coding
MACS_peak_1348	chr8	49638977	49639589	+	206.21	NA	intron (NR_024605, intron 4 of 5)	(CCCA)n|Simple_repeat|Simple_repeat	8587	NM_024593	79645	Hs.23245	NM_024593	ENSG00000034239	EFCAB1	-	EF-hand calcium binding domain 1	protein-coding
MACS_peak_861	chr20	47077979	47078890	+	205.51	NA	Intergenic	MER112|DNA|hAT-Charlie	89780	NR_026958	284749	Hs.299080	NR_026958	ENSG00000235621	LINC00494	-	long intergenic non-protein coding RNA 494	ncRNA
MACS_peak_873	chr20	48917252	48917981	+	204.79	NA	intron (NR_034124, intron 2 of 4)	(TGGA)n|Simple_repeat|Simple_repeat	8359	NR_034124	284751	Hs.282325	NM_001025463	ENSG00000203999	LINC01270	-	long intergenic non-protein coding RNA 1270	ncRNA
MACS_peak_1287	chr7	73281004	73281522	+	203.06	NA	Intergenic	(TCCA)n|Simple_repeat|Simple_repeat	5774	NM_182504	135886	Hs.647026	NM_182504	ENSG00000175877	WBSCR28	-	Williams-Beuren syndrome chromosome region 28	protein-coding
MACS_peak_1303	chr7	97872039	97872561	+	202.48	NA	intron (NM_015395, intron 6 of 25)	(CCCA)n|Simple_repeat|Simple_repeat	9263	NM_015395	25851	Hs.592281	NM_015395	ENSG00000205356	TECPR1	-	tectonin beta-propeller repeat containing 1	protein-coding
MACS_peak_1410	chr9	10007	10458	+	201.98	NA	Intergenic	(CCCTAA)n|Simple_repeat|Simple_repeat	-1755	NR_051986	100287596	Hs.719844	NR_051986		DDX11L5	-	DEAD/H (Asp-Glu-Ala-Asp/His) box helicase 11 like 5	pseudo
MACS_peak_1339	chr7	158805867	158806286	+	201.91	NA	intron (NR_024394, intron 1 of 4)	(TTGGGG)n|Simple_repeat|Simple_repeat	5031	NR_024394	154822	Hs.544783	NM_198345	ENSG00000231419	LINC00689	-	long intergenic non-protein coding RNA 689	ncRNA
MACS_peak_1095	chr4	8036198	8036795	+	201.20	NA	intron (NM_001286688, intron 5 of 14)	(TGGG)n|Simple_repeat|Simple_repeat	-29388	NR_029511	407052		NR_029511	ENSG00000207807	MIR95	MIRN95|hsa-mir-95|miR-95	microRNA 95	ncRNA
MACS_peak_1199	chr5	177696393	177696923	+	200.62	NA	intron (NM_173465, intron 6 of 28)	(TCCA)n|Simple_repeat|Simple_repeat	-36835	NR_103509	85007	Hs.248746	NM_153373	ENSG00000175309	PHYKPL	AGXT2L2|PHLU	5-phosphohydroxy-L-lysine phospho-lyase	protein-coding
MACS_peak_1437	chr9	101715583	101716088	+	200.55	NA	intron (NM_001855, intron 2 of 41)	(CAACC)n|Simple_repeat|Simple_repeat	9840	NM_001855	1306	Hs.409034	NM_001855	ENSG00000204291	COL15A1	-	collagen, type XV, alpha 1	protein-coding
MACS_peak_954	chr21	43564254	43564809	+	200.55	NA	Intergenic	(TCCA)n|Simple_repeat|Simple_repeat	-35887	NR_027243	150147	Hs.558646	NM_152507	ENSG00000184385	UMODL1-AS1	C21orf128	UMODL1 antisense RNA 1	ncRNA
MACS_peak_1349	chr8	69765529	69765949	+	200.53	NA	Intergenic	MIRb|SINE|MIR	250686	NR_039986	100505718	Hs.122386	NR_039986	ENSG00000253658	LINC01592	-	long intergenic non-protein coding RNA 1592	ncRNA
MACS_peak_1262	chr7	651408	652085	+	200.13	NA	intron (NM_001164762, intron 4 of 10)	intron (NM_001164762, intron 4 of 10)	8711	NR_110055	101926963	Hs.521338	NR_110054		LOC101926963	-	uncharacterized LOC101926963	ncRNA
MACS_peak_553	chr16	85379812	85380607	+	197.80	NA	Intergenic	(TGGA)n|Simple_repeat|Simple_repeat	-40278	NR_049816	100847022		NR_049816	ENSG00000266307	MIR5093	-	microRNA 5093	ncRNA
MACS_peak_594	chr16	90187863	90188750	+	196.64	NA	intron (NR_126161, intron 3 of 3)	(TTAGGG)n|Simple_repeat|Simple_repeat	19634	NR_126161	100996541	Hs.652849	NR_126161	ENSG00000260528	FAM157C	-	family with sequence similarity 157, member C	ncRNA
MACS_peak_193	chr11	69330020	69330476	+	196.23	NA	Intergenic	Intergenic	29919	NR_120545	101928292	Hs.736219	NR_120542		LINC01488	BRCAT8	long intergenic non-protein coding RNA 1488	ncRNA
MACS_peak_446	chr15	101250541	101250772	+	195.67	NA	Intergenic	(TGG)n|Simple_repeat|Simple_repeat	107901	NM_198243	140460	Hs.31845	NM_024708	ENSG00000183475	ASB7	-	ankyrin repeat and SOCS box containing 7	protein-coding
MACS_peak_1500	chr9	138253752	138254234	+	195.49	NA	Intergenic	(TGGA)n|Simple_repeat|Simple_repeat	18898	NM_173520	157927	Hs.559511	NM_173520		C9orf62	-	chromosome 9 open reading frame 62	protein-coding
MACS_peak_678	chr18	78016064	78016359	+	194.86	NA	Intergenic	(TTAGGG)n|Simple_repeat|Simple_repeat	-10814	NM_032510	84552	Hs.654920	NM_032510	ENSG00000178184	PARD6G	PAR-6G|PAR6gamma	par-6 family cell polarity regulator gamma	protein-coding
MACS_peak_2	chr1	912090	912445	+	194.22	NA	intron (NM_001291367, intron 3 of 4)	intron (NM_001291367, intron 3 of 4)	5230	NM_001291366	84808	Hs.271462	NM_032722	ENSG00000187642	PERM1	C1orf170	PPARGC1 and ESRR induced regulator, muscle 1	protein-coding
MACS_peak_4	chr1	1009065	1009451	+	193.60	NA	intron (NM_001205252, intron 1 of 1)	intron (NM_001205252, intron 1 of 1)	429	NM_001205252	401934	Hs.568137	NM_001205252		RNF223	-	ring finger protein 223	protein-coding
MACS_peak_549	chr16	84963964	84964504	+	193.60	NA	Intergenic	(TGGG)n|Simple_repeat|Simple_repeat	80907	NM_017740	55625	Hs.461610	NM_017740	ENSG00000153786	ZDHHC7	DHHC7|SERZ-B|SERZ1|ZNF370	zinc finger, DHHC-type containing 7	protein-coding
MACS_peak_1090	chr4	7697337	7697793	+	193.59	NA	intron (NM_020777, intron 11 of 26)	(TGGA)n|Simple_repeat|Simple_repeat	-58252	NR_026892	84740	Hs.663029	NM_032654	ENSG00000272620	AFAP1-AS1	AFAP1-AS|AFAP1AS	AFAP1 antisense RNA 1	ncRNA
MACS_peak_221	chr11	78770981	78771518	+	193.39	NA	intron (NM_001098816, intron 6 of 33)	intron (NM_001098816, intron 6 of 33)	341904	NR_030598	100126333		NR_030598	ENSG00000211997	MIR708	MIRN708|hsa-mir-708	microRNA 708	ncRNA
MACS_peak_1222	chr6	30719307	30719743	+	193.24	NA	Intergenic	Intergenic	-7198	NM_003897	8870	Hs.76095	NM_003897	ENSG00000137331	IER3	DIF-2|DIF2|GLY96|IEX-1|IEX-1L|IEX1|PRG1	immediate early response 3	protein-coding
MACS_peak_162	chr11	175438	175929	+	193.02	NA	Intergenic	(CCCTAA)n|Simple_repeat|Simple_repeat	-17397	NM_001097610	653486	Hs.127059	NM_001097610		SCGB1C2	-	secretoglobin, family 1C, member 2	protein-coding
MACS_peak_341	chr14	35015880	35016541	+	191.15	NA	Intergenic	CpG	-7267	NM_018453	55837	Hs.433269	NM_018453	ENSG00000129518	EAPP	BM036|C14orf11	E2F-associated phosphoprotein	protein-coding
MACS_peak_480	chr16	6422073	6422678	+	190.68	NA	intron (NM_001308117, intron 2 of 15)	(TGGA)n|Simple_repeat|Simple_repeat	352671	NM_001308117	54715	Hs.459842	NM_018723	ENSG00000078328	RBFOX1	2BP1|A2BP1|FOX-1|FOX1|HRNBP1	RNA binding protein, fox-1 homolog (C. elegans) 1	protein-coding
MACS_peak_891	chr20	56355820	56356508	+	190.21	NA	Intergenic	(TCCA)n|Simple_repeat|Simple_repeat	-69572	NM_199171	56937	Hs.517155	NM_020182	ENSG00000124225	PMEPA1	STAG1|TMEPAI	prostate transmembrane protein, androgen induced 1	protein-coding
MACS_peak_863	chr20	47257124	47257915	+	188.93	NA	intron (NM_020820, intron 29 of 39)	(TGGA)n|Simple_repeat|Simple_repeat	186901	NM_020820	57580	Hs.153310	NM_020820	ENSG00000124126	PREX1	P-REX1	phosphatidylinositol-3,4,5-trisphosphate-dependent Rac exchange factor 1	protein-coding
MACS_peak_1381	chr8	140709193	140709616	+	187.27	NA	intron (NR_104210, intron 1 of 3)	(TGGA)n|Simple_repeat|Simple_repeat	5895	NR_104210	51305	Hs.493037	NM_001282534	ENSG00000169427	KCNK9	K2p9.1|KT3.2|TASK-3|TASK3	potassium channel, two pore domain subfamily K, member 9	protein-coding
MACS_peak_387	chr14	105356131	105356676	+	185.50	NA	intron (NM_015005, intron 12 of 17)	(TGGA)n|Simple_repeat|Simple_repeat	24753	NM_015005	283638	Hs.533721	NM_015005	ENSG00000099814	CEP170B	CEP170R|FAM68C|KIAA0284	centrosomal protein 170B	protein-coding
MACS_peak_1284	chr7	45583126	45583451	+	184.78	NA	Intergenic	Intergenic	-30451	NM_001281768	107	Hs.192215	NM_021116	ENSG00000164742	ADCY1	AC1|DFNB44	adenylate cyclase 1 (brain)	protein-coding
MACS_peak_953	chr21	43226438	43226780	+	184.24	NA	intron (NM_001040424, intron 21 of 23)	(CCA)n|Simple_repeat|Simple_repeat	-39360	NM_020639	54101	Hs.517310	NM_020639	ENSG00000183421	RIPK4	ANKK2|ANKRD3|DIK|NKRD3|PKK|PPS2|RIP4	receptor-interacting serine-threonine kinase 4	protein-coding
MACS_peak_121	chr10	7420213	7420521	+	183.96	NA	intron (NM_001029880, intron 2 of 20)	(TG)n|Simple_repeat|Simple_repeat	30936	NM_001018039	57713	Hs.407983	NM_001018039	ENSG00000198879	SFMBT2	-	Scm-like with four mbt domains 2	protein-coding
MACS_peak_490	chr16	12474383	12475018	+	183.84	NA	intron (NM_032167, intron 16 of 20)	(CCCA)n|Simple_repeat|Simple_repeat	-339478	NR_039869	100616195		NR_039869	ENSG00000264733	MIR4718	-	microRNA 4718	ncRNA
MACS_peak_1329	chr7	155774359	155774820	+	183.02	NA	Intergenic	(TCCA)n|Simple_repeat|Simple_repeat	19263	NM_001291913	389602	Hs.583071	NM_001291913		LOC389602	-	uncharacterized LOC389602	protein-coding
MACS_peak_140	chr10	95194838	95195237	+	182.16	NA	intron (NM_133337, intron 3 of 52)	MIR3|SINE|MIR	47037	NM_133337	26509	Hs.602086	NM_013451	ENSG00000138119	MYOF	FER1L3	myoferlin	protein-coding
MACS_peak_564	chr16	87772247	87772912	+	181.69	NA	intron (NM_017566, intron 5 of 11)	intron (NM_017566, intron 5 of 11)	27019	NM_017566	54758	Hs.123450	NM_017566	ENSG00000104731	KLHDC4	-	kelch domain containing 4	protein-coding
MACS_peak_189	chr11	68981974	68982253	+	180.98	NA	Intergenic	(CTAA)n|Simple_repeat|Simple_repeat	-43083	NR_104161	338694	Hs.564235	NR_104161	ENSG00000261070	LOC338694	-	uncharacterized LOC338694	ncRNA
MACS_peak_907	chr20	60004382	60004917	+	180.57	NA	intron (NM_001794, intron 2 of 15)	(TGGG)n|Simple_repeat|Simple_repeat	-69828	NM_001252338	1002	Hs.473231	NM_001794	ENSG00000179242	CDH4	CAD4|R-CAD|RCAD	cadherin 4, type 1, R-cadherin (retinal)	protein-coding
MACS_peak_422	chr15	77304589	77305008	+	180.45	NA	intron (NM_003978, intron 1 of 14)	(TCCA)n|Simple_repeat|Simple_repeat	17333	NM_003978	9051	Hs.129758	NM_003978	ENSG00000140368	PSTPIP1	CD2BP1|CD2BP1L|CD2BP1S|H-PIP|PAPAS|PSTPIP	proline-serine-threonine phosphatase interacting protein 1	protein-coding
MACS_peak_724	chr19	49406624	49407201	+	180.21	NA	intron (NM_006184, intron 2 of 12)	(TGGA)n|Simple_repeat|Simple_repeat	3605	NM_006184	4924	Hs.631602	NM_006184	ENSG00000104805	NUCB1	CALNUC|NUC	nucleobindin 1	protein-coding
MACS_peak_590	chr16	89664337	89664794	+	179.61	NA	TTS (NM_014427)	TTS (NM_014427)	-15151	NM_001128141	1800	Hs.109	NM_004413	ENSG00000015413	DPEP1	MBD1|MDP|RDP	dipeptidase 1 (renal)	protein-coding
MACS_peak_530	chr16	71659032	71659648	+	179.33	NA	promoter-TSS (NM_052858)	promoter-TSS (NM_052858)	-716	NM_001271329	91862	Hs.513706	NM_052858	ENSG00000140832	MARVELD3	MARVD3|MRVLDC3	MARVEL domain containing 3	protein-coding
MACS_peak_570	chr16	88277677	88278059	+	179.00	NA	Intergenic	(TGGA)n|Simple_repeat|Simple_repeat	49981	NR_110944	101928880	Hs.634835	NR_110944	ENSG00000260420	LOC101928880	LA16c-444G7.2	uncharacterized LOC101928880	ncRNA
MACS_peak_1018	chr3	96994329	96994720	+	177.52	NA	intron (NM_001080448, intron 5 of 17)	HERVH-int|LTR|ERV1	-163913	NM_173655	285220	Hs.653244	NM_173655	ENSG00000080224	EPHA6	EHK-2|EHK2|EK12|EPA6|HEK12|PRO57066	EPH receptor A6	protein-coding
MACS_peak_931	chr20	62123475	62123967	+	176.83	NA	intron (NM_001958, intron 5 of 7)	(TGGA)n|Simple_repeat|Simple_repeat	6947	NM_001958	1917	Hs.433839	NM_001958	ENSG00000101210	EEF1A2	EEF1AL|EF-1-alpha-2|EF1A|EIEE33|HS1|MRD38|STN|STNL	eukaryotic translation elongation factor 1 alpha 2	protein-coding
MACS_peak_487	chr16	11580126	11580659	+	176.38	NA	Intergenic	(TGGA)n|Simple_repeat|Simple_repeat	21276	NR_110907	101927131	Hs.569654	NR_110907	ENSG00000262999	LOC101927131	-	uncharacterized LOC101927131	ncRNA
MACS_peak_1170	chr5	170181375	170181887	+	174.76	NA	Intergenic	(TGGA)n|Simple_repeat|Simple_repeat	-29092	NM_001291985	2568	Hs.26225	NM_014211	ENSG00000094755	GABRP	-	gamma-aminobutyric acid (GABA) A receptor, pi	protein-coding
MACS_peak_354	chr14	84991959	84992491	+	173.74	NA	Intergenic	(TAGG)n|Simple_repeat|Simple_repeat	-867998	NR_102737	100996280	Hs.135735	NR_102737	ENSG00000259107	LINC00911	-	long intergenic non-protein coding RNA 911	ncRNA
MACS_peak_362	chr14	93483723	93484033	+	173.47	NA	intron (NM_001142593, intron 3 of 10)	intron (NM_001142593, intron 3 of 10)	-49919	NR_002808	319085	Hs.612888	NR_002808	ENSG00000258730	ITPK1-AS1	C14orf85|ITPK1-AS|ITPK1AS|NCRNA00203	ITPK1 antisense RNA 1	ncRNA
MACS_peak_464	chr16	1543344	1543679	+	173.25	NA	5' UTR (NM_016111, exon 1 of 21)	5' UTR (NM_016111, exon 1 of 21)	159	NM_016111	9894	Hs.271044	NM_016111	ENSG00000100726	TELO2	CLK2|TEL2	telomere maintenance 2	protein-coding
MACS_peak_233	chr12	2905014	2905414	+	172.45	NA	intron (NM_002014, intron 1 of 9)	intron (NM_002014, intron 1 of 9)	1106	NM_002014	2288	Hs.524183	NM_002014	ENSG00000004478	FKBP4	FKBP51|FKBP52|FKBP59|HBI|Hsp56|PPIase|p52	FK506 binding protein 4	protein-coding
MACS_peak_407	chr15	39960667	39961068	+	172.16	NA	intron (NM_152597, intron 10 of 11)	intron (NM_152597, intron 10 of 11)	87587	NM_003246	7057	Hs.164226	NM_003246		THBS1	THBS|THBS-1|TSP|TSP-1|TSP1	thrombospondin 1	protein-coding
MACS_peak_685	chr19	10488087	10488628	+	171.61	NA	intron (NM_003331, intron 3 of 24)	(TGGA)n|Simple_repeat|Simple_repeat	2891	NM_003331	7297	Hs.75516	NM_003331	ENSG00000105397	TYK2	IMD35|JTK1	tyrosine kinase 2	protein-coding
MACS_peak_1108	chr4	175204753	175205223	+	170.26	NA	promoter-TSS (NM_001145314)	promoter-TSS (NM_001145314)	-67	NM_001145314	80817	Hs.555989	NM_030633	ENSG00000164118	CEP44	KIAA1712|PS1TP3	centrosomal protein 44kDa	protein-coding
MACS_peak_115	chr10	5610751	5611271	+	169.89	NA	Intergenic	(TTGG)n|Simple_repeat|Simple_repeat	-42802	NR_120497	100132159	Hs.239600	NR_120496		CALML3-AS1	-	CALML3 antisense RNA 1	ncRNA
MACS_peak_543	chr16	84001126	84001665	+	169.50	NA	promoter-TSS (NM_019065)	promoter-TSS (NM_019065)	-842	NM_019065	54550	Hs.140950	NM_019065	ENSG00000103154	NECAB2	EFCBP2	N-terminal EF-hand calcium binding protein 2	protein-coding
MACS_peak_1342	chr8	12443285	12443666	+	169.28	NA	intron (NR_047662, intron 6 of 8)	(TGGA)n|Simple_repeat|Simple_repeat	79645	NR_047662	729732	Hs.322761	NR_047662		LOC729732	-	uncharacterized LOC729732	ncRNA
MACS_peak_698	chr19	19065339	19065930	+	168.67	NA	Intergenic	(TCCA)n|Simple_repeat|Simple_repeat	-13593	NM_004838	9454	Hs.720208	NM_004838	ENSG00000051128	HOMER3	HOMER-3|VESL3	homer scaffolding protein 3	protein-coding
MACS_peak_987	chr3	9773110	9773567	+	168.06	NA	promoter-TSS (NM_004634)	promoter-TSS (NM_004634)	-96	NM_001003694	7862	Hs.1004	NM_004634	ENSG00000156983	BRPF1	BR140	bromodomain and PHD finger containing 1	protein-coding
MACS_peak_1058	chr3	195502684	195502848	+	167.42	NA	intron (NM_138297, intron 1 of 22)	(CATAC)n|Simple_repeat|Simple_repeat	36078	NM_004532	4585	Hs.369646	NM_004532	ENSG00000145113	MUC4	ASGP|HSA276359|MUC-4	mucin 4, cell surface associated	protein-coding
MACS_peak_1122	chr5	1275946	1276367	+	166.63	NA	intron (NM_198253, intron 6 of 15)	intron (NM_198253, intron 6 of 15)	19006	NM_198253	7015	Hs.492203	NM_198253	ENSG00000164362	TERT	CMM9|DKCA2|DKCB4|EST2|PFBMFT1|TCS1|TP2|TRT|hEST2|hTRT	telomerase reverse transcriptase	protein-coding
MACS_peak_1265	chr7	1311996	1312628	+	166.29	NA	Intergenic	Intergenic	39658	NM_001080461	340260	Hs.232272	NM_001080461		UNCX	UNCX4.1	UNC homeobox	protein-coding
MACS_peak_1137	chr5	26236219	26236790	+	166.17	NA	Intergenic	(TGGG)n|Simple_repeat|Simple_repeat	802185	NM_016279	1007	Hs.272212	NM_016279	ENSG00000113100	CDH9	-	cadherin 9, type 2 (T1-cadherin)	protein-coding
MACS_peak_324	chr12	132978346	132978911	+	166.11	NA	Intergenic	(CCCA)n|Simple_repeat|Simple_repeat	72192	NR_120467	101928416		NR_120467	ENSG00000255916	LOC101928416	-	uncharacterized LOC101928416	ncRNA
MACS_peak_166	chr11	1817783	1818110	+	166.08	NA	Intergenic	Intergenic	-32724	NM_001909	1509	Hs.654447	NM_001909	ENSG00000117984	CTSD	CLN10|CPSD|HEL-S-130P	cathepsin D	protein-coding
MACS_peak_176	chr11	47447622	47448158	+	165.57	NA	5' UTR (NM_002804, exon 1 of 12)	5' UTR (NM_002804, exon 1 of 12)	134	NM_002804	5702	Hs.250758	NM_002804	ENSG00000165916	PSMC3	TBP1	proteasome 26S subunit, ATPase 3	protein-coding
MACS_peak_1452	chr9	123055546	123055793	+	163.77	NA	Intergenic	(TTGG)n|Simple_repeat|Simple_repeat	-48341	NR_029604	406939		NR_029604	ENSG00000207814	MIR147A	MIR147|MIRN147|hsa-mir-147a	microRNA 147a	ncRNA
MACS_peak_745	chr2	1721539	1722148	+	163.43	NA	intron (NM_012293, intron 1 of 22)	(CCAA)n|Simple_repeat|Simple_repeat	26476	NM_012293	7837	Hs.332197	NM_012293	ENSG00000130508	PXDN	COPOA|D2S448|D2S448E|MG50|PRG2|PXN|VPO	peroxidasin	protein-coding
MACS_peak_1473	chr9	135394422	135394856	+	163.17	NA	intron (NM_001282957, intron 3 of 5)	(TGGA)n|Simple_repeat|Simple_repeat	-63354	NM_020064	56751	Hs.283809	NM_020064	ENSG00000125492	BARHL1	-	BarH-like homeobox 1	protein-coding
MACS_peak_195	chr11	69629699	69630100	+	162.99	NA	intron (NM_005247, intron 2 of 2)	(TGGA)n|Simple_repeat|Simple_repeat	4293	NM_005247	2248	Hs.37092	NM_005247		FGF3	HBGF-3|INT2	fibroblast growth factor 3	protein-coding
MACS_peak_1179	chr5	172711520	172712055	+	162.30	NA	Intergenic	(TCCA)n|Simple_repeat|Simple_repeat	44719	NM_003714	8614	Hs.233160	NM_003714	ENSG00000113739	STC2	STC-2|STCRP	stanniocalcin 2	protein-coding
MACS_peak_773	chr2	64603013	64603293	+	161.37	NA	Intergenic	(CCA)n|Simple_repeat|Simple_repeat	-35171	NR_106995	102465833		NR_106995	ENSG00000264297	MIR4433B	hsa-mir-4433b	microRNA 4433b	ncRNA
MACS_peak_269	chr12	113828057	113828572	+	160.66	NA	TTS (NM_001159727)	TTS (NM_001159727)	13378	NM_006843	10993	Hs.439023	NM_006843	ENSG00000135094	SDS	SDH	serine dehydratase	protein-coding
MACS_peak_1379	chr8	139218481	139219223	+	160.20	NA	intron (NM_015912, intron 7 of 19)	intron (NM_015912, intron 7 of 19)	290213	NM_015912	51059	Hs.126024	NM_015912	ENSG00000147724	FAM135B	C8ORFK32	family with sequence similarity 135, member B	protein-coding
MACS_peak_1242	chr6	143618413	143618825	+	160.00	NA	intron (NM_001286587, intron 5 of 6)	(TTGG)n|Simple_repeat|Simple_repeat	145195	NM_001286259	134637	Hs.709561	NM_182503	ENSG00000189007	ADAT2	DEADC1|TAD2|dJ20N2|dJ20N2.1	adenosine deaminase, tRNA-specific 2	protein-coding
MACS_peak_353	chr14	77866586	77866970	+	159.48	NA	intron (NM_001113475, intron 5 of 5)	MER4A|LTR|ERV1	22621	NM_001113475	122945	Hs.97556	NM_138791	ENSG00000165555	NOXRED1	C14orf148	NADP-dependent oxidoreductase domain containing 1	protein-coding
MACS_peak_566	chr16	88196388	88196757	+	159.36	NA	Intergenic	Intergenic	-31315	NR_110944	101928880	Hs.634835	NR_110944	ENSG00000260420	LOC101928880	LA16c-444G7.2	uncharacterized LOC101928880	ncRNA
MACS_peak_995	chr3	13600142	13600557	+	156.74	NA	intron (NM_001004019, intron 1 of 17)	intron (NM_001004019, intron 1 of 17)	9724	NM_001004019	2199	Hs.198862	NM_001998	ENSG00000163520	FBLN2	-	fibulin 2	protein-coding
MACS_peak_400	chr15	22520531	22521022	+	156.07	NA	Intergenic	Intergenic	-7496	NR_031672	100302233		NR_031672	ENSG00000221641	MIR1268A	MIR1268|MIRN1268|hsa-mir-1268|hsa-mir-1268a	microRNA 1268a	ncRNA
MACS_peak_966	chr21	47510797	47511375	+	155.93	NA	Intergenic	(TGG)n|Simple_repeat|Simple_repeat	-6947	NM_001849	1292	Hs.420269	NM_001849	ENSG00000142173	COL6A2	PP3610	collagen, type VI, alpha 2	protein-coding
MACS_peak_707	chr19	34363411	34363805	+	155.79	NA	Intergenic	(TCCA)n|Simple_repeat|Simple_repeat	75857	NM_024076	79047	Hs.221873	NM_024076	ENSG00000153885	KCTD15	-	potassium channel tetramerization domain containing 15	protein-coding
MACS_peak_208	chr11	71091184	71091862	+	155.49	NA	Intergenic	(TGGA)n|Simple_repeat|Simple_repeat	42877	NR_038862	399923	Hs.128191	NM_001001680	ENSG00000172900	FLJ42102	-	uncharacterized LOC399923	ncRNA
MACS_peak_1482	chr9	136735857	136736168	+	152.87	NA	intron (NM_003371, intron 2 of 26)	(TGGG)n|Simple_repeat|Simple_repeat	121434	NM_003371	7410	Hs.369921	NM_003371	ENSG00000160293	VAV2	VAV-2	vav 2 guanine nucleotide exchange factor	protein-coding
MACS_peak_691	chr19	16574558	16575091	+	152.62	NA	intron (NM_001258375, intron 1 of 21)	intron (NM_001258375, intron 1 of 21)	7999	NM_001258374	58513	Hs.654639	NM_021235	ENSG00000127527	EPS15L1	EPS15R	epidermal growth factor receptor pathway substrate 15-like 1	protein-coding
MACS_peak_1065	chr3	197186234	197186881	+	152.45	NA	Intergenic	(GGATG)n|Simple_repeat|Simple_repeat	96301	NM_203314	622	Hs.274539	NM_004051	ENSG00000161267	BDH1	BDH|SDR9C1	3-hydroxybutyrate dehydrogenase, type 1	protein-coding
MACS_peak_325	chr12	133095140	133095724	+	152.04	NA	intron (NM_001142641, intron 2 of 16)	(TCCA)n|Simple_repeat|Simple_repeat	28275	NM_001142641	57666	Hs.411138	NM_001142641	ENSG00000112787	FBRSL1	-	fibrosin-like 1	protein-coding
MACS_peak_1468	chr9	133249159	133249584	+	151.77	NA	intron (NM_001291815, intron 37 of 86)	(TGGA)n|Simple_repeat|Simple_repeat	-70723	NM_054012	445	Hs.160786	NM_000050	ENSG00000130707	ASS1	ASS|CTLN1	argininosuccinate synthase 1	protein-coding
MACS_peak_1181	chr5	172962404	172962891	+	151.75	NA	Intergenic	MIRb|SINE|MIR	-43990	NR_027108	285593	Hs.409730	NR_027108	ENSG00000253955	LOC285593	-	uncharacterized LOC285593	ncRNA
MACS_peak_1434	chr9	101155465	101155940	+	151.68	NA	intron (NM_005458, intron 9 of 18)	(TCCA)n|Simple_repeat|Simple_repeat	-137699	NM_001267571	55357	Hs.371016	NM_018421	ENSG00000095383	TBC1D2	PARIS-1|PARIS1|TBC1D2A	TBC1 domain family, member 2	protein-coding
MACS_peak_62	chr1	149223042	149224285	+	150.92	NA	Intergenic	Intergenic	-63467	NR_111933	388692	Hs.271249	NM_001013644		LOC388692	-	uncharacterized LOC388692	ncRNA
MACS_peak_874	chr20	48946405	48947217	+	150.66	NA	Intergenic	(TGGA)n|Simple_repeat|Simple_repeat	-8932	NR_109950	101927586	Hs.637665	NR_109950	ENSG00000233077	LINC01271	-	long intergenic non-protein coding RNA 1271	ncRNA
MACS_peak_575	chr16	88461459	88461817	+	150.44	NA	Intergenic	(TGGA)n|Simple_repeat|Simple_repeat	-32241	NM_001127464	84627	Hs.54925	NM_001127464	ENSG00000225614	ZNF469	BCS|BCS1	zinc finger protein 469	protein-coding
MACS_peak_1164	chr5	148373938	148374319	+	150.23	NA	3' UTR (NM_024577, exon 17 of 17)	3' UTR (NM_024577, exon 17 of 17)	68609	NM_024577	79628	Hs.483784	NM_024577		SH3TC2	CMT4C|MNMN	SH3 domain and tetratricopeptide repeats 2	protein-coding
MACS_peak_382	chr14	104765159	104765723	+	148.55	NA	Intergenic	(TCCA)n|Simple_repeat|Simple_repeat	160381	NM_015656	26153	Hs.134970	NM_015656	ENSG00000066735	KIF26A	-	kinesin family member 26A	protein-coding
MACS_peak_1469	chr9	133330225	133330589	+	148.23	NA	intron (NM_000050, intron 4 of 15)	(TCCA)n|Simple_repeat|Simple_repeat	10313	NM_000050	445	Hs.160786	NM_000050	ENSG00000130707	ASS1	ASS|CTLN1	argininosuccinate synthase 1	protein-coding
MACS_peak_997	chr3	13711042	13711418	+	148.17	NA	intron (NR_027103, intron 1 of 5)	(CCCA)n|Simple_repeat|Simple_repeat	19009	NR_027103	285375	Hs.319969	NR_027103	ENSG00000224514	LINC00620	-	long intergenic non-protein coding RNA 620	ncRNA
MACS_peak_1364	chr8	103954680	103954950	+	147.68	NA	intron (NR_126339, intron 2 of 2)	(CATCC)n|Simple_repeat|Simple_repeat	78316	NR_126338	100506753	Hs.602901	NR_126338		AZIN1-AS1	-	AZIN1 antisense RNA 1	ncRNA
MACS_peak_1269	chr7	1455626	1455984	+	147.40	NA	Intergenic	(TGGA)n|Simple_repeat|Simple_repeat	43304	NM_182924	79778	Hs.376617	NM_024723	ENSG00000164877	MICALL2	JRAB|MICAL-L2	MICAL-like 2	protein-coding
MACS_peak_1332	chr7	157629688	157630081	+	147.05	NA	intron (NM_001308268, intron 12 of 22)	(CCCA)n|Simple_repeat|Simple_repeat	-17393	NR_038966	100506585	Hs.661265	NR_038966	ENSG00000233038	LOC100506585	-	uncharacterized LOC100506585	ncRNA
MACS_peak_252	chr12	69312291	69312684	+	147.01	NA	intron (NM_198320, intron 2 of 8)	L2b|LINE|L2	14492	NM_001005502	1368	Hs.654387	NM_001874	ENSG00000135678	CPM	-	carboxypeptidase M	protein-coding
MACS_peak_1467	chr9	133236112	133236434	+	146.81	NA	intron (NM_001291815, intron 27 of 86)	(TCCA)n|Simple_repeat|Simple_repeat	-83821	NM_054012	445	Hs.160786	NM_000050	ENSG00000130707	ASS1	ASS|CTLN1	argininosuccinate synthase 1	protein-coding
MACS_peak_256	chr12	92760679	92761133	+	146.77	NA	Intergenic	(TTGG)n|Simple_repeat|Simple_repeat	-54401	NR_027932	574028	Hs.730377	NM_001025233	ENSG00000257127	CLLU1	-	chronic lymphocytic leukemia up-regulated 1	protein-coding
MACS_peak_1495	chr9	137682165	137682520	+	146.61	NA	intron (NM_000093, intron 32 of 65)	(TCCA)n|Simple_repeat|Simple_repeat	58873	NR_039691	100616333		NR_039691	ENSG00000264744	MIR3689C	-	microRNA 3689c	ncRNA
MACS_peak_1485	chr9	136968852	136969322	+	146.59	NA	Intergenic	(TCCA)n|Simple_repeat|Simple_repeat	-32123	NM_017588	11091	Hs.397638	NM_017588	ENSG00000196363	WDR5	BIG-3|CFAP89|SWD3	WD repeat domain 5	protein-coding
MACS_peak_514	chr16	27839066	27839646	+	146.56	NA	intron (NM_144675, intron 4 of 5)	(TCCA)n|Simple_repeat|Simple_repeat	60122	NM_144675	146395	Hs.91910	NM_144675	ENSG00000169181	GSG1L	PRO19651	GSG1-like	protein-coding
MACS_peak_519	chr16	29309139	29309573	+	146.08	NA	Intergenic	(TGGA)n|Simple_repeat|Simple_repeat	-4252	NR_002939	440352	Hs.658149	NR_002939		SNX29P2	RUNDC2C	sorting nexin 29 pseudogene 2	pseudo
MACS_peak_436	chr15	92294063	92294340	+	145.98	NA	Intergenic	(TGG)n|Simple_repeat|Simple_repeat	-102737	NM_001145044	28232	Hs.311187	NM_013272	ENSG00000176463	SLCO3A1	OATP-D|OATP3A1|OATPD|SLC21A11	solute carrier organic anion transporter family, member 3A1	protein-coding
MACS_peak_774	chr2	70661827	70662354	+	145.68	NA	Intergenic	(CCTAT)n|Simple_repeat|Simple_repeat	46682	NR_046798	100874273	Hs.682157	NR_046798	ENSG00000224606	TGFA-IT1	-	TGFA intronic transcript 1	ncRNA
MACS_peak_1257	chr7	496224	496688	+	145.68	NA	Intergenic	(CCCCAA)n|Simple_repeat|Simple_repeat	63025	NM_002607	5154	Hs.535898	NM_002607	ENSG00000197461	PDGFA	PDGF-A|PDGF1	platelet-derived growth factor alpha polypeptide	protein-coding
MACS_peak_415	chr15	71389017	71389353	+	144.77	NA	Intergenic	Intergenic	18654	NM_001102658	196993	Hs.646533	NM_001102658	ENSG00000225362	CT62	-	cancer/testis antigen 62	protein-coding
MACS_peak_300	chr12	131584543	131584946	+	144.49	NA	intron (NM_198827, intron 15 of 24)	HAL1-2a_MD|LINE|L1	-64812	NR_026670	116437	Hs.675497	NR_026670	ENSG00000204603	LINC01257	-	long intergenic non-protein coding RNA 1257	ncRNA
MACS_peak_1382	chr8	140765044	140765625	+	144.23	NA	intron (NM_031466, intron 21 of 22)	(TCCA)n|Simple_repeat|Simple_repeat	-50035	NM_001282534	51305	Hs.493037	NM_001282534	ENSG00000169427	KCNK9	K2p9.1|KT3.2|TASK-3|TASK3	potassium channel, two pore domain subfamily K, member 9	protein-coding
MACS_peak_756	chr2	11093701	11094276	+	143.59	NA	Intergenic	HAL1-2a_MD|LINE|L1	41925	NM_002236	3754	Hs.23735	NM_002236	ENSG00000162975	KCNF1	IK8|KCNF|KV5.1|kH1	potassium channel, voltage gated modifier subfamily F, member 1	protein-coding
MACS_peak_1281	chr7	30634183	30634626	+	142.71	NA	promoter-TSS (NM_001316772)	promoter-TSS (NM_001316772)	53	NM_001316772	2617	Hs.404321	NM_002047	ENSG00000106105	GARS	CMT2D|DSMAV|GlyRS|HMN5|SMAD1	glycyl-tRNA synthetase	protein-coding
MACS_peak_516	chr16	29208452	29208936	+	142.46	NA	Intergenic	(TGGA)n|Simple_repeat|Simple_repeat	-104914	NR_002939	440352	Hs.658149	NR_002939		SNX29P2	RUNDC2C	sorting nexin 29 pseudogene 2	pseudo
MACS_peak_1403	chr8	144474185	144474632	+	142.42	NA	Intergenic	(TCCA)n|Simple_repeat|Simple_repeat	23383	NM_052924	114822	Hs.521912	NM_052924	ENSG00000158106	RHPN1	ODF5|RHOPHILIN|RHPN	rhophilin, Rho GTPase binding protein 1	protein-coding
MACS_peak_737	chr19	57621733	57622015	+	141.58	NA	Intergenic	(TTAAA)n|Simple_repeat|Simple_repeat	-9635	NM_020903	57663	Hs.515632	NM_020903	ENSG00000131864	USP29	HOM-TES-84/86	ubiquitin specific peptidase 29	protein-coding
MACS_peak_177	chr11	62608899	62609415	+	141.42	NA	Intergenic	U2|snRNA|snRNA	-1529	NM_018093	54663	Hs.654620	NM_018093	ENSG00000133316	WDR74	-	WD repeat domain 74	protein-coding
MACS_peak_1134	chr5	14402948	14403404	+	141.35	NA	intron (NM_007118, intron 31 of 56)	(TGG)n|Simple_repeat|Simple_repeat	-178715	NM_019018	54491	Hs.155085	NM_019018		FAM105A	NET20	family with sequence similarity 105, member A	protein-coding
MACS_peak_1474	chr9	135394942	135395290	+	141.00	NA	intron (NM_001282957, intron 3 of 5)	(TGGA)n|Simple_repeat|Simple_repeat	-62877	NM_020064	56751	Hs.283809	NM_020064	ENSG00000125492	BARHL1	-	BarH-like homeobox 1	protein-coding
MACS_peak_567	chr16	88197028	88197602	+	140.81	NA	Intergenic	(TGGA)n|Simple_repeat|Simple_repeat	-30572	NR_110944	101928880	Hs.634835	NR_110944	ENSG00000260420	LOC101928880	LA16c-444G7.2	uncharacterized LOC101928880	ncRNA
MACS_peak_1023	chr3	107718348	107718790	+	140.63	NA	Intergenic	LTR39|LTR|ERV1	91366	NM_198793	961	Hs.446414	NM_001777	ENSG00000196776	CD47	IAP|MER6|OA3	CD47 molecule	protein-coding
MACS_peak_654	chr17	75854612	75854868	+	140.23	NA	Intergenic	(TCCA)n|Simple_repeat|Simple_repeat	25429	NR_028337	400624	Hs.514521	NM_001001685	ENSG00000204283	FLJ45079	-	FLJ45079 protein	ncRNA
MACS_peak_1486	chr9	137158113	137158531	+	139.61	NA	Intergenic	(TGGA)n|Simple_repeat|Simple_repeat	-59987	NM_002957	6256	Hs.590886	NM_002957		RXRA	NR2B1	retinoid X receptor alpha	protein-coding
MACS_peak_1350	chr8	69766676	69767052	+	139.48	NA	Intergenic	Intergenic	249561	NR_039986	100505718	Hs.122386	NR_039986	ENSG00000253658	LINC01592	-	long intergenic non-protein coding RNA 1592	ncRNA
MACS_peak_784	chr2	100253155	100253476	+	139.31	NA	intron (NM_001025108, intron 12 of 23)	intron (NM_001025108, intron 12 of 23)	-146835	NM_001037872	51455	Hs.443077	NM_016316	ENSG00000135945	REV1	REV1L	REV1, DNA directed polymerase	protein-coding
MACS_peak_427	chr15	80743841	80744302	+	138.11	NA	intron (NM_014862, intron 2 of 18)	(CCAA)n|Simple_repeat|Simple_repeat	47379	NM_014862	9915	Hs.459070	NM_014862	ENSG00000172379	ARNT2	WEDAS|bHLHe1	aryl-hydrocarbon receptor nuclear translocator 2	protein-coding
MACS_peak_321	chr12	132889641	132890036	+	137.71	NA	intron (NM_001122636, intron 1 of 10)	(CCCA)n|Simple_repeat|Simple_repeat	16067	NM_001122636	50614	Hs.301062	NM_021808	ENSG00000182870	GALNT9	GALNAC-T9|GALNACT9	polypeptide N-acetylgalactosaminyltransferase 9	protein-coding
MACS_peak_1525	chrX	7812200	7812530	+	136.81	NA	TTS (NM_013452)	TTS (NM_013452)	2062	NM_013452	26609	Hs.278906	NM_013452	ENSG00000182583	VCX	VCX-10r|VCX-B1|VCX1|VCX10R|VCXB1	variable charge, X-linked	protein-coding
MACS_peak_952	chr21	43113917	43114441	+	136.75	NA	intron (NR_024367, intron 2 of 2)	(TCCA)n|Simple_repeat|Simple_repeat	14717	NR_024367	54090	Hs.570442	NR_024367		LINC00111	C21orf21|NCRNA00111	long intergenic non-protein coding RNA 111	ncRNA
MACS_peak_706	chr19	34361617	34361971	+	136.68	NA	Intergenic	(CCCA)n|Simple_repeat|Simple_repeat	74043	NM_024076	79047	Hs.221873	NM_024076	ENSG00000153885	KCTD15	-	potassium channel tetramerization domain containing 15	protein-coding
MACS_peak_145	chr10	106240581	106240949	+	135.70	NA	promoter-TSS (NR_120624)	promoter-TSS (NR_120624)	-732	NR_120624	101927523	Hs.407539	NR_120624	ENSG00000225768	LOC101927523	-	uncharacterized LOC101927523	ncRNA
MACS_peak_1529	chrX	115416743	115417111	+	135.70	NA	Intergenic	Intergenic	114969	NM_000686	186	Hs.405348	NM_000686	ENSG00000180772	AGTR2	AT2|ATGR2|MRX88	angiotensin II receptor, type 2	protein-coding
MACS_peak_444	chr15	99292451	99292785	+	135.18	NA	intron (NM_001291858, intron 2 of 20)	intron (NM_001291858, intron 2 of 20)	-35037	NR_039864	100616432		NR_039864	ENSG00000264480	MIR4714	-	microRNA 4714	ncRNA
MACS_peak_875	chr20	49075454	49076219	+	134.84	NA	Intergenic	(TGGA)n|Simple_repeat|Simple_repeat	-51022	NM_002827	5770	Hs.417549	NM_002827	ENSG00000196396	PTPN1	PTP1B	protein tyrosine phosphatase, non-receptor type 1	protein-coding
MACS_peak_663	chr17	79399298	79399582	+	134.77	NA	intron (NM_001291324, intron 1 of 27)	HAL1-2a_MD|LINE|L1	18774	NR_036152	100422944		NR_036152	ENSG00000266189	MIR3186	mir-3186	microRNA 3186	ncRNA
MACS_peak_471	chr16	4277057	4277430	+	134.42	NA	intron (NM_001098814, intron 1 of 5)	(TGGA)n|Simple_repeat|Simple_repeat	14838	NM_001098814	6345	Hs.10041	NM_001098814	ENSG00000185739	SRL	-	sarcalumenin	protein-coding
MACS_peak_441	chr15	98887801	98888282	+	133.97	NA	Intergenic	(TGGA)n|Simple_repeat|Simple_repeat	169570	NM_182562	283777	Hs.668070	NM_182562	ENSG00000185087	FAM169B	-	family with sequence similarity 169, member B	protein-coding
MACS_peak_216	chr11	76424429	76424877	+	132.64	NA	intron (NR_024042, intron 6 of 20)	(TGGG)n|Simple_repeat|Simple_repeat	8180	NR_024042	390226	Hs.440026	NR_024042		GUCY2EP	GC-E|GCD|GUCY2E	guanylate cyclase 2E, pseudogene	pseudo
MACS_peak_1298	chr7	93181151	93181545	+	132.11	NA	intron (NM_001164737, intron 2 of 15)	intron (NM_001164737, intron 2 of 15)	7774	NM_001164738	799	Hs.489127	NM_001742	ENSG00000004948	CALCR	CRT|CT-R|CTR|CTR1	calcitonin receptor	protein-coding
MACS_peak_967	chr21	47543819	47544276	+	131.80	NA	intron (NM_058174, intron 21 of 27)	(TGGA)n|Simple_repeat|Simple_repeat	26014	NM_058174	1292	Hs.420269	NM_001849	ENSG00000142173	COL6A2	PP3610	collagen, type VI, alpha 2	protein-coding
MACS_peak_101	chr10	1457205	1457520	+	131.79	NA	intron (NM_018702, intron 1 of 9)	(TGGA)n|Simple_repeat|Simple_repeat	-111463	NR_033387	642394	Hs.568831	NM_001098830	ENSG00000205696	ADARB2-AS1	C10orf109|NCRNA00168|bA466B20.1	ADARB2 antisense RNA 1	ncRNA
MACS_peak_973	chr22	18359640	18360329	+	131.62	NA	intron (NM_001136004, intron 17 of 21)	intron (NM_001136004, intron 17 of 21)	29668	NM_001122731	57553	Hs.528024	NM_015241	ENSG00000243156	MICAL3	MICAL-3	microtubule associated monooxygenase, calponin and LIM domain containing 3	protein-coding
MACS_peak_265	chr12	110246724	110247182	+	131.58	NA	intron (NM_021625, intron 2 of 15)	(TCCA)n|Simple_repeat|Simple_repeat	5648	NM_001177431	59341	Hs.506713	NM_021625	ENSG00000111199	TRPV4	BCYM3|CMT2C|HMSN2C|OTRPC4|SMAL|SPSMA|SSQTL1|TRP12|VRL2|VROAC	transient receptor potential cation channel, subfamily V, member 4	protein-coding
MACS_peak_1190	chr5	175488262	175488634	+	131.29	NA	intron (NR_103794, intron 1 of 2)	(TTGGGG)n|Simple_repeat|Simple_repeat	610	NR_103794	100996385	Hs.382347	NR_103794	ENSG00000248469	LOC100996385	-	uncharacterized LOC100996385	ncRNA
MACS_peak_342	chr14	35025155	35025583	+	131.22	NA	Intergenic	CpG	-16426	NM_018453	55837	Hs.433269	NM_018453	ENSG00000129518	EAPP	BM036|C14orf11	E2F-associated phosphoprotein	protein-coding
MACS_peak_251	chr12	67108592	67109007	+	130.79	NA	Intergenic	Intergenic	-35874	NM_021150	23426	Hs.505946	NM_021150	ENSG00000155974	GRIP1	GRIP	glutamate receptor interacting protein 1	protein-coding
MACS_peak_315	chr12	132650673	132651027	+	130.41	NA	Intergenic	(TCCA)n|Simple_repeat|Simple_repeat	21878	NM_024078	79050	Hs.558536	NM_024078	ENSG00000184967	NOC4L	NET49|NOC4|UTP19	nucleolar complex associated 4 homolog	protein-coding
MACS_peak_81	chr1	203573040	203573491	+	130.15	NA	Intergenic	(TCCA)n|Simple_repeat|Simple_repeat	-22650	NM_001001396	493	Hs.343522	NM_001684	ENSG00000058668	ATP2B4	ATP2B2|MXRA1|PMCA4|PMCA4b|PMCA4x	ATPase, Ca++ transporting, plasma membrane 4	protein-coding
MACS_peak_579	chr16	88583467	88583895	+	129.78	NA	intron (NM_153813, intron 4 of 9)	(TGGA)n|Simple_repeat|Simple_repeat	48355	NR_049821	100847057		NR_049821	ENSG00000263456	MIR5189	mir-5189	microRNA 5189	ncRNA
MACS_peak_1270	chr7	1617670	1618184	+	129.34	NA	intron (NR_027328, intron 3 of 3)	(TCCA)n|Simple_repeat|Simple_repeat	8218	NR_021487	114796	Hs.436146	NR_021487	ENSG00000230487	PSMG3-AS1	-	PSMG3 antisense RNA 1 (head to head)	ncRNA
MACS_peak_60	chr1	148241415	148241955	+	129.22	NA	intron (NR_102404, intron 6 of 18).2	intron (NR_102404, intron 6 of 18).2	-39149	NM_001164261	645142	Hs.730589	NM_001164261		PPIAL4D	-	peptidylprolyl isomerase A (cyclophilin A)-like 4D	protein-coding
MACS_peak_1451	chr9	116927800	116928231	+	129.22	NA	intron (NM_032888, intron 2 of 60)	intron (NM_032888, intron 2 of 60)	10190	NM_032888	85301	Hs.494892	NM_032161	ENSG00000196739	COL27A1	STLS	collagen, type XXVII, alpha 1	protein-coding
MACS_peak_864	chr20	47315746	47316888	+	129.12	NA	intron (NM_020820, intron 7 of 39)	intron (NM_020820, intron 7 of 39)	128103	NM_020820	57580	Hs.153310	NM_020820	ENSG00000124126	PREX1	P-REX1	phosphatidylinositol-3,4,5-trisphosphate-dependent Rac exchange factor 1	protein-coding
MACS_peak_702	chr19	30778144	30778614	+	129.00	NA	Intergenic	(TGGA)n|Simple_repeat|Simple_repeat	-84921	NM_014717	9745	Hs.378901	NM_014717	ENSG00000198597	ZNF536	-	zinc finger protein 536	protein-coding
MACS_peak_322	chr12	132890142	132890541	+	128.10	NA	intron (NM_001122636, intron 1 of 10)	(CCCA)n|Simple_repeat|Simple_repeat	15564	NM_001122636	50614	Hs.301062	NM_021808	ENSG00000182870	GALNT9	GALNAC-T9|GALNACT9	polypeptide N-acetylgalactosaminyltransferase 9	protein-coding
MACS_peak_792	chr2	114360570	114360928	+	128.07	NA	intron (NR_024004, intron 1 of 2)	(CCCTAA)n|Simple_repeat|Simple_repeat	545	NR_024004	84771	Hs.712940	NR_024004		DDX11L2	-	DEAD/H (Asp-Glu-Ala-Asp/His) box helicase 11 like 2	pseudo
MACS_peak_764	chr2	33141288	33141701	+	127.94	NA	intron (NR_027099, intron 5 of 5)	(G)n|Simple_repeat|Simple_repeat	-10700	NR_027097	100271832	Hs.743603	NR_027097		LOC100271832	-	uncharacterized LOC100271832	ncRNA
MACS_peak_1050	chr3	179550234	179550652	+	127.37	NA	intron (NM_016559, intron 8 of 14)	(CCTA)n|Simple_repeat|Simple_repeat	-65539	NR_110059	101928790	Hs.667247	NR_110059	ENSG00000244302	PEX5L-AS2	-	PEX5L antisense RNA 2	ncRNA
MACS_peak_1059	chr3	195503437	195503766	+	127.06	NA	intron (NM_138297, intron 1 of 22)	intron (NM_138297, intron 1 of 22)	35243	NM_004532	4585	Hs.369646	NM_004532	ENSG00000145113	MUC4	ASGP|HSA276359|MUC-4	mucin 4, cell surface associated	protein-coding
MACS_peak_1392	chr8	142953303	142953852	+	126.96	NA	Intergenic	G-rich|Low_complexity|Low_complexity	-85903	NR_031636	100302147		NR_031636		MIR1302-7	MIRN1302-7|hsa-mir-1302-7	microRNA 1302-7	ncRNA
MACS_peak_752	chr2	9880159	9880680	+	126.63	NA	Intergenic	(CCCA)n|Simple_repeat|Simple_repeat	-103152	NM_005680	9014	Hs.584833	NM_005680	ENSG00000115750	TAF1B	MGC:9349|RAF1B|RAFI63|SL1|TAFI63	TATA box binding protein (TBP)-associated factor, RNA polymerase I, B, 63kDa	protein-coding
MACS_peak_884	chr20	51040311	51040883	+	126.56	NA	Intergenic	Intergenic	-196780	NR_110038	101927700	Hs.434465	NR_110038	ENSG00000234948	LINC01524	-	long intergenic non-protein coding RNA 1524	ncRNA
MACS_peak_1230	chr6	83279710	83280163	+	126.46	NA	Intergenic	Intergenic	205975	NM_001166392	7162	Hs.82128	NM_006670	ENSG00000146242	TPBG	5T4|5T4AG|M6P1|WAIF1	trophoblast glycoprotein	protein-coding
MACS_peak_1254	chr7	447956	448363	+	126.24	NA	Intergenic	(TCCA)n|Simple_repeat|Simple_repeat	28768	NR_033960	442497	Hs.704269	NR_033960	ENSG00000249574	LOC442497	-	uncharacterized LOC442497	ncRNA
MACS_peak_1499	chr9	138225847	138226400	+	126.12	NA	Intergenic	(TGGA)n|Simple_repeat|Simple_repeat	-8972	NM_173520	157927	Hs.559511	NM_173520		C9orf62	-	chromosome 9 open reading frame 62	protein-coding
MACS_peak_701	chr19	30558769	30559254	+	125.89	NA	Intergenic	(TCCA)n|Simple_repeat|Simple_repeat	125865	NM_003796	8725	Hs.466391	NM_003796	ENSG00000105176	URI1	C19orf2|NNX3|PPP1R19|RMP|URI	URI1, prefoldin-like chaperone	protein-coding
MACS_peak_878	chr20	50072124	50072728	+	125.85	NA	intron (NM_001258297, intron 5 of 9)	(TGGG)n|Simple_repeat|Simple_repeat	-2912	NR_036162	100422889		NR_036162	ENSG00000266761	MIR3194	mir-3194	microRNA 3194	ncRNA
MACS_peak_693	chr19	17977255	17977630	+	125.20	NA	Intergenic	(TCCA)n|Simple_repeat|Simple_repeat	4045	NR_000012	26780	Hs.684118	NR_000012	ENSG00000207166	SNORA68	RNU68|U68	small nucleolar RNA, H/ACA box 68	snoRNA
MACS_peak_833	chr2	238425293	238425599	+	125.10	NA	intron (NM_024101, intron 4 of 15)	(TGGA)n|Simple_repeat|Simple_repeat	5872	NR_106869	102465486		NR_106869	ENSG00000277842	MIR6811	hsa-mir-6811	microRNA 6811	ncRNA
MACS_peak_209	chr11	71125734	71126165	+	124.86	NA	intron (NR_038862, intron 2 of 2)	(TGGA)n|Simple_repeat|Simple_repeat	8451	NR_038862	399923	Hs.128191	NM_001001680	ENSG00000172900	FLJ42102	-	uncharacterized LOC399923	ncRNA
MACS_peak_182	chr11	65190069	65190526	+	124.59	NA	promoter-TSS (NR_131012)	promoter-TSS (NR_131012)	28	NR_028272	283131	Hs.523789	NR_002802		NEAT1	LINC00084|NCRNA00084|TncRNA|VINC	nuclear paraspeckle assembly transcript 1 (non-protein coding)	ncRNA
MACS_peak_892	chr20	56523630	56524217	+	123.77	NA	Intergenic	(TGGA)n|Simple_repeat|Simple_repeat	53473	NR_039757	100616353		NR_039757	ENSG00000263453	MIR4532	mir-4532	microRNA 4532	ncRNA
MACS_peak_739	chr1_gl000192_random	111777	112193	+	123.41	NA	Intergenic	(TCCA)n|Simple_repeat|Simple_repeat	295525	NR_103556	100288805	Hs.648712	NR_049745		HYDIN2	HYDINP1	HYDIN2, axonemal central pair apparatus protein (pseudogene)	pseudo
MACS_peak_1489	chr9	137343932	137344350	+	123.36	NA	Intergenic	(TCCA)n|Simple_repeat|Simple_repeat	45713	NM_001291921	6256	Hs.590886	NM_002957		RXRA	NR2B1	retinoid X receptor alpha	protein-coding
MACS_peak_733	chr19	55893290	55893748	+	123.36	NA	intron (NM_001190764, intron 1 of 1)	(TCCA)n|Simple_repeat|Simple_repeat	2108	NM_001190764	388564	Hs.534672	NM_001190764		TMEM238	-	transmembrane protein 238	protein-coding
MACS_peak_1127	chr5	2584937	2585321	+	123.07	NA	Intergenic	(TGGA)n|Simple_repeat|Simple_repeat	166640	NM_001134222	153572	Hs.282089	NM_033267	ENSG00000170561	IRX2	IRXA2	iroquois homeobox 2	protein-coding
MACS_peak_844	chr20	19904937	19905284	+	122.51	NA	intron (NM_018993, intron 1 of 10)	C-rich|Low_complexity|Low_complexity	34900	NM_018993	54453	Hs.472270	NM_018993	ENSG00000132669	RIN2	MACS|RASSF4	Ras and Rab interactor 2	protein-coding
MACS_peak_1480	chr9	136703761	136704225	+	122.14	NA	intron (NM_003371, intron 3 of 26)	(TGGA)n|Simple_repeat|Simple_repeat	-98916	NM_007101	1757	Hs.198003	NM_007101	ENSG00000123453	SARDH	BPR-2|DMGDHL1|SAR|SARD|SDH	sarcosine dehydrogenase	protein-coding
MACS_peak_1353	chr8	87212157	87212574	+	121.89	NA	Intergenic	Intergenic	30239	NM_138817	157724	Hs.149095	NM_138817	ENSG00000164893	SLC7A13	AGT-1|AGT1|XAT2	solute carrier family 7 (anionic amino acid transporter), member 13	protein-coding
MACS_peak_258	chr12	96049020	96049338	+	121.88	NA	intron (NR_077225, intron 1 of 4)	HAL1-2a_MD|LINE|L1	6148	NR_077225	100132594	Hs.676211	NR_077225	ENSG00000257150	PGAM1P5	-	phosphoglycerate mutase 1 pseudogene 5	pseudo
MACS_peak_971	chr21	47713887	47714615	+	121.84	NA	intron (NM_001314023, intron 3 of 4)	MER87|LTR|ERV1	8007	NM_001314024	54059	Hs.474066	NM_058181	ENSG00000182362	YBEY	C21orf57	ybeY metallopeptidase (putative)	protein-coding
MACS_peak_929	chr20	62118159	62118583	+	121.67	NA	TTS (NM_001958)	TTS (NM_001958)	12297	NM_001958	1917	Hs.433839	NM_001958	ENSG00000101210	EEF1A2	EEF1AL|EF-1-alpha-2|EF1A|EIEE33|HS1|MRD38|STN|STNL	eukaryotic translation elongation factor 1 alpha 2	protein-coding
MACS_peak_197	chr11	69964813	69965206	+	120.99	NA	intron (NR_030691, intron 8 of 24)	(TGGA)n|Simple_repeat|Simple_repeat	33493	NR_030691	55107	Hs.503074	NM_018043	ENSG00000131620	ANO1	DOG1|ORAOV2|TAOS2|TMEM16A	anoctamin 1, calcium activated chloride channel	protein-coding
MACS_peak_648	chr17	70614075	70614429	+	120.89	NA	intron (NR_033876, intron 3 of 4)	intron (NR_033876, intron 3 of 4)	22359	NR_033876	400619	Hs.447555	NR_033876	ENSG00000227036	LINC00511	LCAL5|onco-lncRNA-12	long intergenic non-protein coding RNA 511	ncRNA
MACS_peak_990	chr3	10896460	10896782	+	120.80	NA	intron (NM_014229, intron 5 of 13)	(TGGG)n|Simple_repeat|Simple_repeat	38704	NM_014229	6538	Hs.657405	NM_014229		SLC6A11	GAT-3|GAT3|GAT4	solute carrier family 6 (neurotransmitter transporter), member 11	protein-coding
MACS_peak_588	chr16	89078694	89079244	+	120.66	NA	Intergenic	(TCCA)n|Simple_repeat|Simple_repeat	-35465	NM_005187	863	Hs.513811	NM_005187	ENSG00000129993	CBFA2T3	ETO2|MTG16|MTGR2|ZMYND4	core-binding factor, runt domain, alpha subunit 2; translocated to, 3	protein-coding
MACS_peak_494	chr16	16096858	16097253	+	120.54	NA	intron (NM_004996, intron 1 of 30)	(TGGA)n|Simple_repeat|Simple_repeat	53621	NM_004996	4363	Hs.391464	NM_004996	ENSG00000103222	ABCC1	ABC29|ABCC|GS-X|MRP|MRP1	ATP binding cassette subfamily C member 1	protein-coding
MACS_peak_141	chr10	95307276	95307635	+	120.40	NA	Intergenic	(TGGA)n|Simple_repeat|Simple_repeat	-18967	NM_181745	338557	Hs.661022	NM_181745	ENSG00000186188	FFAR4	BMIQ10|GPR120|GPR129|GT01|O3FAR1|PGR4	free fatty acid receptor 4	protein-coding
MACS_peak_847	chr20	20338350	20338782	+	120.28	NA	intron (NM_015585, intron 26 of 26)	intron (NM_015585, intron 26 of 26)	-10199	NM_002196	3642	Hs.89584	NM_002196	ENSG00000173404	INSM1	IA-1|IA1	insulinoma-associated 1	protein-coding
MACS_peak_930	chr20	62122834	62123228	+	120.28	NA	intron (NM_001958, intron 5 of 7)	(TGGA)n|Simple_repeat|Simple_repeat	7637	NM_001958	1917	Hs.433839	NM_001958	ENSG00000101210	EEF1A2	EEF1AL|EF-1-alpha-2|EF1A|EIEE33|HS1|MRD38|STN|STNL	eukaryotic translation elongation factor 1 alpha 2	protein-coding
MACS_peak_1406	chr8	144952503	144952797	+	120.23	NA	promoter-TSS (NM_031308)	promoter-TSS (NM_031308)	-18	NM_031308	83481	Hs.200412	NM_031308	ENSG00000261150	EPPK1	EPIPL|EPIPL1	epiplakin 1	protein-coding
MACS_peak_551	chr16	85190608	85191088	+	120.20	NA	Intergenic	(TCCA)n|Simple_repeat|Simple_repeat	20092	NR_033984	400548	Hs.592054	NR_033984	ENSG00000278214	LOC400548	-	uncharacterized LOC400548	ncRNA
MACS_peak_384	chr14	105080439	105080914	+	119.91	NA	Intergenic	(TGGA)n|Simple_repeat|Simple_repeat	-9579	NM_001286389	388021	Hs.652298	NM_207379		TMEM179	C14orf90|TMEM179A	transmembrane protein 179	protein-coding
MACS_peak_466	chr16	3601300	3601663	+	119.44	NA	intron (NM_178844, intron 11 of 20)	(TCCA)n|Simple_repeat|Simple_repeat	25924	NR_075083	197358	Hs.592091	NM_178844	ENSG00000167984	NLRC3	CLR16.2|NOD3	NLR family, CARD domain containing 3	protein-coding
MACS_peak_1368	chr8	122669690	122670223	+	119.41	NA	Intergenic	L1PREC2|LINE|L1	-16326	NM_005328	3037	Hs.159226	NM_005328	ENSG00000170961	HAS2	-	hyaluronan synthase 2	protein-coding
MACS_peak_723	chr19	49172772	49173275	+	119.29	NA	intron (NR_004401, intron 3 of 4)	(CACCAT)n|Simple_repeat|Simple_repeat	3315	NM_145807	126147	Hs.326217	NM_145807	ENSG00000142233	NTN5	-	netrin 5	protein-coding
MACS_peak_1250	chr6	169060530	169060737	+	119.16	NA	intron (NM_001166412, intron 11 of 12)	(TTGGGG)n|Simple_repeat|Simple_repeat	218802	NM_001166412	64094	Hs.487200	NM_022138	ENSG00000112562	SMOC2	DTDP1|MST117|MSTP117|MSTP140|SMAP2|bA270C4A.1|bA37D8.1|dJ421D16.1	SPARC related modular calcium binding 2	protein-coding
MACS_peak_365	chr14	96484218	96484660	+	118.99	NA	Intergenic	(TGGA)n|Simple_repeat|Simple_repeat	-21222	NM_001282463	56967	Hs.6434	NM_020215		C14orf132	C14orf88	chromosome 14 open reading frame 132	protein-coding
MACS_peak_609	chr17	19091279	19091675	+	118.27	NA	Intergenic	U3|snRNA|snRNA	-29292	NM_001291905	388436	Hs.677375	NM_001291905		LOC388436	-	uncharacterized protein ENSP00000382042	protein-coding
MACS_peak_319	chr12	132876319	132876635	+	118.17	NA	intron (NM_001122636, intron 1 of 10)	intron (NM_001122636, intron 1 of 10)	24500	NR_024563	100130238	Hs.536338	NR_024563		LOC100130238	-	uncharacterized LOC100130238	ncRNA
MACS_peak_1331	chr7	157222915	157223241	+	118.17	NA	Intergenic	(TCCA)n|Simple_repeat|Simple_repeat	-35847	NR_110157	101927914	Hs.623826	NR_110157	ENSG00000234210	LOC101927914	-	uncharacterized LOC101927914	ncRNA
MACS_peak_1391	chr8	142864378	142864676	+	118.16	NA	Intergenic	(TCCA)n|Simple_repeat|Simple_repeat	3147	NR_031636	100302147		NR_031636		MIR1302-7	MIRN1302-7|hsa-mir-1302-7	microRNA 1302-7	ncRNA
MACS_peak_147	chr10	115613898	115614328	+	118.08	NA	promoter-TSS (NM_001271816)	promoter-TSS (NM_001271816)	50	NM_001271816	9937	Hs.1560	NM_014881	ENSG00000198924	DCLRE1A	PSO2|SNM1|SNM1A	DNA cross-link repair 1A	protein-coding
MACS_peak_169	chr11	12662562	12662738	+	117.85	NA	Intergenic	(CCA)n|Simple_repeat|Simple_repeat	-33319	NM_021961	7003	Hs.655331	NM_021961	ENSG00000187079	TEAD1	AA|NTEF-1|REF1|TCF-13|TCF13|TEAD-1|TEF-1	TEA domain family member 1 (SV40 transcriptional enhancer factor)	protein-coding
MACS_peak_236	chr12	6473017	6473339	+	117.59	NA	intron (NM_001038, intron 2 of 12)	CpG	11212	NM_001159576	6337	Hs.591047	NM_001038	ENSG00000111319	SCNN1A	BESC2|ENaCa|ENaCalpha|SCNEA|SCNN1	sodium channel, non voltage gated 1 alpha subunit	protein-coding
MACS_peak_1282	chr7	30842362	30842771	+	117.40	NA	intron (NR_037598, intron 7 of 19)	(CCAA)n|Simple_repeat|Simple_repeat	31533	NM_032222	84182	Hs.660192	NM_032222	ENSG00000106125	FAM188B	C7orf67	family with sequence similarity 188, member B	protein-coding
MACS_peak_1193	chr5	176256117	176256528	+	117.00	NA	intron (NM_133369, intron 1 of 14)	(TGGA)n|Simple_repeat|Simple_repeat	18762	NM_133369	90249	Hs.33191	NM_133369	ENSG00000113763	UNC5A	UNC5H1	unc-5 netrin receptor A	protein-coding
MACS_peak_943	chr21	37629934	37630308	+	116.88	NA	intron (NM_005128, intron 23 of 36)	(TAGG)n|Simple_repeat|Simple_repeat	-62366	NM_015358	23515	Hs.421150	NM_015358	ENSG00000159256	MORC3	NXP2|ZCW5|ZCWCC3	MORC family CW-type zinc finger 3	protein-coding
MACS_peak_868	chr20	48128479	48128871	+	116.36	NA	intron (NM_000961, intron 8 of 9)	(TGGA)n|Simple_repeat|Simple_repeat	-29494	NM_004975	3745	Hs.84244	NM_004975		KCNB1	DRK1|EIEE26|KV2.1|h-DRK1	potassium channel, voltage gated Shab related subfamily B, member 1	protein-coding
MACS_peak_1107	chr4	154050529	154050807	+	116.19	NA	Intergenic	(CCA)n|Simple_repeat|Simple_repeat	-23602	NM_001130067	23321	Hs.435711	NM_015271	ENSG00000109654	TRIM2	CMT2R|RNF86	tripartite motif containing 2	protein-coding
MACS_peak_323	chr12	132978021	132978300	+	115.99	NA	Intergenic	(TCCA)n|Simple_repeat|Simple_repeat	71724	NR_120467	101928416		NR_120467	ENSG00000255916	LOC101928416	-	uncharacterized LOC101928416	ncRNA
MACS_peak_1445	chr9	115657960	115658278	+	115.67	NA	Intergenic	(TCCA)n|Simple_repeat|Simple_repeat	-4926	NM_033051	57864	Hs.512668	NM_033051	ENSG00000119457	SLC46A2	Ly110|TSCOT	solute carrier family 46, member 2	protein-coding
MACS_peak_957	chr21	43796459	43796772	+	115.62	NA	intron (NR_046020, intron 11 of 12)	intron (NR_046020, intron 11 of 12)	-9971	NM_003225	7031	Hs.162807	NM_003225	ENSG00000160182	TFF1	BCEI|D21S21|HP1.A|HPS2|pNR-2|pS2	trefoil factor 1	protein-coding
MACS_peak_1484	chr9	136868370	136868713	+	115.60	NA	Intergenic	(TCCA)n|Simple_repeat|Simple_repeat	-11095	NM_001134398	7410	Hs.369921	NM_003371	ENSG00000160293	VAV2	VAV-2	vav 2 guanine nucleotide exchange factor	protein-coding
MACS_peak_1066	chr3	197765631	197766064	+	115.41	NA	non-coding (NR_026787, exon 16 of 16)	non-coding (NR_026787, exon 16 of 16)	491	NR_046669	100873947	Hs.637166	NR_046669	ENSG00000232832	LMLN-AS1	-	LMLN antisense RNA 1	ncRNA
MACS_peak_204	chr11	70638286	70638629	+	115.38	NA	intron (NM_012309, intron 11 of 22)	(CCAA)n|Simple_repeat|Simple_repeat	-70438	NR_073536	220070	Hs.326766	NM_145308	ENSG00000171671	SHANK2-AS3	C11orf76	SHANK2 antisense RNA 3	ncRNA
MACS_peak_668	chr17	81058356	81058817	+	115.19	NA	Intergenic	Intergenic	21019	NM_001004431	284207	Hs.378821	NM_001004431	ENSG00000176845	METRNL	-	meteorin, glial cell differentiation regulator-like	protein-coding
MACS_peak_869	chr20	48208607	48209072	+	115.17	NA	Intergenic	(TCCA)n|Simple_repeat|Simple_repeat	-24132	NM_000961	5740	Hs.302085	NM_000961	ENSG00000124212	PTGIS	CYP8|CYP8A1|PGIS|PTGI	prostaglandin I2 (prostacyclin) synthase	protein-coding
MACS_peak_996	chr3	13659160	13659580	+	115.09	NA	promoter-TSS (NR_132775)	promoter-TSS (NR_132775)	-511	NR_132775	106635526		NR_132775		SNORA93	-	small nucleolar RNA, H/ACA box 93	snoRNA
MACS_peak_1378	chr8	135344806	135345140	+	115.04	NA	Intergenic	(CCCA)n|Simple_repeat|Simple_repeat	-265341	NR_002438	594840	Hs.626298	NR_002438	ENSG00000248492	ZFAT-AS1	NCRNA00070|SAS-ZFAT|ZFAT-AS|ZFATAS	ZFAT antisense RNA 1	ncRNA
MACS_peak_212	chr11	71365541	71365865	+	114.92	NA	Intergenic	(TCCA)n|Simple_repeat|Simple_repeat	-71782	NM_001005405	440051	Hs.679617	NM_001005405	ENSG00000204571	KRTAP5-11	KRTAP5-5|KRTAP5-6|KRTAP5.11	keratin associated protein 5-11	protein-coding
MACS_peak_1069	chr3	197901086	197901443	+	114.91	NA	intron (NM_001145248, intron 6 of 6)	(TTAGGG)n|Simple_repeat|Simple_repeat	22027	NM_001145248	728262	Hs.744675	NM_001145248		FAM157A	-	family with sequence similarity 157, member A	protein-coding
MACS_peak_582	chr16	88585857	88586194	+	114.30	NA	intron (NM_153813, intron 4 of 9)	(TGGA)n|Simple_repeat|Simple_repeat	50699	NR_049821	100847057		NR_049821	ENSG00000263456	MIR5189	mir-5189	microRNA 5189	ncRNA
MACS_peak_1244	chr6	151937315	151937706	+	113.90	NA	intron (NM_025059, intron 10 of 10)	intron (NM_025059, intron 10 of 10)	-74121	NM_001122742	2099	Hs.208124	NM_000125	ENSG00000091831	ESR1	ER|ESR|ESRA|ESTRR|Era|NR3A1	estrogen receptor 1	protein-coding
MACS_peak_1121	chr5	1166639	1166919	+	113.89	NA	Intergenic	(TCCA)n|Simple_repeat|Simple_repeat	11941	NR_109911	101928857	Hs.593732	NR_109911	ENSG00000249201	CTD-3080P12.3	-	uncharacterized LOC101928857	ncRNA
MACS_peak_1123	chr5	2146486	2147190	+	113.60	NA	Intergenic	Intergenic	165477	NR_104616	100506858	Hs.445071	NR_104616		LOC100506858	-	uncharacterized LOC100506858	ncRNA
MACS_peak_1180	chr5	172880278	172880544	+	113.42	NA	Intergenic	Intergenic	105953	NR_107023	102465862		NR_107023	ENSG00000274994	MIR8056	hsa-mir-8056	microRNA 8056	ncRNA
MACS_peak_1211	chr6	2834605	2835022	+	113.19	NA	intron (NR_073111, intron 7 of 7)	(TCCA)n|Simple_repeat|Simple_repeat	7470	NR_073111	1992	Hs.381167	NM_030666	ENSG00000021355	SERPINB1	EI|ELANH2|HEL-S-27|HEL57|LEI|M/NEI|MNEI|PI-2|PI2	serpin peptidase inhibitor, clade B (ovalbumin), member 1	protein-coding
MACS_peak_679	chr19	245572	245963	+	113.08	NA	Intergenic	(CCCTAA)n|Simple_repeat|Simple_repeat	-43558	NR_028324	399844	Hs.356758	NM_001004321		LINC01002	-	long intergenic non-protein coding RNA 1002	ncRNA
MACS_peak_211	chr11	71151251	71151626	+	112.89	NA	intron (NM_001360, intron 6 of 8)	(TGGG)n|Simple_repeat|Simple_repeat	8039	NM_001163817	1717	Hs.503134	NM_001360	ENSG00000172893	DHCR7	SLOS	7-dehydrocholesterol reductase	protein-coding
MACS_peak_979	chr22	29209716	29210068	+	112.88	NA	Intergenic	Intergenic	-13332	NM_005080	7494	Hs.437638	NM_005080	ENSG00000100219	XBP1	TREB-5|TREB5|XBP-1|XBP2	X-box binding protein 1	protein-coding
MACS_peak_153	chr10	132182578	132182933	+	112.76	NA	Intergenic	(CCAA)n|Simple_repeat|Simple_repeat	248116	NM_001199868	10539	Hs.42644	NM_006541	ENSG00000108010	GLRX3	GLRX4|GRX3|GRX4|PICOT|TXNL2|TXNL3	glutaredoxin 3	protein-coding
MACS_peak_371	chr14	100394123	100394587	+	112.65	NA	intron (NM_001008707, intron 18 of 22)	(TGG)n|Simple_repeat|Simple_repeat	134610	NM_001008707	2009	Hs.12451	NM_004434	ENSG00000066629	EML1	ELP79|EMAP|EMAPL|HuEMAP	echinoderm microtubule associated protein like 1	protein-coding
MACS_peak_858	chr20	45353037	45353499	+	112.54	NA	intron (NM_030777, intron 1 of 4)	(TGGA)n|Simple_repeat|Simple_repeat	14989	NM_030777	81031	Hs.305971	NM_030777	ENSG00000197496	SLC2A10	ATS|GLUT10	solute carrier family 2 (facilitated glucose transporter), member 10	protein-coding
MACS_peak_425	chr15	79730820	79731105	+	112.54	NA	intron (NM_015206, intron 1 of 3)	(TGGG)n|Simple_repeat|Simple_repeat	6104	NM_015206	23251	Hs.301654	NM_015206	ENSG00000169330	KIAA1024	-	KIAA1024	protein-coding
MACS_peak_1435	chr9	101199940	101200458	+	112.27	NA	intron (NM_005458, intron 7 of 18)	(TCCA)n|Simple_repeat|Simple_repeat	-182196	NM_001267571	55357	Hs.371016	NM_018421	ENSG00000095383	TBC1D2	PARIS-1|PARIS1|TBC1D2A	TBC1 domain family, member 2	protein-coding
MACS_peak_35	chr1	31127987	31128553	+	111.56	NA	Intergenic	(TGG)n|Simple_repeat|Simple_repeat	-63349	NR_034182	100129196	Hs.659751	NR_034182	ENSG00000186056	MATN1-AS1	-	MATN1 antisense RNA 1	ncRNA
MACS_peak_234	chr12	4647534	4647972	+	111.39	NA	promoter-TSS (NM_001130862)	promoter-TSS (NM_001130862)	-79	NM_001304811	57102	Hs.302977	NM_020374	ENSG00000047621	C12orf4	-	chromosome 12 open reading frame 4	protein-coding
MACS_peak_48	chr1	111119183	111119578	+	111.15	NA	Intergenic	L2a|LINE|L2	29595	NM_004974	3737	Hs.248139	NM_004974	ENSG00000177301	KCNA2	EIEE32|HBK5|HK4|HUKIV|KV1.2|MK2|NGK1|RBK2	potassium channel, voltage gated shaker related subfamily A, member 2	protein-coding
MACS_peak_74	chr1	177417840	177418233	+	111.01	NA	Intergenic	L2c|LINE|L2	97314	NR_126001	102724661	Hs.146628	NR_126001		LOC102724661	-	uncharacterized LOC102724661	ncRNA
MACS_peak_468	chr16	4185520	4185871	+	110.72	NA	Intergenic	(TGGA)n|Simple_repeat|Simple_repeat	-19509	NM_001116	115	Hs.391860	NM_001116	ENSG00000162104	ADCY9	AC9|ACIX	adenylate cyclase 9	protein-coding
MACS_peak_924	chr20	61789451	61789905	+	110.59	NA	Intergenic	(TGGA)n|Simple_repeat|Simple_repeat	-20174	NR_029670	406909		NR_029670	ENSG00000207598	MIR124-3	MIRN124-3|MIRN124A3|mir-124-3	microRNA 124-3	ncRNA
MACS_peak_1352	chr8	86853055	86853405	+	110.53	NA	Intergenic	Intergenic	-13059	NR_003594	100288527	Hs.535056	NR_003594		REXO1L2P	-	REX1, RNA exonuclease 1 homolog-like 2, pseudogene	pseudo
MACS_peak_118	chr10	6301234	6301545	+	110.43	NA	Intergenic	(TCCA)n|Simple_repeat|Simple_repeat	56549	NM_001314063	5209	Hs.195471	NM_004566	ENSG00000170525	PFKFB3	IPFK2|PFK2|iPFK-2	6-phosphofructo-2-kinase/fructose-2,6-biphosphatase 3	protein-coding
MACS_peak_741	chr2	856583	856972	+	110.27	NA	intron (NR_033880, intron 1 of 3)	C-rich|Low_complexity|Low_complexity	7335	NR_033880	339822	Hs.651879	NR_033880	ENSG00000237667	LINC01115	-	long intergenic non-protein coding RNA 1115	ncRNA
MACS_peak_965	chr21	46927882	46928293	+	110.27	NA	intron (NM_130444, intron 38 of 41)	(TGGG)n|Simple_repeat|Simple_repeat	26455	NM_001205207	6573	Hs.84190	NM_003056	ENSG00000173638	SLC19A1	CHMD|FOLT|IFC1|REFC|RFC1	solute carrier family 19 (folate transporter), member 1	protein-coding
MACS_peak_977	chr22	27874217	27874477	+	110.26	NA	Intergenic	(GTTTG)n|Simple_repeat|Simple_repeat	323139	NM_002430	4330	Hs.268515	NM_002430	ENSG00000169184	MN1	MGCR|MGCR1|MGCR1-PEN|dJ353E16.2	meningioma (disrupted in balanced translocation) 1	protein-coding
MACS_peak_275	chr12	117226923	117227291	+	109.82	NA	intron (NM_032814, intron 7 of 10)	(TGGA)n|Simple_repeat|Simple_repeat	51011	NM_001109903	84900	Hs.437195	NM_032814	ENSG00000135119	RNFT2	TMEM118	ring finger protein, transmembrane 2	protein-coding
MACS_peak_56	chr1	142536861	142539849	+	109.74	NA	Intergenic	(GAATG)n|Satellite|Satellite	175250	NR_046228	100874392	Hs.648245	NR_046228		ANKRD20A12P	-	ankyrin repeat domain 20 family, member A12, pseudogene	pseudo
MACS_peak_1533	chrY	10055323	10055493	+	109.71	NA	Intergenic	ALR/Alpha|Satellite|centr	307001	NR_001540	252955	Hs.522846	NR_001540	ENSG00000239225	TTTY23	NCRNA00148|TTTY23B	testis-specific transcript, Y-linked 23 (non-protein coding)	ncRNA
MACS_peak_686	chr19	13705829	13706123	+	109.48	NA	Intergenic	(TGGA)n|Simple_repeat|Simple_repeat	-88702	NM_023035	773	Hs.501632	NM_000068	ENSG00000141837	CACNA1A	APCA|BI|CACNL1A4|CAV2.1|EA2|FHM|HPCA|MHP|MHP1|SCA6	calcium channel, voltage-dependent, P/Q type, alpha 1A subunit	protein-coding
MACS_peak_138	chr10	44668981	44669259	+	109.48	NA	Intergenic	Intergenic	-119078	NM_001258000	100130539	Hs.694626	NM_001258000	ENSG00000277288	C10orf142	-	chromosome 10 open reading frame 142	protein-coding
MACS_peak_1307	chr7	100026199	100026596	+	109.47	NA	promoter-TSS (NM_001194992)	promoter-TSS (NM_001194992)	-16	NM_001194992	56257	Hs.178011	NM_019606	ENSG00000146834	MEPCE	BCDIN3	methylphosphate capping enzyme	protein-coding
MACS_peak_304	chr12	131889331	131889664	+	109.36	NA	Intergenic	(TCCA)n|Simple_repeat|Simple_repeat	57482	NR_103736	338797	Hs.592007	NM_001025466		LOC338797	-	uncharacterized LOC338797	ncRNA
MACS_peak_1086	chr4	6513440	6513797	+	109.15	NA	intron (NM_001206994, intron 2 of 9)	(TGG)n|Simple_repeat|Simple_repeat	-39292	NM_020416	5522	Hs.479069	NM_020416	ENSG00000074211	PPP2R2C	B55-GAMMA|IMYPNO|IMYPNO1|PR52|PR55G	protein phosphatase 2, regulatory subunit B, gamma	protein-coding
MACS_peak_213	chr11	72497489	72497843	+	108.56	NA	intron (NM_006645, intron 1 of 6)	intron (NM_006645, intron 1 of 6)	3091	NR_039841	100616410		NR_039841	ENSG00000265064	MIR4692	-	microRNA 4692	ncRNA
MACS_peak_584	chr16	88993506	88993805	+	108.54	NA	intron (NM_005187, intron 1 of 11)	intron (NM_005187, intron 1 of 11)	-12792	NM_001290330	100129697	Hs.689377	NM_001290330		LOC100129697	-	uncharacterized LOC100129697	protein-coding
MACS_peak_477	chr16	6050514	6050815	+	108.44	NA	Intergenic	(TGGG)n|Simple_repeat|Simple_repeat	-18468	NM_001142333	54715	Hs.459842	NM_018723	ENSG00000078328	RBFOX1	2BP1|A2BP1|FOX-1|FOX1|HRNBP1	RNA binding protein, fox-1 homolog (C. elegans) 1	protein-coding
MACS_peak_748	chr2	3319549	3319850	+	108.44	NA	intron (NM_003310, intron 3 of 8)	HAL1-2a_MD|LINE|L1	61954	NM_003310	7260	Hs.502770	NM_003310	ENSG00000032389	TSSC1	-	tumor suppressing subtransferable candidate 1	protein-coding
MACS_peak_1202	chr5	180061684	180061986	+	108.19	NA	intron (NM_182925, intron 1 of 29)	(TGGA)n|Simple_repeat|Simple_repeat	14789	NM_002020	2324	Hs.646917	NM_002020	ENSG00000037280	FLT4	FLT41|LMPH1A|PCL|VEGFR3	fms-related tyrosine kinase 4	protein-coding
MACS_peak_541	chr16	83757519	83757938	+	107.77	NA	intron (NM_001220488, intron 11 of 14)	(TGGA)n|Simple_repeat|Simple_repeat	79853	NR_120308	102724163		NR_120308	ENSG00000260228	LOC102724163	-	uncharacterized LOC102724163	ncRNA
MACS_peak_85	chr1	205719408	205719868	+	107.51	NA	promoter-TSS (NM_022731)	promoter-TSS (NM_022731)	-266	NM_022731	64710	Hs.213061	NM_022731	ENSG00000069275	NUCKS1	JC7|NUCKS	nuclear casein kinase and cyclin-dependent kinase substrate 1	protein-coding
MACS_peak_469	chr16	4202312	4202687	+	107.48	NA	Intergenic	MamRep605|Unknown|Unknown	-36313	NM_001116	115	Hs.391860	NM_001116	ENSG00000162104	ADCY9	AC9|ACIX	adenylate cyclase 9	protein-coding
MACS_peak_219	chr11	76889210	76889519	+	106.90	NA	intron (NM_001127180, intron 19 of 48)	(TCCA)n|Simple_repeat|Simple_repeat	50048	NM_001127180	4647	Hs.370421	NM_000260	ENSG00000137474	MYO7A	DFNA11|DFNB2|MYOVIIA|MYU7A|NSRD2|USH1B	myosin VIIA	protein-coding
MACS_peak_535	chr16	80750132	80750505	+	106.87	NA	intron (NM_152342, intron 1 of 6)	(TGGA)n|Simple_repeat|Simple_repeat	87857	NM_152342	124359	Hs.60257	NM_152342	ENSG00000166446	CDYL2	PCCP1	chromodomain protein, Y-like 2	protein-coding
MACS_peak_767	chr2	47106497	47106826	+	106.85	NA	Intergenic	(TGGA)n|Simple_repeat|Simple_repeat	36346	NM_139279	90411	Hs.662152	NM_139279	ENSG00000180398	MCFD2	F5F8D|F5F8D2|LMAN1IP|SDNSF	multiple coagulation factor deficiency 2	protein-coding
MACS_peak_423	chr15	77991765	77992179	+	106.77	NA	intron (NM_001301192, intron 2 of 4)	intron (NM_001301192, intron 2 of 4)	-3135	NM_001301199	84894	Hs.656765	NM_032808	ENSG00000169783	LINGO1	LERN1|LRRN6A|UNQ201	leucine rich repeat and Ig domain containing 1	protein-coding
MACS_peak_460	chr16	1043693	1044281	+	106.77	NA	Intergenic	(CCCA)n|Simple_repeat|Simple_repeat	12179	NM_014587	30812	Hs.243678	NM_014587	ENSG00000005513	SOX8	-	SRY box 8	protein-coding
MACS_peak_958	chr21	43909188	43909529	+	106.57	NA	intron (NM_080860, intron 3 of 8)	(TTGG)n|Simple_repeat|Simple_repeat	7106	NM_001286506	89765	Hs.661069	NM_080860	ENSG00000160188	RSPH1	CT79|RSP44|RSPH10A|TSA2|TSGA2	radial spoke head 1 homolog (Chlamydomonas)	protein-coding
MACS_peak_518	chr16	29281904	29282179	+	106.20	NA	Intergenic	(TGGA)n|Simple_repeat|Simple_repeat	-31567	NR_002939	440352	Hs.658149	NR_002939		SNX29P2	RUNDC2C	sorting nexin 29 pseudogene 2	pseudo
MACS_peak_915	chr20	60640882	60641449	+	105.58	NA	promoter-TSS (NM_003185)	promoter-TSS (NM_003185)	-299	NM_003185	6874	Hs.18857	NM_003185	ENSG00000130699	TAF4	TAF2C|TAF2C1|TAF4A|TAFII130|TAFII135	TAF4 RNA polymerase II, TATA box binding protein (TBP)-associated factor, 135kDa	protein-coding
MACS_peak_1326	chr7	152761578	152761966	+	105.52	NA	Intergenic	(TCCA)n|Simple_repeat|Simple_repeat	304938	NR_073000	57180	Hs.647117	NM_020445	ENSG00000133627	ACTR3B	ARP11|ARP3BETA	ARP3 actin-related protein 3 homolog B (yeast)	protein-coding
MACS_peak_906	chr20	59793097	59793694	+	105.40	NA	Intergenic	Intergenic	-34087	NM_001794	1002	Hs.473231	NM_001794	ENSG00000179242	CDH4	CAD4|R-CAD|RCAD	cadherin 4, type 1, R-cadherin (retinal)	protein-coding
MACS_peak_363	chr14	95711703	95712292	+	105.23	NA	intron (NM_024734, intron 1 of 12)	(TGGA)n|Simple_repeat|Simple_repeat	74248	NM_024734	79789	Hs.301478	NM_024734	ENSG00000165959	CLMN	-	calmin (calponin-like, transmembrane)	protein-coding
MACS_peak_1407	chr8	145288227	145288541	+	105.23	NA	intron (NM_001288814, intron 13 of 41)	intron (NM_001288814, intron 13 of 41)	29256	NR_107057	102465906		NR_107057	ENSG00000277158	MIR7112	MIR7112-1|MIR7112-2|hsa-mir-7112|hsa-mir-7112-1|hsa-mir-7112-2	microRNA 7112	ncRNA
MACS_peak_454	chr16	69746	69992	+	104.93	NA	Intergenic	(CCCTAA)n|Simple_repeat|Simple_repeat	-2750	NR_128720	103504738		NR_128720	ENSG00000278739	MIR6859-4	hsa-mir-6859-4	microRNA 6859-4	ncRNA
MACS_peak_562	chr16	87558018	87558578	+	104.60	NA	Intergenic	(TTAGGG)n|Simple_repeat|Simple_repeat	30505	NR_110943	101928737	Hs.579009	NR_110943	ENSG00000260750	LOC101928737	-	uncharacterized LOC101928737	ncRNA
MACS_peak_1366	chr8	113007243	113007542	+	104.56	NA	Intergenic	Intergenic	-648330	NR_031745	100302225		NR_031745	ENSG00000238399	MIR2053	hsa-mir-2053	microRNA 2053	ncRNA
MACS_peak_125	chr10	11325742	11326238	+	104.44	NA	intron (NM_006561, intron 8 of 14)	(TGAG)n|Simple_repeat|Simple_repeat	60683	NR_126062	414196	Hs.729598	NM_001012713		CELF2-AS1	C10orf31	CELF2 antisense RNA 1	ncRNA
MACS_peak_502	chr16	22172704	22173022	+	104.31	NA	Intergenic	(TGGA)n|Simple_repeat|Simple_repeat	-44729	NM_013302	29904	Hs.498892	NM_013302	ENSG00000103319	EEF2K	HSU93850|eEF-2K	eukaryotic elongation factor 2 kinase	protein-coding
MACS_peak_294	chr12	128365262	128365478	+	104.24	NA	promoter-TSS (NR_033987)	promoter-TSS (NR_033987)	-792	NR_033987	400087	Hs.524846	NR_033987	ENSG00000256597	FLJ37505	-	uncharacterized LOC400087	ncRNA
MACS_peak_581	chr16	88585381	88585838	+	103.87	NA	intron (NM_153813, intron 4 of 9)	(TGGA)n|Simple_repeat|Simple_repeat	50283	NR_049821	100847057		NR_049821	ENSG00000263456	MIR5189	mir-5189	microRNA 5189	ncRNA
MACS_peak_1446	chr9	115825175	115825745	+	103.80	NA	Intergenic	L1MA9|LINE|L1	-6389	NM_001282515	7539	Hs.150406	NM_003408	ENSG00000136866	ZFP37	ZNF906|zfp-37	ZFP37 zinc finger protein	protein-coding
MACS_peak_511	chr16	27150349	27150774	+	103.65	NA	Intergenic	(TGG)n|Simple_repeat|Simple_repeat	-64246	NM_024773	79831	Hs.145717	NM_024773	ENSG00000155666	KDM8	JMJD5	lysine (K)-specific demethylase 8	protein-coding
MACS_peak_862	chr20	47249790	47250814	+	103.47	NA	intron (NM_020820, intron 33 of 39)	MER5B|DNA|hAT-Charlie	194118	NM_020820	57580	Hs.153310	NM_020820	ENSG00000124126	PREX1	P-REX1	phosphatidylinositol-3,4,5-trisphosphate-dependent Rac exchange factor 1	protein-coding
MACS_peak_1301	chr7	97543003	97543483	+	103.43	NA	Intergenic	(TGGA)n|Simple_repeat|Simple_repeat	-41389	NM_001673	440	Hs.489207	NM_001673	ENSG00000070669	ASNS	ASNSD|TS11	asparagine synthetase (glutamine-hydrolyzing)	protein-coding
MACS_peak_703	chr19	31783742	31784064	+	103.37	NA	intron (NM_020856, intron 1 of 1)	(TCCA)n|Simple_repeat|Simple_repeat	56287	NM_020856	57616	Hs.278436	NM_020856	ENSG00000121297	TSHZ3	TSH3|ZNF537	teashirt zinc finger homeobox 3	protein-coding
MACS_peak_1163	chr5	142627064	142627352	+	102.88	NA	Intergenic	(TGGA)n|Simple_repeat|Simple_repeat	55143	NR_046816	100874372	Hs.666717	NR_046816	ENSG00000230789	ARHGAP26-IT1	-	ARHGAP26 intronic transcript 1	ncRNA
MACS_peak_690	chr19	16242604	16243046	+	102.75	NA	intron (NM_005370, intron 7 of 7)	(TGGA)n|Simple_repeat|Simple_repeat	-2013	NM_001291274	84941	Hs.631617	NM_032855	ENSG00000196684	HSH2D	ALX|HSH2	hematopoietic SH2 domain containing	protein-coding
MACS_peak_1207	chr5	180472992	180473200	+	102.68	NA	intron (NM_001308245, intron 2 of 10)	C-rich|Low_complexity|Low_complexity	-2612	NR_107056	102465882		NR_107056	ENSG00000277912	MIR8089	hsa-mir-8089	microRNA 8089	ncRNA
MACS_peak_956	chr21	43687710	43688018	+	102.60	NA	intron (NM_207628, intron 4 of 16)	(GTCTG)n|Simple_repeat|Simple_repeat	47842	NM_003226	7033	Hs.82961	NM_003226	ENSG00000160180	TFF3	ITF|P1B|TFI	trefoil factor 3	protein-coding
MACS_peak_824	chr2	218673862	218674250	+	102.45	NA	intron (NM_001308022, intron 28 of 30)	(TGGA)n|Simple_repeat|Simple_repeat	-52740	NR_026597	729582	Hs.572788	NR_026597		DIRC3	-	disrupted in renal carcinoma 3	ncRNA
MACS_peak_22	chr1	16840496	16840787	+	102.26	NA	Intergenic	U1|snRNA|snRNA	-21445	NR_023386	114819	Hs.597881	NR_023386	ENSG00000080947	CROCCP3	CROCCL2|dJ798A10.2	ciliary rootlet coiled-coil, rootletin pseudogene 3	pseudo
MACS_peak_278	chr12	118320500	118320828	+	102.00	NA	intron (NM_173598, intron 1 of 19)	(TCCA)n|Simple_repeat|Simple_repeat	85364	NM_173598	283455	Hs.375836	NM_173598	ENSG00000171435	KSR2	-	kinase suppressor of ras 2	protein-coding
MACS_peak_1135	chr5	14403799	14404214	+	101.80	NA	intron (NM_007118, intron 31 of 56)	(TGG)n|Simple_repeat|Simple_repeat	-177885	NM_019018	54491	Hs.155085	NM_019018		FAM105A	NET20	family with sequence similarity 105, member A	protein-coding
MACS_peak_414	chr15	70595495	70595824	+	101.77	NA	Intergenic	(TGGA)n|Simple_repeat|Simple_repeat	-205403	NM_001105192	7090	Hs.287362	NM_005078	ENSG00000140332	TLE3	ESG|ESG3|GRG3|HsT18976	transducin-like enhancer of split 3	protein-coding
MACS_peak_791	chr2	114360143	114360556	+	101.50	NA	intron (NR_024004, intron 1 of 2)	(TTAGGG)n|Simple_repeat|Simple_repeat	945	NR_024004	84771	Hs.712940	NR_024004		DDX11L2	-	DEAD/H (Asp-Glu-Ala-Asp/His) box helicase 11 like 2	pseudo
MACS_peak_283	chr12	121425939	121426062	+	101.41	NA	intron (NM_001306179, intron 1 of 9)	(TCCA)n|Simple_repeat|Simple_repeat	9629	NM_001306179	6927	Hs.654455	NM_000545	ENSG00000135100	HNF1A	HNF-1A|HNF1|IDDM20|LFB1|MODY3|TCF-1|TCF1	HNF1 homeobox A	protein-coding
MACS_peak_747	chr2	3186778	3187113	+	101.40	NA	Intergenic	(TCCA)n|Simple_repeat|Simple_repeat	-57147	NR_110228	101927554	Hs.638446	NR_110228	ENSG00000234423	LINC01250	-	long intergenic non-protein coding RNA 1250	ncRNA
MACS_peak_1389	chr8	142072579	142072928	+	101.21	NA	Intergenic	(TAGG)n|Simple_repeat|Simple_repeat	-61341	NM_001199649	5747	Hs.395482	NM_005607	ENSG00000169398	PTK2	FADK|FAK|FAK1|FRNK|PPP1R71|p125FAK|pp125FAK	protein tyrosine kinase 2	protein-coding
MACS_peak_108	chr10	2442301	2442621	+	100.99	NA	Intergenic	(CAGCC)n|Simple_repeat|Simple_repeat	-85193	NR_038884	399708	Hs.521270	NR_038884		LINC00701	-	long intergenic non-protein coding RNA 701	ncRNA
MACS_peak_625	chr17	38804042	38804312	+	100.99	NA	promoter-TSS (NM_003079)	promoter-TSS (NM_003079)	-74	NM_003079	6605	Hs.743978	NM_003079		SMARCE1	BAF57	SWI/SNF related, matrix associated, actin dependent regulator of chromatin, subfamily e, member 1	protein-coding
MACS_peak_1507	chr9	139944489	139944752	+	100.99	NA	intron (NM_001246, intron 6 of 8)	intron (NM_001246, intron 6 of 8)	3883	NM_203468	954	Hs.123036	NM_001246	ENSG00000054179	ENTPD2	CD39L1|NTPDase-2	ectonucleoside triphosphate diphosphohydrolase 2	protein-coding
MACS_peak_14	chr1	7507894	7508190	+	100.92	NA	intron (NM_015215, intron 5 of 22)	intron (NM_015215, intron 5 of 22)	-323287	NM_004781	9341	Hs.66708	NM_004781	ENSG00000049245	VAMP3	CEB	vesicle associated membrane protein 3	protein-coding
MACS_peak_165	chr11	1691710	1692080	+	100.80	NA	Intergenic	(GTGTG)n|Simple_repeat|Simple_repeat	5066	NR_026643	387742	Hs.567908	NM_001014374	ENSG00000205866	FAM99A	-	family with sequence similarity 99, member A (non-protein coding)	ncRNA
MACS_peak_571	chr16	88278080	88278387	+	100.46	NA	Intergenic	(TGGA)n|Simple_repeat|Simple_repeat	50346	NR_110944	101928880	Hs.634835	NR_110944	ENSG00000260420	LOC101928880	LA16c-444G7.2	uncharacterized LOC101928880	ncRNA
MACS_peak_243	chr12	45929550	45929886	+	100.39	NA	Intergenic	(TCCA)n|Simple_repeat|Simple_repeat	191986	NR_028408	400027	Hs.597122	NR_028408		LINC00938	-	long intergenic non-protein coding RNA 938	ncRNA
MACS_peak_199	chr11	70040097	70040563	+	100.26	NA	Intergenic	(TGGA)n|Simple_repeat|Simple_repeat	-8939	NM_003824	8772	Hs.86131	NM_003824	ENSG00000168040	FADD	GIG3|MORT1	Fas (TNFRSF6)-associated via death domain	protein-coding
MACS_peak_1397	chr8	143577391	143577828	+	100.16	NA	intron (NM_001702, intron 16 of 29)	(TGGA)n|Simple_repeat|Simple_repeat	32232	NM_001702	575	Hs.194654	NM_001702	ENSG00000181790	ADGRB1	BAI1|GDAIF	adhesion G protein-coupled receptor B1	protein-coding
MACS_peak_1363	chr8	103613123	103613533	+	99.86	NA	Intergenic	CpG	49480	NM_024410	4956	Hs.159274	NM_024410	ENSG00000155087	ODF1	CT133|HSPB10|ODF|ODF2|ODF27|ODFP|ODFPG|ODFPGA|ODFPGB|RT7|SODF	outer dense fiber of sperm tails 1	protein-coding
MACS_peak_1237	chr6	125475925	125476259	+	99.79	NA	intron (NM_001292026, intron 1 of 4)	intron (NM_001292026, intron 1 of 4)	672	NM_001003395	7164	Hs.591347	NM_003287	ENSG00000111907	TPD52L1	D53|hD53	tumor protein D52-like 1	protein-coding
MACS_peak_937	chr21	11085413	11086177	+	99.77	NA	intron (NM_001187, intron 3 of 4)	(CCA)n|Simple_repeat|Simple_repeat	13130	NM_181704	85317	Hs.545789	NM_181704		BAGE4	CT2.4|MLL3P	B melanoma antigen family, member 4	protein-coding
MACS_peak_755	chr2	10569255	10569594	+	99.54	NA	Intergenic	(TGGA)n|Simple_repeat|Simple_repeat	17551	NR_028374	100302743	Hs.730525	NR_028374	ENSG00000206633	SNORA80B	ACA67B	small nucleolar RNA, H/ACA box 80B	snoRNA
MACS_peak_305	chr12	131889903	131890205	+	99.49	NA	Intergenic	(TCCA)n|Simple_repeat|Simple_repeat	58039	NR_103736	338797	Hs.592007	NM_001025466		LOC338797	-	uncharacterized LOC338797	ncRNA
MACS_peak_758	chr2	11679697	11680043	+	99.25	NA	promoter-TSS (NM_148903)	promoter-TSS (NM_148903)	-210	NM_148903	9687	Hs.467733	NM_014668	ENSG00000196208	GREB1	-	growth regulation by estrogen in breast cancer 1	protein-coding
MACS_peak_1091	chr4	7865652	7865930	+	99.03	NA	intron (NM_001134647, intron 3 of 17)	(CATCC)n|Simple_repeat|Simple_repeat	-74937	NM_203423	389199	Hs.375210	NM_203423	ENSG00000228919	LOC389199	-	uncharacterized LOC389199	protein-coding
MACS_peak_886	chr20	55105094	55105484	+	99.03	NA	Intergenic	Intergenic	-3013	NM_001013646	388799	Hs.287759	NM_001013646	ENSG00000213714	FAM209B	C20orf107|dJ1153D9.4	family with sequence similarity 209, member B	protein-coding
MACS_peak_846	chr20	20336972	20337308	+	99.03	NA	intron (NM_015585, intron 26 of 26)	intron (NM_015585, intron 26 of 26)	-11625	NM_002196	3642	Hs.89584	NM_002196	ENSG00000173404	INSM1	IA-1|IA1	insulinoma-associated 1	protein-coding
MACS_peak_727	chr19	50212272	50212693	+	98.96	NA	intron (NR_108072, intron 15 of 20)	intron (NR_108072, intron 15 of 20)	18117	NM_001199753	126129	Hs.112195	NM_152359	ENSG00000169169	CPT1C	CATL1|CPT1-B|CPT1P|CPTI-B|CPTIC|SPG73	carnitine palmitoyltransferase 1C	protein-coding
MACS_peak_1458	chr9	129258542	129258884	+	98.89	NA	intron (NM_033446, intron 9 of 9)	(CCCA)n|Simple_repeat|Simple_repeat	-85930	NR_045006	641373	Hs.742606	NR_045006		NRON	NCRNA00194	non-protein coding RNA, repressor of NFAT	ncRNA
MACS_peak_1400	chr8	143826064	143826408	+	98.46	NA	Intergenic	Intergenic	-2407	NM_020427	57152	Hs.103505	NM_020427	ENSG00000126233	SLURP1	ANUP|ARS|ArsB|LY6LS|MDM	secreted LY6/PLAUR domain containing 1	protein-coding
MACS_peak_1232	chr6	109200378	109200723	+	98.25	NA	intron (NM_032131, intron 5 of 17)	intron (NM_032131, intron 5 of 17)	30931	NM_032131	84071	Hs.645481	NM_032131	ENSG00000118690	ARMC2	bA787I22.1	armadillo repeat containing 2	protein-coding
MACS_peak_786	chr2	105440811	105441076	+	98.18	NA	intron (NR_037883, intron 1 of 3)	(TGG)n|Simple_repeat|Simple_repeat	26991	NR_037883	100506421	Hs.437281	NR_037883		LINC01158	PANTR1|linc-Brn1a|linc-POU3F3	long intergenic non-protein coding RNA 1158	ncRNA
MACS_peak_1109	chr4	187354534	187354885	+	98.18	NA	intron (NR_033900, intron 1 of 3)	intron (NR_033900, intron 1 of 3)	67503	NR_033900	285441	Hs.481369	NR_033900	ENSG00000251165	F11-AS1	-	F11 antisense RNA 1	ncRNA
MACS_peak_318	chr12	132875740	132876216	+	98.18	NA	intron (NM_001122636, intron 1 of 10)	intron (NM_001122636, intron 1 of 10)	24001	NR_024563	100130238	Hs.536338	NR_024563		LOC100130238	-	uncharacterized LOC100130238	ncRNA
MACS_peak_650	chr17	72765913	72766221	+	98.09	NA	TTS (NM_004252)	TTS (NM_004252)	6497	NM_001305086	26151	Hs.144058	NM_015654	ENSG00000109065	NAT9	EBSP, hNATL	N-acetyltransferase 9 (GCN5-related, putative)	protein-coding
MACS_peak_1120	chr5	1166047	1166433	+	97.88	NA	Intergenic	(TCCA)n|Simple_repeat|Simple_repeat	12480	NR_109911	101928857	Hs.593732	NR_109911	ENSG00000249201	CTD-3080P12.3	-	uncharacterized LOC101928857	ncRNA
MACS_peak_1159	chr5	128513407	128513674	+	97.83	NA	Intergenic	L1MEf|LINE|L1	80159	NR_039776	100616175		NR_039776	ENSG00000264563	MIR4633	-	microRNA 4633	ncRNA
MACS_peak_1029	chr3	126864970	126865243	+	97.81	NA	Intergenic	L2a|LINE|L2	-46868	NM_001007534	285311	Hs.591284	NM_001007534		C3orf56	-	chromosome 3 open reading frame 56	protein-coding
MACS_peak_1073	chr4	662999	663348	+	97.40	NA	intron (NM_001145291, intron 21 of 21)	C-rich|Low_complexity|Low_complexity	4954	NR_033743	521	Hs.85539	NM_007100	ENSG00000169020	ATP5I	ATP5K	ATP synthase, H+ transporting, mitochondrial Fo complex subunit E	protein-coding
MACS_peak_944	chr21	39618886	39619183	+	97.20	NA	intron (NM_001276438, intron 1 of 2)	(TGGA)n|Simple_repeat|Simple_repeat	-9586	NM_001276436	3772	Hs.411299	NM_002243	ENSG00000157551	KCNJ15	IRKK|KIR1.3|KIR4.2	potassium channel, inwardly rectifying subfamily J, member 15	protein-coding
MACS_peak_1249	chr6	169060158	169060470	+	97.15	NA	intron (NM_001166412, intron 11 of 12)	G-rich|Low_complexity|Low_complexity	218483	NM_001166412	64094	Hs.487200	NM_022138	ENSG00000112562	SMOC2	DTDP1|MST117|MSTP117|MSTP140|SMAP2|bA270C4A.1|bA37D8.1|dJ421D16.1	SPARC related modular calcium binding 2	protein-coding
MACS_peak_13	chr1	7043556	7043988	+	96.90	NA	intron (NM_015215, intron 3 of 22)	(TGGA)n|Simple_repeat|Simple_repeat	198388	NR_038934	23261	Hs.397705	NM_015215	ENSG00000171735	CAMTA1	CANPMR	calmodulin binding transcription activator 1	protein-coding
MACS_peak_1175	chr5	171516237	171516514	+	96.83	NA	intron (NM_005990, intron 10 of 18)	L2a|LINE|L2	-82498	NM_033645	23291	Hs.484138	NM_012300	ENSG00000072803	FBXW11	BTRC2|BTRCP2|FBW1B|FBXW1B|Fbw11|Hos	F-box and WD repeat domain containing 11	protein-coding
MACS_peak_783	chr2	99831822	99832170	+	96.76	NA	Intergenic	Intergenic	34454	NR_028356	51263	Hs.346736	NM_016503	ENSG00000241962	MRPL30	L28MT|L30MT|MRP-L28|MRP-L30|MRPL28|MRPL28M|RPML28	mitochondrial ribosomal protein L30	protein-coding
MACS_peak_534	chr16	79515442	79515749	+	96.13	NA	Intergenic	(TCCA)n|Simple_repeat|Simple_repeat	119027	NM_005360	4094	Hs.134859	NM_005360	ENSG00000178573	MAF	AYGRP|CCA4|CTRCT21|c-MAF	v-maf avian musculoaponeurotic fibrosarcoma oncogene homolog	protein-coding
MACS_peak_936	chr21	10086055	10088044	+	95.91	NA	Intergenic	(GAATG)n|Satellite|Satellite	-118455	NR_038328	100132288	Hs.487562	NM_174948	ENSG00000188681	TEKT4P2	MAFIPL|TEKT4P	tektin 4 pseudogene 2	pseudo
MACS_peak_49	chr1	112056078	112056477	+	95.52	NA	intron (NM_001081976, intron 1 of 5)	intron (NM_001081976, intron 1 of 5)	-9534	NM_001302678	140	Hs.281342	NM_000677	ENSG00000121933	ADORA3	A3AR	adenosine A3 receptor	protein-coding
MACS_peak_529	chr16	70906528	70906812	+	95.51	NA	intron (NM_001270974, intron 64 of 85)	(TCCA)n|Simple_repeat|Simple_repeat	-71609	NM_018052	55697	Hs.445061	NM_018052	ENSG00000103043	VAC14	ArPIKfyve|TAX1BP2|TRX	Vac14 homolog (S. cerevisiae)	protein-coding
MACS_peak_1033	chr3	128723254	128723560	+	95.44	NA	intron (NM_024768, intron 2 of 7)	intron (NM_024768, intron 2 of 7)	2935	NM_024768	79825	Hs.134807	NM_024768	ENSG00000114654	EFCC1	C3orf73|CCDC48	EF-hand and coiled-coil domain containing 1	protein-coding
MACS_peak_545	chr16	84158770	84159256	+	95.42	NA	intron (NM_031463, intron 5 of 5)	(CAAT)n|Simple_repeat|Simple_repeat	-8465	NM_003791	8720	Hs.75890	NM_003791	ENSG00000140943	MBTPS1	PCSK8|S1P|SKI-1	membrane bound transcription factor peptidase, site 1	protein-coding
MACS_peak_1488	chr9	137343574	137343867	+	95.42	NA	Intergenic	(TCCA)n|Simple_repeat|Simple_repeat	45292	NM_001291921	6256	Hs.590886	NM_002957		RXRA	NR2B1	retinoid X receptor alpha	protein-coding
MACS_peak_406	chr15	39701255	39701575	+	95.39	NA	Intergenic	(TGGA)n|Simple_repeat|Simple_repeat	158545	NM_207445	400360	Hs.376109	NM_207445		C15orf54	-	chromosome 15 open reading frame 54	protein-coding
MACS_peak_649	chr17	72756847	72757168	+	95.17	NA	intron (NM_004252, intron 1 of 5)	MIRc|SINE|MIR	12255	NR_037409	100500847		NR_037409	ENSG00000264624	MIR3615	mir-3615	microRNA 3615	ncRNA
MACS_peak_1318	chr7	127252398	127252758	+	95.11	NA	intron (NM_006193, intron 6 of 8)	(TGGG)n|Simple_repeat|Simple_repeat	3202	NM_006193	5078	Hs.129706	NM_006193	ENSG00000106331	PAX4	KPD|MODY9	paired box 4	protein-coding
MACS_peak_134	chr10	32486486	32486862	+	95.03	NA	Intergenic	LTR19A|LTR|ERV1	-141303	NM_004521	3799	Hs.327736	NM_004521	ENSG00000170759	KIF5B	HEL-S-61|KINH|KNS|KNS1|UKHC	kinesin family member 5B	protein-coding
MACS_peak_333	chr13	69260167	69260489	+	94.95	NA	Intergenic	MER4A1_|LTR|ERV1	199129	NR_038878	338862		NR_038878	ENSG00000281778	LINC00550	-	long intergenic non-protein coding RNA 550	ncRNA
MACS_peak_624	chr17	38604894	38605256	+	94.94	NA	intron (NM_001552, intron 1 of 3)	intron (NM_001552, intron 1 of 3)	5399	NM_001552	3487	Hs.462998	NM_001552	ENSG00000141753	IGFBP4	BP-4|HT29-IGFBP|IBP4|IGFBP-4	insulin like growth factor binding protein 4	protein-coding
MACS_peak_1060	chr3	195503890	195504252	+	94.71	NA	intron (NM_138297, intron 1 of 22)	(CATAC)n|Simple_repeat|Simple_repeat	34773	NM_004532	4585	Hs.369646	NM_004532	ENSG00000145113	MUC4	ASGP|HSA276359|MUC-4	mucin 4, cell surface associated	protein-coding
MACS_peak_1383	chr8	140884379	140884703	+	94.52	NA	intron (NM_031466, intron 21 of 22)	(TGGA)n|Simple_repeat|Simple_repeat	-169242	NM_001282534	51305	Hs.493037	NM_001282534	ENSG00000169427	KCNK9	K2p9.1|KT3.2|TASK-3|TASK3	potassium channel, two pore domain subfamily K, member 9	protein-coding
MACS_peak_1128	chr5	2585339	2585702	+	94.50	NA	Intergenic	(TGGA)n|Simple_repeat|Simple_repeat	166249	NM_001134222	153572	Hs.282089	NM_033267	ENSG00000170561	IRX2	IRXA2	iroquois homeobox 2	protein-coding
MACS_peak_665	chr17	80105384	80105788	+	94.40	NA	intron (NM_198082, intron 14 of 16)	(TGGA)n|Simple_repeat|Simple_repeat	-49480	NM_004104	2194	Hs.83190	NM_004104	ENSG00000169710	FASN	FAS|OA-519|SDR27X1	fatty acid synthase	protein-coding
MACS_peak_1000	chr3	15168592	15168831	+	94.40	NA	Intergenic	(TCCA)n|Simple_repeat|Simple_repeat	-28047	NR_126155	64145	Hs.475565	NM_022340	ENSG00000131381	RBSN	Rabenosyn-5|ZFYVE20	rabenosyn, RAB effector	protein-coding
MACS_peak_614	chr17	21139202	21139490	+	94.20	NA	Intergenic	(TCCA)n|Simple_repeat|Simple_repeat	17232	NM_152914	256302	Hs.654713	NM_152914	ENSG00000274180	NATD1	C17orf103|Gtlf3b	N-acetyltransferase domain containing 1	protein-coding
MACS_peak_835	chr2	241890251	241890577	+	94.08	NA	Intergenic	(TCCA)n|Simple_repeat|Simple_repeat	16454	NR_033841	200772	Hs.647893	NR_033841	ENSG00000233392	LOC200772	-	uncharacterized LOC200772	ncRNA
MACS_peak_185	chr11	68031795	68032135	+	93.96	NA	intron (NM_022338, intron 2 of 3)	(TCCA)n|Simple_repeat|Simple_repeat	7504	NM_001300913	53838	Hs.303025	NM_022338	ENSG00000171067	C11orf24	DM4E3	chromosome 11 open reading frame 24	protein-coding
MACS_peak_264	chr12	110099232	110099687	+	93.89	NA	Intergenic	(CCA)n|Simple_repeat|Simple_repeat	-52728	NM_032829	84915	Hs.661785	NM_032829	ENSG00000139438	FAM222A	C12orf34	family with sequence similarity 222, member A	protein-coding
MACS_peak_1393	chr8	143075769	143076059	+	93.73	NA	Intergenic	Intergenic	3743	NR_130468	100616374		NR_130468	ENSG00000265612	MIR4539	-	microRNA 4539	ncRNA
MACS_peak_694	chr19	18194810	18195177	+	93.70	NA	intron (NM_001290024, intron 2 of 17)	(TCCA)n|Simple_repeat|Simple_repeat	2820	NM_153701	3594	Hs.567294	NM_005535	ENSG00000096996	IL12RB1	CD212|IL-12R-BETA1|IL12RB|IMD30	interleukin 12 receptor, beta 1	protein-coding
MACS_peak_1492	chr9	137618052	137618343	+	93.50	NA	intron (NM_000093, intron 4 of 65)	(TGGA)n|Simple_repeat|Simple_repeat	84546	NM_000093	1289	Hs.210283	NM_000093	ENSG00000130635	COL5A1	EDSC	collagen, type V, alpha 1	protein-coding
MACS_peak_456	chr16	594704	594925	+	93.43	NA	intron (NM_005632, intron 3 of 13)	(CCTCG)n|Simple_repeat|Simple_repeat	1537	NR_036137	100423037		NR_036137	ENSG00000266235	MIR3176	mir-3176	microRNA 3176	ncRNA
MACS_peak_1210	chr6	1544307	1544528	+	93.40	NA	Intergenic	(TGGA)n|Simple_repeat|Simple_repeat	-61349	NR_125804	101927703	Hs.607964	NR_125804		FOXCUT	LINC01379|TCONS_00011636	FOXC1 upstream transcript (non-protein coding)	ncRNA
MACS_peak_225	chr11	102601696	102601993	+	92.70	NA	Intergenic	(CCCA)n|Simple_repeat|Simple_repeat	-6159	NM_001304441	4317	Hs.161839	NM_002424	ENSG00000118113	MMP8	CLG1|HNC|MMP-8|PMNL-CL	matrix metallopeptidase 8	protein-coding
MACS_peak_1186	chr5	174238595	174238893	+	92.70	NA	Intergenic	Intergenic	60007	NR_039777	100616202		NR_039777	ENSG00000266890	MIR4634	-	microRNA 4634	ncRNA
MACS_peak_66	chr1	151849267	151849710	+	92.66	NA	exon (NM_053055, exon 5 of 6)	exon (NM_053055, exon 5 of 6)	-23315	NM_182578	284486	Hs.132648	NM_182578	ENSG00000196407	THEM5	ACOT15	thioesterase superfamily member 5	protein-coding
MACS_peak_306	chr12	131961999	131962405	+	92.66	NA	Intergenic	(ATGGTG)n|Simple_repeat|Simple_repeat	130187	NR_103736	338797	Hs.592007	NM_001025466		LOC338797	-	uncharacterized LOC338797	ncRNA
MACS_peak_697	chr19	18764657	18764990	+	92.59	NA	intron (NM_018316, intron 1 of 2)	(CCCA)n|Simple_repeat|Simple_repeat	16985	NM_018316	55295	Hs.250632	NM_018316		KLHL26	-	kelch-like family member 26	protein-coding
MACS_peak_641	chr17	63173278	63173770	+	92.52	NA	intron (NM_003835, intron 8 of 18)	(TCCA)n|Simple_repeat|Simple_repeat	40068	NM_001081955	8787	Hs.664380	NM_003835	ENSG00000108370	RGS9	PERRS|RGS9L	regulator of G-protein signaling 9	protein-coding
MACS_peak_938	chr21	15253400	15253668	+	91.98	NA	Intergenic	MSTA|LTR|ERVL-MaLR	-32849	NR_026755	54055	Hs.580910	NR_026755	ENSG00000228314	CYP4F29P	4F-se4[6:7:8]|C21orf15|CYP4F-se4[6:7:8]|CYP4F3LP	cytochrome P450, family 4, subfamily F, polypeptide 29, pseudogene	pseudo
MACS_peak_472	chr16	4410028	4410326	+	91.90	NA	intron (NM_001201479, intron 21 of 30)	intron (NM_001201479, intron 21 of 30)	-8804	NM_016069	51025	Hs.730693	NM_016069	ENSG00000217930	PAM16	CGI-136|MAGMAS|SMDMDM|TIM16|TIMM16	presequence translocase-associated motor 16 homolog (S. cerevisiae)	protein-coding
MACS_peak_1076	chr4	1391380	1391763	+	91.86	NA	Intergenic	Intergenic	6231	NM_175918	285464	Hs.26410	NM_175918	ENSG00000179979	CRIPAK	-	cysteine-rich PAK1 inhibitor	protein-coding
MACS_peak_887	chr20	55414100	55414634	+	91.81	NA	Intergenic	(TGGA)n|Simple_repeat|Simple_repeat	210009	NM_003222	7022	Hs.473152	NM_003222	ENSG00000087510	TFAP2C	AP2-GAMMA|ERF1|TFAP2G|hAP-2g	transcription factor AP-2 gamma (activating enhancer binding protein 2 gamma)	protein-coding
MACS_peak_661	chr17	79310175	79310370	+	91.52	NA	Intergenic	Intergenic	-5798	NM_178520	284186	Hs.364191	NM_178520	ENSG00000185332	TMEM105	-	transmembrane protein 105	protein-coding
MACS_peak_569	chr16	88226537	88226784	+	91.14	NA	Intergenic	(TGG)n|Simple_repeat|Simple_repeat	-1227	NR_110944	101928880	Hs.634835	NR_110944	ENSG00000260420	LOC101928880	LA16c-444G7.2	uncharacterized LOC101928880	ncRNA
MACS_peak_137	chr10	35956039	35956454	+	91.14	NA	Intergenic	(CCA)n|Simple_repeat|Simple_repeat	-25884	NM_031866	8325	Hs.302634	NM_031866		FZD8	FZ-8|hFZ8	frizzled class receptor 8	protein-coding
MACS_peak_143	chr10	105010620	105010930	+	91.14	NA	Intergenic	(CCA)n|Simple_repeat|Simple_repeat	5131	NM_001143909	729020	Hs.458437	NM_001143909	ENSG00000235376	RPEL1	-	ribulose-5-phosphate-3-epimerase-like 1	protein-coding
MACS_peak_1449	chr9	116545714	116545923	+	90.97	NA	Intergenic	Intergenic	-92744	NM_133374	114991	Hs.349208	NM_133374	ENSG00000157657	ZNF618	FP13169|NEDD10	zinc finger protein 618	protein-coding
MACS_peak_228	chr11	120985445	120985868	+	90.92	NA	intron (NM_005422, intron 5 of 22)	(CCCA)n|Simple_repeat|Simple_repeat	12281	NM_005422	7007	Hs.248162	NM_005422	ENSG00000109927	TECTA	DFNA12|DFNA8|DFNB21	tectorin alpha	protein-coding
MACS_peak_314	chr12	132403173	132403485	+	90.84	NA	intron (NM_003565, intron 23 of 27)	(GTGTG)n|Simple_repeat|Simple_repeat	-10416	NM_001002020	80324	Hs.592004	NM_025215	ENSG00000177192	PUS1	MLASA1	pseudouridylate synthase 1	protein-coding
MACS_peak_1072	chr4	662528	662910	+	90.78	NA	intron (NM_001145291, intron 21 of 21)	C-rich|Low_complexity|Low_complexity	5408	NR_033743	521	Hs.85539	NM_007100	ENSG00000169020	ATP5I	ATP5K	ATP synthase, H+ transporting, mitochondrial Fo complex subunit E	protein-coding
MACS_peak_380	chr14	104342127	104342390	+	90.78	NA	Intergenic	(TGGG)n|Simple_repeat|Simple_repeat	28200	NR_038436	145216	Hs.578091	NR_038436	ENSG00000258735	LINC00637	-	long intergenic non-protein coding RNA 637	ncRNA
MACS_peak_880	chr20	50477887	50478388	+	90.76	NA	intron (NR_110016, intron 1 of 2)	(TCCA)n|Simple_repeat|Simple_repeat	1315	NR_110016	101927678	Hs.683840	NR_110016	ENSG00000227964	LINC01429	-	long intergenic non-protein coding RNA 1429	ncRNA
MACS_peak_850	chr20	33272648	33272879	+	90.73	NA	Intergenic	MIR|SINE|MIR	-7674	NM_080476	128869	Hs.253319	NM_080476	ENSG00000101464	PIGU	CDC91L1|GAB1	phosphatidylinositol glycan anchor biosynthesis class U	protein-coding
MACS_peak_367	chr14	97395182	97395524	+	90.73	NA	Intergenic	(TCCA)n|Simple_repeat|Simple_repeat	-14563	NR_104113	145249	Hs.592323	NR_104113	ENSG00000225163	LINC00618	C14orf63	long intergenic non-protein coding RNA 618	ncRNA
MACS_peak_1057	chr3	195502183	195502525	+	90.70	NA	intron (NM_138297, intron 1 of 22)	(CATAC)n|Simple_repeat|Simple_repeat	36490	NM_004532	4585	Hs.369646	NM_004532	ENSG00000145113	MUC4	ASGP|HSA276359|MUC-4	mucin 4, cell surface associated	protein-coding
MACS_peak_404	chr15	38752408	38752606	+	90.64	NA	intron (NM_173611, intron 1 of 7)	intron (NM_173611, intron 1 of 7)	6179	NM_173611	283742	Hs.6799	NM_173611	ENSG00000171262	FAM98B	-	family with sequence similarity 98, member B	protein-coding
MACS_peak_106	chr10	1717047	1717352	+	90.35	NA	intron (NM_018702, intron 1 of 9)	intron (NM_018702, intron 1 of 9)	62471	NM_018702	105	Hs.586663	NM_018702	ENSG00000185736	ADARB2	ADAR3|RED2	adenosine deaminase, RNA-specific, B2 (inactive)	protein-coding
MACS_peak_708	chr19	35615219	35615848	+	90.31	NA	TTS (NM_001136007)	TTS (NM_001136007)	1929	NR_106947	102466205		NR_106947	ENSG00000278663	MIR6887	hsa-mir-6887	microRNA 6887	ncRNA
MACS_peak_1462	chr9	130809529	130809884	+	90.29	NA	Intergenic	LTR61|LTR|ERV1	19893	NM_197956	203245	Hs.373606	NM_197956	ENSG00000171169	NAIF1	C9orf90|bA379C10.2	nuclear apoptosis inducing factor 1	protein-coding
MACS_peak_184	chr11	67253484	67253765	+	90.09	NA	intron (NM_001302959, intron 1 of 5)	LTR1|LTR|ERV1	2637	NM_001302959	9049	Hs.412433	NM_003977	ENSG00000110711	AIP	ARA9|FKBP16|FKBP37|SMTPHN|XAP-2|XAP2	aryl hydrocarbon receptor interacting protein	protein-coding
MACS_peak_638	chr17	62493114	62493714	+	89.77	NA	promoter-TSS (NM_007215)	promoter-TSS (NM_007215)	-230	NM_007215	11232	Hs.437009	NM_007215	ENSG00000256525	POLG2	HP55|MTPOLB|PEOA4|POLB|POLG-BETA|POLGB	polymerase (DNA directed), gamma 2, accessory subunit	protein-coding
MACS_peak_1311	chr7	101690348	101690683	+	89.72	NA	intron (NM_181500, intron 3 of 22)	(TGGA)n|Simple_repeat|Simple_repeat	229633	NM_181552	1523	Hs.191482	NM_001913	ENSG00000257923	CUX1	CASP|CDP|CDP/Cut|CDP1|COY1|CUTL1|CUX|Clox|Cux/CDP|GOLIM6|Nbla10317|p100|p110|p200|p75	cut-like homeobox 1	protein-coding
MACS_peak_1144	chr5	66531625	66531956	+	88.91	NA	Intergenic	Intergenic	-39173	NM_005582	4064	Hs.87205	NM_005582		CD180	LY64|Ly78|RP105	CD180 molecule	protein-coding
MACS_peak_913	chr20	60468653	60468960	+	88.78	NA	intron (NM_001794, intron 7 of 15)	(TGGA)n|Simple_repeat|Simple_repeat	59912	NR_031658	100302168		NR_031658	ENSG00000221417	MIR1257	MIRN1257|hsa-mir-1257	microRNA 1257	ncRNA
MACS_peak_1493	chr9	137618376	137618724	+	88.72	NA	intron (NM_000093, intron 4 of 65)	(TGGA)n|Simple_repeat|Simple_repeat	84899	NM_000093	1289	Hs.210283	NM_000093	ENSG00000130635	COL5A1	EDSC	collagen, type V, alpha 1	protein-coding
MACS_peak_263	chr12	109831322	109831644	+	88.56	NA	intron (NM_001101421, intron 2 of 30)	(TCCA)n|Simple_repeat|Simple_repeat	4959	NM_001101421	283446	Hs.512008	NM_173597	ENSG00000174527	MYO1H	-	myosin IH	protein-coding
MACS_peak_729	chr19	50699723	50699964	+	88.14	NA	Intergenic	(TCCA)n|Simple_repeat|Simple_repeat	-7042	NM_024729	79784	Hs.467142	NM_024729	ENSG00000105357	MYH14	DFNA4|DFNA4A|FP17425|MHC16|MYH17|NMHC II-C|NMHC-II-C|PNMHH|myosin	myosin, heavy chain 14, non-muscle	protein-coding
MACS_peak_1169	chr5	170180926	170181357	+	88.13	NA	Intergenic	(TGGA)n|Simple_repeat|Simple_repeat	-29582	NM_001291985	2568	Hs.26225	NM_014211	ENSG00000094755	GABRP	-	gamma-aminobutyric acid (GABA) A receptor, pi	protein-coding
MACS_peak_198	chr11	69965289	69965686	+	88.00	NA	intron (NR_030691, intron 8 of 24)	(TGGA)n|Simple_repeat|Simple_repeat	33971	NR_030691	55107	Hs.503074	NM_018043	ENSG00000131620	ANO1	DOG1|ORAOV2|TAOS2|TMEM16A	anoctamin 1, calcium activated chloride channel	protein-coding
MACS_peak_574	chr16	88326636	88326957	+	87.76	NA	Intergenic	(TGGA)n|Simple_repeat|Simple_repeat	98909	NR_110944	101928880	Hs.634835	NR_110944	ENSG00000260420	LOC101928880	LA16c-444G7.2	uncharacterized LOC101928880	ncRNA
MACS_peak_1102	chr4	40297188	40297627	+	87.66	NA	Intergenic	(TCTCTG)n|Simple_repeat|Simple_repeat	-11795	NR_121641	101060498	Hs.351492	NR_121640	ENSG00000249241	LOC101060498	-	uncharacterized LOC101060498	ncRNA
MACS_peak_934	chr20	62728212	62728545	+	87.66	NA	intron (NM_182647, intron 3 of 4)	HAL1-2a_MD|LINE|L1	9806	NM_005286	2832	Hs.248118	NM_005286		NPBWR2	GPR8	neuropeptides B/W receptor 2	protein-coding
MACS_peak_558	chr16	86497848	86498201	+	87.66	NA	Intergenic	(ATGGTG)n|Simple_repeat|Simple_repeat	44442	NR_036444	400550	Hs.448825	NR_033925	ENSG00000268388	FENDRR	FOXF1-AS1|TCONS_00024240|lincFOXF1|onco-lncRNA-21	FOXF1 adjacent non-coding developmental regulatory RNA	ncRNA
MACS_peak_111	chr10	3261271	3261570	+	87.61	NA	Intergenic	(TCCA)n|Simple_repeat|Simple_repeat	-46387	NM_001242307	10531	Hs.528300	NM_014889	ENSG00000107959	PITRM1	MP1|PreP	pitrilysin metallopeptidase 1	protein-coding
MACS_peak_1184	chr5	173910407	173910768	+	87.35	NA	intron (NR_125806, intron 2 of 5)	intron (NR_125806, intron 2 of 5)	147230	NR_125806	101928176	Hs.436014	NR_125806	ENSG00000249306	LINC01411	-	long intergenic non-protein coding RNA 1411	ncRNA
MACS_peak_750	chr2	9296784	9297024	+	87.06	NA	Intergenic	(TGGA)n|Simple_repeat|Simple_repeat	-49990	NM_001135191	8853	Hs.555902	NM_003887	ENSG00000151693	ASAP2	AMAP2|CENTB3|DDEF2|PAG3|PAP|Pap-alpha|SHAG1	ArfGAP with SH3 domain, ankyrin repeat and PH domain 2	protein-coding
MACS_peak_93	chr10	110158	110607	+	87.02	NA	Intergenic	(CCCTAA)n|Simple_repeat|Simple_repeat	-15204	NM_177987	347688	Hs.532659	NM_177987	ENSG00000261456	TUBB8	bA631M21.2	tubulin, beta 8 class VIII	protein-coding
MACS_peak_959	chr21	44185031	44185354	+	86.54	NA	intron (NM_001001571, intron 12 of 17)	(TGGA)n|Simple_repeat|Simple_repeat	111330	NM_001001572	5152	Hs.473927	NM_002606	ENSG00000160191	PDE9A	HSPDE9A2	phosphodiesterase 9A	protein-coding
MACS_peak_402	chr15	28738446	28738620	+	86.50	NA	Intergenic	Intergenic	-2542	NR_039732	100616223		NR_039732	ENSG00000276941	MIR4509-1	-	microRNA 4509-1	ncRNA
MACS_peak_123	chr10	8767910	8768227	+	86.43	NA	Intergenic	Intergenic	-171884	NR_131944	105755953	Hs.564146	NR_131944		LOC105755953	-	uncharacterized LOC105755953	ncRNA
MACS_peak_865	chr20	47536642	47539072	+	86.28	NA	promoter-TSS (NM_006420)	promoter-TSS (NM_006420)	-418	NM_006420	10564	Hs.62578	NM_006420	ENSG00000124198	ARFGEF2	BIG2|PVNH2|dJ1164I10.1	ADP-ribosylation factor guanine nucleotide-exchange factor 2 (brefeldin A-inhibited)	protein-coding
MACS_peak_1240	chr6	135532409	135532685	+	86.06	NA	intron (NM_001161658, intron 15 of 15)	intron (NM_001161658, intron 15 of 15)	30094	NM_001130172	4602	Hs.606320	NM_005375	ENSG00000118513	MYB	Cmyb|c-myb|c-myb_CDS|efg	v-myb avian myeloblastosis viral oncogene homolog	protein-coding
MACS_peak_344	chr14	58893949	58894232	+	85.79	NA	promoter-TSS (NM_001244190)	promoter-TSS (NM_001244190)	-13	NM_001244189	9786	Hs.232532	NM_014749	ENSG00000100578	KIAA0586	Talpid3	KIAA0586	protein-coding
MACS_peak_1512	chr9	140615599	140615879	+	85.76	NA	intron (NM_001145527, intron 3 of 15)	C-rich|Low_complexity|Low_complexity	-41735	NR_024341	643210	Hs.721002	NM_001039765	ENSG00000281796	EHMT1-IT1	-	EHMT1 intronic transcript 1	ncRNA
MACS_peak_736	chr19	56054485	56054773	+	85.75	NA	intron (NM_001199824, intron 3 of 3)	(TCCA)n|Simple_repeat|Simple_repeat	2280	NM_001199824	100130827	Hs.712129	NM_001199824	ENSG00000231274	SBK3	SGK110	SH3 domain binding kinase family, member 3	protein-coding
MACS_peak_1395	chr8	143366337	143366746	+	85.55	NA	intron (NM_001291931, intron 8 of 10)	(TGGA)n|Simple_repeat|Simple_repeat	86824	NR_024378	619434	Hs.393308	NR_024378	ENSG00000254008	LINC00051	C8orf43|NCRNA00051	long intergenic non-protein coding RNA 51	ncRNA
MACS_peak_72	chr1	168318183	168318294	+	85.42	NA	Intergenic	L1PA2|LINE|L1	-26524	NR_030284	693142		NR_030284	ENSG00000207974	MIR557	MIRN557|hsa-mir-557	microRNA 557	ncRNA
MACS_peak_224	chr11	85839791	85840061	+	85.37	NA	Intergenic	Intergenic	-59003	NM_001206947	8301	Hs.163893	NM_007166	ENSG00000073921	PICALM	CALM|CLTH|LAP	phosphatidylinositol binding clathrin assembly protein	protein-coding
MACS_peak_347	chr14	70198742	70199015	+	85.32	NA	Intergenic	(TCCA)n|Simple_repeat|Simple_repeat	-34951	NM_001039465	6430	Hs.632326	NM_006925	ENSG00000100650	SRSF5	HRS|SFRS5|SRP40	serine/arginine-rich splicing factor 5	protein-coding
MACS_peak_397	chr15	21235514	21235732	+	85.12	NA	Intergenic	MER50|LTR|ERV1	89856	NR_040094	348120	Hs.116287	NR_040094	ENSG00000258710	LINC01193	CT60	long intergenic non-protein coding RNA 1193	ncRNA
MACS_peak_556	chr16	85862319	85862678	+	84.99	NA	Intergenic	Intergenic	29325	NM_001861	1327	Hs.433419	NM_001861	ENSG00000131143	COX4I1	COX4|COX4-1|COXIV	cytochrome c oxidase subunit IV isoform 1	protein-coding
MACS_peak_277	chr12	117946369	117946661	+	84.88	NA	intron (NM_173598, intron 14 of 19)	(TGGA)n|Simple_repeat|Simple_repeat	-146908	NM_001204218	4842	Hs.654410	NM_000620	ENSG00000089250	NOS1	IHPS1|N-NOS|NC-NOS|NOS|bNOS|nNOS	nitric oxide synthase 1 (neuronal)	protein-coding
MACS_peak_453	chr15	102501652	102502076	+	84.86	NA	intron (NR_003659, intron 1 of 10)	CpG	848	NR_003659	374666	Hs.459573	NM_199163		WASH3P	FAM39DP	WAS protein family homolog 3 pseudogene	pseudo
MACS_peak_1399	chr8	143825597	143825911	+	84.64	NA	Intergenic	(TGGA)n|Simple_repeat|Simple_repeat	-1925	NM_020427	57152	Hs.103505	NM_020427	ENSG00000126233	SLURP1	ANUP|ARS|ArsB|LY6LS|MDM	secreted LY6/PLAUR domain containing 1	protein-coding
MACS_peak_172	chr11	30543278	30543541	+	84.64	NA	intron (NM_001145399, intron 3 of 6)	MIRb|SINE|MIR	58631	NM_001584	744	Hs.289795	NM_001584	ENSG00000066382	MPPED2	239FB|C11orf8	metallophosphoesterase domain containing 2	protein-coding
MACS_peak_1234	chr6	120462837	120463088	+	84.64	NA	Intergenic	LTR22C|LTR|ERVK	126637	NR_036098	100422951		NR_036098	ENSG00000265725	MIR3144	mir-3144	microRNA 3144	ncRNA
MACS_peak_1100	chr4	26211174	26211441	+	84.64	NA	Intergenic	(TCCC)n|Simple_repeat|Simple_repeat	-110025	NM_203283	3516	Hs.479396	NM_005349	ENSG00000168214	RBPJ	AOS3|CBF1|IGKJRB|IGKJRB1|KBF2|RBP-J|RBPJK|RBPSUH|SUH|csl	recombination signal binding protein for immunoglobulin kappa J region	protein-coding
MACS_peak_848	chr20	31208910	31209119	+	84.64	NA	Intergenic	(GGGTG)n|Simple_repeat|Simple_repeat	30769	NM_182584	284805	Hs.353262	NM_182584		C20orf203	-	chromosome 20 open reading frame 203	protein-coding
MACS_peak_1051	chr3	184472366	184472699	+	84.53	NA	Intergenic	GA-rich|Low_complexity|Low_complexity	18411	NR_110043	101928992	Hs.507129	NR_110043	ENSG00000229433	LOC101928992	-	uncharacterized LOC101928992	ncRNA
MACS_peak_687	chr19	13706220	13706514	+	84.45	NA	Intergenic	(TGGA)n|Simple_repeat|Simple_repeat	-89093	NM_023035	773	Hs.501632	NM_000068	ENSG00000141837	CACNA1A	APCA|BI|CACNL1A4|CAV2.1|EA2|FHM|HPCA|MHP|MHP1|SCA6	calcium channel, voltage-dependent, P/Q type, alpha 1A subunit	protein-coding
MACS_peak_215	chr11	75979585	75979912	+	84.44	NA	Intergenic	(TCCA)n|Simple_repeat|Simple_repeat	-62174	NM_004626	7481	Hs.108219	NM_004626	ENSG00000085741	WNT11	HWNT11	wingless-type MMTV integration site family, member 11	protein-coding
MACS_peak_632	chr17	54847955	54848289	+	84.36	NA	Intergenic	(TCCA)n|Simple_repeat|Simple_repeat	63134	NM_001085430	339210	Hs.658949	NM_001085430	ENSG00000214226	C17orf67	-	chromosome 17 open reading frame 67	protein-coding
MACS_peak_677	chr18	77393761	77394018	+	84.30	NA	Intergenic	(TGG)n|Simple_repeat|Simple_repeat	-45912	NM_004715	9150	Hs.465490	NM_004715	ENSG00000060069	CTDP1	CCFDN|FCP1	CTD phosphatase subunit 1	protein-coding
MACS_peak_1130	chr5	3446152	3446372	+	84.26	NA	intron (NR_033898, intron 2 of 4)	(TGG)n|Simple_repeat|Simple_repeat	57856	NR_104618	102467075	Hs.652949	NR_104618	ENSG00000250716	LINC01017	-	long intergenic non-protein coding RNA 1017	ncRNA
MACS_peak_285	chr12	121952747	121952965	+	84.26	NA	intron (NM_032590, intron 9 of 22)	C-rich|Low_complexity|Low_complexity	65508	NM_001005366	84678	Hs.524800	NM_032590	ENSG00000089094	KDM2B	CXXC2|FBXL10|Fbl10|JHDM1B|PCCX2	lysine (K)-specific demethylase 2B	protein-coding
MACS_peak_484	chr16	9364845	9365188	+	84.03	NA	Intergenic	(TCCA)n|Simple_repeat|Simple_repeat	36242	NR_036166	100422920		NR_036166	ENSG00000265841	MIR548X	-	microRNA 548x	ncRNA
MACS_peak_636	chr17	60870549	60871877	+	83.97	NA	intron (NM_001100875, intron 2 of 10)	(CCA)n|Simple_repeat|Simple_repeat	12801	NM_001100875	162333	Hs.665663	NM_152598	ENSG00000173838	MARCH10	MARCH-X|RNF190	membrane associated ring finger 10	protein-coding
MACS_peak_1118	chr5	1044826	1045141	+	83.88	NA	Intergenic	(TGAG)n|Simple_repeat|Simple_repeat	18106	NR_039778	100616479		NR_039778	ENSG00000263834	MIR4635	-	microRNA 4635	ncRNA
MACS_peak_1457	chr9	127416765	127417092	+	83.74	NA	intron (NM_033334, intron 2 of 9)	L2a|LINE|L2	-3787	NR_038975	100379345	Hs.660412	NR_038975	ENSG00000224020	MIR181A2HG	-	MIR181A2 host gene	ncRNA
MACS_peak_505	chr16	23390309	23390699	+	83.68	NA	intron (NM_000336, intron 11 of 12)	(TCCA)n|Simple_repeat|Simple_repeat	74008	NM_153603	91949	Hs.185807	NM_153603	ENSG00000168434	COG7	CDG2E	component of oligomeric golgi complex 7	protein-coding
MACS_peak_1110	chr4	187355171	187355432	+	83.37	NA	intron (NR_033900, intron 1 of 3)	intron (NR_033900, intron 1 of 3)	66911	NR_033900	285441	Hs.481369	NR_033900	ENSG00000251165	F11-AS1	-	F11 antisense RNA 1	ncRNA
MACS_peak_1088	chr4	7616242	7616542	+	83.18	NA	intron (NM_020777, intron 3 of 26)	(TCCA)n|Simple_repeat|Simple_repeat	-139425	NR_026892	84740	Hs.663029	NM_032654	ENSG00000272620	AFAP1-AS1	AFAP1-AS|AFAP1AS	AFAP1 antisense RNA 1	ncRNA
MACS_peak_1267	chr7	1454860	1455242	+	83.17	NA	Intergenic	(TGGA)n|Simple_repeat|Simple_repeat	44058	NM_182924	79778	Hs.376617	NM_024723	ENSG00000164877	MICALL2	JRAB|MICAL-L2	MICAL-like 2	protein-coding
MACS_peak_560	chr16	87006111	87006361	+	83.11	NA	Intergenic	Intergenic	-85154	NR_126008	440390	Hs.513789	NR_126008	ENSG00000232190	LOC440390	-	uncharacterized LOC440390	ncRNA
MACS_peak_1387	chr8	141130688	141130982	+	83.07	NA	intron (NM_031466, intron 17 of 22)	(TCCA)n|Simple_repeat|Simple_repeat	337026	NM_001160372	83696	Hs.654911	NM_031466	ENSG00000167632	TRAPPC9	IBP|IKBKBBP|MRT13|NIBP|T1|TRS120	trafficking protein particle complex 9	protein-coding
MACS_peak_822	chr2	216081595	216081896	+	82.97	NA	Intergenic	Intergenic	-78594	NR_103740	26154	Hs.134585	NM_015657	ENSG00000144452	ABCA12	ARCI4A|ARCI4B|ICR2B|LI2	ATP binding cassette subfamily A member 12	protein-coding
MACS_peak_1501	chr9	138455035	138455336	+	82.95	NA	intron (NM_001018049, intron 3 of 6)	(TAGG)n|Simple_repeat|Simple_repeat	1583	NM_001018049	5047	Hs.532325	NM_002571	ENSG00000122133	PAEP	GD|GdA|GdF|GdS|PAEG|PEP|PP14	progestagen-associated endometrial protein	protein-coding
MACS_peak_1328	chr7	155120180	155120752	+	82.86	NA	Intergenic	Intergenic	30980	NM_005542	3638	Hs.520819	NM_005542	ENSG00000186480	INSIG1	CL-6|CL6	insulin induced gene 1	protein-coding
MACS_peak_5	chr1	1317632	1318192	+	82.86	NA	Intergenic	Intergenic	-7094	NM_017900	54998	Hs.632515	NM_017900	ENSG00000175756	AURKAIP1	AIP|AKIP|MRP-S38	aurora kinase A interacting protein 1	protein-coding
MACS_peak_163	chr11	191701	192033	+	82.59	NA	Intergenic	(CCCTAA)n|Simple_repeat|Simple_repeat	-1213	NM_001097610	653486	Hs.127059	NM_001097610		SCGB1C2	-	secretoglobin, family 1C, member 2	protein-coding
MACS_peak_674	chr18	13243546	13243774	+	82.58	NA	intron (NM_181482, intron 1 of 5)	(TCCA)n|Simple_repeat|Simple_repeat	24931	NM_181482	753	Hs.731853	NM_004338	ENSG00000168675	LDLRAD4	C18orf1	low density lipoprotein receptor class A domain containing 4	protein-coding
MACS_peak_24	chr1	17222408	17222784	+	82.19	NA	Intergenic	U1|snRNA|snRNA	-25849	NM_014675	9696	Hs.309403	NM_014675	ENSG00000058453	CROCC	ROLT	ciliary rootlet coiled-coil, rootletin	protein-coding
MACS_peak_1111	chr4	187356300	187356530	+	82.08	NA	intron (NR_033900, intron 1 of 3)	intron (NR_033900, intron 1 of 3)	65797	NR_033900	285441	Hs.481369	NR_033900	ENSG00000251165	F11-AS1	-	F11 antisense RNA 1	ncRNA
MACS_peak_1044	chr3	161057406	161057809	+	81.70	NA	Intergenic	MIR3|SINE|MIR	32264	NM_001040100	165679	Hs.369104	NM_145035		SPTSSB	ADMP|C3orf57|SSSPTB	serine palmitoyltransferase, small subunit B	protein-coding
MACS_peak_298	chr12	131130844	131131015	+	81.67	NA	Intergenic	C-rich|Low_complexity|Low_complexity	-128519	NM_015347	23504	Hs.657441	NM_015347	ENSG00000060709	RIMBP2	PPP1R133|RBP2|RIM-BP2	RIMS binding protein 2	protein-coding
MACS_peak_1011	chr3	63224855	63225786	+	81.63	NA	Intergenic	Intergenic	-38594	NM_001130003	132204	Hs.648668	NM_144642	ENSG00000163630	SYNPR	SPO	synaptoporin	protein-coding
MACS_peak_40	chr1	43458186	43458383	+	81.63	NA	Intergenic	L1MCa|LINE|L1	-33437	NM_006516	6513	Hs.473721	NM_006516	ENSG00000117394	SLC2A1	CSE|DYT17|DYT18|DYT9|EIG12|GLUT|GLUT-1|GLUT1|GLUT1DS|HTLVR|PED	solute carrier family 2 (facilitated glucose transporter), member 1	protein-coding
MACS_peak_1191	chr5	175802175	175802407	+	81.59	NA	Intergenic	(TCCA)n|Simple_repeat|Simple_repeat	7342	NR_031569	100302203		NR_031569	ENSG00000221464	MIR1271	MIRN1271|hsa-mir-1271	microRNA 1271	ncRNA
MACS_peak_1357	chr8	95653184	95653582	+	81.58	NA	promoter-TSS (NM_001122825)	promoter-TSS (NM_001122825)	19	NM_001122826	54845	Hs.487471	NM_017697	ENSG00000104413	ESRP1	RBM35A|RMB35A	epithelial splicing regulatory protein 1	protein-coding
MACS_peak_1171	chr5	170230654	170230819	+	81.43	NA	intron (NM_014211, intron 6 of 9)	L1MB8|LINE|L1	20013	NM_014211	2568	Hs.26225	NM_014211	ENSG00000094755	GABRP	-	gamma-aminobutyric acid (GABA) A receptor, pi	protein-coding
MACS_peak_712	chr19	39205150	39205383	+	81.35	NA	intron (NM_004924, intron 9 of 20)	intron (NM_004924, intron 9 of 20)	29848	NM_144691	147968	Hs.731775	NM_144691	ENSG00000182472	CAPN12	-	calpain 12	protein-coding
MACS_peak_1456	chr9	127209545	127209766	+	81.25	NA	Intergenic	L2b|LINE|L2	-31903	NM_002799	5695	Hs.213470	NM_002799	ENSG00000136930	PSMB7	Z	proteasome subunit beta 7	protein-coding
MACS_peak_1245	chr6	151979200	151979613	+	81.25	NA	Intergenic	Intergenic	-32225	NM_001122742	2099	Hs.208124	NM_000125	ENSG00000091831	ESR1	ER|ESR|ESRA|ESTRR|Era|NR3A1	estrogen receptor 1	protein-coding
MACS_peak_34	chr1	30196273	30196602	+	81.22	NA	Intergenic	(CCA)n|Simple_repeat|Simple_repeat	314022	NR_110790	101929406	Hs.639413	NR_110790	ENSG00000233399	LOC101929406	-	uncharacterized LOC101929406	ncRNA
MACS_peak_1008	chr3	50642543	50642814	+	81.13	NA	Intergenic	Intergenic	6584	NM_013324	1154	Hs.655334	NM_013324	ENSG00000114737	CISH	BACTS2|CIS|CIS-1|G18|SOCS	cytokine inducible SH2-containing protein	protein-coding
MACS_peak_489	chr16	12070967	12071373	+	81.06	NA	intron (NM_032167, intron 1 of 20)	intron (NM_032167, intron 1 of 20)	579	NM_032167	92017	Hs.458401	NM_032167	ENSG00000048471	SNX29	A-388D4.1|RUNDC2A	sorting nexin 29	protein-coding
MACS_peak_557	chr16	86210163	86210519	+	80.92	NA	Intergenic	(TCCA)n|Simple_repeat|Simple_repeat	-19446	NR_103859	100506542	Hs.111902	NR_103859	ENSG00000269186	LINC01082	TCONS_00024492	long intergenic non-protein coding RNA 1082	ncRNA
MACS_peak_812	chr2	164483161	164483438	+	80.91	NA	intron (NM_018086, intron 2 of 2)	MER41B|LTR|ERV1	109214	NM_018086	55137	Hs.593650	NM_018086		FIGN	-	fidgetin	protein-coding
MACS_peak_1302	chr7	97871686	97871909	+	80.74	NA	intron (NM_015395, intron 6 of 25)	(CCCA)n|Simple_repeat|Simple_repeat	9766	NM_015395	25851	Hs.592281	NM_015395	ENSG00000205356	TECPR1	-	tectonin beta-propeller repeat containing 1	protein-coding
MACS_peak_728	chr19	50435178	50435451	+	80.70	NA	intron (NM_001290746, intron 2 of 2)	intron (NM_001290746, intron 2 of 2)	-1007	NR_039906	100616483		NR_039906	ENSG00000265438	MIR4751	-	microRNA 4751	ncRNA
MACS_peak_1340	chr8	155328	155601	+	80.70	NA	Intergenic	(CCCTAA)n|Simple_repeat|Simple_repeat	-26673	NM_001287255	169270	Hs.591388	NM_173539	ENSG00000172748	ZNF596	-	zinc finger protein 596	protein-coding
MACS_peak_413	chr15	68989399	68989518	+	80.61	NA	intron (NM_001190456, intron 3 of 11)	(TGGA)n|Simple_repeat|Simple_repeat	65131	NM_001190457	10391	Hs.551213	NM_006091	ENSG00000103647	CORO2B	CLIPINC	coronin, actin binding protein, 2B	protein-coding
MACS_peak_351	chr14	75726817	75727129	+	80.59	NA	Intergenic	Intergenic	-18508	NM_005252	2353	Hs.25647	NM_005252	ENSG00000170345	FOS	AP-1|C-FOS|p55	FBJ murine osteosarcoma viral oncogene homolog	protein-coding
MACS_peak_726	chr19	50127107	50127344	+	80.39	NA	intron (NM_020719, intron 11 of 13)	G-rich|Low_complexity|Low_complexity	16175	NM_006270	6237	Hs.515536	NM_006270	ENSG00000126458	RRAS	-	related RAS viral (r-ras) oncogene homolog	protein-coding
MACS_peak_1174	chr5	171122802	171123077	+	80.26	NA	Intergenic	(TGGA)n|Simple_repeat|Simple_repeat	-89937	NM_001289970	644994	Hs.591740	NM_001289970		SMIM23	C5orf50	small integral membrane protein 23	protein-coding
MACS_peak_238	chr12	12742908	12743183	+	80.24	NA	Intergenic	(TTGG)n|Simple_repeat|Simple_repeat	-21722	NM_001310	1389	Hs.591156	NM_001310	ENSG00000111269	CREBL2	-	cAMP responsive element binding protein-like 2	protein-coding
MACS_peak_116	chr10	5958558	5958725	+	80.24	NA	intron (NM_178150, intron 10 of 20)	intron (NM_178150, intron 10 of 20)	22292	NM_032807	84893	Hs.498543	NM_032807	ENSG00000134452	FBXO18	FBH1|Fbx18|hFBH1	F-box protein, helicase, 18	protein-coding
MACS_peak_150	chr10	127940326	127940564	+	80.15	NA	intron (NM_001288973, intron 3 of 22)	(TGGA)n|Simple_repeat|Simple_repeat	136682	NM_001288975	8038	Hs.594351	NM_003474	ENSG00000148848	ADAM12	ADAM12-OT1|CAR10|MCMP|MCMPMltna|MLTN|MLTNA	ADAM metallopeptidase domain 12	protein-coding
MACS_peak_1345	chr8	36919769	36920102	+	80.09	NA	Intergenic	MIRc|SINE|MIR	-59536	NR_031672	100302233		NR_031672	ENSG00000221641	MIR1268A	MIR1268|MIRN1268|hsa-mir-1268|hsa-mir-1268a	microRNA 1268a	ncRNA
MACS_peak_1481	chr9	136716796	136717128	+	80.09	NA	intron (NM_003371, intron 3 of 26)	(TGGA)n|Simple_repeat|Simple_repeat	-111885	NM_007101	1757	Hs.198003	NM_007101	ENSG00000123453	SARDH	BPR-2|DMGDHL1|SAR|SARD|SDH	sarcosine dehydrogenase	protein-coding
MACS_peak_1436	chr9	101339077	101339424	+	80.09	NA	intron (NM_005458, intron 2 of 18)	(TGGA)n|Simple_repeat|Simple_repeat	132229	NM_005458	9568	Hs.198612	NM_005458	ENSG00000136928	GABBR2	GABABR2|GPR51|GPRC3B|HG20|HRIHFB2099	gamma-aminobutyric acid (GABA) B receptor, 2	protein-coding
MACS_peak_1104	chr4	49305544	49306077	+	79.97	NA	Intergenic	ACRO1|Satellite|acro	317151	NM_001286791	80157	Hs.479703	NM_025087	ENSG00000109182	CWH43	CWH43-C	cell wall biogenesis 43 C-terminal homolog	protein-coding
MACS_peak_817	chr2	175525765	175526098	+	79.95	NA	intron (NM_001077269, intron 1 of 7)	intron (NM_001077269, intron 1 of 7)	21696	NM_001077269	7456	Hs.128067	NM_003387	ENSG00000115935	WIPF1	PRPL-2|WAS2|WASPIP|WIP	WAS/WASL interacting protein family, member 1	protein-coding
MACS_peak_537	chr16	81299155	81299487	+	79.88	NA	intron (NM_017429, intron 5 of 10)	(TCCA)n|Simple_repeat|Simple_repeat	27025	NM_017429	53630	Hs.212172	NM_017429	ENSG00000135697	BCO1	BCDO|BCDO1|BCMO|BCMO1|BCO	beta-carotene oxygenase 1	protein-coding
MACS_peak_508	chr16	25225785	25226091	+	79.87	NA	Intergenic	Intergenic	-2347	NM_001169	343	Hs.176658	NM_001169	ENSG00000103375	AQP8	AQP-8	aquaporin 8	protein-coding
MACS_peak_593	chr16	89973730	89973939	+	79.82	NA	intron (NM_014972, intron 16 of 17)	intron (NM_014972, intron 16 of 17)	-10453	NM_002386	4157	Hs.513829	NM_002386	ENSG00000258839	MC1R	CMM5|MSH-R|SHEP2	melanocortin 1 receptor (alpha melanocyte stimulating hormone receptor)	protein-coding
MACS_peak_364	chr14	95860544	95860760	+	79.63	NA	Intergenic	(TGGA)n|Simple_repeat|Simple_repeat	15775	NR_026779	79686	Hs.41502	NM_024633		LINC00341	C14orf139|NCRNA00341	long intergenic non-protein coding RNA 341	ncRNA
MACS_peak_1268	chr7	1455329	1455607	+	79.62	NA	Intergenic	(TGGA)n|Simple_repeat|Simple_repeat	43641	NM_182924	79778	Hs.376617	NM_024723	ENSG00000164877	MICALL2	JRAB|MICAL-L2	MICAL-like 2	protein-coding
MACS_peak_1141	chr5	56197177	56197396	+	79.43	NA	Intergenic	(TCCA)n|Simple_repeat|Simple_repeat	-7801	NM_001171990	133383	Hs.85950	NM_153706	ENSG00000155542	SETD9	C5orf35	SET domain containing 9	protein-coding
MACS_peak_749	chr2	3688335	3688577	+	79.22	NA	intron (NM_001255982, intron 4 of 5)	CpG	-17330	NM_018436	55821	Hs.97899	NM_018436	ENSG00000151360	ALLC	ALC	allantoicase	protein-coding
MACS_peak_731	chr19	51547608	51547933	+	79.20	NA	Intergenic	MER4D|LTR|ERV1	-9622	NM_145895	43849	Hs.411572	NM_019598	ENSG00000186474	KLK12	KLK-L5|KLKL5	kallikrein related peptidase 12	protein-coding
MACS_peak_361	chr14	93144857	93145140	+	78.54	NA	intron (NM_024832, intron 8 of 9)	(CCCA)n|Simple_repeat|Simple_repeat	70049	NM_001008530	5641	Hs.18069	NM_005606	ENSG00000100600	LGMN	AEP|LGMN1|PRSC1	legumain	protein-coding
MACS_peak_563	chr16	87592497	87592872	+	78.53	NA	Intergenic	L1ME2z|LINE|L1	-42757	NR_073379	57338	Hs.592068	NM_020655	ENSG00000154118	JPH3	CAGL237|HDL2|JP-3|JP3|TNRC22	junctophilin 3	protein-coding
MACS_peak_409	chr15	50374089	50374412	+	78.52	NA	intron (NR_073596, intron 2 of 27)	intron (NR_073596, intron 2 of 27)	31263	NR_073598	79895	Hs.511311	NM_024837	ENSG00000104043	ATP8B4	ATPIM	ATPase, class I, type 8B, member 4	protein-coding
MACS_peak_412	chr15	65597070	65597350	+	78.52	NA	Intergenic	Intergenic	-18029	NM_001316944	54956	Hs.30634	NM_017851	ENSG00000138617	PARP16	ARTD15|C15orf30|pART15	poly(ADP-ribose) polymerase family member 16	protein-coding
MACS_peak_291	chr12	126011702	126011911	+	78.48	NA	intron (NM_052907, intron 4 of 8)	(TCCA)n|Simple_repeat|Simple_repeat	-95192	NM_001286219	114795	Hs.524838	NM_052907	ENSG00000139364	TMEM132B	-	transmembrane protein 132B	protein-coding
MACS_peak_232	chr12	306207	306382	+	78.48	NA	intron (NM_003044, intron 11 of 16)	(TCCA)n|Simple_repeat|Simple_repeat	-6517	NR_120475	101929384	Hs.569138	NR_120475	ENSG00000256577	LOC101929384	-	uncharacterized LOC101929384	ncRNA
MACS_peak_292	chr12	126012129	126012413	+	78.36	NA	intron (NM_052907, intron 4 of 8)	(TCCA)n|Simple_repeat|Simple_repeat	-94727	NM_001286219	114795	Hs.524838	NM_052907	ENSG00000139364	TMEM132B	-	transmembrane protein 132B	protein-coding
MACS_peak_660	chr17	78492222	78492468	+	78.30	NA	Intergenic	(TCCA)n|Simple_repeat|Simple_repeat	-26280	NM_020761	57521	Hs.133044	NM_020761	ENSG00000141564	RPTOR	KOG1|Mip1	regulatory associated protein of MTOR, complex 1	protein-coding
MACS_peak_664	chr17	80104876	80105161	+	78.15	NA	intron (NM_198082, intron 14 of 16)	(TGGA)n|Simple_repeat|Simple_repeat	-48912	NM_004104	2194	Hs.83190	NM_004104	ENSG00000169710	FASN	FAS|OA-519|SDR27X1	fatty acid synthase	protein-coding
MACS_peak_615	chr17	21139613	21139860	+	78.07	NA	Intergenic	(TCCA)n|Simple_repeat|Simple_repeat	16842	NM_152914	256302	Hs.654713	NM_152914	ENSG00000274180	NATD1	C17orf103|Gtlf3b	N-acetyltransferase domain containing 1	protein-coding
MACS_peak_607	chr17	18981309	18981520	+	77.98	NA	Intergenic	(TGGG)n|Simple_repeat|Simple_repeat	-15112	NM_001291904	79999	Hs.677375	NM_024934		LOC79999	-	uncharacterized LOC79999	protein-coding
MACS_peak_390	chr14	105881082	105881305	+	77.85	NA	TTS (NM_001195082)	TTS (NM_001195082)	4883	NR_125384	100507437	Hs.676548	NR_125384	ENSG00000251602	LOC100507437	-	uncharacterized LOC100507437	ncRNA
MACS_peak_438	chr15	96454881	96455200	+	77.65	NA	Intergenic	Intergenic	-414117	NM_001145155	7026	Hs.347991	NM_021005	ENSG00000185551	NR2F2	ARP1|CHTD4|COUPTFB|COUPTFII|NF-E3|NR2F1|SVP40|TFCOUP2	nuclear receptor subfamily 2, group F, member 2	protein-coding
MACS_peak_1092	chr4	7976000	7976249	+	77.62	NA	intron (NM_001286688, intron 14 of 14)	(TCCA)n|Simple_repeat|Simple_repeat	30984	NR_029511	407052		NR_029511	ENSG00000207807	MIR95	MIRN95|hsa-mir-95|miR-95	microRNA 95	ncRNA
MACS_peak_676	chr18	43382631	43382991	+	77.59	NA	Intergenic	Intergenic	-22734	NM_213602	284266	Hs.287692	NM_213602	ENSG00000197046	SIGLEC15	CD33L3|HsT1361|SIGLEC-15	sialic acid binding Ig-like lectin 15	protein-coding
MACS_peak_1394	chr8	143094184	143094478	+	77.59	NA	Intergenic	Intergenic	-14674	NR_130468	100616374		NR_130468	ENSG00000265612	MIR4539	-	microRNA 4539	ncRNA
MACS_peak_432	chr15	88123845	88124204	+	77.59	NA	Intergenic	Intergenic	3864	NR_026869	145978	Hs.350808	NM_152454	ENSG00000259527	LINC00052	NCRNA00052|TMEM83	long intergenic non-protein coding RNA 52	ncRNA
MACS_peak_1289	chr7	73485550	73485838	+	77.54	NA	Intergenic	Intergenic	-12413	NM_002314	3984	Hs.647035	NM_002314	ENSG00000106683	LIMK1	LIMK|LIMK-1	LIM domain kinase 1	protein-coding
MACS_peak_1119	chr5	1098713	1099001	+	77.54	NA	intron (NM_006598, intron 1 of 23)	(CCCA)n|Simple_repeat|Simple_repeat	13315	NM_006598	10723	Hs.172613	NM_006598	ENSG00000113504	SLC12A7	KCC4	solute carrier family 12 (potassium/chloride transporter), member 7	protein-coding
MACS_peak_266	chr12	111644561	111644891	+	77.26	NA	intron (NM_015267, intron 1 of 21)	(TGGA)n|Simple_repeat|Simple_repeat	-97220	NR_106818	102465455		NR_106818	ENSG00000273700	MIR6760	hsa-mir-6760	microRNA 6760	ncRNA
MACS_peak_989	chr3	10495672	10495886	+	77.23	NA	intron (NM_001001331, intron 1 of 22)	L2c|LINE|L2	51489	NM_001001331	491	Hs.268942	NM_001683	ENSG00000157087	ATP2B2	PMCA2|PMCA2a|PMCA2i	ATPase, Ca++ transporting, plasma membrane 2	protein-coding
MACS_peak_202	chr11	70622975	70623233	+	77.18	NA	intron (NM_012309, intron 11 of 22)	intron (NM_012309, intron 11 of 22)	-85791	NR_073536	220070	Hs.326766	NM_145308	ENSG00000171671	SHANK2-AS3	C11orf76	SHANK2 antisense RNA 3	ncRNA
MACS_peak_540	chr16	82815067	82815348	+	77.02	NA	intron (NR_110938, intron 1 of 2)	(TCCA)n|Simple_repeat|Simple_repeat	8283	NR_110938	101928446	Hs.684007	NR_110938	ENSG00000260862	LOC101928446	-	uncharacterized LOC101928446	ncRNA
MACS_peak_1161	chr5	131714307	131714603	+	76.80	NA	intron (NM_001308122, intron 3 of 10)	intron (NM_001308122, intron 3 of 10)	-8847	NR_110997	553103	Hs.570908	NR_110997	ENSG00000233006	LOC553103	-	uncharacterized LOC553103	ncRNA
MACS_peak_109	chr10	2564630	2564862	+	76.80	NA	Intergenic	CpG	-207478	NR_038884	399708	Hs.521270	NR_038884		LINC00701	-	long intergenic non-protein coding RNA 701	ncRNA
MACS_peak_328	chr13	28564803	28565084	+	76.80	NA	Intergenic	(TATATG)n|Simple_repeat|Simple_repeat	-2169	NM_001105577	646625	Hs.705356	NM_001105577		URAD	PRHOXNB	ureidoimidazoline (2-oxo-4-hydroxy-4-carboxy-5-) decarboxylase	protein-coding
MACS_peak_360	chr14	93144192	93144460	+	76.80	NA	intron (NM_024832, intron 8 of 9)	(TCCA)n|Simple_repeat|Simple_repeat	70721	NM_001008530	5641	Hs.18069	NM_005606	ENSG00000100600	LGMN	AEP|LGMN1|PRSC1	legumain	protein-coding
MACS_peak_1224	chr6	36692459	36692739	+	76.80	NA	intron (NM_001257357, intron 9 of 13)	intron (NM_001257357, intron 9 of 13)	26971	NM_001257357	401258	Hs.485258	NM_207498	ENSG00000255587	RAB44	RASD3|RASL13|dJ431A14.3	RAB44, member RAS oncogene family	protein-coding
MACS_peak_1152	chr5	115413129	115413345	+	76.74	NA	Intergenic	Intergenic	-7436	NM_016144	51397	Hs.483136	NM_016144	ENSG00000145781	COMMD10	PTD002	COMM domain containing 10	protein-coding
MACS_peak_128	chr10	19521428	19521644	+	76.74	NA	intron (NM_001142308, intron 18 of 39)	intron (NM_001142308, intron 18 of 39)	183836	NM_001142308	340895	Hs.646734	NM_001142308	ENSG00000204740	MALRD1	C10orf112|DIET1|bA265G8.2	MAM and LDL receptor class A domain containing 1	protein-coding
MACS_peak_700	chr19	30381846	30382179	+	76.70	NA	Intergenic	(TCCA)n|Simple_repeat|Simple_repeat	-32539	NM_001252641	8725	Hs.466391	NM_003796	ENSG00000105176	URI1	C19orf2|NNX3|PPP1R19|RMP|URI	URI1, prefoldin-like chaperone	protein-coding
MACS_peak_437	chr15	92992510	92992784	+	76.64	NA	intron (NM_006011, intron 5 of 5)	L1PA16|LINE|L1	22129	NR_126501	104613533	Hs.97584	NR_126501	ENSG00000259170	LOC104613533	-	uncharacterized LOC104613533	ncRNA
MACS_peak_1313	chr7	102131225	102131612	+	76.60	NA	intron (NM_001277335, intron 16 of 19).2	intron (NM_001277335, intron 16 of 19).2	-12037	NM_006234	5439	Hs.654952	NM_006234	ENSG00000005075	POLR2J	POLR2J1|RPB11|RPB11A|RPB11m|hRPB14	polymerase (RNA) II (DNA directed) polypeptide J, 13.3kDa	protein-coding
MACS_peak_1518	chrUn_gl000214	112308	112751	+	76.60	NA	NA	(CCCTAA)n|Simple_repeat|Simple_repeat	NA	NA
MACS_peak_7	chr1	2616183	2616540	+	76.59	NA	intron (NM_001242672, intron 4 of 6)	intron (NM_001242672, intron 4 of 6)	-51880	NM_033467	79258	Hs.591453	NM_033467	ENSG00000142606	MMEL1	MMEL2|NEP2|NEPII|NL1|NL2|SEP	membrane metallo-endopeptidase-like 1	protein-coding
MACS_peak_616	chr17	21260092	21260310	+	76.26	NA	Intergenic	(TCCA)n|Simple_repeat|Simple_repeat	-19498	NM_021012	3768	Hs.200629	NM_021012	ENSG00000184185	KCNJ12	IRK-2|IRK2|KCNJN1|Kir2.2|Kir2.2v|hIRK|hIRK1|hkir2.2x|kcnj12x	potassium channel, inwardly rectifying subfamily J, member 12	protein-coding
MACS_peak_281	chr12	120730694	120731092	+	76.25	NA	Intergenic	Intergenic	-9231	NM_012240	23409	Hs.50861	NM_012240	ENSG00000089163	SIRT4	SIR2L4	sirtuin 4	protein-coding
MACS_peak_927	chr20	62074520	62074879	+	76.25	NA	intron (NM_172106, intron 4 of 15)	(CCA)n|Simple_repeat|Simple_repeat	29294	NM_004518	3785	Hs.161851	NM_004518	ENSG00000075043	KCNQ2	BFNC|BFNS1|EBN|EBN1|EIEE7|ENB1|HNSPC|KCNA11|KV7.2|KVEBN1	potassium channel, voltage gated KQT-like subfamily Q, member 2	protein-coding
MACS_peak_23	chr1	17066931	17067199	+	76.25	NA	Intergenic	U1|snRNA|snRNA	-6109	NM_001282321	729574		NM_001282321	ENSG00000237847	FAM231A	FAM231C	family with sequence similarity 231, member A	protein-coding
MACS_peak_804	chr2	133151525	133151839	+	76.25	NA	Intergenic	Intergenic	-22465	NM_001508	2863	Hs.432395	NM_001508	ENSG00000183840	GPR39	-	G protein-coupled receptor 39	protein-coding
MACS_peak_103	chr10	1487330	1487612	+	76.19	NA	intron (NM_018702, intron 1 of 9)	(TCCA)n|Simple_repeat|Simple_repeat	-81354	NR_033387	642394	Hs.568831	NM_001098830	ENSG00000205696	ADARB2-AS1	C10orf109|NCRNA00168|bA466B20.1	ADARB2 antisense RNA 1	ncRNA
MACS_peak_606	chr17	18967028	18967397	+	76.11	NA	Intergenic	Intergenic	-16876	NM_006613	10750	Hs.567416	NM_006613		GRAP	-	GRB2-related adaptor protein	protein-coding
MACS_peak_394	chr14	106156823	106157155	+	76.09	NA	Intergenic	(CA)n|Simple_repeat|Simple_repeat	-17845	NR_046211	2003	Hs.744419	NR_046211		ELK2AP	ELK2|ELK2.1|ELK2P1	ELK2A, member of ETS oncogene family, pseudogene	pseudo
MACS_peak_671	chr18	925799	926018	+	76.02	NA	Intergenic	(CCAA)n|Simple_repeat|Simple_repeat	20711	NM_001117	116	Hs.531719	NM_001117	ENSG00000141433	ADCYAP1	PACAP	adenylate cyclase activating polypeptide 1 (pituitary)	protein-coding
MACS_peak_753	chr2	9916897	9917193	+	75.93	NA	Intergenic	(TGGA)n|Simple_repeat|Simple_repeat	-66526	NM_005680	9014	Hs.584833	NM_005680	ENSG00000115750	TAF1B	MGC:9349|RAF1B|RAFI63|SL1|TAFI63	TATA box binding protein (TBP)-associated factor, RNA polymerase I, B, 63kDa	protein-coding
MACS_peak_443	chr15	98980911	98981238	+	75.80	NA	3' UTR (NM_182562, exon 7 of 7)	3' UTR (NM_182562, exon 7 of 7)	76537	NM_182562	283777	Hs.668070	NM_182562	ENSG00000185087	FAM169B	-	family with sequence similarity 169, member B	protein-coding
MACS_peak_689	chr19	16242312	16242532	+	75.78	NA	intron (NM_005370, intron 7 of 7)	(TGGA)n|Simple_repeat|Simple_repeat	-2416	NM_001291274	84941	Hs.631617	NM_032855	ENSG00000196684	HSH2D	ALX|HSH2	hematopoietic SH2 domain containing	protein-coding
MACS_peak_244	chr12	46595354	46595755	+	75.66	NA	intron (NM_001278389, intron 12 of 16)	intron (NM_001278389, intron 12 of 16)	64724	NM_001278389	81539	Hs.533770	NM_030674	ENSG00000111371	SLC38A1	ATA1|NAT2|SAT1|SNAT1	solute carrier family 38, member 1	protein-coding
MACS_peak_142	chr10	103578127	103578385	+	75.64	NA	promoter-TSS (NM_012215)	promoter-TSS (NM_012215)	-34	NM_001142434	10724	Hs.500842	NM_012215	ENSG00000198408	MGEA5	MEA5|NCOAT|OGA	meningioma expressed antigen 5 (hyaluronidase)	protein-coding
MACS_peak_1105	chr4	49337370	49337713	+	75.59	NA	Intergenic	(TTAGGG)n|Simple_repeat|Simple_repeat	348882	NM_001286791	80157	Hs.479703	NM_025087	ENSG00000109182	CWH43	CWH43-C	cell wall biogenesis 43 C-terminal homolog	protein-coding
MACS_peak_167	chr11	2148170	2148391	+	75.54	NA	Intergenic	(TGGA)n|Simple_repeat|Simple_repeat	7159	NR_030158	619552		NR_030158		MIR483	MIRN483|hsa-mir-483|mir-483	microRNA 483	ncRNA
MACS_peak_760	chr2	20185023	20185209	+	75.46	NA	intron (NM_001006657, intron 2 of 27)	intron (NM_001006657, intron 2 of 27)	4768	NM_001006657	57539	Hs.205427	NM_020779	ENSG00000118965	WDR35	CED2|IFT121|IFTA1|SRTD7	WD repeat domain 35	protein-coding
MACS_peak_1376	chr8	128882738	128883208	+	75.34	NA	intron (NR_003367, intron 1 of 8)	MIRb|SINE|MIR	74765	NR_031609	100302185		NR_031609	ENSG00000275264	MIR1204	hsa-mir-1204	microRNA 1204	ncRNA
MACS_peak_1509	chr9	140444809	140445190	+	75.28	NA	promoter-TSS (NM_001098537)	promoter-TSS (NM_001098537)	22	NM_152286	375775	Hs.294147	NM_152286	ENSG00000130653	PNPLA7	C9orf111|NTE-R1|NTEL1	patatin-like phospholipase domain containing 7	protein-coding
MACS_peak_168	chr11	3674983	3676131	+	75.27	NA	intron (NM_004314, intron 1 of 4)	intron (NM_004314, intron 1 of 4)	9196	NM_004314	417	Hs.382188	NM_004314	ENSG00000129744	ART1	ART2|ARTC1|CD296|RT6	ADP-ribosyltransferase 1	protein-coding
MACS_peak_842	chr20	18003217	18003488	+	74.89	NA	Intergenic	Intergenic	35174	NM_021220	58495	Hs.661013	NM_021220	ENSG00000125850	OVOL2	EUROIMAGE566589|ZNF339	ovo-like zinc finger 2	protein-coding
MACS_peak_1183	chr5	173237730	173238128	+	74.88	NA	Intergenic	(TGG)n|Simple_repeat|Simple_repeat	-19984	NR_108028	101928154	Hs.366725	NR_108028		LINC01485	-	long intergenic non-protein coding RNA 1485	ncRNA
MACS_peak_405	chr15	38885661	38885885	+	74.83	NA	Intergenic	Intergenic	-28766	NM_001128602	10125	Hs.591127	NM_005739	ENSG00000172575	RASGRP1	CALDAG-GEFI|CALDAG-GEFII|RASGRP|V|hRasGRP1	RAS guanyl releasing protein 1 (calcium and DAG-regulated)	protein-coding
MACS_peak_1534	chrY	13663116	13663216	+	74.61	NA	Intergenic	(GAATG)n|Satellite|Satellite	870223	NR_033667	352887	Hs.546221	NR_033667	ENSG00000206159	GYG2P1	GYG2P	glycogenin 2 pseudogene 1	pseudo
MACS_peak_1508	chr9	140196658	140196865	+	74.46	NA	promoter-TSS (NM_001004354)	promoter-TSS (NM_001004354)	-58	NM_001004354	441478	Hs.535075	NM_001004354		NRARP	-	NOTCH-regulated ankyrin repeat protein	protein-coding
MACS_peak_634	chr17	55977179	55977586	+	74.37	NA	intron (NM_001271875, intron 1 of 10)	intron (NM_001271875, intron 1 of 10)	3368	NM_001292025	404093	Hs.46679	NM_001271875	ENSG00000180891	CUEDC1	-	CUE domain containing 1	protein-coding
MACS_peak_310	chr12	132172932	132173206	+	74.24	NA	Intergenic	Intergenic	-22563	NM_004592	6433	Hs.308171	NM_004592	ENSG00000061936	SFSWAP	SFRS8|SWAP	splicing factor, suppressor of white-apricot family	protein-coding
MACS_peak_6	chr1	2583626	2584052	+	74.16	NA	intron (NM_001242672, intron 4 of 6)	intron (NM_001242672, intron 4 of 6)	-19358	NM_033467	79258	Hs.591453	NM_033467	ENSG00000142606	MMEL1	MMEL2|NEP2|NEPII|NL1|NL2|SEP	membrane metallo-endopeptidase-like 1	protein-coding
MACS_peak_631	chr17	48571128	48571491	+	73.95	NA	Intergenic	MER65C|LTR|ERV1	-14436	NM_032133	84073	Hs.398196	NM_032133	ENSG00000136449	MYCBPAP	AMAP-1|AMAP1	MYCBP associated protein	protein-coding
MACS_peak_1087	chr4	7545521	7545787	+	73.95	NA	intron (NM_020777, intron 3 of 26)	(TCCA)n|Simple_repeat|Simple_repeat	83899	NR_036238	100422826		NR_036238	ENSG00000266690	MIR4274	-	microRNA 4274	ncRNA
MACS_peak_759	chr2	19825830	19826096	+	73.95	NA	Intergenic	L1M2|LINE|L1	-242652	NR_033875	400946	Hs.289062	NR_033875	ENSG00000228784	LINC00954	-	long intergenic non-protein coding RNA 954	ncRNA
MACS_peak_267	chr12	111763892	111764085	+	73.63	NA	intron (NM_015267, intron 18 of 21)	intron (NM_015267, intron 18 of 21)	22042	NR_106818	102465455		NR_106818	ENSG00000273700	MIR6760	hsa-mir-6760	microRNA 6760	ncRNA
MACS_peak_978	chr22	28044765	28045073	+	73.61	NA	Intergenic	(TGGA)n|Simple_repeat|Simple_repeat	152567	NM_002430	4330	Hs.268515	NM_002430	ENSG00000169184	MN1	MGCR|MGCR1|MGCR1-PEN|dJ353E16.2	meningioma (disrupted in balanced translocation) 1	protein-coding
MACS_peak_1093	chr4	7976333	7976602	+	73.33	NA	intron (NM_001286688, intron 14 of 14)	(TCCA)n|Simple_repeat|Simple_repeat	30641	NR_029511	407052		NR_029511	ENSG00000207807	MIR95	MIRN95|hsa-mir-95|miR-95	microRNA 95	ncRNA
MACS_peak_392	chr14	106069299	106069530	+	73.22	NA	Intergenic	(CAGCC)n|Simple_repeat|Simple_repeat	-18039	NR_107059	102466889		NR_107059	ENSG00000277030	MIR8071-2	hsa-mir-8071-2	microRNA 8071-2	ncRNA
MACS_peak_201	chr11	70539726	70539970	+	73.13	NA	intron (NM_012309, intron 12 of 22)	intron (NM_012309, intron 12 of 22)	-31903	NR_110766	22941	Hs.268726	NM_012309	ENSG00000162105	SHANK2	AUTS17|CORTBP1|CTTNBP1|ProSAP1|SHANK|SPANK-3	SH3 and multiple ankyrin repeat domains 2	protein-coding
MACS_peak_120	chr10	6502809	6502970	+	73.11	NA	intron (NM_006257, intron 14 of 17)	(TCCA)n|Simple_repeat|Simple_repeat	119374	NM_001282644	5588	Hs.498570	NM_006257	ENSG00000065675	PRKCQ	PRKCT|nPKC-theta	protein kinase C, theta	protein-coding
MACS_peak_1055	chr3	195442996	195443490	+	73.07	NA	Intergenic	LTR10A|LTR|ERV1	-4510	NM_152673	200958	Hs.308992	NM_020790	ENSG00000176945	MUC20	MUC-20	mucin 20, cell surface associated	protein-coding
MACS_peak_191	chr11	69030702	69030938	+	73.06	NA	Intergenic	(TCCA)n|Simple_repeat|Simple_repeat	-30785	NM_001300923	26579	Hs.523848	NM_138768	ENSG00000172927	MYEOV	OCIM	myeloma overexpressed	protein-coding
MACS_peak_1419	chr9	91345748	91346032	+	73.04	NA	Intergenic	(TCCA)n|Simple_repeat|Simple_repeat	14930	NR_036252	100423015		NR_036252	ENSG00000265873	MIR4289	-	microRNA 4289	ncRNA
MACS_peak_789	chr2	113103871	113104182	+	73.04	NA	Intergenic	(CCA)n|Simple_repeat|Simple_repeat	70848	NM_198581	376940	Hs.190477	NM_198581	ENSG00000188177	ZC3H6	ZC3HDC6	zinc finger CCCH-type containing 6	protein-coding
MACS_peak_226	chr11	117509873	117510194	+	73.04	NA	intron (NM_020693, intron 3 of 32)	(TGGG)n|Simple_repeat|Simple_repeat	157943	NM_020693	57453	Hs.659513	NM_020693	ENSG00000177103	DSCAML1	DSCAM2	Down syndrome cell adhesion molecule like 1	protein-coding
MACS_peak_1085	chr4	6513155	6513419	+	73.04	NA	intron (NM_001206994, intron 2 of 9)	(TGG)n|Simple_repeat|Simple_repeat	-38961	NM_020416	5522	Hs.479069	NM_020416	ENSG00000074211	PPP2R2C	B55-GAMMA|IMYPNO|IMYPNO1|PR52|PR55G	protein phosphatase 2, regulatory subunit B, gamma	protein-coding
MACS_peak_613	chr17	20457065	20457227	+	72.80	NA	Intergenic	Intergenic	-25891	NM_001190790	256223	Hs.131916	NM_001190790	ENSG00000214819	CDRT15L2	-	CMT1A duplicated region transcript 15-like 2	protein-coding
MACS_peak_813	chr2	164540083	164540349	+	72.77	NA	intron (NM_018086, intron 2 of 2)	MER5B|DNA|hAT-Charlie	52297	NM_018086	55137	Hs.593650	NM_018086		FIGN	-	fidgetin	protein-coding
MACS_peak_644	chr17	65192487	65192938	+	72.68	NA	intron (NM_014877, intron 7 of 32)	(TGGA)n|Simple_repeat|Simple_repeat	48607	NM_014877	9931	Hs.370140	NM_014877	ENSG00000198265	HELZ	DHRC|DRHC|HUMORF5	helicase with zinc finger	protein-coding
MACS_peak_1012	chr3	64917252	64918981	+	72.67	NA	intron (NR_038264, intron 4 of 5)	MIR|SINE|MIR	212433	NR_030317	693126		NR_030317	ENSG00000207689	MIR548A2	MIRN548A2	microRNA 548a-2	ncRNA
MACS_peak_248	chr12	53297767	53298137	+	72.31	NA	intron (NR_045962, intron 2 of 8)	intron (NR_045962, intron 2 of 8)	916	NM_002273	3856	Hs.533782	NM_002273	ENSG00000170421	KRT8	CARD2|CK-8|CK8|CYK8|K2C8|K8|KO	keratin 8, type II	protein-coding
MACS_peak_1013	chr3	65922492	65922766	+	72.29	NA	intron (NM_015520, intron 1 of 24)	(TGG)n|Simple_repeat|Simple_repeat	43138	NR_046575	100873983	Hs.663889	NR_046575	ENSG00000240175	MAGI1-AS1	-	MAGI1 antisense RNA 1	ncRNA
MACS_peak_1448	chr9	116502872	116503171	+	72.09	NA	Intergenic	(CCCCAA)n|Simple_repeat|Simple_repeat	-135541	NM_133374	114991	Hs.349208	NM_133374	ENSG00000157657	ZNF618	FP13169|NEDD10	zinc finger protein 618	protein-coding
MACS_peak_532	chr16	73288715	73288944	+	72.09	NA	Intergenic	(TCCA)n|Simple_repeat|Simple_repeat	-110483	NM_207385	388289	Hs.371893	NM_207385		C16orf47	-	chromosome 16 open reading frame 47	protein-coding
MACS_peak_280	chr12	119145549	119146038	+	72.07	NA	Intergenic	HAL1-2a_MD|LINE|L1	-273507	NM_194286	84530	Hs.744964	NM_194286	ENSG00000139767	SRRM4	KIAA1853|MU-MB-2.76|nSR100	serine/arginine repetitive matrix 4	protein-coding
MACS_peak_1195	chr5	177209584	177209749	+	71.98	NA	Intergenic	(CCCCAA)n|Simple_repeat|Simple_repeat	-2161	NM_173663	285596	Hs.368516	NM_173663	ENSG00000170074	FAM153A	NY-REN-7	family with sequence similarity 153, member A	protein-coding
MACS_peak_859	chr20	45417471	45418092	+	71.97	NA	Intergenic	(TG)n|Simple_repeat|Simple_repeat	79502	NM_030777	81031	Hs.305971	NM_030777	ENSG00000197496	SLC2A10	ATS|GLUT10	solute carrier family 2 (facilitated glucose transporter), member 10	protein-coding
MACS_peak_1461	chr9	130784565	130784824	+	71.96	NA	Intergenic	Intergenic	-41882	NM_001035254	399665	Hs.535972	NM_203305	ENSG00000167106	FAM102A	C9orf132|EEIG1|SYM-3A|bA203J24.7	family with sequence similarity 102, member A	protein-coding
MACS_peak_1166	chr5	154136041	154136246	+	71.85	NA	intron (NM_015315, intron 1 of 18)	CpG	43681	NM_015315	23367	Hs.292078	NM_015315	ENSG00000155506	LARP1	LARP	La ribonucleoprotein domain family, member 1	protein-coding
MACS_peak_206	chr11	70657606	70657844	+	71.64	NA	intron (NM_012309, intron 9 of 22)	(TCCA)n|Simple_repeat|Simple_repeat	-51170	NR_073536	220070	Hs.326766	NM_145308	ENSG00000171671	SHANK2-AS3	C11orf76	SHANK2 antisense RNA 3	ncRNA
MACS_peak_1411	chr9	400593	400915	+	71.57	NA	intron (NM_001193536, intron 25 of 46)	(CCA)n|Simple_repeat|Simple_repeat	-69540	NM_001256876	23189	Hs.306764	NM_015158	ENSG00000107104	KANK1	ANKRD15|CPSQ2|KANK	KN motif and ankyrin repeat domains 1	protein-coding
MACS_peak_681	chr19	816062	816340	+	71.52	NA	intron (NM_024888, intron 2 of 6)	(TCCA)n|Simple_repeat|Simple_repeat	2617	NR_036154	100422854		NR_036154	ENSG00000263414	MIR3187	mir-3187	microRNA 3187	ncRNA
MACS_peak_11	chr1	3641838	3642158	+	71.40	NA	intron (NM_001204187, intron 6 of 11)	(TGGA)n|Simple_repeat|Simple_repeat	21337	NR_033712	57212	Hs.49658	NM_207306	ENSG00000227372	TP73-AS1	KIAA0495|PDAM	TP73 antisense RNA 1	ncRNA
MACS_peak_499	chr16	18812753	18813015	+	71.30	NA	promoter-TSS (NM_001313858)	promoter-TSS (NM_001313858)	116	NM_015161	23204	Hs.634882	NM_015161	ENSG00000170540	ARL6IP1	AIP1|ARL6IP|ARMER|SPG61	ADP-ribosylation factor like GTPase 6 interacting protein 1	protein-coding
MACS_peak_1116	chr5	584233	584473	+	71.23	NA	Intergenic	(TGGG)n|Simple_repeat|Simple_repeat	27972	NR_103444	100996325	Hs.575249	NR_103444		LOC100996325	-	uncharacterized LOC100996325	ncRNA
MACS_peak_1402	chr8	144300156	144300359	+	71.15	NA	Intergenic	(CCA)n|Simple_repeat|Simple_repeat	5189	NM_178172	338328	Hs.426410	NM_178172	ENSG00000277494	GPIHBP1	GPI-HBP1|HYPL1D	glycosylphosphatidylinositol anchored high density lipoprotein binding protein 1	protein-coding
MACS_peak_1117	chr5	584855	585135	+	71.13	NA	Intergenic	(TGGA)n|Simple_repeat|Simple_repeat	27330	NR_103444	100996325	Hs.575249	NR_103444		LOC100996325	-	uncharacterized LOC100996325	ncRNA
MACS_peak_1238	chr6	125523382	125523719	+	71.09	NA	intron (NM_001292026, intron 1 of 4)	intron (NM_001292026, intron 1 of 4)	48130	NM_001003395	7164	Hs.591347	NM_003287	ENSG00000111907	TPD52L1	D53|hD53	tumor protein D52-like 1	protein-coding
MACS_peak_237	chr12	8527774	8528015	+	71.01	NA	intron (NR_024420, intron 1 of 1)	(TGGA)n|Simple_repeat|Simple_repeat	15454	NR_024420	389634	Hs.434403	NM_001012988	ENSG00000226091	LINC00937	-	long intergenic non-protein coding RNA 937	ncRNA
MACS_peak_335	chr13	113886249	113886490	+	71.01	NA	intron (NM_003589, intron 5 of 19)	(CCA)n|Simple_repeat|Simple_repeat	22550	NM_001008895	8451	Hs.339735	NM_003589	ENSG00000139842	CUL4A	-	cullin 4A	protein-coding
MACS_peak_1226	chr6	44214766	44215071	+	70.89	NA	5' UTR (NM_007355, exon 1 of 12)	5' UTR (NM_007355, exon 1 of 12)	223	NM_007355	3326	Hs.509736	NM_007355	ENSG00000096384	HSP90AB1	D6S182|HSP84|HSP90B|HSPC2|HSPCB	heat shock protein 90kDa alpha (cytosolic), class B member 1	protein-coding
MACS_peak_1288	chr7	73467895	73468218	+	70.87	NA	intron (NM_001278916, intron 17 of 28)	(TGGA)n|Simple_repeat|Simple_repeat	25937	NM_001278915	2006	Hs.647061	NM_000501	ENSG00000049540	ELN	SVAS|WBS|WS	elastin	protein-coding
MACS_peak_1535	chrY	28787487	28787640	+	70.81	NA	Intergenic	(GAGTG)n|Simple_repeat|Simple_repeat	912926	NR_002176	474148	Hs.511777	NR_002176	ENSG00000280961	TTTY3B	LNCRNA00122|NCRNA00122	testis-specific transcript, Y-linked 3B (non-protein coding)	ncRNA
MACS_peak_1077	chr4	1392164	1392406	+	70.78	NA	Intergenic	Intergenic	6945	NM_175918	285464	Hs.26410	NM_175918	ENSG00000179979	CRIPAK	-	cysteine-rich PAK1 inhibitor	protein-coding
MACS_peak_645	chr17	65559742	65560325	+	70.76	NA	intron (NM_012417, intron 4 of 8)	(TAGA)n|Simple_repeat|Simple_repeat	-153916	NM_001303272	25926	Hs.463936	NM_015462	ENSG00000130935	NOL11	-	nucleolar protein 11	protein-coding
MACS_peak_1259	chr7	522341	522623	+	70.74	NA	Intergenic	(TGGA)n|Simple_repeat|Simple_repeat	36999	NM_002607	5154	Hs.535898	NM_002607	ENSG00000197461	PDGFA	PDGF-A|PDGF1	platelet-derived growth factor alpha polypeptide	protein-coding
MACS_peak_426	chr15	80323251	80323491	+	70.63	NA	Intergenic	(TCCA)n|Simple_repeat|Simple_repeat	-28539	NM_001242917	54469	Hs.596679	NM_019006	ENSG00000086666	ZFAND6	AWP1|ZA20D3|ZFAND5B	zinc finger, AN1-type domain 6	protein-coding
MACS_peak_1214	chr6	11313483	11313726	+	70.60	NA	intron (NM_001142393, intron 1 of 7)	(TGGA)n|Simple_repeat|Simple_repeat	68977	NM_001142393	4739	Hs.37982	NM_006403	ENSG00000111859	NEDD9	CAS-L|CAS2|CASL|CASS2|HEF1	neural precursor cell expressed, developmentally down-regulated 9	protein-coding
MACS_peak_1464	chr9	132219467	132219819	+	70.56	NA	Intergenic	(TGGA)n|Simple_repeat|Simple_repeat	-31296	NR_038955	100506190	Hs.529860	NR_038955		LINC00963	-	long intergenic non-protein coding RNA 963	ncRNA
MACS_peak_754	chr2	10539271	10539691	+	70.52	NA	intron (NM_001258357, intron 2 of 4)	(CCA)n|Simple_repeat|Simple_repeat	30591	NM_001258359	3241	Hs.580427	NM_002149	ENSG00000115756	HPCAL1	BDR1|HLP2|VILIP-3	hippocalcin-like 1	protein-coding
MACS_peak_705	chr19	33417974	33418193	+	70.47	NA	intron (NM_032816, intron 9 of 18)	(TCCA)n|Simple_repeat|Simple_repeat	44852	NM_032816	84902	Hs.599703	NM_032816	ENSG00000121289	CEP89	CCDC123|CEP123	centrosomal protein 89kDa	protein-coding
MACS_peak_871	chr20	48235471	48235790	+	70.45	NA	Intergenic	(TGGA)n|Simple_repeat|Simple_repeat	-50923	NM_000961	5740	Hs.302085	NM_000961	ENSG00000124212	PTGIS	CYP8|CYP8A1|PGIS|PTGI	prostaglandin I2 (prostacyclin) synthase	protein-coding
MACS_peak_1187	chr5	174847547	174847836	+	70.34	NA	Intergenic	(TCCA)n|Simple_repeat|Simple_repeat	23472	NM_000794	1812	Hs.2624	NM_000794	ENSG00000184845	DRD1	DADR|DRD1A	dopamine receptor D1	protein-coding
MACS_peak_1061	chr3	195680922	195681270	+	70.24	NA	Intergenic	G-rich|Low_complexity|Low_complexity	36054	NR_003264	255812	Hs.566872	NR_003264	ENSG00000185485	SDHAP1	SDHAL1|SDHALP1	succinate dehydrogenase complex subunit A, flavoprotein pseudogene 1	pseudo
MACS_peak_1478	chr9	136258418	136258718	+	70.23	NA	intron (NM_153710, intron 7 of 17)	(TGGG)n|Simple_repeat|Simple_repeat	-13748	NM_001280788	6836	Hs.512465	NM_033161	ENSG00000148248	SURF4	ERV29	surfeit 4	protein-coding
MACS_peak_1158	chr5	128027138	128027394	+	70.22	NA	Intergenic	Intergenic	-153531	NM_001999	2201	Hs.519294	NM_001999	ENSG00000138829	FBN2	CCA|DA9|EOMD	fibrillin 2	protein-coding
MACS_peak_1264	chr7	1311695	1311929	+	70.16	NA	Intergenic	Intergenic	39158	NM_001080461	340260	Hs.232272	NM_001080461		UNCX	UNCX4.1	UNC homeobox	protein-coding
MACS_peak_1192	chr5	176018755	176019042	+	70.16	NA	intron (NM_001171976, intron 30 of 31)	(TGG)n|Simple_repeat|Simple_repeat	18233	NM_052899	114787	Hs.150549	NM_052899	ENSG00000169258	GPRIN1	GRIN1	G protein regulated inducer of neurite outgrowth 1	protein-coding
MACS_peak_672	chr18	4510833	4511033	+	70.16	NA	Intergenic	(TGG)n|Simple_repeat|Simple_repeat	-55667	NM_004746	9229	Hs.594640	NM_004746	ENSG00000170579	DLGAP1	DAP-1|DAP-1-ALPHA|DAP-1-BETA|DAP1|DLGAP1A|DLGAP1B|GKAP|SAPAP1	discs, large (Drosophila) homolog-associated protein 1	protein-coding
MACS_peak_1322	chr7	132178422	132178561	+	70.09	NA	intron (NM_001105543, intron 2 of 3)	(TGGA)n|Simple_repeat|Simple_repeat	82832	NM_020911	91584	Hs.511454	NM_020911	ENSG00000221866	PLXNA4	FAYV2820|PLEXA4|PLXNA4A|PLXNA4B|PRO34003	plexin A4	protein-coding
MACS_peak_561	chr16	87255485	87255872	+	70.07	NA	intron (NR_110939, intron 2 of 2)	(CCA)n|Simple_repeat|Simple_repeat	9957	NR_110939	101928708	Hs.585717	NR_110939	ENSG00000261095	LOC101928708	-	uncharacterized LOC101928708	ncRNA
MACS_peak_126	chr10	11326253	11326514	+	70.05	NA	intron (NM_006561, intron 8 of 14)	(TGGG)n|Simple_repeat|Simple_repeat	60290	NR_126062	414196	Hs.729598	NM_001012713		CELF2-AS1	C10orf31	CELF2 antisense RNA 1	ncRNA
MACS_peak_1293	chr7	76628117	76628396	+	70.05	NA	intron (NR_023383, intron 2 of 10)	G-rich|Low_complexity|Low_complexity	18117	NR_023383	441263	Hs.675888	NR_023383	ENSG00000265479	DTX2P1-UPK3BP1-PMS2P11	PMS2L11|PMS2P11|PMSR6	DTX2P1-UPK3BP1-PMS2P11 readthrough transcribed pseudogene	pseudo
MACS_peak_51	chr1	114354180	114355190	+	70.04	NA	promoter-TSS (NR_125965)	promoter-TSS (NR_125965)	413	NR_130896	54665	Hs.486285	NM_018364	ENSG00000081019	RSBN1	ROSBIN	round spermatid basic protein 1	protein-coding
MACS_peak_1327	chr7	155000430	155000638	+	69.96	NA	Intergenic	(TG)n|Simple_repeat|Simple_repeat	-88952	NM_198337	3638	Hs.520819	NM_005542	ENSG00000186480	INSIG1	CL-6|CL6	insulin induced gene 1	protein-coding
MACS_peak_1247	chr6	166829544	166829790	+	69.95	NA	intron (NM_001006932, intron 20 of 21)	(CACCAT)n|Simple_repeat|Simple_repeat	-33166	NM_001270879	51660	Hs.172755	NM_016098	ENSG00000060762	MPC1	BRP44L|CGI-129|MPYCD|dJ68L15.3	mitochondrial pyruvate carrier 1	protein-coding
MACS_peak_799	chr2	129304513	129304759	+	69.95	NA	Intergenic	(TCCA)n|Simple_repeat|Simple_repeat	-228465	NM_004807	9394	Hs.512841	NM_004807	ENSG00000136720	HS6ST1	HH15|HS6ST	heparan sulfate 6-O-sulfotransferase 1	protein-coding
MACS_peak_64	chr1	151445702	151446076	+	69.93	NA	Intergenic	CpG	-13948	NM_001194938	23126	Hs.489873	NM_015100	ENSG00000143442	POGZ	MRD37|ZNF280E|ZNF635|ZNF635m	pogo transposable element with ZNF domain	protein-coding
MACS_peak_1386	chr8	141070589	141070849	+	69.93	NA	intron (NM_031466, intron 17 of 22)	(CAACC)n|Simple_repeat|Simple_repeat	-355420	NM_001282534	51305	Hs.493037	NM_001282534	ENSG00000169427	KCNK9	K2p9.1|KT3.2|TASK-3|TASK3	potassium channel, two pore domain subfamily K, member 9	protein-coding
MACS_peak_188	chr11	68877886	68878097	+	69.86	NA	Intergenic	(TCCA)n|Simple_repeat|Simple_repeat	27347	NR_036122	100422846		NR_036122	ENSG00000265539	MIR3164	-	microRNA 3164	ncRNA
MACS_peak_1042	chr3	153936609	153936937	+	69.68	NA	intron (NM_001251963, intron 10 of 14)	intron (NM_001251963, intron 10 of 14)	97624	NM_015595	26084	Hs.240845	NM_015595	ENSG00000114790	ARHGEF26	CSGEF|HMFN1864|SGEF	Rho guanine nucleotide exchange factor 26	protein-coding
MACS_peak_1261	chr7	591181	591355	+	69.55	NA	intron (NM_001164762, intron 9 of 10)	intron (NM_001164762, intron 9 of 10)	-10327	NR_132384	101927000	Hs.551793	NR_132384		LOC101927000	-	uncharacterized LOC101927000	ncRNA
MACS_peak_1515	chr9	141122126	141123860	+	69.42	NA	intron (NM_001145249, intron 5 of 6)	intron (NM_001145249, intron 5 of 6)	16356	NM_001145249	100132403	Hs.741123	NM_001145249		FAM157B	-	family with sequence similarity 157, member B	protein-coding
MACS_peak_949	chr21	42528200	42528516	+	69.34	NA	Intergenic	Intergenic	-8367	NR_024100	284835	Hs.106234	NR_024100	ENSG00000226496	LINC00323	C21orf130|NCRNA00323|PRED42	long intergenic non-protein coding RNA 323	ncRNA
MACS_peak_80	chr1	203469520	203469784	+	69.32	NA	intron (NM_014359, intron 5 of 7)	intron (NM_014359, intron 5 of 7)	6381	NM_014359	26254	Hs.632468	NM_014359	ENSG00000188770	OPTC	OPT	opticin	protein-coding
MACS_peak_36	chr1	31312596	31312807	+	69.27	NA	Intergenic	Intergenic	68779	NM_014654	9672	Hs.158287	NM_014654		SDC3	SDCN|SYND3	syndecan 3	protein-coding
MACS_peak_179	chr11	63778304	63778515	+	69.27	NA	intron (NM_014067, intron 4 of 10)	(TTGG)n|Simple_repeat|Simple_repeat	25084	NM_017670	55611	Hs.473788	NM_017670	ENSG00000167770	OTUB1	HSPC263|OTB1|OTU1	OTU deubiquitinase, ubiquitin aldehyde binding 1	protein-coding
MACS_peak_381	chr14	104670778	104670989	+	69.27	NA	Intergenic	(TCCA)n|Simple_repeat|Simple_repeat	65823	NM_015656	26153	Hs.134970	NM_015656	ENSG00000066735	KIF26A	-	kinesin family member 26A	protein-coding
MACS_peak_398	chr15	21312842	21314145	+	69.23	NA	Intergenic	(GCTG)n|Simple_repeat|Simple_repeat	167726	NR_040094	348120	Hs.116287	NR_040094	ENSG00000258710	LINC01193	CT60	long intergenic non-protein coding RNA 1193	ncRNA
MACS_peak_276	chr12	117869234	117869509	+	69.21	NA	Intergenic	(TGGA)n|Simple_repeat|Simple_repeat	-69764	NM_001204218	4842	Hs.654410	NM_000620	ENSG00000089250	NOS1	IHPS1|N-NOS|NC-NOS|NOS|bNOS|nNOS	nitric oxide synthase 1 (neuronal)	protein-coding
MACS_peak_515	chr16	28042057	28042359	+	69.21	NA	intron (NM_001109763, intron 1 of 6)	(GGATG)n|Simple_repeat|Simple_repeat	32622	NM_001109763	146395	Hs.91910	NM_144675	ENSG00000169181	GSG1L	PRO19651	GSG1-like	protein-coding
MACS_peak_1428	chr9	96424153	96424439	+	69.21	NA	intron (NM_005392, intron 12 of 21)	(TGGA)n|Simple_repeat|Simple_repeat	67173	NR_049853	100847045		NR_049853		MIR548AU	-	microRNA 548au	ncRNA
MACS_peak_284	chr12	121426132	121426382	+	69.12	NA	intron (NM_001306179, intron 1 of 9)	(TCCA)n|Simple_repeat|Simple_repeat	9886	NM_001306179	6927	Hs.654455	NM_000545	ENSG00000135100	HNF1A	HNF-1A|HNF1|IDDM20|LFB1|MODY3|TCF-1|TCF1	HNF1 homeobox A	protein-coding
MACS_peak_1194	chr5	177152770	177152984	+	69.02	NA	intron (NM_173663, intron 17 of 19)	intron (NM_173663, intron 17 of 19)	-53599	NR_026921	202181	Hs.189914	NR_026921		LOC202181	-	SUMO-interacting motifs containing 1 pseudogene	pseudo
MACS_peak_104	chr10	1487615	1487860	+	69.00	NA	intron (NM_018702, intron 1 of 9)	intron (NM_018702, intron 1 of 9)	-81088	NR_033387	642394	Hs.568831	NM_001098830	ENSG00000205696	ADARB2-AS1	C10orf109|NCRNA00168|bA466B20.1	ADARB2 antisense RNA 1	ncRNA
MACS_peak_297	chr12	131130583	131130814	+	68.80	NA	Intergenic	C-rich|Low_complexity|Low_complexity	-128288	NM_015347	23504	Hs.657441	NM_015347	ENSG00000060709	RIMBP2	PPP1R133|RBP2|RIM-BP2	RIMS binding protein 2	protein-coding
MACS_peak_1496	chr9	137896380	137896673	+	68.65	NA	Intergenic	L2c|LINE|L2	-70563	NM_014279	10439	Hs.522484	NM_006334	ENSG00000130558	OLFM1	AMY|NOE1|NOELIN1|OlfA	olfactomedin 1	protein-coding
MACS_peak_439	chr15	96646523	96646784	+	68.61	NA	Intergenic	MIRb|SINE|MIR	-222504	NM_001145155	7026	Hs.347991	NM_021005	ENSG00000185551	NR2F2	ARP1|CHTD4|COUPTFB|COUPTFII|NF-E3|NR2F1|SVP40|TFCOUP2	nuclear receptor subfamily 2, group F, member 2	protein-coding
MACS_peak_798	chr2	128346389	128346603	+	68.58	NA	intron (NM_001080527, intron 15 of 46)	(TGGG)n|Simple_repeat|Simple_repeat	-17959	NR_132317	105373609	Hs.677195	NR_132317		LOC105373609	-	uncharacterized LOC105373609	ncRNA
MACS_peak_970	chr21	47713557	47713883	+	68.54	NA	intron (NM_001314023, intron 3 of 4)	intron (NM_001314023, intron 3 of 4)	7476	NM_001314024	54059	Hs.474066	NM_058181	ENSG00000182362	YBEY	C21orf57	ybeY metallopeptidase (putative)	protein-coding
MACS_peak_358	chr14	91742789	91743041	+	68.52	NA	intron (NM_001080414, intron 29 of 29)	intron (NM_001080414, intron 29 of 29)	-22691	NM_003485	8111	Hs.8882	NM_003485	ENSG00000119714	GPR68	GPR12A|OGR1	G protein-coupled receptor 68	protein-coding
MACS_peak_152	chr10	130017582	130017835	+	68.48	NA	Intergenic	(CTCA)n|Simple_repeat|Simple_repeat	-66506	NR_120619	101927381	Hs.523342	NR_120619	ENSG00000280953	LINC01163	TCONS_00017722	long intergenic non-protein coding RNA 1163	ncRNA
MACS_peak_1338	chr7	158780964	158781258	+	68.44	NA	Intergenic	(TCCA)n|Simple_repeat|Simple_repeat	-19934	NR_024394	154822	Hs.544783	NM_198345	ENSG00000231419	LINC00689	-	long intergenic non-protein coding RNA 689	ncRNA
MACS_peak_1079	chr4	2285118	2285333	+	68.36	NA	intron (NM_001172659, intron 8 of 12)	(TCCA)n|Simple_repeat|Simple_repeat	-21486	NM_006454	10608	Hs.655020	NM_006454	ENSG00000123933	MXD4	MAD4|MST149|MSTP149|bHLHc12	MAX dimerization protein 4	protein-coding
MACS_peak_761	chr2	26708969	26709234	+	68.34	NA	intron (NM_001287489, intron 11 of 45)	(TGGG)n|Simple_repeat|Simple_repeat	-8191	NM_004802	9381	Hs.91608	NM_004802	ENSG00000115155	OTOF	AUNB1|DFNB6|DFNB9|FER1L2|NSRD9	otoferlin	protein-coding
MACS_peak_652	chr17	75480672	75480926	+	68.30	NA	intron (NM_001293697, intron 2 of 9)	(TGG)n|Simple_repeat|Simple_repeat	9474	NM_001113495	10801	Hs.440932	NM_006640	ENSG00000184640	SEPT9	AF17q25|MSF|MSF1|NAPB|PNUTL4|SINT1|SeptD1	septin 9	protein-coding
MACS_peak_920	chr20	60972976	60973280	+	68.28	NA	intron (NM_031215, intron 1 of 9)	(TGG)n|Simple_repeat|Simple_repeat	9211	NM_031215	81928	Hs.301040	NM_031215	ENSG00000149679	CABLES2	C20orf150|dJ908M14.2|ik3-2	Cdk5 and Abl enzyme substrate 2	protein-coding
MACS_peak_900	chr20	57450422	57450899	+	68.25	NA	intron (NR_126334, intron 3 of 4)	intron (NR_126334, intron 3 of 4)	-12808	NR_132273	2778	Hs.125898	NM_000516	ENSG00000087460	GNAS	AHO|C20orf45|GNAS1|GPSA|GSA|GSP|NESP|POH|SCG6|SgVI	GNAS complex locus	protein-coding
MACS_peak_1477	chr9	136258017	136258244	+	68.19	NA	intron (NM_153710, intron 7 of 17)	AluYc|SINE|Alu	-13310	NM_001280788	6836	Hs.512465	NM_033161	ENSG00000148248	SURF4	ERV29	surfeit 4	protein-coding
MACS_peak_946	chr21	41757645	41757999	+	68.19	NA	TTS (NR_038896)	TTS (NR_038896)	2811	NR_038899	100506492	Hs.667053	NR_038896	ENSG00000235123	DSCAM-AS1	M41	DSCAM antisense RNA 1	ncRNA
MACS_peak_1063	chr3	196422191	196422403	+	68.16	NA	Intergenic	(CA)n|Simple_repeat|Simple_repeat	16868	NM_032898	84984	Hs.282800	NM_032898	ENSG00000174007	CEP19	C3orf34|MOSPGF	centrosomal protein 19kDa	protein-coding
MACS_peak_552	chr16	85379493	85379759	+	68.14	NA	Intergenic	(TGGA)n|Simple_repeat|Simple_repeat	-39695	NR_049816	100847022		NR_049816	ENSG00000266307	MIR5093	-	microRNA 5093	ncRNA
MACS_peak_17	chr1	11099342	11099558	+	68.13	NA	intron (NM_006610, intron 6 of 10)	(TGGA)n|Simple_repeat|Simple_repeat	7846	NM_006610	10747	Hs.655645	NM_006610	ENSG00000009724	MASP2	MAP19|MASP-2|MASP1P1|sMAP	mannan-binding lectin serine peptidase 2	protein-coding
MACS_peak_229	chr11	134310198	134310414	+	68.13	NA	intron (NR_033852, intron 1 of 5)	(TCCA)n|Simple_repeat|Simple_repeat	3930	NR_033852	283177	Hs.504390	NR_033852		LOC283177	-	uncharacterized LOC283177	ncRNA
MACS_peak_1516	chr9	141127030	141127291	+	68.12	NA	intron (NM_001145249, intron 6 of 6)	(TTAGGG)n|Simple_repeat|Simple_repeat	20523	NM_001145249	100132403	Hs.741123	NM_001145249		FAM157B	-	family with sequence similarity 157, member B	protein-coding
MACS_peak_1427	chr9	96423652	96423963	+	68.12	NA	intron (NM_005392, intron 12 of 21)	(TGGA)n|Simple_repeat|Simple_repeat	66684	NR_049853	100847045		NR_049853		MIR548AU	-	microRNA 548au	ncRNA
MACS_peak_1323	chr7	134032455	134032709	+	68.07	NA	Intergenic	(TGGA)n|Simple_repeat|Simple_repeat	-30755	NM_032826	84912	Hs.490181	NM_032826	ENSG00000205060	SLC35B4	YEA|YEA4	solute carrier family 35 (UDP-xylose/UDP-N-acetylglucosamine transporter), member B4	protein-coding
MACS_peak_580	chr16	88584848	88585083	+	67.92	NA	intron (NM_153813, intron 4 of 9)	(TGGA)n|Simple_repeat|Simple_repeat	49639	NR_049821	100847057		NR_049821	ENSG00000263456	MIR5189	mir-5189	microRNA 5189	ncRNA
MACS_peak_296	chr12	130383773	130384029	+	67.90	NA	intron (NM_133448, intron 1 of 8)	(TGGA)n|Simple_repeat|Simple_repeat	4311	NM_133448	121256	Hs.507268	NM_133448	ENSG00000151952	TMEM132D	MOLT|PPP1R153	transmembrane protein 132D	protein-coding
MACS_peak_718	chr19	45594682	45595162	+	67.82	NA	TTS (NM_001007269)	TTS (NM_001007269)	-1509	NM_019121	284352	Hs.285363	NM_019121	ENSG00000104866	PPP1R37	LRRC68	protein phosphatase 1, regulatory subunit 37	protein-coding
MACS_peak_1275	chr7	2530697	2530878	+	67.75	NA	Intergenic	(TCCA)n|Simple_repeat|Simple_repeat	-14770	NM_001291784	402635		NM_001291784		GRIFIN	-	galectin-related inter-fiber protein	protein-coding
MACS_peak_939	chr21	16582648	16582829	+	67.75	NA	Intergenic	Intergenic	-145612	NM_003489	8204	Hs.155017	NM_003489	ENSG00000180530	NRIP1	RIP140	nuclear receptor interacting protein 1	protein-coding
MACS_peak_922	chr20	61456981	61457246	+	67.71	NA	intron (NM_001853, intron 12 of 31)	intron (NM_001853, intron 12 of 31)	8699	NM_001853	1299	Hs.716639	NM_001853	ENSG00000092758	COL9A3	DJ885L7.4.1|EDM3|IDD|MED	collagen, type IX, alpha 3	protein-coding
MACS_peak_160	chr10	134989419	134989676	+	67.70	NA	intron (NM_152643, intron 3 of 29)	(TGGA)n|Simple_repeat|Simple_repeat	15576	NM_152643	85442	Hs.530685	NM_152643	ENSG00000171798	KNDC1	C10orf23|RASGEF2|bB439H18.3	kinase non-catalytic C-lobe domain (KIND) containing 1	protein-coding
MACS_peak_1196	chr5	177434030	177434287	+	67.67	NA	intron (NR_038353, intron 1 of 11)	(TTGGGG)n|Simple_repeat|Simple_repeat	191	NR_038353	653316	Hs.652193	NM_001079527	ENSG00000204677	FAM153C	NY-REN-7-like	family with sequence similarity 153, member C, pseudogene	pseudo
MACS_peak_1470	chr9	133394549	133394778	+	67.65	NA	Intergenic	Intergenic	60218	NR_027440	100272217	Hs.601255	NR_027440		LOC100272217	-	uncharacterized LOC100272217	ncRNA
MACS_peak_591	chr16	89894692	89894985	+	67.62	NA	promoter-TSS (NM_032451)	promoter-TSS (NM_032451)	-69	NM_032451	84501	Hs.461786	NM_032451	ENSG00000204991	SPIRE2	Spir-2	spire-type actin nucleation factor 2	protein-coding
MACS_peak_619	chr17	25263640	25265785	+	67.59	NA	Intergenic	(GAATG)n|Satellite|Satellite	356310	NR_039748	100616277		NR_039748	ENSG00000263583	MIR4522	-	microRNA 4522	ncRNA
MACS_peak_112	chr10	3296255	3296575	+	67.46	NA	Intergenic	(TCCA)n|Simple_repeat|Simple_repeat	-64472	NR_131187	105376360	Hs.212226	NR_131187		LOC105376360	-	uncharacterized LOC105376360	ncRNA
MACS_peak_926	chr20	62074114	62074405	+	67.37	NA	intron (NM_172106, intron 4 of 15)	(CCA)n|Simple_repeat|Simple_repeat	29734	NM_004518	3785	Hs.161851	NM_004518	ENSG00000075043	KCNQ2	BFNC|BFNS1|EBN|EBN1|EIEE7|ENB1|HNSPC|KCNA11|KV7.2|KVEBN1	potassium channel, voltage gated KQT-like subfamily Q, member 2	protein-coding
MACS_peak_918	chr20	60935119	60935409	+	67.32	NA	intron (NM_005560, intron 2 of 79)	intron (NM_005560, intron 2 of 79)	7104	NM_005560	3911	Hs.473256	NM_005560	ENSG00000130702	LAMA5	-	laminin, alpha 5	protein-coding
MACS_peak_92	chr1	245683775	245684034	+	67.30	NA	intron (NM_018012, intron 4 of 14)	(TCCA)n|Simple_repeat|Simple_repeat	365617	NM_018012	55083	Hs.143134	NM_018012	ENSG00000162849	KIF26B	-	kinesin family member 26B	protein-coding
MACS_peak_279	chr12	119145258	119145514	+	67.26	NA	Intergenic	(TGG)n|Simple_repeat|Simple_repeat	-273914	NM_194286	84530	Hs.744964	NM_194286	ENSG00000139767	SRRM4	KIAA1853|MU-MB-2.76|nSR100	serine/arginine repetitive matrix 4	protein-coding
MACS_peak_32	chr1	22557598	22557818	+	67.24	NA	Intergenic	(TCCA)n|Simple_repeat|Simple_repeat	-35024	NR_039613	100616433		NR_039613	ENSG00000266564	MIR4418	-	microRNA 4418	ncRNA
MACS_peak_1384	chr8	140884808	140885028	+	67.24	NA	intron (NM_031466, intron 21 of 22)	(TGGG)n|Simple_repeat|Simple_repeat	-169619	NM_001282534	51305	Hs.493037	NM_001282534	ENSG00000169427	KCNK9	K2p9.1|KT3.2|TASK-3|TASK3	potassium channel, two pore domain subfamily K, member 9	protein-coding
MACS_peak_950	chr21	42939183	42939433	+	67.20	NA	Intergenic	(TGGA)n|Simple_repeat|Simple_repeat	-59223	NM_005656	7113	Hs.439309	NM_005656	ENSG00000184012	TMPRSS2	PP9284|PRSS10	transmembrane protease, serine 2	protein-coding
MACS_peak_359	chr14	92513690	92513991	+	67.19	NA	Intergenic	HERVH-int|LTR|ERV1	-7437	NM_004239	9321	Hs.632339	NM_004239	ENSG00000100815	TRIP11	ACG1A|CEV14|GMAP-210|GMAP210|TRIP-11|TRIP230	thyroid hormone receptor interactor 11	protein-coding
MACS_peak_1081	chr4	3562490	3562750	+	67.10	NA	Intergenic	Intergenic	-15976	NR_040045	285492	Hs.145563	NM_173661		LINC00955	-	long intergenic non-protein coding RNA 955	ncRNA
MACS_peak_346	chr14	69262732	69263061	+	66.96	NA	promoter-TSS (NM_001244701)	promoter-TSS (NM_001244701)	64	NM_001244701	677	Hs.85155	NM_004926	ENSG00000185650	ZFP36L1	BRF1|Berg36|ERF-1|ERF1|RNF162B|TIS11B|cMG1	ZFP36 ring finger protein-like 1	protein-coding
MACS_peak_772	chr2	64602755	64602945	+	66.95	NA	Intergenic	(CCA)n|Simple_repeat|Simple_repeat	-34868	NR_106995	102465833		NR_106995	ENSG00000264297	MIR4433B	hsa-mir-4433b	microRNA 4433b	ncRNA
MACS_peak_1278	chr7	5438741	5438889	+	66.95	NA	intron (NM_001080495, intron 2 of 29)	intron (NM_001080495, intron 2 of 29)	24362	NM_001080495	84629	Hs.520638	NM_001013722	ENSG00000182095	TNRC18	CAGL79|TNRC18A	trinucleotide repeat containing 18	protein-coding
MACS_peak_983	chr22	37585276	37585480	+	66.95	NA	Intergenic	MER41B|LTR|ERV1	-1048	NM_031910	114904	Hs.22011	NM_031910	ENSG00000133466	C1QTNF6	CTFP6|CTRP6|ZACRP6	C1q and tumor necrosis factor related protein 6	protein-coding
MACS_peak_383	chr14	104767246	104767439	+	66.95	NA	Intergenic	(CCA)n|Simple_repeat|Simple_repeat	162282	NM_015656	26153	Hs.134970	NM_015656	ENSG00000066735	KIF26A	-	kinesin family member 26A	protein-coding
MACS_peak_97	chr10	874682	874894	+	66.95	NA	intron (NM_015155, intron 11 of 17)	intron (NM_015155, intron 11 of 17)	102857	NM_015155	23185	Hs.159069	NM_015155	ENSG00000107929	LARP4B	KIAA0217|LARP5	La ribonucleoprotein domain family, member 4B	protein-coding
MACS_peak_467	chr16	3601750	3601964	+	66.95	NA	intron (NM_178844, intron 11 of 20)	(CCCA)n|Simple_repeat|Simple_repeat	25548	NR_075083	197358	Hs.592091	NM_178844	ENSG00000167984	NLRC3	CLR16.2|NOD3	NLR family, CARD domain containing 3	protein-coding
MACS_peak_403	chr15	30241683	30241889	+	66.95	NA	intron (NM_001301025, intron 2 of 28)	(CCA)n|Simple_repeat|Simple_repeat	19216	NM_001301025	7082	Hs.743990	NM_003257	ENSG00000104067	TJP1	ZO-1	tight junction protein 1	protein-coding
MACS_peak_388	chr14	105606177	105606392	+	66.95	NA	Intergenic	Intergenic	10917	NR_106823	102465458		NR_106823	ENSG00000273778	MIR6765	hsa-mir-6765	microRNA 6765	ncRNA
MACS_peak_1412	chr9	5647820	5648005	+	66.95	NA	intron (NM_001135920, intron 1 of 21)	AluSx|SINE|Alu	18793	NM_001206557	57589	Hs.211520	NM_020829	ENSG00000107036	RIC1	CIP150|KIAA1432|bA207C16.1	RIC1 homolog, RAB6A GEF complex partner 1	protein-coding
MACS_peak_713	chr19	40315064	40315336	+	66.93	NA	TTS (NM_006484)	TTS (NM_006484)	5242	NR_106777	102465974		NR_106777	ENSG00000277759	MIR6719	hsa-mir-6719	microRNA 6719	ncRNA
MACS_peak_1006	chr3	46565166	46565427	+	66.90	NA	intron (NM_024512, intron 7 of 8)	(TCCA)n|Simple_repeat|Simple_repeat	25811	NM_031440	83597	Hs.196584	NM_031440		RTP3	LTM1|TMEM7|Z3CXXC3	receptor (chemosensory) transporter protein 3	protein-coding
MACS_peak_994	chr3	13517723	13517986	+	66.83	NA	TTS (NR_046690)	TTS (NR_046690)	3699	NR_046690	100874101	Hs.535701	NR_046690	ENSG00000244502	HDAC11-AS1	-	HDAC11 antisense RNA 1	ncRNA
MACS_peak_538	chr16	81767054	81767353	+	66.76	NA	Intergenic	(TCCA)n|Simple_repeat|Simple_repeat	-45660	NM_002661	5336	Hs.372303	NM_002661	ENSG00000197943	PLCG2	APLAID|FCAS3|PLC-IV|PLC-gamma-2	phospholipase C, gamma 2 (phosphatidylinositol-specific)	protein-coding
MACS_peak_1498	chr9	138196256	138196529	+	66.73	NA	Intergenic	(TGGA)n|Simple_repeat|Simple_repeat	-38703	NM_173520	157927	Hs.559511	NM_173520		C9orf62	-	chromosome 9 open reading frame 62	protein-coding
MACS_peak_550	chr16	85061033	85061322	+	66.68	NA	promoter-TSS (NM_001297766)	promoter-TSS (NM_001297766)	-180	NM_001286566	9764	Hs.301658	NM_014732	ENSG00000135709	KIAA0513	-	KIAA0513	protein-coding
MACS_peak_1292	chr7	76627098	76627420	+	66.55	NA	intron (NR_023383, intron 2 of 10)	(TG)n|Simple_repeat|Simple_repeat	17120	NR_023383	441263	Hs.675888	NR_023383	ENSG00000265479	DTX2P1-UPK3BP1-PMS2P11	PMS2L11|PMS2P11|PMSR6	DTX2P1-UPK3BP1-PMS2P11 readthrough transcribed pseudogene	pseudo
MACS_peak_1425	chr9	95793116	95793379	+	66.51	NA	intron (NM_001286993, intron 15 of 17)	(TGGA)n|Simple_repeat|Simple_repeat	-16021	NR_121565	101927954	Hs.673794	NR_121565		LOC101927954	-	uncharacterized LOC101927954	ncRNA
MACS_peak_852	chr20	41149504	41149895	+	66.48	NA	intron (NM_133170, intron 7 of 31)	(TCTA)n|Simple_repeat|Simple_repeat	-164424	NR_110004	101927159	Hs.570383	NR_110004	ENSG00000229042	LOC101927159	-	uncharacterized LOC101927159	ncRNA
MACS_peak_293	chr12	126585498	126585722	+	66.37	NA	intron (NR_110053, intron 3 of 4)	intron (NR_110053, intron 3 of 4)	5072	NR_110053	101927464	Hs.443932	NR_110053	ENSG00000256342	LOC101927464	-	uncharacterized LOC101927464	ncRNA
MACS_peak_1388	chr8	141561611	141561875	+	66.32	NA	intron (NM_001164623, intron 10 of 17)	(TGGG)n|Simple_repeat|Simple_repeat	39662	NR_040712	54108	Hs.279704	NM_017444	ENSG00000104472	CHRAC1	CHARC1|CHARC15|CHRAC-1|CHRAC-15|CHRAC15|YCL1	chromatin accessibility complex 1	protein-coding
MACS_peak_124	chr10	9228662	9229020	+	66.30	NA	Intergenic	Intergenic	-88735	NR_108039	100507163	Hs.649223	NR_108039		LINC00709	-	long intergenic non-protein coding RNA 709	ncRNA
MACS_peak_512	chr16	27411169	27411356	+	66.26	NA	Intergenic	Intergenic	-2221	NM_181079	50615	Hs.210546	NM_021798	ENSG00000103522	IL21R	CD360|NILR	interleukin 21 receptor	protein-coding
MACS_peak_1483	chr9	136798801	136799170	+	66.22	NA	intron (NM_003371, intron 2 of 26)	(TGGA)n|Simple_repeat|Simple_repeat	58461	NM_003371	7410	Hs.369921	NM_003371	ENSG00000160293	VAV2	VAV-2	vav 2 guanine nucleotide exchange factor	protein-coding
MACS_peak_1416	chr9	42825922	42826182	+	66.21	NA	Intergenic	ALR/Alpha|Satellite|centr	-32100	NR_026558	441432	Hs.743215	NR_026558		AQP7P3	AQPap-3	aquaporin 7 pseudogene 3	pseudo
MACS_peak_1248	chr6	167846317	167846638	+	66.21	NA	Intergenic	(TGG)n|Simple_repeat|Simple_repeat	-48479	NM_004610	6953	Hs.351	NM_004610		TCP10	TCP10A	t-complex 10	protein-coding
MACS_peak_1421	chr9	91986696	91987014	+	66.21	NA	intron (NM_001142287, intron 18 of 20)	(GTGTG)n|Simple_repeat|Simple_repeat	53089	NM_001282690	79048	Hs.59804	NM_024077	ENSG00000187742	SECISBP2	SBP2	SECIS binding protein 2	protein-coding
MACS_peak_1276	chr7	2530913	2531138	+	66.16	NA	Intergenic	(TCCA)n|Simple_repeat|Simple_repeat	-15008	NM_001291784	402635		NM_001291784		GRIFIN	-	galectin-related inter-fiber protein	protein-coding
MACS_peak_867	chr20	48128177	48128474	+	66.12	NA	intron (NM_000961, intron 8 of 9)	intron (NM_000961, intron 8 of 9)	-29144	NM_004975	3745	Hs.84244	NM_004975		KCNB1	DRK1|EIEE26|KV2.1|h-DRK1	potassium channel, voltage gated Shab related subfamily B, member 1	protein-coding
MACS_peak_1380	chr8	140708870	140709100	+	66.10	NA	intron (NR_104210, intron 1 of 3)	(TGGA)n|Simple_repeat|Simple_repeat	6314	NR_104210	51305	Hs.493037	NM_001282534	ENSG00000169427	KCNK9	K2p9.1|KT3.2|TASK-3|TASK3	potassium channel, two pore domain subfamily K, member 9	protein-coding
MACS_peak_1335	chr7	158153137	158153336	+	65.98	NA	intron (NM_130842, intron 1 of 21)	intron (NM_130842, intron 1 of 21)	172269	NR_030325	693180		NR_030325	ENSG00000207637	MIR595	MIRN595|hsa-mir-595	microRNA 595	ncRNA
MACS_peak_1078	chr4	2284883	2285109	+	65.94	NA	intron (NM_001172659, intron 8 of 12)	(TCCA)n|Simple_repeat|Simple_repeat	-21257	NM_006454	10608	Hs.655020	NM_006454	ENSG00000123933	MXD4	MAD4|MST149|MSTP149|bHLHc12	MAX dimerization protein 4	protein-coding
MACS_peak_839	chr20	965612	965838	+	65.94	NA	intron (NM_001040007, intron 1 of 3)	(TCCA)n|Simple_repeat|Simple_repeat	17182	NM_001040007	343637	Hs.444980	NM_001029871	ENSG00000101282	RSPO4	C20orf182|CRISTIN4	R-spondin 4	protein-coding
MACS_peak_525	chr16	33293783	33294474	+	65.92	NA	Intergenic	(GCTG)n|Simple_repeat|Simple_repeat	4574	NR_033866	390705	Hs.278513	NR_033866		LOC390705	-	protein phosphatase 2, regulatory subunit B'', beta pseudogene	pseudo
MACS_peak_1218	chr6	15222171	15222426	+	65.84	NA	Intergenic	Intergenic	-23908	NM_004973	3720	Hs.269059	NM_004973	ENSG00000008083	JARID2	JMJ	jumonji, AT rich interactive domain 2	protein-coding
MACS_peak_985	chr22	50495683	50495872	+	65.80	NA	Intergenic	(TTGGGG)n|Simple_repeat|Simple_repeat	28004	NM_139202	23209	Hs.517729	NM_015166	ENSG00000100427	MLC1	LVM|MLC|VL	megalencephalic leukoencephalopathy with subcortical cysts 1	protein-coding
MACS_peak_1167	chr5	167743430	167743619	+	65.80	NA	intron (NM_015238, intron 1 of 22)	intron (NM_015238, intron 1 of 22)	24459	NM_001161662	23286	Hs.484047	NM_015238	ENSG00000113645	WWC1	HBEBP3|HBEBP36|KIBRA|MEMRYQTL|PPP1R168	WW and C2 domain containing 1	protein-coding
MACS_peak_1312	chr7	101828506	101828724	+	65.79	NA	intron (NM_181500, intron 11 of 22)	MIRb|SINE|MIR	-99738	NM_020979	10603	Hs.489448	NM_020979	ENSG00000160999	SH2B2	APS	SH2B adaptor protein 2	protein-coding
MACS_peak_307	chr12	132052876	132053103	+	65.73	NA	Intergenic	(TCCA)n|Simple_repeat|Simple_repeat	-142643	NM_004592	6433	Hs.308171	NM_004592	ENSG00000061936	SFSWAP	SFRS8|SWAP	splicing factor, suppressor of white-apricot family	protein-coding
MACS_peak_1212	chr6	3222295	3222522	+	65.73	NA	Intergenic	(CCA)n|Simple_repeat|Simple_repeat	5560	NM_178012	347733	Hs.300701	NM_178012	ENSG00000137285	TUBB2B	PMGYSA|bA506K6.1	tubulin, beta 2B class IIb	protein-coding
MACS_peak_657	chr17	76536649	76536959	+	65.60	NA	intron (NM_173628, intron 17 of 80)	(TGGA)n|Simple_repeat|Simple_repeat	36672	NM_173628	8632	Hs.375975	NM_003727	ENSG00000187775	DNAH17	DNAHL1|DNEL2	dynein, axonemal, heavy chain 17	protein-coding
MACS_peak_447	chr15	101670734	101671227	+	65.55	NA	Intergenic	L1MB3|LINE|L1	121157	NM_014918	22856	Hs.110488	NM_014918	ENSG00000131873	CHSY1	CHSY|CSS1|ChSy-1|TPBS	chondroitin sulfate synthase 1	protein-coding
MACS_peak_478	chr16	6157482	6157710	+	65.52	NA	intron (NM_001142333, intron 1 of 14)	intron (NM_001142333, intron 1 of 14)	87892	NM_001308117	54715	Hs.459842	NM_018723	ENSG00000078328	RBFOX1	2BP1|A2BP1|FOX-1|FOX1|HRNBP1	RNA binding protein, fox-1 homolog (C. elegans) 1	protein-coding
MACS_peak_601	chr17	9317217	9317372	+	65.49	NA	intron (NR_033656, intron 4 of 5)	(TCCA)n|Simple_repeat|Simple_repeat	161981	NM_004853	9482	Hs.431109	NM_004853	ENSG00000170310	STX8	CARB	syntaxin 8	protein-coding
MACS_peak_1314	chr7	102230361	102230704	+	65.36	NA	intron (NM_001277335, intron 16 of 19)	intron (NM_001277335, intron 16 of 19)	-17464	NM_001097615	548644	Hs.610255	NM_001015884	ENSG00000168255	POLR2J3	POLR2J2|RPB11b1|RPB11b2	polymerase (RNA) II (DNA directed) polypeptide J3	protein-coding
MACS_peak_1014	chr3	69424172	69424392	+	65.32	NA	intron (NM_015123, intron 1 of 22)	(TCCA)n|Simple_repeat|Simple_repeat	11173	NM_015123	23150	Hs.371681	NM_015123	ENSG00000114541	FRMD4B	6030440G05Rik|GRSP1	FERM domain containing 4B	protein-coding
MACS_peak_776	chr2	74704587	74704807	+	65.32	NA	intron (NM_032779, intron 5 of 8)	intron (NM_032779, intron 5 of 8)	-4755	NM_053050	116540	Hs.534527	NM_053050		MRPL53	L53MT	mitochondrial ribosomal protein L53	protein-coding
MACS_peak_96	chr10	790241	790432	+	65.30	NA	Intergenic	(GGCTG)n|Simple_repeat|Simple_repeat	-54728	NM_014974	22982	Hs.432397	NM_014974	ENSG00000151240	DIP2C	KIAA0934	disco-interacting protein 2 homolog C	protein-coding
MACS_peak_890	chr20	56235611	56236133	+	65.19	NA	intron (NM_199171, intron 1 of 3)	intron (NM_199171, intron 1 of 3)	29808	NM_001255976	56937	Hs.517155	NM_020182	ENSG00000124225	PMEPA1	STAG1|TMEPAI	prostate transmembrane protein, androgen induced 1	protein-coding
MACS_peak_369	chr14	97737239	97737509	+	65.17	NA	Intergenic	(TCCA)n|Simple_repeat|Simple_repeat	-187779	NR_110165	101929241	Hs.650839	NR_110165	ENSG00000246084	LOC101929241	-	uncharacterized LOC101929241	ncRNA
MACS_peak_1124	chr5	2160572	2160842	+	65.17	NA	Intergenic	Intergenic	151608	NR_104616	100506858	Hs.445071	NR_104616		LOC100506858	-	uncharacterized LOC100506858	ncRNA
MACS_peak_656	chr17	76119599	76119869	+	65.17	NA	intron (NM_001127198, intron 9 of 19)	(TGGG)n|Simple_repeat|Simple_repeat	5127	NM_001127198	11322	Hs.632227	NM_007267	ENSG00000141524	TMC6	EV1|EVER1|EVIN1|LAK-4P	transmembrane channel like 6	protein-coding
MACS_peak_379	chr14	103600801	103601071	+	65.17	NA	intron (NM_006291, intron 10 of 10)	(CCCA)n|Simple_repeat|Simple_repeat	8272	NM_006291	7127	Hs.525607	NM_006291	ENSG00000185215	TNFAIP2	B94|EXOC3L3	tumor necrosis factor, alpha-induced protein 2	protein-coding
MACS_peak_1083	chr4	3611787	3612017	+	65.10	NA	Intergenic	(TCCA)n|Simple_repeat|Simple_repeat	33306	NR_040045	285492	Hs.145563	NM_173661		LINC00955	-	long intergenic non-protein coding RNA 955	ncRNA
MACS_peak_1405	chr8	144897891	144898069	+	65.09	NA	promoter-TSS (NM_015356)	promoter-TSS (NM_015356)	-431	NM_182706	23513	Hs.436329	NM_015356	ENSG00000180900	SCRIB	CRIB1|SCRB1|SCRIB1|Vartul	scribbled planar cell polarity protein	protein-coding
MACS_peak_203	chr11	70623533	70623767	+	65.05	NA	intron (NM_012309, intron 11 of 22)	L2a|LINE|L2	-85245	NR_073536	220070	Hs.326766	NM_145308	ENSG00000171671	SHANK2-AS3	C11orf76	SHANK2 antisense RNA 3	ncRNA
MACS_peak_568	chr16	88197639	88197844	+	65.04	NA	Intergenic	(TGGA)n|Simple_repeat|Simple_repeat	-30146	NR_110944	101928880	Hs.634835	NR_110944	ENSG00000260420	LOC101928880	LA16c-444G7.2	uncharacterized LOC101928880	ncRNA
MACS_peak_1197	chr5	177531351	177531754	+	64.85	NA	Intergenic	Intergenic	-9004	NM_015111	23138	Hs.101761	NM_015111	ENSG00000145911	N4BP3	LZTS4	NEDD4 binding protein 3	protein-coding
MACS_peak_1129	chr5	3276223	3276539	+	64.79	NA	Intergenic	G-rich|Low_complexity|Low_complexity	98432	NR_104617	102467074	Hs.575250	NR_104617	ENSG00000249808	LINC01377	-	long intergenic non-protein coding RNA 1377	ncRNA
MACS_peak_1054	chr3	194664021	194664349	+	64.79	NA	Intergenic	CT-rich|Low_complexity|Low_complexity	-151132	NR_104188	100874528	Hs.581659	NR_104188	ENSG00000233303	XXYLT1-AS1	-	XXYLT1 antisense RNA 1	ncRNA
MACS_peak_79	chr1	203469116	203469422	+	64.79	NA	intron (NM_014359, intron 5 of 7)	(CCA)n|Simple_repeat|Simple_repeat	5998	NM_014359	26254	Hs.632468	NM_014359	ENSG00000188770	OPTC	OPT	opticin	protein-coding
MACS_peak_1071	chr4	548835	549066	+	64.79	NA	Intergenic	(CA)n|Simple_repeat|Simple_repeat	55961	NR_110293	54872	Hs.7099	NM_017733	ENSG00000174227	PIGG	GPI7|LAS21|PRO4405|RLGS1930	phosphatidylinositol glycan anchor biosynthesis class G	protein-coding
MACS_peak_230	chr12	74160	74438	+	64.70	NA	intron (NR_130745, intron 1 of 10)	CpG	574	NR_130745	100288778	Hs.459573	NR_130745	ENSG00000226210	LOC100288778	-	WAS protein family homolog 1 pseudogene	pseudo
MACS_peak_1027	chr3	124259758	124259990	+	64.69	NA	intron (NM_001024660, intron 33 of 59)	intron (NM_001024660, intron 33 of 59)	-43632	NM_007064	8997	Hs.8004	NM_003947	ENSG00000160145	KALRN	ARHGEF24|CHD5|CHDS5|DUET|DUO|HAPIP|TRAD	kalirin, RhoGEF kinase	protein-coding
MACS_peak_1143	chr5	64543553	64543785	+	64.69	NA	intron (NM_197941, intron 14 of 24)	intron (NM_197941, intron 14 of 24)	234035	NM_197941	11174	Hs.482291	NM_197941	ENSG00000049192	ADAMTS6	ADAM-TS 6|ADAM-TS6|ADAMTS-6	ADAM metallopeptidase with thrombospondin type 1 motif 6	protein-coding
MACS_peak_396	chr15	20305750	20306620	+	64.60	NA	Intergenic	(GCTG)n|Simple_repeat|Simple_repeat	-181812	NR_038836	646096	Hs.448789	NR_038836	ENSG00000259156	CHEK2P2	-	checkpoint kinase 2 pseudogene 2	pseudo
MACS_peak_1463	chr9	132218832	132219154	+	64.55	NA	Intergenic	(TGGA)n|Simple_repeat|Simple_repeat	-31946	NR_038955	100506190	Hs.529860	NR_038955		LINC00963	-	long intergenic non-protein coding RNA 963	ncRNA
MACS_peak_1414	chr9	19380164	19380397	+	64.48	NA	promoter-TSS (NM_001010)	promoter-TSS (NM_001010)	-45	NM_001010	6194	Hs.408073	NM_001010	ENSG00000137154	RPS6	S6	ribosomal protein S6	protein-coding
MACS_peak_673	chr18	10008426	10008659	+	64.48	NA	Intergenic	(CCCA)n|Simple_repeat|Simple_repeat	94587	NM_003574	9218	Hs.165195	NM_003574	ENSG00000101558	VAPA	VAP-33|VAP-A|VAP33|hVAP-33	VAMP associated protein A	protein-coding
MACS_peak_3	chr1	912536	912810	+	64.43	NA	intron (NM_001291367, intron 3 of 4)	intron (NM_001291367, intron 3 of 4)	4824	NM_001291366	84808	Hs.271462	NM_032722	ENSG00000187642	PERM1	C1orf170	PPARGC1 and ESRR induced regulator, muscle 1	protein-coding
MACS_peak_1527	chrX	40377495	40377654	+	64.42	NA	Intergenic	LTR47B|LTR|ERVL	-62642	NM_005765	10159	Hs.495960	NM_005765	ENSG00000182220	ATP6AP2	APT6M8-9|ATP6IP2|ATP6M8-9|ELDF10|HT028|M8-9|MRXE|MRXSH|MSTP009|PRR|RENR|XMRE|XPDS	ATPase, H+ transporting, lysosomal accessory protein 2	protein-coding
MACS_peak_320	chr12	132876751	132877025	+	64.31	NA	intron (NM_001122636, intron 1 of 10)	intron (NM_001122636, intron 1 of 10)	24911	NR_024563	100130238	Hs.536338	NR_024563		LOC100130238	-	uncharacterized LOC100130238	ncRNA
MACS_peak_1142	chr5	57755753	57755938	+	64.29	NA	5' UTR (NM_006622, exon 1 of 14)	5' UTR (NM_006622, exon 1 of 14)	121	NM_006622	10769	Hs.398157	NM_006622	ENSG00000145632	PLK2	SNK|hPlk2|hSNK	polo-like kinase 2	protein-coding
MACS_peak_420	chr15	74098185	74098419	+	64.28	NA	Intergenic	Intergenic	37747	NR_120352	101929221		NR_120352		C15orf59-AS1	-	C15orf59 antisense RNA 1	ncRNA
MACS_peak_670	chr18	63577	63900	+	64.26	NA	Intergenic	(CCCTAA)n|Simple_repeat|Simple_repeat	-45327	NR_033770	727758	Hs.585843	NR_033770	ENSG00000263006	ROCK1P1	-	Rho-associated, coiled-coil containing protein kinase 1 pseudogene 1	pseudo
MACS_peak_190	chr11	69010715	69011050	+	64.26	NA	Intergenic	(TCCA)n|Simple_repeat|Simple_repeat	-50723	NM_001300923	26579	Hs.523848	NM_138768	ENSG00000172927	MYEOV	OCIM	myeloma overexpressed	protein-coding
MACS_peak_730	chr19	51313204	51313553	+	64.26	NA	Intergenic	(TTGGGG)n|Simple_repeat|Simple_repeat	-5268	NM_001290155	84798	Hs.256301	NM_032712	ENSG00000167747	C19orf48	-	chromosome 19 open reading frame 48	protein-coding
MACS_peak_1009	chr3	57541741	57542017	+	64.06	NA	promoter-TSS (NM_177966)	promoter-TSS (NM_177966)	-102	NM_177966	201626	Hs.572993	NM_177966		PDE12	2'-PDE	phosphodiesterase 12	protein-coding
MACS_peak_911	chr20	60465270	60465585	+	64.05	NA	intron (NM_001794, intron 7 of 15)	(TGGA)n|Simple_repeat|Simple_repeat	63291	NR_031658	100302168		NR_031658	ENSG00000221417	MIR1257	MIRN1257|hsa-mir-1257	microRNA 1257	ncRNA
MACS_peak_424	chr15	78400739	78400967	+	63.92	NA	intron (NR_125435, intron 3 of 4)	intron (NR_125435, intron 3 of 4)	15926	NM_001101404	646892	Hs.569511	NM_001101404		SH2D7	-	SH2 domain containing 7	protein-coding
MACS_peak_100	chr10	1456961	1457197	+	63.87	NA	intron (NM_018702, intron 1 of 9)	(TGGA)n|Simple_repeat|Simple_repeat	-111746	NR_033387	642394	Hs.568831	NM_001098830	ENSG00000205696	ADARB2-AS1	C10orf109|NCRNA00168|bA466B20.1	ADARB2 antisense RNA 1	ncRNA
MACS_peak_854	chr20	42988865	42989101	+	63.85	NA	intron (NM_175914, intron 1 of 9)	(TGGA)n|Simple_repeat|Simple_repeat	4542	NM_001030003	3172	Hs.116462	NM_000457	ENSG00000101076	HNF4A	FRTS4|HNF4|HNF4a7|HNF4a8|HNF4a9|HNF4alpha|MODY|MODY1|NR2A1|NR2A21|TCF|TCF14	hepatocyte nuclear factor 4, alpha	protein-coding
MACS_peak_393	chr14	106131862	106132115	+	63.76	NA	Intergenic	Intergenic	7156	NR_046211	2003	Hs.744419	NR_046211		ELK2AP	ELK2|ELK2.1|ELK2P1	ELK2A, member of ETS oncogene family, pseudogene	pseudo
MACS_peak_418	chr15	74001456	74001690	+	63.72	NA	intron (NM_025240, intron 5 of 7)	(TGGG)n|Simple_repeat|Simple_repeat	24951	NM_001024736	80381	Hs.744915	NM_025240	ENSG00000103855	CD276	4Ig-B7-H3|B7-H3|B7H3|B7RP-2	CD276 molecule	protein-coding
MACS_peak_29	chr1	20071583	20071781	+	63.71	NA	intron (NM_181719, intron 10 of 15)	intron (NM_181719, intron 10 of 15)	54728	NM_181719	255104	Hs.656313	NM_181719	ENSG00000162542	TMCO4	-	transmembrane and coiled-coil domains 4	protein-coding
MACS_peak_704	chr19	32576134	32576332	+	63.71	NA	Intergenic	(TGGA)n|Simple_repeat|Simple_repeat	20589	NR_110694	101927411	Hs.515337	NR_110694	ENSG00000267204	LOC101927411	-	uncharacterized LOC101927411	ncRNA
MACS_peak_1272	chr7	1670263	1670541	+	63.67	NA	Intergenic	(TCCA)n|Simple_repeat|Simple_repeat	16296	NR_001288	260341	Hs.534596	NR_001288		TFAMP1	MTTF1|TCF6L1	transcription factor A, mitochondrial pseudogene 1	pseudo
MACS_peak_113	chr10	3598456	3598770	+	63.66	NA	intron (NR_131187, intron 1 of 1)	CpG	228860	NM_001300	1316	Hs.4055	NM_001300	ENSG00000067082	KLF6	BCD1|CBA1|COPEB|CPBP|GBF|PAC1|ST12|ZF9	Kruppel-like factor 6	protein-coding
MACS_peak_58	chr1	143187474	143187701	+	63.62	NA	intron (NR_110761, intron 2 of 2)	HSAT5|Satellite|Satellite	14652	NR_110761	102723769	Hs.652926	NR_110761		LOC102723769	-	uncharacterized LOC102723769	ncRNA
MACS_peak_986	chr3	9150264	9150458	+	63.61	NA	intron (NM_014850, intron 2 of 21)	intron (NM_014850, intron 2 of 21)	-83816	NR_121664	101927416	Hs.475364	NR_121663	ENSG00000228723	LOC101927416	-	uncharacterized LOC101927416	ncRNA
MACS_peak_1526	chrX	34705278	34705477	+	63.48	NA	Intergenic	L1MA1|LINE|L1	-29972	NM_031442	83604	Hs.8769	NM_031442	ENSG00000147027	TMEM47	BCMP1|TM4SF10	transmembrane protein 47	protein-coding
MACS_peak_655	chr17	75881136	75881374	+	63.47	NA	Intergenic	Intergenic	-1086	NR_028337	400624	Hs.514521	NM_001001685	ENSG00000204283	FLJ45079	-	FLJ45079 protein	ncRNA
MACS_peak_395	chr14	106171834	106172238	+	63.43	NA	Intergenic	(TCCA)n|Simple_repeat|Simple_repeat	-32892	NR_046211	2003	Hs.744419	NR_046211		ELK2AP	ELK2|ELK2.1|ELK2P1	ELK2A, member of ETS oncogene family, pseudogene	pseudo
MACS_peak_805	chr2	133968602	133968750	+	63.39	NA	intron (NR_107007, intron 4 of 6)	L2a|LINE|L2	-55091	NR_110294	101928161	Hs.661917	NR_110294	ENSG00000226953	LOC101928161	-	uncharacterized LOC101928161	ncRNA
MACS_peak_658	chr17	77116468	77116683	+	63.25	NA	intron (NM_001082575, intron 4 of 14)	(TGGA)n|Simple_repeat|Simple_repeat	45556	NM_001042573	64772	Hs.29288	NM_022759		ENGASE	-	endo-beta-N-acetylglucosaminidase	protein-coding
MACS_peak_430	chr15	86296451	86296649	+	63.19	NA	Intergenic	Intergenic	5406	NR_120366	101929679	Hs.513112	NR_120366		LOC101929679	-	uncharacterized LOC101929679	ncRNA
MACS_peak_1369	chr8	123639268	123639558	+	63.18	NA	Intergenic	Intergenic	-58530	NR_131202	105375734	Hs.628341	NR_131202	ENSG00000255364	LOC105375734	-	uncharacterized LOC105375734	ncRNA
MACS_peak_1356	chr8	95653005	95653171	+	63.12	NA	promoter-TSS (NM_001122825)	promoter-TSS (NM_001122825)	-276	NM_017697	54845	Hs.487471	NM_017697	ENSG00000104413	ESRP1	RBM35A|RMB35A	epithelial splicing regulatory protein 1	protein-coding
MACS_peak_130	chr10	28966390	28966608	+	63.07	NA	promoter-TSS (NM_012342)	promoter-TSS (NM_012342)	75	NM_012342	25805	Hs.533336	NM_012342	ENSG00000095739	BAMBI	NMA	BMP and activin membrane-bound inhibitor	protein-coding
MACS_peak_1385	chr8	140885175	140885376	+	63.03	NA	intron (NM_031466, intron 21 of 22)	(TGGG)n|Simple_repeat|Simple_repeat	-169976	NM_001282534	51305	Hs.493037	NM_001282534	ENSG00000169427	KCNK9	K2p9.1|KT3.2|TASK-3|TASK3	potassium channel, two pore domain subfamily K, member 9	protein-coding
MACS_peak_909	chr20	60246847	60247140	+	62.94	NA	intron (NM_001252339, intron 1 of 14)	(TGGA)n|Simple_repeat|Simple_repeat	72176	NM_001252339	1002	Hs.473231	NM_001794	ENSG00000179242	CDH4	CAD4|R-CAD|RCAD	cadherin 4, type 1, R-cadherin (retinal)	protein-coding
MACS_peak_1372	chr8	125262490	125262834	+	62.91	NA	Intergenic	(TCCA)n|Simple_repeat|Simple_repeat	-3023	NR_125420	101927588	Hs.617072	NR_125420	ENSG00000214803	LOC101927588	-	uncharacterized LOC101927588	ncRNA
MACS_peak_38	chr1	38100759	38101000	+	62.87	NA	promoter-TSS (NM_001038633)	promoter-TSS (NM_001038633)	-284	NM_001038633	284654	Hs.135015	NM_173640	ENSG00000169218	RSPO1	CRISTIN3|RSPO	R-spondin 1	protein-coding
MACS_peak_178	chr11	63777408	63777573	+	62.87	NA	intron (NM_014067, intron 4 of 10)	(TTGG)n|Simple_repeat|Simple_repeat	24165	NM_017670	55611	Hs.473788	NM_017670	ENSG00000167770	OTUB1	HSPC263|OTB1|OTU1	OTU deubiquitinase, ubiquitin aldehyde binding 1	protein-coding
MACS_peak_1396	chr8	143577082	143577247	+	62.86	NA	intron (NM_001702, intron 16 of 29)	MLT1C|LTR|ERVL-MaLR	31787	NM_001702	575	Hs.194654	NM_001702	ENSG00000181790	ADGRB1	BAI1|GDAIF	adhesion G protein-coupled receptor B1	protein-coding
MACS_peak_667	chr17	81017277	81017607	+	62.82	NA	Intergenic	Intergenic	-7756	NM_001009905	146712	Hs.607824	NM_001009905	ENSG00000175711	B3GNTL1	B3GNT8	UDP-GlcNAc:betaGal beta-1,3-N-acetylglucosaminyltransferase-like 1	protein-coding
MACS_peak_31	chr1	21771279	21771481	+	62.81	NA	intron (NM_001256416, intron 1 of 14)	L2a|LINE|L2	4797	NM_001256416	84224	Hs.325422	NM_032264	ENSG00000142794	NBPF3	AE2	neuroblastoma breakpoint family, member 3	protein-coding
MACS_peak_131	chr10	30502036	30502238	+	62.81	NA	intron (NR_120653, intron 1 of 2)	intron (NR_120653, intron 1 of 2)	1356	NR_120653	101929279	Hs.559153	NR_120653		LOC101929279	-	uncharacterized LOC101929279	ncRNA
MACS_peak_975	chr22	25883097	25883299	+	62.81	NA	Intergenic	(TGGA)n|Simple_repeat|Simple_repeat	31585	NR_106875	102466198		NR_106875	ENSG00000277872	MIR6817	hsa-mir-6817	microRNA 6817	ncRNA
MACS_peak_1132	chr5	11169095	11169462	+	62.80	NA	intron (NM_001288715, intron 10 of 20)	MER110|LTR|ERV1	-407891	NM_001291963	1611	Hs.75189	NM_004394	ENSG00000112977	DAP	-	death-associated protein	protein-coding
MACS_peak_766	chr2	45978813	45979005	+	62.79	NA	intron (NM_005400, intron 1 of 14)	intron (NM_005400, intron 1 of 14)	99866	NM_005400	5581	Hs.580351	NM_005400	ENSG00000171132	PRKCE	PKCE|nPKC-epsilon	protein kinase C, epsilon	protein-coding
MACS_peak_474	chr16	5305387	5305670	+	62.79	NA	Intergenic	(TCCA)n|Simple_repeat|Simple_repeat	-157707	NM_001289029	196483	Hs.406461	NM_201400	ENSG00000118894	EEF2KMT	FAM86A|SB153|eEF2-KMT	eukaryotic elongation factor 2 lysine methyltransferase	protein-coding
MACS_peak_896	chr20	56780380	56781020	+	62.65	NA	Intergenic	CpG	23009	NM_001304369	140731	Hs.266571	NM_080674		ANKRD60	C20orf86|bA196N14.3	ankyrin repeat domain 60	protein-coding
MACS_peak_620	chr17	25265799	25267213	+	62.60	NA	Intergenic	(GAGTG)n|Simple_repeat|Simple_repeat	354516	NR_039748	100616277		NR_039748	ENSG00000263583	MIR4522	-	microRNA 4522	ncRNA
MACS_peak_309	chr12	132111163	132111366	+	62.57	NA	Intergenic	C-rich|Low_complexity|Low_complexity	-84368	NM_004592	6433	Hs.308171	NM_004592	ENSG00000061936	SFSWAP	SFRS8|SWAP	splicing factor, suppressor of white-apricot family	protein-coding
MACS_peak_1286	chr7	57548315	57548771	+	62.48	NA	Intergenic	(GAATG)n|Satellite|Satellite	38660	NM_001159279	441234	Hs.533121	NM_001159279	ENSG00000182111	ZNF716	-	zinc finger protein 716	protein-coding
MACS_peak_788	chr2	109518475	109518642	+	62.37	NA	intron (NM_022336, intron 11 of 11)	AluSg|SINE|Alu	87270	NM_022336	10913	Hs.171971	NM_022336	ENSG00000135960	EDAR	DL|ECTD10A|ECTD10B|ED1R|ED3|ED5|EDA-A1R|EDA1R|EDA3|HRM1	ectodysplasin A receptor	protein-coding
MACS_peak_527	chr16	57740029	57740196	+	62.37	NA	intron (NM_001289162, intron 7 of 18)	(TCCA)n|Simple_repeat|Simple_repeat	11399	NM_001289162	84229	Hs.513635	NM_032269	ENSG00000159625	DRC7	C16orf50|CCDC135|CFAP50|FAP50	dynein regulatory complex subunit 7	protein-coding
MACS_peak_509	chr16	26384944	26385191	+	62.30	NA	Intergenic	L2|LINE|L2	681720	NM_006040	9951	Hs.655275	NM_006040	ENSG00000182601	HS3ST4	3-OST-4|30ST4|3OST4|h3-OST-4	heparan sulfate (glucosamine) 3-O-sulfotransferase 4	protein-coding
MACS_peak_1432	chr9	99060782	99061036	+	62.20	NA	intron (NM_000197, intron 1 of 10)	intron (NM_000197, intron 1 of 10)	3525	NM_000197	3293	Hs.477	NM_000197	ENSG00000130948	HSD17B3	EDH17B3|SDR12C2	hydroxysteroid (17-beta) dehydrogenase 3	protein-coding
MACS_peak_565	chr16	88086225	88086525	+	62.10	NA	intron (NM_017869, intron 10 of 11)	HAL1-2a_MD|LINE|L1	48216	NR_120310	400553	Hs.592071	NR_120310	ENSG00000205037	LOC400553	-	uncharacterized LOC400553	ncRNA
MACS_peak_1145	chr5	69206888	69207089	+	62.00	NA	Intergenic	AluSz|SINE|Alu	-114084	NM_022968	8293	Hs.726820	NM_021967	ENSG00000172058	SERF1A	4F5|FAM2A|H4F5|SERF1|SMAM1	small EDRK-rich factor 1A (telomeric)	protein-coding
MACS_peak_282	chr12	120783085	120783449	+	61.97	NA	intron (NM_002442, intron 14 of 14)	L2a|LINE|L2	-17675	NM_000928	5319	Hs.992	NM_000928	ENSG00000170890	PLA2G1B	PLA2|PLA2A|PPLA2	phospholipase A2, group IB (pancreas)	protein-coding
MACS_peak_1401	chr8	143883054	143883260	+	61.94	NA	Intergenic	(TGGG)n|Simple_repeat|Simple_repeat	-15149	NM_003695	8581	Hs.415762	NM_003695	ENSG00000167656	LY6D	E48|Ly-6D	lymphocyte antigen 6 complex, locus D	protein-coding
MACS_peak_301	chr12	131584978	131585224	+	61.89	NA	intron (NM_198827, intron 15 of 24)	(TTGG)n|Simple_repeat|Simple_repeat	-64455	NR_026670	116437	Hs.675497	NR_026670	ENSG00000204603	LINC01257	-	long intergenic non-protein coding RNA 1257	ncRNA
MACS_peak_1225	chr6	44140550	44140796	+	61.89	NA	intron (NM_007058, intron 5 of 22)	intron (NM_007058, intron 5 of 22)	14125	NM_007058	11131	Hs.225953	NM_007058	ENSG00000137225	CAPN11	calpain11	calpain 11	protein-coding
MACS_peak_180	chr11	64362511	64362680	+	61.88	NA	intron (NM_144585, intron 4 of 9)	(TGGA)n|Simple_repeat|Simple_repeat	4313	NM_001276327	116085	Hs.174424	NM_144585	ENSG00000197891	SLC22A12	OAT4L|RST|URAT1	solute carrier family 22 (organic anion/urate transporter), member 12	protein-coding
MACS_peak_1320	chr7	130859610	130859859	+	61.87	NA	intron (NM_001145354, intron 2 of 18)	(TAGA)n|Simple_repeat|Simple_repeat	64879	NM_001145354	4289	Hs.44693	NM_013255	ENSG00000128585	MKLN1	TWA2	muskelin 1, intracellular mediator containing kelch motifs	protein-coding
MACS_peak_740	chr2	10189	10428	+	61.87	NA	Intergenic	(CCCTAA)n|Simple_repeat|Simple_repeat	36280	NM_001077710	642273	Hs.8379	NM_001077710	ENSG00000184731	FAM110C	-	family with sequence similarity 110, member C	protein-coding
MACS_peak_1208	chr6	834235	834525	+	61.87	NA	Intergenic	(TTCC)n|Simple_repeat|Simple_repeat	-34118	NR_110853	101927691	Hs.552556	NR_110853		LOC101927691	-	uncharacterized LOC101927691	ncRNA
MACS_peak_523	chr16	31107150	31107421	+	61.87	NA	promoter-TSS (NM_001311311)	promoter-TSS (NM_001311311)	-965	NM_024006	79001	Hs.324844	NM_024006	ENSG00000167397	VKORC1	EDTP308|MST134|MST576|VKCFD2|VKOR	vitamin K epoxide reductase complex subunit 1	protein-coding
MACS_peak_1354	chr8	88165898	88166261	+	61.82	NA	intron (NM_173538, intron 4 of 10)	intron (NM_173538, intron 4 of 10)	287403	NM_173538	168975	Hs.246284	NM_173538	ENSG00000176571	CNBD1	-	cyclic nucleotide binding domain containing 1	protein-coding
MACS_peak_980	chr22	29515989	29516554	+	61.73	NA	intron (NM_032045, intron 3 of 9)	GA-rich|Low_complexity|Low_complexity	47205	NM_001039570	83999	Hs.229335	NM_032045	ENSG00000183762	KREMEN1	KREMEN|KRM1	kringle containing transmembrane protein 1	protein-coding
MACS_peak_9	chr1	3287948	3288155	+	61.72	NA	intron (NM_022114, intron 3 of 16)	(TCCA)n|Simple_repeat|Simple_repeat	-83096	NM_014448	27237	Hs.87435	NM_014448	ENSG00000130762	ARHGEF16	GEF16|NBR	Rho guanine nucleotide exchange factor 16	protein-coding
MACS_peak_699	chr19	30381574	30381821	+	61.70	NA	Intergenic	(TCCA)n|Simple_repeat|Simple_repeat	-32854	NM_001252641	8725	Hs.466391	NM_003796	ENSG00000105176	URI1	C19orf2|NNX3|PPP1R19|RMP|URI	URI1, prefoldin-like chaperone	protein-coding
MACS_peak_1203	chr5	180062726	180062973	+	61.70	NA	intron (NM_182925, intron 1 of 29)	(TGGA)n|Simple_repeat|Simple_repeat	13775	NM_002020	2324	Hs.646917	NM_002020	ENSG00000037280	FLT4	FLT41|LMPH1A|PCL|VEGFR3	fms-related tyrosine kinase 4	protein-coding
MACS_peak_287	chr12	124194056	124194226	+	61.63	NA	Intergenic	AluJb|SINE|Alu	-2724	NM_012463	23545	Hs.25786	NM_012463	ENSG00000185344	ATP6V0A2	A2|ARCL|ARCL2A|ATP6A2|ATP6N1D|J6B7|RTF|STV1|TJ6|TJ6M|TJ6S|VPH1|WSS	ATPase, H+ transporting, lysosomal V0 subunit a2	protein-coding
MACS_peak_889	chr20	55666183	55666536	+	61.59	NA	Intergenic	Intergenic	-122393	NR_110631	102723590	Hs.667674	NR_110631		BMP7-AS1	-	BMP7 antisense RNA 1	ncRNA
MACS_peak_350	chr14	72932179	72932451	+	61.51	NA	intron (NM_001204416, intron 6 of 17)	(TGGA)n|Simple_repeat|Simple_repeat	-51213	NR_106994	102465832		NR_106994	ENSG00000273830	MIR7843	hsa-mir-7843	microRNA 7843	ncRNA
MACS_peak_659	chr17	78476749	78476997	+	61.51	NA	Intergenic	Intergenic	-26469	NM_002522	4884	Hs.514556	NM_002522	ENSG00000171246	NPTX1	NP1	neuronal pentraxin I	protein-coding
MACS_peak_461	chr16	1083091	1083299	+	61.51	NA	Intergenic	(TCCA)n|Simple_repeat|Simple_repeat	-39561	NM_001172560	6755	Hs.449840	NM_001053		SSTR5	SS-5-R	somatostatin receptor 5	protein-coding
MACS_peak_1274	chr7	1729635	1729843	+	61.49	NA	Intergenic	(TGGA)n|Simple_repeat|Simple_repeat	-19059	NM_001128636	392617	Hs.42896	NM_001128636	ENSG00000225968	ELFN1	PPP1R28	extracellular leucine-rich repeat and fibronectin type III domain containing 1	protein-coding
MACS_peak_872	chr20	48831150	48831482	+	61.46	NA	Intergenic	(TGGA)n|Simple_repeat|Simple_repeat	-22710	NR_125739	101927559	Hs.442486	NR_125739	ENSG00000277449	CEBPB-AS1	-	CEBPB antisense RNA 1	ncRNA
MACS_peak_1001	chr3	19246498	19246772	+	61.43	NA	intron (NM_144633, intron 1 of 15)	(CCCA)n|Simple_repeat|Simple_repeat	56618	NM_144633	131096	Hs.475656	NM_144633	ENSG00000183960	KCNH8	ELK|ELK1|Kv12.1|elk3	potassium channel, voltage gated eag related subfamily H, member 8	protein-coding
MACS_peak_775	chr2	71845482	71845683	+	61.41	NA	intron (NM_001130979, intron 41 of 55)	(GTGTG)n|Simple_repeat|Simple_repeat	151750	NM_001130987	8291	Hs.252180	NM_003494	ENSG00000135636	DYSF	FER1L1|LGMD2B|MMD1	dysferlin	protein-coding
MACS_peak_1172	chr5	170952882	170953131	+	61.32	NA	Intergenic	(TCCA)n|Simple_repeat|Simple_repeat	106339	NM_003862	8817	Hs.87191	NM_003862	ENSG00000156427	FGF18	FGF-18|ZFGF5	fibroblast growth factor 18	protein-coding
MACS_peak_542	chr16	84000842	84001030	+	61.27	NA	TTS (NM_182981)	TTS (NM_182981)	-1301	NM_019065	54550	Hs.140950	NM_019065	ENSG00000103154	NECAB2	EFCBP2	N-terminal EF-hand calcium binding protein 2	protein-coding
MACS_peak_1475	chr9	135882016	135882236	+	61.21	NA	Intergenic	L2c|LINE|L2	-13691	NR_132981	106635684		NR_132981		SNORD141B	-	small nucleolar RNA, C/D box 141B	snoRNA
MACS_peak_782	chr2	99407786	99408032	+	61.09	NA	Intergenic	L2a|LINE|L2	-19548	NR_126337	101927070	Hs.469395	NR_126337		LOC101927070	-	uncharacterized LOC101927070	ncRNA
MACS_peak_1263	chr7	701580	701790	+	61.08	NA	intron (NM_001164762, intron 4 of 10)	intron (NM_001164762, intron 4 of 10)	50476	NM_002735	5575	Hs.520851	NM_002735	ENSG00000188191	PRKAR1B	PRKAR1	protein kinase, cAMP-dependent, regulatory, type I, beta	protein-coding
MACS_peak_830	chr2	233879783	233879993	+	61.08	NA	Intergenic	(TCCA)n|Simple_repeat|Simple_repeat	-1937	NM_019850	25791	Hs.97316	NM_019850	ENSG00000066248	NGEF	ARHGEF27|EPHEXIN	neuronal guanine nucleotide exchange factor	protein-coding
MACS_peak_917	chr20	60877211	60877560	+	61.04	NA	promoter-TSS (NM_001281438)	promoter-TSS (NM_001281438)	-567	NM_175573	11047	Hs.90107	NM_007002	ENSG00000130706	ADRM1	ARM-1|ARM1|GP110	adhesion regulating molecule 1	protein-coding
MACS_peak_488	chr16	11732908	11733307	+	60.94	NA	Intergenic	(TGGA)n|Simple_repeat|Simple_repeat	-29182	NM_003498	8303	Hs.618526	NM_003498	ENSG00000184602	SNN	-	stannin	protein-coding
MACS_peak_818	chr2	181057711	181057962	+	60.94	NA	Intergenic	L1PA3|LINE|L1	-186056	NM_020943	57703	Hs.311363	NM_020943	ENSG00000163510	CWC22	EIF4GL|NCM|fSAPb	CWC22 homolog, spliceosome-associated protein	protein-coding
MACS_peak_42	chr1	48677275	48677448	+	60.91	NA	Intergenic	HERVH-int|LTR|ERV1	-10996	NM_001135181	200010	Hs.37890	NM_001011547	ENSG00000117834	SLC5A9	SGLT4	solute carrier family 5 (sodium/sugar cotransporter), member 9	protein-coding
MACS_peak_1173	chr5	171025806	171026106	+	60.88	NA	Intergenic	(TGGA)n|Simple_repeat|Simple_repeat	179289	NM_003862	8817	Hs.87191	NM_003862	ENSG00000156427	FGF18	FGF-18|ZFGF5	fibroblast growth factor 18	protein-coding
MACS_peak_827	chr2	227015856	227016156	+	60.88	NA	intron (NR_046102, intron 2 of 6)	intron (NR_046102, intron 2 of 6)	8496	NR_046102	646736	Hs.712836	NR_046102		LOC646736	-	uncharacterized LOC646736	ncRNA
MACS_peak_144	chr10	105484446	105484657	+	60.87	NA	intron (NM_014631, intron 4 of 13)	intron (NM_014631, intron 4 of 13)	-21986	NR_038940	100505839	Hs.655149	NR_038940	ENSG00000280693	SH3PXD2A-AS1	-	SH3PXD2A antisense RNA 1	ncRNA
MACS_peak_1266	chr7	1334357	1334568	+	60.87	NA	Intergenic	(TG)n|Simple_repeat|Simple_repeat	61808	NM_001080461	340260	Hs.232272	NM_001080461		UNCX	UNCX4.1	UNC homeobox	protein-coding
MACS_peak_988	chr3	10266414	10266588	+	60.77	NA	intron (NM_001570, intron 9 of 12)	intron (NM_001570, intron 9 of 12)	-23676	NM_014760	9797	Hs.475401	NM_014760	ENSG00000157014	TATDN2	-	TatD DNase domain containing 2	protein-coding
MACS_peak_555	chr16	85629254	85629556	+	60.75	NA	Intergenic	(TCCA)n|Simple_repeat|Simple_repeat	-15624	NM_001134473	23199	Hs.461647	NM_014615	ENSG00000131149	GSE1	KIAA0182	Gse1 coiled-coil protein	protein-coding
MACS_peak_1221	chr6	27799193	27799405	+	60.66	NA	promoter-TSS (NM_003541)	promoter-TSS (NM_003541)	6	NM_003541	8362	Hs.528055	NM_003541	ENSG00000273542	HIST1H4K	H4/d|H4F2iii|H4FD|dJ160A22.1	histone cluster 1, H4k	protein-coding
MACS_peak_196	chr11	69791398	69791677	+	60.48	NA	Intergenic	(TGGA)n|Simple_repeat|Simple_repeat	118493	NR_120530	101928443	Hs.313468	NR_120529	ENSG00000248844	LOC101928443	-	uncharacterized LOC101928443	ncRNA
MACS_peak_1365	chr8	104244713	104244990	+	60.46	NA	Intergenic	L2b|LINE|L2	-60483	NR_109954	100499183	Hs.654812	NR_034092	ENSG00000247081	BAALC-AS1	-	BAALC antisense RNA 1	ncRNA
MACS_peak_1015	chr3	75613619	75613794	+	60.43	NA	Intergenic	(TGGA)n|Simple_repeat|Simple_repeat	-66208	NR_031714	100302212		NR_031714	ENSG00000221795	MIR1324	MIRN1324|hsa-mir-1324	microRNA 1324	ncRNA
MACS_peak_450	chr15	102073782	102073995	+	60.43	NA	Intergenic	Intergenic	-43701	NM_138322	5046	Hs.498494	NM_002570	ENSG00000140479	PCSK6	PACE4|SPC4	proprotein convertase subtilisin/kexin type 6	protein-coding
MACS_peak_1447	chr9	115913344	115913534	+	60.42	NA	intron (NM_001860, intron 1 of 3)	CpG	201	NM_001860	1318	Hs.24030	NM_001860	ENSG00000136867	SLC31A2	COPT2|CTR2|hCTR2	solute carrier family 31 (copper transporter), member 2	protein-coding
MACS_peak_801	chr2	130013439	130013693	+	60.38	NA	intron (NR_122040, intron 1 of 4)	(CCCA)n|Simple_repeat|Simple_repeat	17898	NR_122041	151121	Hs.531687	NM_001033657	ENSG00000204460	LOC151121	-	uncharacterized LOC151121	ncRNA
MACS_peak_916	chr20	60680673	60681109	+	60.36	NA	Intergenic	(TGGA)n|Simple_repeat|Simple_repeat	-16626	NM_144703	149986	Hs.105379	NM_144703	ENSG00000149657	LSM14B	C20orf40|FAM61B|FT005|LSM13|RAP55B|bA11M20.3	LSM family member 14B	protein-coding
MACS_peak_1228	chr6	53329753	53330045	+	60.26	NA	Intergenic	L2a|LINE|L2	80028	NM_001197115	2729	Hs.654465	NM_001498	ENSG00000001084	GCLC	GCL|GCS|GLCL|GLCLC	glutamate-cysteine ligase, catalytic subunit	protein-coding
MACS_peak_479	chr16	6365324	6365538	+	60.24	NA	intron (NM_001142333, intron 1 of 14)	(TGGA)n|Simple_repeat|Simple_repeat	295727	NM_001308117	54715	Hs.459842	NM_018723	ENSG00000078328	RBFOX1	2BP1|A2BP1|FOX-1|FOX1|HRNBP1	RNA binding protein, fox-1 homolog (C. elegans) 1	protein-coding
MACS_peak_1229	chr6	82453487	82453744	+	60.20	NA	Intergenic	L1MC3|LINE|L1	8813	NM_017633	55603	Hs.10784	NM_017633	ENSG00000112773	FAM46A	C6orf37|XTP11	family with sequence similarity 46, member A	protein-coding
MACS_peak_1200	chr5	178869792	178869997	+	60.19	NA	Intergenic	(TGGA)n|Simple_repeat|Simple_repeat	-97463	NM_014244	9509	Hs.23871	NM_014244	ENSG00000087116	ADAMTS2	ADAM-TS2|ADAMTS-2|ADAMTS-3|NPI|PC I-NP|PCI-NP|PCINP|PCPNI|PNPI	ADAM metallopeptidase with thrombospondin type 1 motif 2	protein-coding
MACS_peak_110	chr10	2565540	2565755	+	60.02	NA	Intergenic	Intergenic	-208379	NR_038884	399708	Hs.521270	NR_038884		LINC00701	-	long intergenic non-protein coding RNA 701	ncRNA
MACS_peak_716	chr19	42817718	42817895	+	59.96	NA	intron (NM_173633, intron 1 of 14)	CpG	329	NM_173633	284339	Hs.382075	NM_173633	ENSG00000167619	TMEM145	-	transmembrane protein 145	protein-coding
MACS_peak_465	chr16	3234202	3234379	+	59.96	NA	Intergenic	Intergenic	-19957	NM_012360	4992	Hs.664502	NM_012360	ENSG00000168124	OR1F1	OLFMF|OR16-36|OR16-37|OR16-88|OR16-89|OR16-90|OR1F10|OR1F13P|OR1F4|OR1F5|OR1F6|OR1F7|OR1F8|OR1F9|OR3-145|ORL1023	olfactory receptor, family 1, subfamily F, member 1	protein-coding
MACS_peak_433	chr15	88182497	88182701	+	59.94	NA	Intergenic	Intergenic	62439	NR_026869	145978	Hs.350808	NM_152454	ENSG00000259527	LINC00052	NCRNA00052|TMEM83	long intergenic non-protein coding RNA 52	ncRNA
MACS_peak_955	chr21	43687346	43687577	+	59.85	NA	intron (NM_207628, intron 4 of 16)	(GTCTG)n|Simple_repeat|Simple_repeat	47453	NM_207174	9619	Hs.124649	NM_004915	ENSG00000160179	ABCG1	ABC8|WHITE1	ATP binding cassette subfamily G member 1	protein-coding
MACS_peak_604	chr17	17363358	17363574	+	59.83	NA	Intergenic	(CACCAT)n|Simple_repeat|Simple_repeat	-16834	NM_018019	55090	Hs.244595	NM_018019	ENSG00000141026	MED9	MED25	mediator complex subunit 9	protein-coding
MACS_peak_156	chr10	134841625	134841841	+	59.83	NA	Intergenic	(TGGA)n|Simple_repeat|Simple_repeat	58468	NR_111905	100128127	Hs.694139	NR_111905		ADGRA1-AS1	GPR123-AS1	adhesion G protein-coupled receptor A1 antisense RNA 1	ncRNA
MACS_peak_119	chr10	6387493	6387804	+	59.80	NA	Intergenic	(TCCA)n|Simple_repeat|Simple_repeat	19141	NR_040079	399715		NR_040079	ENSG00000215244	LOC399715	-	uncharacterized LOC399715	ncRNA
MACS_peak_546	chr16	84359139	84359340	+	59.79	NA	intron (NM_001282466, intron 5 of 6)	intron (NM_001282466, intron 5 of 6)	30927	NM_001282466	58189	Hs.36688	NM_021197	ENSG00000103175	WFDC1	PS20	WAP four-disulfide core domain 1	protein-coding
MACS_peak_860	chr20	46835363	46836704	+	59.69	NA	Intergenic	L2a|LINE|L2	-152621	NR_026958	284749	Hs.299080	NR_026958	ENSG00000235621	LINC00494	-	long intergenic non-protein coding RNA 494	ncRNA
MACS_peak_826	chr2	226707833	226708091	+	59.64	NA	Intergenic	Intergenic	-299548	NR_046102	646736	Hs.712836	NR_046102		LOC646736	-	uncharacterized LOC646736	ncRNA
MACS_peak_976	chr22	27681612	27681829	+	59.63	NA	Intergenic	(TGGA)n|Simple_repeat|Simple_repeat	382465	NR_110540	101929539	Hs.517505	NR_110540	ENSG00000235271	LINC01422	-	long intergenic non-protein coding RNA 1422	ncRNA
MACS_peak_628	chr17	44981362	44981579	+	59.63	NA	Intergenic	(TGGG)n|Simple_repeat|Simple_repeat	-19016	NM_001012511	9570	Hs.463278	NM_004287	ENSG00000108433	GOSR2	Bos1|EPM6|GS27	golgi SNAP receptor complex member 2	protein-coding
MACS_peak_1333	chr7	157884443	157884660	+	59.63	NA	intron (NM_130843, intron 9 of 21)	(TGGG)n|Simple_repeat|Simple_repeat	237274	NR_038966	100506585	Hs.661265	NR_038966	ENSG00000233038	LOC100506585	-	uncharacterized LOC100506585	ncRNA
MACS_peak_1423	chr9	95672661	95672830	+	59.61	NA	Intergenic	Intergenic	27896	NR_111003	642943	Hs.643602	NR_111003		LOC642943	-	SPATA31 subfamily A pseudogene	pseudo
MACS_peak_866	chr20	48112605	48112911	+	59.60	NA	Intergenic	(TCCA)n|Simple_repeat|Simple_repeat	-13577	NM_004975	3745	Hs.84244	NM_004975		KCNB1	DRK1|EIEE26|KV2.1|h-DRK1	potassium channel, voltage gated Shab related subfamily B, member 1	protein-coding
MACS_peak_793	chr2	121144406	121144713	+	59.60	NA	Intergenic	(TCCA)n|Simple_repeat|Simple_repeat	40840	NM_002193	3625	Hs.1735	NM_002193	ENSG00000163083	INHBB	-	inhibin beta B	protein-coding
MACS_peak_19	chr1	11954405	11954703	+	59.60	NA	Intergenic	(TGGA)n|Simple_repeat|Simple_repeat	31931	NM_138346	90231	Hs.520094	NM_138346	ENSG00000116685	KIAA2013	-	KIAA2013	protein-coding
MACS_peak_1360	chr8	102347629	102348018	+	59.55	NA	Intergenic	L1MC5|LINE|L1	-33298	NR_002182	83955	Hs.567608	NM_032031	ENSG00000228224	NACAP1	FKSG17	nascent-polypeptide-associated complex alpha polypeptide pseudogene 1	pseudo
MACS_peak_114	chr10	4492789	4493024	+	59.51	NA	Intergenic	Intergenic	44245	NR_108056	100507059	Hs.158438	NR_108054	ENSG00000224382	LINC00703	-	long intergenic non-protein coding RNA 703	ncRNA
MACS_peak_416	chr15	71397074	71397407	+	59.50	NA	Intergenic	MER49|LTR|ERV1	10599	NM_001102658	196993	Hs.646533	NM_001102658	ENSG00000225362	CT62	-	cancer/testis antigen 62	protein-coding
MACS_peak_486	chr16	11579762	11580009	+	59.50	NA	Intergenic	Intergenic	20769	NR_110907	101927131	Hs.569654	NR_110907	ENSG00000262999	LOC101927131	-	uncharacterized LOC101927131	ncRNA
MACS_peak_1273	chr7	1670544	1670862	+	59.48	NA	Intergenic	(TCCA)n|Simple_repeat|Simple_repeat	16597	NR_001288	260341	Hs.534596	NR_001288		TFAMP1	MTTF1|TCF6L1	transcription factor A, mitochondrial pseudogene 1	pseudo
MACS_peak_241	chr12	39978435	39978668	+	59.44	NA	intron (NM_005164, intron 7 of 9)	L1PA14|LINE|L1	35292	NM_005164	225	Hs.117852	NM_005164	ENSG00000173208	ABCD2	ABC39|ALDL1|ALDR|ALDRP|hALDR	ATP binding cassette subfamily D member 2	protein-coding
MACS_peak_710	chr19	37074952	37075170	+	59.43	NA	intron (NR_027239, intron 2 of 2)	L1ME3|LINE|L1	-10864	NM_020951	57711	Hs.654960	NM_020951	ENSG00000186020	ZNF529	-	zinc finger protein 529	protein-coding
MACS_peak_751	chr2	9792414	9792689	+	59.35	NA	Intergenic	(TCCA)n|Simple_repeat|Simple_repeat	-21367	NM_006826	10971	Hs.74405	NM_006826	ENSG00000134308	YWHAQ	14-3-3|1C5|HS1	tyrosine 3-monooxygenase/tryptophan 5-monooxygenase activation protein, theta	protein-coding
MACS_peak_528	chr16	70170526	70170889	+	59.35	NA	intron (NM_017990, intron 10 of 18)	AluSz|SINE|Alu	23178	NM_017990	55066	Hs.744043	NM_017990	ENSG00000090857	PDPR	PDP3	pyruvate dehydrogenase phosphatase regulatory subunit	protein-coding
MACS_peak_1460	chr9	130693589	130693863	+	59.34	NA	promoter-TSS (NM_001135219)	promoter-TSS (NM_001135219)	-650	NM_001135219	138429	Hs.734928	NM_173492	ENSG00000167103	PIP5KL1	PIPKH|bA203J24.5	phosphatidylinositol-4-phosphate 5-kinase-like 1	protein-coding
MACS_peak_222	chr11	80620063	80620256	+	59.29	NA	Intergenic	L1PB1|LINE|L1	-146313	NR_120570	101928944	Hs.547927	NR_120570	ENSG00000255178	LOC101928944	-	uncharacterized LOC101928944	ncRNA
MACS_peak_61	chr1	148927332	148927735	+	59.28	NA	promoter-TSS (NR_027356)	promoter-TSS (NR_027356)	-780	NR_027356	645166	Hs.744183	NR_027354		LOC645166	-	lymphocyte-specific protein 1 pseudogene	pseudo
MACS_peak_370	chr14	98163859	98164119	+	59.28	NA	Intergenic	Intergenic	-10994	NR_033943	100129345	Hs.23632	NR_033943	ENSG00000197176	LOC100129345	-	uncharacterized LOC100129345	ncRNA
MACS_peak_1099	chr4	26069604	26069784	+	59.27	NA	Intergenic	Intergenic	153880	NM_001145432	389203	Hs.479386	NM_001145432	ENSG00000250317	SMIM20	C4orf52	small integral membrane protein 20	protein-coding
MACS_peak_1007	chr3	49732879	49733041	+	59.23	NA	intron (NM_022064, intron 3 of 38)	intron (NM_022064, intron 3 of 38)	6010	NM_022064	63891	Hs.553723	NM_022064	ENSG00000164068	RNF123	FP1477|KPC1	ring finger protein 123	protein-coding
MACS_peak_618	chr17	21312095	21312463	+	59.20	NA	intron (NM_001194958, intron 2 of 2)	(TCCA)n|Simple_repeat|Simple_repeat	3831	NM_001194958	100134444	Hs.200629	NM_001194958	ENSG00000260458	KCNJ18	KIR2.6|TTPP2	potassium channel, inwardly rectifying subfamily J, member 18	protein-coding
MACS_peak_127	chr10	13973890	13974151	+	59.10	NA	intron (NM_018027, intron 2 of 24)	intron (NM_018027, intron 2 of 24)	-142263	NR_120638	101928453	Hs.650212	NR_120638		LOC101928453	-	uncharacterized LOC101928453	ncRNA
MACS_peak_630	chr17	46558198	46558500	+	59.08	NA	Intergenic	Intergenic	36154	NR_110804	101927166	Hs.149244	NR_110804		LOC101927166	-	uncharacterized LOC101927166	ncRNA
MACS_peak_717	chr19	45393562	45393910	+	59.06	NA	promoter-TSS (NM_001128917)	promoter-TSS (NM_001128917)	-741	NM_001128917	10452	Hs.655909	NM_006114	ENSG00000130204	TOMM40	C19orf1|D19S1177E|PER-EC1|PEREC1|TOM40	translocase of outer mitochondrial membrane 40 homolog (yeast)	protein-coding
MACS_peak_1154	chr5	124304867	124305087	+	59.02	NA	Intergenic	HERVH-int|LTR|ERV1	-67547	NR_109882	101927421	Hs.121305	NR_109882		LOC101927421	-	uncharacterized LOC101927421	ncRNA
MACS_peak_375	chr14	102178575	102178795	+	59.02	NA	Intergenic	(CACCT)n|Simple_repeat|Simple_repeat	-18089	NR_026774	145200	Hs.150840	NR_026774	ENSG00000258512	LINC00239	C14orf72|NCRNA00239	long intergenic non-protein coding RNA 239	ncRNA
MACS_peak_1390	chr8	142723684	142724149	+	58.96	NA	Intergenic	(TGG)n|Simple_repeat|Simple_repeat	143758	NR_031636	100302147		NR_031636		MIR1302-7	MIRN1302-7|hsa-mir-1302-7	microRNA 1302-7	ncRNA
MACS_peak_991	chr3	11099522	11099760	+	58.92	NA	Intergenic	(TGGA)n|Simple_repeat|Simple_repeat	-38731	NR_046647	100874090	Hs.628542	NR_046647	ENSG00000232287	SLC6A1-AS1	-	SLC6A1 antisense RNA 1	ncRNA
MACS_peak_1429	chr9	96433322	96433591	+	58.89	NA	intron (NM_005392, intron 17 of 21)	G-rich|Low_complexity|Low_complexity	76333	NR_049853	100847045		NR_049853		MIR548AU	-	microRNA 548au	ncRNA
MACS_peak_780	chr2	91706835	91707167	+	58.86	NA	Intergenic	(GCTG)n|Simple_repeat|Simple_repeat	140974	NR_027238	654342	Hs.469287	NR_027238		LOC654342	-	lymphocyte-specific protein 1 pseudogene	pseudo
MACS_peak_1162	chr5	139435509	139435691	+	58.82	NA	Intergenic	Intergenic	-12716	NM_013983	9542	Hs.408515	NM_004883	ENSG00000158458	NRG2	DON1|HRG2|NTAK	neuregulin 2	protein-coding
MACS_peak_1182	chr5	173165381	173165598	+	58.76	NA	intron (NR_108027, intron 1 of 2)	intron (NR_108027, intron 1 of 2)	7723	NR_108027	101928136	Hs.449267	NR_108027	ENSG00000253686	LINC01484	-	long intergenic non-protein coding RNA 1484	ncRNA
MACS_peak_790	chr2	113699674	113699893	+	58.76	NA	Intergenic	Intergenic	27013	NM_173205	27178	Hs.166371	NM_014439	ENSG00000125571	IL37	FIL1|FIL1(ZETA)|FIL1Z|IL-1F7|IL-1H|IL-1H4|IL-1RP1|IL-37|IL1F7|IL1H4|IL1RP1	interleukin 37	protein-coding
MACS_peak_39	chr1	38893647	38893864	+	58.76	NA	Intergenic	HERVH-int|LTR|ERV1	-213316	NR_038928	339442	Hs.434245	NR_038928	ENSG00000237290	LINC01343	-	long intergenic non-protein coding RNA 1343	ncRNA
MACS_peak_129	chr10	20839394	20839596	+	58.76	NA	Intergenic	Intergenic	-1404	NR_039822	100616383		NR_039822	ENSG00000265372	MIR4675	-	microRNA 4675	ncRNA
MACS_peak_1030	chr3	127347125	127347315	+	58.76	NA	promoter-TSS (NM_015720)	promoter-TSS (NM_015720)	-782	NM_015720	50512	Hs.591290	NM_015720	ENSG00000114631	PODXL2	EG|PODLX2	podocalyxin-like 2	protein-coding
MACS_peak_355	chr14	89827096	89827261	+	58.76	NA	intron (NM_001085471, intron 2 of 6)	(CCA)n|Simple_repeat|Simple_repeat	56276	NM_005197	1112	Hs.434286	NM_005197	ENSG00000053254	FOXN3	C14orf116|CHES1|PRO1635	forkhead box N3	protein-coding
MACS_peak_374	chr14	102016793	102017006	+	58.76	NA	Intergenic	(TGGA)n|Simple_repeat|Simple_repeat	5114	NR_002770	64150	Hs.525597	NR_002770		DIO3OS	C14orf134|DIO3-AS1|DIO3-OS|NCRNA00041	DIO3 opposite strand/antisense RNA (head to head)	ncRNA
MACS_peak_771	chr2	63794001	63794214	+	58.76	NA	intron (NM_015910, intron 1 of 17)	MER21C|LTR|ERVL	-21636	NM_001316374	4190	Hs.526521	NM_005917	ENSG00000014641	MDH1	HEL-S-32|MDH-s|MDHA|MGC:1375|MOR2	malate dehydrogenase 1	protein-coding
MACS_peak_928	chr20	62092707	62092933	+	58.75	NA	intron (NM_172106, intron 1 of 15)	intron (NM_172106, intron 1 of 15)	11173	NM_004518	3785	Hs.161851	NM_004518	ENSG00000075043	KCNQ2	BFNC|BFNS1|EBN|EBN1|EIEE7|ENB1|HNSPC|KCNA11|KV7.2|KVEBN1	potassium channel, voltage gated KQT-like subfamily Q, member 2	protein-coding
MACS_peak_1505	chr9	139524933	139525222	+	58.75	NA	Intergenic	Intergenic	-28231	NR_046367	51162	Hs.91481	NM_016215	ENSG00000172889	EGFL7	NEU1|VE-STATIN|ZNEU1	EGF-like-domain, multiple 7	protein-coding
MACS_peak_1219	chr6	15283260	15283472	+	58.71	NA	intron (NM_001267040, intron 1 of 17)	AluY|SINE|Alu	34280	NM_001267040	3720	Hs.269059	NM_004973	ENSG00000008083	JARID2	JMJ	jumonji, AT rich interactive domain 2	protein-coding
MACS_peak_1295	chr7	88048037	88048333	+	58.69	NA	Intergenic	(TTAGGC)n|Simple_repeat|Simple_repeat	-111957	NM_001205315	79689	Hs.521008	NM_024636		STEAP4	STAMP2|TIARP|TNFAIP9	STEAP family member 4	protein-coding
MACS_peak_1147	chr5	76460421	76460550	+	58.68	NA	Intergenic	Intergenic	-46221	NM_001029851	8622	Hs.584830	NM_003719	ENSG00000113231	PDE8B	ADSD|PPNAD3	phosphodiesterase 8B	protein-coding
MACS_peak_1450	chr9	116882862	116883052	+	58.64	NA	Intergenic	(TGGA)n|Simple_repeat|Simple_repeat	-21620	NM_138424	113220	Hs.28149	NM_138424	ENSG00000136883	KIF12	-	kinesin family member 12	protein-coding
MACS_peak_1260	chr7	568222	568534	+	58.62	NA	Intergenic	(TGGA)n|Simple_repeat|Simple_repeat	8350	NR_033963	441307	Hs.521334	NR_033963	ENSG00000223855	HRAT92	-	heart tissue-associated transcript 92	ncRNA
MACS_peak_89	chr1	227975765	227975987	+	58.62	NA	Intergenic	CpG	-27542	NM_183062	339501	Hs.97604	NM_183062	ENSG00000185888	PRSS38	MPN2	protease, serine 38	protein-coding
MACS_peak_455	chr16	335843	336065	+	58.62	NA	intron (NM_006849, intron 7 of 10)	CpG	2836	NM_006849	64714	Hs.66581	NM_006849	ENSG00000185615	PDIA2	PDA2|PDI|PDIP|PDIR	protein disulfide isomerase family A, member 2	protein-coding
MACS_peak_1150	chr5	96277538	96277760	+	58.61	NA	intron (NM_005575, intron 1 of 17)	intron (NM_005575, intron 1 of 17)	6303	NM_005575	4012	Hs.527199	NM_005575	ENSG00000113441	LNPEP	CAP|IRAP|P-LAP|PLAP	leucyl/cystinyl aminopeptidase	protein-coding
MACS_peak_1306	chr7	99698069	99698381	+	58.59	NA	promoter-TSS (NM_004722)	promoter-TSS (NM_004722)	178	NM_182776	4176	Hs.438720	NM_005916	ENSG00000166508	MCM7	CDC47|MCM2|P1.1-MCM3|P1CDC47|P85MCM|PNAS146|PPP1R104	minichromosome maintenance complex component 7	protein-coding
MACS_peak_334	chr13	100115298	100115481	+	58.59	NA	Intergenic	(TGGA)n|Simple_repeat|Simple_repeat	36171	NR_110731	102725509	Hs.648968	NR_110731	ENSG00000280734	LINC01232	TCONS_00021520	long intergenic non-protein coding RNA 1232	ncRNA
MACS_peak_732	chr19	51998231	51998495	+	58.56	NA	intron (NM_033329, intron 6 of 6)	L1MB2|LINE|L1	5284	NM_033329	89858	Hs.249741	NM_033329	ENSG00000254521	SIGLEC12	S2V|SIGLECL1|SLG|Siglec-XII	sialic acid binding Ig-like lectin 12 (gene/pseudogene)	protein-coding
MACS_peak_1420	chr9	91985468	91985732	+	58.56	NA	intron (NM_001142287, intron 18 of 20)	intron (NM_001142287, intron 18 of 20)	51834	NM_001282690	79048	Hs.59804	NM_024077	ENSG00000187742	SECISBP2	SBP2	SECIS binding protein 2	protein-coding
MACS_peak_905	chr20	59525261	59525610	+	58.54	NA	Intergenic	(TGGA)n|Simple_repeat|Simple_repeat	-128685	NR_109919	100506470	Hs.125674	NR_109919	ENSG00000229606	LOC100506470	-	uncharacterized LOC100506470	ncRNA
MACS_peak_1206	chr5	180237049	180237280	+	58.49	NA	promoter-TSS (NM_001114617)	promoter-TSS (NM_001114617)	-27	NM_001114617	4245	Hs.519818	NM_002406	ENSG00000131446	MGAT1	GLCNAC-TI|GLCT1|GLYT1|GNT-1|GNT-I|MGAT	mannosyl (alpha-1,3-)-glycoprotein beta-1,2-N-acetylglucosaminyltransferase	protein-coding
MACS_peak_1285	chr7	57273390	57273537	+	58.47	NA	Intergenic	Intergenic	-25600	NR_030766	642006	Hs.562648	NR_030766		GUSBP10	-	glucuronidase, beta pseudogene 10	pseudo
MACS_peak_762	chr2	26980995	26981226	+	58.45	NA	Intergenic	MER41A|LTR|ERV1	-6032	NM_017877	54978	Hs.1594	NM_017877	ENSG00000213699	SLC35F6	ANT2BP|C2orf18|TANGO9	solute carrier family 35, member F6	protein-coding
MACS_peak_15	chr1	8382191	8382414	+	58.43	NA	intron (NM_001080397, intron 1 of 8)	(TGGA)n|Simple_repeat|Simple_repeat	4157	NM_001080397	50651	Hs.463036	NM_001080397	ENSG00000162426	SLC45A1	DNB5	solute carrier family 45, member 1	protein-coding
MACS_peak_981	chr22	31595542	31595765	+	58.43	NA	intron (NR_024210, intron 5 of 6)	intron (NR_024210, intron 5 of 6)	-12597	NM_005569	3985	Hs.474596	NM_005569	ENSG00000182541	LIMK2	-	LIM domain kinase 2	protein-coding
MACS_peak_1082	chr4	3580475	3580741	+	58.40	NA	intron (NR_040045, intron 1 of 2)	(TCCA)n|Simple_repeat|Simple_repeat	2012	NR_040045	285492	Hs.145563	NM_173661		LINC00955	-	long intergenic non-protein coding RNA 955	ncRNA
MACS_peak_498	chr16	18770896	18771174	+	58.38	NA	Intergenic	(TGGA)n|Simple_repeat|Simple_repeat	30621	NM_001030009	6210	Hs.370504	NM_001019	ENSG00000134419	RPS15A	S15a	ribosomal protein S15a	protein-coding
MACS_peak_1205	chr5	180204623	180204816	+	58.37	NA	Intergenic	Intergenic	25329	NM_002406	4245	Hs.519818	NM_002406	ENSG00000131446	MGAT1	GLCNAC-TI|GLCT1|GLYT1|GNT-1|GNT-I|MGAT	mannosyl (alpha-1,3-)-glycoprotein beta-1,2-N-acetylglucosaminyltransferase	protein-coding
MACS_peak_725	chr19	49964535	49964719	+	58.35	NA	intron (NM_153329, intron 5 of 16)	MSR1|Satellite|Satellite	8154	NM_001145396	126133	Hs.719998	NM_153329	ENSG00000161618	ALDH16A1	-	aldehyde dehydrogenase 16 family, member A1	protein-coding
MACS_peak_136	chr10	34339950	34340151	+	58.32	NA	Intergenic	(TTGG)n|Simple_repeat|Simple_repeat	-278442	NR_038932	100505583	Hs.568804	NR_038932	ENSG00000261683	LINC00838	-	long intergenic non-protein coding RNA 838	ncRNA
MACS_peak_1413	chr9	13094424	13094647	+	58.31	NA	Intergenic	Intergenic	-121903	NR_132976	106635615		NR_132976		SNORD137	-	small nucleolar RNA, C/D box 137	snoRNA
MACS_peak_435	chr15	90863406	90863610	+	58.28	NA	Intergenic	Intergenic	29171	NR_028287	23766	Hs.592014	NR_028287		GABARAPL3	ATG8D	GABA(A) receptors associated protein like 3, pseudogene	pseudo
MACS_peak_255	chr12	89858847	89859015	+	58.15	NA	intron (NR_037659, intron 8 of 11)	intron (NR_037659, intron 8 of 11)	59652	NM_003774	8693	Hs.25130	NM_003774	ENSG00000257594	GALNT4	GALNAC-T4|GALNACT4	polypeptide N-acetylgalactosaminyltransferase 4	protein-coding
MACS_peak_1530	chrX	129217620	129217805	+	58.14	NA	intron (NM_001127197, intron 1 of 8)	L2b|LINE|L2	26763	NM_001421	2000	Hs.271940	NM_001421	ENSG00000102034	ELF4	ELFR|MEF	E74-like factor 4 (ets domain transcription factor)	protein-coding
MACS_peak_57	chr1	142542247	142542519	+	57.94	NA	Intergenic	(GAATG)n|Satellite|Satellite	171222	NR_046228	100874392	Hs.648245	NR_046228		ANKRD20A12P	-	ankyrin repeat domain 20 family, member A12, pseudogene	pseudo
MACS_peak_132	chr10	31842049	31842235	+	57.92	NA	Intergenic	AluSx1|SINE|Alu	232078	NM_001174094	6935	Hs.124503	NM_030751	ENSG00000148516	ZEB1	AREB6|BZP|DELTAEF1|FECD6|NIL2A|PPCD3|TCF8|ZFHEP|ZFHX1A	zinc finger E-box binding homeobox 1	protein-coding
MACS_peak_504	chr16	23039098	23039284	+	57.92	NA	Intergenic	MER5A|DNA|hAT-Charlie	121400	NM_020718	57478	Hs.183817	NM_020718	ENSG00000103404	USP31	-	ubiquitin specific peptidase 31	protein-coding
MACS_peak_1005	chr3	26525228	26525431	+	57.89	NA	Intergenic	Intergenic	-138971	NM_052953	116135	Hs.517868	NM_052953	ENSG00000179796	LRRC3B	LRP15	leucine rich repeat containing 3B	protein-coding
MACS_peak_440	chr15	98029771	98029897	+	57.89	NA	intron (NR_120324, intron 2 of 4)	L1PA11|LINE|L1	35207	NR_120324	101927286	Hs.611279	NR_120324	ENSG00000259664	LOC101927286	-	uncharacterized LOC101927286	ncRNA
MACS_peak_295	chr12	129883758	129884063	+	57.87	NA	intron (NM_133448, intron 3 of 8)	MSTD|LTR|ERVL-MaLR	190764	NR_110058	101927735	Hs.569212	NR_110058	ENSG00000256699	LOC101927735	-	uncharacterized LOC101927735	ncRNA
MACS_peak_709	chr19	35623738	35624006	+	57.86	NA	intron (NM_139284, intron 3 of 8)	HAL1-2a_MD|LINE|L1	2306	NM_139284	163175	Hs.65256	NM_139284	ENSG00000153902	LGI4	LGIL3	leucine-rich repeat LGI family, member 4	protein-coding
MACS_peak_856	chr20	43392610	43392878	+	57.86	NA	intron (NM_182970, intron 2 of 5)	(TCCA)n|Simple_repeat|Simple_repeat	-17876	NR_132377	106144538	Hs.255479	NR_132377		KCNK15-AS1	-	KCNK15 antisense RNA 1 (head to head)	ncRNA
MACS_peak_337	chr14	23245264	23245490	+	57.84	NA	intron (NM_001126106, intron 6 of 10)	intron (NM_001126106, intron 6 of 10)	9646	NM_005015	5018	Hs.151134	NM_005015	ENSG00000155463	OXA1L	OXA1	oxidase (cytochrome c) assembly 1-like	protein-coding
MACS_peak_1136	chr5	20535665	20535953	+	57.73	NA	intron (NM_001291956, intron 1 of 14)	intron (NM_001291956, intron 1 of 14)	40173	NM_001291956	1016	Hs.317632	NM_004934	ENSG00000145526	CDH18	CDH14|CDH14L|CDH24	cadherin 18, type 2	protein-coding
MACS_peak_1096	chr4	8168680	8168830	+	57.72	NA	Intergenic	Intergenic	-8196	NM_001130088	84448	Hs.233404	NM_032432	ENSG00000163995	ABLIM2	-	actin binding LIM protein family, member 2	protein-coding
MACS_peak_105	chr10	1619473	1619623	+	57.72	NA	intron (NM_018702, intron 1 of 9)	intron (NM_018702, intron 1 of 9)	50723	NR_033387	642394	Hs.568831	NM_001098830	ENSG00000205696	ADARB2-AS1	C10orf109|NCRNA00168|bA466B20.1	ADARB2 antisense RNA 1	ncRNA
MACS_peak_1115	chr5	583852	584079	+	57.65	NA	Intergenic	(TGGA)n|Simple_repeat|Simple_repeat	28360	NR_103444	100996325	Hs.575249	NR_103444		LOC100996325	-	uncharacterized LOC100996325	ncRNA
MACS_peak_1362	chr8	102840988	102841270	+	57.53	NA	intron (NM_001040628, intron 4 of 7)	L2a|LINE|L2	-37690	NM_032041	83988	Hs.492427	NM_032041	ENSG00000104490	NCALD	-	neurocalcin delta	protein-coding
MACS_peak_349	chr14	70721390	70721576	+	57.52	NA	Intergenic	LTR12C|LTR|ERV1	-6965	NR_003951	145241	Hs.712468	NR_003951	ENSG00000235812	ADAM21P1	ADAM21P	ADAM metallopeptidase domain 21 pseudogene 1	pseudo
MACS_peak_734	chr19	56053777	56053965	+	57.49	NA	intron (NM_001199824, intron 3 of 3)	(TCCA)n|Simple_repeat|Simple_repeat	3038	NM_001199824	100130827	Hs.712129	NM_001199824	ENSG00000231274	SBK3	SGK110	SH3 domain binding kinase family, member 3	protein-coding
MACS_peak_1280	chr7	30226000	30226188	+	57.49	NA	Intergenic	THE1C|LTR|ERVL-MaLR	51542	NM_152793	222166	Hs.200100	NM_152793	ENSG00000180354	MTURN	C7orf41|Ells1	maturin, neural progenitor differentiation regulator homolog (Xenopus)	protein-coding
MACS_peak_1528	chrX	111974880	111975031	+	57.47	NA	Intergenic	LTR8A|LTR|ERV1	49061	NR_036255	100423009		NR_036255	ENSG00000263351	MIR4329	-	microRNA 4329	ncRNA
MACS_peak_526	chr16	33865073	33865696	+	57.46	NA	Intergenic	AluSz6|SINE|Alu	97119	NR_038368	649159	Hs.532675	NM_001040069	ENSG00000256642	LINC00273	NCRNA00273|TOP	long intergenic non-protein coding RNA 273	ncRNA
MACS_peak_1032	chr3	128681419	128681647	+	57.45	NA	Intergenic	HERVH-int|LTR|ERV1	31453	NM_020741	57501	Hs.518247	NM_020741		KIAA1257	-	KIAA1257	protein-coding
MACS_peak_286	chr12	122186884	122187112	+	57.45	NA	intron (NM_001080825, intron 3 of 11)	intron (NM_001080825, intron 3 of 11)	36340	NM_001080825	144404	Hs.644504	NM_001080825	ENSG00000188735	TMEM120B	-	transmembrane protein 120B	protein-coding
MACS_peak_1502	chr9	138465025	138465296	+	57.43	NA	Intergenic	(TCCA)n|Simple_repeat|Simple_repeat	-1611	NR_034016	100130954	Hs.550769	NR_034016	ENSG00000237339	LINC01502	-	long intergenic non-protein coding RNA 1502	ncRNA
MACS_peak_299	chr12	131243498	131243769	+	57.34	NA	Intergenic	HAL1-2a_MD|LINE|L1	80186	NM_194356	2054	Hs.437585	NM_001980	ENSG00000111450	STX2	EPIM|EPM|STX2A|STX2B|STX2C	syntaxin 2	protein-coding
MACS_peak_332	chr13	37574651	37574905	+	57.32	NA	promoter-TSS (NM_181503)	promoter-TSS (NM_181503)	100	NM_181503	11340	Hs.294041	NM_181503	ENSG00000120699	EXOSC8	CIP3|EAP2|OIP2|PCH1C|RRP43|Rrp43p|bA421P11.3|p9	exosome component 8	protein-coding
MACS_peak_888	chr20	55613959	55614537	+	57.32	NA	Intergenic	(TGGA)n|Simple_repeat|Simple_repeat	-174504	NR_110631	102723590	Hs.667674	NR_110631		BMP7-AS1	-	BMP7 antisense RNA 1	ncRNA
MACS_peak_1239	chr6	126419484	126419673	+	57.27	NA	Intergenic	Intergenic	24184	NR_049880	100847016		NR_049880	ENSG00000266721	MIR5695	-	microRNA 5695	ncRNA
MACS_peak_1094	chr4	8035992	8036181	+	57.27	NA	intron (NM_001286688, intron 5 of 14)	(TGGG)n|Simple_repeat|Simple_repeat	-28978	NR_029511	407052		NR_029511	ENSG00000207807	MIR95	MIRN95|hsa-mir-95|miR-95	microRNA 95	ncRNA
MACS_peak_1019	chr3	97707867	97708096	+	57.26	NA	intron (NR_047685, intron 9 of 9)	(ATGGTG)n|Simple_repeat|Simple_repeat	-16686	NM_032778	84864	Hs.570562	NM_032778	ENSG00000170854	MINA	MDIG|MINA53|NO52|ROX	MYC induced nuclear antigen	protein-coding
MACS_peak_171	chr11	24191443	24191632	+	57.25	NA	Intergenic	L1HS|LINE|L1	-326979	NM_001009909	338645	Hs.144138	NM_001009909	ENSG00000187398	LUZP2	KFSP2566|PRO6246	leucine zipper protein 2	protein-coding
MACS_peak_1089	chr4	7696935	7697125	+	57.05	NA	intron (NM_020777, intron 11 of 26)	(TGGA)n|Simple_repeat|Simple_repeat	-58787	NR_026892	84740	Hs.663029	NM_032654	ENSG00000272620	AFAP1-AS1	AFAP1-AS|AFAP1AS	AFAP1 antisense RNA 1	ncRNA
MACS_peak_47	chr1	110742432	110742622	+	57.04	NA	3' UTR (NM_001010898, exon 12 of 12)	3' UTR (NM_001010898, exon 12 of 12)	10082	NR_046546	100873974	Hs.130515	NR_046546		KCNC4-AS1	-	KCNC4 antisense RNA 1 (head to head)	ncRNA
MACS_peak_1156	chr5	127372769	127373037	+	56.88	NA	intron (NR_015360, intron 2 of 2)	intron (NR_015360, intron 2 of 2)	45863	NR_015360	644873	Hs.340623	NR_015360	ENSG00000245937	LINC01184	-	long intergenic non-protein coding RNA 1184	ncRNA
MACS_peak_933	chr20	62669609	62669883	+	56.86	NA	non-coding (NR_027686, exon 3 of 4)	non-coding (NR_027686, exon 3 of 4)	4049	NR_027687	284739	Hs.97840	NM_207349	ENSG00000196421	LINC00176	NCRNA00176|PRR17	long intergenic non-protein coding RNA 176	ncRNA
MACS_peak_1409	chr8	145756761	145756952	+	56.84	NA	intron (NM_025251, intron 9 of 10)	intron (NM_025251, intron 9 of 10)	-2398	NM_001001795	414919	Hs.105685	NM_001001795		C8orf82	-	chromosome 8 open reading frame 82	protein-coding
MACS_peak_742	chr2	1531055	1531246	+	56.84	NA	intron (NM_175721, intron 13 of 14)	intron (NM_175721, intron 13 of 14)	112970	NM_175721	7173	Hs.467554	NM_000547	ENSG00000115705	TPO	MSA|TDH2A|TPX	thyroid peroxidase	protein-coding
MACS_peak_1370	chr8	124742861	124743267	+	56.83	NA	intron (NM_004306, intron 1 of 10)	THE1B|LTR|ERVL-MaLR	6583	NM_001003954	312	Hs.181107	NM_004306	ENSG00000104537	ANXA13	ANX13|ISA	annexin A13	protein-coding
MACS_peak_463	chr16	1335070	1335302	+	56.69	NA	Intergenic	Intergenic	-23968	NM_194261	7329	Hs.302903	NM_003345	ENSG00000103275	UBE2I	C358B7.1|P18|UBC9	ubiquitin conjugating enzyme E2I	protein-coding
MACS_peak_220	chr11	77867335	77867775	+	56.64	NA	intron (NR_102281, intron 2 of 2)	intron (NR_102281, intron 2 of 2)	16716	NR_102280	100289388	Hs.628183	NM_203432	ENSG00000246174	KCTD21-AS1	-	KCTD21 antisense RNA 1	ncRNA
MACS_peak_82	chr1	204008044	204008264	+	56.63	NA	intron (NR_027902, intron 2 of 5)	MIR3|SINE|MIR	2238	NR_027902	284573	Hs.406979	NR_027902	ENSG00000176754	LINC00303	C1orf157|NCRNA00303	long intergenic non-protein coding RNA 303	ncRNA
MACS_peak_1291	chr7	76626707	76626961	+	56.63	NA	intron (NR_023383, intron 2 of 10)	(TG)n|Simple_repeat|Simple_repeat	16695	NR_023383	441263	Hs.675888	NR_023383	ENSG00000265479	DTX2P1-UPK3BP1-PMS2P11	PMS2L11|PMS2P11|PMSR6	DTX2P1-UPK3BP1-PMS2P11 readthrough transcribed pseudogene	pseudo
MACS_peak_1112	chr4	187357388	187357613	+	56.60	NA	intron (NR_033900, intron 1 of 3)	intron (NR_033900, intron 1 of 3)	64712	NR_033900	285441	Hs.481369	NR_033900	ENSG00000251165	F11-AS1	-	F11 antisense RNA 1	ncRNA
MACS_peak_76	chr1	187663601	187663780	+	56.49	NA	Intergenic	Intergenic	250930	NR_132374	106144535	Hs.568709	NR_132374		LINC01037	-	long intergenic non-protein coding RNA 1037	ncRNA
MACS_peak_1188	chr5	175211056	175211249	+	56.42	NA	Intergenic	Intergenic	-12458	NM_006650	10814	Hs.193235	NM_006650	ENSG00000145920	CPLX2	921-L|CPX-2|CPX2|Hfb1	complexin 2	protein-coding
MACS_peak_102	chr10	1486629	1486822	+	56.42	NA	intron (NM_018702, intron 1 of 9)	(TCCA)n|Simple_repeat|Simple_repeat	-82100	NR_033387	642394	Hs.568831	NM_001098830	ENSG00000205696	ADARB2-AS1	C10orf109|NCRNA00168|bA466B20.1	ADARB2 antisense RNA 1	ncRNA
MACS_peak_807	chr2	152400243	152400390	+	56.41	NA	intron (NM_001164508, intron 135 of 181)	intron (NM_001164508, intron 135 of 181)	133712	NM_001177665	55183	Hs.655671	NM_018151	ENSG00000080345	RIF1	-	replication timing regulatory factor 1	protein-coding
MACS_peak_1045	chr3	169316044	169316168	+	56.38	NA	intron (NM_004991, intron 1 of 16)	intron (NM_004991, intron 1 of 16)	65457	NM_001205194	2122	Hs.744090	NM_004991	ENSG00000085276	MECOM	AML1-EVI-1|EVI1|MDS1|MDS1-EVI1|PRDM3	MDS1 and EVI1 complex locus	protein-coding
MACS_peak_999	chr3	14988620	14988965	+	56.38	NA	promoter-TSS (NM_003298)	promoter-TSS (NM_003298)	220	NR_046254	100505641	Hs.517821	NR_046251	ENSG00000225733	FGD5-AS1	-	FGD5 antisense RNA 1	ncRNA
MACS_peak_200	chr11	70040767	70041043	+	56.32	NA	Intergenic	(TGGA)n|Simple_repeat|Simple_repeat	-8364	NM_003824	8772	Hs.86131	NM_003824	ENSG00000168040	FADD	GIG3|MORT1	Fas (TNFRSF6)-associated via death domain	protein-coding
MACS_peak_475	chr16	5980296	5980530	+	56.32	NA	Intergenic	(TGGG)n|Simple_repeat|Simple_repeat	-88719	NM_001142333	54715	Hs.459842	NM_018723	ENSG00000078328	RBFOX1	2BP1|A2BP1|FOX-1|FOX1|HRNBP1	RNA binding protein, fox-1 homolog (C. elegans) 1	protein-coding
MACS_peak_802	chr2	132338584	132338735	+	56.21	NA	Intergenic	Intergenic	-15688	NR_033885	440915	Hs.631267	NM_001017421		POTEKP	ACT|ACTBL3|POTE2delta|POTEK	POTE ankyrin domain family, member K, pseudogene	pseudo
MACS_peak_768	chr2	47226259	47226470	+	56.20	NA	intron (NM_020458, intron 8 of 19)	(TCCA)n|Simple_repeat|Simple_repeat	-57370	NM_001171511	90411	Hs.662152	NM_139279	ENSG00000180398	MCFD2	F5F8D|F5F8D2|LMAN1IP|SDNSF	multiple coagulation factor deficiency 2	protein-coding
MACS_peak_290	chr12	125574784	125574978	+	56.20	NA	intron (NM_023928, intron 4 of 17)	(TCCA)n|Simple_repeat|Simple_repeat	24956	NM_023928	65985	Hs.656073	NM_023928	ENSG00000081760	AACS	ACSF1|SUR-5	acetoacetyl-CoA synthetase	protein-coding
MACS_peak_1454	chr9	124555550	124555744	+	56.19	NA	Intergenic	HERVH-int|LTR|ERV1	50583	NM_138709	153090	Hs.522378	NM_032552	ENSG00000136848	DAB2IP	AF9Q34|AIP-1|AIP1|DIP1/2	DAB2 interacting protein	protein-coding
MACS_peak_260	chr12	104953790	104954017	+	56.19	NA	intron (NM_018413, intron 1 of 2)	L2a|LINE|L2	-31508	NR_037487	100500843		NR_037487	ENSG00000264295	MIR3922	-	microRNA 3922	ncRNA
MACS_peak_521	chr16	30798452	30798702	+	56.16	NA	promoter-TSS (NM_001080417)	promoter-TSS (NM_001080417)	-54	NM_001080417	23361	Hs.301094	NM_001080417	ENSG00000102870	ZNF629	ZNF|ZNF65	zinc finger protein 629	protein-coding
MACS_peak_1010	chr3	61892143	61892650	+	56.06	NA	intron (NM_002841, intron 2 of 29)	AluJb|SINE|Alu	345153	NM_002841	5793	Hs.595541	NM_002841	ENSG00000144724	PTPRG	HPTPG|PTPG|R-PTP-GAMMA|RPTPG	protein tyrosine phosphatase, receptor type, G	protein-coding
MACS_peak_1351	chr8	84312633	84312847	+	56.02	NA	Intergenic	Charlie2a|DNA|hAT-Charlie	-3253	NR_122034	103352670	Hs.399852	NR_122034	ENSG00000253898	LINC01419	LVCAT7|TCONS_00014497	long intergenic non-protein coding RNA 1419	ncRNA
MACS_peak_1056	chr3	195487336	195487493	+	56.00	NA	intron (NM_138297, intron 14 of 22)	intron (NM_138297, intron 14 of 22)	39661	NM_020790	200958	Hs.308992	NM_020790	ENSG00000176945	MUC20	MUC-20	mucin 20, cell surface associated	protein-coding
MACS_peak_26	chr1	18187497	18187692	+	56.00	NA	Intergenic	(TCCA)n|Simple_repeat|Simple_repeat	105786	NM_030812	81569	Hs.2149	NM_030812	ENSG00000117148	ACTL8	CT57	actin-like 8	protein-coding
MACS_peak_578	chr16	88489641	88489836	+	55.98	NA	Intergenic	Intergenic	-4141	NM_001127464	84627	Hs.54925	NM_001127464	ENSG00000225614	ZNF469	BCS|BCS1	zinc finger protein 469	protein-coding
MACS_peak_1025	chr3	119225472	119225678	+	55.95	NA	intron (NM_016589, intron 4 of 6)	intron (NM_016589, intron 4 of 6)	8207	NM_016589	51300	Hs.477287	NM_016589		TIMMDC1	C3orf1	translocase of inner mitochondrial membrane domain containing 1	protein-coding
MACS_peak_1337	chr7	158387811	158388023	+	55.83	NA	Intergenic	HAL1-2a_MD|LINE|L1	3609	NR_049893	100847032		NR_049893	ENSG00000265598	MIR5707	-	microRNA 5707	ncRNA
MACS_peak_1255	chr7	482569	482849	+	55.83	NA	Intergenic	(TGGA)n|Simple_repeat|Simple_repeat	63318	NR_033960	442497	Hs.704269	NR_033960	ENSG00000249574	LOC442497	-	uncharacterized LOC442497	ncRNA
MACS_peak_1253	chr7	179631	179911	+	55.83	NA	Intergenic	L2b|LINE|L2	-13198	NM_020223	56975	Hs.134742	NM_020223	ENSG00000177706	FAM20C	DMP-4|DMP4|GEF-CK|RNS	family with sequence similarity 20, member C	protein-coding
MACS_peak_684	chr19	5673754	5674034	+	55.83	NA	Intergenic	(TCCA)n|Simple_repeat|Simple_repeat	-6882	NM_198533	374875	Hs.631840	NM_198533	ENSG00000167733	HSD11B1L	11-DH3|11-beta-HSD3|HSD3|SCDR10|SCDR10B|SDR26C2	hydroxysteroid (11-beta) dehydrogenase 1-like	protein-coding
MACS_peak_1359	chr8	101964669	101965074	+	55.82	NA	promoter-TSS (NM_145690)	promoter-TSS (NM_145690)	350	NM_001135699	7534	Hs.492407	NM_003406	ENSG00000164924	YWHAZ	14-3-3-zeta|HEL-S-3|HEL-S-93|HEL4|KCIP-1|YWHAD	tyrosine 3-monooxygenase/tryptophan 5-monooxygenase activation protein, zeta	protein-coding
MACS_peak_257	chr12	96048318	96048531	+	55.79	NA	intron (NR_077225, intron 1 of 4)	HAL1-2a_MD|LINE|L1	5393	NR_077225	100132594	Hs.676211	NR_077225	ENSG00000257150	PGAM1P5	-	phosphoglycerate mutase 1 pseudogene 5	pseudo
MACS_peak_1037	chr3	143461510	143461706	+	55.79	NA	intron (NM_173653, intron 4 of 15)	L1MC3|LINE|L1	105765	NM_173653	285195	Hs.302257	NM_173653	ENSG00000181804	SLC9A9	AUTS16|NHE9	solute carrier family 9, subfamily A (NHE9, cation proton antiporter 9), member 9	protein-coding
MACS_peak_33	chr1	25323570	25323766	+	55.79	NA	Intergenic	(GGTTG)n|Simple_repeat|Simple_repeat	-26326	NR_039623	100616365		NR_039623	ENSG00000264371	MIR4425	-	microRNA 4425	ncRNA
MACS_peak_133	chr10	31863242	31863384	+	55.77	NA	Intergenic	Intergenic	253249	NM_001174094	6935	Hs.124503	NM_030751	ENSG00000148516	ZEB1	AREB6|BZP|DELTAEF1|FECD6|NIL2A|PPCD3|TCF8|ZFHEP|ZFHX1A	zinc finger E-box binding homeobox 1	protein-coding
MACS_peak_857	chr20	43392884	43393042	+	55.76	NA	intron (NM_182970, intron 2 of 5)	Tigger9b|DNA|TcMar-Tigger	-18095	NR_132377	106144538	Hs.255479	NR_132377		KCNK15-AS1	-	KCNK15 antisense RNA 1 (head to head)	ncRNA
MACS_peak_814	chr2	168940571	168940729	+	55.76	NA	intron (NM_013233, intron 10 of 17)	intron (NM_013233, intron 10 of 17)	-142996	NR_131227	105616981	Hs.512811	NR_131227		LOC105616981	-	uncharacterized LOC105616981	ncRNA
MACS_peak_882	chr20	50802279	50802490	+	55.76	NA	intron (NM_018197, intron 2 of 5)	AluSq10|SINE|Alu	6140	NM_199426	55734	Hs.473082	NM_018197	ENSG00000020256	ZFP64	ZNF338	ZFP64 zinc finger protein	protein-coding
MACS_peak_720	chr19	47840226	47840463	+	55.76	NA	promoter-TSS (NM_018485)	promoter-TSS (NM_018485)	82	NM_018485	27202	Hs.534412	NM_018485	ENSG00000134830	C5AR2	C5L2|GPF77|GPR77	complement component 5a receptor 2	protein-coding
MACS_peak_1039	chr3	145833417	145833753	+	55.74	NA	intron (NM_000935, intron 3 of 18)	MER58A|DNA|hAT-Charlie	45697	NM_000935	5352	Hs.477866	NM_000935	ENSG00000152952	PLOD2	BRKS2|LH2|TLH	procollagen-lysine, 2-oxoglutarate 5-dioxygenase 2	protein-coding
MACS_peak_59	chr1	147931207	147931530	+	55.69	NA	intron (NR_102404, intron 17 of 18).2	CpG	24051	NM_001135789	653598	Hs.534674	NM_001135789		PPIAL4C	COAS-2	peptidylprolyl isomerase A (cyclophilin A)-like 4C	protein-coding
MACS_peak_271	chr12	116733183	116733488	+	55.68	NA	Intergenic	(TGGA)n|Simple_repeat|Simple_repeat	-18344	NM_015335	23389	Hs.603766	NM_015335	ENSG00000123066	MED13L	PROSIT240|THRAP2|TRAP240L	mediator complex subunit 13-like	protein-coding
MACS_peak_63	chr1	149858887	149859307	+	55.67	NA	promoter-TSS (NM_003528)	promoter-TSS (NM_003528)	369	NM_175065	317772	Hs.664173	NM_175065	ENSG00000184270	HIST2H2AB	H2AB	histone cluster 2, H2ab	protein-coding
MACS_peak_1524	chrX	6540000	6540087	+	55.59	NA	Intergenic	(GGAA)n|Simple_repeat|Simple_repeat	-86884	NM_016379	51481	Hs.170076	NM_016379	ENSG00000169059	VCX3A	VCX-8r|VCX-A|VCX3|VCX8R|VCXA	variable charge, X-linked 3A	protein-coding
MACS_peak_1330	chr7	155844857	155845054	+	55.58	NA	Intergenic	(TCCA)n|Simple_repeat|Simple_repeat	89629	NM_001291913	389602	Hs.583071	NM_001291913		LOC389602	-	uncharacterized LOC389602	protein-coding
MACS_peak_181	chr11	64362695	64362892	+	55.58	NA	intron (NM_144585, intron 4 of 9)	(TGGA)n|Simple_repeat|Simple_repeat	4511	NM_001276327	116085	Hs.174424	NM_144585	ENSG00000197891	SLC22A12	OAT4L|RST|URAT1	solute carrier family 22 (organic anion/urate transporter), member 12	protein-coding
MACS_peak_683	chr19	5673496	5673693	+	55.58	NA	Intergenic	(CCCA)n|Simple_repeat|Simple_repeat	-7182	NM_198533	374875	Hs.631840	NM_198533	ENSG00000167733	HSD11B1L	11-DH3|11-beta-HSD3|HSD3|SCDR10|SCDR10B|SDR26C2	hydroxysteroid (11-beta) dehydrogenase 1-like	protein-coding
MACS_peak_692	chr19	17007907	17008104	+	55.56	NA	intron (NM_015692, intron 39 of 41)	CpG-13190	8179	NM_003950	9002	Hs.137574	NM_003950		F2RL3	PAR4	coagulation factor II (thrombin) receptor-like 3	protein-coding
MACS_peak_815	chr2	171634265	171634424	+	55.52	NA	non-coding (NR_110644, exon 5 of 5)	non-coding (NR_110644, exon 5 of 5)	-5952	NM_001289947	285141	Hs.443729	NM_001289947	ENSG00000204334	ERICH2	-	glutamate rich 2	protein-coding
MACS_peak_885	chr20	51040914	51041333	+	55.50	NA	Intergenic	Intergenic	-196254	NR_110038	101927700	Hs.434465	NR_110038	ENSG00000234948	LINC01524	-	long intergenic non-protein coding RNA 1524	ncRNA
MACS_peak_903	chr20	58391631	58392009	+	55.50	NA	intron (NM_001281507, intron 8 of 12)	(TGGA)n|Simple_repeat|Simple_repeat	95555	NM_183244	116154	Hs.473218	NM_080672	ENSG00000087495	PHACTR3	C20orf101|H17739|PPP1R123|SCAPIN1|SCAPININ	phosphatase and actin regulator 3	protein-coding
MACS_peak_1514	chr9	141054339	141054612	+	55.49	NA	intron (NR_027156, intron 1 of 4)	L1MA2|LINE|L1	9910	NR_027156	643224	Hs.551805	NR_027156		TUBBP5	-	tubulin, beta pseudogene 5	pseudo
MACS_peak_507	chr16	24844640	24844855	+	55.38	NA	Intergenic	L2c|LINE|L2	-12437	NM_001258413	115584	Hs.164118	NM_052944	ENSG00000158865	SLC5A11	KST1|RKST1|SGLT6|SMIT2	solute carrier family 5 (sodium/inositol cotransporter), member 11	protein-coding
MACS_peak_1189	chr5	175464228	175464467	+	55.38	NA	Intergenic	REP522|Satellite|telo	24711	NR_103794	100996385	Hs.382347	NR_103794	ENSG00000248469	LOC100996385	-	uncharacterized LOC100996385	ncRNA
MACS_peak_139	chr10	82214770	82214968	+	55.38	NA	intron (NM_001128309, intron 1 of 5)	intron (NM_001128309, intron 1 of 5)	831	NM_001128309	81619	Hs.718943	NM_030927	ENSG00000108219	TSPAN14	DC-TM4F2|TM4SF14	tetraspanin 14	protein-coding
MACS_peak_77	chr1	200448683	200448900	+	55.38	NA	Intergenic	(CAGCC)n|Simple_repeat|Simple_repeat	-69605	NM_012482	23528	Hs.59757	NM_012482	ENSG00000162702	ZNF281	ZBP-99|ZNP-99	zinc finger protein 281	protein-coding
MACS_peak_16	chr1	10775916	10776114	+	55.38	NA	intron (NM_001079843, intron 2 of 20)	(CACCC)n|Simple_repeat|Simple_repeat	80718	NM_001079843	54897	Hs.439894	NM_017766	ENSG00000130940	CASZ1	CAS11|CST|SRG|ZNF693|dJ734G22.1	castor zinc finger 1	protein-coding
MACS_peak_68	chr1	152201039	152201263	+	55.36	NA	Intergenic	Intergenic	-4479	NM_001009931	388697	Hs.490162	NM_001009931	ENSG00000197915	HRNR	FLG3|S100A16|S100a18	hornerin	protein-coding
MACS_peak_779	chr2	91689738	91690265	+	55.30	NA	Intergenic	Intergenic	157974	NR_027238	654342	Hs.469287	NR_027238		LOC654342	-	lymphocyte-specific protein 1 pseudogene	pseudo
MACS_peak_41	chr1	45140496	45140656	+	55.29	NA	promoter-TSS (NM_001300748)	promoter-TSS (NM_001300748)	182	NM_001145636	339541	Hs.173679	NM_001004307	ENSG00000198520	C1orf228	NCRNA00082|p40	chromosome 1 open reading frame 228	protein-coding
MACS_peak_135	chr10	33643999	33644159	+	55.29	NA	Intergenic	L2a|LINE|L2	-20246	NM_001244973	8829	Hs.131704	NM_003873	ENSG00000099250	NRP1	BDCA4|CD304|NP1|NRP|VEGF165R	neuropilin 1	protein-coding
MACS_peak_520	chr16	29309690	29309910	+	55.26	NA	Intergenic	(TGGA)n|Simple_repeat|Simple_repeat	-3808	NR_002939	440352	Hs.658149	NR_002939		SNX29P2	RUNDC2C	sorting nexin 29 pseudogene 2	pseudo
MACS_peak_240	chr12	33272720	33272987	+	55.22	NA	Intergenic	L1MC4|LINE|L1	-223073	NM_001005242	5318	Hs.164384	NM_004572	ENSG00000057294	PKP2	ARVD9	plakophilin 2	protein-coding
MACS_peak_1022	chr3	101076458	101076637	+	55.15	NA	intron (NM_001282802, intron 10 of 22)	intron (NM_001282802, intron 10 of 22)	-37128	NM_016247	50939	Hs.209249	NM_016247	ENSG00000081148	IMPG2	IPM200|RP56|SPACRCAN|VMD5	interphotoreceptor matrix proteoglycan 2	protein-coding
MACS_peak_592	chr16	89918726	89918949	+	55.12	NA	intron (NM_032451, intron 3 of 14)	(CATCC)n|Simple_repeat|Simple_repeat	-21157	NM_014972	22980	Hs.415342	NM_014972	ENSG00000141002	TCF25	FKSG26|Hulp1|NULP1|PRO2620|hKIAA1049	transcription factor 25 (basic helix-loop-helix)	protein-coding
MACS_peak_411	chr15	64189142	64189303	+	55.05	NA	Intergenic	Intergenic	-26004	NR_029944	494334		NR_029944	ENSG00000199156	MIR422A	MIRN422A	microRNA 422a	ncRNA
MACS_peak_1125	chr5	2280214	2280375	+	55.05	NA	Intergenic	Intergenic	32021	NR_104616	100506858	Hs.445071	NR_104616		LOC100506858	-	uncharacterized LOC100506858	ncRNA
MACS_peak_52	chr1	116060395	116060651	+	55.04	NA	Intergenic	L1MA3|LINE|L1	-124051	NM_001172411	81839	Hs.515130	NM_138959	ENSG00000173218	VANGL1	KITENIN|LPP2|STB2|STBM2	VANGL planar cell polarity protein 1	protein-coding
MACS_peak_680	chr19	754840	755057	+	54.98	NA	intron (NM_173481, intron 1 of 4)	intron (NM_173481, intron 1 of 4)	3802	NM_173481	126353	Hs.439180	NM_173481	ENSG00000099812	MISP	C19orf21	mitotic spindle positioning	protein-coding
MACS_peak_462	chr16	1084028	1084228	+	54.97	NA	Intergenic	(TCCA)n|Simple_repeat|Simple_repeat	-38628	NM_001172560	6755	Hs.449840	NM_001053		SSTR5	SS-5-R	somatostatin receptor 5	protein-coding
MACS_peak_531	chr16	71929311	71929511	+	54.95	NA	promoter-TSS (NM_014761)	promoter-TSS (NM_014761)	15	NM_001270977	9798	Hs.232194	NM_014761	ENSG00000182149	IST1	OLC1	increased sodium tolerance 1 homolog (yeast)	protein-coding
MACS_peak_595	chr17	165052	165500	+	54.93	NA	intron (NM_006987, intron 5 of 9)	intron (NM_006987, intron 5 of 9)	-15720	NM_001242780	100506388	Hs.627744	NM_001242780	ENSG00000262061	LOC100506388	-	uncharacterized LOC100506388	protein-coding
MACS_peak_408	chr15	42259310	42259472	+	54.82	NA	intron (NM_139265, intron 1 of 5)	L2b|LINE|L2	5364	NM_139265	30844	Hs.143703	NM_139265		EHD4	PAST4	EH domain containing 4	protein-coding
MACS_peak_1438	chr9	108036198	108036447	+	54.80	NA	intron (NM_080546, intron 1 of 15)	intron (NM_080546, intron 1 of 15)	29428	NM_001286730	23446	Hs.573495	NM_022109	ENSG00000070214	SLC44A1	CD92|CDW92|CHTL1|CTL1	solute carrier family 44 (choline transporter), member 1	protein-coding
MACS_peak_1476	chr9	135882423	135882655	+	54.80	NA	Intergenic	(TGGA)n|Simple_repeat|Simple_repeat	-13278	NR_132981	106635684		NR_132981		SNORD141B	-	small nucleolar RNA, C/D box 141B	snoRNA
MACS_peak_998	chr3	13858279	13858538	+	54.80	NA	Intergenic	Intergenic	63210	NM_004625	7476	Hs.72290	NM_004625		WNT7A	-	wingless-type MMTV integration site family, member 7A	protein-coding
MACS_peak_1440	chr9	111009805	111009976	+	54.80	NA	Intergenic	(CACCC)n|Simple_repeat|Simple_repeat	608385	NM_006686	10880	Hs.534390	NM_006686		ACTL7B	Tact1	actin-like 7B	protein-coding
MACS_peak_1114	chr5	517929	518132	+	54.80	NA	intron (NM_001284351, intron 1 of 16)	(TCCA)n|Simple_repeat|Simple_repeat	6519	NM_004174	6550	Hs.658120	NM_004174	ENSG00000066230	SLC9A3	NHE3	solute carrier family 9, subfamily A (NHE3, cation proton antiporter 3), member 3	protein-coding
MACS_peak_1034	chr3	137906247	137906469	+	54.80	NA	5' UTR (NM_014154, exon 1 of 13)	5' UTR (NM_014154, exon 1 of 13)	268	NM_001267042	25852	Hs.744868	NM_014154	ENSG00000114098	ARMC8	GID5|HSPC056|S863-2|VID28	armadillo repeat containing 8	protein-coding
MACS_peak_352	chr14	77342408	77342632	+	54.80	NA	Intergenic	Intergenic	49795	NM_194287	145497	Hs.147276	NM_194287	ENSG00000100565	LRRC74A	C14orf166B|LRRC74	leucine rich repeat containing 74A	protein-coding
MACS_peak_1430	chr9	96433600	96433809	+	54.80	NA	intron (NM_005392, intron 17 of 21)	G-rich|Low_complexity|Low_complexity	76581	NR_049853	100847045		NR_049853		MIR548AU	-	microRNA 548au	ncRNA
MACS_peak_1246	chr6	152553346	152553607	+	54.80	NA	intron (NM_033071, intron 111 of 145)	intron (NM_033071, intron 111 of 145)	83714	NR_036121	100423029		NR_036121	ENSG00000266423	MIR3163	-	microRNA 3163	ncRNA
MACS_peak_832	chr2	238373292	238373575	+	54.80	NA	Intergenic	(TG)n|Simple_repeat|Simple_repeat	-21620	NM_001281474	79083	Hs.102406	NM_024101	ENSG00000115648	MLPH	SLAC2-A	melanophilin	protein-coding
MACS_peak_1441	chr9	111010359	111010557	+	54.80	NA	Intergenic	(CACAC)n|Simple_repeat|Simple_repeat	607817	NM_006686	10880	Hs.534390	NM_006686		ACTL7B	Tact1	actin-like 7B	protein-coding
MACS_peak_800	chr2	130012666	130012940	+	54.80	NA	intron (NR_122040, intron 1 of 4)	(CCCA)n|Simple_repeat|Simple_repeat	18661	NR_122041	151121	Hs.531687	NM_001033657	ENSG00000204460	LOC151121	-	uncharacterized LOC151121	ncRNA
MACS_peak_10	chr1	3418481	3418747	+	54.80	NA	intron (NM_001409, intron 17 of 36)	intron (NM_001409, intron 17 of 36)	47467	NM_014448	27237	Hs.87435	NM_014448	ENSG00000130762	ARHGEF16	GEF16|NBR	Rho guanine nucleotide exchange factor 16	protein-coding
MACS_peak_781	chr2	97554490	97554702	+	54.80	NA	intron (NM_016490, intron 2 of 4)	intron (NM_016490, intron 2 of 4)	6303	NM_001172667	51252	Hs.107922	NM_016490	ENSG00000168754	FAM178B	-	family with sequence similarity 178, member B	protein-coding
MACS_peak_107	chr10	2274424	2274625	+	54.77	NA	Intergenic	Intergenic	82744	NR_038884	399708	Hs.521270	NR_038884		LINC00701	-	long intergenic non-protein coding RNA 701	ncRNA
MACS_peak_610	chr17	19093160	19093361	+	54.77	NA	Intergenic	CpG	-29435	NM_001291904	79999	Hs.677375	NM_024934		LOC79999	-	uncharacterized LOC79999	protein-coding
MACS_peak_810	chr2	156059781	156059983	+	54.73	NA	Intergenic	Intergenic	504789	NM_001260509	3760	Hs.591606	NM_002239	ENSG00000162989	KCNJ3	GIRK1|KGA|KIR3.1	potassium channel, inwardly rectifying subfamily J, member 3	protein-coding
MACS_peak_227	chr11	118780701	118780861	+	54.72	NA	promoter-TSS (NR_039713)	promoter-TSS (NR_039713)	-636	NR_039713	100616376		NR_039713	ENSG00000264211	MIR4492	mir-4492	microRNA 4492	ncRNA
MACS_peak_90	chr1	228758606	228759055	+	54.64	NA	TTS (NR_106988).7	TTS (NR_106988).7	663	NR_106988	102465753		NR_106988		MIR7641-2	B-ATF|hsa-mir-7641-2	microRNA 7641-2	ncRNA
MACS_peak_1277	chr7	2559266	2559459	+	54.62	NA	promoter-TSS (NM_001040168)	promoter-TSS (NM_001040168)	-117	NM_001040167	3955	Hs.159142	NM_002304	ENSG00000106003	LFNG	SCDO3	LFNG O-fucosylpeptide 3-beta-N-acetylglucosaminyltransferase	protein-coding
MACS_peak_816	chr2	174202573	174202736	+	54.59	NA	Intergenic	Intergenic	-16907	NM_031942	83879	Hs.470654	NM_031942	ENSG00000144354	CDCA7	JPO1	cell division cycle associated 7	protein-coding
MACS_peak_70	chr1	161059199	161059418	+	54.58	NA	promoter-TSS (NM_030916)	promoter-TSS (NM_030916)	77	NM_030916	81607	Hs.492490	NM_030916	ENSG00000143217	PVRL4	EDSS1|LNIR|PRR4|nectin-4	poliovirus receptor-related 4	protein-coding
MACS_peak_159	chr10	134989143	134989345	+	54.57	NA	intron (NM_152643, intron 3 of 29)	(TGGA)n|Simple_repeat|Simple_repeat	15273	NM_152643	85442	Hs.530685	NM_152643	ENSG00000171798	KNDC1	C10orf23|RASGEF2|bB439H18.3	kinase non-catalytic C-lobe domain (KIND) containing 1	protein-coding
MACS_peak_65	chr1	151707053	151707406	+	54.57	NA	Intergenic	L2|LINE|L2	13216	NM_001144956	284485	Hs.297967	NM_001144956	ENSG00000178796	RIIAD1	C1orf230|NCRNA00166	regulatory subunit of type II PKA R-subunit (RIIa) domain containing 1	protein-coding
MACS_peak_1324	chr7	137314372	137314616	+	54.50	NA	intron (NM_004717, intron 6 of 33)	intron (NM_004717, intron 6 of 33)	217115	NM_004717	9162	Hs.242947	NM_004717	ENSG00000157680	DGKI	DGK-IOTA	diacylglycerol kinase, iota	protein-coding
MACS_peak_175	chr11	47429939	47430237	+	54.48	NA	promoter-TSS (NM_001128225)	promoter-TSS (NM_001128225)	42	NM_001128225	91252	Hs.523664	NM_152264	ENSG00000165915	SLC39A13	-	solute carrier family 39 (zinc transporter), member 13	protein-coding
MACS_peak_71	chr1	167021786	167021933	+	54.47	NA	TTS (NM_005814)	TTS (NM_005814)	38009	NM_005814	10223	Hs.651244	NM_005814	ENSG00000143167	GPA33	A33	glycoprotein A33 (transmembrane)	protein-coding
MACS_peak_945	chr21	41696430	41696756	+	54.47	NA	intron (NR_073202, intron 8 of 32)	intron (NR_073202, intron 8 of 32)	-58417	NR_038898	100506492	Hs.667053	NR_038896	ENSG00000235123	DSCAM-AS1	M41	DSCAM antisense RNA 1	ncRNA
MACS_peak_151	chr10	129595653	129595925	+	54.47	NA	Intergenic	(TCCA)n|Simple_repeat|Simple_repeat	60251	NM_207426	399823	Hs.449674	NM_207426	ENSG00000186766	FOXI2	-	forkhead box I2	protein-coding
MACS_peak_86	chr1	206698347	206698677	+	54.39	NA	intron (NM_182664, intron 1 of 4)	intron (NM_182664, intron 1 of 4)	17649	NM_182663	83593	Hs.497579	NM_031437	ENSG00000266094	RASSF5	Maxp1|NORE1|NORE1A|NORE1B|RAPL|RASSF3	Ras association (RalGDS/AF-6) domain family member 5	protein-coding
MACS_peak_585	chr16	89021442	89021662	+	54.39	NA	intron (NM_005187, intron 1 of 11)	intron (NM_005187, intron 1 of 11)	-13944	NM_175931	863	Hs.513811	NM_005187	ENSG00000129993	CBFA2T3	ETO2|MTG16|MTGR2|ZMYND4	core-binding factor, runt domain, alpha subunit 2; translocated to, 3	protein-coding
MACS_peak_1004	chr3	20773941	20774105	+	54.36	NA	Intergenic	L1MA3|LINE|L1	390063	NR_110814	101927829	Hs.639381	NR_110814	ENSG00000231304	LOC101927829	-	uncharacterized LOC101927829	ncRNA
MACS_peak_947	chr21	41759830	41760386	+	54.36	NA	intron (NR_073202, intron 3 of 32)	L1MEd|LINE|L1	5097	NR_038899	100506492	Hs.667053	NR_038896	ENSG00000235123	DSCAM-AS1	M41	DSCAM antisense RNA 1	ncRNA
MACS_peak_1309	chr7	101199907	101200053	+	54.35	NA	intron (NM_001278563, intron 12 of 12)	(TGGA)n|Simple_repeat|Simple_repeat	12306	NR_103748	100506527	Hs.535863	NR_103747	ENSG00000233123	LINC01007	-	long intergenic non-protein coding RNA 1007	ncRNA
MACS_peak_840	chr20	7087547	7087750	+	54.35	NA	Intergenic	L1ME3|LINE|L1	147201	NR_110609	101929265	Hs.637730	NR_110609	ENSG00000228888	LINC01428	-	long intergenic non-protein coding RNA 1428	ncRNA
MACS_peak_43	chr1	55098029	55098274	+	54.33	NA	intron (NM_015547, intron 16 of 16)	HERVK9-int|LTR|ERVK	-8951	NM_176782	338094	Hs.234786	NM_176782	ENSG00000162391	FAM151A	C1orf179	family with sequence similarity 151, member A	protein-coding
MACS_peak_376	chr14	102179892	102180137	+	54.33	NA	Intergenic	(CACCT)n|Simple_repeat|Simple_repeat	-16760	NR_026774	145200	Hs.150840	NR_026774	ENSG00000258512	LINC00239	C14orf72|NCRNA00239	long intergenic non-protein coding RNA 239	ncRNA
MACS_peak_122	chr10	8096574	8096733	+	54.27	NA	promoter-TSS (NM_002051)	promoter-TSS (NM_002051)	-14	NM_002051	2625	Hs.524134	NM_002051	ENSG00000107485	GATA3	HDR|HDRS	GATA binding protein 3	protein-coding
MACS_peak_288	chr12	124359099	124359303	+	54.17	NA	intron (NM_207437, intron 45 of 77)	intron (NM_207437, intron 45 of 77)	97436	NM_001304959	80212	Hs.114111	NM_025140	ENSG00000119242	CCDC92	-	coiled-coil domain containing 92	protein-coding
MACS_peak_1217	chr6	14733337	14733541	+	54.17	NA	Intergenic	Intergenic	-447754	NR_108096	102216342	Hs.563409	NR_108096	ENSG00000226673	LINC01108	LncRNA-ES1	long intergenic non-protein coding RNA 1108	ncRNA
MACS_peak_98	chr10	978453	978654	+	54.15	NA	promoter-TSS (NR_120629)	promoter-TSS (NR_120629)	-413	NR_120629	101927762	Hs.151159	NR_120629	ENSG00000229869	LOC101927762	-	uncharacterized LOC101927762	ncRNA
MACS_peak_326	chr13	26729505	26729709	+	54.15	NA	intron (NM_183045, intron 5 of 5)	intron (NM_183045, intron 5 of 5)	66287	NM_183044	6049	Hs.136885	NM_005977	ENSG00000127870	RNF6	-	ring finger protein (C3H2C3 type) 6	protein-coding
MACS_peak_1198	chr5	177672554	177672719	+	54.14	NA	intron (NM_173465, intron 25 of 28)	(TCCA)n|Simple_repeat|Simple_repeat	-12813	NR_103509	85007	Hs.248746	NM_153373	ENSG00000175309	PHYKPL	AGXT2L2|PHLU	5-phosphohydroxy-L-lysine phospho-lyase	protein-coding
MACS_peak_417	chr15	73026650	73026886	+	54.04	NA	intron (NR_045565, intron 13 of 16)	intron (NR_045565, intron 13 of 16)	48248	NR_045566	585	Hs.208681	NM_033028	ENSG00000140463	BBS4	-	Bardet-Biedl syndrome 4	protein-coding
MACS_peak_1160	chr5	128640326	128640510	+	54.04	NA	Intergenic	LTR10A|LTR|ERV1	92422	NR_039665	100616325		NR_039665	ENSG00000265691	MIR4460	-	microRNA 4460	ncRNA
MACS_peak_331	chr13	36805512	36805717	+	53.97	NA	intron (NM_001144985, intron 6 of 6)	intron (NM_001144985, intron 6 of 6)	-16862	NM_017826	54937	Hs.124519	NM_017826	ENSG00000120669	SOHLH2	SPATA28|TEB1|bHLHe81	spermatogenesis and oogenesis specific basic helix-loop-helix 2	protein-coding
MACS_peak_8	chr1	2968554	2968759	+	53.97	NA	Intergenic	(TCCA)n|Simple_repeat|Simple_repeat	15633	NR_024371	440556	Hs.531041	NM_198543	ENSG00000177133	LINC00982	-	long intergenic non-protein coding RNA 982	ncRNA
MACS_peak_1487	chr9	137260504	137260683	+	53.95	NA	intron (NM_002957, intron 1 of 9)	intron (NM_002957, intron 1 of 9)	-10548	NM_001291920	6256	Hs.590886	NM_002957		RXRA	NR2B1	retinoid X receptor alpha	protein-coding
MACS_peak_808	chr2	152875844	152876078	+	53.92	NA	intron (NM_000726, intron 2 of 13)	intron (NM_000726, intron 2 of 13)	-45476	NM_001005747	785	Hs.120725	NM_000726	ENSG00000182389	CACNB4	CAB4|CACNLB4|EA5|EIG9|EJM|EJM4|EJM6	calcium channel, voltage-dependent, beta 4 subunit	protein-coding
MACS_peak_399	chr15	22501616	22501782	+	53.91	NA	Intergenic	(TGGA)n|Simple_repeat|Simple_repeat	11581	NR_031672	100302233		NR_031672	ENSG00000221641	MIR1268A	MIR1268|MIRN1268|hsa-mir-1268|hsa-mir-1268a	microRNA 1268a	ncRNA
MACS_peak_1279	chr7	21654285	21654451	+	53.91	NA	intron (NM_001277115, intron 20 of 81)	intron (NM_001277115, intron 20 of 81)	71535	NM_001277115	8701	Hs.520245	NM_001277115	ENSG00000105877	DNAH11	CILD7|DNAHBL|DNAHC11|DNHBL|DPL11	dynein, axonemal, heavy chain 11	protein-coding
MACS_peak_429	chr15	84865018	84865184	+	53.89	NA	intron (NR_033738, intron 3 of 7)	intron (NR_033738, intron 3 of 7)	4340	NR_049748	642423	Hs.681665	NR_049748		LOC642423	-	golgin A2 pseudogene	pseudo
MACS_peak_242	chr12	42027555	42027721	+	53.89	NA	Intergenic	Intergenic	196097	NM_013377	29951	Hs.380044	NM_013377	ENSG00000165966	PDZRN4	LNX4|SAMCAP3L	PDZ domain containing ring finger 4	protein-coding
MACS_peak_1308	chr7	100487819	100488073	+	53.84	NA	promoter-TSS (NM_001015072)	promoter-TSS (NM_001015072)	-607	NM_001015072	402682	Hs.534845	NM_001015072	ENSG00000176125	UFSP1	UFSP	UFM1-specific peptidase 1 (inactive)	protein-coding
MACS_peak_1465	chr9	132565322	132565541	+	53.82	NA	promoter-TSS (NM_014506)	promoter-TSS (NM_014506)	-1	NM_014506	27348	Hs.252682	NM_014506	ENSG00000136816	TOR1B	DQ1	torsin family 1, member B (torsin B)	protein-coding
MACS_peak_449	chr15	101718881	101719133	+	53.82	NA	exon (NM_014918, exon 3 of 3)	exon (NM_014918, exon 3 of 3)	73130	NM_014918	22856	Hs.110488	NM_014918	ENSG00000131873	CHSY1	CHSY|CSS1|ChSy-1|TPBS	chondroitin sulfate synthase 1	protein-coding
MACS_peak_1297	chr7	92460224	92460423	+	53.80	NA	intron (NM_001145306, intron 2 of 7)	MIRc|SINE|MIR	2908	NM_001259	1021	Hs.119882	NM_001259	ENSG00000105810	CDK6	MCPH12|PLSTIRE	cyclin-dependent kinase 6	protein-coding
MACS_peak_1080	chr4	3544354	3544560	+	53.78	NA	Intergenic	(TGGA)n|Simple_repeat|Simple_repeat	-10233	NM_002337	4043	Hs.40966	NM_002337		LRPAP1	A2MRAP|A2RAP|HBP44|MRAP|MYP23|RAP|alpha-2-MRAP	LDL receptor related protein associated protein 1	protein-coding
MACS_peak_1155	chr5	124931684	124931890	+	53.78	NA	intron (NR_109887, intron 3 of 3)	LTR82B|LTR|ERVL	102833	NR_109887	101927460	Hs.407582	NR_109887	ENSG00000260192	LOC101927460	-	uncharacterized LOC101927460	ncRNA
MACS_peak_895	chr20	56601915	56602466	+	53.76	NA	Intergenic	Intergenic	-123793	NM_178456	128602	Hs.43977	NM_178456	ENSG00000124237	C20orf85	LLC1|bA196N14.1	chromosome 20 open reading frame 85	protein-coding
MACS_peak_688	chr19	14047850	14048056	+	53.76	NA	intron (NM_024825, intron 2 of 7)	intron (NM_024825, intron 2 of 7)	1336	NM_024825	79883	Hs.448497	NM_024825	ENSG00000132000	PODNL1	SLRR5B	podocan-like 1	protein-coding
MACS_peak_1047	chr3	169962753	169962986	+	53.75	NA	intron (NM_002740, intron 2 of 17)	LTR29|LTR|ERV1	22649	NM_002740	5584	Hs.478199	NM_002740	ENSG00000163558	PRKCI	DXS1179E|PKCI|nPKC-iota	protein kinase C, iota	protein-coding
MACS_peak_345	chr14	68000642	68000789	+	53.73	NA	intron (NM_020715, intron 1 of 28)	intron (NM_020715, intron 1 of 28)	707	NM_020715	57475	Hs.594236	NM_020715	ENSG00000054690	PLEKHH1	-	pleckstrin homology domain containing, family H (with MyTH4 domain) member 1	protein-coding
MACS_peak_819	chr2	187552669	187552819	+	53.72	NA	Intergenic	LOR1a|LTR|ERV1	-6045	NM_177454	165215	Hs.28872	NM_177454	ENSG00000144369	FAM171B	KIAA1946	family with sequence similarity 171, member B	protein-coding
MACS_peak_500	chr16	19609352	19609569	+	53.70	NA	intron (NM_001300743, intron 8 of 27)	MIRb|SINE|MIR	42723	NM_020314	57020	Hs.654964	NM_020314	ENSG00000103544	C16orf62	-	chromosome 16 open reading frame 62	protein-coding
MACS_peak_95	chr10	573023	573190	+	53.67	NA	intron (NM_014974, intron 1 of 36)	intron (NM_014974, intron 1 of 36)	114612	NR_049884	100847086		NR_049884	ENSG00000263511	MIR5699	mir-5699	microRNA 5699	ncRNA
MACS_peak_714	chr19	41221501	41221750	+	53.63	NA	promoter-TSS (NM_001142555)	promoter-TSS (NM_001142555)	-614	NM_001142555	79934	Hs.130712	NM_024876	ENSG00000123815	ADCK4	NPHS9	aarF domain containing kinase 4	protein-coding
MACS_peak_1521	chrUn_gl000229	14376	14674	+	53.61	NA	NA	Intergenic	NA	NA
MACS_peak_1049	chr3	176584924	176585110	+	53.61	NA	Intergenic	L1PA5|LINE|L1	-50228	NR_110819	101928684	Hs.639352	NR_110819	ENSG00000228308	LINC01209	-	long intergenic non-protein coding RNA 1209	ncRNA
MACS_peak_458	chr16	964486	964799	+	53.61	NA	intron (NM_022773, intron 2 of 10)	intron (NM_022773, intron 2 of 10)	-6391	NR_110945	101929387	Hs.737087	NR_110945	ENSG00000260439	LMF1-AS1	LA16c-366D3.1	LMF1 antisense RNA 1	ncRNA
MACS_peak_235	chr12	4798666	4798873	+	53.58	NA	Intergenic	SVA_C|Other|Other	30499	NR_110112	101929549	Hs.663336	NR_110112	ENSG00000255474	LOC101929549	-	uncharacterized LOC101929549	ncRNA
MACS_peak_30	chr1	20600193	20600400	+	53.58	NA	Intergenic	(TGGA)n|Simple_repeat|Simple_repeat	-17116	NM_001039500	127731	Hs.205178	NM_144623	ENSG00000158816	VWA5B1	-	von Willebrand factor A domain containing 5B1	protein-coding
MACS_peak_1343	chr8	25172146	25172353	+	53.58	NA	intron (NM_024940, intron 13 of 51)	(TCCA)n|Simple_repeat|Simple_repeat	-30669	NR_106936	102465527		NR_106936	ENSG00000274988	MIR6876	hsa-mir-6876	microRNA 6876	ncRNA
MACS_peak_210	chr11	71150905	71151101	+	53.57	NA	intron (NM_001360, intron 6 of 8)	intron (NM_001360, intron 6 of 8)	8474	NM_001163817	1717	Hs.503134	NM_001360	ENSG00000172893	DHCR7	SLOS	7-dehydrocholesterol reductase	protein-coding
MACS_peak_146	chr10	112180724	112180931	+	53.56	NA	Intergenic	(TCCA)n|Simple_repeat|Simple_repeat	-76798	NM_004419	1847	Hs.2128	NM_004419	ENSG00000138166	DUSP5	DUSP|HVH3	dual specificity phosphatase 5	protein-coding
MACS_peak_1373	chr8	125290378	125290612	+	53.55	NA	Intergenic	L2b|LINE|L2	-30856	NR_125420	101927588	Hs.617072	NR_125420	ENSG00000214803	LOC101927588	-	uncharacterized LOC101927588	ncRNA
MACS_peak_722	chr19	49172492	49172711	+	53.52	NA	intron (NR_004401, intron 3 of 4)	(CCA)n|Simple_repeat|Simple_repeat	3737	NM_145807	126147	Hs.326217	NM_145807	ENSG00000142233	NTN5	-	netrin 5	protein-coding
MACS_peak_803	chr2	133109267	133109735	+	53.52	NA	Intergenic	(CCCTAA)n|Simple_repeat|Simple_repeat	44784	NM_001304449	646915		NM_001304449		ZNF806	-	zinc finger protein 806	protein-coding
MACS_peak_855	chr20	43250819	43250987	+	53.46	NA	intron (NM_000022, intron 9 of 11)	intron (NM_000022, intron 9 of 11)	29473	NM_000022	100	Hs.654536	NM_000022	ENSG00000196839	ADA	-	adenosine deaminase	protein-coding
MACS_peak_923	chr20	61617804	61618018	+	53.46	NA	Intergenic	(TGGG)n|Simple_repeat|Simple_repeat	20476	NM_080606	128408	Hs.551230	NM_080606	ENSG00000125533	BHLHE23	BETA4|BHLHB4|bA305P22.3	basic helix-loop-helix family, member e23	protein-coding
MACS_peak_1075	chr4	1267593	1267761	+	53.46	NA	Intergenic	Intergenic	-15962	NM_001297430	10296	Hs.139896	NM_005882	ENSG00000090316	MAEA	EMLP|EMP|GID9|HLC-10|PIG5	macrophage erythroblast attacher	protein-coding
MACS_peak_1074	chr4	698896	699137	+	53.44	NA	promoter-TSS (NM_006315)	promoter-TSS (NM_006315)	-557	NM_006315	10336	Hs.144309	NM_006315	ENSG00000185619	PCGF3	DONG1|RNF3|RNF3A	polycomb group ring finger 3	protein-coding
MACS_peak_1418	chr9	90647874	90648059	+	53.42	NA	Intergenic	Intergenic	-58271	NM_012119	23552	Hs.522274	NM_012119	ENSG00000156345	CDK20	CCRK|CDCH|P42|PNQALRE	cyclin-dependent kinase 20	protein-coding
MACS_peak_919	chr20	60935513	60935697	+	53.41	NA	intron (NM_005560, intron 2 of 79)	(TGGG)n|Simple_repeat|Simple_repeat	6763	NM_005560	3911	Hs.473256	NM_005560	ENSG00000130702	LAMA5	-	laminin, alpha 5	protein-coding
MACS_peak_696	chr19	18764265	18764473	+	53.39	NA	intron (NM_018316, intron 1 of 2)	(CCCA)n|Simple_repeat|Simple_repeat	16531	NM_018316	55295	Hs.250632	NM_018316		KLHL26	-	kelch-like family member 26	protein-coding
MACS_peak_1227	chr6	44752036	44752244	+	53.39	NA	Intergenic	MLT1F-int|LTR|ERVL-MaLR	348762	NR_039785	100616352		NR_039785	ENSG00000266619	MIR4642	-	microRNA 4642	ncRNA
MACS_peak_1300	chr7	97026809	97027017	+	53.39	NA	Intergenic	LTR50|LTR|ERVL	281008	NM_020186	57001	Hs.592269	NM_020186	ENSG00000196636	SDHAF3	ACN9|DC11|Sdh7	succinate dehydrogenase complex assembly factor 3	protein-coding
MACS_peak_1201	chr5	180045046	180045254	+	53.37	NA	intron (NM_182925, intron 21 of 29)	intron (NM_182925, intron 21 of 29)	-26663	NM_052863	92304	Hs.62492	NM_052863	ENSG00000161055	SCGB3A1	HIN-1|HIN1|LU105|PnSP-2|UGRP2	secretoglobin, family 3A, member 1	protein-coding
MACS_peak_1106	chr4	105817912	105818120	+	53.37	NA	Intergenic	Intergenic	-249016	NM_017628	54790	Hs.367639	NM_017628	ENSG00000168769	TET2	KIAA1546|MDS	tet methylcytosine dioxygenase 2	protein-coding
MACS_peak_485	chr16	9419425	9419646	+	53.33	NA	Intergenic	LTR16C|LTR|ERVL	90761	NR_036166	100422920		NR_036166	ENSG00000265841	MIR548X	-	microRNA 548x	ncRNA
MACS_peak_366	chr14	97226909	97227097	+	53.26	NA	Intergenic	(TGGA)n|Simple_repeat|Simple_repeat	-36681	NM_003384	7443	Hs.422662	NM_003384	ENSG00000100749	VRK1	PCH1|PCH1A	vaccinia related kinase 1	protein-coding
MACS_peak_1497	chr9	138080810	138080979	+	53.24	NA	Intergenic	(CACAC)n|Simple_repeat|Simple_repeat	7439	NR_046107	401557	Hs.640138	NR_046107		LOC401557	-	uncharacterized LOC401557	ncRNA
MACS_peak_1271	chr7	1618322	1618585	+	53.24	NA	intron (NR_027328, intron 3 of 3)	(TCCA)n|Simple_repeat|Simple_repeat	8744	NR_021487	114796	Hs.436146	NR_021487	ENSG00000230487	PSMG3-AS1	-	PSMG3 antisense RNA 1 (head to head)	ncRNA
MACS_peak_1415	chr9	23637611	23637780	+	53.24	NA	intron (NR_121602, intron 9 of 27)	L2c|LINE|L2	34702	NR_121602	101929563	Hs.533220	NR_121602		LOC101929563	-	uncharacterized LOC101929563	ncRNA
MACS_peak_1490	chr9	137442018	137442260	+	53.24	NA	Intergenic	(TGG)n|Simple_repeat|Simple_repeat	-91512	NM_001278074	1289	Hs.210283	NM_000093	ENSG00000130635	COL5A1	EDSC	collagen, type V, alpha 1	protein-coding
MACS_peak_797	chr2	128304463	128304744	+	53.24	NA	intron (NM_001080527, intron 1 of 46)	(TCCA)n|Simple_repeat|Simple_repeat	11225	NM_001080527	4648	Hs.154578	NM_001080527	ENSG00000169994	MYO7B	-	myosin VIIB	protein-coding
MACS_peak_377	chr14	103386227	103386492	+	53.24	NA	Intergenic	(TCCA)n|Simple_repeat|Simple_repeat	-2634	NM_030943	81693	Hs.534494	NM_030943	ENSG00000166126	AMN	PRO1028|amnionless	amnion associated transmembrane protein	protein-coding
MACS_peak_544	chr16	84153483	84153728	+	53.24	NA	Intergenic	Intergenic	-3057	NM_003791	8720	Hs.75890	NM_003791	ENSG00000140943	MBTPS1	PCSK8|S1P|SKI-1	membrane bound transcription factor peptidase, site 1	protein-coding
MACS_peak_207	chr11	71089953	71090208	+	53.24	NA	Intergenic	(TGGA)n|Simple_repeat|Simple_repeat	44320	NR_038862	399923	Hs.128191	NM_001001680	ENSG00000172900	FLJ42102	-	uncharacterized LOC399923	ncRNA
MACS_peak_837	chr2	242932642	242932811	+	53.24	NA	intron (NR_110220, intron 3 of 3)	(TCCA)n|Simple_repeat|Simple_repeat	19892	NR_110592	102723927	Hs.733585	NR_110592	ENSG00000237940	LOC102723927	-	uncharacterized LOC102723927	ncRNA
MACS_peak_186	chr11	68120188	68120499	+	53.24	NA	intron (NM_002335, intron 2 of 22)	intron (NM_002335, intron 2 of 22)	40266	NM_002335	4041	Hs.6347	NM_002335	ENSG00000162337	LRP5	BMND1|EVR1|EVR4|HBM|LR3|LRP-5|LRP7|OPPG|OPS|OPTA1|VBCH2	LDL receptor related protein 5	protein-coding
MACS_peak_1522	chrX	3442800	3442952	+	53.23	NA	Intergenic	HAL1-2a_MD|LINE|L1	-134652	NR_046643	100873944		NR_046643	ENSG00000236188	PRKX-AS1	-	PRKX antisense RNA 1	ncRNA
MACS_peak_218	chr11	76499725	76499968	+	53.23	NA	intron (NM_015516, intron 1 of 1)	intron (NM_015516, intron 1 of 1)	5561	NM_015516	25987	Hs.8361	NM_015516	ENSG00000182704	TSKU	E2IG4|LRRC54|TSK	tsukushi, small leucine rich proteoglycan	protein-coding
MACS_peak_806	chr2	138968118	138968327	+	53.19	NA	Intergenic	Intergenic	246414	NM_001024075	3176	Hs.42151	NM_006895	ENSG00000150540	HNMT	HMT|HNMT-S1|HNMT-S2	histamine N-methyltransferase	protein-coding
MACS_peak_744	chr2	1571202	1571411	+	53.19	NA	Intergenic	Intergenic	153126	NM_175721	7173	Hs.467554	NM_000547	ENSG00000115705	TPO	MSA|TDH2A|TPX	thyroid peroxidase	protein-coding
MACS_peak_250	chr12	53584210	53584367	+	53.16	NA	TTS (NM_000889)	TTS (NM_000889)	-9595	NM_001244705	51380	Hs.279815	NM_015989	ENSG00000139631	CSAD	CSD|PCAP	cysteine sulfinic acid decarboxylase	protein-coding
MACS_peak_1424	chr9	95750788	95751048	+	53.12	NA	intron (NM_001286993, intron 3 of 17)	LTR47B|LTR|ERVL	14200	NM_033086	89846	Hs.411081	NM_033086	ENSG00000127084	FGD3	ZFYVE5	FYVE, RhoGEF and PH domain containing 3	protein-coding
MACS_peak_389	chr14	105767008	105767214	+	53.09	NA	promoter-TSS (NM_001243127)	promoter-TSS (NM_001243127)	-37	NM_001243127	23241	Hs.525626	NM_015197	ENSG00000179364	PACS2	PACS-2|PACS1L	phosphofurin acidic cluster sorting protein 2	protein-coding
MACS_peak_339	chr14	28841671	28841889	+	53.08	NA	Intergenic	L1MC4|LINE|L1	392745	NR_125758	103695363	Hs.569360	NR_125758		FOXG1-AS1	FOXG1-AS	FOXG1 antisense RNA 1 (head to head)	ncRNA
MACS_peak_1215	chr6	12013052	12013286	+	53.05	NA	intron (NM_002114, intron 1 of 8)	CpG	445	NM_002114	3096	Hs.567284	NM_002114	ENSG00000095951	HIVEP1	CIRIP|CRYBP1|GAAP|MBP-1|PRDII-BF1|Schnurri-1|ZAS1|ZNF40|ZNF40A	human immunodeficiency virus type I enhancer binding protein 1	protein-coding
MACS_peak_69	chr1	153513039	153513209	+	53.02	NA	intron (NM_002962, intron 2 of 3)	intron (NM_002962, intron 2 of 3)	1117	NM_002962	6276	Hs.2960	NM_002962	ENSG00000196420	S100A5	S100D	S100 calcium binding protein A5	protein-coding
MACS_peak_770	chr2	56778023	56778193	+	53.02	NA	Intergenic	Intergenic	-365203	NR_125368	100129434	Hs.580330	NR_125368		LOC100129434	-	uncharacterized LOC100129434	ncRNA
MACS_peak_637	chr17	61920002	61920551	+	53.02	NA	promoter-TSS (NM_001098426)	promoter-TSS (NM_001098426)	75	NM_001098426	6603	Hs.250581	NM_003077	ENSG00000108604	SMARCD2	BAF60B|CRACD2|PRO2451|Rsc6p	SWI/SNF related, matrix associated, actin dependent regulator of chromatin, subfamily d, member 2	protein-coding
MACS_peak_1026	chr3	123126529	123126699	+	53.02	NA	intron (NM_183357, intron 1 of 20)	AluJo|SINE|Alu	8575	NM_001199642	111	Hs.593292	NM_183357	ENSG00000173175	ADCY5	AC5|FDFM	adenylate cyclase 5	protein-coding
MACS_peak_1098	chr4	17578767	17578937	+	53.02	NA	promoter-TSS (NM_015907)	promoter-TSS (NM_015907)	-75	NM_015907	51056	Hs.570791	NM_015907	ENSG00000002549	LAP3	HEL-S-106|LAP|LAPEP|PEPS	leucine aminopeptidase 3	protein-coding
MACS_peak_1084	chr4	3816618	3816863	+	53.01	NA	Intergenic	(CTACT)n|Simple_repeat|Simple_repeat	48444	NM_000683	152	Hs.123022	NM_000683	ENSG00000184160	ADRA2C	ADRA2L2|ADRA2RL2|ADRARL2|ALPHA2CAR	adrenoceptor alpha 2C	protein-coding
MACS_peak_192	chr11	69312474	69312818	+	53.01	NA	Intergenic	Intergenic	12317	NR_120545	101928292	Hs.736219	NR_120542		LINC01488	BRCAT8	long intergenic non-protein coding RNA 1488	ncRNA
MACS_peak_161	chr10	135380141	135380351	+	53.00	NA	TTS (NR_033789)	TTS (NR_033789)	-1108	NM_001143763	93426	Hs.553795	NM_130784	ENSG00000171772	SYCE1	C10orf94|CT76	synaptonemal complex central element protein 1	protein-coding
MACS_peak_1344	chr8	33898248	33898458	+	53.00	NA	Intergenic	(CCCA)n|Simple_repeat|Simple_repeat	-440729	NM_024025	78986	Hs.8719	NM_024025	ENSG00000133878	DUSP26	DSP-4|DUSP24|LDP-4|MKP-8|MKP8|NATA1|NEAP|SKRP3	dual specificity phosphatase 26 (putative)	protein-coding
MACS_peak_442	chr15	98960507	98960698	+	52.99	NA	Intergenic	MER74A|LTR|ERVL	97009	NM_182562	283777	Hs.668070	NM_182562	ENSG00000185087	FAM169B	-	family with sequence similarity 169, member B	protein-coding
MACS_peak_1017	chr3	90333534	90333899	+	52.96	NA	Intergenic	ALR/Alpha|Satellite|centr	1177042	NM_182644	2042	Hs.123642	NM_005233	ENSG00000044524	EPHA3	EK4|ETK|ETK1|HEK|HEK4|TYRO4	EPH receptor A3	protein-coding
MACS_peak_1220	chr6	23502583	23502772	+	52.96	NA	Intergenic	Tigger1|DNA|TcMar-Tigger	-623737	NM_080723	140767	Hs.726270	NM_080723	ENSG00000152954	NRSN1	VMP|p24	neurensin 1	protein-coding
MACS_peak_274	chr12	117226575	117226828	+	52.94	NA	intron (NM_032814, intron 7 of 10)	(TGGA)n|Simple_repeat|Simple_repeat	50605	NM_001109903	84900	Hs.437195	NM_032814	ENSG00000135119	RNFT2	TMEM118	ring finger protein, transmembrane 2	protein-coding
MACS_peak_273	chr12	117033377	117033583	+	52.94	NA	Intergenic	(TGGA)n|Simple_repeat|Simple_repeat	36294	NM_001085481	643246	Hs.506947	NM_001085481		MAP1LC3B2	ATG8G	microtubule-associated protein 1 light chain 3 beta 2	protein-coding
MACS_peak_876	chr20	49286355	49295658	+	52.93	NA	intron (NM_001290268, intron 1 of 21)	intron (NM_001290268, intron 1 of 21)	17061	NR_110890	140876	Hs.372578	NM_080829	ENSG00000042062	FAM65C	C20orf175|C20orf176	family with sequence similarity 65, member C	protein-coding
MACS_peak_795	chr2	121177608	121177816	+	52.92	NA	Intergenic	(TCCA)n|Simple_repeat|Simple_repeat	46213	NR_027181	84931	Hs.334519	NM_032845	ENSG00000280409	LINC01101	-	long intergenic non-protein coding RNA 1101	ncRNA
MACS_peak_777	chr2	86648157	86648322	+	52.89	NA	Intergenic	Intergenic	-20032	NM_018433	55818	Hs.557425	NM_018433	ENSG00000115548	KDM3A	JHDM2A|JHMD2A|JMJD1|JMJD1A|TSGA	lysine (K)-specific demethylase 3A	protein-coding
MACS_peak_1503	chr9	138471294	138471505	+	52.81	NA	intron (NR_034016, intron 3 of 5)	(TCCA)n|Simple_repeat|Simple_repeat	4628	NR_109814	100130954	Hs.550769	NR_034016	ENSG00000237339	LINC01502	-	long intergenic non-protein coding RNA 1502	ncRNA
MACS_peak_910	chr20	60464939	60465255	+	52.81	NA	intron (NM_001794, intron 7 of 15)	(TGGA)n|Simple_repeat|Simple_repeat	63621	NR_031658	100302168		NR_031658	ENSG00000221417	MIR1257	MIRN1257|hsa-mir-1257	microRNA 1257	ncRNA
MACS_peak_1519	chrUn_gl000216	6809	7075	+	52.81	NA	NA	(CATTC)n|Satellite|Satellite	NA	NA
MACS_peak_445	chr15	100598443	100598633	+	52.81	NA	intron (NM_139057, intron 15 of 21)	intron (NM_139057, intron 15 of 21)	-251406	NR_003260	196968	Hs.567763	NM_194295	ENSG00000182397	DNM1P46	C15orf51|DNM1DN14.2|DNM1DN14@	dynamin 1 pseudogene 46	pseudo
MACS_peak_164	chr11	1100256	1100467	+	52.81	NA	intron (NM_002457, intron 41 of 49)	(TCCA)n|Simple_repeat|Simple_repeat	25486	NM_002457	4583	Hs.315	NM_002457		MUC2	MLP|MUC-2|SMUC	mucin 2, oligomeric mucus/gel-forming	protein-coding
MACS_peak_157	chr10	134879742	134879913	+	52.80	NA	Intergenic	(TGGA)n|Simple_repeat|Simple_repeat	20374	NR_111905	100128127	Hs.694139	NR_111905		ADGRA1-AS1	GPR123-AS1	adhesion G protein-coupled receptor A1 antisense RNA 1	ncRNA
MACS_peak_1422	chr9	92314035	92314206	+	52.80	NA	intron (NR_024280, intron 4 of 5)	MER5A1|DNA|hAT-Charlie	59422	NR_024280	100129066	Hs.125947	NR_024280	ENSG00000237372	UNQ6494	-	uncharacterized LOC100129066	ncRNA
MACS_peak_1531	chrX	134230964	134231135	+	52.80	NA	non-coding (NR_024493, exon 2 of 2)	non-coding (NR_024493, exon 2 of 2)	1615	NR_024493	644596	Hs.656427	NR_024493	ENSG00000196972	SMIM10L2B	LINC00087|NCRNA00087	small integral membrane protein 10 like 2B	ncRNA
MACS_peak_1317	chr7	120643110	120643281	+	52.80	NA	intron (NM_001105533, intron 1 of 17)	intron (NM_001105533, intron 1 of 17)	13750	NM_001105533	79974	Hs.189652	NM_024913	ENSG00000106034	CPED1	C7orf58	cadherin-like and PC-esterase domain containing 1	protein-coding
MACS_peak_1035	chr3	139626959	139627170	+	52.79	NA	Intergenic	L2b|LINE|L2	-26963	NM_022131	64084	Hs.158529	NM_022131	ENSG00000158258	CLSTN2	ALC-GAMMA|CDHR13|CS2|CSTN2|alcagamma	calsyntenin 2	protein-coding
MACS_peak_421	chr15	76592767	76592991	+	52.79	NA	intron (NM_000126, intron 1 of 11)	L2b|LINE|L2	10931	NM_000126	2108	Hs.39925	NM_000126	ENSG00000140374	ETFA	EMA|GA2|MADD	electron-transfer-flavoprotein, alpha polypeptide	protein-coding
MACS_peak_719	chr19	45840243	45840497	+	52.77	NA	Intergenic	Intergenic	-3628	NM_177417	147700	Hs.298079	NM_145275	ENSG00000104892	KLC3	KLC2|KLC2L|KLCt|KNS2B	kinesin light chain 3	protein-coding
MACS_peak_45	chr1	109782749	109783030	+	52.77	NA	Intergenic	Intergenic	-9752	NM_001408	1952	Hs.57652	NM_001408	ENSG00000143126	CELSR2	ADGRC2|CDHF10|EGFL2|Flamingo1|MEGF3	cadherin, EGF LAG seven-pass G-type receptor 2	protein-coding
MACS_peak_470	chr16	4276253	4276460	+	52.68	NA	intron (NM_001098814, intron 1 of 5)	(TGGA)n|Simple_repeat|Simple_repeat	15725	NM_001098814	6345	Hs.10041	NM_001098814	ENSG00000185739	SRL	-	sarcalumenin	protein-coding
MACS_peak_373	chr14	101712663	101712892	+	52.66	NA	Intergenic	Intergenic	161482	NR_126006	338002	Hs.124848	NR_126006	ENSG00000259023	LINC00524	C14orf71	long intergenic non-protein coding RNA 524	ncRNA
MACS_peak_1216	chr6	13532908	13533076	+	52.62	NA	Intergenic	Intergenic	-41769	NM_001193267	23408	Hs.567431	NM_012241	ENSG00000124523	SIRT5	SIR2L5	sirtuin 5	protein-coding
MACS_peak_378	chr14	103548485	103548697	+	52.62	NA	Intergenic	(TGGA)n|Simple_repeat|Simple_repeat	-17890	NM_001077594	91828	Hs.37712	NM_001077594	ENSG00000205436	EXOC3L4	C14orf73	exocyst complex component 3-like 4	protein-coding
MACS_peak_599	chr17	5549792	5550004	+	52.62	NA	Intergenic	AluSz|SINE|Alu	-62066	NM_033007	22861	Hs.652273	NM_014922	ENSG00000091592	NLRP1	CARD7|CIDED|CLR17.1|DEFCAP|DEFCAP-L/S|NAC|NALP1|PP1044|SLEV1|VAMAS1	NLR family, pyrin domain containing 1	protein-coding
MACS_peak_1346	chr8	37002401	37002656	+	52.60	NA	intron (NR_031672, intron 1 of 2).2	MIRc|SINE|MIR	23057	NR_031672	100302233		NR_031672	ENSG00000221641	MIR1268A	MIR1268|MIRN1268|hsa-mir-1268|hsa-mir-1268a	microRNA 1268a	ncRNA
MACS_peak_1426	chr9	96112766	96113021	+	52.60	NA	Intergenic	HERVH-int|LTR|ERV1	-4197	NM_001098808	445577	Hs.575636	NM_001098808	ENSG00000204352	C9orf129	bA165J3.3	chromosome 9 open reading frame 129	protein-coding
MACS_peak_1319	chr7	128284928	128285140	+	52.60	NA	intron (NR_024368, intron 2 of 4)	AluJr|SINE|Alu	3739	NR_024368	402483	Hs.722350	NM_001039682		LINC01000	-	long intergenic non-protein coding RNA 1000	ncRNA
MACS_peak_796	chr2	128244227	128244430	+	52.59	NA	intron (NM_017969, intron 12 of 13)	intron (NM_017969, intron 12 of 13)	39759	NM_017969	55677	Hs.469879	NM_017969	ENSG00000163166	IWS1	-	IWS1 homolog (S. cerevisiae)	protein-coding
MACS_peak_1131	chr5	10870023	10870214	+	52.59	NA	Intergenic	Intergenic	-108731	NM_001291963	1611	Hs.75189	NM_004394	ENSG00000112977	DAP	-	death-associated protein	protein-coding
MACS_peak_428	chr15	83372554	83372726	+	52.59	NA	intron (NM_001278511, intron 1 of 24)	HERVH-int|LTR|ERV1	6020	NM_001278511	8120	Hs.199593	NM_004644	ENSG00000103723	AP3B2	NAPTB	adaptor-related protein complex 3, beta 2 subunit	protein-coding
MACS_peak_870	chr20	48234048	48234325	+	52.57	NA	Intergenic	(CACCC)n|Simple_repeat|Simple_repeat	-49479	NM_000961	5740	Hs.302085	NM_000961	ENSG00000124212	PTGIS	CYP8|CYP8A1|PGIS|PTGI	prostaglandin I2 (prostacyclin) synthase	protein-coding
MACS_peak_1067	chr3	197895779	197896388	+	52.57	NA	intron (NM_001145248, intron 5 of 6)	intron (NM_001145248, intron 5 of 6)	16846	NM_001145248	728262	Hs.744675	NM_001145248		FAM157A	-	family with sequence similarity 157, member A	protein-coding
MACS_peak_1165	chr5	149410381	149410591	+	52.54	NA	intron (NM_014983, intron 10 of 19)	intron (NM_014983, intron 10 of 19)	-29756	NM_030953	81789	Hs.169333	NM_030953	ENSG00000164296	TIGD6	-	tigger transposable element derived 6	protein-coding
MACS_peak_1016	chr3	79994393	79994598	+	52.53	NA	Intergenic	AluSg|SINE|Alu	-177436	NM_002941	6091	Hs.744218	NM_002941	ENSG00000169855	ROBO1	DUTT1|SAX3	roundabout guidance receptor 1	protein-coding
MACS_peak_843	chr20	18189919	18190165	+	52.50	NA	Intergenic	Intergenic	64299	NR_028402	57325	Hs.488051	NM_020536	ENSG00000149474	CSRP2BP	ATAC2|CRP2BP|KAT14|PRO1194|dJ717M23.1	CSRP2 binding protein	protein-coding
MACS_peak_548	chr16	84640989	84641166	+	52.49	NA	intron (NM_021149, intron 2 of 3)	MIRb|SINE|MIR	10625	NM_021149	23406	Hs.289092	NM_021149	ENSG00000103187	COTL1	CLP	coactosin-like F-actin binding protein 1	protein-coding
MACS_peak_626	chr17	39692326	39692535	+	52.47	NA	Intergenic	Intergenic	-7789	NM_002276	3880	Hs.654568	NM_002276	ENSG00000171345	KRT19	CK19|K19|K1CS	keratin 19, type I	protein-coding
MACS_peak_893	chr20	56527262	56527690	+	52.47	NA	Intergenic	(TCCA)n|Simple_repeat|Simple_repeat	57026	NR_039757	100616353		NR_039757	ENSG00000263453	MIR4532	mir-4532	microRNA 4532	ncRNA
MACS_peak_476	chr16	5980593	5980849	+	52.44	NA	Intergenic	(TGGG)n|Simple_repeat|Simple_repeat	-88411	NM_001142333	54715	Hs.459842	NM_018723	ENSG00000078328	RBFOX1	2BP1|A2BP1|FOX-1|FOX1|HRNBP1	RNA binding protein, fox-1 homolog (C. elegans) 1	protein-coding
MACS_peak_452	chr15	102409672	102409846	+	52.44	NA	Intergenic	L1M7|LINE|L1	27437	NR_046417	390651	Hs.578689	NR_046417	ENSG00000214344	OR4F13P	GPCRLTM7	olfactory receptor, family 4, subfamily F, member 13 pseudogene	pseudo
MACS_peak_44	chr1	107855308	107857957	+	52.43	NA	intron (NM_001312688, intron 2 of 7)	intron (NM_001312688, intron 2 of 7)	165941	NM_001113228	22854	Hs.133046	NM_014917	ENSG00000162631	NTNG1	Lmnt1	netrin G1	protein-coding
MACS_peak_849	chr20	31681557	31681770	+	52.43	NA	intron (NM_182519, intron 9 of 15)	(TCCA)n|Simple_repeat|Simple_repeat	12345	NM_182519	149954	Hs.38961	NM_182519	ENSG00000186191	BPIFB4	C20orf186|LPLUNC4|RY2G5|dJ726C3.5	BPI fold containing family B, member 4	protein-coding
MACS_peak_158	chr10	134925237	134925450	+	52.43	NA	intron (NM_001291085, intron 2 of 3)	intron (NM_001291085, intron 2 of 3)	9593	NM_001291085	84435	Hs.435183	NM_032422	ENSG00000197177	ADGRA1	GPR123	adhesion G protein-coupled receptor A1	protein-coding
MACS_peak_589	chr16	89258832	89259102	+	52.38	NA	intron (NM_004933, intron 11 of 13)	CpG-9800	7562	NM_001242757	146429	Hs.447544	NM_001242757	ENSG00000259803	SLC22A31	-	solute carrier family 22, member 31	protein-coding
MACS_peak_735	chr19	56054043	56054216	+	52.37	NA	intron (NM_001199824, intron 3 of 3)	(TCCA)n|Simple_repeat|Simple_repeat	2780	NM_001199824	100130827	Hs.712129	NM_001199824	ENSG00000231274	SBK3	SGK110	SH3 domain binding kinase family, member 3	protein-coding
MACS_peak_1241	chr6	138735079	138735252	+	52.37	NA	TTS (NM_014320)	TTS (NM_014320)	9829	NM_014320	23593	Hs.486589	NM_014320		HEBP2	C6ORF34B|C6orf34|PP23|SOUL	heme binding protein 2	protein-coding
MACS_peak_20	chr1	15657753	15657926	+	52.37	NA	intron (NM_052929, intron 14 of 30)	intron (NM_052929, intron 14 of 30)	-78552	NM_024329	79180	Hs.465374	NM_024329	ENSG00000142634	EFHD2	SWS1	EF-hand domain family member D2	protein-coding
MACS_peak_853	chr20	42469225	42469398	+	52.37	NA	Intergenic	L2b|LINE|L2	-74181	NM_001098797	84969	Hs.26608	NM_032883	ENSG00000124191	TOX2	C20orf100|GCX-1|GCX1|dJ1108D11.2|dJ495O3.1	TOX high mobility group box family member 2	protein-coding
MACS_peak_960	chr21	44892056	44892258	+	52.36	NA	intron (NR_026863, intron 2 of 3)	MLT2B1|LTR|ERVL	5946	NR_026863	114038	Hs.592161	NM_153752	ENSG00000185186	LINC00313	C21orf84|CH507-42P11.5|NCRNA00313	long intergenic non-protein coding RNA 313	ncRNA
MACS_peak_1053	chr3	193154687	193154877	+	52.35	NA	intron (NM_032279, intron 23 of 29)	AluYa5|SINE|Alu	-58268	NM_198505	344905	Hs.658032	NM_198505	ENSG00000187527	ATP13A5	-	ATPase type 13A5	protein-coding
MACS_peak_149	chr10	121072535	121072727	+	52.33	NA	intron (NM_005308, intron 1 of 15)	(TGG)n|Simple_repeat|Simple_repeat	-64853	NR_039829	100616398		NR_039829	ENSG00000265719	MIR4681	-	microRNA 4681	ncRNA
MACS_peak_1231	chr6	107925789	107925995	+	52.32	NA	intron (NM_018013, intron 5 of 6)	intron (NM_018013, intron 5 of 6)	114575	NM_018013	55084	Hs.445244	NM_018013	ENSG00000112320	SOBP	JXC1|MRAMS	sine oculis binding protein homolog	protein-coding
MACS_peak_666	chr17	80543994	80544444	+	52.30	NA	intron (NM_004514, intron 7 of 8)	G-rich|Low_complexity|Low_complexity	62192	NM_019613	56270	Hs.132161	NM_019613	ENSG00000141580	WDR45B	WDR45L|WIPI-3|WIPI3	WD repeat domain 45B	protein-coding
MACS_peak_778	chr2	87623632	87624096	+	52.30	NA	Intergenic	(CAGC)n|Simple_repeat|Simple_repeat	-131110	NR_024204	112597	Hs.652166	NM_052871	ENSG00000222041	LINC00152	C2orf59|NCRNA00152	long intergenic non-protein coding RNA 152	ncRNA
MACS_peak_968	chr21	47554221	47554452	+	52.29	NA	Intergenic	(TTAGGG)n|Simple_repeat|Simple_repeat	21145	NM_006657	10841	Hs.415846	NM_006657	ENSG00000160282	FTCD	LCHC1	formimidoyltransferase cyclodeaminase	protein-coding
MACS_peak_1472	chr9	134109480	134109595	+	52.29	NA	3' UTR (NM_005085, exon 36 of 36)	3' UTR (NM_005085, exon 36 of 36)	42369	NM_033387	286336	Hs.143878	NM_033387	ENSG00000126882	FAM78A	C9orf59	family with sequence similarity 78, member A	protein-coding
MACS_peak_942	chr21	36112597	36112854	+	52.27	NA	Intergenic	(TCCA)n|Simple_repeat|Simple_repeat	-3246	NR_024351	54064	Hs.436868	NR_024351	ENSG00000230978	LINC00160	C21orf52|NCRNA00160	long intergenic non-protein coding RNA 160	ncRNA
MACS_peak_1439	chr9	110479116	110479301	+	52.24	NA	Intergenic	CpG	-227207	NM_004235	9314	Hs.376206	NM_004235	ENSG00000136826	KLF4	EZF|GKLF	Kruppel-like factor 4 (gut)	protein-coding
MACS_peak_948	chr21	41769568	41769921	+	52.22	NA	intron (NR_073202, intron 3 of 32)	(CTA)n|Simple_repeat|Simple_repeat	14733	NR_038899	100506492	Hs.667053	NR_038896	ENSG00000235123	DSCAM-AS1	M41	DSCAM antisense RNA 1	ncRNA
MACS_peak_410	chr15	51673999	51674226	+	52.17	NA	intron (NM_181789, intron 2 of 9)	intron (NM_181789, intron 2 of 9)	40399	NM_181789	342035	Hs.526441	NM_181789	ENSG00000186417	GLDN	CLOM|COLM|CRG-L2|CRGL2|UNC-112	gliomedin	protein-coding
MACS_peak_1176	chr5	171614267	171614525	+	52.10	NA	intron (NM_005990, intron 1 of 18)	intron (NM_005990, intron 1 of 18)	950	NM_005990	6793	Hs.744005	NM_005990	ENSG00000072786	STK10	LOK|PRO2729	serine/threonine kinase 10	protein-coding
MACS_peak_239	chr12	18808603	18808818	+	52.06	NA	Intergenic	L1MC3|LINE|L1	82283	NM_033123	89869	Hs.97542	NM_033123	ENSG00000139151	PLCZ1	NYD-SP27|PLC-zeta-1|PLCzeta	phospholipase C, zeta 1	protein-coding
MACS_peak_1371	chr8	125235262	125235559	+	52.05	NA	intron (NR_125420, intron 1 of 2)	intron (NR_125420, intron 1 of 2)	24229	NR_125420	101927588	Hs.617072	NR_125420	ENSG00000214803	LOC101927588	-	uncharacterized LOC101927588	ncRNA
MACS_peak_501	chr16	21055370	21055546	+	51.98	NA	intron (NM_017539, intron 31 of 61)	L1PA2|LINE|L1	-114240	NM_001301769	57146	Hs.258212	NM_020422	ENSG00000011638	TMEM159	-	transmembrane protein 159	protein-coding
MACS_peak_247	chr12	53194097	53194395	+	51.97	NA	Intergenic	Intergenic	-4354	NM_057088	3850	Hs.680652	NM_057088	ENSG00000186442	KRT3	CK3|K3	keratin 3, type II	protein-coding
MACS_peak_1002	chr3	19397452	19397701	+	51.95	NA	intron (NM_144633, intron 5 of 15)	intron (NM_144633, intron 5 of 15)	-41153	NR_039954	100616291		NR_039954	ENSG00000271898	MIR4791	mir-4791	microRNA 4791	ncRNA
MACS_peak_1204	chr5	180066416	180066591	+	51.94	NA	intron (NM_182925, intron 1 of 29)	(TGGA)n|Simple_repeat|Simple_repeat	10121	NM_002020	2324	Hs.646917	NM_002020	ENSG00000037280	FLT4	FLT41|LMPH1A|PCL|VEGFR3	fms-related tyrosine kinase 4	protein-coding
MACS_peak_1316	chr7	117766068	117766243	+	51.94	NA	Intergenic	L1PA6|LINE|L1	-57931	NM_016200	51691	Hs.655046	NM_016200		LSM8	NAA38	LSM8 homolog, U6 small nuclear RNA associated	protein-coding
MACS_peak_533	chr16	78239354	78239634	+	51.94	NA	intron (NM_001291997, intron 4 of 7)	(TCCA)n|Simple_repeat|Simple_repeat	106184	NM_001291997	51741	Hs.461453	NM_016373	ENSG00000186153	WWOX	D16S432E|EIEE28|FOR|FRA16D|HHCMA56|PRO0128|SCAR12|SDR41C1|WOX1	WW domain containing oxidoreductase	protein-coding
MACS_peak_327	chr13	27214023	27214217	+	51.92	NA	intron (NM_001291965, intron 2 of 9)	MER74A|LTR|ERVL	82280	NM_006646	10810	Hs.618732	NM_006646	ENSG00000132970	WASF3	Brush-1|SCAR3|WAVE3	WAS protein family, member 3	protein-coding
MACS_peak_635	chr17	60869885	60870496	+	51.91	NA	intron (NM_001100875, intron 2 of 10)	(CCA)n|Simple_repeat|Simple_repeat	13824	NM_001100875	162333	Hs.665663	NM_152598	ENSG00000173838	MARCH10	MARCH-X|RNF190	membrane associated ring finger 10	protein-coding
MACS_peak_940	chr21	22682297	22682513	+	51.87	NA	intron (NM_004540, intron 5 of 17)	intron (NM_004540, intron 5 of 17)	311772	NM_004540	4685	Hs.473450	NM_004540	ENSG00000154654	NCAM2	NCAM21	neural cell adhesion molecule 2	protein-coding
MACS_peak_83	chr1	204591954	204592177	+	51.87	NA	intron (NM_201630, intron 1 of 1)	intron (NM_201630, intron 1 of 1)	62416	NM_006338	10446	Hs.26312	NM_006338	ENSG00000170382	LRRN2	FIGLER7|GAC1|LRANK1|LRRN5	leucine rich repeat neuronal 2	protein-coding
MACS_peak_1374	chr8	126333122	126333415	+	51.82	NA	intron (NM_173685, intron 5 of 7)	MSTA|LTR|ERVL-MaLR	-109295	NM_025195	10221	Hs.444947	NM_025195	ENSG00000173334	TRIB1	C8FW|GIG-2|GIG2|SKIP1|TRB-1|TRB1	tribbles pseudokinase 1	protein-coding
MACS_peak_539	chr16	82758868	82759075	+	51.81	NA	intron (NM_001220488, intron 2 of 14)	MIR3|SINE|MIR	36435	NR_107025	102465863		NR_107025	ENSG00000277387	MIR8058	hsa-mir-8058	microRNA 8058	ncRNA
MACS_peak_55	chr1	142535454	142536826	+	51.81	NA	Intergenic	(GAATG)n|Simple_repeat|Simple_repeat	177465	NR_046228	100874392	Hs.648245	NR_046228		ANKRD20A12P	-	ankyrin repeat domain 20 family, member A12, pseudogene	pseudo
MACS_peak_1040	chr3	149793114	149793350	+	51.80	NA	Intergenic	Intergenic	104166	NR_036538	646903	Hs.632559	NR_036538		LOC646903	-	uncharacterized LOC646903	ncRNA
MACS_peak_357	chr14	91687626	91687840	+	51.78	NA	intron (NM_024952, intron 13 of 13)	(TGGA)n|Simple_repeat|Simple_repeat	23119	NM_001177676	8111	Hs.8882	NM_003485	ENSG00000119714	GPR68	GPR12A|OGR1	G protein-coupled receptor 68	protein-coding
MACS_peak_1235	chr6	121508977	121509237	+	51.77	NA	intron (NR_104452, intron 24 of 35)	intron (NR_104452, intron 24 of 35)	146539	NR_104452	221322	Hs.121396	NM_152730	ENSG00000146350	TBC1D32	BROMI|C6orf170|C6orf171|bA301B7.2|bA57L9.1|dJ310J6.1	TBC1 domain family, member 32	protein-coding
MACS_peak_46	chr1	110370279	110370491	+	51.75	NA	Intergenic	MIR|SINE|MIR	-63741	NM_024526	79574	Hs.485352	NM_024526	ENSG00000198758	EPS8L3	EPS8R3	EPS8-like 3	protein-coding
MACS_peak_1103	chr4	48716787	48716963	+	51.73	NA	intron (NM_015030, intron 1 of 63)	L1PA3|LINE|L1	65441	NM_015030	285527	Hs.595553	NM_015030	ENSG00000075539	FRYL	AF4p12|KIAA0826	FRY like transcription coactivator	protein-coding
MACS_peak_1471	chr9	133945300	133945474	+	51.73	NA	intron (NM_006059, intron 17 of 27)	intron (NM_006059, intron 17 of 27)	-26476	NR_033701	83543	Hs.4944	NM_031426	ENSG00000126878	AIF1L	C9orf58|IBA2	allograft inflammatory factor 1-like	protein-coding
MACS_peak_94	chr10	392410	392627	+	51.69	NA	intron (NM_014974, intron 26 of 36)	CpG	-64492	NR_106988	102465753		NR_106988		MIR7641-2	B-ATF|hsa-mir-7641-2	microRNA 7641-2	ncRNA
MACS_peak_27	chr1	18376258	18376475	+	51.69	NA	Intergenic	HAL1-2a_MD|LINE|L1	-15785	NR_125946	101927876	Hs.522954	NR_125946	ENSG00000261781	LOC101927876	-	uncharacterized LOC101927876	ncRNA
MACS_peak_67	chr1	152134966	152135421	+	51.68	NA	Intergenic	MIRb|SINE|MIR	-3489	NM_001122965	126638	Hs.376144	NM_152364	ENSG00000215853	RPTN	-	repetin	protein-coding
MACS_peak_1236	chr6	123402588	123402805	+	51.67	NA	Intergenic	THE1A-int|LTR|ERVL-MaLR	85580	NM_001010852	134829	Hs.486361	NM_001010852	ENSG00000146352	CLVS2	C6orf212|C6orf213|RLBP1L2|bA160A10.4	clavesin 2	protein-coding
MACS_peak_1375	chr8	127570047	127570317	+	51.66	NA	intron (NM_174911, intron 1 of 1)	CpG	529	NM_174911	157638	Hs.741352	NM_174911	ENSG00000168672	FAM84B	BCMP101|NSE2	family with sequence similarity 84, member B	protein-coding
MACS_peak_1367	chr8	115131826	115131977	+	51.65	NA	Intergenic	Intergenic	-682659	NM_198123	114788	Hs.91381	NM_052900	ENSG00000164796	CSMD3	-	CUB and Sushi multiple domains 3	protein-coding
MACS_peak_1299	chr7	94390023	94390209	+	51.64	NA	Intergenic	L2a|LINE|L2	104479	NM_001184962	23089	Hs.147492	NM_015068	ENSG00000242265	PEG10	EDR|HB-1|MEF3L|Mar2|Mart2|RGAG3	paternally expressed 10	protein-coding
MACS_peak_721	chr19	47909142	47909354	+	51.64	NA	intron (NM_001301059, intron 12 of 12)	(TGGA)n|Simple_repeat|Simple_repeat	13537	NM_001301059	56917	Hs.380923	NM_020160	ENSG00000105419	MEIS3	MRG2	Meis homeobox 3	protein-coding
MACS_peak_434	chr15	88320974	88321211	+	51.62	NA	Intergenic	Intergenic	200932	NR_026869	145978	Hs.350808	NM_152454	ENSG00000259527	LINC00052	NCRNA00052|TMEM83	long intergenic non-protein coding RNA 52	ncRNA
MACS_peak_88	chr1	215865487	215865666	+	51.59	NA	intron (NM_206933, intron 61 of 71)	L2|LINE|L2	124841	NM_016121	51133	Hs.335139	NM_016121	ENSG00000136636	KCTD3	NY-REN-45	potassium channel tetramerization domain containing 3	protein-coding
MACS_peak_451	chr15	102082914	102083218	+	51.56	NA	Intergenic	Intergenic	-52879	NM_138322	5046	Hs.498494	NM_002570	ENSG00000140479	PCSK6	PACE4|SPC4	proprotein convertase subtilisin/kexin type 6	protein-coding
MACS_peak_1146	chr5	70174657	70174834	+	51.52	NA	Intergenic	Intergenic	-21745	NM_021967	8293	Hs.726820	NM_021967	ENSG00000172058	SERF1A	4F5|FAM2A|H4F5|SERF1|SMAM1	small EDRK-rich factor 1A (telomeric)	protein-coding
MACS_peak_259	chr12	99171479	99171656	+	51.52	NA	intron (NM_020140, intron 8 of 10)	intron (NM_020140, intron 8 of 10)	117107	NM_001204079	56899	Hs.506458	NM_020140	ENSG00000185046	ANKS1B	AIDA|AIDA-1|ANKS2|EB-1|EB1|cajalin-2	ankyrin repeat and sterile alpha motif domain containing 1B	protein-coding
MACS_peak_769	chr2	53769233	53769410	+	51.52	NA	Intergenic	L1PB2|LINE|L1	-225608	NM_001008708	494143	Hs.585944	NM_001008708	ENSG00000143942	CHAC2	-	ChaC, cation transport regulator homolog 2 (E. coli)	protein-coding
MACS_peak_50	chr1	113354995	113355172	+	51.51	NA	Intergenic	HERVH-int|LTR|ERV1	38182	NR_103746	100996702	Hs.632431	NR_103746	ENSG00000215866	LINC01356	-	long intergenic non-protein coding RNA 1356	ncRNA
MACS_peak_1031	chr3	128164595	128164795	+	51.51	NA	Intergenic	(TGG)n|Simple_repeat|Simple_repeat	-17742	NR_037890	285224	Hs.683815	NR_037890	ENSG00000242049	DNAJB8-AS1	-	DNAJB8 antisense RNA 1	ncRNA
MACS_peak_302	chr12	131815816	131816034	+	51.51	NA	Intergenic	(TCCA)n|Simple_repeat|Simple_repeat	-16090	NR_103736	338797	Hs.592007	NM_001025466		LOC338797	-	uncharacterized LOC338797	ncRNA
MACS_peak_605	chr17	18283731	18283949	+	51.51	NA	intron (NM_001145127, intron 1 of 10)	intron (NM_001145127, intron 1 of 10)	2761	NM_001145127	645027	Hs.462400	NM_001145127	ENSG00000214860	EVPLL	-	envoplakin-like	protein-coding
MACS_peak_506	chr16	23768194	23768371	+	51.51	NA	intron (NM_022097, intron 5 of 6)	intron (NM_022097, intron 5 of 6)	2334	NM_022097	63928	Hs.178589	NM_022097	ENSG00000166869	CHP2	-	calcineurin-like EF-hand protein 2	protein-coding
MACS_peak_270	chr12	116642352	116642570	+	51.49	NA	intron (NM_015335, intron 2 of 30)	intron (NM_015335, intron 2 of 30)	-56002	NR_030351	693205		NR_030351	ENSG00000207967	MIR620	MIRN620|hsa-mir-620	microRNA 620	ncRNA
MACS_peak_262	chr12	109124989	109125147	+	51.42	NA	promoter-TSS (NM_001276471)	promoter-TSS (NM_001276471)	258	NM_014325	23603	Hs.330384	NM_014325	ENSG00000110880	CORO1C	HCRNN4	coronin, actin binding protein, 1C	protein-coding
MACS_peak_794	chr2	121177372	121177588	+	51.41	NA	Intergenic	(TCCA)n|Simple_repeat|Simple_repeat	46445	NR_027181	84931	Hs.334519	NM_032845	ENSG00000280409	LINC01101	-	long intergenic non-protein coding RNA 1101	ncRNA
MACS_peak_573	chr16	88306336	88306541	+	51.36	NA	Intergenic	(TGGA)n|Simple_repeat|Simple_repeat	78551	NR_110944	101928880	Hs.634835	NR_110944	ENSG00000260420	LOC101928880	LA16c-444G7.2	uncharacterized LOC101928880	ncRNA
MACS_peak_1024	chr3	107802721	107802877	+	51.34	NA	intron (NM_198793, intron 1 of 8)	L2c|LINE|L2	7136	NM_198793	961	Hs.446414	NM_001777	ENSG00000196776	CD47	IAP|MER6|OA3	CD47 molecule	protein-coding
MACS_peak_1157	chr5	127435320	127435513	+	51.33	NA	intron (NM_001256461, intron 1 of 25)	Tigger3b|DNA|TcMar-Tigger	15933	NR_046207	6558	Hs.162585	NM_001046	ENSG00000064651	SLC12A2	BSC|BSC2|NKCC1|PPP1R141	solute carrier family 12 (sodium/potassium/chloride transporter), member 2	protein-coding
MACS_peak_1149	chr5	87970059	87970237	+	51.32	NA	intron (NR_015436, intron 1 of 4)	CpG	-1002	NR_024384	645323	Hs.12827	NR_015436	ENSG00000245526	LINC00461	EyeLinc1|VISC|Visc-1a|Visc-1b|Visc-2	long intergenic non-protein coding RNA 461	ncRNA
MACS_peak_1178	chr5	172390382	172390566	+	51.32	NA	intron (NM_016093, intron 2 of 3)	L2c|LINE|L2	4035	NM_016093	51121	Hs.546390	NM_016093	ENSG00000037241	RPL26L1	RPL26P1	ribosomal protein L26-like 1	protein-coding
MACS_peak_1523	chrX	4147892	4148070	+	51.32	NA	Intergenic	(CCTA)n|Simple_repeat|Simple_repeat	-386046	NR_034031	389906	Hs.636199	NR_034031		LOC389906	-	zinc finger protein 839 pseudogene	pseudo
MACS_peak_1233	chr6	115458704	115458882	+	51.32	NA	Intergenic	Intergenic	-901101	NR_027338	728402	Hs.729953	NR_027338		TPI1P3	-	triosephosphate isomerase 1 pseudogene 3	pseudo
MACS_peak_268	chr12	112734802	112735021	+	51.32	NA	intron (NM_001109662, intron 7 of 75)	intron (NM_001109662, intron 7 of 75)	84985	NM_001109662	283450	Hs.530943	NM_173813	ENSG00000173064	HECTD4	C12orf51|POTAGE	HECT domain containing E3 ubiquitin protein ligase 4	protein-coding
MACS_peak_682	chr19	1717287	1717550	+	51.28	NA	Intergenic	(TGGA)n|Simple_repeat|Simple_repeat	-36244	NM_001080488	390874	Hs.654347	NM_001080488		ONECUT3	OC3	one cut homeobox 3	protein-coding
MACS_peak_1041	chr3	153709743	153709962	+	51.27	NA	Intergenic	THE1A-int|LTR|ERVL-MaLR	-128940	NM_001251962	26084	Hs.240845	NM_015595	ENSG00000114790	ARHGEF26	CSGEF|HMFN1864|SGEF	Rho guanine nucleotide exchange factor 26	protein-coding
MACS_peak_851	chr20	39971096	39971519	+	51.24	NA	intron (NR_126051, intron 1 of 19)	intron (NR_126051, intron 1 of 19)	1814	NM_001301860	64900	Hs.25897	NM_022896	ENSG00000132793	LPIN3	LIPN3L|SMP2	lipin 3	protein-coding
MACS_peak_249	chr12	53365720	53366095	+	51.21	NA	Intergenic	Intergenic	-22257	NM_001256293	3856	Hs.533782	NM_002273	ENSG00000170421	KRT8	CARD2|CK-8|CK8|CYK8|K2C8|K8|KO	keratin 8, type II	protein-coding
MACS_peak_951	chr21	43006645	43006835	+	51.18	NA	Intergenic	(CATCC)n|Simple_repeat|Simple_repeat	-92722	NR_024367	54090	Hs.570442	NR_024367		LINC00111	C21orf21|NCRNA00111	long intergenic non-protein coding RNA 111	ncRNA
MACS_peak_1283	chr7	45286336	45286534	+	51.11	NA	Intergenic	L1M4b|LINE|L1	89068	NM_005856	10268	Hs.25691	NM_005856	ENSG00000122679	RAMP3	-	receptor (G protein-coupled) activity modifying protein 3	protein-coding
MACS_peak_1126	chr5	2584544	2584723	+	51.11	NA	Intergenic	(TGGA)n|Simple_repeat|Simple_repeat	167136	NM_001134222	153572	Hs.282089	NM_033267	ENSG00000170561	IRX2	IRXA2	iroquois homeobox 2	protein-coding
MACS_peak_653	chr17	75854403	75854582	+	51.11	NA	Intergenic	(TCCA)n|Simple_repeat|Simple_repeat	25677	NR_028337	400624	Hs.514521	NM_001001685	ENSG00000204283	FLJ45079	-	FLJ45079 protein	ncRNA
MACS_peak_1048	chr3	171275764	171275962	+	51.11	NA	Intergenic	L2c|LINE|L2	-97666	NM_001161562	23043	Hs.34024	NM_015028	ENSG00000154310	TNIK	-	TRAF2 and NCK interacting kinase	protein-coding
MACS_peak_419	chr15	74047931	74048108	+	51.10	NA	Intergenic	MIRb|SINE|MIR	-3308	NM_001303254	388135	Hs.40794	NM_001039614	ENSG00000205363	C15orf59	-	chromosome 15 open reading frame 59	protein-coding
MACS_peak_881	chr20	50593544	50593887	+	51.08	NA	Intergenic	Intergenic	-114263	NR_110016	101927678	Hs.683840	NR_110016	ENSG00000227964	LINC01429	-	long intergenic non-protein coding RNA 1429	ncRNA
MACS_peak_899	chr20	57405196	57405826	+	51.05	NA	intron (NR_002785, intron 4 of 4)	(CCA)n|Simple_repeat|Simple_repeat	-9262	NM_016592	2778	Hs.125898	NM_000516	ENSG00000087460	GNAS	AHO|C20orf45|GNAS1|GPSA|GSA|GSP|NESP|POH|SCG6|SgVI	GNAS complex locus	protein-coding
MACS_peak_1433	chr9	100453174	100453441	+	51.04	NA	intron (NR_027302, intron 2 of 6)	intron (NR_027302, intron 2 of 6)	6384	NR_027302	7507	Hs.654364	NM_000380	ENSG00000136936	XPA	XP1|XPAC	xeroderma pigmentosum, complementation group A	protein-coding
MACS_peak_1355	chr8	90889115	90889440	+	51.04	NA	Intergenic	Intergenic	-24819	NM_004337	734	Hs.436445	NM_004337	ENSG00000164823	OSGIN2	C8orf1|hT41	oxidative stress induced growth inhibitor family member 2	protein-coding
MACS_peak_785	chr2	100633335	100633556	+	50.96	NA	intron (NM_001025108, intron 2 of 23)	(TGG)n|Simple_repeat|Simple_repeat	88600	NM_001025108	3899	Hs.444414	NM_002285	ENSG00000144218	AFF3	LAF4|MLLT2-like	AF4/FMR2 family, member 3	protein-coding
MACS_peak_1310	chr7	101374761	101375010	+	50.93	NA	Intergenic	Intergenic	-84299	NM_001913	1523	Hs.191482	NM_001913	ENSG00000257923	CUX1	CASP|CDP|CDP/Cut|CDP1|COY1|CUTL1|CUX|Clox|Cux/CDP|GOLIM6|Nbla10317|p100|p110|p200|p75	cut-like homeobox 1	protein-coding
MACS_peak_54	chr1	120629442	120629756	+	50.93	NA	Intergenic	MLT1D|LTR|ERVL-MaLR	-17282	NM_024408	4853	Hs.487360	NM_024408	ENSG00000134250	NOTCH2	AGS2|HJCYS|hN2	notch 2	protein-coding
MACS_peak_1444	chr9	112048315	112048518	+	50.90	NA	intron (NM_019114, intron 1 of 25)	intron (NM_019114, intron 1 of 25)	34828	NM_019114	54566	Hs.591901	NM_018424	ENSG00000095203	EPB41L4B	CG1|EHM2	erythrocyte membrane protein band 4.1 like 4B	protein-coding
MACS_peak_459	chr16	1002766	1002965	+	50.90	NA	intron (NR_033645, intron 2 of 11)	(CCCA)n|Simple_repeat|Simple_repeat	18119	NR_033646	64788	Hs.71912	NM_022773	ENSG00000103227	LMF1	C16orf26|HMFN1876|JFP11|TMEM112|TMEM112A	lipase maturation factor 1	protein-coding
MACS_peak_1177	chr5	172064018	172064201	+	50.90	NA	Intergenic	Intergenic	-4160	NM_001308178	54492	Hs.91521	NM_001142651	ENSG00000214357	NEURL1B	NEURL3|hNeur2|neur2	neuralized E3 ubiquitin protein ligase 1B	protein-coding
MACS_peak_1168	chr5	168173784	168173988	+	50.90	NA	intron (NM_001271946, intron 20 of 35)	(GTGTG)n|Simple_repeat|Simple_repeat	21374	NR_029632	407001		NR_029632	ENSG00000207739	MIR218-2	MIRN218-2|mir-218-2	microRNA 218-2	ncRNA
MACS_peak_12	chr1	4433205	4433398	+	50.90	NA	Intergenic	(TCCA)n|Simple_repeat|Simple_repeat	-38810	NR_027088	284661	Hs.278112	NR_027088	ENSG00000235054	LOC284661	-	uncharacterized LOC284661	ncRNA
MACS_peak_343	chr14	57250646	57250826	+	50.90	NA	Intergenic	AluJb|SINE|Alu	21645	NM_172337	5015	Hs.288655	NM_021728		OTX2	CPHD6|MCOPS5	orthodenticle homeobox 2	protein-coding
MACS_peak_317	chr12	132702166	132702371	+	50.90	NA	intron (NM_001122636, intron 6 of 10)	intron (NM_001122636, intron 6 of 10)	-11695	NM_021808	50614	Hs.301062	NM_021808	ENSG00000182870	GALNT9	GALNAC-T9|GALNACT9	polypeptide N-acetylgalactosaminyltransferase 9	protein-coding
MACS_peak_1020	chr3	98642887	98643066	+	50.90	NA	Intergenic	MIR|SINE|MIR	-22443	NM_080927	131566	Hs.203691	NM_080927	ENSG00000057019	DCBLD2	CLCP1|ESDN	discoidin, CUB and LCCL domain containing 2	protein-coding
MACS_peak_1101	chr4	39814352	39814557	+	50.90	NA	Intergenic	(TG)n|Simple_repeat|Simple_repeat	114790	NM_001312647	3093	Hs.50308	NM_005339	ENSG00000078140	UBE2K	E2-25K|HIP2|HYPG|LIG|UBC1	ubiquitin conjugating enzyme E2K	protein-coding
MACS_peak_600	chr17	6924937	6925129	+	50.90	NA	Intergenic	Intergenic	-1336	NM_181844	255877	Hs.22575	NM_181844	ENSG00000161940	BCL6B	BAZF|ZBTB28|ZNF62	B-cell CLL/lymphoma 6, member B	protein-coding
MACS_peak_1479	chr9	136344761	136344966	+	50.90	NA	promoter-TSS (NM_017585)	promoter-TSS (NM_017585)	-587	NM_017585	11182	Hs.244378	NM_017585	ENSG00000160326	SLC2A6	GLUT6|GLUT9|HSA011372	solute carrier family 2 (facilitated glucose transporter), member 6	protein-coding
MACS_peak_496	chr16	16265300	16265517	+	50.90	NA	intron (NM_001171, intron 21 of 30)	(TGGG)n|Simple_repeat|Simple_repeat	51920	NM_001171	368	Hs.442182	NM_001171	ENSG00000091262	ABCC6	ABC34|ARA|EST349056|GACI2|MLP1|MOAT-E|MOATE|MRP6|PXE|PXE1|URG7	ATP binding cassette subfamily C member 6	protein-coding
MACS_peak_1243	chr6	147763543	147763752	+	50.90	NA	Intergenic	Intergenic	-66181	NM_001030060	389432	Hs.567973	NM_001030060	ENSG00000203727	SAMD5	dJ875H10.1	sterile alpha motif domain containing 5	protein-coding
MACS_peak_1325	chr7	138772609	138772817	+	50.90	NA	intron (NM_020119, intron 2 of 12)	AluJb|SINE|Alu	21752	NM_020119	56829	Hs.133512	NM_020119	ENSG00000105939	ZC3HAV1	ARTD13|FLB6421|PARP13|ZAP|ZC3H2|ZC3HDC2	zinc finger CCCH-type, antiviral 1	protein-coding
MACS_peak_622	chr17	29763849	29764064	+	50.90	NA	intron (NM_032932, intron 3 of 14)	AluY|SINE|Alu	45314	NM_032932	84440	Hs.406788	NM_032932	ENSG00000131242	RAB11FIP4	RAB11-FIP4	RAB11 family interacting protein 4 (class II)	protein-coding
MACS_peak_743	chr2	1537061	1537241	+	50.90	NA	intron (NM_175721, intron 13 of 14)	intron (NM_175721, intron 13 of 14)	118971	NM_175721	7173	Hs.467554	NM_000547	ENSG00000115705	TPO	MSA|TDH2A|TPX	thyroid peroxidase	protein-coding
MACS_peak_170	chr11	17512791	17512972	+	50.90	NA	Intergenic	MIR3|SINE|MIR	-14489	NM_000352	6833	Hs.54470	NM_000352	ENSG00000006071	ABCC8	ABC36|HHF1|HI|HRINS|MRP8|PHHI|SUR|SUR1|SUR1delta2|TNDM2	ATP binding cassette subfamily C member 8	protein-coding
MACS_peak_993	chr3	13247413	13247610	+	50.90	NA	Intergenic	(TCCA)n|Simple_repeat|Simple_repeat	-132894	NM_001134382	9922	Hs.475506	NM_014869	ENSG00000144711	IQSEC1	ARF-GEP100|ARFGEP100|BRAG2|GEP100	IQ motif and Sec7 domain 1	protein-coding
MACS_peak_908	chr20	60246489	60246690	+	50.90	NA	intron (NM_001252339, intron 1 of 14)	(TGGA)n|Simple_repeat|Simple_repeat	71772	NM_001252339	1002	Hs.473231	NM_001794	ENSG00000179242	CDH4	CAD4|R-CAD|RCAD	cadherin 4, type 1, R-cadherin (retinal)	protein-coding
MACS_peak_513	chr16	27470211	27470427	+	50.90	NA	Intergenic	Intergenic	-5605	NR_037158	283888	Hs.660935	NR_037158	ENSG00000259954	IL21R-AS1	-	IL21R antisense RNA 1	ncRNA
MACS_peak_1223	chr6	34520926	34521146	+	50.90	NA	intron (NM_001252294, intron 1 of 4)	intron (NM_001252294, intron 1 of 4)	3074	NM_012391	25803	Hs.485158	NM_012391	ENSG00000124664	SPDEF	PDEF|bA375E1.3	SAM pointed domain containing ETS transcription factor	protein-coding
MACS_peak_1294	chr7	79726530	79726726	+	50.90	NA	Intergenic	Intergenic	-37512	NM_002069	2770	Hs.134587	NM_002069	ENSG00000127955	GNAI1	Gi	guanine nucleotide binding protein (G protein), alpha inhibiting activity polypeptide 1	protein-coding
MACS_peak_1213	chr6	9011264	9011455	+	50.90	NA	Intergenic	L1PB1|LINE|L1	358917	NR_004855	728655	Hs.214343	NR_004855	ENSG00000251164	HULC	HCCAT1|LINC00078|NCRNA00078	hepatocellular carcinoma up-regulated long non-coding RNA	ncRNA
MACS_peak_457	chr16	907992	908173	+	50.90	NA	intron (NM_022773, intron 10 of 10)	(GTGTG)n|Simple_repeat|Simple_repeat	52639	NM_001013638	388199	Hs.528461	NM_001013638	ENSG00000167945	PRR25	gs64	proline rich 25	protein-coding
MACS_peak_1296	chr7	91397077	91397257	+	50.90	NA	Intergenic	MER61A|LTR|ERV1	112867	NM_001301135	7978	Hs.532216	NM_006980	ENSG00000127989	MTERF1	MTERF	mitochondrial transcription termination factor 1	protein-coding
MACS_peak_431	chr15	87211488	87211677	+	50.90	NA	intron (NM_152336, intron 21 of 23)	intron (NM_152336, intron 21 of 23)	-351383	NR_046012	727915	Hs.451281	NR_046012	ENSG00000260125	AGBL1-AS1	-	AGBL1 antisense RNA 1	ncRNA
MACS_peak_738	chr19	59097880	59098080	+	50.90	NA	Intergenic	(TTAGGG)n|Simple_repeat|Simple_repeat	11214	NR_026052	65996	Hs.541177	NM_023939	ENSG00000213753	CENPBD1P1	-	CENPB DNA-binding domains containing 1 pseudogene 1	pseudo
MACS_peak_99	chr10	1255259	1255460	+	50.90	NA	intron (NM_018702, intron 7 of 9)	(CACCAT)n|Simple_repeat|Simple_repeat	49651	NR_015376	399706	Hs.721191	NM_001010910	ENSG00000229205	LINC00200	C10orf139|NCRNA00200	long intergenic non-protein coding RNA 200	ncRNA
MACS_peak_473	chr16	4743535	4743753	+	50.90	NA	promoter-TSS (NM_032349)	promoter-TSS (NM_032349)	-50	NM_032349	84309	Hs.513315	NM_032349	ENSG00000168101	NUDT16L1	SDOS	nudix hydrolase 16 like 1	protein-coding
MACS_peak_825	chr2	221559838	221560041	+	50.90	NA	Intergenic	Intergenic	-788653	NR_036228	100422959		NR_036228	ENSG00000266518	MIR4268	-	microRNA 4268	ncRNA
MACS_peak_338	chr14	24806640	24806795	+	50.90	NA	intron (NM_006871, intron 7 of 9)	intron (NM_006871, intron 7 of 9)	-2440	NM_001198592	196883	Hs.443428	NM_139247	ENSG00000129467	ADCY4	AC4	adenylate cyclase 4	protein-coding
MACS_peak_482	chr16	6423386	6423595	+	50.90	NA	intron (NM_001308117, intron 2 of 15)	intron (NM_001308117, intron 2 of 15)	353786	NM_001308117	54715	Hs.459842	NM_018723	ENSG00000078328	RBFOX1	2BP1|A2BP1|FOX-1|FOX1|HRNBP1	RNA binding protein, fox-1 homolog (C. elegans) 1	protein-coding
MACS_peak_841	chr20	18002807	18003010	+	50.90	NA	Intergenic	Intergenic	35618	NM_021220	58495	Hs.661013	NM_021220	ENSG00000125850	OVOL2	EUROIMAGE566589|ZNF339	ovo-like zinc finger 2	protein-coding
MACS_peak_821	chr2	201542283	201542459	+	50.90	NA	Intergenic	Intergenic	-18075	NR_001557	344454	Hs.148269	NR_001557		AOX2P	AOH2|AOX2	aldehyde oxidase 2 pseudogene	pseudo
MACS_peak_820	chr2	197087349	197087566	+	50.90	NA	intron (NM_001304840, intron 21 of 26)	intron (NM_001304840, intron 21 of 26)	-37291	NR_110225	101927482	Hs.191841	NR_110225		LOC101927482	-	uncharacterized LOC101927482	ncRNA
MACS_peak_173	chr11	46533167	46533324	+	50.90	NA	intron (NM_001267783, intron 8 of 17)	intron (NM_001267783, intron 8 of 17)	-59806	NR_036117	100422827		NR_036117	ENSG00000265014	MIR3160-1	mir-3160-1	microRNA 3160-1	ncRNA
MACS_peak_787	chr2	106812848	106813028	+	50.90	NA	Intergenic	Intergenic	-2143	NM_025076	80146	Hs.469561	NM_025076	ENSG00000115652	UXS1	SDR6E1|UGD	UDP-glucuronate decarboxylase 1	protein-coding
MACS_peak_961	chr21	44923781	44923966	+	50.90	NA	Intergenic	Intergenic	-25770	NR_026863	114038	Hs.592161	NM_153752	ENSG00000185186	LINC00313	C21orf84|CH507-42P11.5|NCRNA00313	long intergenic non-protein coding RNA 313	ncRNA
MACS_peak_311	chr12	132173569	132173767	+	50.90	NA	Intergenic	Intergenic	-21964	NM_004592	6433	Hs.308171	NM_004592	ENSG00000061936	SFSWAP	SFRS8|SWAP	splicing factor, suppressor of white-apricot family	protein-coding
MACS_peak_974	chr22	19557841	19558048	+	50.90	NA	Intergenic	(GGGTG)n|Simple_repeat|Simple_repeat	-3582	NR_024381	150185	Hs.719752	NR_024381		LINC00895	-	long intergenic non-protein coding RNA 895	ncRNA
MACS_peak_368	chr14	97468815	97469033	+	50.90	NA	Intergenic	(TCCA)n|Simple_repeat|Simple_repeat	59008	NR_104113	145249	Hs.592323	NR_104113	ENSG00000225163	LINC00618	C14orf63	long intergenic non-protein coding RNA 618	ncRNA
MACS_peak_245	chr12	49947212	49947420	+	50.90	NA	intron (NM_001314030, intron 10 of 14)	intron (NM_001314030, intron 10 of 14)	12906	NM_001012300	10445	Hs.25313	NM_006337	ENSG00000187778	MCRS1	ICP22BP|INO80Q|MCRS2|MSP58|P78	microspherule protein 1	protein-coding
MACS_peak_53	chr1	120013872	120014076	+	50.90	NA	Intergenic	Intergenic	-35852	NM_000862	3283	Hs.364941	NM_000862	ENSG00000203857	HSD3B1	3BETAHSD|HSD3B|HSDB3|HSDB3A|I|SDR11E1	hydroxy-delta-5-steroid dehydrogenase, 3 beta- and steroid delta-isomerase 1	protein-coding
MACS_peak_316	chr12	132651173	132651367	+	50.90	NA	Intergenic	(TCCA)n|Simple_repeat|Simple_repeat	22298	NM_024078	79050	Hs.558536	NM_024078	ENSG00000184967	NOC4L	NET49|NOC4|UTP19	nucleolar complex associated 4 homolog	protein-coding
MACS_peak_1290	chr7	76027161	76027341	+	50.89	NA	intron (NM_080744, intron 5 of 10)	intron (NM_080744, intron 5 of 10)	410	NM_007155	7784	Hs.656137	NM_007155	ENSG00000188372	ZP3	ZP3A|ZP3B|ZPC|Zp-3	zona pellucida glycoprotein 3 (sperm receptor)	protein-coding
MACS_peak_25	chr1	17222993	17223227	+	50.88	NA	Intergenic	MER45B|DNA|hAT-Tip100	-25335	NM_014675	9696	Hs.309403	NM_014675	ENSG00000058453	CROCC	ROLT	ciliary rootlet coiled-coil, rootletin	protein-coding
MACS_peak_1442	chr9	111557376	111557593	+	50.87	NA	Intergenic	MER52-int|LTR|ERV1	60791	NM_006686	10880	Hs.534390	NM_006686		ACTL7B	Tact1	actin-like 7B	protein-coding
MACS_peak_823	chr2	216847326	216847525	+	50.84	NA	intron (NM_018000, intron 2 of 4)	intron (NM_018000, intron 2 of 4)	30921	NM_018000	55686	Hs.620391	NM_018000	ENSG00000118242	MREG	DSU|WDT2	melanoregulin	protein-coding
MACS_peak_1459	chr9	130268484	130268646	+	50.81	NA	3' UTR (NM_022833, exon 14 of 14)	3' UTR (NM_022833, exon 14 of 14)	54031	NM_001005374	90678	Hs.495188	NM_138361	ENSG00000148356	LRSAM1	CMT2P|RIFLE|TAL	leucine rich repeat and sterile alpha motif containing 1	protein-coding
MACS_peak_646	chr17	65791811	65792218	+	50.81	NA	Intergenic	MLT1J2|LTR|ERVL-MaLR	-29766	NM_004459	2186	Hs.444200	NM_004459	ENSG00000171634	BPTF	FAC1|FALZ|NURF301	bromodomain PHD finger transcription factor	protein-coding
MACS_peak_1036	chr3	143160726	143160948	+	50.78	NA	intron (NM_173653, intron 12 of 15)	(TCCA)n|Simple_repeat|Simple_repeat	99749	NR_048544	100885796	Hs.581618	NR_048544	ENSG00000240012	SLC9A9-AS1	-	SLC9A9 antisense RNA 1	ncRNA
MACS_peak_492	chr16	14417273	14417495	+	50.78	NA	intron (NR_132983, intron 1 of 1)	MLT1D|LTR|ERVL-MaLR	14242	NR_029854	100126355		NR_029854		MIR365A	MIR365-1|MIRN365-1|hsa-mir-365a|mir-365a	microRNA 365a	ncRNA
MACS_peak_348	chr14	70248254	70248476	+	50.77	NA	intron (NM_003049, intron 2 of 4)	intron (NM_003049, intron 2 of 4)	-13935	NR_029378	100289511	Hs.729250	NR_029378		LOC100289511	-	uncharacterized LOC100289511	ncRNA
MACS_peak_829	chr2	231870131	231870363	+	50.76	NA	intron (NM_139073, intron 4 of 4)	HAL1-2a_MD|LINE|L1	9408	NM_139073	130560	Hs.745178	NM_139073	ENSG00000173699	SPATA3	TSARG1	spermatogenesis associated 3	protein-coding
MACS_peak_1455	chr9	125729399	125729672	+	50.75	NA	intron (NM_012197, intron 2 of 25)	L2a|LINE|L2	26247	NM_012197	23637	Hs.271341	NM_012197	ENSG00000011454	RABGAP1	GAPCENA|TBC1D11	RAB GTPase activating protein 1	protein-coding
MACS_peak_912	chr20	60468253	60468463	+	50.74	NA	intron (NM_001794, intron 7 of 15)	(TGGA)n|Simple_repeat|Simple_repeat	60360	NR_031658	100302168		NR_031658	ENSG00000221417	MIR1257	MIRN1257|hsa-mir-1257	microRNA 1257	ncRNA
MACS_peak_925	chr20	61944746	61944942	+	50.72	NA	intron (NM_020882, intron 17 of 35)	intron (NM_020882, intron 17 of 35)	20306	NM_020882	57642	Hs.271285	NM_020882	ENSG00000101203	COL20A1	bA261N11.4	collagen, type XX, alpha 1	protein-coding
MACS_peak_1361	chr8	102374451	102374936	+	50.72	NA	Intergenic	(CCCA)n|Simple_repeat|Simple_repeat	-6428	NR_002182	83955	Hs.567608	NM_032031	ENSG00000228224	NACAP1	FKSG17	nascent-polypeptide-associated complex alpha polypeptide pseudogene 1	pseudo
MACS_peak_75	chr1	186802097	186802299	+	50.71	NA	intron (NM_001311193, intron 1 of 15)	intron (NM_001311193, intron 1 of 15)	4166	NM_001311193	5321	Hs.497200	NM_024420	ENSG00000116711	PLA2G4A	PLA2G4|cPLA2|cPLA2-alpha	phospholipase A2, group IVA (cytosolic, calcium-dependent)	protein-coding
MACS_peak_1097	chr4	9693319	9693500	+	50.70	NA	Intergenic	CpG	-89849	NM_000798	1816	Hs.380681	NM_000798	ENSG00000169676	DRD5	DBDR|DRD1B|DRD1L2	dopamine receptor D5	protein-coding
MACS_peak_621	chr17	26972162	26972458	+	50.68	NA	promoter-TSS (NM_014680)	promoter-TSS (NM_014680)	-133	NM_014680	9703	Hs.151761	NM_014680	ENSG00000007202	KIAA0100	BCOX|BCOX1|CT101	KIAA0100	protein-coding
MACS_peak_84	chr1	205432704	205432922	+	50.68	NA	Intergenic	L2a|LINE|L2	-7599	NR_103783	101669762	Hs.666219	NR_103783		BLACAT1	LINC00912|linc-UBC1|onco-lncRNA-30	bladder cancer associated transcript 1 (non-protein coding)	ncRNA
MACS_peak_336	chr14	21079890	21080064	+	50.66	NA	Intergenic	L2a|LINE|L2	-20995	NM_001024822	493901	Hs.729466	NM_001024822	ENSG00000258436	RNASE12	HEL-S-85p|RAI1	ribonuclease, RNase A family, 12 (non-active)	protein-coding
MACS_peak_223	chr11	82611650	82611984	+	50.63	NA	promoter-TSS (NM_005040)	promoter-TSS (NM_005040)	-260	NM_005040	5547	Hs.523936	NM_005040	ENSG00000137509	PRCP	HUMPCP|PCP	prolylcarboxypeptidase	protein-coding
MACS_peak_254	chr12	79221340	79221581	+	50.63	NA	Intergenic	L1PREC2|LINE|L1	-36313	NM_001135805	6857	Hs.310545	NM_005639	ENSG00000067715	SYT1	P65|SVP65|SYT	synaptotagmin I	protein-coding
MACS_peak_828	chr2	228380266	228380489	+	50.60	NA	intron (NM_004504, intron 2 of 12)	L2|LINE|L2	43489	NM_001135189	3267	Hs.352962	NM_004504	ENSG00000173744	AGFG1	HRB|RAB|RIP	ArfGAP with FG repeats 1	protein-coding
MACS_peak_1341	chr8	9996971	9997194	+	50.60	NA	intron (NM_001199729, intron 2 of 6)	L1PB4|LINE|L1	44020	NM_001135671	4482	Hs.490981	NM_012331	ENSG00000175806	MSRA	PMSR	methionine sulfoxide reductase A	protein-coding
MACS_peak_831	chr2	238366305	238366522	+	50.59	NA	Intergenic	(TGGG)n|Simple_repeat|Simple_repeat	-28640	NM_001281474	79083	Hs.102406	NM_024101	ENSG00000115648	MLPH	SLAC2-A	melanophilin	protein-coding
MACS_peak_1046	chr3	169504637	169504900	+	50.59	NA	non-coding (NR_033702, exon 8 of 8)	non-coding (NR_033702, exon 8 of 8)	12715	NM_001185119	55892	Hs.507025	NM_018657	ENSG00000085274	MYNN	OSZF|SBBIZ1|ZBTB31|ZNF902	myoneurin	protein-coding
MACS_peak_73	chr1	176196719	176196948	+	50.57	NA	Intergenic	LTR54|LTR|ERV1	-20453	NM_022457	64326	Hs.523744	NM_022457	ENSG00000143207	RFWD2	COP1|RNF200	ring finger and WD repeat domain 2, E3 ubiquitin protein ligase	protein-coding
MACS_peak_1443	chr9	111830263	111830472	+	50.57	NA	intron (NM_032012, intron 9 of 17)	AluY|SINE|Alu	-21789	NR_029506	407036		NR_029506	ENSG00000207698	MIR32	MIRN32|hsa-mir-32|miR-32|miRNA32	microRNA 32	ncRNA
MACS_peak_1513	chr9	141023475	141023686	+	50.54	NA	Intergenic	(TTAGGG)n|Simple_repeat|Simple_repeat	-20985	NR_027156	643224	Hs.551805	NR_027156		TUBBP5	-	tubulin, beta pseudogene 5	pseudo
MACS_peak_1038	chr3	143938317	143938499	+	50.50	NA	Intergenic	L1M5|LINE|L1	246241	NM_001134470	205428	Hs.288954	NM_173552	ENSG00000181744	C3orf58	DIA1|GoPro49|HASF	chromosome 3 open reading frame 58	protein-coding
MACS_peak_1408	chr8	145550220	145550402	+	50.50	NA	5' UTR (NM_012079, exon 1 of 17)	5' UTR (NM_012079, exon 1 of 17)	271	NM_012079	8694	Hs.521954	NM_012079	ENSG00000185000	DGAT1	ARAT|ARGP1|DGAT|DIAR7	diacylglycerol O-acyltransferase 1	protein-coding
MACS_peak_711	chr19	38800951	38801133	+	50.50	NA	intron (NM_001039673, intron 1 of 7)	(TCCA)n|Simple_repeat|Simple_repeat	5403	NM_001145461	90522	Hs.280741	NM_033557		YIF1B	FinGER8	Yip1 interacting factor homolog B (S. cerevisiae)	protein-coding
MACS_peak_809	chr2	155025871	155026053	+	50.50	NA	intron (NM_001301627, intron 2 of 11)	MER63A|DNA|hAT-Blackjack	225055	NM_001301627	114805	Hs.470277	NM_052917	ENSG00000144278	GALNT13	GalNAc-T13	polypeptide N-acetylgalactosaminyltransferase 13	protein-coding
MACS_peak_1256	chr7	483433	483615	+	50.50	NA	Intergenic	(TGGA)n|Simple_repeat|Simple_repeat	64133	NR_033960	442497	Hs.704269	NR_033960	ENSG00000249574	LOC442497	-	uncharacterized LOC442497	ncRNA
MACS_peak_21	chr1	16002361	16002543	+	50.50	NA	Intergenic	(CCTA)n|Simple_repeat|Simple_repeat	-8375	NM_015164	23207	Hs.646775	NM_015164	ENSG00000116786	PLEKHM2	SKIP	pleckstrin homology domain containing, family M (with RUN domain) member 2	protein-coding
MACS_peak_992	chr3	13066063	13066282	+	50.48	NA	intron (NM_001134382, intron 1 of 14)	(TCCA)n|Simple_repeat|Simple_repeat	48445	NM_001134382	9922	Hs.475506	NM_014869	ENSG00000144711	IQSEC1	ARF-GEP100|ARFGEP100|BRAG2|GEP100	IQ motif and Sec7 domain 1	protein-coding
MACS_peak_18	chr1	11099841	11100065	+	50.43	NA	intron (NM_006610, intron 6 of 10)	(TGGA)n|Simple_repeat|Simple_repeat	7343	NM_006610	10747	Hs.655645	NM_006610	ENSG00000009724	MASP2	MAP19|MASP-2|MASP1P1|sMAP	mannan-binding lectin serine peptidase 2	protein-coding
MACS_peak_597	chr17	2582717	2582941	+	50.43	NA	intron (NM_000430, intron 9 of 10)	(TGGA)n|Simple_repeat|Simple_repeat	13384	NR_106834	102465465		NR_106834	ENSG00000273606	MIR6776	hsa-mir-6776	microRNA 6776	ncRNA
MACS_peak_901	chr20	57602225	57602572	+	50.43	NA	TTS (NM_030773)	TTS (NM_030773)	5024	NM_006886	514	Hs.177530	NM_006886		ATP5E	ATPE|MC5DN3	ATP synthase, H+ transporting, mitochondrial F1 complex, epsilon subunit	protein-coding
MACS_peak_647	chr17	66678572	66679004	+	50.42	NA	Intergenic	(TCCA)n|Simple_repeat|Simple_repeat	54493	NR_110825	101928104	Hs.569826	NR_110825	ENSG00000267659	LINC01482	-	long intergenic non-protein coding RNA 1482	ncRNA
MACS_peak_559	chr16	86588786	86589040	+	50.36	NA	promoter-TSS (NM_001159380)	promoter-TSS (NM_001159380)	-13	NR_026674	146512	Hs.97422	NM_153017	ENSG00000280278	FLJ30679	-	uncharacterized protein FLJ30679	ncRNA
MACS_peak_811	chr2	158880002	158880224	+	50.32	NA	intron (NM_001135098, intron 2 of 8)	MIR3|SINE|MIR	28422	NM_001135098	151531	Hs.128427	NM_173355	ENSG00000007001	UPP2	UDRPASE2|UP2|UPASE2	uridine phosphorylase 2	protein-coding
MACS_peak_1003	chr3	19771659	19771863	+	50.32	NA	Intergenic	AluY|SINE|Alu	203945	NM_144715	151651	Hs.733920	NM_144715	ENSG00000163576	EFHB	CFAP21	EF-hand domain family, member B	protein-coding
MACS_peak_1052	chr3	186435834	186436017	+	50.29	NA	intron (NM_001102416, intron 1 of 9)	(CCA)n|Simple_repeat|Simple_repeat	827	NM_000893	3827	Hs.77741	NM_000893		KNG1	BDK|BK|KNG	kininogen 1	protein-coding
MACS_peak_1153	chr5	115694267	115694450	+	50.29	NA	Intergenic	Intergenic	15909	NR_104675	101927190	Hs.639849	NR_104675		LOC101927190	-	uncharacterized LOC101927190	ncRNA
MACS_peak_1347	chr8	47457413	47457596	+	50.29	NA	Intergenic	LTR52|LTR|ERVL	-295004	NR_027012	497634	Hs.406982	NR_027012	ENSG00000253314	LINC00293	BEYLA|NCRNA00293	long intergenic non-protein coding RNA 293	ncRNA
MACS_peak_1258	chr7	497261	497444	+	50.29	NA	Intergenic	Intergenic	62129	NM_002607	5154	Hs.535898	NM_002607	ENSG00000197461	PDGFA	PDGF-A|PDGF1	platelet-derived growth factor alpha polypeptide	protein-coding
MACS_peak_602	chr17	14202680	14202863	+	50.29	NA	Intergenic	CpG	-1596	NM_006041	9953	Hs.48384	NM_006041	ENSG00000125430	HS3ST3B1	3-OST-3B|3OST3B1|h3-OST-3B	heparan sulfate (glucosamine) 3-O-sulfotransferase 3B1	protein-coding
MACS_peak_982	chr22	33386327	33386510	+	50.29	NA	intron (NM_133633, intron 1 of 11)	(TCCA)n|Simple_repeat|Simple_repeat	16388	NM_133633	8224	Hs.608750	NM_003490	ENSG00000185666	SYN3	-	synapsin III	protein-coding
MACS_peak_1417	chr9	86713411	86713636	+	50.25	NA	Intergenic	Intergenic	35165	NR_110995	101927575	Hs.459826	NR_110995	ENSG00000227463	LOC101927575	-	uncharacterized LOC101927575	ncRNA
MACS_peak_879	chr20	50385187	50385773	+	50.23	NA	promoter-TSS (NM_006045)	promoter-TSS (NM_006045)	-530	NM_006045	10079	Hs.649234	NM_006045	ENSG00000054793	ATP9A	ATPIIA	ATPase, class II, type 9A	protein-coding
MACS_peak_329	chr13	36113121	36113291	+	50.22	NA	intron (NM_001204197, intron 1 of 17)	intron (NM_001204197, intron 1 of 17)	62320	NM_001204197	26960	Hs.491172	NM_015678	ENSG00000172915	NBEA	BCL8B|LYST2	neurobeachin	protein-coding
MACS_peak_1148	chr5	81224881	81225046	+	50.19	NA	Intergenic	Intergenic	-42881	NM_031482	83734	Hs.713698	NM_031482		ATG10	APG10|APG10L|pp12616	autophagy related 10	protein-coding
MACS_peak_1064	chr3	196483864	196484115	+	50.19	NA	intron (NM_002577, intron 1 of 14)	LTR10A|LTR|ERV1	17261	NM_002577	5062	Hs.518530	NM_002577	ENSG00000180370	PAK2	PAK65|PAKgamma	p21 protein (Cdc42/Rac)-activated kinase 2	protein-coding
MACS_peak_603	chr17	16284398	16284609	+	50.17	NA	promoter-TSS (NM_001281720)	promoter-TSS (NM_001281720)	92	NM_001281720	7314	Hs.356190	NM_018955	ENSG00000170315	UBB	HEL-S-50	ubiquitin B	protein-coding
MACS_peak_246	chr12	51894419	51894624	+	50.13	NA	intron (NM_001039960, intron 22 of 24)	AluYf4|SINE|Alu	75620	NM_001258403	9498	Hs.4749	NM_004858	ENSG00000050438	SLC4A8	NBC3|NDCBE	solute carrier family 4, sodium bicarbonate cotransporter, member 8	protein-coding
MACS_peak_340	chr14	30164334	30164479	+	50.09	NA	intron (NM_002742, intron 2 of 17)	AluSq|SINE|Alu	10202	NR_039672	100616347		NR_039672	ENSG00000265226	MIR548AI	-	microRNA 548ai	ncRNA
MACS_peak_483	chr16	8805466	8805650	+	50.09	NA	intron (NM_020686, intron 1 of 15)	(TGGA)n|Simple_repeat|Simple_repeat	-1268	NM_000663	18	Hs.336768	NM_000663	ENSG00000183044	ABAT	GABA-AT|GABAT|NPD009	4-aminobutyrate aminotransferase	protein-coding
MACS_peak_303	chr12	131877743	131877927	+	50.09	NA	Intergenic	(GTGTG)n|Simple_repeat|Simple_repeat	45820	NR_103736	338797	Hs.592007	NM_001025466		LOC338797	-	uncharacterized LOC338797	ncRNA
MACS_peak_1453	chr9	123847621	123847793	+	50.09	NA	Intergenic	Intergenic	-2867	NM_007018	11064	Hs.653263	NM_007018	ENSG00000119397	CNTRL	CEP1|CEP110|FAN|bA165P4.1	centriolin	protein-coding
MACS_peak_308	chr12	132072841	132073294	+	50.09	NA	Intergenic	(GAATG)n|Simple_repeat|Simple_repeat	-122565	NM_004592	6433	Hs.308171	NM_004592	ENSG00000061936	SFSWAP	SFRS8|SWAP	splicing factor, suppressor of white-apricot family	protein-coding
MACS_peak_1028	chr3	126234287	126234471	+	50.09	NA	intron (NM_144639, intron 1 of 19)	C-rich|Low_complexity|Low_complexity	2237	NM_001165974	131669	Hs.331148	NM_144639	ENSG00000159650	UROC1	HMFN0320|UROCD	urocanate hydratase 1	protein-coding
MACS_peak_612	chr17	19107813	19107997	+	50.08	NA	Intergenic	(TGGG)n|Simple_repeat|Simple_repeat	-14790	NM_001291904	79999	Hs.677375	NM_024934		LOC79999	-	uncharacterized LOC79999	protein-coding
MACS_peak_1043	chr3	159464967	159465151	+	50.08	NA	intron (NM_001197108, intron 1 of 6)	intron (NM_001197108, intron 1 of 6)	21342	NR_121669	100874433	Hs.601476	NR_121669		IQCJ-SCHIP1-AS1	uaz98	IQCJ-SCHIP1 readthrough antisense RNA 1	ncRNA
MACS_peak_524	chr16	31724963	31725147	+	50.08	NA	intron (NM_001130913, intron 1 of 4)	CpG	505	NM_001130913	124411	Hs.528826	NM_001004300	ENSG00000197302	ZNF720	-	zinc finger protein 720	protein-coding
MACS_peak_503	chr16	22528692	22528876	+	50.08	NA	intron (NM_001135865, intron 1 of 6)	intron (NM_001135865, intron 1 of 6)	3940	NM_001135865	100132247	Hs.611072	NM_001135865	ENSG00000243716	NPIPB5	-	nuclear pore complex interacting protein family, member B5	protein-coding
MACS_peak_87	chr1	207721491	207721712	+	50.07	NA	intron (NM_000651, intron 16 of 46)	L1PA5|LINE|L1	52128	NM_000573	1378	Hs.334019	NM_000573	ENSG00000203710	CR1	C3BR|C4BR|CD35|KN	complement component (3b/4b) receptor 1 (Knops blood group)	protein-coding
MACS_peak_765	chr2	42422632	42422801	+	50.06	NA	intron (NM_019063, intron 1 of 22)	intron (NM_019063, intron 1 of 22)	-25345	NR_110584	102723824	Hs.639826	NR_110584		LOC102723824	-	uncharacterized LOC102723824	ncRNA
MACS_peak_214	chr11	73281030	73281242	+	50.02	NA	intron (NM_001286050, intron 1 of 8)	intron (NM_001286050, intron 1 of 8)	28098	NM_001286051	23201	Hs.475334	NM_015159	ENSG00000054965	FAM168A	KIAA0280|TCRP1	family with sequence similarity 168, member A	protein-coding

## Sheet: WT_E2_30min
Peak ID	Chr	Start	End	Strand	Peak Score	Focus Ratio/Region Size	Annotation	Detailed Annotation	Distance to TSS	Nearest PromoterID	Entrez ID	Nearest Unigene	Nearest Refseq	Nearest Ensembl	Gene Name	Gene Alias	Gene Description	Gene Type
MACS_peak_9432	chr9	111240732	111241851	+	3233.06	NA	Intergenic	MamRep605|Unknown|Unknown	376984	NM_006686	10880	Hs.534390	NM_006686		ACTL7B	Tact1	actin-like 7B	protein-coding
MACS_peak_2735	chr14	104159553	104160424	+	3218.91	NA	intron (NM_001130107, intron 14 of 15)	intron (NM_001130107, intron 14 of 15)	21835	NM_001100118	7517	Hs.592325	NM_005432	ENSG00000126215	XRCC3	CMM6	X-ray repair complementing defective repair in Chinese hamster cells 3	protein-coding
MACS_peak_3555	chr16	85499453	85500183	+	3213.33	NA	Intergenic	Intergenic	-145211	NM_001134473	23199	Hs.461647	NM_014615	ENSG00000131149	GSE1	KIAA0182	Gse1 coiled-coil protein	protein-coding
MACS_peak_1581	chr11	76483403	76484201	+	3200.58	NA	Intergenic	Intergenic	-9555	NM_001258210	25987	Hs.8361	NM_015516	ENSG00000182704	TSKU	E2IG4|LRRC54|TSK	tsukushi, small leucine rich proteoglycan	protein-coding
MACS_peak_147	chr1	17846782	17847476	+	3187.62	NA	Intergenic	Intergenic	-19201	NM_018125	55160	Hs.443460	NM_018125	ENSG00000074964	ARHGEF10L	GrinchGEF	Rho guanine nucleotide exchange factor 10 like	protein-coding
MACS_peak_3059	chr15	93187445	93189380	+	3162.16	NA	intron (NM_207446, intron 1 of 2)	intron (NM_207446, intron 1 of 2)	10619	NM_207446	400451	Hs.27373	NM_207446	ENSG00000185442	FAM174B	-	family with sequence similarity 174, member B	protein-coding
MACS_peak_2256	chr13	39258571	39259414	+	3115.78	NA	intron (NR_126377, intron 1 of 2)	intron (NR_126377, intron 1 of 2)	1820	NR_126377	101929121	Hs.618449	NR_126377		LINC00437	TCONS_00021639	long intergenic non-protein coding RNA 437	ncRNA
MACS_peak_7433	chr5	132584894	132585952	+	3100.00	NA	intron (NM_015082, intron 6 of 15)	Charlie4z|DNA|hAT-Charlie	177975	NR_031621	100302134		NR_031621	ENSG00000221287	MIR1289-2	MIRN1289-2|hsa-mir-1289-2	microRNA 1289-2	ncRNA
MACS_peak_791	chr10	5701749	5702688	+	3100.00	NA	intron (NR_024581, intron 1 of 4)	intron (NR_024581, intron 1 of 4)	6340	NR_037164	79754	Hs.445899	NM_024701	ENSG00000196372	ASB13	-	ankyrin repeat and SOCS box containing 13	protein-coding
MACS_peak_6591	chr3	161057218	161058251	+	3100.00	NA	Intergenic	L1PA17|LINE|L1	32137	NM_001040100	165679	Hs.369104	NM_145035		SPTSSB	ADMP|C3orf57|SSSPTB	serine palmitoyltransferase, small subunit B	protein-coding
MACS_peak_9697	chr9	140408264	140409539	+	3100.00	NA	intron (NM_152286, intron 11 of 33)	intron (NM_152286, intron 11 of 33)	36120	NM_152286	375775	Hs.294147	NM_152286	ENSG00000130653	PNPLA7	C9orf111|NTE-R1|NTEL1	patatin-like phospholipase domain containing 7	protein-coding
MACS_peak_597	chr1	202075224	202078249	+	3100.00	NA	Intergenic	Intergenic	-15293	NM_004767	9283	Hs.132049	NM_004767		GPR37L1	ET(B)R-LP-2|ETBR-LP-2	G protein-coupled receptor 37 like 1	protein-coding
MACS_peak_6058	chr22	29215214	29216128	+	3100.00	NA	Intergenic	Intergenic	-19111	NM_005080	7494	Hs.437638	NM_005080	ENSG00000100219	XBP1	TREB-5|TREB5|XBP-1|XBP2	X-box binding protein 1	protein-coding
MACS_peak_4689	chr2	11638510	11639251	+	3100.00	NA	Intergenic	Intergenic	-32577	NM_001278277	1876	Hs.603093	NM_198256	ENSG00000169016	E2F6	E2F-6	E2F transcription factor 6	protein-coding
MACS_peak_3615	chr16	88993288	88994484	+	3100.00	NA	intron (NM_005187, intron 1 of 11)	intron (NM_005187, intron 1 of 11)	-12561	NM_001290330	100129697	Hs.689377	NM_001290330		LOC100129697	-	uncharacterized LOC100129697	protein-coding
MACS_peak_2105	chr12	122186461	122187323	+	3100.00	NA	intron (NM_001080825, intron 3 of 11)	intron (NM_001080825, intron 3 of 11)	36234	NM_001080825	144404	Hs.644504	NM_001080825	ENSG00000188735	TMEM120B	-	transmembrane protein 120B	protein-coding
MACS_peak_6547	chr3	150454868	150455553	+	3100.00	NA	intron (NR_121657, intron 1 of 2)	intron (NR_121657, intron 1 of 2)	1562	NR_121657	101928105		NR_121657		LOC101928105	-	uncharacterized LOC101928105	ncRNA
MACS_peak_2180	chr12	132345118	132345824	+	3100.00	NA	Intergenic	Intergenic	32530	NM_016155	4326	Hs.709245	NM_016155	ENSG00000198598	MMP17	MT4-MMP	matrix metallopeptidase 17 (membrane-inserted)	protein-coding
MACS_peak_6013	chr21	47712275	47714883	+	3100.00	NA	intron (NM_001314023, intron 3 of 4)	intron (NM_001314023, intron 3 of 4)	7335	NM_001314024	54059	Hs.474066	NM_058181	ENSG00000182362	YBEY	C21orf57	ybeY metallopeptidase (putative)	protein-coding
MACS_peak_7543	chr5	167743055	167743812	+	3100.00	NA	intron (NM_015238, intron 1 of 22)	intron (NM_015238, intron 1 of 22)	24368	NM_001161662	23286	Hs.484047	NM_015238	ENSG00000113645	WWC1	HBEBP3|HBEBP36|KIBRA|MEMRYQTL|PPP1R168	WW and C2 domain containing 1	protein-coding
MACS_peak_889	chr10	29413597	29414479	+	3100.00	NA	Intergenic	Intergenic	-163952	NM_032517	84569	Hs.558572	NM_032517	ENSG00000120563	LYZL1	KAAG648|LYC2|PRO1278|bA534G20.1	lysozyme-like 1	protein-coding
MACS_peak_3823	chr17	38732112	38733022	+	3100.00	NA	Intergenic	LTR33A|LTR|ERVL	-10831	NM_001301714	1236	Hs.370036	NM_001838	ENSG00000126353	CCR7	BLR2|CC-CKR-7|CCR-7|CD197|CDw197|CMKBR7|EBI1	chemokine (C-C motif) receptor 7	protein-coding
MACS_peak_780	chr10	5538279	5539138	+	3100.00	NA	Intergenic	Intergenic	2825	NM_017422	51806	Hs.180142	NM_017422	ENSG00000178372	CALML5	CLSP	calmodulin-like 5	protein-coding
MACS_peak_7119	chr5	9958	12030	+	3100.00	NA	Intergenic	(CCCTAA)n|Simple_repeat|Simple_repeat	-129379	NM_052909	153478	Hs.535800	NM_052909	ENSG00000153404	PLEKHG4B	-	pleckstrin homology domain containing, family G (with RhoGef domain) member 4B	protein-coding
MACS_peak_6057	chr22	29209519	29210405	+	3100.00	NA	Intergenic	Intergenic	-13402	NM_005080	7494	Hs.437638	NM_005080	ENSG00000100219	XBP1	TREB-5|TREB5|XBP-1|XBP2	X-box binding protein 1	protein-coding
MACS_peak_2628	chr14	93483468	93484631	+	3100.00	NA	intron (NM_001142593, intron 3 of 10)	intron (NM_001142593, intron 3 of 10)	-49748	NR_002808	319085	Hs.612888	NR_002808	ENSG00000258730	ITPK1-AS1	C14orf85|ITPK1-AS|ITPK1AS|NCRNA00203	ITPK1 antisense RNA 1	ncRNA
MACS_peak_3183	chr16	4202027	4202859	+	3100.00	NA	Intergenic	Intergenic	-36257	NM_001116	115	Hs.391860	NM_001116	ENSG00000162104	ADCY9	AC9|ACIX	adenylate cyclase 9	protein-coding
MACS_peak_6721	chr3	193597106	193598190	+	3100.00	NA	Intergenic	L2b|LINE|L2	114379	NR_027764	100128023	Hs.730112	NR_027764		DPPA2P3	-	developmental pluripotency associated 2 pseudogene 3	pseudo
MACS_peak_4268	chr19	1181487	1182295	+	3100.00	NA	Intergenic	Intergenic	-7609	NM_014963	22904	Hs.408708	NM_014963	ENSG00000064932	SBNO2	KIAA0963|SNO|STNO	strawberry notch homolog 2 (Drosophila)	protein-coding
MACS_peak_9527	chr9	130784302	130785107	+	3100.00	NA	Intergenic	Intergenic	-41892	NM_001035254	399665	Hs.535972	NM_203305	ENSG00000167106	FAM102A	C9orf132|EEIG1|SYM-3A|bA203J24.7	family with sequence similarity 102, member A	protein-coding
MACS_peak_598	chr1	202081655	202082591	+	3100.00	NA	Intergenic	Intergenic	-9906	NM_004767	9283	Hs.132049	NM_004767		GPR37L1	ET(B)R-LP-2|ETBR-LP-2	G protein-coupled receptor 37 like 1	protein-coding
MACS_peak_6419	chr3	107717957	107718948	+	3100.00	NA	Intergenic	LTR39|LTR|ERV1	91483	NM_198793	961	Hs.446414	NM_001777	ENSG00000196776	CD47	IAP|MER6|OA3	CD47 molecule	protein-coding
MACS_peak_7644	chr6	1641373	1642104	+	3100.00	NA	intron (NM_001253846, intron 9 of 10)	intron (NM_001253846, intron 9 of 10)	31057	NM_001453	2296	Hs.348883	NM_001453	ENSG00000054598	FOXC1	ARA|FKHL7|FREAC-3|FREAC3|IGDA|IHG1|IRID1|RIEG3	forkhead box C1	protein-coding
MACS_peak_398	chr1	112055849	112056548	+	3100.00	NA	intron (NM_001081976, intron 1 of 5)	intron (NM_001081976, intron 1 of 5)	-9455	NM_001302678	140	Hs.281342	NM_000677	ENSG00000121933	ADORA3	A3AR	adenosine A3 receptor	protein-coding
MACS_peak_1271	chr11	1817341	1818265	+	3100.00	NA	Intergenic	Intergenic	-32581	NM_001909	1509	Hs.654447	NM_001909	ENSG00000117984	CTSD	CLN10|CPSD|HEL-S-130P	cathepsin D	protein-coding
MACS_peak_4022	chr17	72765642	72766641	+	3100.00	NA	TTS (NM_004252)	TTS (NM_004252)	6423	NM_001305086	26151	Hs.144058	NM_015654	ENSG00000109065	NAT9	EBSP, hNATL	N-acetyltransferase 9 (GCN5-related, putative)	protein-coding
MACS_peak_3616	chr16	88994488	88996279	+	3100.00	NA	intron (NM_005187, intron 1 of 11)	L2a|LINE|L2	-11064	NM_001290330	100129697	Hs.689377	NM_001290330		LOC100129697	-	uncharacterized LOC100129697	protein-coding
MACS_peak_1601	chr11	78770630	78771728	+	3100.00	NA	intron (NM_001098816, intron 6 of 33)	intron (NM_001098816, intron 6 of 33)	341974	NR_030598	100126333		NR_030598	ENSG00000211997	MIR708	MIRN708|hsa-mir-708	microRNA 708	ncRNA
MACS_peak_7378	chr5	105577033	105577789	+	3100.00	NA	Intergenic	LTR40b|LTR|ERVL	769304	NR_104671	102467213	Hs.570923	NR_104671	ENSG00000251027	LOC102467213	-	uncharacterized LOC102467213	ncRNA
MACS_peak_4696	chr2	11679530	11680254	+	3100.00	NA	promoter-TSS (NM_148903)	promoter-TSS (NM_148903)	-188	NM_148903	9687	Hs.467733	NM_014668	ENSG00000196208	GREB1	-	growth regulation by estrogen in breast cancer 1	protein-coding
MACS_peak_3070	chr15	96437226	96439464	+	3100.00	NA	Intergenic	Intergenic	-430812	NM_001145155	7026	Hs.347991	NM_021005	ENSG00000185551	NR2F2	ARP1|CHTD4|COUPTFB|COUPTFII|NF-E3|NR2F1|SVP40|TFCOUP2	nuclear receptor subfamily 2, group F, member 2	protein-coding
MACS_peak_5907	chr21	41696254	41697183	+	3100.00	NA	intron (NR_073202, intron 8 of 32)	intron (NR_073202, intron 8 of 32)	-58292	NR_038898	100506492	Hs.667053	NR_038896	ENSG00000235123	DSCAM-AS1	M41	DSCAM antisense RNA 1	ncRNA
MACS_peak_9529	chr9	130788980	130789766	+	3100.00	NA	Intergenic	Intergenic	40226	NM_197956	203245	Hs.373606	NM_197956	ENSG00000171169	NAIF1	C9orf90|bA379C10.2	nuclear apoptosis inducing factor 1	protein-coding
MACS_peak_7717	chr6	15221776	15222644	+	3100.00	NA	Intergenic	Intergenic	-23996	NM_004973	3720	Hs.269059	NM_004973	ENSG00000008083	JARID2	JMJ	jumonji, AT rich interactive domain 2	protein-coding
MACS_peak_3816	chr17	38604701	38605496	+	3100.00	NA	intron (NM_001552, intron 1 of 3)	intron (NM_001552, intron 1 of 3)	5422	NM_001552	3487	Hs.462998	NM_001552	ENSG00000141753	IGFBP4	BP-4|HT29-IGFBP|IBP4|IGFBP-4	insulin like growth factor binding protein 4	protein-coding
MACS_peak_7710	chr6	15036736	15037623	+	3100.00	NA	Intergenic	Intergenic	-209027	NM_004973	3720	Hs.269059	NM_004973	ENSG00000008083	JARID2	JMJ	jumonji, AT rich interactive domain 2	protein-coding
MACS_peak_3892	chr17	49021468	49022427	+	3100.00	NA	Intergenic	CpG	-76608	NM_001243877	10140	Hs.703321	NM_005749	ENSG00000141232	TOB1	APRO6|PIG49|TOB|TROB|TROB1	transducer of ERBB2, 1	protein-coding
MACS_peak_6212	chr3	14297918	14298635	+	3100.00	NA	Intergenic	LTR16A|LTR|ERVL	78048	NM_014463	27258	Hs.111632	NM_014463		LSM3	SMX4|USS2|YLR438C	LSM3 homolog, U6 small nuclear RNA and mRNA degradation associated	protein-coding
MACS_peak_6734	chr3	193876524	193877297	+	3100.00	NA	Intergenic	Intergenic	22979	NM_005524	3280	Hs.250666	NM_005524	ENSG00000114315	HES1	HES-1|HHL|HRY|bHLHb39	hes family bHLH transcription factor 1	protein-coding
MACS_peak_4875	chr2	73212785	73213824	+	3100.00	NA	intron (NM_144579, intron 10 of 13)	intron (NM_144579, intron 10 of 13)	68700	NM_004097	2016	Hs.516090	NM_004097	ENSG00000135638	EMX1	-	empty spiracles homeobox 1	protein-coding
MACS_peak_7483	chr5	139088208	139089360	+	3100.00	NA	Intergenic	Intergenic	37024	NR_105052	101929696	Hs.147408	NR_105052	ENSG00000249131	LOC101929696	-	uncharacterized LOC101929696	ncRNA
MACS_peak_4021	chr17	72756635	72757354	+	3100.00	NA	intron (NM_004252, intron 1 of 5)	MIRc|SINE|MIR	12242	NR_037409	100500847		NR_037409	ENSG00000264624	MIR3615	mir-3615	microRNA 3615	ncRNA
MACS_peak_1104	chr10	95194636	95195448	+	3100.00	NA	intron (NM_133337, intron 3 of 52)	MIR3|SINE|MIR	47032	NM_133337	26509	Hs.602086	NM_013451	ENSG00000138119	MYOF	FER1L3	myoferlin	protein-coding
MACS_peak_9064	chr8	128811981	128814173	+	3100.00	NA	intron (NR_003367, intron 1 of 8)	L2a|LINE|L2	4869	NR_031609	100302185		NR_031609	ENSG00000275264	MIR1204	hsa-mir-1204	microRNA 1204	ncRNA
MACS_peak_1882	chr12	53364995	53366781	+	3100.00	NA	Intergenic	Intergenic	-22238	NM_001256293	3856	Hs.533782	NM_002273	ENSG00000170421	KRT8	CARD2|CK-8|CK8|CYK8|K2C8|K8|KO	keratin 8, type II	protein-coding
MACS_peak_2072	chr12	116827969	116828862	+	3100.00	NA	Intergenic	MIRb|SINE|MIR	37708	NR_039683	100616309		NR_039683	ENSG00000264037	MIR4472-2	-	microRNA 4472-2	ncRNA
MACS_peak_4542	chr19	41426662	41427801	+	3100.00	NA	Intergenic	Intergenic	-2939	NR_001278	1556	Hs.529117	NR_001278	ENSG00000256612	CYP2B7P	CYP2B|CYP2B7|CYP2B7P1	cytochrome P450, family 2, subfamily B, polypeptide 7, pseudogene	pseudo
MACS_peak_4434	chr19	18557634	18558372	+	3100.00	NA	intron (NM_006532, intron 8 of 11)	intron (NM_006532, intron 8 of 11)	-8892	NM_001170938	51477	Hs.405873	NM_016368	ENSG00000105655	ISYNA1	INO1|INOS|IPS|IPS 1|IPS-1	inositol-3-phosphate synthase 1	protein-coding
MACS_peak_5833	chr21	16582144	16583105	+	3100.00	NA	Intergenic	Intergenic	-145498	NM_003489	8204	Hs.155017	NM_003489	ENSG00000180530	NRIP1	RIP140	nuclear receptor interacting protein 1	protein-coding
MACS_peak_7969	chr6	106582530	106583507	+	3100.00	NA	Intergenic	Intergenic	36281	NM_182907	639	Hs.436023	NM_001198	ENSG00000057657	PRDM1	BLIMP1|PRDI-BF1	PR domain containing 1, with ZNF domain	protein-coding
MACS_peak_1282	chr11	2189923	2191053	+	3100.00	NA	intron (NM_199292, intron 3 of 13)	intron (NM_199292, intron 3 of 13)	2547	NM_000360	7054	Hs.435609	NM_000360	ENSG00000180176	TH	DYT14|DYT5b|TYH	tyrosine hydroxylase	protein-coding
MACS_peak_4939	chr2	100253055	100253567	+	3100.00	NA	intron (NM_001025108, intron 12 of 23)	intron (NM_001025108, intron 12 of 23)	-146831	NM_001037872	51455	Hs.443077	NM_016316	ENSG00000135945	REV1	REV1L	REV1, DNA directed polymerase	protein-coding
MACS_peak_9067	chr8	128871506	128873050	+	3100.00	NA	intron (NR_003367, intron 1 of 8)	intron (NR_003367, intron 1 of 8)	64070	NR_031609	100302185		NR_031609	ENSG00000275264	MIR1204	hsa-mir-1204	microRNA 1204	ncRNA
MACS_peak_4518	chr19	39204922	39205679	+	3091.05	NA	intron (NM_004924, intron 9 of 20)	intron (NM_004924, intron 9 of 20)	29814	NM_144691	147968	Hs.731775	NM_144691	ENSG00000182472	CAPN12	-	calpain 12	protein-coding
MACS_peak_4001	chr17	70636368	70637170	+	3079.35	NA	promoter-TSS (NR_033876)	promoter-TSS (NR_033876)	-158	NR_033876	400619	Hs.447555	NR_033876	ENSG00000227036	LINC00511	LCAL5|onco-lncRNA-12	long intergenic non-protein coding RNA 511	ncRNA
MACS_peak_1283	chr11	2214330	2215033	+	3076.73	NA	Intergenic	Intergenic	20388	NR_039834	100616126		NR_039834	ENSG00000265258	MIR4686	-	microRNA 4686	ncRNA
MACS_peak_2607	chr14	90978445	90979412	+	3070.79	NA	Intergenic	Intergenic	57354	NR_033986	400238	Hs.131037	NR_033986	ENSG00000233208	LINC00642	-	long intergenic non-protein coding RNA 642	ncRNA
MACS_peak_2586	chr14	77866447	77867054	+	3051.96	NA	intron (NM_001113475, intron 5 of 5)	MER4A|LTR|ERV1	22649	NM_001113475	122945	Hs.97556	NM_138791	ENSG00000165555	NOXRED1	C14orf148	NADP-dependent oxidoreductase domain containing 1	protein-coding
MACS_peak_822	chr10	8767781	8768532	+	3046.52	NA	Intergenic	Intergenic	-171796	NR_131944	105755953	Hs.564146	NR_131944		LOC105755953	-	uncharacterized LOC105755953	ncRNA
MACS_peak_1553	chr11	72497196	72498005	+	2971.61	NA	intron (NM_006645, intron 1 of 6)	intron (NM_006645, intron 1 of 6)	3025	NR_039841	100616410		NR_039841	ENSG00000265064	MIR4692	-	microRNA 4692	ncRNA
MACS_peak_62	chr1	7507748	7508387	+	2967.69	NA	intron (NM_015215, intron 5 of 22)	intron (NM_015215, intron 5 of 22)	-323262	NM_004781	9341	Hs.66708	NM_004781	ENSG00000049245	VAMP3	CEB	vesicle associated membrane protein 3	protein-coding
MACS_peak_9652	chr9	138284120	138284997	+	2962.28	NA	Intergenic	Intergenic	49463	NM_173520	157927	Hs.559511	NM_173520		C9orf62	-	chromosome 9 open reading frame 62	protein-coding
MACS_peak_438	chr1	145726243	145727048	+	2962.06	NA	intron (NM_001302371, intron 68 of 89)	intron (NM_001302371, intron 68 of 89)	-1021	NM_001201325	5174	Hs.444751	NM_002614	ENSG00000174827	PDZK1	CAP70|CLAMP|NHERF-3|NHERF3|PDZD1	PDZ domain containing 1	protein-coding
MACS_peak_2632	chr14	93511111	93512038	+	2930.59	NA	intron (NM_001142593, intron 3 of 10)	intron (NM_001142593, intron 3 of 10)	-22223	NR_002808	319085	Hs.612888	NR_002808	ENSG00000258730	ITPK1-AS1	C14orf85|ITPK1-AS|ITPK1AS|NCRNA00203	ITPK1 antisense RNA 1	ncRNA
MACS_peak_8070	chr6	138903345	138904365	+	2928.84	NA	Intergenic	Intergenic	-10187	NM_020464	57224	Hs.652741	NM_020464	ENSG00000135540	NHSL1	C6orf63	NHS-like 1	protein-coding
MACS_peak_7419	chr5	128513149	128513878	+	2912.91	NA	Intergenic	L1MEf|LINE|L1	80132	NR_039776	100616175		NR_039776	ENSG00000264563	MIR4633	-	microRNA 4633	ncRNA
MACS_peak_2500	chr14	65584717	65585614	+	2898.52	NA	Intergenic	Intergenic	-15752	NR_073137	4149	Hs.285354	NM_002382	ENSG00000125952	MAX	bHLHd4	MYC associated factor X	protein-coding
MACS_peak_2818	chr15	39960595	39961228	+	2895.57	NA	intron (NM_152597, intron 10 of 11)	MIR3|SINE|MIR	87631	NM_003246	7057	Hs.164226	NM_003246		THBS1	THBS|THBS-1|TSP|TSP-1|TSP1	thrombospondin 1	protein-coding
MACS_peak_3610	chr16	88829615	88830511	+	2891.62	NA	intron (NM_001142864, intron 1 of 50)	intron (NM_001142864, intron 1 of 50)	20888	NR_120387	339059	Hs.449817	NR_120387	ENSG00000182376	LOC339059	-	uncharacterized LOC339059	ncRNA
MACS_peak_5422	chr2	238467456	238468264	+	2883.52	NA	Intergenic	Intergenic	-7357	NM_015893	51052	Hs.247710	NM_015893	ENSG00000071677	PRLH	PRH|PRRP	prolactin releasing hormone	protein-coding
MACS_peak_8	chr1	1008563	1010027	+	2882.53	NA	intron (NM_001205252, intron 1 of 1)	intron (NM_001205252, intron 1 of 1)	392	NM_001205252	401934	Hs.568137	NM_001205252		RNF223	-	ring finger protein 223	protein-coding
MACS_peak_1508	chr11	69706112	69707215	+	2868.56	NA	Intergenic	Intergenic	-72471	NM_005247	2248	Hs.37092	NM_005247		FGF3	HBGF-3|INT2	fibroblast growth factor 3	protein-coding
MACS_peak_2292	chr13	69260125	69261128	+	2866.67	NA	Intergenic	MER4A1_|LTR|ERV1	198831	NR_038878	338862		NR_038878	ENSG00000281778	LINC00550	-	long intergenic non-protein coding RNA 550	ncRNA
MACS_peak_3970	chr17	64947668	64949110	+	2837.41	NA	Intergenic	Intergenic	-12591	NM_014405	27092	Hs.514423	NM_014405	ENSG00000075461	CACNG4	-	calcium channel, voltage-dependent, gamma subunit 4	protein-coding
MACS_peak_2928	chr15	71388775	71389589	+	2834.36	NA	Intergenic	Intergenic	18657	NM_001102658	196993	Hs.646533	NM_001102658	ENSG00000225362	CT62	-	cancer/testis antigen 62	protein-coding
MACS_peak_9194	chr9	4866079	4866839	+	2819.27	NA	Intergenic	Intergenic	16162	NR_029836	406894		NR_029836	ENSG00000199065	MIR101-2	MIRN101-2|mir-101-2	microRNA 101-2	ncRNA
MACS_peak_2814	chr15	38885534	38886216	+	2804.39	NA	Intergenic	Intergenic	-28868	NM_001128602	10125	Hs.591127	NM_005739	ENSG00000172575	RASGRP1	CALDAG-GEFI|CALDAG-GEFII|RASGRP|V|hRasGRP1	RAS guanyl releasing protein 1 (calcium and DAG-regulated)	protein-coding
MACS_peak_368	chr1	108779636	108780940	+	2801.03	NA	intron (NM_001143989, intron 6 of 14)	intron (NM_001143989, intron 6 of 14)	6415	NM_001143989	148545	Hs.511849	NM_152488	ENSG00000196427	NBPF4	-	neuroblastoma breakpoint family, member 4	protein-coding
MACS_peak_7474	chr5	139022418	139023415	+	2798.02	NA	Intergenic	Intergenic	-5385	NM_016463	51523	Hs.744933	NM_016463	ENSG00000171604	CXXC5	CF5|HSPC195|RINF|WID	CXXC finger protein 5	protein-coding
MACS_peak_7273	chr5	66510698	66512386	+	2797.70	NA	Intergenic	Intergenic	-18925	NM_005582	4064	Hs.87205	NM_005582		CD180	LY64|Ly78|RP105	CD180 molecule	protein-coding
MACS_peak_8929	chr8	98776193	98777006	+	2794.91	NA	Intergenic	Intergenic	-11210	NM_018407	55353	Hs.492314	NM_018407	ENSG00000104341	LAPTM4B	LAPTM4beta|LC27	lysosomal protein transmembrane 4 beta	protein-coding
MACS_peak_6706	chr3	189560213	189561126	+	2765.24	NA	intron (NM_001114978, intron 4 of 12)	intron (NM_001114978, intron 4 of 12)	12958	NR_030642	100126340		NR_030642	ENSG00000216058	MIR944	MIRN944|hsa-mir-944|mir-944	microRNA 944	ncRNA
MACS_peak_5417	chr2	238404919	238405548	+	2755.84	NA	intron (NM_024101, intron 2 of 15)	intron (NM_024101, intron 2 of 15)	9371	NM_001281473	79083	Hs.102406	NM_024101	ENSG00000115648	MLPH	SLAC2-A	melanophilin	protein-coding
MACS_peak_2780	chr14	106069187	106070342	+	2735.62	NA	Intergenic	(CAGCT)n|Simple_repeat|Simple_repeat	-17689	NR_107059	102466889		NR_107059	ENSG00000277030	MIR8071-2	hsa-mir-8071-2	microRNA 8071-2	ncRNA
MACS_peak_2013	chr12	102090905	102091880	+	2735.03	NA	promoter-TSS (NM_020244)	promoter-TSS (NM_020244)	-25	NM_020244	56994	Hs.293077	NM_020244	ENSG00000111666	CHPT1	CPT|CPT1	choline phosphotransferase 1	protein-coding
MACS_peak_8033	chr6	125523178	125523917	+	2732.80	NA	intron (NM_001292026, intron 1 of 4)	intron (NM_001292026, intron 1 of 4)	48127	NM_001003395	7164	Hs.591347	NM_003287	ENSG00000111907	TPD52L1	D53|hD53	tumor protein D52-like 1	protein-coding
MACS_peak_6434	chr3	123050856	123051709	+	2721.74	NA	intron (NM_183357, intron 4 of 20)	intron (NM_183357, intron 4 of 20)	83907	NM_001199642	111	Hs.593292	NM_183357	ENSG00000173175	ADCY5	AC5|FDFM	adenylate cyclase 5	protein-coding
MACS_peak_9082	chr8	129153966	129154988	+	2710.05	NA	Intergenic	Intergenic	-7885	NR_031613	100302281		NR_031613	ENSG00000221261	MIR1208	MIRN1208|hsa-mir-1208	microRNA 1208	ncRNA
MACS_peak_3419	chr16	68741629	68742282	+	2706.28	NA	Intergenic	AluSx1|SINE|Alu	-29240	NM_004360	999	Hs.461086	NM_004360	ENSG00000039068	CDH1	Arc-1|CD324|CDHE|ECAD|LCAM|UVO	cadherin 1, type 1	protein-coding
MACS_peak_172	chr1	21568118	21568632	+	2692.83	NA	intron (NM_001113349, intron 9 of 17)	intron (NM_001113349, intron 9 of 17)	37808	NM_001113347	1889	Hs.195080	NM_001397	ENSG00000117298	ECE1	ECE	endothelin converting enzyme 1	protein-coding
MACS_peak_2453	chr14	50459448	50460225	+	2681.74	NA	promoter-TSS (NR_126499)	promoter-TSS (NR_126499)	16	NR_126499	283551	Hs.292580	NM_001012706	ENSG00000214900	LINC01588	C14orf182	long intergenic non-protein coding RNA 1588	ncRNA
MACS_peak_265	chr1	42255206	42255991	+	2677.91	NA	intron (NM_024503, intron 1 of 8)	intron (NM_024503, intron 1 of 8)	128780	NM_024503	59269	Hs.403972	NM_024503	ENSG00000127124	HIVEP3	KBP-1|KBP1|KRC|SHN3|Schnurri-3|ZAS3|ZNF40C	human immunodeficiency virus type I enhancer binding protein 3	protein-coding
MACS_peak_1493	chr11	69329790	69330665	+	2666.80	NA	Intergenic	Intergenic	29898	NR_120545	101928292	Hs.736219	NR_120542		LINC01488	BRCAT8	long intergenic non-protein coding RNA 1488	ncRNA
MACS_peak_4937	chr2	100226073	100226888	+	2641.09	NA	intron (NM_001025108, intron 12 of 23)	LTR7C|LTR|ERV1	-120000	NM_001037872	51455	Hs.443077	NM_016316	ENSG00000135945	REV1	REV1L	REV1, DNA directed polymerase	protein-coding
MACS_peak_1526	chr11	70651772	70652551	+	2639.62	NA	intron (NM_012309, intron 10 of 22)	intron (NM_012309, intron 10 of 22)	-56734	NR_073536	220070	Hs.326766	NM_145308	ENSG00000171671	SHANK2-AS3	C11orf76	SHANK2 antisense RNA 3	ncRNA
MACS_peak_5989	chr21	46749998	46750867	+	2625.05	NA	Intergenic	Intergenic	11473	NR_103811	388830	Hs.592162	NR_103811	ENSG00000237664	LINC00316	C21orf111|NCRNA00316|PRED59	long intergenic non-protein coding RNA 316	ncRNA
MACS_peak_1540	chr11	71192266	71193016	+	2624.91	NA	intron (NM_018161, intron 12 of 20)	intron (NM_018161, intron 12 of 20)	8092	NR_106812	102466728		NR_106812	ENSG00000278349	MIR6754	hsa-mir-6754	microRNA 6754	ncRNA
MACS_peak_7776	chr6	30719142	30719890	+	2609.09	NA	Intergenic	Intergenic	-7189	NM_003897	8870	Hs.76095	NM_003897	ENSG00000137331	IER3	DIF-2|DIF2|GLY96|IEX-1|IEX-1L|IEX1|PRG1	immediate early response 3	protein-coding
MACS_peak_6437	chr3	123128300	123129287	+	2605.32	NA	intron (NM_183357, intron 1 of 20)	intron (NM_183357, intron 1 of 20)	6396	NM_001199642	111	Hs.593292	NM_183357	ENSG00000173175	ADCY5	AC5|FDFM	adenylate cyclase 5	protein-coding
MACS_peak_3815	chr17	38478024	38479002	+	2601.08	NA	intron (NM_001145302, intron 1 of 6)	intron (NM_001145302, intron 1 of 6)	4040	NM_001145301	5914	Hs.654583	NM_000964	ENSG00000131759	RARA	NR1B1|RAR	retinoic acid receptor, alpha	protein-coding
MACS_peak_1680	chr11	117928415	117929172	+	2592.16	NA	intron (NR_038318, intron 2 of 3)	Charlie13b|DNA|hAT-Charlie	-18934	NM_019894	56649	Hs.161985	NM_019894	ENSG00000137648	TMPRSS4	CAPH2|MT-SP2|TMPRSS3	transmembrane protease, serine 4	protein-coding
MACS_peak_5936	chr21	43786362	43787279	+	2590.15	NA	promoter-TSS (NM_003225)	promoter-TSS (NM_003225)	-176	NM_003225	7031	Hs.162807	NM_003225	ENSG00000160182	TFF1	BCEI|D21S21|HP1.A|HPS2|pNR-2|pS2	trefoil factor 1	protein-coding
MACS_peak_9622	chr9	137251087	137251752	+	2575.24	NA	intron (NM_002957, intron 1 of 9)	intron (NM_002957, intron 1 of 9)	-19722	NM_001291920	6256	Hs.590886	NM_002957		RXRA	NR2B1	retinoid X receptor alpha	protein-coding
MACS_peak_5209	chr2	186051910	186052652	+	2567.59	NA	Intergenic	L1M1|LINE|L1	-551074	NM_173651	401024	Hs.98025	NM_173651	ENSG00000188738	FSIP2	-	fibrous sheath interacting protein 2	protein-coding
MACS_peak_9379	chr9	97545035	97545953	+	2563.87	NA	intron (NM_032823, intron 3 of 14)	intron (NM_032823, intron 3 of 14)	23563	NM_001193329	84909	Hs.434253	NM_032823	ENSG00000148120	C9orf3	AOPEP|AP-O|APO|C90RF3|ONPEP	chromosome 9 open reading frame 3	protein-coding
MACS_peak_2647	chr14	95522567	95523558	+	2562.01	NA	Intergenic	Intergenic	76778	NM_001195573	23405	Hs.87889	NM_030621	ENSG00000100697	DICER1	DCR1|Dicer|Dicer1e|HERNA|K12H4.8-LIKE|MNG1|RMSE2	dicer 1, ribonuclease type III	protein-coding
MACS_peak_878	chr10	29214223	29214883	+	2551.62	NA	Intergenic	Intergenic	79216	NM_001278522	283080		NM_001278522		C10orf126	bA492M23.1	chromosome 10 open reading frame 126	protein-coding
MACS_peak_5938	chr21	43796301	43796999	+	2543.40	NA	exon (NM_024022, exon 11 of 13)	exon (NM_024022, exon 11 of 13)	-10006	NM_003225	7031	Hs.162807	NM_003225	ENSG00000160182	TFF1	BCEI|D21S21|HP1.A|HPS2|pNR-2|pS2	trefoil factor 1	protein-coding
MACS_peak_7575	chr5	172962297	172963511	+	2538.85	NA	Intergenic	Intergenic	-43733	NR_027108	285593	Hs.409730	NR_027108	ENSG00000253955	LOC285593	-	uncharacterized LOC285593	ncRNA
MACS_peak_9234	chr9	33233869	33234563	+	2535.83	NA	Intergenic	Intergenic	-5980	NM_014471	27290	Hs.555934	NM_014471	ENSG00000122711	SPINK4	HEL136|PEC-60|PEC60	serine peptidase inhibitor, Kazal type 4	protein-coding
MACS_peak_7276	chr5	66531507	66532115	+	2533.37	NA	Intergenic	Intergenic	-39194	NM_005582	4064	Hs.87205	NM_005582		CD180	LY64|Ly78|RP105	CD180 molecule	protein-coding
MACS_peak_1559	chr11	72938590	72939697	+	2524.89	NA	5' UTR (NM_176072, exon 2 of 3)	5' UTR (NM_176072, exon 2 of 3)	9641	NM_176071	5029	Hs.339	NM_002564		P2RY2	HP2U|P2RU1|P2U|P2U1|P2UR|P2Y2|P2Y2R	purinergic receptor P2Y, G-protein coupled, 2	protein-coding
MACS_peak_917	chr10	32940377	32941091	+	2524.55	NA	intron (NM_024688, intron 3 of 22)	LTR19A|LTR|ERV1	84083	NM_024688	79741	Hs.585464	NM_024688	ENSG00000150076	CCDC7	BIOT2|BioT2-A|BioT2-B|BioT2-C|C10orf68	coiled-coil domain containing 7	protein-coding
MACS_peak_2303	chr13	82879763	82880297	+	2518.85	NA	Intergenic	Intergenic	-1078912	NR_047494	100861546	Hs.539621	NR_047494	ENSG00000260094	LINC00564	-	long intergenic non-protein coding RNA 564	ncRNA
MACS_peak_8569	chr7	116764500	116765142	+	2513.87	NA	intron (NM_021908, intron 3 of 15)	MIR|SINE|MIR	20825	NR_109981	93654	Hs.628891	NR_002331	ENSG00000226367	ST7-AS2	ST7AS2|ST7OT2	ST7 antisense RNA 2	ncRNA
MACS_peak_5303	chr2	218252062	218253435	+	2513.51	NA	intron (NR_026597, intron 8 of 12)	intron (NR_026597, intron 8 of 12)	105292	NR_133642	105373877		NR_133642		DIRC3-AS1	-	DIRC3 antisense RNA 1	ncRNA
MACS_peak_3121	chr16	376941	377655	+	2511.82	NA	intron (NM_003502, intron 2 of 10)	intron (NM_003502, intron 2 of 10)	25378	NM_003502	8312	Hs.592082	NM_003502	ENSG00000103126	AXIN1	AXIN|PPP1R49	axin 1	protein-coding
MACS_peak_5224	chr2	191650903	191652109	+	2509.69	NA	Intergenic	Intergenic	-94041	NM_001256310	2744	Hs.116448	NM_014905	ENSG00000115419	GLS	AAD20|GAC|GAM|GLS1|KGA	glutaminase	protein-coding
MACS_peak_7183	chr5	19734638	19735653	+	2496.77	NA	intron (NM_001291956, intron 6 of 14)	intron (NM_001291956, intron 6 of 14)	151236	NM_001291957	1016	Hs.317632	NM_004934	ENSG00000145526	CDH18	CDH14|CDH14L|CDH24	cadherin 18, type 2	protein-coding
MACS_peak_5699	chr20	51962532	51963476	+	2495.45	NA	intron (NM_173485, intron 2 of 2)	intron (NM_173485, intron 2 of 2)	161182	NM_001193421	128553	Hs.473117	NM_173485	ENSG00000182463	TSHZ2	C20orf17|OVC10-2|TSH2|ZABC2|ZNF218	teashirt zinc finger homeobox 2	protein-coding
MACS_peak_6911	chr4	40365274	40366147	+	2481.92	NA	Intergenic	Intergenic	28364	NM_017581	55584	Hs.272278	NM_017581	ENSG00000174343	CHRNA9	HSA243342|NACHRA9	cholinergic receptor, nicotinic alpha 9	protein-coding
MACS_peak_4097	chr17	80571687	80572481	+	2469.48	NA	TTS (NM_019613)	TTS (NM_019613)	34327	NM_019613	56270	Hs.132161	NM_019613	ENSG00000141580	WDR45B	WDR45L|WIPI-3|WIPI3	WD repeat domain 45B	protein-coding
MACS_peak_1170	chr10	117424177	117424736	+	2452.79	NA	intron (NM_207303, intron 26 of 28)	intron (NM_207303, intron 26 of 28)	571332	NM_001276282	26033	Hs.501127	NM_207303	ENSG00000107518	ATRNL1	ALP|bA338L11.1|bA454H24.1	attractin-like 1	protein-coding
MACS_peak_4762	chr2	38303049	38304118	+	2451.21	NA	promoter-TSS (NM_000104)	promoter-TSS (NM_000104)	-260	NM_000104	1545	Hs.154654	NM_000104	ENSG00000138061	CYP1B1	CP1B|CYPIB1|GLC3A|P4501B1	cytochrome P450, family 1, subfamily B, polypeptide 1	protein-coding
MACS_peak_3028	chr15	89658527	89659342	+	2441.55	NA	intron (NM_007011, intron 6 of 14)	intron (NM_007011, intron 6 of 14)	27553	NM_152924	11057	Hs.122337	NM_007011	ENSG00000140526	ABHD2	HS1-2|LABH2|PHPS1-2	abhydrolase domain containing 2	protein-coding
MACS_peak_8719	chr8	11588117	11588587	+	2429.64	NA	intron (NM_002052, intron 2 of 6)	MIRb|SINE|MIR	22987	NM_001308093	2626	Hs.243987	NM_002052	ENSG00000136574	GATA4	ASD2|TACHD|TOF|VSD1	GATA binding protein 4	protein-coding
MACS_peak_4751	chr2	28599852	28600788	+	2408.54	NA	Intergenic	Intergenic	-15459	NM_005253	2355	Hs.220971	NM_005253	ENSG00000075426	FOSL2	FRA2	FOS-like antigen 2	protein-coding
MACS_peak_4694	chr2	11670907	11671594	+	2392.18	NA	Intergenic	Intergenic	-2992	NM_014668	9687	Hs.467733	NM_014668	ENSG00000196208	GREB1	-	growth regulation by estrogen in breast cancer 1	protein-coding
MACS_peak_3999	chr17	70613412	70614648	+	2387.27	NA	intron (NR_033876, intron 3 of 4)	intron (NR_033876, intron 3 of 4)	22581	NR_033876	400619	Hs.447555	NR_033876	ENSG00000227036	LINC00511	LCAL5|onco-lncRNA-12	long intergenic non-protein coding RNA 511	ncRNA
MACS_peak_1629	chr11	86487103	86487858	+	2378.02	NA	Intergenic	Intergenic	-14621	NM_001293180	11098	Hs.25338	NM_007173	ENSG00000150687	PRSS23	SIG13|SPUVE|ZSIG13	protease, serine, 23	protein-coding
MACS_peak_7425	chr5	131714268	131714857	+	2369.49	NA	intron (NM_001308122, intron 3 of 10)	intron (NM_001308122, intron 3 of 10)	-8954	NR_110997	553103	Hs.570908	NR_110997	ENSG00000233006	LOC553103	-	uncharacterized LOC553103	ncRNA
MACS_peak_9329	chr9	90959293	90960048	+	2366.07	NA	Intergenic	MER39|LTR|ERV1	-43627	NM_006717	10927	Hs.146804	NM_006717	ENSG00000106723	SPIN1	SPIN	spindlin 1	protein-coding
MACS_peak_57	chr1	7019442	7020120	+	2362.68	NA	intron (NM_015215, intron 3 of 22)	MIRb|SINE|MIR	174397	NR_038934	23261	Hs.397705	NM_015215	ENSG00000171735	CAMTA1	CANPMR	calmodulin binding transcription activator 1	protein-coding
MACS_peak_9071	chr8	128882110	128883400	+	2354.61	NA	intron (NR_003367, intron 1 of 8)	intron (NR_003367, intron 1 of 8)	74547	NR_031609	100302185		NR_031609	ENSG00000275264	MIR1204	hsa-mir-1204	microRNA 1204	ncRNA
MACS_peak_371	chr1	108998655	108999934	+	2352.18	NA	intron (NM_001143988, intron 6 of 14)	intron (NM_001143988, intron 6 of 14)	6390	NM_001143987	653149	Hs.712226	NM_001143987	ENSG00000186086	NBPF6	-	neuroblastoma breakpoint family, member 6	protein-coding
MACS_peak_7890	chr6	53329581	53330254	+	2347.24	NA	Intergenic	L2a|LINE|L2	80010	NM_001197115	2729	Hs.654465	NM_001498	ENSG00000001084	GCLC	GCL|GCS|GLCL|GLCLC	glutamate-cysteine ligase, catalytic subunit	protein-coding
MACS_peak_9444	chr9	114774268	114774975	+	2344.82	NA	intron (NR_036085, intron 3 of 3)	intron (NR_036085, intron 3 of 3)	80241	NR_039814	100616114		NR_039814	ENSG00000266315	MIR4668	mir-4668	microRNA 4668	ncRNA
MACS_peak_1940	chr12	75265475	75266289	+	2325.65	NA	Intergenic	Intergenic	334331	NM_001136262	552889	Hs.744849	NM_001136262		ATXN7L3B	lnc-SCA7	ataxin 7-like 3B	protein-coding
MACS_peak_4202	chr18	43382485	43383129	+	2318.00	NA	Intergenic	Intergenic	-22738	NM_213602	284266	Hs.287692	NM_213602	ENSG00000197046	SIGLEC15	CD33L3|HsT1361|SIGLEC-15	sialic acid binding Ig-like lectin 15	protein-coding
MACS_peak_5406	chr2	237949851	237950413	+	2311.23	NA	Intergenic	MLT1C|LTR|ERVL-MaLR	-43952	NM_198189	10920	Hs.531713	NM_006710		COPS8	COP9|CSN8|SGN8	COP9 signalosome subunit 8	protein-coding
MACS_peak_7122	chr5	301678	303172	+	2302.27	NA	intron (NM_001267557, intron 2 of 3)	intron (NM_001267557, intron 2 of 3)	-1866	NM_020731	57491	Hs.50823	NM_020731	ENSG00000063438	AHRR	AHH|AHHR|bHLHe77	aryl-hydrocarbon receptor repressor	protein-coding
MACS_peak_7731	chr6	17393801	17394468	+	2282.88	NA	intron (NM_006366, intron 1 of 12)	G-rich|Low_complexity|Low_complexity	398	NM_006366	10486	Hs.132902	NM_006366	ENSG00000112186	CAP2	-	CAP, adenylate cyclase-associated protein, 2 (yeast)	protein-coding
MACS_peak_118	chr1	15556138	15556913	+	2282.66	NA	Intergenic	MER20|DNA|hAT-Charlie	-17243	NM_052929	114827	Hs.659997	NM_052929	ENSG00000142621	FHAD1	-	forkhead-associated (FHA) phosphopeptide binding domain 1	protein-coding
MACS_peak_4502	chr19	35808306	35808929	+	2280.54	NA	Intergenic	L2a|LINE|L2	-11452	NM_001278417	933	Hs.579691	NM_001771	ENSG00000012124	CD22	SIGLEC-2|SIGLEC2	CD22 molecule	protein-coding
MACS_peak_5920	chr21	43025484	43026282	+	2277.80	NA	Intergenic	Intergenic	-73579	NR_024367	54090	Hs.570442	NR_024367		LINC00111	C21orf21|NCRNA00111	long intergenic non-protein coding RNA 111	ncRNA
MACS_peak_6620	chr3	169341538	169342181	+	2275.79	NA	intron (NM_004991, intron 1 of 16)	intron (NM_004991, intron 1 of 16)	39704	NM_001205194	2122	Hs.744090	NM_004991	ENSG00000085276	MECOM	AML1-EVI-1|EVI1|MDS1|MDS1-EVI1|PRDM3	MDS1 and EVI1 complex locus	protein-coding
MACS_peak_370	chr1	108924125	108925485	+	2273.86	NA	Intergenic	Intergenic	-68099	NM_001143988	653149	Hs.712226	NM_001143987	ENSG00000186086	NBPF6	-	neuroblastoma breakpoint family, member 6	protein-coding
MACS_peak_9627	chr9	137271822	137272519	+	2258.27	NA	TTS (NR_039816)	TTS (NR_039816)	913	NR_039816	100616236		NR_039816	ENSG00000263897	MIR4669	-	microRNA 4669	ncRNA
MACS_peak_8111	chr6	151937091	151937772	+	2252.88	NA	intron (NM_025059, intron 10 of 10)	intron (NM_025059, intron 10 of 10)	-74200	NM_001122742	2099	Hs.208124	NM_000125	ENSG00000091831	ESR1	ER|ESR|ESRA|ESTRR|Era|NR3A1	estrogen receptor 1	protein-coding
MACS_peak_5746	chr20	58563004	58563646	+	2247.36	NA	intron (NM_177980, intron 8 of 17)	MIR|SINE|MIR	-8092	NM_021810	60437	Hs.729046	NM_021810	ENSG00000124215	CDH26	VR20	cadherin 26	protein-coding
MACS_peak_4569	chr19	46080392	46081856	+	2246.52	NA	intron (NM_025136, intron 1 of 1)	L1MC4|LINE|L1	6998	NM_001017989	80207	Hs.466945	NM_025136	ENSG00000125741	OPA3	MGA3	optic atrophy 3 (autosomal recessive, with chorea and spastic paraplegia)	protein-coding
MACS_peak_9232	chr9	33221244	33221667	+	2246.20	NA	Intergenic	Intergenic	-18741	NM_014471	27290	Hs.555934	NM_014471	ENSG00000122711	SPINK4	HEL136|PEC-60|PEC60	serine peptidase inhibitor, Kazal type 4	protein-coding
MACS_peak_8966	chr8	103612774	103613740	+	2244.38	NA	Intergenic	CpG	49409	NM_024410	4956	Hs.159274	NM_024410	ENSG00000155087	ODF1	CT133|HSPB10|ODF|ODF2|ODF27|ODFP|ODFPG|ODFPGA|ODFPGB|RT7|SODF	outer dense fiber of sperm tails 1	protein-coding
MACS_peak_6607	chr3	168588134	168589032	+	2235.08	NA	Intergenic	Intergenic	-31150	NR_109989	100507661	Hs.65918	NR_109989	ENSG00000242268	LOC100507661	-	uncharacterized LOC100507661	ncRNA
MACS_peak_6315	chr3	53179121	53179782	+	2224.87	NA	Intergenic	Intergenic	-14981	NM_052859	91869	Hs.631910	NM_052859	ENSG00000163933	RFT1	CDG1N	RFT1 homolog	protein-coding
MACS_peak_8862	chr8	69766362	69767200	+	2221.79	NA	Intergenic	Intergenic	249644	NR_039986	100505718	Hs.122386	NR_039986	ENSG00000253658	LINC01592	-	long intergenic non-protein coding RNA 1592	ncRNA
MACS_peak_419	chr1	117050782	117052213	+	2221.42	NA	Intergenic	MIRb|SINE|MIR	-30049	NR_125973	101929023	Hs.668091	NR_125972	ENSG00000233154	LOC101929023	-	uncharacterized LOC101929023	ncRNA
MACS_peak_1927	chr12	67877313	67878282	+	2219.86	NA	Intergenic	Intergenic	-36065	NR_103861	100507175	Hs.505986	NR_103861	ENSG00000203585	LOC100507175	-	uncharacterized LOC100507175	ncRNA
MACS_peak_8361	chr7	45582921	45583641	+	2218.25	NA	Intergenic	Intergenic	-30458	NM_001281768	107	Hs.192215	NM_021116	ENSG00000164742	ADCY1	AC1|DFNB44	adenylate cyclase 1 (brain)	protein-coding
MACS_peak_7573	chr5	172899513	172900329	+	2213.43	NA	Intergenic	Intergenic	-106716	NR_027108	285593	Hs.409730	NR_027108	ENSG00000253955	LOC285593	-	uncharacterized LOC285593	ncRNA
MACS_peak_2864	chr15	63124339	63125177	+	2207.25	NA	intron (NM_015059, intron 51 of 55)	intron (NM_015059, intron 51 of 55)	8602	NR_029709	406965		NR_029709	ENSG00000211137	MIR190A	MIR190|MIRN190|hsa-mir-190a|miR-190|mir-190a	microRNA 190a	ncRNA
MACS_peak_1863	chr12	52542309	52543215	+	2200.44	NA	Intergenic	MIR3|SINE|MIR	43022	NM_182507	144501	Hs.140978	NM_182507	ENSG00000167767	KRT80	KB20	keratin 80, type II	protein-coding
MACS_peak_8527	chr7	101647206	101647976	+	2192.14	NA	intron (NM_001202544, intron 2 of 21)	intron (NM_001202544, intron 2 of 21)	186709	NM_181552	1523	Hs.191482	NM_001913	ENSG00000257923	CUX1	CASP|CDP|CDP/Cut|CDP1|COY1|CUTL1|CUX|Clox|Cux/CDP|GOLIM6|Nbla10317|p100|p110|p200|p75	cut-like homeobox 1	protein-coding
MACS_peak_2074	chr12	116933051	116933508	+	2170.82	NA	Intergenic	MLT1F1|LTR|ERVL-MaLR	-37948	NR_027345	100287569	Hs.441601	NM_207436	ENSG00000196668	LINC00173	NCRNA00173	long intergenic non-protein coding RNA 173	ncRNA
MACS_peak_4695	chr2	11672261	11672999	+	2154.95	NA	Intergenic	Intergenic	-1612	NM_014668	9687	Hs.467733	NM_014668	ENSG00000196208	GREB1	-	growth regulation by estrogen in breast cancer 1	protein-coding
MACS_peak_228	chr1	31904458	31905143	+	2148.44	NA	intron (NM_001199039, intron 9 of 10)	intron (NM_001199039, intron 9 of 10)	18140	NM_018565	347735	Hs.270655	NM_018565	ENSG00000168528	SERINC2	FKSG84|PRO0899|TDE2|TDE2L	serine incorporator 2	protein-coding
MACS_peak_8444	chr7	80506014	80506775	+	2145.21	NA	intron (NM_006379, intron 2 of 17)	intron (NM_006379, intron 2 of 17)	42273	NM_006379	10512	Hs.269109	NM_006379	ENSG00000075223	SEMA3C	SEMAE|SemE	sema domain, immunoglobulin domain (Ig), short basic domain, secreted, (semaphorin) 3C	protein-coding
MACS_peak_3563	chr16	85554229	85555152	+	2135.32	NA	Intergenic	Intergenic	-90339	NM_001134473	23199	Hs.461647	NM_014615	ENSG00000131149	GSE1	KIAA0182	Gse1 coiled-coil protein	protein-coding
MACS_peak_1592	chr11	77867040	77867883	+	2121.28	NA	intron (NR_102281, intron 2 of 2)	intron (NR_102281, intron 2 of 2)	16622	NR_102280	100289388	Hs.628183	NM_203432	ENSG00000246174	KCTD21-AS1	-	KCTD21 antisense RNA 1	ncRNA
MACS_peak_2929	chr15	71396802	71397589	+	2111.10	NA	Intergenic	MER4D|LTR|ERV1	10644	NM_001102658	196993	Hs.646533	NM_001102658	ENSG00000225362	CT62	-	cancer/testis antigen 62	protein-coding
MACS_peak_4288	chr19	2576017	2576590	+	2109.46	NA	intron (NM_052847, intron 2 of 4)	intron (NM_052847, intron 2 of 4)	-54410	NR_107004	102465838		NR_107004	ENSG00000277904	MIR7850	hsa-mir-7850	microRNA 7850	ncRNA
MACS_peak_8030	chr6	125475682	125476542	+	2108.07	NA	intron (NM_001292026, intron 1 of 4)	intron (NM_001292026, intron 1 of 4)	692	NM_001003395	7164	Hs.591347	NM_003287	ENSG00000111907	TPD52L1	D53|hD53	tumor protein D52-like 1	protein-coding
MACS_peak_5425	chr2	241008854	241009847	+	2101.12	NA	Intergenic	L1ME1|LINE|L1	-23861	NM_173351	150681	Hs.626616	NM_173351	ENSG00000178586	OR6B3	OR6B3P|OR6B3Q	olfactory receptor, family 6, subfamily B, member 3	protein-coding
MACS_peak_5147	chr2	159579958	159581026	+	2088.85	NA	Intergenic	Intergenic	-71337	NM_001017920	92196	Hs.59761	NM_001017920	ENSG00000163331	DAPL1	-	death associated protein like 1	protein-coding
MACS_peak_1482	chr11	69069045	69070073	+	2087.54	NA	Intergenic	Intergenic	7954	NM_001300924	26579	Hs.523848	NM_138768	ENSG00000172927	MYEOV	OCIM	myeloma overexpressed	protein-coding
MACS_peak_4211	chr18	46517052	46517757	+	2081.12	NA	Intergenic	MIR3|SINE|MIR	-40323	NM_001190821	4092	Hs.465087	NM_005904	ENSG00000101665	SMAD7	CRCS3|MADH7|MADH8	SMAD family member 7	protein-coding
MACS_peak_504	chr1	164717378	164718257	+	2074.95	NA	intron (NM_002585, intron 2 of 8)	LTR90A|LTR|LTR	26061	NR_038072	100505795	Hs.661039	NR_038072	ENSG00000233693	LOC100505795	-	uncharacterized LOC100505795	ncRNA
MACS_peak_2331	chr13	99302375	99303018	+	2064.99	NA	Intergenic	Intergenic	-73291	NM_001286649	8428	Hs.508514	NM_003576	ENSG00000102572	STK24	HEL-S-95|MST3|MST3B|STE20|STK3	serine/threonine kinase 24	protein-coding
MACS_peak_6565	chr3	156530197	156530885	+	2064.20	NA	promoter-TSS (NR_003284)	promoter-TSS (NR_003284)	-731	NR_003284	647033	Hs.745109	NR_003284		PA2G4P4	PA2G4L1	proliferation-associated 2G4 pseudogene 4	pseudo
MACS_peak_324	chr1	65509889	65510579	+	2059.92	NA	Intergenic	Intergenic	13291	NR_037443	100500854		NR_037443	ENSG00000265996	MIR3671	-	microRNA 3671	ncRNA
MACS_peak_8879	chr8	86852478	86854045	+	2051.46	NA	Intergenic	Intergenic	-13090	NR_003594	100288527	Hs.535056	NR_003594		REXO1L2P	-	REX1, RNA exonuclease 1 homolog-like 2, pseudogene	pseudo
MACS_peak_4491	chr19	35490698	35491690	+	2040.77	NA	promoter-TSS (NM_001136199)	promoter-TSS (NM_001136199)	-52	NM_001136199	57655	Hs.515351	NM_020895	ENSG00000089351	GRAMD1A	KIAA1533	GRAM domain containing 1A	protein-coding
MACS_peak_4769	chr2	39407184	39408004	+	2037.04	NA	intron (NM_001009565, intron 7 of 7)	intron (NM_001009565, intron 7 of 7)	49079	NM_001009565	344387	Hs.403201	NM_001009565	ENSG00000205111	CDKL4	-	cyclin-dependent kinase-like 4	protein-coding
MACS_peak_2363	chr13	113567618	113568260	+	2036.01	NA	Intergenic	Intergenic	55013	NR_034002	100289410	Hs.667436	NR_034002		MCF2L-AS1	-	MCF2L antisense RNA 1	ncRNA
MACS_peak_2520	chr14	69036564	69037328	+	2032.60	NA	intron (NM_133509, intron 10 of 10)	intron (NM_133509, intron 10 of 10)	223685	NM_004926	677	Hs.85155	NM_004926	ENSG00000185650	ZFP36L1	BRF1|Berg36|ERF-1|ERF1|RNF162B|TIS11B|cMG1	ZFP36 ring finger protein-like 1	protein-coding
MACS_peak_9061	chr8	128680226	128681872	+	2032.39	NA	Intergenic	Intergenic	65164	NR_117101	100270680	Hs.333720	NR_117101	ENSG00000249375	CASC11	CARLo-7|LINC00990|TCONS_00014535	cancer susceptibility candidate 11 (non-protein coding)	ncRNA
MACS_peak_3728	chr17	15562589	15563561	+	2030.91	NA	intron (NM_006470, intron 3 of 8)	intron (NM_006470, intron 3 of 8)	23118	NM_006470	10626	Hs.123534	NM_006470	ENSG00000221926	TRIM16	EBBP	tripartite motif containing 16	protein-coding
MACS_peak_2002	chr12	97961407	97963056	+	2029.29	NA	Intergenic	L1M5|LINE|L1	4641	NR_029678	406926		NR_029678	ENSG00000207586	MIR135A2	MIRN135-2|MIRN135A2|mir-135a-2	microRNA 135a-2	ncRNA
MACS_peak_8799	chr8	37159499	37160032	+	2024.09	NA	intron (NR_031672, intron 2 of 2).2	MIR3|SINE|MIR	180294	NR_031672	100302233		NR_031672	ENSG00000221641	MIR1268A	MIR1268|MIRN1268|hsa-mir-1268|hsa-mir-1268a	microRNA 1268a	ncRNA
MACS_peak_8038	chr6	125905748	125906272	+	2015.23	NA	Intergenic	Intergenic	-89489	NR_038906	643623	Hs.520367	NR_038906	ENSG00000224506	LOC643623	-	uncharacterized LOC643623	ncRNA
MACS_peak_932	chr10	43521663	43522372	+	2014.15	NA	Intergenic	L2b|LINE|L2	29006	NR_049836	100847014		NR_049836	ENSG00000263795	MIR5100	-	microRNA 5100	ncRNA
MACS_peak_9556	chr9	132250408	132251826	+	2012.00	NA	non-coding (NR_038955, exon 1 of 5)	non-coding (NR_038955, exon 1 of 5)	178	NR_038955	100506190	Hs.529860	NR_038955		LINC00963	-	long intergenic non-protein coding RNA 963	ncRNA
MACS_peak_4031	chr17	73544810	73546474	+	1984.84	NA	intron (NM_001015002, intron 2 of 9)	intron (NM_001015002, intron 2 of 9)	23859	NM_001031803	3993	Hs.514477	NM_004524	ENSG00000073350	LLGL2	HGL|Hugl-2|LGL2	lethal giant larvae homolog 2 (Drosophila)	protein-coding
MACS_peak_8748	chr8	22596522	22597135	+	1980.87	NA	intron (NM_144962, intron 4 of 6)	intron (NM_144962, intron 4 of 6)	-46013	NM_004430	1960	Hs.534313	NM_004430	ENSG00000179388	EGR3	EGR-3|PILOT	early growth response 3	protein-coding
MACS_peak_6186	chr3	12412940	12413826	+	1974.52	NA	intron (NM_015869, intron 1 of 6)	intron (NM_015869, intron 1 of 6)	20382	NM_015869	5468	Hs.162646	NM_005037	ENSG00000132170	PPARG	CIMT1|GLM1|NR1C3|PPARG1|PPARG2|PPARgamma	peroxisome proliferator-activated receptor gamma	protein-coding
MACS_peak_5198	chr2	175525579	175526238	+	1971.72	NA	intron (NM_001077269, intron 1 of 7)	intron (NM_001077269, intron 1 of 7)	21719	NM_001077269	7456	Hs.128067	NM_003387	ENSG00000115935	WIPF1	PRPL-2|WAS2|WASPIP|WIP	WAS/WASL interacting protein family, member 1	protein-coding
MACS_peak_4275	chr19	1512970	1513769	+	1965.15	NA	promoter-TSS (NM_213604)	promoter-TSS (NM_213604)	-181	NM_213604	339366	Hs.371674	NM_213604	ENSG00000185761	ADAMTSL5	THSD6	ADAMTS like 5	protein-coding
MACS_peak_8449	chr7	80572094	80573137	+	1952.52	NA	Intergenic	Intergenic	-23948	NM_006379	10512	Hs.269109	NM_006379	ENSG00000075223	SEMA3C	SEMAE|SemE	sema domain, immunoglobulin domain (Ig), short basic domain, secreted, (semaphorin) 3C	protein-coding
MACS_peak_3494	chr16	81309220	81309856	+	1949.97	NA	intron (NM_017429, intron 7 of 10)	intron (NM_017429, intron 7 of 10)	37242	NM_017429	53630	Hs.212172	NM_017429	ENSG00000135697	BCO1	BCDO|BCDO1|BCMO|BCMO1|BCO	beta-carotene oxygenase 1	protein-coding
MACS_peak_7928	chr6	83279514	83280776	+	1942.28	NA	Intergenic	Intergenic	206184	NM_001166392	7162	Hs.82128	NM_006670	ENSG00000146242	TPBG	5T4|5T4AG|M6P1|WAIF1	trophoblast glycoprotein	protein-coding
MACS_peak_2560	chr14	75726456	75727324	+	1942.01	NA	Intergenic	Intergenic	-18591	NM_005252	2353	Hs.25647	NM_005252	ENSG00000170345	FOS	AP-1|C-FOS|p55	FBJ murine osteosarcoma viral oncogene homolog	protein-coding
MACS_peak_1438	chr11	66795070	66795893	+	1939.76	NA	intron (NM_177963, intron 1 of 7)	intron (NM_177963, intron 1 of 7)	4665	NM_177963	91683	Hs.287636	NM_177963	ENSG00000173227	SYT12	SYT11|sytXII	synaptotagmin XII	protein-coding
MACS_peak_938	chr10	43606068	43606733	+	1919.34	NA	intron (NM_020975, intron 6 of 19)	intron (NM_020975, intron 6 of 19)	-27493	NM_018590	55454	Hs.657569	NM_018590	ENSG00000169826	CSGALNACT2	CHGN2|GALNACT-2|GALNACT2|PRO0082	chondroitin sulfate N-acetylgalactosaminyltransferase 2	protein-coding
MACS_peak_1747	chr12	6472744	6473614	+	1918.07	NA	intron (NM_001038, intron 2 of 12)	CpG	11211	NM_001159576	6337	Hs.591047	NM_001038	ENSG00000111319	SCNN1A	BESC2|ENaCa|ENaCalpha|SCNEA|SCNN1	sodium channel, non voltage gated 1 alpha subunit	protein-coding
MACS_peak_3677	chr17	4436979	4438061	+	1916.77	NA	intron (NM_001124758, intron 9 of 12)	intron (NM_001124758, intron 9 of 12)	21161	NM_014520	10514	Hs.22824	NM_014520	ENSG00000132382	MYBBP1A	P160|PAP2	MYB binding protein (P160) 1a	protein-coding
MACS_peak_3613	chr16	88989818	88990707	+	1913.38	NA	intron (NM_005187, intron 1 of 11)	intron (NM_005187, intron 1 of 11)	-16185	NM_001290330	100129697	Hs.689377	NM_001290330		LOC100129697	-	uncharacterized LOC100129697	protein-coding
MACS_peak_5993	chr21	46806472	46807226	+	1912.46	NA	Intergenic	Intergenic	-18203	NM_130445	80781	Hs.517356	NM_030582	ENSG00000182871	COL18A1	KNO|KNO1|KS	collagen, type XVIII, alpha 1	protein-coding
MACS_peak_3441	chr16	72963139	72963894	+	1912.31	NA	intron (NM_001164766, intron 2 of 8)	intron (NM_001164766, intron 2 of 8)	118758	NM_006885	463	Hs.598297	NM_006885	ENSG00000140836	ZFHX3	ATBF1|ATBT|ZNF927	zinc finger homeobox 3	protein-coding
MACS_peak_778	chr10	5530018	5530805	+	1912.12	NA	Intergenic	Intergenic	11122	NM_017422	51806	Hs.180142	NM_017422	ENSG00000178372	CALML5	CLSP	calmodulin-like 5	protein-coding
MACS_peak_2230	chr13	30596951	30597965	+	1901.90	NA	Intergenic	Intergenic	85554	NR_046998	100874146	Hs.574116	NR_046998		LINC00365	-	long intergenic non-protein coding RNA 365	ncRNA
MACS_peak_9253	chr9	37953514	37954620	+	1895.85	NA	intron (NM_003028, intron 4 of 5)	intron (NM_003028, intron 4 of 5)	-49717	NR_024873	92014	Hs.634120	NM_033412	ENSG00000122696	SLC25A51	CG7943|MCART1	solute carrier family 25, member 51	protein-coding
MACS_peak_496	chr1	162129154	162129690	+	1895.70	NA	intron (NM_001164757, intron 2 of 9)	intron (NM_001164757, intron 2 of 9)	2525	NR_039798	100616386		NR_039798	ENSG00000266144	MIR4654	mir-4654	microRNA 4654	ncRNA
MACS_peak_1337	chr11	20053254	20053879	+	1891.22	NA	intron (NM_001111019, intron 2 of 27)	intron (NM_001111019, intron 2 of 27)	9464	NM_001111019	89797	Hs.64341	NM_145117	ENSG00000166833	NAV2	HELAD1|POMFIL2|RAINB1|STEERIN2|UNC53H2	neuron navigator 2	protein-coding
MACS_peak_1010	chr10	71199011	71199624	+	1890.45	NA	Intergenic	Intergenic	-11909	NM_012339	23555	Hs.499941	NM_012339	ENSG00000099282	TSPAN15	2700063A19Rik|NET-7|NET7|TM4SF15	tetraspanin 15	protein-coding
[truncated: 9,684 more rows]

## Sheet: WT_E2_1h
Peak ID	Chr	Start	End	Strand	Peak Score	Focus Ratio/Region Size	Annotation	Detailed Annotation	Distance to TSS	Nearest PromoterID	Entrez ID	Nearest Unigene	Nearest Refseq	Nearest Ensembl	Gene Name	Gene Alias	Gene Description	Gene Type
[truncated: 10,670 more rows]

[truncated: 6 more sheets: MIX_Ctr, MIX_E2_30min, MIX_E2_1h, HSF1_KO#2_Ctr, HSF1_KO#2_E2_30min, HSF1_KO#2_E2_1h]
