# Supplementary material for: Heat shock factor 1 (HSF1) cooperates with estrogen receptor α (ERα) in the regulation of estrogen action in breast cancer cells
Source: eLife. 2021 Nov 16;10:e69843. doi: 10.7554/eLife.69843 (PMC8709578; doi:10.7554/eLife.69843)
Supplement: Supplementary file 3. [file elife-69843-supp3.xlsx]

## Sheet: ERα&HSF1 Ctr vs input
Chr	HSF1_Ctr vs Input PeakID	HSF1_Ctr vs Input Start	HSF1_Ctr vs Input End	HSF1_Ctr vs Input tags	HSF1_Ctr vs Input fold_enrichment	HSF1_Ctr vs Input Peak Score	ERα_Ctr vs Input Peak ID	ERα_Ctr vs Input Start	ERα_Ctr vs Input End	ERα_Ctr vs Input length	ERα_Ctr vs Input summit	ERα_Ctr vs Input tags	ERα_Ctr vs Input fold_enrichment	ERα_Ctr vs Input Peak Score	Annotation	Detailed Annotation	HSF1_Ctr vs Input Distance to TSS	ERα_Ctr vs Input Distance to TSS	Nearest PromoterID	Entrez ID	Nearest Unigene	Nearest Refseq	Nearest Ensembl	Gene Name	Gene Alias	Gene Description	Gene Type
chr1	MACS_peak_4	912285	912447	17	16.54	75.33	MACS_peak_2	912090	912445	356	264	36	19.65	194.22	intron (NM_001291367, intron 3 of 4)	intron (NM_001291367, intron 3 of 4)	5131	5230	NM_001291366	84808	Hs.271462	NM_032722	ENSG00000187642	PERM1	C1orf170	PPARGC1 and ESRR induced regulator, muscle 1	protein-coding
chr1	MACS_peak_11	3418578	3418702	13	11.78	54.32	MACS_peak_10	3418481	3418747	267	164	13	14.22	54.8	intron (NM_001409, intron 17 of 36)	intron (NM_001409, intron 17 of 36)	47493	47467	NM_014448	27237	Hs.87435	NM_014448	ENSG00000130762	ARHGEF16	GEF16|NBR	Rho guanine nucleotide exchange factor 16	protein-coding
chr1	MACS_peak_30	16840242	16840945	78	14.79	143.65	MACS_peak_22	16840496	16840787	292	104	27	9.9	102.26	Intergenic	Intergenic	-21397	-21445	NR_023386	114819	Hs.597881	NR_023386	ENSG00000080947	CROCCP3	CROCCL2|dJ798A10.2	ciliary rootlet coiled-coil, rootletin pseudogene 3	pseudo
chr1	MACS_peak_36	17066891	17067182	33	12.21	108.79	MACS_peak_23	17066931	17067199	269	174	23	9.77	76.25	Intergenic	U1|snRNA|snRNA	-6080	-6109	NM_001282321	729574		NM_001282321	ENSG00000237847	FAM231A	FAM231C	family with sequence similarity 231, member A	protein-coding
chr1	MACS_peak_38	17222372	17223217	66	6.45	108.46	MACS_peak_24	17222408	17222784	377	176	28	8.99	82.19	Intergenic	Intergenic	-25651	-25849	NM_014675	9696	Hs.309403	NM_014675	ENSG00000058453	CROCC	ROLT	ciliary rootlet coiled-coil, rootletin	protein-coding
chr1	MACS_peak_38	17222372	17223217	66	6.45	108.46	MACS_peak_25	17222993	17223227	235	65	17	5.94	50.88	Intergenic	Intergenic	-25651	-25335	NM_014675	9696	Hs.309403	NM_014675	ENSG00000058453	CROCC	ROLT	ciliary rootlet coiled-coil, rootletin	protein-coding
chr1	MACS_peak_85	114354100	114355476	153	4.19	69.66	MACS_peak_51	114354180	114355190	1011	707	84	4.84	70.04	promoter-TSS (NR_125965)	promoter-TSS (NR_125965)	310	413	NR_130896	54665	Hs.486285	NM_018364	ENSG00000081019	RSBN1	ROSBIN	round spermatid basic protein 1	protein-coding
chr1	MACS_peak_122	147931080	147931491	33	8.96	69.84	MACS_peak_59	147931207	147931530	324	145	18	5.38	55.69	intron (NR_102404, intron 17 of 18).2	CpG	24134	24051	NM_001135789	653598	Hs.534674	NM_001135789		PPIAL4C	COAS-2	peptidylprolyl isomerase A (cyclophilin A)-like 4C	protein-coding
chr1	MACS_peak_124	148241438	148241883	34	7.11	56.47	MACS_peak_60	148241415	148241955	541	67	42	6.54	129.22	intron (NR_102404, intron 6 of 18).2	intron (NR_102404, intron 6 of 18).2	-39124	-39149	NM_001164261	645142	Hs.730589	NM_001164261		PPIAL4D	-	peptidylprolyl isomerase A (cyclophilin A)-like 4D	protein-coding
chr1	MACS_peak_195	205719378	205719769	31	7.55	69.43	MACS_peak_85	205719408	205719868	461	318	35	7.99	107.51	promoter-TSS (NM_022731)	promoter-TSS (NM_022731)	-201	-266	NM_022731	64710	Hs.213061	NM_022731	ENSG00000069275	NUCKS1	JC7|NUCKS	nuclear casein kinase and cyclin-dependent kinase substrate 1	protein-coding
chr11	MACS_peak_330	46638728	46639247	42	10.98	136.24	MACS_peak_174	46638667	46639210	299	164	14	10.07	333.96	promoter-TSS (NM_173811)	promoter-TSS (NM_173811)	161	112	NM_001142673	9776	Hs.127403	NM_014741	ENSG00000175224	ATG13	KIAA0652|PARATARG8	autophagy related 13	protein-coding
chr11	MACS_peak_334	47429816	47430282	39	14.7	122.31	MACS_peak_175	47429939	47430237	537	366	45	11.3	54.48	promoter-TSS (NM_001128225)	promoter-TSS (NM_001128225)	3	42	NM_001128225	91252	Hs.523664	NM_152264	ENSG00000165915	SLC39A13	-	solute carrier family 39 (zinc transporter), member 13	protein-coding
chr11	MACS_peak_350	62608834	62609391	81	12.4	83.75	MACS_peak_177	62608899	62609415	166	58	10	9.69	141.42	Intergenic	U2|snRNA|snRNA	-1484	-1529	NM_018093	54663	Hs.654620	NM_018093	ENSG00000133316	WDR74	-	WD repeat domain 74	protein-coding
chr11	MACS_peak_359	65189383	65190456	264	48.6	1489.49	MACS_peak_182	65190069	65190526	1254	741	99	8.72	124.59	promoter-TSS (NR_131012)	promoter-TSS (NR_131012)	-350	28	NR_028272	283131	Hs.523789	NR_002802		NEAT1	LINC00084|NCRNA00084|TncRNA|VINC	nuclear paraspeckle assembly transcript 1 (non-protein coding)	ncRNA
chr12	MACS_peak_413	73903	74526	73	14.7	164.9	MACS_peak_230	74160	74438	666	596	216	29.75	64.7	intron (NR_130745, intron 1 of 10)	CpG	489	574	NR_130745	100288778	Hs.459573	NR_130745	ENSG00000226210	LOC100288778	-	WAS protein family homolog 1 pseudogene	pseudo
chr12	MACS_peak_518	132195262	132195673	30	10.64	107.51	MACS_peak_312	132195273	132195690	394	114	39	15.65	220.57	promoter-TSS (NM_001261411)	promoter-TSS (NM_001261411)	-165	-151	NM_004592	6433	Hs.308171	NM_004592	ENSG00000061936	SFSWAP	SFRS8|SWAP	splicing factor, suppressor of white-apricot family	protein-coding
chr13	MACS_peak_538	37574763	37575093	22	14.36	71.37	MACS_peak_332	37574651	37574905	323	100	18	12.92	57.32	5' UTR (NM_181503, exon 1 of 11)	5' UTR (NM_181503, exon 1 of 11)	250	100	NM_181503	11340	Hs.294041	NM_181503	ENSG00000120699	EXOSC8	CIP3|EAP2|OIP2|PCH1C|RRP43|Rrp43p|bA421P11.3|p9	exosome component 8	protein-coding
chr14	MACS_peak_569	35016146	35016771	53	12.68	146.35	MACS_peak_341	35015880	35016541	429	283	28	11.57	191.15	Intergenic	Intergenic	-7515	-7267	NM_018453	55837	Hs.433269	NM_018453	ENSG00000129518	EAPP	BM036|C14orf11	E2F-associated phosphoprotein	protein-coding
chr14	MACS_peak_570	35024985	35025882	73	10.47	162.94	MACS_peak_342	35025155	35025583	181	115	9	12.92	131.22	Intergenic	U1|snRNA|snRNA	-16490	-16426	NM_018453	55837	Hs.433269	NM_018453	ENSG00000129518	EAPP	BM036|C14orf11	E2F-associated phosphoprotein	protein-coding
chr14	MACS_peak_581	58893852	58894468	54	11.44	129.36	MACS_peak_344	58893949	58894232	148	54	9	8.55	85.79	promoter-TSS (NM_001244190)	promoter-TSS (NM_001244190)	57	-13	NM_001244189	9786	Hs.232532	NM_014749	ENSG00000100578	KIAA0586	Talpid3	KIAA0586	protein-coding
chr15	MACS_peak_655	20305756	20307029	185	3.86	72.01	MACS_peak_396	20305750	20306620	219	62	14	14.54	64.6	Intergenic	(GCTG)n|Simple_repeat|Simple_repeat	-181605	-181812	NR_038836	646096	Hs.448789	NR_038836	ENSG00000259156	CHEK2P2	-	checkpoint kinase 2 pseudogene 2	pseudo
chr15	MACS_peak_658	21312777	21314224	214	5.25	86.98	MACS_peak_398	21312842	21314145	167	67	9	11.31	69.23	Intergenic	(GCTG)n|Simple_repeat|Simple_repeat	167733	167726	NR_040094	348120	Hs.116287	NR_040094	ENSG00000258710	LINC01193	CT60	long intergenic non-protein coding RNA 1193	ncRNA
chr15	MACS_peak_755	102501616	102502022	47	15.21	155.97	MACS_peak_453	102501652	102502076	247	108	17	16.15	84.86	non-coding (NR_003659, exon 1 of 11)	non-coding (NR_003659, exon 1 of 11)	803	848	NR_003659	374666	Hs.459573	NM_199163		WASH3P	FAM39DP	WAS protein family homolog 3 pseudogene	pseudo
chr16	MACS_peak_757	69748	69899	18	15.42	84.12	MACS_peak_454	69746	69992	223	117	11	12.92	104.93	Intergenic	(CCCTAA)n|Simple_repeat|Simple_repeat	-2704	-2750	NR_128720	103504738		NR_128720	ENSG00000278739	MIR6859-4	hsa-mir-6859-4	microRNA 6859-4	ncRNA
chr16	MACS_peak_803	27150203	27150671	38	6.27	52.07	MACS_peak_511	27150349	27150774	188	128	11	9.69	103.65	Intergenic	(TGG)n|Simple_repeat|Simple_repeat	-64370	-64246	NM_024773	79831	Hs.145717	NM_024773	ENSG00000155666	KDM8	JMJD5	lysine (K)-specific demethylase 8	protein-coding
chr16	MACS_peak_824	30968699	30969453	61	13.63	209.31	MACS_peak_522	30968711	30969413	272	109	14	7.9	315.69	5' UTR (NM_014712, exon 1 of 19)	5' UTR (NM_014712, exon 1 of 19)	461	447	NM_014712	9739	Hs.297483	NM_014712	ENSG00000099381	SETD1A	KMT2F|Set1|Set1A	SET domain containing 1A	protein-coding
chr17	MACS_peak_906	900158	900562	28	9.32	74.27	MACS_peak_596	900126	900485	225	93	10	9.69	256.6	promoter-TSS (NM_013337)	promoter-TSS (NM_013337)	3	-52	NM_013337	29928	Hs.745034	NM_013337		TIMM22	TEX4|TIM22	translocase of inner mitochondrial membrane 22 homolog (yeast)	protein-coding
chr17	MACS_peak_935	16283785	16284633	344	101.7	2963.13	MACS_peak_603	16284398	16284609	217	80	11	9.69	50.17	promoter-TSS (NM_001281720)	promoter-TSS (NM_001281720)	98	92	NM_001281720	7314	Hs.356190	NM_018955	ENSG00000170315	UBB	HEL-S-50	ubiquitin B	protein-coding
chr17	MACS_peak_943	18966821	18967333	42	14.49	139.8	MACS_peak_606	18967028	18967397	212	62	13	11.31	76.11	Intergenic	CpG	-16741	-16876	NM_006613	10750	Hs.567416	NM_006613		GRAP	-	GRB2-related adaptor protein	protein-coding
chr17	MACS_peak_945	19091290	19091606	28	16.72	99.76	MACS_peak_609	19091279	19091675	202	142	10	11.31	118.27	Intergenic	U3|snRNA|snRNA	-29263	-29292	NM_001291905	388436	Hs.677375	NM_001291905		LOC388436	-	uncharacterized protein ENSP00000382042	protein-coding
chr17	MACS_peak_970	45144619	45145212	38	10.35	94.7	MACS_peak_629	45144624	45145083	303	239	19	6.46	228.35	Intergenic	HERVIP10FH-int|LTR|ERV1	-24836	-24774	NM_001288811	51326	Hs.559259	NM_016632	ENSG00000185829	ARL17A	ARF1P2|ARL17P1	ADP-ribosylation factor like GTPase 17A	protein-coding
chr17	MACS_peak_1023	61919493	61920711	227	20.97	656.01	MACS_peak_637	61920002	61920551	601	241	42	8.68	53.02	5' UTR (NM_001098426, exon 1 of 13)	5' UTR (NM_001098426, exon 1 of 13)	249	75	NM_001098426	6603	Hs.250581	NM_003077	ENSG00000108604	SMARCD2	BAF60B|CRACD2|PRO2451|Rsc6p	SWI/SNF related, matrix associated, actin dependent regulator of chromatin, subfamily d, member 2	protein-coding
chr18	MACS_peak_1090	10004	10525	57	5.92	51.24	MACS_peak_669	9990	10723	324	153	21	9.41	1048.85	Intergenic	(CCCTAA)n|Simple_repeat|Simple_repeat	-1811	-1719	NR_110795	102723376	Hs.606852	NR_110795		LOC102723376	-	uncharacterized LOC102723376	ncRNA
chr2	MACS_peak_1249	87623698	87624111	91	9.46	143.83	MACS_peak_778	87623632	87624096	465	247	52	6.51	52.3	Intergenic	(CAGC)n|Simple_repeat|Simple_repeat	-131070	-131110	NR_024204	112597	Hs.652166	NM_052871	ENSG00000222041	LINC00152	C2orf59|NCRNA00152	long intergenic non-protein coding RNA 152	ncRNA
chr2	MACS_peak_1308	216847017	216847529	38	8.26	97.38	MACS_peak_823	216847326	216847525	200	64	11	7.26	50.84	intron (NM_018000, intron 2 of 4)	intron (NM_018000, intron 2 of 4)	31073	30921	NM_018000	55686	Hs.620391	NM_018000	ENSG00000118242	MREG	DSU|WDT2	melanoregulin	protein-coding
chr21	MACS_peak_1473	41696162	41696636	55	13.18	146.45	MACS_peak_945	41696430	41696756	327	200	23	7.13	54.47	intron (NR_073202, intron 8 of 32)	intron (NR_073202, intron 8 of 32)	-58611	-58417	NR_038898	100506492	Hs.667053	NR_038896	ENSG00000235123	DSCAM-AS1	M41	DSCAM antisense RNA 1	ncRNA
chr3	MACS_peak_1531	9773005	9773463	44	12.42	151.93	MACS_peak_987	9773110	9773567	458	115	43	12.23	168.06	promoter-TSS (NM_004634)	promoter-TSS (NM_004634)	-200	-96	NM_001003694	7862	Hs.1004	NM_004634	ENSG00000156983	BRPF1	BR140	bromodomain and PHD finger containing 1	protein-coding
chr3	MACS_peak_1539	14988518	14989024	38	8.53	102.03	MACS_peak_999	14988620	14988965	346	66	18	5.81	56.38	promoter-TSS (NM_003298)	promoter-TSS (NM_003298)	241	220	NR_046254	100505641	Hs.517821	NR_046251	ENSG00000225733	FGD5-AS1	-	FGD5 antisense RNA 1	ncRNA
chr4	MACS_peak_1653	49305599	49306172	66	6.47	55.09	MACS_peak_1104	49305544	49306077	534	371	39	7.76	79.97	Intergenic	ACRO1|Satellite|acro	317226	317151	NM_001286791	80157	Hs.479703	NM_025087	ENSG00000109182	CWH43	CWH43-C	cell wall biogenesis 43 C-terminal homolog	protein-coding
chr5	MACS_peak_1688	3276325	3276529	16	14.66	69.65	MACS_peak_1129	3276223	3276539	317	240	19	8.29	64.79	Intergenic	G-rich|Low_complexity|Low_complexity	98478	98432	NR_104617	102467074	Hs.575250	NR_104617	ENSG00000249808	LINC01377	-	long intergenic non-protein coding RNA 1377	ncRNA
chr7	MACS_peak_1861	1311718	1312398	60	7.13	93.5	MACS_peak_1264	1311695	1311929	235	175	22	7.97	70.16	Intergenic	Intergenic	39404	39158	NM_001080461	340260	Hs.232272	NM_001080461		UNCX	UNCX4.1	UNC homeobox	protein-coding
chr7	MACS_peak_1861	1311718	1312398	60	7.13	93.5	MACS_peak_1265	1311996	1312628	633	110	52	10.9	166.29	Intergenic	Intergenic	39404	39658	NM_001080461	340260	Hs.232272	NM_001080461		UNCX	UNCX4.1	UNC homeobox	protein-coding
chr7	MACS_peak_1882	30634232	30634619	33	17.28	128.94	MACS_peak_1281	30634183	30634626	444	235	32	13.41	142.71	promoter-TSS (NM_001316772)	promoter-TSS (NM_001316772)	74	53	NM_001316772	2617	Hs.404321	NM_002047	ENSG00000106105	GARS	CMT2D|DSMAV|GlyRS|HMN5|SMAD1	glycyl-tRNA synthetase	protein-coding
chr8	MACS_peak_2008	95652982	95653559	35	6.98	63.86	MACS_peak_1356	95653005	95653171	167	99	13	9.56	63.12	promoter-TSS (NM_001122825)	promoter-TSS (NM_001122825)	-94	-276	NM_017697	54845	Hs.487471	NM_017697	ENSG00000104413	ESRP1	RBM35A|RMB35A	epithelial splicing regulatory protein 1	protein-coding
chr8	MACS_peak_2008	95652982	95653559	35	6.98	63.86	MACS_peak_1357	95653184	95653582	399	174	26	6.63	81.58	promoter-TSS (NM_001122825)	promoter-TSS (NM_001122825)	-94	19	NM_001122826	54845	Hs.487471	NM_017697	ENSG00000104413	ESRP1	RBM35A|RMB35A	epithelial splicing regulatory protein 1	protein-coding
chr9	MACS_peak_2136	130784484	130785062	53	6.9	118.34	MACS_peak_1461	130784565	130784824	260	109	15	9.25	71.96	Intergenic	Intergenic	-41961	-41882	NM_001035254	399665	Hs.535972	NM_203305	ENSG00000167106	FAM102A	C9orf132|EEIG1|SYM-3A|bA203J24.7	family with sequence similarity 102, member A	protein-coding

## Sheet: ERα&HSF1 E2_1h vs Ctr
Chr	HSF1 E2_1h vs Ctr PeakID	HSF1 E2_1h vs Ctr Start	HSF1 E2_1h vs Ctr End	HSF1 E2_1h vs Ctr tags	HSF1 E2_1h vs Ctr fold enrichment	HSF1 E2_1h vs Ctr Peak Score	ERα E2_1h vs Ctr Peak ID	ERα E2_1h vs Ctr Start	ERα E2_1h vs Ctr End	ERα E2_1h vs Ctr summit	ERα E2_1h vs Ctr tags	ERα E2_1h vs Ctr fold enrichment	ERα E2_1h vs Ctr Peak Score	Annotation	Detailed Annotation	HSF1 E2_1h vs Ctr Distance to TSS	ERα E2_1h vs Ctr Distance to TSS	Nearest PromoterID	Entrez ID	Nearest Unigene	Nearest Refseq	Nearest Ensembl	Gene Name	Gene Alias	Gene Description	Gene Type	Expression fold change E2_4h/Ctr (RNA-Seq)
chr1	MACS_peak_5	7019591	7019900	25	9.41	93.37	MACS_peak_36	7019337	7020148	441	235	70.69	1693.39	intron (NM_015215, intron 3 of 22)	MIRb|SINE|MIR	174361	174358	NR_038934	23261	Hs.397705	NM_015215	ENSG00000171735	CAMTA1	CANPMR	calmodulin binding transcription activator 1	protein-coding	0.866494
chr1	MACS_peak_6	7507798	7508257	37	14.03	158.25	MACS_peak_42	7507635	7508337	414	329	49.33	2148.06	intron (NM_015215, intron 5 of 22)	MIRb|SINE|MIR	-323302	-323343	NM_004781	9341	Hs.66708	NM_004781	ENSG00000049245	VAMP3	CEB	vesicle associated membrane protein 3	protein-coding	0.878328
chr1	MACS_peak_8	16934586	16935384	145	5.24	156.23	MACS_peak_93	16934561	16935609	392	271	24.7	1072.19	5' UTR (NM_017940, exon 2 of 29)	5' UTR (NM_017940, exon 2 of 29)	5115	5015	NM_017940	55672	Hs.467587	NM_017940	ENSG00000219481	NBPF1	AB13|AB14|AB23|AD2|NBG|NBPF	neuroblastoma breakpoint family, member 1	protein-coding	1.91135
chr1	MACS_peak_13	44296385	44296741	26	7.93	88.72	MACS_peak_228	44296346	44297012	357	66	15.6	177.47	intron (NM_174963, intron 5 of 12)	MIRc|SINE|MIR	-7731	-7615	NR_106727	102464830		NR_106727		MIR6079	hsa-mir-6079	microRNA 6079	ncRNA	1
chr1	MACS_peak_17	108779907	108780340	36	5.71	71.53	MACS_peak_311	108779612	108780923	498	442	62.55	2922.61	intron (NM_001143989, intron 6 of 14)	intron (NM_001143989, intron 6 of 14)	6580	6436	NM_001143989	148545	Hs.511849	NM_152488	ENSG00000196427	NBPF4	-	neuroblastoma breakpoint family, member 4	protein-coding	1.45165
chr1	MACS_peak_18	112056040	112056474	41	5.39	79.68	MACS_peak_334	112055764	112056642	497	413	55.02	2693.24	intron (NM_001081976, intron 1 of 5)	intron (NM_001081976, intron 1 of 5)	-9514	-9460	NM_001302678	140	Hs.281342	NM_000677	ENSG00000121933	ADORA3	A3AR	adenosine A3 receptor	protein-coding	0.89527
chr1	MACS_peak_19	117811539	117812202	58	5.76	54.58	MACS_peak_361	117811295	117812093	405	75	10.01	159.67	Intergenic	Intergenic	-26218	-26394	NR_126408	104355292	Hs.576446	NR_126408	ENSG00000235202	LINC01525	lnc-MAN1A2-1	long intergenic non-protein coding RNA 1525	ncRNA	1
chr1	MACS_peak_24	145723142	145723875	209	4.26	68.69	MACS_peak_377	145723343	145724102	474	38	6.78	59.36	intron (NM_001302371, intron 68 of 89)	intron (NM_001302371, intron 68 of 89)	-4158	-3944	NM_001201325	5174	Hs.444751	NM_002614	ENSG00000174827	PDZK1	CAP70|CLAMP|NHERF-3|NHERF3|PDZD1	PDZ domain containing 1	protein-coding	0.859924
chr1	MACS_peak_37	177417887	177418301	29	8.39	110.01	MACS_peak_452	177417704	177418384	369	195	25.29	748.17	Intergenic	L2c|LINE|L2	97372	97322	NR_126001	102724661	Hs.146628	NR_126001		LOC102724661	-	uncharacterized LOC102724661	ncRNA	1
chr1	MACS_peak_39	180197746	180198282	65	6.8	138.57	MACS_peak_461	180197518	180198036	281	33	8.33	62.72	Intergenic	Intergenic	-1419	-1656	NM_033343	89884	Hs.658487	NM_033343		LHX4	CPHD4	LIM homeobox 4	protein-coding	1.97635
chr1	MACS_peak_42	201992167	201992830	49	4.23	54.51	MACS_peak_521	201992082	201992728	315	89	22.3	339.26	Intergenic	Intergenic	12808	12715	NM_001114309	1999	Hs.603657	NM_004433	ENSG00000163435	ELF3	EPR-1|ERT|ESE-1|ESX	E74-like factor 3 (ets domain transcription factor, epithelial-specific )	protein-coding	1.01395
chr1	MACS_peak_43	202077313	202077709	36	4.81	55.78	MACS_peak_525	202076272	202078274	1290	384	31.43	1203.28	Intergenic	Intergenic	-14518	-14756	NM_004767	9283	Hs.132049	NM_004767		GPR37L1	ET(B)R-LP-2|ETBR-LP-2	G protein-coupled receptor 37 like 1	protein-coding	2.11266
chr1	MACS_peak_44	202081783	202082359	53	7.31	103.66	MACS_peak_526	202081543	202082636	597	435	57.42	2572.6	Intergenic	Intergenic	-9958	-9940	NM_004767	9283	Hs.132049	NM_004767		GPR37L1	ET(B)R-LP-2|ETBR-LP-2	G protein-coupled receptor 37 like 1	protein-coding	2.11266
chr2	MACS_peak_287	11638701	11639064	32	9.01	113.14	MACS_peak_3865	11638431	11639201	428	417	26.93	1786.16	Intergenic	Intergenic	-32579	-32513	NM_001278277	1876	Hs.603093	NM_198256	ENSG00000169016	E2F6	E2F-6	E2F transcription factor 6	protein-coding	1.25197
chr2	MACS_peak_288	11679517	11680050	46	10.83	177.75	MACS_peak_3872	11679415	11680333	413	394	56.15	2495.08	promoter-TSS (NM_148903)	promoter-TSS (NM_148903)	-297	-206	NM_148903	9687	Hs.467733	NM_014668	ENSG00000196208	GREB1	-	growth regulation by estrogen in breast cancer 1	protein-coding	8.80182
chr2	MACS_peak_289	28582213	28582532	17	9.66	53.83	MACS_peak_3924	28581876	28582732	475	209	76.44	1521.38	Intergenic	Intergenic	-33407	-33475	NM_005253	2355	Hs.220971	NM_005253	ENSG00000075426	FOSL2	FRA2	FOS-like antigen 2	protein-coding	2.39277
chr2	MACS_peak_290	28584024	28584224	13	7.84	52.11	MACS_peak_3925	28583715	28584475	350	249	88.97	2091.71	Intergenic	Intergenic	-31655	-31684	NM_005253	2355	Hs.220971	NM_005253	ENSG00000075426	FOSL2	FRA2	FOS-like antigen 2	protein-coding	2.39277
chr2	MACS_peak_292	45979507	45980109	82	12.37	353.09	MACS_peak_3975	45979436	45980259	439	202	43.86	1083.98	intron (NM_005400, intron 1 of 14)	intron (NM_005400, intron 1 of 14)	100765	100804	NM_005400	5581	Hs.580351	NM_005400	ENSG00000171132	PRKCE	PKCE|nPKC-epsilon	protein kinase C, epsilon	protein-coding	1.66269
chr2	MACS_peak_293	46047637	46048059	48	7.99	137.79	MACS_peak_3977	46047693	46048246	278	47	17.28	155.59	intron (NM_005400, intron 1 of 14)	intron (NM_005400, intron 1 of 14)	168805	168926	NM_005400	5581	Hs.580351	NM_005400	ENSG00000171132	PRKCE	PKCE|nPKC-epsilon	protein kinase C, epsilon	protein-coding	1.66269
chr2	MACS_peak_296	70609020	70609422	28	7.02	79.25	MACS_peak_4037	70608920	70609488	220	51	19.55	283.01	Intergenic	Intergenic	-80001	-79984	NM_032822	84908	Hs.516077	NM_032822	ENSG00000035141	FAM136A	-	family with sequence similarity 136, member A	protein-coding	0.986593
chr2	MACS_peak_297	70843455	70843728	17	8.02	64.87	MACS_peak_4039	70843286	70843851	274	110	36.24	622.68	Intergenic	Intergenic	-62444	-62421	NM_001099691	7039	Hs.170009	NM_003236	ENSG00000163235	TGFA	TFGA	transforming growth factor alpha	protein-coding	3.4651
chr2	MACS_peak_302	109469574	109469980	30	9.5	86.77	MACS_peak_4129	109469451	109470299	303	74	18.89	301.98	intron (NR_130121, intron 12 of 13)	intron (NR_130121, intron 12 of 13)	66571	66669	NM_001303106	165055	Hs.731709	NM_144978	ENSG00000163006	CCDC138	-	coiled-coil domain containing 138	protein-coding	0.926605
chr2	MACS_peak_308	139193241	139193799	56	5.49	108.46	MACS_peak_4243	139193102	139193841	357	147	50.85	888.6	Intergenic	Intergenic	-65830	-65879	NM_001001664	339745	Hs.333297	NM_001001664	ENSG00000144228	SPOPL	BTBD33	speckle-type POZ protein-like	protein-coding	0.762295
chr2	MACS_peak_311	150279581	150279824	16	6.27	51.18	MACS_peak_4267	150278897	150280051	776	257	54.94	1344.92	intron (NM_194317, intron 1 of 4)	intron (NM_194317, intron 1 of 4)	92673	92445	NM_194317	130574	Hs.21929	NM_194317	ENSG00000187123	LYPD6	-	LY6/PLAUR domain containing 6	protein-coding	0.971665
chr2	MACS_peak_320	220264895	220265222	22	6.06	51.42	MACS_peak_4463	220264560	220265492	537	182	42.31	1055.45	Intergenic	L2a|LINE|L2	-12396	-12364	NM_012100	23549	Hs.258551	NM_012100	ENSG00000123992	DNPEP	ASPEP|DAP	aspartyl aminopeptidase	protein-coding	1.21738
chr2	MACS_peak_321	226481130	226481499	29	8.46	93.65	MACS_peak_4491	226480978	226481480	269	59	19.3	260.03	intron (NM_020864, intron 4 of 5)	intron (NM_020864, intron 4 of 5)	215712	215627	NM_020864	57624	Hs.224409	NM_020864	ENSG00000144460	NYAP2	KIAA1486	neuronal tyrosine-phosphorylated phosphoinositide-3-kinase adaptor 2	protein-coding	1.17034
chr2	MACS_peak_322	237949960	237950352	43	18.04	231.88	MACS_peak_4539	237949875	237950344	245	260	44.06	1830.16	Intergenic	MLT1C|LTR|ERVL-MaLR	-43928	-43975	NM_198189	10920	Hs.531713	NM_006710		COPS8	COP9|CSN8|SGN8	COP9 signalosome subunit 8	protein-coding	0.828614
chr2	MACS_peak_323	238418601	238418916	27	10.32	106.77	MACS_peak_4551	238418516	238419154	370	206	87.82	1719.21	promoter-TSS (NR_106869)	promoter-TSS (NR_106869)	-816	-739	NR_106869	102465486		NR_106869	ENSG00000277842	MIR6811	hsa-mir-6811	microRNA 6811	ncRNA	1
chr2	MACS_peak_324	241009242	241009551	20	12.02	77.75	MACS_peak_4559	241008830	241009863	625	229	65.79	1470.54	Intergenic	L1ME1|LINE|L1	-23907	-23857	NM_173351	150681	Hs.626616	NM_173351	ENSG00000178586	OR6B3	OR6B3P|OR6B3Q	olfactory receptor, family 6, subfamily B, member 3	protein-coding	1
chr3	MACS_peak_365	12486200	12486680	29	6	64.47	MACS_peak_5143	12486128	12487201	380	150	16.4	545.38	Intergenic	Intergenic	-39491	-39267	NM_001145393	80746	Hs.335550	NM_025265	ENSG00000154743	TSEN2	PCH2B|SEN2|SEN2L	TSEN2 tRNA splicing endonuclease subunit	protein-coding	1.38926
chr3	MACS_peak_367	15334333	15334844	37	5.71	59.57	MACS_peak_5170	15334127	15335096	373	167	40.94	858.57	intron (NM_001018009, intron 3 of 8)	intron (NM_001018009, intron 3 of 8)	38897	38920	NR_046084	100505696	Hs.745026	NR_046084	ENSG00000224660	SH3BP5-AS1	-	SH3BP5 antisense RNA 1	ncRNA	1.22091
chr3	MACS_peak_369	29981166	29981646	49	6.41	92.33	MACS_peak_5188	29981128	29981716	306	41	9.86	97.81	intron (NM_001177711, intron 11 of 13)	L2|LINE|L2	-5759	-5775	NR_046556	100873977	Hs.581453	NR_046556	ENSG00000235593	RBMS3-AS1	-	RBMS3 antisense RNA 1	ncRNA	1
chr3	MACS_peak_370	50302743	50303045	20	6	52.24	MACS_peak_5240	50302365	50303046	403	126	62.66	999.63	Intergenic	Intergenic	1909	2098	NR_110702	101928931	Hs.587216	NR_110702	ENSG00000232352	SEMA3B-AS1	-	SEMA3B antisense RNA 1 (head to head)	ncRNA	1.51378
chr3	MACS_peak_372	58452670	58453098	32	4.4	52.07	MACS_peak_5274	58452788	58453413	296	107	59.62	741.63	Intergenic	Intergenic	-24939	-24723	NM_001128214	200845	Hs.13982	NM_153331	ENSG00000168301	KCTD6	KCASH3	potassium channel tetramerization domain containing 6	protein-coding	1.16328
chr3	MACS_peak_375	107705393	107705710	21	9.98	75.71	MACS_peak_5353	107705357	107705959	263	190	73.31	1569.37	Intergenic	Intergenic	103499	103606	NR_015394	285205	Hs.134882	NR_015394	ENSG00000240423	LINC00636	-	long intergenic non-protein coding RNA 636	ncRNA	0.856942
chr3	MACS_peak_376	107718234	107718753	37	6.38	77.99	MACS_peak_5354	107717942	107718969	613	436	36.34	2305.14	Intergenic	LTR39|LTR|ERV1	91442	91480	NM_198793	961	Hs.446414	NM_001777	ENSG00000196776	CD47	IAP|MER6|OA3	CD47 molecule	protein-coding	0.813335
chr3	MACS_peak_381	127803312	127804106	103	4.88	94.95	MACS_peak_5398	127803039	127803816	396	148	40.76	847.37	intron (NM_003707, intron 9 of 10)	intron (NM_003707, intron 9 of 10)	9056	8774	NR_046645	100874089	Hs.581603	NR_046645	ENSG00000239608	RUVBL1-AS1	-	RUVBL1 antisense RNA 1	ncRNA	1
chr3	MACS_peak_383	149955921	149956442	42	5.13	50.92	MACS_peak_5450	149955928	149956563	408	119	27.29	656.82	promoter-TSS (NR_110167)	promoter-TSS (NR_110167)	-125	-61	NR_110168	101927992	Hs.534682	NR_110167	ENSG00000244541	LINC01213	-	long intergenic non-protein coding RNA 1213	ncRNA	1.24596
chr3	MACS_peak_384	150454943	150455487	51	9.45	187.32	MACS_peak_5459	150454808	150455590	386	389	43.75	2552.69	intron (NR_121657, intron 1 of 2)	intron (NR_121657, intron 1 of 2)	1557	1573	NR_121657	101928105		NR_121657		LOC101928105	-	uncharacterized LOC101928105	ncRNA	1
chr3	MACS_peak_387	160748856	160749270	32	6.15	68.8	MACS_peak_5489	160748679	160749435	369	190	51.66	1232.04	intron (NM_139245, intron 2 of 3)	intron (NM_139245, intron 2 of 3)	73620	73626	NM_033169	8706	Hs.418062	NM_003781	ENSG00000169255	B3GALNT1	B3GALT3|GLCT3|GLOB|Gb4Cer|P|P1|beta3Gal-T3|galT3	beta-1,3-N-acetylgalactosaminyltransferase 1 (globoside blood group)	protein-coding	1.22685
chr3	MACS_peak_389	161057370	161057850	53	5.66	111.4	MACS_peak_5498	161057213	161058416	434	559	34.52	2940.73	Intergenic	L1PA17|LINE|L1	32261	32057	NM_001040100	165679	Hs.369104	NM_145035		SPTSSB	ADMP|C3orf57|SSSPTB	serine palmitoyltransferase, small subunit B	protein-coding	0.549783
chr3	MACS_peak_390	168588642	168589014	25	6.84	66.66	MACS_peak_5517	168588144	168589019	612	329	62.17	2201.46	Intergenic	Intergenic	-30905	-31152	NR_109989	100507661	Hs.65918	NR_109989	ENSG00000242268	LOC100507661	-	uncharacterized LOC100507661	ncRNA	1
chr3	MACS_peak_395	188209428	188209682	16	6.67	52.05	MACS_peak_5595	188209184	188209860	285	215	78.27	1843.8	intron (NM_005578, intron 4 of 10)	intron (NM_005578, intron 4 of 10)	76899	76932	NR_046623	100873917	Hs.674993	NR_046623	ENSG00000224563	LPP-AS1	-	LPP antisense RNA 1	ncRNA	1
chr3	MACS_peak_396	189560398	189560789	28	6.67	68.79	MACS_peak_5604	189560330	189561266	298	297	54.58	2168.27	intron (NM_001114978, intron 4 of 12)	intron (NM_001114978, intron 4 of 12)	12882	13087	NR_030642	100126340		NR_030642	ENSG00000216058	MIR944	MIRN944|hsa-mir-944|mir-944	microRNA 944	ncRNA	1
chr3	MACS_peak_397	193588185	193588964	163	4.88	83.65	MACS_peak_5612	193588041	193589276	362	205	30.59	866.28	Intergenic	Intergenic	123453	123369	NR_027764	100128023	Hs.730112	NR_027764		DPPA2P3	-	developmental pluripotency associated 2 pseudogene 3	pseudo	1
chr3	MACS_peak_398	193876688	193877148	40	6.42	88.48	MACS_peak_5625	193876565	193877406	367	372	63.58	2593.4	Intergenic	Intergenic	22987	23054	NM_005524	3280	Hs.250666	NM_005524	ENSG00000114315	HES1	HES-1|HHL|HRY|bHLHb39	hes family bHLH transcription factor 1	protein-coding	0.715709
chr4	MACS_peak_400	20495509	20495914	37	6.32	77.64	MACS_peak_5718	20495445	20495798	239	16	11.73	58.72	intron (NM_001289136, intron 9 of 35)	L2c|LINE|L2	-34187	-34277	NR_029631	407000		NR_029631	ENSG00000207732	MIR218-1	MIRN218-1|mir-218-1	microRNA 218-1	ncRNA	1
chr4	MACS_peak_408	103326041	103326296	15	6.67	52.49	MACS_peak_5848	103325815	103326473	329	46	17.34	166.03	Intergenic	MLT2D|LTR|ERVL	-59513	-59489	NM_001135146	64116	Hs.288034	NM_022154	ENSG00000138821	SLC39A8	BIGM103|LZT-Hs6|PP3105|ZIP8	solute carrier family 39 (zinc transporter), member 8	protein-coding	0.794871
chr4	MACS_peak_410	179874637	179874843	13	10.02	51.77	MACS_peak_5957	179874540	179875045	207	25	8.88	69.98	Intergenic	(CCA)n|Simple_repeat|Simple_repeat	-1045650	-1045702	NR_108092	101928656	Hs.508131	NR_108092	ENSG00000251504	LINC01099	-	long intergenic non-protein coding RNA 1099	ncRNA	1
chr5	MACS_peak_413	19734719	19735390	43	8.57	142.4	MACS_peak_6001	19734672	19735648	645	335	38.2	1882.18	intron (NM_001291956, intron 6 of 14)	intron (NM_001291956, intron 6 of 14)	151327	151221	NM_001291957	1016	Hs.317632	NM_004934	ENSG00000145526	CDH18	CDH14|CDH14L|CDH24	cadherin 18, type 2	protein-coding	0.685871
chr5	MACS_peak_415	22762554	22762875	23	7.16	69.98	MACS_peak_6017	22762448	22763219	343	79	14.59	291.44	intron (NM_004061, intron 1 of 14)	MER110|LTR|ERV1	91017	90898	NM_004061	1010	Hs.113684	NM_004061	ENSG00000154162	CDH12	CDHB	cadherin 12, type 2 (N-cadherin 2)	protein-coding	0.593675
chr5	MACS_peak_425	105577134	105577633	48	6.67	87.77	MACS_peak_6194	105577033	105577825	422	405	20.52	1577.15	Intergenic	LTR40b|LTR|ERVL	769332	769286	NR_104671	102467213	Hs.570923	NR_104671	ENSG00000251027	LOC102467213	-	uncharacterized LOC102467213	ncRNA	1
chr5	MACS_peak_429	139088808	139089180	25	5	51.01	MACS_peak_6297	139088299	139089364	399	259	54.18	1699.99	Intergenic	CpG	36814	36977	NR_105052	101929696	Hs.147408	NR_105052	ENSG00000249131	LOC101929696	-	uncharacterized LOC101929696	ncRNA	1
chr5	MACS_peak_432	167743058	167743738	47	7.68	120.06	MACS_peak_6346	167743025	167743856	507	400	73.35	3109.24	intron (NM_015238, intron 1 of 22)	intron (NM_015238, intron 1 of 22)	24333	24375	NM_001161662	23286	Hs.484047	NM_015238	ENSG00000113645	WWC1	HBEBP3|HBEBP36|KIBRA|MEMRYQTL|PPP1R168	WW and C2 domain containing 1	protein-coding	3.30524
chr5	MACS_peak_434	172899616	172899958	22	6.32	58.3	MACS_peak_6362	172899548	172900366	278	327	55.14	2487.97	Intergenic	Intergenic	-106850	-106680	NR_027108	285593	Hs.409730	NR_027108	ENSG00000253955	LOC285593	-	uncharacterized LOC285593	ncRNA	1
chr5	MACS_peak_435	172962425	172963438	214	7.94	228.48	MACS_peak_6363	172962292	172963552	375	339	29.24	1117.04	Intergenic	Intergenic	-43706	-43715	NR_027108	285593	Hs.409730	NR_027108	ENSG00000253955	LOC285593	-	uncharacterized LOC285593	ncRNA	1
chr6	MACS_peak_440	1641612	1641883	23	7.72	81.46	MACS_peak_6398	1641348	1642131	356	312	83.44	2475.1	intron (NM_001253846, intron 9 of 10)	intron (NM_001253846, intron 9 of 10)	31066	31058	NM_001453	2296	Hs.348883	NM_001453	ENSG00000054598	FOXC1	ARA|FKHL7|FREAC-3|FREAC3|IGDA|IHG1|IRID1|RIEG3	forkhead box C1	protein-coding	4.47503
chr6	MACS_peak_441	10859092	10859337	14	7.01	50.47	MACS_peak_6437	10859110	10859567	270	80	48.53	612.13	Intergenic	Intergenic	-20426	-20550	NM_005906	4117	Hs.446125	NM_005906	ENSG00000111837	MAK	RP62|dJ417M14.2	male germ cell-associated kinase	protein-coding	1.07583
chr6	MACS_peak_442	15036918	15037534	115	6.04	140.29	MACS_peak_6460	15036786	15037622	301	370	60.96	3019.59	Intergenic	Intergenic	-208980	-209002	NM_004973	3720	Hs.269059	NM_004973	ENSG00000008083	JARID2	JMJ	jumonji, AT rich interactive domain 2	protein-coding	1.90172
chr6	MACS_peak_443	15222105	15222547	42	7.72	93.4	MACS_peak_6469	15221740	15222682	555	502	101.7	3100	Intergenic	Intergenic	-23880	-23995	NM_004973	3720	Hs.269059	NM_004973	ENSG00000008083	JARID2	JMJ	jumonji, AT rich interactive domain 2	protein-coding	1.90172
chr6	MACS_peak_444	17389490	17389969	41	6.4	71.88	MACS_peak_6482	17389293	17389964	414	169	42.17	1055.5	Intergenic	Intergenic	-4007	-4108	NM_006366	10486	Hs.132902	NM_006366	ENSG00000112186	CAP2	-	CAP, adenylate cyclase-associated protein, 2 (yeast)	protein-coding	0.888147
chr6	MACS_peak_445	17394011	17394743	74	4.89	54.73	MACS_peak_6483	17393792	17394523	406	294	92.57	2519.34	intron (NM_006366, intron 1 of 12)	G-rich|Low_complexity|Low_complexity	641	421	NM_006366	10486	Hs.132902	NM_006366	ENSG00000112186	CAP2	-	CAP, adenylate cyclase-associated protein, 2 (yeast)	protein-coding	0.888147
chr6	MACS_peak_451	33699527	33700133	52	5.28	64.82	MACS_peak_6543	33699638	33700518	608	48	12.43	138.38	intron (NM_054111, intron 2 of 5)	intron (NM_054111, intron 2 of 5)	14932	14684	NM_054111	117283	Hs.17253	NM_054111	ENSG00000161896	IP6K3	IHPK3|INSP6K3	inositol hexakisphosphate kinase 3	protein-coding	1.31636
chr6	MACS_peak_457	53329737	53330051	18	8.33	52.2	MACS_peak_6611	53329465	53330185	429	284	46.08	1797.06	Intergenic	L2a|LINE|L2	80033	80102	NM_001197115	2729	Hs.654465	NM_001498	ENSG00000001084	GCLC	GCL|GCS|GLCL|GLCLC	glutamate-cysteine ligase, catalytic subunit	protein-coding	0.922974
chr6	MACS_peak_460	106583011	106583696	98	7.32	129.58	MACS_peak_6689	106582459	106583536	735	350	133.33	3100	Intergenic	Intergenic	36616	36260	NM_182907	639	Hs.436023	NM_001198	ENSG00000057657	PRDM1	BLIMP1|PRDI-BF1	PR domain containing 1, with ZNF domain	protein-coding	1.14624
chr6	MACS_peak_462	107194017	107194379	32	4.85	59.21	MACS_peak_6691	107193833	107194464	325	33	9.5	100.01	intron (NR_033557, intron 1 of 6)	intron (NR_033557, intron 1 of 6)	-37802	-37852	NR_030314	693172		NR_030314	ENSG00000207577	MIR587	MIRN587|hsa-mir-587	microRNA 587	ncRNA	1
chr6	MACS_peak_464	125475933	125476286	29	4.72	61.17	MACS_peak_6749	125475739	125476529	377	238	46.99	1325.4	intron (NM_001292026, intron 1 of 4)	intron (NM_001292026, intron 1 of 4)	689	714	NM_001003395	7164	Hs.591347	NM_003287	ENSG00000111907	TPD52L1	D53|hD53	tumor protein D52-like 1	protein-coding	1.17719
chr6	MACS_peak_465	125523342	125523768	32	8.22	86.56	MACS_peak_6752	125523147	125523846	414	273	43.72	1518.38	intron (NM_001292026, intron 1 of 4)	intron (NM_001292026, intron 1 of 4)	48135	48076	NM_001003395	7164	Hs.591347	NM_003287	ENSG00000111907	TPD52L1	D53|hD53	tumor protein D52-like 1	protein-coding	1.17719
chr6	MACS_peak_466	138903786	138904054	20	7.17	64.62	MACS_peak_6789	138903439	138904328	424	327	61.08	2502.17	Intergenic	Intergenic	-10252	-10215	NM_020464	57224	Hs.652741	NM_020464	ENSG00000135540	NHSL1	C6orf63	NHS-like 1	protein-coding	3.5602
chr6	MACS_peak_470	151937255	151937824	58	4.96	87.62	MACS_peak_6825	151936920	151937896	596	328	34.49	1494.29	intron (NM_025059, intron 10 of 10)	intron (NM_025059, intron 10 of 10)	-74092	-74223	NM_001122742	2099	Hs.208124	NM_000125	ENSG00000091831	ESR1	ER|ESR|ESRA|ESTRR|Era|NR3A1	estrogen receptor 1	protein-coding	0.801187
chr7	MACS_peak_475	2728657	2729026	25	5.71	61.53	MACS_peak_6906	2728719	2729305	223	172	61.95	1293.99	intron (NM_001284355, intron 1 of 5)	intron (NM_001284355, intron 1 of 5)	1005	1176	NM_001284355	155185	Hs.42221	NM_133463	ENSG00000174945	AMZ1	-	archaelysin family metallopeptidase 1	protein-coding	5.30849
chr7	MACS_peak_481	47615538	47615940	33	6.72	59.05	MACS_peak_7035	47615460	47616585	557	149	29.24	873.47	intron (NM_022748, intron 1 of 30)	intron (NM_022748, intron 1 of 30)	6003	5720	NM_022748	64759	Hs.520814	NM_022748	ENSG00000136205	TNS3	TEM6|TENS1	tensin 3	protein-coding	0.958771
chr7	MACS_peak_490	80506214	80506576	26	7.02	76.69	MACS_peak_7090	80506037	80506800	321	272	47.87	1688.87	intron (NM_006379, intron 2 of 17)	intron (NM_006379, intron 2 of 17)	42272	42249	NM_006379	10512	Hs.269109	NM_006379	ENSG00000075223	SEMA3C	SEMAE|SemE	sema domain, immunoglobulin domain (Ig), short basic domain, secreted, (semaphorin) 3C	protein-coding	0.877241
chr7	MACS_peak_491	80572170	80572573	33	7.22	79.11	MACS_peak_7095	80572030	80573144	339	317	63.8	1952.39	Intergenic	Intergenic	-23704	-23920	NM_006379	10512	Hs.269109	NM_006379	ENSG00000075223	SEMA3C	SEMAE|SemE	sema domain, immunoglobulin domain (Ig), short basic domain, secreted, (semaphorin) 3C	protein-coding	0.877241
chr7	MACS_peak_501	151442365	151442561	14	7.88	54.68	MACS_peak_7266	151442215	151442767	283	28	13.74	88.72	intron (NM_001040633, intron 3 of 15)	intron (NM_001040633, intron 3 of 15)	-9063	-9091	NM_001304527	51422	Hs.647072	NM_016203	ENSG00000106617	PRKAG2	AAKG|AAKG2|CMH6|H91620p|WPWS	protein kinase, AMP-activated, gamma 2 non-catalytic subunit	protein-coding	1.03092
chr7	MACS_peak_503	157176892	157177572	115	6.32	105.25	MACS_peak_7295	157176849	157177367	234	33	22.4	138.2	intron (NM_058246, intron 6 of 9)	intron (NM_058246, intron 6 of 9)	47521	47397	NM_058246	10049	Hs.490745	NM_005494	ENSG00000105993	DNAJB6	DJ4|DnaJ|HHDJ1|HSJ-2|HSJ2|LGMD1D|LGMD1E|MRJ|MSJ-1	DnaJ (Hsp40) homolog, subfamily B, member 6	protein-coding	1.21818
chr8	MACS_peak_504	11588238	11588586	20	9.31	64.62	MACS_peak_7321	11588068	11588653	274	228	72.99	1897.04	intron (NM_002052, intron 2 of 6)	MIRb|SINE|MIR	23047	22995	NM_001308093	2626	Hs.243987	NM_002052	ENSG00000136574	GATA4	ASD2|TACHD|TOF|VSD1	GATA binding protein 4	protein-coding	1.71028
chr8	MACS_peak_508	36919787	36920112	21	9.02	81.15	MACS_peak_7388	36919555	36920317	367	192	41.57	1024.71	Intergenic	MIRc|SINE|MIR	-59522	-59535	NR_031672	100302233		NR_031672	ENSG00000221641	MIR1268A	MIR1268|MIRN1268|hsa-mir-1268|hsa-mir-1268a	microRNA 1268a	ncRNA	1
chr8	MACS_peak_509	49541123	49541356	14	7.9	52.18	MACS_peak_7422	49540958	49541654	370	65	34.21	368.17	intron (NR_105002, intron 2 of 3)	L1MC3|LINE|L1	8276	8343	NR_105004	101929217	Hs.547790	NR_105004	ENSG00000253455	LOC101929217	-	uncharacterized LOC101929217	ncRNA	1
chr8	MACS_peak_510	68293188	68293578	24	6.27	68.04	MACS_peak_7450	68292707	68293862	717	252	136.45	2140.87	Intergenic	Intergenic	-37471	-37372	NM_006421	10565	Hs.656902	NM_006421	ENSG00000066777	ARFGEF1	ARFGEP1|BIG1|P200	ADP-ribosylation factor guanine nucleotide-exchange factor 1 (brefeldin A-inhibited)	protein-coding	1.20283
chr8	MACS_peak_511	69766699	69766992	20	7.19	52.86	MACS_peak_7455	69766299	69767222	568	289	31.33	1274.04	Intergenic	Intergenic	249580	249665	NR_039986	100505718	Hs.122386	NR_039986	ENSG00000253658	LINC01592	-	long intergenic non-protein coding RNA 1592	ncRNA	1
chr8	MACS_peak_516	100916947	100917547	63	4.81	94.66	MACS_peak_7536	100917159	100918267	689	195	46.3	1019.77	Intergenic	Intergenic	-11005	-11471	NM_004374	1345	Hs.351875	NM_004374	ENSG00000164919	COX6C	-	cytochrome c oxidase subunit VIc	protein-coding	0.726823
chr8	MACS_peak_518	102478369	102479418	100	6.25	99.03	MACS_peak_7550	102478658	102479424	447	265	61.3	1762.54	Intergenic	Intergenic	-25775	-25627	NM_024915	79977	Hs.661088	NM_024915	ENSG00000083307	GRHL2	BOM|DFNA28|ECTDS|TFCP2L3	grainyhead-like transcription factor 2	protein-coding	1.43289
chr8	MACS_peak_520	102486293	102486998	75	3.96	65.22	MACS_peak_7551	102485942	102487151	472	115	12.22	227.61	Intergenic	Intergenic	-18023	-18122	NM_024915	79977	Hs.661088	NM_024915	ENSG00000083307	GRHL2	BOM|DFNA28|ECTDS|TFCP2L3	grainyhead-like transcription factor 2	protein-coding	1.43289
chr8	MACS_peak_521	103612952	103613566	62	3.77	52.43	MACS_peak_7560	103612646	103614011	676	343	27.31	954.16	Intergenic	CpG	49411	49480	NM_024410	4956	Hs.159274	NM_024410	ENSG00000155087	ODF1	CT133|HSPB10|ODF|ODF2|ODF27|ODFP|ODFPG|ODFPGA|ODFPGB|RT7|SODF	outer dense fiber of sperm tails 1	protein-coding	1
chr8	MACS_peak_524	116999943	117000715	184	6.01	95.76	MACS_peak_7601	117000001	117000679	318	81	18.03	323.02	intron (NR_046215, intron 7 of 13)	intron (NR_046215, intron 7 of 13)	-319074	-319085	NM_014112	7227	Hs.657018	NM_014112	ENSG00000104447	TRPS1	GC79|LGCR	trichorhinophalangeal syndrome I	protein-coding	0.67557
chr8	MACS_peak_525	122163149	122163519	29	5.6	63.58	MACS_peak_7618	122162817	122163754	538	279	40.6	1311.84	Intergenic	L2a|LINE|L2	-339025	-338976	NM_021021	6641	Hs.46701	NM_021021	ENSG00000172164	SNTB1	59-DAP|A1B|BSYN2|DAPA1B|SNT2|SNT2B1|TIP-43	syntrophin, beta 1 (dystrophin-associated protein A1, 59kDa, basic component 1)	protein-coding	1.06089
chr8	MACS_peak_528	128871740	128872734	98	4.53	81.13	MACS_peak_7641	128871435	128872692	573	551	44.69	3100	intron (NR_003367, intron 1 of 8)	MIRb|SINE|MIR	64029	63855	NR_031609	100302185		NR_031609	ENSG00000275264	MIR1204	hsa-mir-1204	microRNA 1204	ncRNA	1
chr8	MACS_peak_529	129153825	129155210	265	7.39	182.57	MACS_peak_7650	129153299	129155019	1027	452	18.4	510.56	Intergenic	Intergenic	-7845	-8203	NR_031613	100302281		NR_031613	ENSG00000221261	MIR1208	MIRN1208|hsa-mir-1208	microRNA 1208	ncRNA	1
chr9	MACS_peak_532	80278359	80278906	63	5.54	71.6	MACS_peak_7817	80278590	80279120	265	28	14.91	105.16	Intergenic	Intergenic	-15400	-15623	NM_004297	9630	Hs.657795	NM_004297	ENSG00000156049	GNA14	-	guanine nucleotide binding protein (G protein), alpha 14	protein-coding	1.50493
chr9	MACS_peak_535	94914173	94914993	59	5.52	90.38	MACS_peak_7887	94913981	94914923	398	152	28.95	698.11	intron (NR_027341, intron 1 of 3)	intron (NR_027341, intron 1 of 3)	10834	10703	NR_027341	158314	Hs.149940	NR_027341		LINC00475	C9orf44	long intergenic non-protein coding RNA 475	ncRNA	0.858832
chr9	MACS_peak_538	97545123	97545633	40	5.59	61.83	MACS_peak_7901	97545050	97545984	344	317	66.34	2529.51	intron (NM_032823, intron 3 of 14)	intron (NM_032823, intron 3 of 14)	23447	23586	NM_001193329	84909	Hs.434253	NM_032823	ENSG00000148120	C9orf3	AOPEP|AP-O|APO|C90RF3|ONPEP	chromosome 9 open reading frame 3	protein-coding	0.944657
chr9	MACS_peak_539	100834900	100835556	72	6.95	100.8	MACS_peak_7911	100834503	100835333	509	81	18.8	287.7	intron (NM_018946, intron 2 of 5)	AluSg7|SINE|Alu	16269	15959	NM_018946	54187	Hs.522310	NM_018946	ENSG00000095380	NANS	HEL-S-100|SAS	N-acetylneuraminic acid synthase	protein-coding	0.851027
chr9	MACS_peak_542	117320594	117320998	33	6.9	60.98	MACS_peak_7973	117319798	117321236	947	292	35.71	1215.47	Intergenic	MER92B|LTR|ERV1	-29198	-29477	NM_004888	9550	Hs.388654	NM_004888		ATP6V1G1	ATP6G|ATP6G1|ATP6GL|ATP6J|Vma10	ATPase, H+ transporting, lysosomal 13kDa, V1 subunit G1	protein-coding	0.851675
chr9	MACS_peak_546	130784376	130785112	150	8.19	243.95	MACS_peak_8023	130784246	130785045	460	349	55.14	2384.82	Intergenic	Intergenic	-41932	-41833	NM_001035254	399665	Hs.535972	NM_203305	ENSG00000167106	FAM102A	C9orf132|EEIG1|SYM-3A|bA203J24.7	family with sequence similarity 102, member A	protein-coding	4.64282
chr9	MACS_peak_547	130788954	130789572	61	7.18	163.78	MACS_peak_8025	130788784	130789799	533	518	81.14	3100	Intergenic	Intergenic	40336	40308	NM_197956	203245	Hs.373606	NM_197956	ENSG00000171169	NAIF1	C9orf90|bA379C10.2	nuclear apoptosis inducing factor 1	protein-coding	0.967555
chr9	MACS_peak_551	132220448	132220946	57	3.67	52.51	MACS_peak_8044	132220580	132221091	313	41	9.03	104.02	Intergenic	Intergenic	-30242	-30104	NR_038955	100506190	Hs.529860	NR_038955		LINC00963	-	long intergenic non-protein coding RNA 963	ncRNA	1.38189
chr9	MACS_peak_553	137787555	137787882	27	6.67	78.69	MACS_peak_8094	137787380	137788057	351	84	39.94	458.07	Intergenic	MLT1J2|LTR|ERVL-MaLR	15060	15060	NM_004108	2220	Hs.54517	NM_004108	ENSG00000160339	FCN2	EBP-37|FCNL|P35|ficolin-2	ficolin (collagen/fibrinogen domain containing lectin) 2	protein-coding	1
chr9	MACS_peak_554	138285592	138285856	19	8.12	55.87	MACS_peak_8100	138285331	138286189	684	48	8.69	109.1	Intergenic	Intergenic	50629	50665	NM_173520	157927	Hs.559511	NM_173520		C9orf62	-	chromosome 9 open reading frame 62	protein-coding	1
chr9	MACS_peak_558	140408425	140408845	36	4.41	57.7	MACS_peak_8122	140408212	140409442	383	419	36.42	2242.07	intron (NM_152286, intron 11 of 33)	intron (NM_152286, intron 11 of 33)	36386	36194	NM_152286	375775	Hs.294147	NM_152286	ENSG00000130653	PNPLA7	C9orf111|NTE-R1|NTEL1	patatin-like phospholipase domain containing 7	protein-coding	1.40778
chr10	MACS_peak_51	5702003	5702541	36	6.96	69.52	MACS_peak_687	5701733	5702798	574	125	6.27	2675.15	intron (NR_024581, intron 1 of 4)	intron (NR_024581, intron 1 of 4)	6286	6293	NR_037164	79754	Hs.445899	NM_024701	ENSG00000196372	ASB13	-	ankyrin repeat and SOCS box containing 13	protein-coding	2.23044
chr10	MACS_peak_52	6339536	6340396	179	6.06	141.4	MACS_peak_696	6338496	6340523	206	29	15.69	1653.15	Intergenic	Intergenic	-28541	-28998	NR_040079	399715		NR_040079	ENSG00000215244	LOC399715	-	uncharacterized LOC399715	ncRNA	1
chr10	MACS_peak_53	9080214	9080627	40	6.67	96.95	MACS_peak_718	9080058	9080824	389	570	25.77	358.89	Intergenic	Intergenic	140468	140489	NR_131944	105755953	Hs.564146	NR_131944		LOC105755953	-	uncharacterized LOC105755953	ncRNA	1
chr10	MACS_peak_54	9229976	9230823	65	5.03	89.92	MACS_peak_721	9228478	9231197	194	20	11.7	2165.37	Intergenic	Intergenic	-87177	-87739	NR_108039	100507163	Hs.649223	NR_108039		LINC00709	-	long intergenic non-protein coding RNA 709	ncRNA	1
chr10	MACS_peak_57	22922112	22922477	24	8.33	77.99	MACS_peak_743	22921835	22922752	153	35	9.93	401.53	intron (NM_005028, intron 1 of 9)	intron (NM_005028, intron 1 of 9)	81209	81210	NM_005028	5305	Hs.57079	NM_005028	ENSG00000150867	PIP4K2A	PI5P4KA|PIP5K2A|PIP5KII-alpha|PIP5KIIA|PIPK	phosphatidylinositol-5-phosphate 4-kinase, type II, alpha	protein-coding	1.40325
chr10	MACS_peak_58	28545796	28546220	38	7.93	103.5	MACS_peak_757	28545791	28546237	444	290	104.64	113.74	intron (NM_173496, intron 2 of 18)	intron (NM_173496, intron 2 of 18)	25059	25053	NM_173496	143098	Hs.499159	NM_173496	ENSG00000150054	MPP7	-	membrane protein, palmitoylated 7	protein-coding	0.755748
chr10	MACS_peak_60	29413549	29414387	154	4.52	71.95	MACS_peak_769	29413699	29414509	194	21	8.77	3100	Intergenic	Intergenic	-164022	-163886	NM_032517	84569	Hs.558572	NM_032517	ENSG00000120563	LYZL1	KAAG648|LYC2|PRO1278|bA534G20.1	lysozyme-like 1	protein-coding	0.760766
chr10	MACS_peak_61	30101225	30101517	21	10.74	87.16	MACS_peak_778	30101073	30101774	345	50	24.26	1158.61	Intergenic	Intergenic	-76641	-76693	NM_003174	6840	Hs.499209	NM_003174	ENSG00000197321	SVIL	-	supervillin	protein-coding	2.62712
chr10	MACS_peak_62	30811573	30811977	28	6.17	87.43	MACS_peak_783	30811580	30812132	161	23	15.59	278.64	Intergenic	MER11B|LTR|ERVK	88825	88906	NM_005204	1326	Hs.432453	NM_005204	ENSG00000107968	MAP3K8	AURA2|COT|EST|ESTF|MEKK8|TPL2|Tpl-2|c-COT	mitogen-activated protein kinase kinase kinase 8	protein-coding	1.15452
chr10	MACS_peak_64	89464882	89465488	56	4.91	53.76	MACS_peak_966	89465081	89465839	297	42	22.92	274.78	intron (NM_001015880, intron 1 of 12)	L1ME2z|LINE|L1	45709	45984	NM_001015880	9060	Hs.524491	NM_004670	ENSG00000198682	PAPSS2	ATPSK2|BCYM4|SK2	3'-phosphoadenosine 5'-phosphosulfate synthase 2	protein-coding	1.19595
chr10	MACS_peak_66	95194859	95195213	25	9.32	96.63	MACS_peak_976	95194610	95195458	391	93	41.11	1804.93	intron (NM_133337, intron 3 of 52)	MIR3|SINE|MIR	47038	47040	NM_133337	26509	Hs.602086	NM_013451	ENSG00000138119	MYOF	FER1L3	myoferlin	protein-coding	1.47892
chr10	MACS_peak_69	105691094	105691730	118	5.2	71.97	MACS_peak_1004	105690994	105691841	218	19	9.57	753.55	Intergenic	LTR16A|LTR|ERVL	-13367	-13372	NM_024928	79991	Hs.62314	NM_024928		OBFC1	AAF-44|AAF44|RPA-32|STN1|bA541N10.2	oligonucleotide/oligosaccharide-binding fold containing 1	protein-coding	1
chr10	MACS_peak_71	126812350	126813028	122	7.48	186.47	MACS_peak_1061	126812207	126812810	160	25	17.6	170.67	intron (NM_001083914, intron 1 of 10)	intron (NM_001083914, intron 1 of 10)	34695	34876	NM_001290215	1488	Hs.501345	NM_001329		CTBP2	-	C-terminal binding protein 2	protein-coding	1.02276
chr11	MACS_peak_72	1817675	1818116	31	6.48	70.98	MACS_peak_1114	1817443	1818340	290	81	49.85	2929.93	Intergenic	Intergenic	-32673	-32669	NM_001909	1509	Hs.654447	NM_001909	ENSG00000117984	CTSD	CLN10|CPSD|HEL-S-130P	cathepsin D	protein-coding	1.69366
chr11	MACS_peak_89	72938762	72939480	58	4.58	87.62	MACS_peak_1349	72938600	72939744	384	177	39.47	2337.6	5' UTR (NM_176072, exon 2 of 3)	5' UTR (NM_176072, exon 2 of 3)	9619	9670	NM_176071	5029	Hs.339	NM_002564		P2RY2	HP2U|P2RU1|P2U|P2U1|P2UR|P2Y2|P2Y2R	purinergic receptor P2Y, G-protein coupled, 2	protein-coding	2.43733
chr11	MACS_peak_74	19290508	19290753	15	7.62	54.53	MACS_peak_1171	19290401	19290960	212	50	23.37	649.16	Intergenic	Intergenic	-27428	-27478	NM_001256372	79733	Hs.523526	NM_024680	ENSG00000129173	E2F8	E2F-8	E2F transcription factor 8	protein-coding	1.31102
chr11	MACS_peak_84	66795108	66795667	45	5.42	68.44	MACS_peak_1271	66794918	66795842	343	127	28.3	1680.46	intron (NM_177963, intron 1 of 7)	intron (NM_177963, intron 1 of 7)	4571	4564	NM_177963	91683	Hs.287636	NM_177963	ENSG00000173227	SYT12	SYT11|sytXII	synaptotagmin XII	protein-coding	2.27475
chr11	MACS_peak_85	69329977	69330513	48	6.36	80.31	MACS_peak_1309	69329803	69330781	309	47	19.69	1314.19	Intergenic	Intergenic	29916	29963	NR_120545	101928292	Hs.736219	NR_120542		LINC01488	BRCAT8	long intergenic non-protein coding RNA 1488	ncRNA	1
chr11	MACS_peak_86	69706271	69706745	42	8.1	148.5	MACS_peak_1322	69705996	69707251	334	110	4.56	2269.39	Intergenic	Intergenic	-72316	-72431	NM_005247	2248	Hs.37092	NM_005247		FGF3	HBGF-3|INT2	fibroblast growth factor 3	protein-coding	1
chr11	MACS_peak_88	71192160	71193048	93	6.97	153.34	MACS_peak_1335	71191575	71192978	315	66	18.58	1821.45	intron (NM_018161, intron 11 of 20)	MIR|SINE|MIR	8055	7727	NR_106812	102466728		NR_106812	ENSG00000278349	MIR6754	hsa-mir-6754	microRNA 6754	ncRNA	1
chr11	MACS_peak_92	78770778	78771726	75	4.47	83.55	MACS_peak_1378	78770626	78771784	316	47	21.53	3100	intron (NM_001098816, intron 6 of 33)	intron (NM_001098816, intron 6 of 33)	341901	341948	NR_030598	100126333		NR_030598	ENSG00000211997	MIR708	MIRN708|hsa-mir-708	microRNA 708	ncRNA	1
chr11	MACS_peak_93	86487039	86487638	62	6.67	148.03	MACS_peak_1411	86487039	86487907	559	51	21.51	2201.52	Intergenic	Intergenic	-14763	-14628	NM_001293180	11098	Hs.25338	NM_007173	ENSG00000150687	PRSS23	SIG13|SPUVE|ZSIG13	protease, serine, 23	protein-coding	2.06762
chr11	MACS_peak_95	117928406	117929108	59	5.08	85.18	MACS_peak_1464	117927870	117929121	329	27	7.95	1749.49	intron (NR_038318, intron 2 of 3)	intron (NR_038318, intron 2 of 3)	-18970	-19232	NM_019894	56649	Hs.161985	NM_019894	ENSG00000137648	TMPRSS4	CAPH2|MT-SP2|TMPRSS3	transmembrane protease, serine 4	protein-coding	0.922779
chr12	MACS_peak_101	39837066	39837726	114	4.6	62.61	MACS_peak_1577	39836877	39837495	388	39	11.35	924.31	promoter-TSS (NM_001173463)	promoter-TSS (NM_001173463)	-204	6	NM_001173463	55605	Hs.374201	NM_017641	ENSG00000139116	KIF21A	CFEOM1|FEOM1|FEOM3A	kinesin family member 21A	protein-coding	1.80074
chr12	MACS_peak_111	64474831	64475449	90	12.19	260.1	MACS_peak_1664	64474957	64475535	255	54	26.16	287.01	intron (NM_020762, intron 10 of 21)	intron (NM_020762, intron 10 of 21)	140936	140830	NM_001300940	144577	Hs.444671	NM_152440	ENSG00000174206	C12orf66	-	chromosome 12 open reading frame 66	protein-coding	1.22441
chr12	MACS_peak_114	75265521	75266000	34	8	104.96	MACS_peak_1687	75264911	75266202	228	34	16.49	888.92	Intergenic	Intergenic	334209	334005	NM_001136262	552889	Hs.744849	NM_001136262		ATXN7L3B	lnc-SCA7	ataxin 7-like 3B	protein-coding	0.851431
chr12	MACS_peak_115	76100009	76100467	36	4.08	51.37	MACS_peak_1693	76099696	76100702	204	22	6.69	1781.08	Intergenic	Intergenic	-194820	-194781	NM_007043	11103	Hs.645517	NM_007043		KRR1	HRB2|RIP-1	KRR1, small subunit (SSU) processome component, homolog (yeast)	protein-coding	0.790215
chr12	MACS_peak_119	97962439	97963022	61	5.52	93.16	MACS_peak_1736	97961316	97962911	275	22	13	2659.85	Intergenic	L1M5|LINE|L1	5140	4523	NR_029678	406926		NR_029678	ENSG00000207586	MIR135A2	MIRN135-2|MIRN135A2|mir-135a-2	microRNA 135a-2	ncRNA	1
chr12	MACS_peak_121	105071458	105071841	27	4.64	61.67	MACS_peak_1760	105071508	105071946	324	31	7.31	103.51	intron (NM_001173982, intron 2 of 2)	L2a|LINE|L2	86238	86316	NR_037487	100500843		NR_037487	ENSG00000264295	MIR3922	-	microRNA 3922	ncRNA	1
chr12	MACS_peak_127	122186865	122187091	16	9.78	61.9	MACS_peak_1815	122186409	122187349	281	37	18.68	2059.91	intron (NM_001080825, intron 3 of 11)	intron (NM_001080825, intron 3 of 11)	36320	36221	NM_001080825	144404	Hs.644504	NM_001080825	ENSG00000188735	TMEM120B	-	transmembrane protein 120B	protein-coding	5.08652
chr12	MACS_peak_129	124877607	124878144	59	9.28	142.42	MACS_peak_1835	124877400	124878086	272	23	7.02	376.86	intron (NM_001077261, intron 18 of 47)	intron (NM_001077261, intron 18 of 47)	-56087	-55955	NR_106940	102466204		NR_106940	ENSG00000275967	MIR6880	hsa-mir-6880	microRNA 6880	ncRNA	1
chr12	MACS_peak_132	132345166	132345667	36	4.91	51.37	MACS_peak_1865	132345097	132345903	289	38	11.84	2077.75	Intergenic	Intergenic	32475	32559	NM_016155	4326	Hs.709245	NM_016155	ENSG00000198598	MMP17	MT4-MMP	matrix metallopeptidase 17 (membrane-inserted)	protein-coding	2.03633
chr13	MACS_peak_134	46694283	46694596	23	6.35	62.99	MACS_peak_1942	46694191	46695012	280	35	9.69	289.83	Intergenic	Intergenic	-15228	-15390	NM_001278541	1361	Hs.512937	NM_001872	ENSG00000080618	CPB2	CPU|PCPB|TAFI	carboxypeptidase B2 (plasma)	protein-coding	1
chr14	MACS_peak_139	50459550	50459877	20	6.9	56.01	MACS_peak_2119	50459191	50460256	278	154	70.97	2499.02	non-coding (NR_126499, exon 1 of 4)	non-coding (NR_126499, exon 1 of 4)	139	129	NR_126499	283551	Hs.292580	NM_001012706	ENSG00000214900	LINC01588	C14orf182	long intergenic non-protein coding RNA 1588	ncRNA	1.74744
chr14	MACS_peak_142	65433815	65434159	25	5.64	50.87	MACS_peak_2168	65433475	65434239	131	17	10.18	140.13	intron (NM_001308154, intron 1 of 6)	intron (NM_001308154, intron 1 of 6)	4888	5018	NM_001308154	376267	Hs.512492	NM_198686	ENSG00000139998	RAB15	-	RAB15, member RAS oncogene family	protein-coding	1.03496
chr14	MACS_peak_143	65585038	65585428	26	7.02	70.5	MACS_peak_2169	65584637	65585632	305	48	19.74	2464.9	Intergenic	Intergenic	-15820	-15721	NR_073137	4149	Hs.285354	NM_002382	ENSG00000125952	MAX	bHLHd4	MYC associated factor X	protein-coding	1.81672
chr14	MACS_peak_146	69036834	69037143	23	5.56	54.4	MACS_peak_2191	69036483	69037356	295	52	17.98	2321.37	intron (NM_133509, intron 10 of 10)	intron (NM_133509, intron 10 of 10)	223643	223712	NM_004926	677	Hs.85155	NM_004926	ENSG00000185650	ZFP36L1	BRF1|Berg36|ERF-1|ERF1|RNF162B|TIS11B|cMG1	ZFP36 ring finger protein-like 1	protein-coding	1.60548
chr14	MACS_peak_149	74251364	74251831	43	10.56	117.76	MACS_peak_2214	74251354	74251954	106	20	9.45	463.21	intron (NM_001043318, intron 1 of 11)	intron (NM_001043318, intron 1 of 11)	2364	2307	NM_001043318	91748	Hs.594157	NM_194278	ENSG00000156030	ELMSAN1	C14orf117|C14orf43|LSR68|MIDEAS|c14_5541	ELM2 and Myb/SANT-like domain containing 1	protein-coding	1.96409
chr14	MACS_peak_153	77866564	77867039	38	7.27	98.07	MACS_peak_2251	77866388	77867221	221	33	14.86	1882.66	intron (NM_001113475, intron 5 of 5)	MER4A|LTR|ERV1	22598	22595	NM_001113475	122945	Hs.97556	NM_138791	ENSG00000165555	NOXRED1	C14orf148	NADP-dependent oxidoreductase domain containing 1	protein-coding	1.49024
chr14	MACS_peak_156	91742637	91742962	24	6.32	73.53	MACS_peak_2273	91742666	91743309	379	171	42.61	314.17	intron (NM_001080414, intron 29 of 29)	intron (NM_001080414, intron 29 of 29)	-22575	-22763	NM_003485	8111	Hs.8882	NM_003485	ENSG00000119714	GPR68	GPR12A|OGR1	G protein-coupled receptor 68	protein-coding	2.43931
chr14	MACS_peak_158	93483639	93484154	45	5.33	110.16	MACS_peak_2284	93483451	93484354	345	49	10.68	2391.9	intron (NM_001142593, intron 3 of 10)	intron (NM_001142593, intron 3 of 10)	-49901	-49895	NR_002808	319085	Hs.612888	NR_002808	ENSG00000258730	ITPK1-AS1	C14orf85|ITPK1-AS|ITPK1AS|NCRNA00203	ITPK1 antisense RNA 1	ncRNA	1
chr14	MACS_peak_160	104159661	104160318	51	6.38	119.07	MACS_peak_2362	104159567	104160478	282	51	6.96	3100	intron (NM_001130107, intron 14 of 15)	(CCCCG)n|Simple_repeat|Simple_repeat	21834	21801	NM_001100118	7517	Hs.592325	NM_005432	ENSG00000126215	XRCC3	CMM6	X-ray repair complementing defective repair in Chinese hamster cells 3	protein-coding	1.68308
chr15	MACS_peak_164	51056925	51058101	96	3.61	54.99	MACS_peak_2432	51056687	51057761	353	101	16.02	244.99	intron (NM_032802, intron 1 of 14)	intron (NM_032802, intron 1 of 14)	397	686	NM_032802	84888	Hs.401537	NM_032802		SPPL2A	IMP3|PSL2	signal peptide peptidase like 2A	protein-coding	0.906549
chr15	MACS_peak_167	63671589	63672353	176	5.63	114.67	MACS_peak_2464	63672024	63672537	214	24	10.8	57.96	intron (NM_206925, intron 1 of 9)	intron (NM_206925, intron 1 of 9)	2338	2029	NM_001218	771	Hs.210995	NM_001218		CA12	CAXII|HsT18816	carbonic anhydrase XII	protein-coding	3.36896
chr15	MACS_peak_170	70755109	70755816	61	3.96	56	MACS_peak_2507	70755114	70755892	215	35	16.67	196.12	Intergenic	Intergenic	-152424	-152383	NR_126481	104548972		NR_126481	ENSG00000281264	SALRNA3	SAL-RNA3|XLOC_025918	senescence associated long non-coding RNA 3	ncRNA	1
chr15	MACS_peak_172	71388893	71389498	48	5.93	104.9	MACS_peak_2511	71388734	71389662	330	52	12.38	1641.02	Intergenic	Intergenic	18644	18641	NM_001102658	196993	Hs.646533	NM_001102658	ENSG00000225362	CT62	-	cancer/testis antigen 62	protein-coding	1.16668
chr15	MACS_peak_173	74211193	74211749	76	5.03	103.93	MACS_peak_2524	74210921	74211548	351	44	12.18	218.07	non-coding (NR_040068, exon 3 of 3)	non-coding (NR_040068, exon 3 of 3)	-7318	-7555	NM_005576	4016	Hs.65436	NM_005576	ENSG00000129038	LOXL1	LOL|LOXL	lysyl oxidase-like 1	protein-coding	1.33457
chr15	MACS_peak_174	75109597	75110084	41	6.44	78.44	MACS_peak_2530	75109020	75110324	339	44	6.74	2100.72	intron (NM_021819, intron 4 of 13)	MIRb|SINE|MIR	4646	4478	NM_021819	79748	Hs.620644	NM_021819	ENSG00000140506	LMAN1L	ERGIC-53L|ERGL	lectin, mannose-binding, 1 like	protein-coding	1.00144
chr15	MACS_peak_179	84422651	84423280	73	3.88	55.7	MACS_peak_2565	84422430	84423382	379	102	21.93	496.33	intron (NM_001301110, intron 3 of 29)	MER20|DNA|hAT-Charlie	100127	100068	NM_001301110	57188	Hs.459162	NM_207517	ENSG00000156218	ADAMTSL3	ADAMTSL-3	ADAMTS like 3	protein-coding	0.921535
chr15	MACS_peak_181	90236886	90237388	50	4.88	63.13	MACS_peak_2603	90236744	90237309	325	90	35.71	109.34	intron (NM_020212, intron 1 of 16)	LTR47A|LTR|ERVL	3109	2998	NM_001284395	56964	Hs.177557	NM_020212	ENSG00000140527	WDR93	-	WD repeat domain 93	protein-coding	0.826019
chr15	MACS_peak_182	90325201	90325862	58	4.78	81.3	MACS_peak_2604	90325318	90326035	184	58	16.5	449.73	Intergenic	MER41B|LTR|ERV1	5942	6087	NM_001039958	145873	Hs.37311	NM_001039958	ENSG00000188095	MESP2	SCDO2|bHLHc6	mesoderm posterior bHLH transcription factor 2	protein-coding	0.975901
chr15	MACS_peak_185	93188831	93189345	46	3.67	56.48	MACS_peak_2620	93188630	93189403	205	19	9.53	2135.57	intron (NM_207446, intron 1 of 2)	intron (NM_207446, intron 1 of 2)	9943	10015	NM_207446	400451	Hs.27373	NM_207446	ENSG00000185442	FAM174B	-	family with sequence similarity 174, member B	protein-coding	0.819904
chr15	MACS_peak_186	93289030	93289656	109	5.07	69.46	MACS_peak_2621	93289084	93289720	816	108	16.71	519.47	Intergenic	Intergenic	-49371	-49312	NR_033769	728619	Hs.684129	NR_033769		ASB9P1	-	ankyrin repeat and SOCS box containing 9 pseudogene 1	pseudo	1.00144
chr15	MACS_peak_187	96437098	96438050	164	7.36	292.3	MACS_peak_2635	96437320	96439583	211	19	8.56	3100	Intergenic	Intergenic	-431583	-430706	NM_001145155	7026	Hs.347991	NM_021005	ENSG00000185551	NR2F2	ARP1|CHTD4|COUPTFB|COUPTFII|NF-E3|NR2F1|SVP40|TFCOUP2	nuclear receptor subfamily 2, group F, member 2	protein-coding	1.19299
chr15	MACS_peak_189	101788654	101789102	32	4.44	58.15	MACS_peak_2665	101788320	101789066	205	25	12.53	517.97	intron (NM_014918, intron 1 of 2)	intron (NM_014918, intron 1 of 2)	3259	3444	NM_014918	22856	Hs.110488	NM_014918	ENSG00000131873	CHSY1	CHSY|CSS1|ChSy-1|TPBS	chondroitin sulfate synthase 1	protein-coding	2.58209
chr16	MACS_peak_191	377058	377525	37	6.19	68.48	MACS_peak_2673	376897	377630	316	64	20.78	2797.02	intron (NM_003502, intron 2 of 10)	intron (NM_003502, intron 2 of 10)	25385	25413	NM_003502	8312	Hs.592082	NM_003502	ENSG00000103126	AXIN1	AXIN|PPP1R49	axin 1	protein-coding	3.14959
chr16	MACS_peak_195	4202228	4202711	51	9.52	184.48	MACS_peak_2716	4201987	4202789	232	36	8.77	2035.59	Intergenic	Intergenic	-36283	-36202	NM_001116	115	Hs.391860	NM_001116	ENSG00000162104	ADCY9	AC9|ACIX	adenylate cyclase 9	protein-coding	3.3587
chr16	MACS_peak_198	14463994	14464761	107	7.47	188.01	MACS_peak_2761	14463877	14464641	193	71	24.44	808.2	promoter-TSS (NR_131191)	promoter-TSS (NR_131191)	-254	-136	NR_131191	105447648	Hs.554151	NR_131191		LOC105447648	-	uncharacterized LOC105447648	ncRNA	1
chr16	MACS_peak_199	15090501	15090864	28	5.06	52.18	MACS_peak_2767	15090349	15091139	253	90	58.77	630.05	intron (NM_001285448, intron 2 of 21)	intron (NM_001285448, intron 2 of 21)	21862	21924	NM_001285450	23042	Hs.370781	NM_015027	ENSG00000179889	PDXDC1	LP8165	pyridoxal-dependent decarboxylase domain containing 1	protein-coding	1.32008
chr16	MACS_peak_202	25051751	25052501	168	5.22	108.06	MACS_peak_2807	25051576	25052404	1013	142	3.55	408.04	Intergenic	L4|LINE|RTE	9064	8928	NR_038379	554206	Hs.552959	NR_038379	ENSG00000262587	LOC554206	-	leucine carboxyl methyltransferase 1 pseudogene	pseudo	1
chr16	MACS_peak_203	29471016	29471789	140	4.64	56.53	MACS_peak_2824	29470896	29471724	497	39	5.54	517.98	intron (NM_001017390, intron 1 of 7)	intron (NM_001017390, intron 1 of 7)	195	103	NM_177552	6818	Hs.460558	NM_003166	ENSG00000261052	SULT1A3	HAST|HAST3|M-PST|ST1A3|ST1A3/ST1A4|ST1A5|STM|TL-PST	sulfotransferase family 1A member 3	protein-coding	1.09162
chr16	MACS_peak_204	30076335	30077044	55	3.96	58.45	MACS_peak_2830	30076502	30077402	315	148	23.22	60.31	promoter-TSS (NM_184041)	promoter-TSS (NM_184041)	-305	-42	NM_184041	226	Hs.513490	NM_000034	ENSG00000149925	ALDOA	ALDA|GSD12|HEL-S-87p	aldolase A, fructose-bisphosphate	protein-coding	1.22213
chr16	MACS_peak_205	30210358	30211431	183	5.7	51.98	MACS_peak_2833	30210328	30211067	164	19	8.1	506.08	intron (NM_001017390, intron 1 of 7).2	intron (NM_001017390, intron 1 of 7).2	345	148	NM_177552	6818	Hs.460558	NM_003166	ENSG00000261052	SULT1A3	HAST|HAST3|M-PST|ST1A3|ST1A3/ST1A4|ST1A5|STM|TL-PST	sulfotransferase family 1A member 3	protein-coding	1.09162
chr16	MACS_peak_209	68741679	68742077	27	5	55.26	MACS_peak_2883	68741518	68742234	258	180	67.04	1783.55	Intergenic	Intergenic	-29317	-29319	NM_004360	999	Hs.461086	NM_004360	ENSG00000039068	CDH1	Arc-1|CD324|CDHE|ECAD|LCAM|UVO	cadherin 1, type 1	protein-coding	1.85514
chr16	MACS_peak_210	70170513	70170880	31	6.22	61.97	MACS_peak_2894	70170045	70171098	323	21	6.21	1336.24	intron (NM_017990, intron 10 of 18)	MARNA|DNA|TcMar-Mariner	23167	23042	NM_017990	55066	Hs.744043	NM_017990	ENSG00000090857	PDPR	PDP3	pyruvate dehydrogenase phosphatase regulatory subunit	protein-coding	1.53931
chr16	MACS_peak_211	72963253	72963711	32	6.12	59.05	MACS_peak_2902	72963146	72963908	339	32	10.68	1677.23	intron (NM_001164766, intron 2 of 8)	intron (NM_001164766, intron 2 of 8)	118792	118747	NM_006885	463	Hs.598297	NM_006885	ENSG00000140836	ZFHX3	ATBF1|ATBT|ZNF927	zinc finger homeobox 3	protein-coding	1.91596
chr16	MACS_peak_212	72978829	72979340	69	6.34	95.35	MACS_peak_2904	72978733	72979202	258	76	11.54	467.51	intron (NM_001164766, intron 2 of 8)	intron (NM_001164766, intron 2 of 8)	103190	103307	NM_006885	463	Hs.598297	NM_006885	ENSG00000140836	ZFHX3	ATBF1|ATBT|ZNF927	zinc finger homeobox 3	protein-coding	1.91596
chr16	MACS_peak_214	79071400	79071739	24	6.67	59.16	MACS_peak_2926	79071258	79072014	274	68	27.53	564.5	intron (NM_001291997, intron 7 of 7)	intron (NM_001291997, intron 7 of 7)	563053	562986	NM_005360	4094	Hs.134859	NM_005360	ENSG00000178573	MAF	AYGRP|CCA4|CTRCT21|c-MAF	v-maf avian musculoaponeurotic fibrosarcoma oncogene homolog	protein-coding	1.30515
chr16	MACS_peak_219	85322563	85322832	18	6.48	52.66	MACS_peak_2973	85321704	85323081	235	55	23.59	684.02	TTS (NR_038859)	TTS (NR_038859)	6133	5828	NR_038859	197196	Hs.679002	NM_153238	ENSG00000179219	LINC00311	NCRNA00311|TMEM148	long intergenic non-protein coding RNA 311	ncRNA	0.760766
chr16	MACS_peak_220	85339628	85340103	41	10.1	129.21	MACS_peak_2974	85339523	85340286	362	38	7.31	1293.12	promoter-TSS (NR_049816)	promoter-TSS (NR_049816)	66	27	NR_049816	100847022		NR_049816	ENSG00000266307	MIR5093	-	microRNA 5093	ncRNA	1.31636
chr16	MACS_peak_221	85492420	85493013	55	4.11	55.09	MACS_peak_2979	85492439	85493005	313	57	12.18	150.04	Intergenic	Intergenic	-152313	-152307	NM_001134473	23199	Hs.461647	NM_014615	ENSG00000131149	GSE1	KIAA0182	Gse1 coiled-coil protein	protein-coding	2.37722
chr16	MACS_peak_222	85499484	85500041	49	9.32	134.03	MACS_peak_2981	85499507	85500225	1124	190	39.47	2894.29	Intergenic	Intergenic	-145267	-145163	NM_001134473	23199	Hs.461647	NM_014615	ENSG00000131149	GSE1	KIAA0182	Gse1 coiled-coil protein	protein-coding	2.37722
chr16	MACS_peak_226	88990211	88990556	25	4.63	50.94	MACS_peak_3028	88990021	88990765	279	52	9.26	1696.98	intron (NM_005187, intron 1 of 11)	intron (NM_005187, intron 1 of 11)	-16064	-16054	NM_001290330	100129697	Hs.689377	NM_001290330		LOC100129697	-	uncharacterized LOC100129697	protein-coding	1
chr16	MACS_peak_227	88993425	88994031	52	3.92	78.89	MACS_peak_3029	88992617	88994390	341	33	8.22	2381.88	intron (NM_005187, intron 1 of 11)	intron (NM_005187, intron 1 of 11)	-12719	-12944	NM_001290330	100129697	Hs.689377	NM_001290330		LOC100129697	-	uncharacterized LOC100129697	protein-coding	1
chr16	MACS_peak_228	88994711	88995334	59	5	79.36	MACS_peak_3030	88994419	88996561	106	15	11.73	2072.87	intron (NM_005187, intron 1 of 11)	L2a|LINE|L2	-11425	-10957	NM_001290330	100129697	Hs.689377	NM_001290330		LOC100129697	-	uncharacterized LOC100129697	protein-coding	1
chr17	MACS_peak_234	13654837	13655083	14	8.02	50.28	MACS_peak_3101	13654739	13655161	259	26	12.71	106.63	Intergenic	Intergenic	-149701	-149691	NM_006042	9955	Hs.462270	NM_006042		HS3ST3A1	3-OST-3A|3OST3A1	heparan sulfate (glucosamine) 3-O-sulfotransferase 3A1	protein-coding	4.53929
chr17	MACS_peak_235	15549394	15550108	186	4.85	68.85	MACS_peak_3108	15549413	15549934	361	78	53.76	292.26	intron (NM_006470, intron 4 of 8)	intron (NM_006470, intron 4 of 8)	-26733	-26655	NM_001282540	374286	Hs.548021	NM_006382	ENSG00000241322	CDRT1	C170RF1|C17ORF1|C17ORF1A|FBXW10B|FBXW10P1|HREP|SM25H2	CMT1A duplicated region transcript 1	protein-coding	0.89527
chr17	MACS_peak_237	18621474	18622250	235	5.18	163.84	MACS_peak_3129	18621813	18622342	333	51	30.7	195.59	Intergenic	Intergenic	-3540	-3325	NM_001037330	147166	Hs.164324	NM_001037330	ENSG00000108448	TRIM16L	TRIM70	tripartite motif containing 16-like	protein-coding	0.934221
chr17	MACS_peak_238	21131259	21131877	82	5.78	77.71	MACS_peak_3138	21131391	21131914	223	24	9.45	134.18	Intergenic	Intergenic	-13660	-13744	NM_003876	8834	Hs.592945	NM_003876		TMEM11	C17orf35|PM1|PMI	transmembrane protein 11	protein-coding	1.02964
chr17	MACS_peak_239	38604938	38605307	23	9.02	85.3	MACS_peak_3184	38604691	38605504	350	111	54.58	2076.5	intron (NM_001552, intron 1 of 3)	intron (NM_001552, intron 1 of 3)	5446	5421	NM_001552	3487	Hs.462998	NM_001552	ENSG00000141753	IGFBP4	BP-4|HT29-IGFBP|IBP4|IGFBP-4	insulin like growth factor binding protein 4	protein-coding	4.81003
chr17	MACS_peak_243	45770498	45770891	31	4.73	53.23	MACS_peak_3220	45770277	45771344	336	59	5.33	1037.66	Intergenic	Intergenic	-1936	-1820	NM_014726	9755	Hs.94790	NM_014726	ENSG00000198933	TBKBP1	ProSAPiP2|SINTBAD	TBK1 binding protein 1	protein-coding	5.94786
chr17	MACS_peak_245	49021481	49022370	118	6.08	141.45	MACS_peak_3246	49021380	49022483	266	40	7.98	3100	Intergenic	CpG	-76586	-76592	NM_001243877	10140	Hs.703321	NM_005749	ENSG00000141232	TOB1	APRO6|PIG49|TOB|TROB|TROB1	transducer of ERBB2, 1	protein-coding	1.46346
chr17	MACS_peak_246	55162373	55163462	95	3.56	63.7	MACS_peak_3257	55162744	55163500	780	295	65.11	1429.46	promoter-TSS (NM_001242903)	promoter-TSS (NM_001242903)	-161	-13	NM_001242902	8165	Hs.463506	NM_003488	ENSG00000121057	AKAP1	AKAP|AKAP121|AKAP149|AKAP84|D-AKAP1|PPP1R43|PRKA1|SAKAP84|TDRD17	A kinase (PRKA) anchor protein 1	protein-coding	2.42379
chr17	MACS_peak_247	55243845	55244558	80	6.47	167.08	MACS_peak_3260	55243587	55244783	951	108	11.8	1799.48	Intergenic	Intergenic	81066	81050	NM_001242902	8165	Hs.463506	NM_003488	ENSG00000121057	AKAP1	AKAP|AKAP121|AKAP149|AKAP84|D-AKAP1|PPP1R43|PRKA1|SAKAP84|TDRD17	A kinase (PRKA) anchor protein 1	protein-coding	2.42379
chr17	MACS_peak_248	55911366	55912056	79	4.05	74.24	MACS_peak_3272	55910357	55912046	278	94	7.47	585.39	Intergenic	Intergenic	15722	16232	NM_016070	51649	Hs.5836	NM_016070		MRPS23	CGI-138|HSPC329|MRP-S23	mitochondrial ribosomal protein S23	protein-coding	0.982101
chr17	MACS_peak_249	55976236	55977858	144	4.23	71.87	MACS_peak_3277	55976487	55977735	327	143	23.07	841.39	intron (NM_001271875, intron 1 of 10)	intron (NM_001271875, intron 1 of 10)	3703	3639	NM_001292025	404093	Hs.46679	NM_001271875	ENSG00000180891	CUEDC1	-	CUE domain containing 1	protein-coding	2.48568
chr17	MACS_peak_253	64929228	64930068	149	7.63	270.88	MACS_peak_3313	64928836	64930556	423	56	6.94	1026.68	Intergenic	MIRb|SINE|MIR	-31332	-31284	NM_014405	27092	Hs.514423	NM_014405	ENSG00000075461	CACNG4	-	calcium channel, voltage-dependent, gamma subunit 4	protein-coding	2.00426
chr17	MACS_peak_255	70614009	70614608	51	5.83	84.54	MACS_peak_3336	70613831	70614578	326	157	58.48	1378.41	intron (NR_033876, intron 3 of 4)	intron (NR_033876, intron 3 of 4)	22303	22407	NR_033876	400619	Hs.447555	NR_033876	ENSG00000227036	LINC00511	LCAL5|onco-lncRNA-12	long intergenic non-protein coding RNA 511	ncRNA	2.78284
chr17	MACS_peak_256	72754350	72754625	17	8.28	53.49	MACS_peak_3356	72754300	72754964	437	443	54.32	728.83	intron (NM_004252, intron 1 of 5)	intron (NM_004252, intron 1 of 5)	9735	9880	NR_037409	100500847		NR_037409	ENSG00000264624	MIR3615	mir-3615	microRNA 3615	ncRNA	1
chr17	MACS_peak_257	72756861	72757230	30	6.35	89.62	MACS_peak_3358	72756638	72757384	125	25	10.31	2235.54	intron (NM_004252, intron 1 of 5)	MIRc|SINE|MIR	12293	12259	NR_037409	100500847		NR_037409	ENSG00000264624	MIR3615	mir-3615	microRNA 3615	ncRNA	1
chr17	MACS_peak_258	72765828	72766503	51	8.15	153.89	MACS_peak_3359	72765641	72767600	280	33	8.77	2106.79	TTS (NM_001305085)	TTS (NM_001305085)	6399	5944	NM_001305086	26151	Hs.144058	NM_015654	ENSG00000109065	NAT9	EBSP, hNATL	N-acetyltransferase 9 (GCN5-related, putative)	protein-coding	1.11094
chr18	MACS_peak_265	20839420	20839896	53	4.58	58	MACS_peak_3482	20839372	20840007	227	18	11.73	83.59	non-coding (NR_023359, exon 7 of 7)	non-coding (NR_023359, exon 7 of 7)	103869	103900	NM_138375	91768	Hs.11108	NM_138375	ENSG00000134508	CABLES1	CABL1|CABLES|HsT2563|IK3-1	Cdk5 and Abl enzyme substrate 1	protein-coding	1.17599
chr18	MACS_peak_266	21302473	21303002	43	4.84	54.44	MACS_peak_3490	21302585	21303058	254	39	26.39	348.55	intron (NM_198129, intron 2 of 74)	intron (NM_198129, intron 2 of 74)	33330	33414	NM_001127717	3909	Hs.436367	NM_000227	ENSG00000053747	LAMA3	BM600|E170|LAMNA|LOCS	laminin, alpha 3	protein-coding	2.3287
chr18	MACS_peak_267	43382636	43382982	21	11.43	72.96	MACS_peak_3507	43382467	43383186	135	37	5.2	1518.38	Intergenic	Intergenic	-22736	-22719	NM_213602	284266	Hs.287692	NM_213602	ENSG00000197046	SIGLEC15	CD33L3|HsT1361|SIGLEC-15	sialic acid binding Ig-like lectin 15	protein-coding	1.58569
chr19	MACS_peak_269	1185498	1185849	24	5.87	54.29	MACS_peak_3568	1185465	1186056	252	42	22.23	406.7	Intergenic	MER20|DNA|hAT-Charlie	-11391	-11478	NM_014963	22904	Hs.408708	NM_014963	ENSG00000064932	SBNO2	KIAA0963|SNO|STNO	strawberry notch homolog 2 (Drosophila)	protein-coding	2.58531
chr19	MACS_peak_271	11039301	11039684	32	4.33	52.07	MACS_peak_3632	11039099	11039713	175	17	10.23	70.98	promoter-TSS (NM_138358)	promoter-TSS (NM_138358)	68	-18	NM_138358	90580	Hs.164026	NM_138358	ENSG00000142444	C19orf52	-	chromosome 19 open reading frame 52	protein-coding	1
chr19	MACS_peak_275	16574750	16575085	21	6	50.97	MACS_peak_3674	16574286	16575258	134	21	10.27	705.48	intron (NM_001258375, intron 1 of 21)	L2c|LINE|L2	7906	8051	NM_001258374	58513	Hs.654639	NM_021235	ENSG00000127527	EPS15L1	EPS15R	epidermal growth factor receptor pathway substrate 15-like 1	protein-coding	1.66851
chr19	MACS_peak_278	39602266	39602570	18	7.5	54.08	MACS_peak_3759	39602082	39602764	402	104	39.11	763.46	TTS (NM_001004318)	TTS (NM_001004318)	-14002	-13997	NM_001014834	10298	Hs.20447	NM_005884	ENSG00000130669	PAK4	-	p21 protein (Cdc42/Rac)-activated kinase 4	protein-coding	1.93087
chr19	MACS_peak_280	46080875	46081254	28	6.67	79.92	MACS_peak_3790	46080437	46081332	331	100	46.25	1364.11	intron (NM_025136, intron 1 of 1)	intron (NM_025136, intron 1 of 1)	7058	7238	NM_001017989	80207	Hs.466945	NM_025136	ENSG00000125741	OPA3	MGA3	optic atrophy 3 (autosomal recessive, with chorea and spastic paraplegia)	protein-coding	1.34618
chr20	MACS_peak_331	47480433	47482064	189	3.18	67.46	MACS_peak_4738	47478397	47487425	3076	1110	26.32	291.95	Intergenic	MER5A1|DNA|hAT-Charlie	-36828	-38491	NM_020820	57580	Hs.153310	NM_020820	ENSG00000124126	PREX1	P-REX1	phosphatidylinositol-3,4,5-trisphosphate-dependent Rac exchange factor 1	protein-coding	2.02405
chr20	MACS_peak_333	48901147	48902039	87	3.83	91.99	MACS_peak_4752	48900695	48902207	702	225	25.55	699.49	Intergenic	Intergenic	-7664	-7806	NR_034124	284751	Hs.282325	NM_001025463	ENSG00000203999	LINC01270	-	long intergenic non-protein coding RNA 1270	ncRNA	0.971771
chr20	MACS_peak_335	55181609	55182117	52	4.52	59.6	MACS_peak_4773	55180903	55182201	907	150	27.15	497.43	Intergenic	Intergenic	-22495	-22806	NM_003222	7022	Hs.473152	NM_003222	ENSG00000087510	TFAP2C	AP2-GAMMA|ERF1|TFAP2G|hAP-2g	transcription factor AP-2 gamma (activating enhancer binding protein 2 gamma)	protein-coding	1.80949
chr20	MACS_peak_336	55310191	55310718	56	5.57	73.76	MACS_peak_4776	55309877	55310977	624	290	32.09	1089.76	Intergenic	L2b|LINE|L2	106096	106069	NM_003222	7022	Hs.473152	NM_003222	ENSG00000087510	TFAP2C	AP2-GAMMA|ERF1|TFAP2G|hAP-2g	transcription factor AP-2 gamma (activating enhancer binding protein 2 gamma)	protein-coding	1.80949
chr20	MACS_peak_338	55333724	55334323	58	4.15	64.79	MACS_peak_4777	55333567	55334351	444	182	22.85	660.32	Intergenic	L2a|LINE|L2	129665	129601	NM_003222	7022	Hs.473152	NM_003222	ENSG00000087510	TFAP2C	AP2-GAMMA|ERF1|TFAP2G|hAP-2g	transcription factor AP-2 gamma (activating enhancer binding protein 2 gamma)	protein-coding	1.80949
chr20	MACS_peak_345	58637694	58638521	77	3.6	63.62	MACS_peak_4801	58637633	58638626	727	414	33.87	2389.96	intron (NM_173644, intron 2 of 3)	intron (NM_173644, intron 2 of 3)	7127	7149	NM_001302813	284756	Hs.335319	NM_173644		C20orf197	-	chromosome 20 open reading frame 197	protein-coding	1.09162
chr21	MACS_peak_348	32901718	32902135	31	8	88.27	MACS_peak_4881	32901633	32902251	262	133	65.16	950.79	intron (NM_003253, intron 1 of 28)	intron (NM_003253, intron 1 of 28)	29364	29348	NM_003253	7074	Hs.517228	NM_003253	ENSG00000156299	TIAM1	-	T-cell lymphoma invasion and metastasis 1	protein-coding	1.66571
chr21	MACS_peak_349	36106832	36107257	31	4.73	54.72	MACS_peak_4890	36106878	36107482	301	196	61.03	1390.56	intron (NR_024351, intron 1 of 5)	intron (NR_024351, intron 1 of 5)	2435	2299	NR_024351	54064	Hs.436868	NR_024351	ENSG00000230978	LINC00160	C21orf52|NCRNA00160	long intergenic non-protein coding RNA 160	ncRNA	1.12086
chr21	MACS_peak_351	41696075	41696844	119	4.61	68.1	MACS_peak_4926	41696157	41697246	439	487	36.92	2617.87	intron (NR_073202, intron 8 of 32)	intron (NR_073202, intron 8 of 32)	-58551	-58309	NR_038898	100506492	Hs.667053	NR_038896	ENSG00000235123	DSCAM-AS1	M41	DSCAM antisense RNA 1	ncRNA	0.868466
chr21	MACS_peak_352	43796275	43796913	67	9.7	223.03	MACS_peak_4948	43796290	43796992	317	352	31.3	1689.8	intron (NR_046020, intron 11 of 12)	intron (NR_046020, intron 11 of 12)	-9950	-9997	NM_003225	7031	Hs.162807	NM_003225	ENSG00000160182	TFF1	BCEI|D21S21|HP1.A|HPS2|pNR-2|pS2	trefoil factor 1	protein-coding	1.0349
chr21	MACS_peak_355	44914238	44914575	24	6.67	66.75	MACS_peak_4960	44914073	44914429	161	19	10.18	66.05	Intergenic	Intergenic	-16303	-16148	NR_026863	114038	Hs.592161	NM_153752	ENSG00000185186	LINC00313	C21orf84|CH507-42P11.5|NCRNA00313	long intergenic non-protein coding RNA 313	ncRNA	1
chr21	MACS_peak_358	47712454	47713652	132	6.3	110.4	MACS_peak_4998	47712314	47714859	246	928	8.79	2279.59	intron (NM_001314023, intron 3 of 4)	MER87|LTR|ERV1	6809	7342	NM_001314024	54059	Hs.474066	NM_058181	ENSG00000182362	YBEY	C21orf57	ybeY metallopeptidase (putative)	protein-coding	0.72166
chr22	MACS_peak_364	45676568	45676884	19	10	57.65	MACS_peak_5106	45676467	45676873	200	26	16.57	117.83	Intergenic	Intergenic	-4142	-4198	NM_001167574	7380	Hs.632787	NM_006953	ENSG00000100373	UPK3A	UP3A|UPIII|UPIIIA|UPK3	uroplakin 3A	protein-coding	1.14678
chrX	MACS_peak_566	109417148	109417437	18	5.93	50.19	MACS_peak_8249	109417171	109417525	242	22	15.59	96.13	3' UTR (NM_017698, exon 6 of 6)	3' UTR (NM_017698, exon 6 of 6)	50996	50940	NR_004379	692226		NR_004379	ENSG00000208883	SNORD96B	U96b	small nucleolar RNA, C/D box 96B	snoRNA	1
