# Supplementary material for: Heat shock factor 1 (HSF1) cooperates with estrogen receptor α (ERα) in the regulation of estrogen action in breast cancer cells
Source: eLife. 2021 Nov 16;10:e69843. doi: 10.7554/eLife.69843 (PMC8709578; doi:10.7554/eLife.69843)
Supplement: Supplementary file 4. [file elife-69843-supp4.xlsx]

## Sheet: ERα_ChIA-PET reads
Peak ID	Chr	Start	End	Distance to TSS	Nearest PromoterID	Entrez ID	Gene Name	Gene Description	ERE	HSE
ERα_CHIA-PET_0001	chr1	6160838	6161455	54972	NM_001199863	8514	KCNAB2	potassium channel, voltage gated subfamily A regulatory beta subunit 2	+
ERα_CHIA-PET_0002	chr1	6217754	6218682	21976	NM_015557	26038	CHD5	chromodomain helicase DNA binding protein 5	+
ERα_CHIA-PET_0003	chr1	6969615	6970163	124505	NM_001242701	23261	CAMTA1	calmodulin binding transcription activator 1		+
ERα_CHIA-PET_0004	chr1	7019310	7020229	174385	NM_001242701	23261	CAMTA1	calmodulin binding transcription activator 1	+
ERα_CHIA-PET_0005	chr1	7053907	7054407	208773	NM_001242701	23261	CAMTA1	calmodulin binding transcription activator 1
ERα_CHIA-PET_0006	chr1	7283646	7284530	438704	NM_001242701	23261	CAMTA1	calmodulin binding transcription activator 1
ERα_CHIA-PET_0007	chr1	7288526	7289356	443557	NM_001242701	23261	CAMTA1	calmodulin binding transcription activator 1		+
ERα_CHIA-PET_0008	chr1	7342227	7343404	-488514	NM_004781	9341	VAMP3	vesicle associated membrane protein 3		+
ERα_CHIA-PET_0009	chr1	7346952	7347596	-484055	NM_004781	9341	VAMP3	vesicle associated membrane protein 3	+
ERα_CHIA-PET_0010	chr1	7507594	7508498	-323283	NM_004781	9341	VAMP3	vesicle associated membrane protein 3	+
ERα_CHIA-PET_0011	chr1	7526734	7527591	-304167	NM_004781	9341	VAMP3	vesicle associated membrane protein 3
ERα_CHIA-PET_0012	chr1	8455282	8456124	28044	NM_001042682	473	RERE	arginine-glutamic acid dipeptide (RE) repeats	+
ERα_CHIA-PET_0013	chr1	10674615	10675133	139871	NM_004565	5195	PEX14	peroxisomal biogenesis factor 14
ERα_CHIA-PET_0014	chr1	10784746	10785323	71699	NM_001079843	54897	CASZ1	castor zinc finger 1
ERα_CHIA-PET_0015	chr1	10795560	10796463	60722	NM_001079843	54897	CASZ1	castor zinc finger 1	+
ERα_CHIA-PET_0016	chr1	10810947	10811751	45384	NM_001079843	54897	CASZ1	castor zinc finger 1
ERα_CHIA-PET_0017	chr1	12513824	12514675	-53051	NR_003025	677885	SNORA59A	small nucleolar RNA, H/ACA box 59A
ERα_CHIA-PET_0018	chr1	12544917	12547124	-21280	NR_003025	677885	SNORA59A	small nucleolar RNA, H/ACA box 59A	+	+
ERα_CHIA-PET_0019	chr1	12609310	12610258	29267	NR_106788	102466722	MIR6730	microRNA 6730	+
ERα_CHIA-PET_0020	chr1	12659953	12661017	17252	NM_004753	9249	DHRS3	dehydrogenase/reductase (SDR family) member 3	+
ERα_CHIA-PET_0021	chr1	12675711	12676363	1700	NM_004753	9249	DHRS3	dehydrogenase/reductase (SDR family) member 3
ERα_CHIA-PET_0022	chr1	15252289	15253254	2146	NM_001018000	23254	KAZN	kazrin, periplakin interacting protein	+
ERα_CHIA-PET_0023	chr1	15303541	15304474	31592	NM_001017999	23254	KAZN	kazrin, periplakin interacting protein	+
ERα_CHIA-PET_0024	chr1	15343375	15344362	71453	NM_001017999	23254	KAZN	kazrin, periplakin interacting protein	+
ERα_CHIA-PET_0025	chr1	15351750	15352657	79788	NM_001017999	23254	KAZN	kazrin, periplakin interacting protein
ERα_CHIA-PET_0026	chr1	15374986	15375555	102855	NM_001017999	23254	KAZN	kazrin, periplakin interacting protein
ERα_CHIA-PET_0027	chr1	15731408	15732305	-4535	NM_024329	79180	EFHD2	EF-hand domain family member D2	+
ERα_CHIA-PET_0028	chr1	15789713	15790225	6746	NM_033440	63036	CELA2A	chymotrypsin-like elastase family, member 2A
ERα_CHIA-PET_0029	chr1	16934478	16935083	5320	NM_017940	55672	NBPF1	neuroblastoma breakpoint family, member 1		+
ERα_CHIA-PET_0030	chr1	16935088	16935592	4760	NM_017940	55672	NBPF1	neuroblastoma breakpoint family, member 1		+
ERα_CHIA-PET_0031	chr1	17563603	17564532	-11526	NM_016233	51702	PADI3	peptidyl arginine deiminase, type III	+
ERα_CHIA-PET_0032	chr1	17640797	17641925	6671	NM_012387	23569	PADI4	peptidyl arginine deiminase, type IV	+
ERα_CHIA-PET_0033	chr1	17828988	17829736	-36968	NM_018125	55160	ARHGEF10L	Rho guanine nucleotide exchange factor 10 like	+
ERα_CHIA-PET_0034	chr1	17846726	17847691	-19122	NM_018125	55160	ARHGEF10L	Rho guanine nucleotide exchange factor 10 like	+
ERα_CHIA-PET_0035	chr1	17855475	17856551	-10317	NM_018125	55160	ARHGEF10L	Rho guanine nucleotide exchange factor 10 like	+
ERα_CHIA-PET_0036	chr1	17886030	17886970	20170	NM_018125	55160	ARHGEF10L	Rho guanine nucleotide exchange factor 10 like
ERα_CHIA-PET_0037	chr1	17903773	17904749	-2787	NM_001011722	55160	ARHGEF10L	Rho guanine nucleotide exchange factor 10 like
ERα_CHIA-PET_0038	chr1	18160637	18161309	79165	NM_030812	81569	ACTL8	actin-like 8	+
ERα_CHIA-PET_0039	chr1	18205183	18205978	123772	NM_030812	81569	ACTL8	actin-like 8	+
ERα_CHIA-PET_0040	chr1	18692039	18692841	-114984	NM_152375	127707	KLHDC7A	kelch domain containing 7A		+
ERα_CHIA-PET_0041	chr1	18710681	18711227	-96470	NM_152375	127707	KLHDC7A	kelch domain containing 7A	+
ERα_CHIA-PET_0042	chr1	19798262	19799236	12452	NM_001282162	832	CAPZB	capping protein (actin filament) muscle Z-line, beta
ERα_CHIA-PET_0043	chr1	19908378	19909316	-14624	NM_001032363	440574	MINOS1	mitochondrial inner membrane organizing system 1	+	+
ERα_CHIA-PET_0044	chr1	19918691	19920360	-3946	NM_001032363	440574	MINOS1	mitochondrial inner membrane organizing system 1	+
ERα_CHIA-PET_0045	chr1	19922753	19923822	-184	NM_001032363	440574	MINOS1	mitochondrial inner membrane organizing system 1	+
ERα_CHIA-PET_0046	chr1	20683578	20684502	66628	NM_001039500	127731	VWA5B1	von Willebrand factor A domain containing 5B1	+
ERα_CHIA-PET_0047	chr1	21567779	21568849	37869	NM_001113347	1889	ECE1	endothelin converting enzyme 1	+
ERα_CHIA-PET_0048	chr1	21578171	21579020	27588	NM_001113347	1889	ECE1	endothelin converting enzyme 1
ERα_CHIA-PET_0049	chr1	21580914	21581823	24815	NM_001113347	1889	ECE1	endothelin converting enzyme 1	+
ERα_CHIA-PET_0050	chr1	21594714	21595567	11043	NM_001113347	1889	ECE1	endothelin converting enzyme 1	+
ERα_CHIA-PET_0051	chr1	21771341	21772033	5104	NM_032264	84224	NBPF3	neuroblastoma breakpoint family, member 3
ERα_CHIA-PET_0052	chr1	21948601	21949236	29430	NM_001145658	5909	RAP1GAP	RAP1 GTPase activating protein
ERα_CHIA-PET_0053	chr1	21960487	21961317	17446	NM_001145658	5909	RAP1GAP	RAP1 GTPase activating protein
ERα_CHIA-PET_0054	chr1	22773668	22774627	-4197	NM_001083621	9923	ZBTB40	zinc finger and BTB domain containing 40
ERα_CHIA-PET_0055	chr1	22780951	22781724	2993	NM_014870	9923	ZBTB40	zinc finger and BTB domain containing 40
ERα_CHIA-PET_0056	chr1	22798778	22800221	21155	NM_014870	9923	ZBTB40	zinc finger and BTB domain containing 40	+
ERα_CHIA-PET_0057	chr1	22813656	22814189	35578	NM_014870	9923	ZBTB40	zinc finger and BTB domain containing 40
ERα_CHIA-PET_0058	chr1	22851496	22852017	-38248	NM_020526	2046	EPHA8	EPH receptor A8
ERα_CHIA-PET_0059	chr1	22952177	22953090	7226	NR_106742	102466615	MIR6127	microRNA 6127
ERα_CHIA-PET_0060	chr1	24327461	24328436	-20995	NM_001191006	10772	SRSF10	serine/arginine-rich splicing factor 10	+
ERα_CHIA-PET_0061	chr1	24344976	24345948	-38509	NM_001191006	10772	SRSF10	serine/arginine-rich splicing factor 10	+
ERα_CHIA-PET_0062	chr1	24894037	24895115	12009	NM_001010980	400746	NCMAP	noncompact myelin associated protein		+
ERα_CHIA-PET_0063	chr1	24896667	24897584	14558	NM_001010980	400746	NCMAP	noncompact myelin associated protein	+
ERα_CHIA-PET_0064	chr1	24931755	24932666	-37384	NM_005839	10250	SRRM1	serine/arginine repetitive matrix 1		+
ERα_CHIA-PET_0065	chr1	27240310	27241249	-212	NM_021969	8431	NR0B2	nuclear receptor subfamily 0, group B, member 2
ERα_CHIA-PET_0066	chr1	27274351	27275247	12102	NM_152365	126695	KDF1	keratinocyte differentiation factor 1
ERα_CHIA-PET_0067	chr1	30775793	30776673	-265774	NR_110790	101929406	LOC101929406	uncharacterized LOC101929406	+
ERα_CHIA-PET_0068	chr1	30805428	30806010	-295260	NR_110790	101929406	LOC101929406	uncharacterized LOC101929406	+
ERα_CHIA-PET_0069	chr1	30818480	30819016	-308289	NR_110790	101929406	LOC101929406	uncharacterized LOC101929406
ERα_CHIA-PET_0070	chr1	30855167	30855987	-336042	NR_034182	100129196	MATN1-AS1	MATN1 antisense RNA 1
ERα_CHIA-PET_0071	chr1	30934401	30935118	-256860	NR_034182	100129196	MATN1-AS1	MATN1 antisense RNA 1		+
ERα_CHIA-PET_0072	chr1	31659162	31660192	53057	NM_024522	79570	NKAIN1	Na+/K+ transporting ATPase interacting 1	+
ERα_CHIA-PET_0073	chr1	31702122	31703019	10164	NM_024522	79570	NKAIN1	Na+/K+ transporting ATPase interacting 1	+
ERα_CHIA-PET_0074	chr1	31841331	31842527	3994	NM_004102	2170	FABP3	fatty acid binding protein 3, muscle and heart	+
ERα_CHIA-PET_0075	chr1	32166686	32167289	2781	NM_001856	1307	COL16A1	collagen, type XVI, alpha 1
ERα_CHIA-PET_0076	chr1	32295689	32297006	-14695	NM_001281987	90853	SPOCD1	SPOC domain containing 1	+
ERα_CHIA-PET_0077	chr1	32308128	32309191	-27007	NM_001281987	90853	SPOCD1	SPOC domain containing 1		+
ERα_CHIA-PET_0078	chr1	32345321	32346628	39285	NM_001195100	8073	PTP4A2	protein tyrosine phosphatase type IVA, member 2	+
ERα_CHIA-PET_0079	chr1	32403958	32404858	-420	NM_080391	8073	PTP4A2	protein tyrosine phosphatase type IVA, member 2
ERα_CHIA-PET_0080	chr1	32791793	32792312	9788	NR_052852	65108	MARCKSL1	MARCKS-like 1	+
ERα_CHIA-PET_0081	chr1	34126045	34126807	188194	NM_145238	7579	ZSCAN20	zinc finger and SCAN domain containing 20	+
ERα_CHIA-PET_0082	chr1	34189293	34190129	-136365	NM_145205	127540	HMGB4	high mobility group box 4	+	+
ERα_CHIA-PET_0083	chr1	34190963	34191577	-134806	NM_145205	127540	HMGB4	high mobility group box 4		+
ERα_CHIA-PET_0084	chr1	35111176	35111778	23818	NR_030278	693137	MIR552	microRNA 552
ERα_CHIA-PET_0085	chr1	35161480	35162182	-26536	NR_030278	693137	MIR552	microRNA 552		+
ERα_CHIA-PET_0086	chr1	35253130	35254490	-4789	NM_002060	2701	GJA4	gap junction protein alpha 4	+	+
ERα_CHIA-PET_0087	chr1	35290637	35291873	32656	NM_002060	2701	GJA4	gap junction protein alpha 4	+
ERα_CHIA-PET_0088	chr1	39582450	39583207	32989	NM_012090	23499	MACF1	microtubule-actin crosslinking factor 1
ERα_CHIA-PET_0089	chr1	39608196	39609149	58833	NM_012090	23499	MACF1	microtubule-actin crosslinking factor 1		+
ERα_CHIA-PET_0090	chr1	39644371	39645389	95041	NM_012090	23499	MACF1	microtubule-actin crosslinking factor 1		+
ERα_CHIA-PET_0091	chr1	41372142	41373108	-44607	NM_133467	163732	CITED4	Cbp/p300-interacting transactivator, with Glu/Asp rich carboxy-terminal domain, 4		+
ERα_CHIA-PET_0092	chr1	41384635	41385205	-56902	NM_133467	163732	CITED4	Cbp/p300-interacting transactivator, with Glu/Asp rich carboxy-terminal domain, 4
ERα_CHIA-PET_0093	chr1	42153320	42154310	-203461	NM_001956	1907	EDN2	endothelin 2	+
ERα_CHIA-PET_0094	chr1	42175594	42176505	208329	NM_024503	59269	HIVEP3	human immunodeficiency virus type I enhancer binding protein 3		+
ERα_CHIA-PET_0095	chr1	42185014	42185750	198996	NM_024503	59269	HIVEP3	human immunodeficiency virus type I enhancer binding protein 3	+
ERα_CHIA-PET_0096	chr1	42230258	42231193	153653	NM_024503	59269	HIVEP3	human immunodeficiency virus type I enhancer binding protein 3
ERα_CHIA-PET_0097	chr1	42243694	42244760	140151	NM_024503	59269	HIVEP3	human immunodeficiency virus type I enhancer binding protein 3	+
ERα_CHIA-PET_0098	chr1	42254707	42256143	128953	NM_024503	59269	HIVEP3	human immunodeficiency virus type I enhancer binding protein 3	+
ERα_CHIA-PET_0099	chr1	42324074	42324765	59959	NM_024503	59269	HIVEP3	human immunodeficiency virus type I enhancer binding protein 3	+
ERα_CHIA-PET_0100	chr1	42325485	42326479	58396	NM_024503	59269	HIVEP3	human immunodeficiency virus type I enhancer binding protein 3	+
ERα_CHIA-PET_0101	chr1	42328002	42328942	55906	NM_024503	59269	HIVEP3	human immunodeficiency virus type I enhancer binding protein 3
ERα_CHIA-PET_0102	chr1	42331615	42332699	52221	NM_024503	59269	HIVEP3	human immunodeficiency virus type I enhancer binding protein 3	+
ERα_CHIA-PET_0103	chr1	42333464	42334510	50391	NM_024503	59269	HIVEP3	human immunodeficiency virus type I enhancer binding protein 3
ERα_CHIA-PET_0104	chr1	42617553	42618237	-1197	NM_007102	2981	GUCA2B	guanylate cyclase activator 2B (uroguanylin)
ERα_CHIA-PET_0105	chr1	42630966	42631778	-977	NM_033553	2980	GUCA2A	guanylate cyclase activator 2A (guanylin)
ERα_CHIA-PET_0106	chr1	43438965	43439612	-14441	NM_006516	6513	SLC2A1	solute carrier family 2 (facilitated glucose transporter), member 1	+
ERα_CHIA-PET_0107	chr1	43457718	43458493	-33258	NM_006516	6513	SLC2A1	solute carrier family 2 (facilitated glucose transporter), member 1
ERα_CHIA-PET_0108	chr1	43486914	43487893	-62556	NM_006516	6513	SLC2A1	solute carrier family 2 (facilitated glucose transporter), member 1
ERα_CHIA-PET_0109	chr1	48237278	48238171	224838	NM_001194986	388630	TRABD2B	TraB domain containing 2B
ERα_CHIA-PET_0110	chr1	48247626	48248443	214528	NM_001194986	388630	TRABD2B	TraB domain containing 2B	+
ERα_CHIA-PET_0111	chr1	48360440	48360976	101854	NM_001194986	388630	TRABD2B	TraB domain containing 2B	+
ERα_CHIA-PET_0112	chr1	48386505	48387390	75615	NM_001194986	388630	TRABD2B	TraB domain containing 2B	+
ERα_CHIA-PET_0113	chr1	51762799	51763697	385	NM_001297666	22996	TTC39A	tetratricopeptide repeat domain 39A	+	+
ERα_CHIA-PET_0114	chr1	51772273	51773321	-9164	NM_001297667	22996	TTC39A	tetratricopeptide repeat domain 39A	+	+
ERα_CHIA-PET_0115	chr1	51786742	51787783	678	NM_001080494	22996	TTC39A	tetratricopeptide repeat domain 39A	+
ERα_CHIA-PET_0116	chr1	51795677	51796630	83	NM_001297662	22996	TTC39A	tetratricopeptide repeat domain 39A
ERα_CHIA-PET_0117	chr1	52024185	52024889	-39542	NM_001981	2060	EPS15	epidermal growth factor receptor pathway substrate 15
ERα_CHIA-PET_0118	chr1	52033227	52034126	-48681	NM_001981	2060	EPS15	epidermal growth factor receptor pathway substrate 15
ERα_CHIA-PET_0119	chr1	57253136	57254119	31742	NM_001004303	199920	C1orf168	chromosome 1 open reading frame 168
ERα_CHIA-PET_0120	chr1	57276870	57277570	8149	NM_001004303	199920	C1orf168	chromosome 1 open reading frame 168	+
ERα_CHIA-PET_0121	chr1	61681232	61681758	37695	NR_104180	645030	NFIA-AS1	NFIA antisense RNA 1	+
ERα_CHIA-PET_0122	chr1	61869795	61870564	-150989	NR_104180	645030	NFIA-AS1	NFIA antisense RNA 1
ERα_CHIA-PET_0123	chr1	61961833	61962647	-157674	NR_073400	414927	MGC34796	sepiapterin reductase (7,8-dihydrobiopterin:NADP+ oxidoreductase) pseudogene
ERα_CHIA-PET_0124	chr1	65344424	65345403	87274	NM_002227	3716	JAK1	Janus kinase 1
ERα_CHIA-PET_0125	chr1	65448484	65449522	-16816	NM_002227	3716	JAK1	Janus kinase 1		+
ERα_CHIA-PET_0126	chr1	65462277	65463219	5411	NR_119383	101927084	LINC01359	long intergenic non-protein coding RNA 1359		+
ERα_CHIA-PET_0127	chr1	65509821	65510727	13251	NR_037443	100500854	MIR3671	microRNA 3671	+
ERα_CHIA-PET_0128	chr1	71914183	71914987	367578	NR_046217	100852410	ZRANB2-AS2	ZRANB2 antisense RNA 2 (head to head)	+	+
ERα_CHIA-PET_0129	chr1	71927225	71927813	375176	NR_046218	100852409	NEGR1-IT1	NEGR1 intronic transcript 1	+
ERα_CHIA-PET_0130	chr1	71994859	71995392	307570	NR_046218	100852409	NEGR1-IT1	NEGR1 intronic transcript 1	+
ERα_CHIA-PET_0131	chr1	84639503	84640001	-7563	NM_001242862	5567	PRKACB	protein kinase, cAMP-dependent, catalytic, beta
ERα_CHIA-PET_0132	chr1	85763264	85763881	-20985	NM_003921	8915	BCL10	B-cell CLL/lymphoma 10	+
ERα_CHIA-PET_0133	chr1	88758928	88759749	-390584	NM_006256	5586	PKN2	protein kinase N2	+
ERα_CHIA-PET_0134	chr1	88974741	88975604	-174750	NM_006256	5586	PKN2	protein kinase N2	+
ERα_CHIA-PET_0135	chr1	91852511	91853144	17599	NM_001017975	164045	HFM1	HFM1, ATP-dependent DNA helicase homolog
ERα_CHIA-PET_0136	chr1	94050733	94051289	-292	NM_001308251	8412	BCAR3	breast cancer anti-estrogen resistance 3		+
ERα_CHIA-PET_0137	chr1	94064729	94065466	7572	NR_034091	100129046	LOC100129046	uncharacterized LOC100129046
ERα_CHIA-PET_0138	chr1	94245175	94245750	-66926	NR_030621	100126348	MIR760	microRNA 760
ERα_CHIA-PET_0139	chr1	96525879	96526870	68750	NR_125991	102723661	LOC102723661	uncharacterized LOC102723661		+
ERα_CHIA-PET_0140	chr1	96538311	96539046	81054	NR_125991	102723661	LOC102723661	uncharacterized LOC102723661
ERα_CHIA-PET_0141	chr1	96629872	96630574	172599	NR_125991	102723661	LOC102723661	uncharacterized LOC102723661
ERα_CHIA-PET_0142	chr1	99961027	99961526	-7916	NR_125951	101928270	LOC101928270	uncharacterized LOC101928270
ERα_CHIA-PET_0143	chr1	107709445	107710012	19037	NM_001113226	22854	NTNG1	netrin G1	+
ERα_CHIA-PET_0144	chr1	107962914	107963877	267731	NM_001079874	10451	VAV3	vav 3 guanine nucleotide exchange factor	+
ERα_CHIA-PET_0145	chr1	108112617	108113379	118128	NM_001079874	10451	VAV3	vav 3 guanine nucleotide exchange factor	+	+
ERα_CHIA-PET_0146	chr1	108298834	108299349	-67965	NM_001079874	10451	VAV3	vav 3 guanine nucleotide exchange factor	+
ERα_CHIA-PET_0147	chr1	108696094	108696957	38906	NM_213651	29957	SLC25A24	solute carrier family 25 (mitochondrial carrier; phosphate carrier), member 24		+
ERα_CHIA-PET_0148	chr1	108741494	108742354	1056	NM_013386	29957	SLC25A24	solute carrier family 25 (mitochondrial carrier; phosphate carrier), member 24	+
ERα_CHIA-PET_0149	chr1	109658357	109658899	2043	NM_020775	57535	KIAA1324	KIAA1324
ERα_CHIA-PET_0150	chr1	109680227	109681499	24278	NM_020775	57535	KIAA1324	KIAA1324
ERα_CHIA-PET_0151	chr1	109691982	109692504	35658	NM_020775	57535	KIAA1324	KIAA1324
ERα_CHIA-PET_0152	chr1	109693558	109694552	-35116	NM_001284353	57535	KIAA1324	KIAA1324	+
ERα_CHIA-PET_0153	chr1	109694880	109695432	-34015	NM_001284353	57535	KIAA1324	KIAA1324	+
ERα_CHIA-PET_0154	chr1	109741535	109742750	12971	NM_001284353	57535	KIAA1324	KIAA1324	+	+
ERα_CHIA-PET_0155	chr1	109782531	109783337	-9707	NM_001408	1952	CELSR2	cadherin, EGF LAG seven-pass G-type receptor 2	+
ERα_CHIA-PET_0156	chr1	109788588	109789486	-3604	NM_001408	1952	CELSR2	cadherin, EGF LAG seven-pass G-type receptor 2	+
ERα_CHIA-PET_0157	chr1	112015500	112016534	-474	NM_174896	128346	C1orf162	chromosome 1 open reading frame 162	+
ERα_CHIA-PET_0158	chr1	112037701	112038220	8783	NM_001302678	140	ADORA3	adenosine A3 receptor
ERα_CHIA-PET_0159	chr1	112055762	112056762	-9519	NM_001302679	140	ADORA3	adenosine A3 receptor
ERα_CHIA-PET_0160	chr1	112118946	112119773	-12734	NM_001081976	57413	TMIGD3	transmembrane and immunoglobulin domain containing 3		+
ERα_CHIA-PET_0161	chr1	112135554	112136268	15029	NR_034126	100129269	LINC01160	long intergenic non-protein coding RNA 1160
ERα_CHIA-PET_0162	chr1	112213511	112214032	51002	NM_001291896	5906	RAP1A	RAP1A, member of RAS oncogene family
ERα_CHIA-PET_0163	chr1	112435999	112436857	-15851	NR_046619	100873995	KCND3-AS1	KCND3 antisense RNA 1
ERα_CHIA-PET_0164	chr1	112520948	112522002	10302	NM_172198	3752	KCND3	potassium channel, voltage gated Shal related subfamily D, member 3		+
ERα_CHIA-PET_0165	chr1	112530208	112531180	1083	NM_172198	3752	KCND3	potassium channel, voltage gated Shal related subfamily D, member 3
ERα_CHIA-PET_0166	chr1	114519334	114519854	-2419	NM_001286352	56944	OLFML3	olfactomedin like 3	+
ERα_CHIA-PET_0167	chr1	114542745	114543351	21035	NM_001286353	56944	OLFML3	olfactomedin like 3		+
ERα_CHIA-PET_0168	chr1	114576307	114577173	54727	NM_001286353	56944	OLFML3	olfactomedin like 3		+
ERα_CHIA-PET_0169	chr1	114585488	114586359	63910	NM_001286353	56944	OLFML3	olfactomedin like 3		+
ERα_CHIA-PET_0170	chr1	114632417	114633398	62155	NM_205848	148281	SYT6	synaptotagmin VI	+	+
ERα_CHIA-PET_0171	chr1	114759013	114759837	-62953	NM_001270805	148281	SYT6	synaptotagmin VI
ERα_CHIA-PET_0172	chr1	116495076	116495724	-23719	NM_018420	55356	SLC22A15	solute carrier family 22, member 15		+
ERα_CHIA-PET_0173	chr1	116551014	116551832	-31526	NR_125970	101928977	LOC101928977	uncharacterized LOC101928977
ERα_CHIA-PET_0174	chr1	116582393	116582973	-62786	NR_125970	101928977	LOC101928977	uncharacterized LOC101928977
ERα_CHIA-PET_0175	chr1	116810554	116811420	-104808	NM_000701	476	ATP1A1	ATPase, Na+/K+ transporting, alpha 1 polypeptide	+
ERα_CHIA-PET_0176	chr1	116854770	116855591	-60615	NM_000701	476	ATP1A1	ATPase, Na+/K+ transporting, alpha 1 polypeptide
ERα_CHIA-PET_0177	chr1	117724020	117724947	21975	NM_001253849	79679	VTCN1	V-set domain containing T cell activation inhibitor 1
ERα_CHIA-PET_0178	chr1	117811197	117812167	-26406	NR_126408	104355292	LINC01525	long intergenic non-protein coding RNA 1525	+
ERα_CHIA-PET_0179	chr1	118155068	118155566	6713	NM_017709	54855	FAM46C	family with sequence similarity 46, member C
ERα_CHIA-PET_0180	chr1	121484122	121485428	223865	NR_003955	647121	EMBP1	embigin pseudogene 1		+
ERα_CHIA-PET_0181	chr1	144988939	144989757	5685	NM_014644	9659	PDE4DIP	phosphodiesterase 4D interacting protein
ERα_CHIA-PET_0182	chr1	144992981	144993481	1802	NM_014644	9659	PDE4DIP	phosphodiesterase 4D interacting protein
ERα_CHIA-PET_0183	chr1	145029838	145030458	9847	NM_001198832	9659	PDE4DIP	phosphodiesterase 4D interacting protein		+
ERα_CHIA-PET_0184	chr1	145668558	145669444	46638	NM_007053	11126	CD160	CD160 molecule
ERα_CHIA-PET_0185	chr1	145694381	145695040	20929	NM_007053	11126	CD160	CD160 molecule
ERα_CHIA-PET_0186	chr1	145726320	145727266	-873	NM_001201326	5174	PDZK1	PDZ domain containing 1
ERα_CHIA-PET_0187	chr1	146994686	146995210	-5249	NR_038423	100289211	LINC00624	long intergenic non-protein coding RNA 624	+
ERα_CHIA-PET_0188	chr1	147006232	147006786	-6762	NM_004326	607	BCL9	B-cell CLL/lymphoma 9
ERα_CHIA-PET_0189	chr1	147141470	147142147	826	NM_016361	51205	ACP6	acid phosphatase 6, lysophosphatidic	+
ERα_CHIA-PET_0190	chr1	147188735	147189691	43501	NM_181703	2702	GJA5	gap junction protein alpha 5	+
ERα_CHIA-PET_0191	chr1	150808476	150808974	-27808	NM_000396	1513	CTSK	cathepsin K		+
ERα_CHIA-PET_0192	chr1	150954003	150954910	-43	NM_003568	8416	ANXA9	annexin A9
ERα_CHIA-PET_0193	chr1	150978087	150978829	815	NM_001163259	55793	FAM63A	family with sequence similarity 63, member A
ERα_CHIA-PET_0194	chr1	150980211	150980838	330	NM_018379	55793	FAM63A	family with sequence similarity 63, member A	+
ERα_CHIA-PET_0195	chr1	151995161	151995686	4669	NR_103561	441908	NBPF18P	neuroblastoma breakpoint family, member 18, pseudogene
ERα_CHIA-PET_0196	chr1	155149494	155150014	2524	NR_046329	80128	TRIM46	tripartite motif containing 46	+
ERα_CHIA-PET_0197	chr1	155161261	155161836	1158	NM_001018017	4582	MUC1	mucin 1, cell surface associated	+
ERα_CHIA-PET_0198	chr1	156751331	156751920	14351	NM_005973	5546	PRCC	papillary renal cell carcinoma (translocation-associated)
ERα_CHIA-PET_0199	chr1	156800752	156801311	-14391	NM_001161444	9047	SH2D2A	SH2 domain containing 2A	+	+
ERα_CHIA-PET_0200	chr1	162104268	162105075	-22226	NR_039798	100616386	MIR4654	microRNA 4654
ERα_CHIA-PET_0201	chr1	162128948	162129889	2521	NR_039798	100616386	MIR4654	microRNA 4654	+
ERα_CHIA-PET_0202	chr1	162137703	162138799	11354	NR_039798	100616386	MIR4654	microRNA 4654
ERα_CHIA-PET_0203	chr1	164676035	164676749	67486	NR_038072	100505795	LOC100505795	uncharacterized LOC100505795
ERα_CHIA-PET_0204	chr1	164685204	164686035	58259	NR_038072	100505795	LOC100505795	uncharacterized LOC100505795	+
ERα_CHIA-PET_0205	chr1	164710263	164710781	33356	NR_038072	100505795	LOC100505795	uncharacterized LOC100505795
ERα_CHIA-PET_0206	chr1	164717370	164718472	25957	NR_038072	100505795	LOC100505795	uncharacterized LOC100505795	+	+
ERα_CHIA-PET_0207	chr1	164726582	164727485	16845	NR_038072	100505795	LOC100505795	uncharacterized LOC100505795	+
ERα_CHIA-PET_0208	chr1	164731083	164731649	12512	NR_038072	100505795	LOC100505795	uncharacterized LOC100505795
ERα_CHIA-PET_0209	chr1	168876397	168877012	120525	NR_024160	79100	LINC00626	long intergenic non-protein coding RNA 626	+
ERα_CHIA-PET_0210	chr1	168908687	168909331	147234	NR_104091	101978719	LINC00970	long intergenic non-protein coding RNA 970
ERα_CHIA-PET_0211	chr1	169486562	169487382	-31764	NM_006996	10560	SLC19A2	solute carrier family 19 (thiamine transporter), member 2
ERα_CHIA-PET_0212	chr1	169498338	169499053	-43487	NM_006996	10560	SLC19A2	solute carrier family 19 (thiamine transporter), member 2		+
ERα_CHIA-PET_0213	chr1	174358033	174358668	-58862	NM_005684	9293	GPR52	G protein-coupled receptor 52
ERα_CHIA-PET_0214	chr1	174935861	174936378	2214	NM_001243764	9910	RABGAP1L	RAB GTPase activating protein 1-like
ERα_CHIA-PET_0215	chr1	177270278	177271098	-50034	NR_126001	102724661	LOC102724661	uncharacterized LOC102724661		+
ERα_CHIA-PET_0216	chr1	177409749	177410689	89497	NR_126001	102724661	LOC102724661	uncharacterized LOC102724661		+
ERα_CHIA-PET_0217	chr1	177417575	177418521	97326	NR_126001	102724661	LOC102724661	uncharacterized LOC102724661	+
ERα_CHIA-PET_0218	chr1	177445529	177446487	125286	NR_126001	102724661	LOC102724661	uncharacterized LOC102724661	+
ERα_CHIA-PET_0219	chr1	177540708	177541561	-128525	NR_110722	101928778	LOC101928778	uncharacterized LOC101928778
ERα_CHIA-PET_0220	chr1	177554526	177555365	-114714	NR_110722	101928778	LOC101928778	uncharacterized LOC101928778		+
ERα_CHIA-PET_0221	chr1	177580070	177580829	-89210	NR_110722	101928778	LOC101928778	uncharacterized LOC101928778
ERα_CHIA-PET_0222	chr1	177587912	177588454	-81476	NR_110722	101928778	LOC101928778	uncharacterized LOC101928778
ERα_CHIA-PET_0223	chr1	177589531	177590362	-79713	NR_110722	101928778	LOC101928778	uncharacterized LOC101928778
ERα_CHIA-PET_0224	chr1	177759457	177760017	90078	NR_110722	101928778	LOC101928778	uncharacterized LOC101928778	+
ERα_CHIA-PET_0225	chr1	177920346	177921200	18277	NM_033127	89866	SEC16B	SEC16 homolog B, endoplasmic reticulum export factor	+
ERα_CHIA-PET_0226	chr1	179835373	179836113	11198	NM_001199260	163590	TOR1AIP2	torsin A interacting protein 2
ERα_CHIA-PET_0227	chr1	179843590	179844472	2910	NM_001199260	163590	TOR1AIP2	torsin A interacting protein 2	+
ERα_CHIA-PET_0228	chr1	179851939	179852748	1166	NM_015602	26092	TOR1AIP1	torsin A interacting protein 1	+
ERα_CHIA-PET_0229	chr1	179899959	179900671	-23593	NM_014810	9857	CEP350	centrosomal protein 350kDa		+
ERα_CHIA-PET_0230	chr1	179943934	179944436	20277	NM_014810	9857	CEP350	centrosomal protein 350kDa
ERα_CHIA-PET_0231	chr1	180049266	180050084	-74293	NM_002826	5768	QSOX1	quiescin Q6 sulfhydryl oxidase 1
ERα_CHIA-PET_0232	chr1	180123456	180124007	-237	NM_002826	5768	QSOX1	quiescin Q6 sulfhydryl oxidase 1	+
ERα_CHIA-PET_0233	chr1	180126696	180127275	3017	NM_001004128	5768	QSOX1	quiescin Q6 sulfhydryl oxidase 1
ERα_CHIA-PET_0234	chr1	180136378	180137682	13062	NM_001004128	5768	QSOX1	quiescin Q6 sulfhydryl oxidase 1
ERα_CHIA-PET_0235	chr1	180197325	180198301	-1620	NM_033343	89884	LHX4	LIM homeobox 4	+	+
ERα_CHIA-PET_0236	chr1	181095782	181096625	38565	NM_016545	51278	IER5	immediate early response 5
ERα_CHIA-PET_0237	chr1	181103847	181104648	-39373	NR_125966	101928973	LOC101928973	uncharacterized LOC101928973	+
ERα_CHIA-PET_0238	chr1	182109876	182110860	-79521	NM_001009992	127665	ZNF648	zinc finger protein 648	+	+
ERα_CHIA-PET_0239	chr1	182213461	182214237	69347	NR_104175	400799	LINC01344	long intergenic non-protein coding RNA 1344		+
ERα_CHIA-PET_0240	chr1	182992692	182993612	557	NM_002293	3915	LAMC1	laminin, gamma 1 (formerly LAMB2)
ERα_CHIA-PET_0241	chr1	183191651	183192577	36940	NM_018891	3918	LAMC2	laminin, gamma 2	+	+
ERα_CHIA-PET_0242	chr1	183574796	183575307	-14995	NM_001127651	4688	NCF2	neutrophil cytosolic factor 2
ERα_CHIA-PET_0243	chr1	186081191	186081911	-183854	NM_001127710	10216	PRG4	proteoglycan 4
ERα_CHIA-PET_0244	chr1	186083743	186084496	-181286	NM_001127710	10216	PRG4	proteoglycan 4
ERα_CHIA-PET_0245	chr1	186121714	186122565	-143266	NM_001127710	10216	PRG4	proteoglycan 4
ERα_CHIA-PET_0246	chr1	188401582	188402198	989130	NR_132374	106144535	LINC01037	long intergenic non-protein coding RNA 1037	+
ERα_CHIA-PET_0247	chr1	188862431	188863519	1450215	NR_132374	106144535	LINC01037	long intergenic non-protein coding RNA 1037
ERα_CHIA-PET_0248	chr1	189709850	189710556	736556	NM_199051	339479	BRINP3	bone morphogenetic protein/retinoic acid inducible neural-specific 3	+
ERα_CHIA-PET_0249	chr1	189743648	189744501	702685	NM_199051	339479	BRINP3	bone morphogenetic protein/retinoic acid inducible neural-specific 3
ERα_CHIA-PET_0250	chr1	193426588	193427494	153166	NR_125789	101929184	LINC01031	long intergenic non-protein coding RNA 1031
ERα_CHIA-PET_0251	chr1	193448217	193449023	174745	NR_125789	101929184	LINC01031	long intergenic non-protein coding RNA 1031	+
ERα_CHIA-PET_0252	chr1	199654220	199654925	-342158	NM_205860	2494	NR5A2	nuclear receptor subfamily 5, group A, member 2
ERα_CHIA-PET_0253	chr1	199887265	199888080	-109058	NM_205860	2494	NR5A2	nuclear receptor subfamily 5, group A, member 2	+
ERα_CHIA-PET_0254	chr1	199963909	199964969	-32291	NM_205860	2494	NR5A2	nuclear receptor subfamily 5, group A, member 2		+
ERα_CHIA-PET_0255	chr1	199985593	199986737	-10565	NM_205860	2494	NR5A2	nuclear receptor subfamily 5, group A, member 2	+
ERα_CHIA-PET_0256	chr1	200059809	200060443	48173	NM_001276464	2494	NR5A2	nuclear receptor subfamily 5, group A, member 2
ERα_CHIA-PET_0257	chr1	200075872	200076695	64330	NM_001276464	2494	NR5A2	nuclear receptor subfamily 5, group A, member 2
ERα_CHIA-PET_0258	chr1	200083436	200084359	71944	NM_001276464	2494	NR5A2	nuclear receptor subfamily 5, group A, member 2
ERα_CHIA-PET_0259	chr1	200087935	200088445	76237	NM_001276464	2494	NR5A2	nuclear receptor subfamily 5, group A, member 2
ERα_CHIA-PET_0260	chr1	200240463	200241049	102164	NR_040064	554279	LINC00862	long intergenic non-protein coding RNA 862	+
ERα_CHIA-PET_0261	chr1	200271001	200271554	71643	NR_040064	554279	LINC00862	long intergenic non-protein coding RNA 862
ERα_CHIA-PET_0262	chr1	200306066	200306979	36398	NR_040064	554279	LINC00862	long intergenic non-protein coding RNA 862
ERα_CHIA-PET_0263	chr1	200398151	200398950	-19364	NM_001281294	23528	ZNF281	zinc finger protein 281	+
ERα_CHIA-PET_0264	chr1	200455918	200456439	-76992	NM_001281294	23528	ZNF281	zinc finger protein 281
ERα_CHIA-PET_0265	chr1	201014314	201014879	-21768	NM_001252103	23046	KIF21B	kinesin family member 21B	+
ERα_CHIA-PET_0266	chr1	201028898	201029683	-36462	NM_001252103	23046	KIF21B	kinesin family member 21B	+
ERα_CHIA-PET_0267	chr1	201125597	201126249	-2240	NM_001288568	252839	TMEM9	transmembrane protein 9
ERα_CHIA-PET_0268	chr1	201138953	201139475	1496	NM_001288564	252839	TMEM9	transmembrane protein 9
ERα_CHIA-PET_0269	chr1	201250897	201251724	-1270	NM_001005337	5317	PKP1	plakophilin 1		+
ERα_CHIA-PET_0270	chr1	201278258	201279199	26148	NM_000299	5317	PKP1	plakophilin 1		+
ERα_CHIA-PET_0271	chr1	201322032	201323125	24250	NM_001001431	7139	TNNT2	troponin T type 2 (cardiac)	+
ERα_CHIA-PET_0272	chr1	201349225	201349995	-2782	NM_001001430	7139	TNNT2	troponin T type 2 (cardiac)	+
ERα_CHIA-PET_0273	chr1	201350238	201350789	-3685	NM_001001430	7139	TNNT2	troponin T type 2 (cardiac)	+
ERα_CHIA-PET_0274	chr1	201464306	201465042	1027	NM_001193572	1465	CSRP1	cysteine and glycine-rich protein 1	+
ERα_CHIA-PET_0275	chr1	201566824	201567643	-50217	NM_020443	89796	NAV1	neuron navigator 1	+
ERα_CHIA-PET_0276	chr1	201683529	201684092	-4826	NR_049823	100847050	MIR5191	microRNA 5191	+
ERα_CHIA-PET_0277	chr1	201991853	201992892	12682	NM_001114309	1999	ELF3	E74-like factor 3 (ets domain transcription factor, epithelial-specific )	+
ERα_CHIA-PET_0278	chr1	202015385	202015885	35945	NM_001114309	1999	ELF3	E74-like factor 3 (ets domain transcription factor, epithelial-specific )
ERα_CHIA-PET_0279	chr1	202025727	202026435	46391	NM_001114309	1999	ELF3	E74-like factor 3 (ets domain transcription factor, epithelial-specific )
ERα_CHIA-PET_0280	chr1	202027171	202027997	47894	NM_001114309	1999	ELF3	E74-like factor 3 (ets domain transcription factor, epithelial-specific )
ERα_CHIA-PET_0281	chr1	202075216	202076067	-16388	NM_004767	9283	GPR37L1	G protein-coupled receptor 37 like 1		+
ERα_CHIA-PET_0282	chr1	202076999	202078057	-14501	NM_004767	9283	GPR37L1	G protein-coupled receptor 37 like 1	+
ERα_CHIA-PET_0283	chr1	202081532	202082699	-9914	NM_004767	9283	GPR37L1	G protein-coupled receptor 37 like 1	+
ERα_CHIA-PET_0284	chr1	202100833	202102420	9597	NM_004767	9283	GPR37L1	G protein-coupled receptor 37 like 1	+
ERα_CHIA-PET_0285	chr1	202168960	202169955	-3448	NM_021636	59352	LGR6	leucine-rich repeat containing G protein-coupled receptor 6
ERα_CHIA-PET_0286	chr1	202194900	202195779	12056	NM_001017404	59352	LGR6	leucine-rich repeat containing G protein-coupled receptor 6	+
ERα_CHIA-PET_0287	chr1	202223168	202224040	40321	NM_001017404	59352	LGR6	leucine-rich repeat containing G protein-coupled receptor 6		+
ERα_CHIA-PET_0288	chr1	202238460	202239501	55697	NM_001017404	59352	LGR6	leucine-rich repeat containing G protein-coupled receptor 6	+
ERα_CHIA-PET_0289	chr1	202304162	202305225	6401	NM_001310326	29089	UBE2T	ubiquitin conjugating enzyme E2T	+
ERα_CHIA-PET_0290	chr1	202501045	202501878	-7781	NM_001197131	4660	PPP1R12B	protein phosphatase 1, regulatory subunit 12B	+	+
ERα_CHIA-PET_0291	chr1	203028144	203029149	26520	NM_002479	4656	MYOG	myogenin (myogenic factor 4)
ERα_CHIA-PET_0292	chr1	203055684	203056704	-1028	NM_002479	4656	MYOG	myogenin (myogenic factor 4)	+
ERα_CHIA-PET_0293	chr1	203058086	203059278	-3516	NM_002479	4656	MYOG	myogenin (myogenic factor 4)	+
ERα_CHIA-PET_0294	chr1	203070626	203071629	-15961	NM_002479	4656	MYOG	myogenin (myogenic factor 4)
ERα_CHIA-PET_0295	chr1	203138356	203139126	6201	NM_004997	4608	MYBPH	myosin binding protein H
ERα_CHIA-PET_0296	chr1	203153786	203154704	1677	NM_001276	1116	CHI3L1	chitinase 3-like 1 (cartilage glycoprotein-39)	+
ERα_CHIA-PET_0297	chr1	204114140	204115031	4049	NR_123739	101929441	LOC101929441	uncharacterized LOC101929441	+
ERα_CHIA-PET_0298	chr1	204130800	204131351	4390	NM_000537	5972	REN	renin	+	+
ERα_CHIA-PET_0299	chr1	204149440	204150325	-14417	NM_000537	5972	REN	renin
ERα_CHIA-PET_0300	chr1	204541974	204543006	56983	NM_002393	4194	MDM4	MDM4, p53 regulator
ERα_CHIA-PET_0301	chr1	204700181	204700787	-45887	NM_201630	10446	LRRN2	leucine rich repeat neuronal 2
ERα_CHIA-PET_0302	chr1	204732470	204733525	-64785	NM_001160332	23114	NFASC	neurofascin
ERα_CHIA-PET_0303	chr1	205505169	205505685	20336	NR_027086	284578	LOC284578	uncharacterized LOC284578
ERα_CHIA-PET_0304	chr1	205554560	205555128	16732	NM_181644	148808	MFSD4	major facilitator superfamily domain containing 4		+
ERα_CHIA-PET_0305	chr1	206864931	206865587	6894	NM_004759	9261	MAPKAPK2	mitogen-activated protein kinase-activated protein kinase 2
ERα_CHIA-PET_0306	chr1	206903907	206904422	41675	NM_000572	3586	IL10	interleukin 10
ERα_CHIA-PET_0307	chr1	207014910	207015944	13205	NM_013371	29949	IL19	interleukin 19
ERα_CHIA-PET_0308	chr1	207016615	207017863	15017	NM_013371	29949	IL19	interleukin 19	+
ERα_CHIA-PET_0309	chr1	207020551	207022033	-17862	NM_018724	50604	IL20	interleukin 20		+
ERα_CHIA-PET_0310	chr1	207037969	207039024	-658	NM_018724	50604	IL20	interleukin 20
ERα_CHIA-PET_0311	chr1	207068418	207069704	-1727	NM_001185156	11009	IL24	interleukin 24
ERα_CHIA-PET_0312	chr1	207071669	207072475	1284	NM_006850	11009	IL24	interleukin 24	+
ERα_CHIA-PET_0313	chr1	207074265	207075262	3975	NM_006850	11009	IL24	interleukin 24		+
ERα_CHIA-PET_0314	chr1	207076633	207077856	6456	NM_006850	11009	IL24	interleukin 24	+
ERα_CHIA-PET_0315	chr1	207082727	207083630	12057	NM_001193338	9214	FCMR	Fc fragment of IgM receptor	+
ERα_CHIA-PET_0316	chr1	207110232	207110825	9283	NM_002644	5284	PIGR	polymeric immunoglobulin receptor	+
ERα_CHIA-PET_0317	chr1	208547616	208548239	-130262	NM_025179	5362	PLXNA2	plexin A2	+
ERα_CHIA-PET_0318	chr1	208649952	208650553	-232587	NM_025179	5362	PLXNA2	plexin A2
ERα_CHIA-PET_0319	chr1	209814790	209815288	9640	NM_001017402	3914	LAMB3	laminin, beta 3	+
ERα_CHIA-PET_0320	chr1	211675522	211676320	-9662	NM_183059	343035	RD3	retinal degeneration 3	+
ERα_CHIA-PET_0321	chr1	211694603	211695515	-28800	NM_183059	343035	RD3	retinal degeneration 3	+	+
ERα_CHIA-PET_0322	chr1	211715140	211715915	36572	NM_021194	7779	SLC30A1	solute carrier family 30 (zinc transporter), member 1		+
ERα_CHIA-PET_0323	chr1	212220185	212221009	-11595	NR_037667	25896	INTS7	integrator complex subunit 7	+
ERα_CHIA-PET_0324	chr1	212251122	212251717	464	NR_036068	100422947	MIR3122	microRNA 3122		+
ERα_CHIA-PET_0325	chr1	212311726	212312461	61138	NR_036068	100422947	MIR3122	microRNA 3122	+
ERα_CHIA-PET_0326	chr1	215598232	215599139	-142050	NM_016121	51133	KCTD3	potassium channel tetramerization domain containing 3	+
ERα_CHIA-PET_0327	chr1	215646703	215647818	-93475	NM_016121	51133	KCTD3	potassium channel tetramerization domain containing 3
ERα_CHIA-PET_0328	chr1	215655114	215656051	-85153	NM_016121	51133	KCTD3	potassium channel tetramerization domain containing 3
ERα_CHIA-PET_0329	chr1	215662803	215663769	-77449	NM_016121	51133	KCTD3	potassium channel tetramerization domain containing 3
ERα_CHIA-PET_0330	chr1	217728063	217728561	76132	NM_001297754	55105	GPATCH2	G-patch domain containing 2
ERα_CHIA-PET_0331	chr1	221132700	221133218	-79477	NR_046901	100873924	HLX-AS1	HLX antisense RNA 1		+
ERα_CHIA-PET_0332	chr1	223322288	223323083	-6061	NM_003268	7100	TLR5	toll-like receptor 5		+
ERα_CHIA-PET_0333	chr1	223617471	223617980	51010	NM_152610	164127	CCDC185	coiled-coil domain containing 185
ERα_CHIA-PET_0334	chr1	223870829	223871458	-17707	NM_001143962	388743	CAPN8	calpain 8
ERα_CHIA-PET_0335	chr1	227515960	227516808	-10558	NM_003607	8476	CDC42BPA	CDC42 binding protein kinase alpha (DMPK-like)	+
ERα_CHIA-PET_0336	chr1	229283797	229284417	26441	NR_039659	100616234	MIR4454	microRNA 4454
ERα_CHIA-PET_0337	chr1	229297126	229297997	12987	NR_039659	100616234	MIR4454	microRNA 4454	+
ERα_CHIA-PET_0338	chr1	229300786	229301354	9478	NR_039659	100616234	MIR4454	microRNA 4454	+
ERα_CHIA-PET_0339	chr1	229357030	229357711	-46822	NR_039659	100616234	MIR4454	microRNA 4454	+
ERα_CHIA-PET_0340	chr1	233817431	233817947	57791	NR_039625	100616390	MIR4427	microRNA 4427
ERα_CHIA-PET_0341	chr1	233850469	233851079	90876	NR_039625	100616390	MIR4427	microRNA 4427
ERα_CHIA-PET_0342	chr1	234688568	234689213	-21365	NR_038426	100506795	LINC01354	long intergenic non-protein coding RNA 1354	+
ERα_CHIA-PET_0343	chr1	234746214	234746933	-1302	NM_182972	359948	IRF2BP2	interferon regulatory factor 2 binding protein 2		+
ERα_CHIA-PET_0344	chr1	234860298	234860870	795	NR_038856	100506810	LINC01132	long intergenic non-protein coding RNA 1132	+	+
ERα_CHIA-PET_0345	chr1	234987524	234988439	111765	NR_125945	101927851	LOC101927851	uncharacterized LOC101927851
ERα_CHIA-PET_0346	chr1	235002775	235003682	96518	NR_125945	101927851	LOC101927851	uncharacterized LOC101927851
ERα_CHIA-PET_0347	chr1	235011530	235012920	87521	NR_125945	101927851	LOC101927851	uncharacterized LOC101927851		+
ERα_CHIA-PET_0348	chr1	235098637	235099584	636	NR_125945	101927851	LOC101927851	uncharacterized LOC101927851	+	+
ERα_CHIA-PET_0349	chr1	235869686	235870206	-55892	NM_001098721	2786	GNG4	guanine nucleotide binding protein (G protein), gamma 4
ERα_CHIA-PET_0350	chr1	240450810	240451565	-189222	NR_128706	100526648	MIR1273E	microRNA 1273e	+
ERα_CHIA-PET_0351	chr1	240598818	240599486	-41257	NR_128706	100526648	MIR1273E	microRNA 1273e
ERα_CHIA-PET_0352	chr1	241870235	241871019	55047	NM_144625	128025	WDR64	WD repeat domain 64
ERα_CHIA-PET_0353	chr1	241871852	241872397	56544	NM_144625	128025	WDR64	WD repeat domain 64
ERα_CHIA-PET_0354	chr1	241964202	241965013	-46886	NM_130398	9156	EXO1	exonuclease 1
ERα_CHIA-PET_0355	chr1	241980125	241981106	-30878	NM_130398	9156	EXO1	exonuclease 1
ERα_CHIA-PET_0356	chr10	135881	136725	-41125	NM_177987	347688	TUBB8	tubulin, beta 8 class VIII		+
ERα_CHIA-PET_0357	chr10	153003	153534	-27137	NM_006624	10771	ZMYND11	zinc finger, MYND-type containing 11	+
ERα_CHIA-PET_0358	chr10	157773	158876	-22081	NM_006624	10771	ZMYND11	zinc finger, MYND-type containing 11	+
ERα_CHIA-PET_0359	chr10	172457	173384	-7485	NM_006624	10771	ZMYND11	zinc finger, MYND-type containing 11	+
ERα_CHIA-PET_0360	chr10	384659	385391	-56999	NR_106988	102465753	MIR7641-2	microRNA 7641-2	+
ERα_CHIA-PET_0361	chr10	407040	408017	-79502	NR_106988	102465753	MIR7641-2	microRNA 7641-2
ERα_CHIA-PET_0362	chr10	419132	419971	-91525	NR_106988	102465753	MIR7641-2	microRNA 7641-2
ERα_CHIA-PET_0363	chr10	482125	482764	-154418	NR_106988	102465753	MIR7641-2	microRNA 7641-2	+
ERα_CHIA-PET_0364	chr10	778220	778758	-42881	NM_014974	22982	DIP2C	disco-interacting protein 2 homolog C		+
ERα_CHIA-PET_0365	chr10	824668	825446	-89449	NM_014974	22982	DIP2C	disco-interacting protein 2 homolog C	+
ERα_CHIA-PET_0366	chr10	959060	959737	18247	NM_015155	23185	LARP4B	La ribonucleoprotein domain family, member 4B
ERα_CHIA-PET_0367	chr10	1016216	1016784	-17849	NM_012341	23560	GTPBP4	GTP binding protein 4
ERα_CHIA-PET_0368	chr10	3291241	3291816	-69359	NR_131187	105376360	LOC105376360	uncharacterized LOC105376360		+
ERα_CHIA-PET_0369	chr10	3331759	3332527	-28744	NR_131187	105376360	LOC105376360	uncharacterized LOC105376360	+	+
ERα_CHIA-PET_0370	chr10	3437943	3438456	77312	NR_131187	105376360	LOC105376360	uncharacterized LOC105376360
ERα_CHIA-PET_0371	chr10	4216164	4216808	69618	NR_108040	100652988	LINC00702	long intergenic non-protein coding RNA 702	+
ERα_CHIA-PET_0372	chr10	4321559	4322150	-35750	NR_108040	100652988	LINC00702	long intergenic non-protein coding RNA 702	+
ERα_CHIA-PET_0373	chr10	5529922	5530948	11098	NM_017422	51806	CALML5	calmodulin-like 5		+
ERα_CHIA-PET_0374	chr10	5538241	5539248	2789	NM_017422	51806	CALML5	calmodulin-like 5
ERα_CHIA-PET_0375	chr10	5586642	5587577	-18900	NR_120496	100132159	CALML3-AS1	CALML3 antisense RNA 1	+
ERα_CHIA-PET_0376	chr10	5664939	5665458	43360	NM_024701	79754	ASB13	ankyrin repeat and SOCS box containing 13
ERα_CHIA-PET_0377	chr10	5693574	5694560	14491	NM_024701	79754	ASB13	ankyrin repeat and SOCS box containing 13	+
ERα_CHIA-PET_0378	chr10	5701553	5702862	6351	NM_024701	79754	ASB13	ankyrin repeat and SOCS box containing 13	+	+
ERα_CHIA-PET_0379	chr10	5726767	5727808	486	NM_017782	54906	FAM208B	family with sequence similarity 208, member B	+
ERα_CHIA-PET_0380	chr10	7987610	7988419	106440	NR_104329	399717	GATA3-AS1	GATA3 antisense RNA 1	+
ERα_CHIA-PET_0381	chr10	8008669	8009516	85362	NR_104329	399717	GATA3-AS1	GATA3 antisense RNA 1	+
ERα_CHIA-PET_0382	chr10	8126544	8127521	30365	NM_001002295	2625	GATA3	GATA binding protein 3
ERα_CHIA-PET_0383	chr10	8169982	8171025	73836	NM_001002295	2625	GATA3	GATA binding protein 3	+	+
ERα_CHIA-PET_0384	chr10	8449131	8449678	-139136	NR_108058	100507143	LINC00708	long intergenic non-protein coding RNA 708
ERα_CHIA-PET_0385	chr10	8586520	8587171	-276577	NR_108058	100507143	LINC00708	long intergenic non-protein coding RNA 708
ERα_CHIA-PET_0386	chr10	8767694	8768656	-171777	NR_131944	105755953	LOC105755953	uncharacterized LOC105755953	+
ERα_CHIA-PET_0387	chr10	8794268	8795076	-145280	NR_131944	105755953	LOC105755953	uncharacterized LOC105755953	+
ERα_CHIA-PET_0388	chr10	8898517	8899610	-40889	NR_131944	105755953	LOC105755953	uncharacterized LOC105755953		+
ERα_CHIA-PET_0389	chr10	8913113	8914192	-26300	NR_131944	105755953	LOC105755953	uncharacterized LOC105755953
ERα_CHIA-PET_0390	chr10	9079543	9080912	140275	NR_131944	105755953	LOC105755953	uncharacterized LOC105755953	+	+
ERα_CHIA-PET_0391	chr10	9220319	9221463	-96685	NR_108039	100507163	LINC00709	long intergenic non-protein coding RNA 709
ERα_CHIA-PET_0392	chr10	9229766	9231365	-87011	NR_108039	100507163	LINC00709	long intergenic non-protein coding RNA 709
ERα_CHIA-PET_0393	chr10	12914390	12915265	128877	NM_031455	83643	CCDC3	coiled-coil domain containing 3	+	+
ERα_CHIA-PET_0394	chr10	12923643	12924389	119688	NM_031455	83643	CCDC3	coiled-coil domain containing 3		+
ERα_CHIA-PET_0395	chr10	17429642	17430261	1016	NR_034129	100128098	ST8SIA6-AS1	ST8SIA6 antisense RNA 1
ERα_CHIA-PET_0396	chr10	17487318	17488198	8496	NM_001004470	338596	ST8SIA6	ST8 alpha-N-acetyl-neuraminide alpha-2,8-sialyltransferase 6	+
ERα_CHIA-PET_0397	chr10	18505823	18506646	-43350	NM_000724	783	CACNB2	calcium channel, voltage-dependent, beta 2 subunit	+
ERα_CHIA-PET_0398	chr10	18522407	18523085	-26838	NM_000724	783	CACNB2	calcium channel, voltage-dependent, beta 2 subunit		+
ERα_CHIA-PET_0399	chr10	19466486	19467327	129206	NM_001142308	340895	MALRD1	MAM and LDL receptor class A domain containing 1	+	+
ERα_CHIA-PET_0400	chr10	19521041	19521911	183776	NM_001142308	340895	MALRD1	MAM and LDL receptor class A domain containing 1	+	+
ERα_CHIA-PET_0401	chr10	21919337	21919967	96078	NM_001195626	8028	MLLT10	myeloid/lymphoid or mixed-lineage leukemia; translocated to, 10	+
ERα_CHIA-PET_0402	chr10	21931823	21932370	108522	NM_001195626	8028	MLLT10	myeloid/lymphoid or mixed-lineage leukemia; translocated to, 10	+
ERα_CHIA-PET_0403	chr10	22103513	22104392	188698	NM_022365	64215	DNAJC1	DnaJ (Hsp40) homolog, subfamily C, member 1		+
ERα_CHIA-PET_0404	chr10	22145313	22145845	147071	NM_022365	64215	DNAJC1	DnaJ (Hsp40) homolog, subfamily C, member 1		+
ERα_CHIA-PET_0405	chr10	22159458	22160254	132794	NM_022365	64215	DNAJC1	DnaJ (Hsp40) homolog, subfamily C, member 1		+
ERα_CHIA-PET_0406	chr10	22872642	22873453	130456	NM_005028	5305	PIP4K2A	phosphatidylinositol-5-phosphate 4-kinase, type II, alpha	+	+
ERα_CHIA-PET_0407	chr10	22921716	22922827	81232	NM_005028	5305	PIP4K2A	phosphatidylinositol-5-phosphate 4-kinase, type II, alpha	+
ERα_CHIA-PET_0408	chr10	22971884	22972916	31103	NM_005028	5305	PIP4K2A	phosphatidylinositol-5-phosphate 4-kinase, type II, alpha		+
ERα_CHIA-PET_0409	chr10	23370102	23370969	-13892	NM_012228	22921	MSRB2	methionine sulfoxide reductase B2		+
ERα_CHIA-PET_0410	chr10	27988499	27989198	-44696	NR_121652	101929202	MKX-AS1	MKX antisense RNA 1
ERα_CHIA-PET_0411	chr10	28009368	28009969	-23876	NR_121652	101929202	MKX-AS1	MKX antisense RNA 1
ERα_CHIA-PET_0412	chr10	28784636	28785607	36162	NR_033805	220906	WAC-AS1	WAC antisense RNA 1 (head to head)	+
ERα_CHIA-PET_0413	chr10	28948898	28949929	-17011	NM_012342	25805	BAMBI	BMP and activin membrane-bound inhibitor	+	+
ERα_CHIA-PET_0414	chr10	28970820	28971870	4921	NM_012342	25805	BAMBI	BMP and activin membrane-bound inhibitor
ERα_CHIA-PET_0415	chr10	28973917	28974822	7945	NM_012342	25805	BAMBI	BMP and activin membrane-bound inhibitor		+
ERα_CHIA-PET_0416	chr10	29189052	29189978	54178	NM_001278522	283080	C10orf126	chromosome 10 open reading frame 126
ERα_CHIA-PET_0417	chr10	29213962	29215069	79178	NM_001278522	283080	C10orf126	chromosome 10 open reading frame 126	+
ERα_CHIA-PET_0418	chr10	29338278	29339227	203415	NM_001278522	283080	C10orf126	chromosome 10 open reading frame 126		+
ERα_CHIA-PET_0419	chr10	29389594	29390645	-187871	NM_032517	84569	LYZL1	lysozyme-like 1
ERα_CHIA-PET_0420	chr10	29393706	29394566	-183854	NM_032517	84569	LYZL1	lysozyme-like 1		+
ERα_CHIA-PET_0421	chr10	29396547	29398607	-180413	NM_032517	84569	LYZL1	lysozyme-like 1	+	+
ERα_CHIA-PET_0422	chr10	29399087	29400040	-178427	NM_032517	84569	LYZL1	lysozyme-like 1	+
ERα_CHIA-PET_0423	chr10	29413459	29414669	-163926	NM_032517	84569	LYZL1	lysozyme-like 1	+	+
ERα_CHIA-PET_0424	chr10	29592207	29592994	14610	NM_032517	84569	LYZL1	lysozyme-like 1	+
ERα_CHIA-PET_0425	chr10	29790714	29791345	42997	NR_030335	693189	MIR604	microRNA 604		+
ERα_CHIA-PET_0426	chr10	29911210	29911883	12355	NM_021738	6840	SVIL	supervillin
ERα_CHIA-PET_0427	chr10	29918991	29919942	4435	NM_021738	6840	SVIL	supervillin
ERα_CHIA-PET_0428	chr10	30100650	30101674	-76432	NM_003174	6840	SVIL	supervillin
ERα_CHIA-PET_0429	chr10	30782924	30783739	60381	NM_001244134	1326	MAP3K8	mitogen-activated protein kinase kinase kinase 8
ERα_CHIA-PET_0430	chr10	30811638	30812293	89015	NM_001244134	1326	MAP3K8	mitogen-activated protein kinase kinase kinase 8	+
ERα_CHIA-PET_0431	chr10	30825239	30826178	92939	NM_183058	119180	LYZL2	lysozyme-like 2
ERα_CHIA-PET_0432	chr10	30831223	30831792	87140	NM_183058	119180	LYZL2	lysozyme-like 2	+
ERα_CHIA-PET_0433	chr10	30867923	30868702	50335	NM_183058	119180	LYZL2	lysozyme-like 2
ERα_CHIA-PET_0434	chr10	30970895	30971528	-9992	NR_036438	645954	SVILP1	supervillin pseudogene 1	+
ERα_CHIA-PET_0435	chr10	42529284	42529919	333892	NR_024380	441666	LOC441666	zinc finger protein 91 pseudogene
ERα_CHIA-PET_0436	chr10	43476362	43477727	-89	NR_126352	104266963	LINC01264	long intergenic non-protein coding RNA 1264	+
ERα_CHIA-PET_0437	chr10	43521559	43522630	29083	NR_049836	100847014	MIR5100	microRNA 5100
ERα_CHIA-PET_0438	chr10	43533128	43534073	-38917	NM_020975	5979	RET	ret proto-oncogene	+
ERα_CHIA-PET_0439	chr10	43539906	43540728	-32200	NM_020975	5979	RET	ret proto-oncogene
ERα_CHIA-PET_0440	chr10	43563849	43564568	-8309	NM_020975	5979	RET	ret proto-oncogene		+
ERα_CHIA-PET_0441	chr10	43577258	43578049	5136	NM_020630	5979	RET	ret proto-oncogene
ERα_CHIA-PET_0442	chr10	43605825	43606953	-27504	NM_018590	55454	CSGALNACT2	chondroitin sulfate N-acetylgalactosaminyltransferase 2	+
ERα_CHIA-PET_0443	chr10	43858744	43859363	-8039	NM_001184963	53828	FXYD4	FXYD domain containing ion transport regulator 4	+
ERα_CHIA-PET_0444	chr10	43870792	43871751	4179	NM_173160	53828	FXYD4	FXYD domain containing ion transport regulator 4	+
ERα_CHIA-PET_0445	chr10	44273878	44274692	11580	NR_002726	10151	HNRNPA3P1	heterogeneous nuclear ribonucleoprotein A3 pseudogene 1	+
ERα_CHIA-PET_0446	chr10	44668404	44669705	-119144	NM_001258000	100130539	C10orf142	chromosome 10 open reading frame 142	+	+
ERα_CHIA-PET_0447	chr10	44732000	44733019	-55689	NM_001258000	100130539	C10orf142	chromosome 10 open reading frame 142
ERα_CHIA-PET_0448	chr10	44739466	44740027	-48452	NM_001258000	100130539	C10orf142	chromosome 10 open reading frame 142
ERα_CHIA-PET_0449	chr10	44740175	44741126	-47548	NM_001258000	100130539	C10orf142	chromosome 10 open reading frame 142
ERα_CHIA-PET_0450	chr10	44754337	44754835	-33612	NM_001258000	100130539	C10orf142	chromosome 10 open reading frame 142	+	+
ERα_CHIA-PET_0451	chr10	44796450	44797191	8622	NM_001258000	100130539	C10orf142	chromosome 10 open reading frame 142
ERα_CHIA-PET_0452	chr10	44846344	44846893	33927	NM_001277990	6387	CXCL12	chemokine (C-X-C motif) ligand 12
ERα_CHIA-PET_0453	chr10	44880004	44880533	277	NM_001277990	6387	CXCL12	chemokine (C-X-C motif) ligand 12
ERα_CHIA-PET_0454	chr10	49804969	49805487	7948	NM_021226	58504	ARHGAP22	Rho GTPase activating protein 22	+	+
ERα_CHIA-PET_0455	chr10	50012641	50013621	109149	NM_001006939	474354	LRRC18	leucine rich repeat containing 18		+
ERα_CHIA-PET_0456	chr10	50022859	50023759	98971	NM_001006939	474354	LRRC18	leucine rich repeat containing 18		+
ERα_CHIA-PET_0457	chr10	51547086	51548033	-1994	NM_002443	4477	MSMB	microseminoprotein, beta-	+
ERα_CHIA-PET_0458	chr10	51561634	51562558	-3012	NM_001145261	8031	NCOA4	nuclear receptor coactivator 4	+	+
ERα_CHIA-PET_0459	chr10	51572072	51572901	122	NM_005437	8031	NCOA4	nuclear receptor coactivator 4
ERα_CHIA-PET_0460	chr10	52233476	52234062	149968	NM_147156	259230	SGMS1	sphingomyelin synthase 1
ERα_CHIA-PET_0461	chr10	52261197	52261976	122151	NM_147156	259230	SGMS1	sphingomyelin synthase 1		+
ERα_CHIA-PET_0462	chr10	52368809	52369604	14531	NM_147156	259230	SGMS1	sphingomyelin synthase 1	+
ERα_CHIA-PET_0463	chr10	58424563	58425526	-304010	NM_032997	11130	ZWINT	ZW10 interacting kinetochore protein	+
ERα_CHIA-PET_0464	chr10	58543083	58543976	-422495	NM_032997	11130	ZWINT	ZW10 interacting kinetochore protein	+
ERα_CHIA-PET_0465	chr10	61004830	61005711	68043	NM_001143774	84457	PHYHIPL	phytanoyl-CoA 2-hydroxylase interacting protein-like
ERα_CHIA-PET_0466	chr10	61082630	61083618	39228	NM_001166698	220965	FAM13C	family with sequence similarity 13, member C	+	+
ERα_CHIA-PET_0467	chr10	61109764	61110677	12132	NM_001166698	220965	FAM13C	family with sequence similarity 13, member C
ERα_CHIA-PET_0468	chr10	61155735	61156298	-33355	NM_001143773	220965	FAM13C	family with sequence similarity 13, member C
ERα_CHIA-PET_0469	chr10	61594825	61595768	71118	NM_005436	8030	CCDC6	coiled-coil domain containing 6	+
ERα_CHIA-PET_0470	chr10	61791001	61791997	-70828	NR_024340	283025	LINC01553	long intergenic non-protein coding RNA 1553		+
ERα_CHIA-PET_0471	chr10	62576531	62577456	38781	NM_001786	983	CDK1	cyclin-dependent kinase 1		+
ERα_CHIA-PET_0472	chr10	62607921	62609057	70277	NM_001786	983	CDK1	cyclin-dependent kinase 1	+	+
ERα_CHIA-PET_0473	chr10	62625172	62625695	78600	NM_001242359	9886	RHOBTB1	Rho-related BTB domain containing 1		+
ERα_CHIA-PET_0474	chr10	62702245	62703298	1262	NM_001242359	9886	RHOBTB1	Rho-related BTB domain containing 1
ERα_CHIA-PET_0475	chr10	63031068	63031834	-180946	NR_120643	101928781	TMEM26-AS1	TMEM26 antisense RNA 1		+
ERα_CHIA-PET_0476	chr10	63158275	63158784	-53868	NR_120643	101928781	TMEM26-AS1	TMEM26 antisense RNA 1	+
ERα_CHIA-PET_0477	chr10	63169406	63170273	-42558	NR_120643	101928781	TMEM26-AS1	TMEM26 antisense RNA 1	+
ERα_CHIA-PET_0478	chr10	63808251	63809177	-256	NM_001244638	84159	ARID5B	AT rich interactive domain 5B (MRF1-like)
ERα_CHIA-PET_0479	chr10	63849120	63850146	40663	NM_001244638	84159	ARID5B	AT rich interactive domain 5B (MRF1-like)	+
ERα_CHIA-PET_0480	chr10	65390040	65391338	109566	NM_001001330	221035	REEP3	receptor accessory protein 3
ERα_CHIA-PET_0481	chr10	65406041	65406912	125353	NM_001001330	221035	REEP3	receptor accessory protein 3	+
ERα_CHIA-PET_0482	chr10	65431193	65431710	150328	NM_001001330	221035	REEP3	receptor accessory protein 3		+
ERα_CHIA-PET_0483	chr10	65471525	65473043	191161	NM_001001330	221035	REEP3	receptor accessory protein 3	+	+
ERα_CHIA-PET_0484	chr10	70973147	70974170	-6401	NM_025130	80201	HKDC1	hexokinase domain containing 1	+	+
ERα_CHIA-PET_0485	chr10	71029224	71029945	-172	NM_033498	3098	HK1	hexokinase 1	+
ERα_CHIA-PET_0486	chr10	71079143	71079663	800	NM_000188	3098	HK1	hexokinase 1	+
ERα_CHIA-PET_0487	chr10	71199068	71199843	-11771	NM_012339	23555	TSPAN15	tetraspanin 15	+
ERα_CHIA-PET_0488	chr10	71219498	71220154	8600	NM_012339	23555	TSPAN15	tetraspanin 15
ERα_CHIA-PET_0489	chr10	71224582	71225182	13656	NM_012339	23555	TSPAN15	tetraspanin 15	+
ERα_CHIA-PET_0490	chr10	71228391	71229109	17524	NM_012339	23555	TSPAN15	tetraspanin 15
ERα_CHIA-PET_0491	chr10	71840862	71841527	28837	NM_018649	55506	H2AFY2	H2A histone family, member Y2	+
ERα_CHIA-PET_0492	chr10	71906193	71906918	-59	NR_073592	219743	TYSND1	trypsin domain containing 1	+
ERα_CHIA-PET_0493	chr10	74004177	74004828	-27610	NR_045564	51008	ASCC1	activating signal cointegrator 1 complex subunit 1		+
ERα_CHIA-PET_0494	chr10	74091027	74091767	23510	NM_017626	54788	DNAJB12	DnaJ (Hsp40) homolog, subfamily B, member 12
ERα_CHIA-PET_0495	chr10	75578988	75579503	-7656	NM_003635	8509	NDST2	N-deacetylase/N-sulfotransferase (heparan glucosaminyl) 2
ERα_CHIA-PET_0496	chr10	75725563	75726063	-32059	NM_003373	7414	VCL	vinculin	+
ERα_CHIA-PET_0497	chr10	76502818	76503752	-82886	NM_001256468	23522	KAT6B	K(lysine) acetyltransferase 6B
ERα_CHIA-PET_0498	chr10	76581159	76582069	-4557	NM_001256468	23522	KAT6B	K(lysine) acetyltransferase 6B
ERα_CHIA-PET_0499	chr10	76659389	76659941	73494	NM_001256469	23522	KAT6B	K(lysine) acetyltransferase 6B
ERα_CHIA-PET_0500	chr10	76660869	76661733	75130	NM_001256469	23522	KAT6B	K(lysine) acetyltransferase 6B
ERα_CHIA-PET_0501	chr10	77005249	77006266	-9987	NM_144589	118881	COMTD1	catechol-O-methyltransferase domain containing 1
ERα_CHIA-PET_0502	chr10	77022241	77022812	-26756	NM_144589	118881	COMTD1	catechol-O-methyltransferase domain containing 1
ERα_CHIA-PET_0503	chr10	79047314	79048108	-62919	NR_126365	101929286	KCNMA1-AS3	KCNMA1 antisense RNA 3
ERα_CHIA-PET_0504	chr10	79169520	79170613	59436	NR_126365	101929286	KCNMA1-AS3	KCNMA1 antisense RNA 3		+
ERα_CHIA-PET_0505	chr10	79190847	79191454	80520	NR_126365	101929286	KCNMA1-AS3	KCNMA1 antisense RNA 3
ERα_CHIA-PET_0506	chr10	79239720	79240331	129395	NR_126365	101929286	KCNMA1-AS3	KCNMA1 antisense RNA 3	+
ERα_CHIA-PET_0507	chr10	79245548	79246268	135278	NR_126365	101929286	KCNMA1-AS3	KCNMA1 antisense RNA 3		+
ERα_CHIA-PET_0508	chr10	79341394	79342996	55382	NM_001271521	3778	KCNMA1	potassium channel, calcium activated large conductance subfamily M alpha, member 1
ERα_CHIA-PET_0509	chr10	79631815	79632753	54064	NM_004747	9231	DLG5	discs, large homolog 5 (Drosophila)	+	+
ERα_CHIA-PET_0510	chr10	79641334	79642128	44617	NM_004747	9231	DLG5	discs, large homolog 5 (Drosophila)
ERα_CHIA-PET_0511	chr10	79647072	79647876	38874	NM_004747	9231	DLG5	discs, large homolog 5 (Drosophila)
ERα_CHIA-PET_0512	chr10	79732055	79732588	45751	NR_024585	100128292	DLG5-AS1	DLG5 antisense RNA 1	+
ERα_CHIA-PET_0513	chr10	80016059	80016709	8002	NR_038985	100132987	LINC00856	long intergenic non-protein coding RNA 856
ERα_CHIA-PET_0514	chr10	80061585	80062099	34757	NR_073447	414243	LINC00595	long intergenic non-protein coding RNA 595
ERα_CHIA-PET_0515	chr10	80651729	80652662	175010	NR_024431	283050	ZMIZ1-AS1	ZMIZ1 antisense RNA 1	+	+
ERα_CHIA-PET_0516	chr10	80671482	80672070	155429	NR_024431	283050	ZMIZ1-AS1	ZMIZ1 antisense RNA 1		+
ERα_CHIA-PET_0517	chr10	80887918	80889027	59680	NM_020338	57178	ZMIZ1	zinc finger, MIZ-type containing 1	+	+
ERα_CHIA-PET_0518	chr10	80909726	80910552	81347	NM_020338	57178	ZMIZ1	zinc finger, MIZ-type containing 1	+
ERα_CHIA-PET_0519	chr10	80917865	80918867	89574	NM_020338	57178	ZMIZ1	zinc finger, MIZ-type containing 1	+
ERα_CHIA-PET_0520	chr10	80922158	80923252	93913	NM_020338	57178	ZMIZ1	zinc finger, MIZ-type containing 1
ERα_CHIA-PET_0521	chr10	82040684	82041580	8302	NM_000429	4143	MAT1A	methionine adenosyltransferase I, alpha
ERα_CHIA-PET_0522	chr10	82050575	82051298	-1502	NM_000429	4143	MAT1A	methionine adenosyltransferase I, alpha	+
ERα_CHIA-PET_0523	chr10	82188978	82189702	15765	NM_001243778	84293	FAM213A	family with sequence similarity 213, member A
ERα_CHIA-PET_0524	chr10	82201295	82202248	-12267	NM_001128309	81619	TSPAN14	tetraspanin 14	+	+
ERα_CHIA-PET_0525	chr10	87876632	87877306	147576	NR_029907	442911	MIR346	microRNA 346
ERα_CHIA-PET_0526	chr10	88407179	88407820	-6815	NM_001030015	94233	OPN4	opsin 4	+
ERα_CHIA-PET_0527	chr10	88442162	88442992	14151	NM_001171611	11155	LDB3	LIM domain binding 3	+	+
ERα_CHIA-PET_0528	chr10	88475545	88476176	-40536	NM_004329	657	BMPR1A	bone morphogenetic protein receptor type IA
ERα_CHIA-PET_0529	chr10	88513237	88513795	-2880	NM_004329	657	BMPR1A	bone morphogenetic protein receptor type IA	+
ERα_CHIA-PET_0530	chr10	88515113	88515849	-915	NM_004329	657	BMPR1A	bone morphogenetic protein receptor type IA
ERα_CHIA-PET_0531	chr10	89867903	89868420	244966	NM_000314	5728	PTEN	phosphatase and tensin homolog
ERα_CHIA-PET_0532	chr10	93120686	93121296	-49051	NM_173497	143279	HECTD2	HECT domain containing E3 ubiquitin protein ligase 2	+
ERα_CHIA-PET_0533	chr10	94650714	94651345	42804	NM_019053	54536	EXOC6	exocyst complex component 6	+
ERα_CHIA-PET_0534	chr10	95194508	95195569	47036	NM_133337	26509	MYOF	myoferlin	+
ERα_CHIA-PET_0535	chr10	95205123	95205679	36673	NM_133337	26509	MYOF	myoferlin
ERα_CHIA-PET_0536	chr10	95225211	95226392	16273	NM_133337	26509	MYOF	myoferlin	+
ERα_CHIA-PET_0537	chr10	95330501	95331310	4483	NM_001195755	338557	FFAR4	free fatty acid receptor 4	+
ERα_CHIA-PET_0538	chr10	96977706	96978224	24008	NM_207321	142827	ACSM6	acyl-CoA synthetase medium-chain family member 6
ERα_CHIA-PET_0539	chr10	97024057	97024569	26592	NM_020992	9124	PDLIM1	PDZ and LIM domain 1
ERα_CHIA-PET_0540	chr10	97033127	97033753	17465	NM_020992	9124	PDLIM1	PDZ and LIM domain 1
ERα_CHIA-PET_0541	chr10	99331114	99332069	-607	NM_020349	26287	ANKRD2	ankyrin repeat domain 2 (stretch responsive muscle)	+	+
ERα_CHIA-PET_0542	chr10	99339740	99340684	-3890	NM_138413	112817	HOGA1	4-hydroxy-2-oxoglutarate aldolase 1	+	+
ERα_CHIA-PET_0543	chr10	99344718	99345483	998	NM_001134670	112817	HOGA1	4-hydroxy-2-oxoglutarate aldolase 1
ERα_CHIA-PET_0544	chr10	100061333	100062167	-33743	NM_032211	84171	LOXL4	lysyl oxidase-like 4
ERα_CHIA-PET_0545	chr10	100073852	100074961	-46399	NM_032211	84171	LOXL4	lysyl oxidase-like 4	+
ERα_CHIA-PET_0546	chr10	102588773	102589718	-83081	NM_018121	55719	SLF2	SMC5-SMC6 complex localization factor 2
ERα_CHIA-PET_0547	chr10	102642818	102643580	-29127	NM_018121	55719	SLF2	SMC5-SMC6 complex localization factor 2
ERα_CHIA-PET_0548	chr10	103391369	103391953	-30407	NR_036115	100423033	MIR3158-2	microRNA 3158-2	+
ERα_CHIA-PET_0549	chr10	103450865	103451650	3486	NM_022039	6468	FBXW4	F-box and WD repeat domain containing 4
ERα_CHIA-PET_0550	chr10	104885478	104886147	67251	NM_001134373	22978	NT5C2	5'-nucleotidase, cytosolic II
ERα_CHIA-PET_0551	chr10	105000930	105001848	-4255	NM_001143909	729020	RPEL1	ribulose-5-phosphate-3-epimerase-like 1
ERα_CHIA-PET_0552	chr10	105649565	105650370	28078	NM_024928	79991	OBFC1	oligonucleotide/oligosaccharide-binding fold containing 1	+
ERα_CHIA-PET_0553	chr10	105691006	105691757	-13336	NM_024928	79991	OBFC1	oligonucleotide/oligosaccharide-binding fold containing 1		+
ERα_CHIA-PET_0554	chr10	105700564	105701388	-22931	NM_024928	79991	OBFC1	oligonucleotide/oligosaccharide-binding fold containing 1	+
ERα_CHIA-PET_0555	chr10	106240327	106241011	-636	NR_120624	101927523	LOC101927523	uncharacterized LOC101927523	+
ERα_CHIA-PET_0556	chr10	107527041	107527540	52801	NR_120625	101927549	LOC101927549	uncharacterized LOC101927549
ERα_CHIA-PET_0557	chr10	112549261	112550080	80992	NR_026932	282997	PDCD4-AS1	PDCD4 antisense RNA 1	+	+
ERα_CHIA-PET_0558	chr10	112569686	112570585	60527	NR_026932	282997	PDCD4-AS1	PDCD4 antisense RNA 1
ERα_CHIA-PET_0559	chr10	112582486	112583040	47899	NR_026932	282997	PDCD4-AS1	PDCD4 antisense RNA 1	+
ERα_CHIA-PET_0560	chr10	112867289	112868074	30891	NM_000681	150	ADRA2A	adrenoceptor alpha 2A	+
ERα_CHIA-PET_0561	chr10	113150095	113150654	313584	NM_000681	150	ADRA2A	adrenoceptor alpha 2A	+
ERα_CHIA-PET_0562	chr10	114515356	114515964	-67595	NR_120684	103344931	LOC103344931	uncharacterized LOC103344931
ERα_CHIA-PET_0563	chr10	114538175	114538696	-44820	NR_120684	103344931	LOC103344931	uncharacterized LOC103344931	+
ERα_CHIA-PET_0564	chr10	115333423	115334308	21087	NM_004132	3026	HABP2	hyaluronan binding protein 2	+
ERα_CHIA-PET_0565	chr10	115438239	115439327	-138	NM_001267056	840	CASP7	caspase 7	+	+
ERα_CHIA-PET_0566	chr10	115681295	115682438	67475	NM_198514	374354	NHLRC2	NHL repeat containing 2	+
ERα_CHIA-PET_0567	chr10	115686736	115687911	72932	NM_198514	374354	NHLRC2	NHL repeat containing 2		+
ERα_CHIA-PET_0568	chr10	115698357	115699179	84377	NM_198514	374354	NHLRC2	NHL repeat containing 2		+
ERα_CHIA-PET_0569	chr10	115718089	115719372	-85076	NM_000684	153	ADRB1	adrenoceptor beta 1	+	+
ERα_CHIA-PET_0570	chr10	115726388	115726935	-77145	NM_000684	153	ADRB1	adrenoceptor beta 1
ERα_CHIA-PET_0571	chr10	115739425	115740192	-63998	NM_000684	153	ADRB1	adrenoceptor beta 1	+	+
ERα_CHIA-PET_0572	chr10	115742174	115743470	-60984	NM_000684	153	ADRB1	adrenoceptor beta 1	+	+
ERα_CHIA-PET_0573	chr10	115816501	115817488	13188	NM_000684	153	ADRB1	adrenoceptor beta 1	+
ERα_CHIA-PET_0574	chr10	115822425	115823140	18976	NM_000684	153	ADRB1	adrenoceptor beta 1
ERα_CHIA-PET_0575	chr10	115998681	115999438	46	NM_001272046	340706	VWA2	von Willebrand factor A domain containing 2	+
ERα_CHIA-PET_0576	chr10	116109271	116110038	54883	NM_001001936	84632	AFAP1L2	actin filament associated protein 1-like 2	+
ERα_CHIA-PET_0577	chr10	117191640	117193198	339295	NM_001276282	26033	ATRNL1	attractin-like 1	+
ERα_CHIA-PET_0578	chr10	117412732	117413781	560132	NM_001276282	26033	ATRNL1	attractin-like 1
ERα_CHIA-PET_0579	chr10	117423891	117424920	571281	NM_001276282	26033	ATRNL1	attractin-like 1	+
ERα_CHIA-PET_0580	chr10	117451536	117452432	579835	NM_145793	2674	GFRA1	GDNF family receptor alpha 1
ERα_CHIA-PET_0581	chr10	117467798	117468687	563577	NM_145793	2674	GFRA1	GDNF family receptor alpha 1	+
ERα_CHIA-PET_0582	chr10	117469439	117470056	562072	NM_145793	2674	GFRA1	GDNF family receptor alpha 1
ERα_CHIA-PET_0583	chr10	117639296	117640065	392139	NM_145793	2674	GFRA1	GDNF family receptor alpha 1	+
ERα_CHIA-PET_0584	chr10	117679623	117680263	351876	NM_145793	2674	GFRA1	GDNF family receptor alpha 1	+
ERα_CHIA-PET_0585	chr10	117757389	117758382	273934	NM_145793	2674	GFRA1	GDNF family receptor alpha 1	+
ERα_CHIA-PET_0586	chr10	117839862	117840726	191525	NM_145793	2674	GFRA1	GDNF family receptor alpha 1	+	+
ERα_CHIA-PET_0587	chr10	117902729	117903483	128713	NM_145793	2674	GFRA1	GDNF family receptor alpha 1	+
ERα_CHIA-PET_0588	chr10	118030269	118031114	1128	NM_145793	2674	GFRA1	GDNF family receptor alpha 1	+
ERα_CHIA-PET_0589	chr10	120116203	120116822	-108	NR_108045	100506126	LINC00867	long intergenic non-protein coding RNA 867
ERα_CHIA-PET_0590	chr10	120140958	120141870	24794	NR_108045	100506126	LINC00867	long intergenic non-protein coding RNA 867
ERα_CHIA-PET_0591	chr10	120151298	120151902	34980	NR_108045	100506126	LINC00867	long intergenic non-protein coding RNA 867	+	+
ERα_CHIA-PET_0592	chr10	121423253	121424227	12858	NM_004281	9531	BAG3	BCL2-associated athanogene 3		+
ERα_CHIA-PET_0593	chr10	121448608	121449191	-36660	NM_014937	22876	INPP5F	inositol polyphosphate-5-phosphatase F	+
ERα_CHIA-PET_0594	chr10	122690826	122691707	-80575	NR_033850	283089	WDR11-AS1	WDR11 antisense RNA 1	+	+
ERα_CHIA-PET_0595	chr10	123029618	123030554	323395	NM_001144913	2263	FGFR2	fibroblast growth factor receptor 2	+
ERα_CHIA-PET_0596	chr10	123125795	123126363	227402	NM_001144913	2263	FGFR2	fibroblast growth factor receptor 2	+	+
ERα_CHIA-PET_0597	chr10	123269501	123270340	83561	NM_001144913	2263	FGFR2	fibroblast growth factor receptor 2
ERα_CHIA-PET_0598	chr10	123313050	123313991	39961	NM_001144913	2263	FGFR2	fibroblast growth factor receptor 2
ERα_CHIA-PET_0599	chr10	123315674	123316484	37402	NM_001144913	2263	FGFR2	fibroblast growth factor receptor 2
ERα_CHIA-PET_0600	chr10	125480818	125482118	55597	NM_153442	2849	GPR26	G protein-coupled receptor 26	+
ERα_CHIA-PET_0601	chr10	125503160	125504084	77751	NM_153442	2849	GPR26	G protein-coupled receptor 26	+	+
ERα_CHIA-PET_0602	chr10	125510506	125511250	85007	NM_153442	2849	GPR26	G protein-coupled receptor 26
ERα_CHIA-PET_0603	chr10	125558280	125559264	92728	NM_198148	119587	CPXM2	carboxypeptidase X (M14 family), member 2
ERα_CHIA-PET_0604	chr10	126052299	126052797	54997	NM_001171814	4942	OAT	ornithine aminotransferase	+
ERα_CHIA-PET_0605	chr10	126812252	126812989	34764	NM_001290215	1488	CTBP2	C-terminal binding protein 2		+
ERα_CHIA-PET_0606	chr10	127203199	127203996	-59343	NR_023362	100169752	TEX36-AS1	TEX36 antisense RNA 1
ERα_CHIA-PET_0607	chr10	127231906	127233060	-30457	NR_023362	100169752	TEX36-AS1	TEX36 antisense RNA 1
ERα_CHIA-PET_0608	chr10	127273372	127274078	10785	NR_023362	100169752	TEX36-AS1	TEX36 antisense RNA 1
ERα_CHIA-PET_0609	chr10	127312986	127315064	51085	NR_023362	100169752	TEX36-AS1	TEX36 antisense RNA 1	+	+
ERα_CHIA-PET_0610	chr10	127322484	127323439	48752	NM_001128202	387718	TEX36	testis expressed 36
ERα_CHIA-PET_0611	chr10	127377757	127378491	6312	NR_033848	283038	LOC283038	uncharacterized LOC283038	+
ERα_CHIA-PET_0612	chr10	127378971	127379913	7630	NR_033848	283038	LOC283038	uncharacterized LOC283038	+	+
ERα_CHIA-PET_0613	chr10	127389784	127390716	17812	NR_033847	399821	FLJ37035	uncharacterized LOC399821	+
ERα_CHIA-PET_0614	chr10	127864180	127865094	-202795	NR_102707	101410540	FANK1-AS1	FANK1 antisense RNA 1	+
ERα_CHIA-PET_0615	chr10	128197381	128198169	12235	NM_001004298	118611	C10orf90	chromosome 10 open reading frame 90	+
ERα_CHIA-PET_0616	chr10	128232024	128232846	-22425	NM_001004298	118611	C10orf90	chromosome 10 open reading frame 90	+
ERα_CHIA-PET_0617	chr10	128330948	128331869	-121398	NM_001004298	118611	C10orf90	chromosome 10 open reading frame 90	+	+
ERα_CHIA-PET_0618	chr10	128352583	128353354	-142958	NM_001004298	118611	C10orf90	chromosome 10 open reading frame 90	+
ERα_CHIA-PET_0619	chr10	128354525	128355133	-144819	NM_001004298	118611	C10orf90	chromosome 10 open reading frame 90
ERα_CHIA-PET_0620	chr10	128394333	128395131	-184722	NM_001004298	118611	C10orf90	chromosome 10 open reading frame 90	+	+
ERα_CHIA-PET_0621	chr10	128606955	128607588	13293	NM_001290223	1793	DOCK1	dedicator of cytokinesis 1	+	+
ERα_CHIA-PET_0622	chr10	130834949	130835821	-430063	NM_002412	4255	MGMT	O-6-methylguanine-DNA methyltransferase
ERα_CHIA-PET_0623	chr10	130967129	130968005	-297881	NM_002412	4255	MGMT	O-6-methylguanine-DNA methyltransferase		+
ERα_CHIA-PET_0624	chr10	131082301	131083136	-182730	NM_002412	4255	MGMT	O-6-methylguanine-DNA methyltransferase
ERα_CHIA-PET_0625	chr10	132897129	132897964	4065	NR_120623	101927489	TCERG1L-AS1	TCERG1L antisense RNA 1
ERα_CHIA-PET_0626	chr10	132909470	132910450	16479	NR_120623	101927489	TCERG1L-AS1	TCERG1L antisense RNA 1	+	+
ERα_CHIA-PET_0627	chr10	132924718	132925620	31688	NR_120623	101927489	TCERG1L-AS1	TCERG1L antisense RNA 1	+
ERα_CHIA-PET_0628	chr10	134074101	134074709	47072	NM_173575	282974	STK32C	serine/threonine kinase 32C	+
ERα_CHIA-PET_0629	chr10	134293537	134294063	35086	NM_173541	170393	C10orf91	chromosome 10 open reading frame 91	+
ERα_CHIA-PET_0630	chr10	134330000	134330909	-20899	NM_005539	3632	INPP5A	inositol polyphosphate-5-phosphatase A
ERα_CHIA-PET_0631	chr10	134352650	134353498	1721	NM_005539	3632	INPP5A	inositol polyphosphate-5-phosphatase A	+
ERα_CHIA-PET_0632	chr10	134362839	134363702	11917	NM_005539	3632	INPP5A	inositol polyphosphate-5-phosphatase A	+
ERα_CHIA-PET_0633	chr10	134388266	134389084	37322	NM_005539	3632	INPP5A	inositol polyphosphate-5-phosphatase A		+
ERα_CHIA-PET_0634	chr11	1506940	1507775	652	NM_001172223	81532	MOB2	MOB kinase activator 2		+
ERα_CHIA-PET_0635	chr11	1515787	1516574	-8171	NM_001172223	81532	MOB2	MOB kinase activator 2
ERα_CHIA-PET_0636	chr11	1671185	1672360	-15057	NR_026643	387742	FAM99A	family with sequence similarity 99, member A (non-protein coding)
ERα_CHIA-PET_0637	chr11	1714670	1715180	-3500	NM_001012416	440023	KRTAP5-6	keratin associated protein 5-6		+
ERα_CHIA-PET_0638	chr11	1790445	1790995	-5498	NM_001909	1509	CTSD	cathepsin D
ERα_CHIA-PET_0639	chr11	1791849	1792502	-6953	NM_001909	1509	CTSD	cathepsin D	+	+
ERα_CHIA-PET_0640	chr11	1793317	1794466	-8669	NM_001909	1509	CTSD	cathepsin D	+
ERα_CHIA-PET_0641	chr11	1803810	1804361	-18863	NM_001909	1509	CTSD	cathepsin D		+
ERα_CHIA-PET_0642	chr11	1817232	1818487	-32637	NM_001909	1509	CTSD	cathepsin D
ERα_CHIA-PET_0643	chr11	1849247	1850630	-5602	NM_001290333	90019	SYT8	synaptotagmin VIII	+	+
ERα_CHIA-PET_0644	chr11	1851792	1852940	-3174	NM_001290333	90019	SYT8	synaptotagmin VIII	+
ERα_CHIA-PET_0645	chr11	2181299	2181948	816	NM_001185097	3630	INS	insulin
ERα_CHIA-PET_0646	chr11	2186317	2187108	-4273	NM_001291897	3630	INS	insulin	+
ERα_CHIA-PET_0647	chr11	2189740	2191379	2476	NM_199293	7054	TH	tyrosine hydroxylase	+
ERα_CHIA-PET_0648	chr11	2214136	2215338	20444	NR_039834	100616126	MIR4686	microRNA 4686	+
ERα_CHIA-PET_0649	chr11	2326411	2327325	3625	NM_139022	10077	TSPAN32	tetraspanin 32	+
ERα_CHIA-PET_0650	chr11	2504533	2505496	22330	NM_181798	3784	KCNQ1	potassium channel, voltage gated KQT-like subfamily Q, member 1	+
ERα_CHIA-PET_0651	chr11	8506708	8507606	108398	NM_001289061	65975	STK33	serine/threonine kinase 33
ERα_CHIA-PET_0652	chr11	12269821	12270707	-38183	NM_032867	84953	MICALCL	MICAL C-terminal like
ERα_CHIA-PET_0653	chr11	12705231	12706009	9651	NM_021961	7003	TEAD1	TEA domain family member 1 (SV40 transcriptional enhancer factor)
ERα_CHIA-PET_0654	chr11	12749579	12750427	54034	NM_021961	7003	TEAD1	TEA domain family member 1 (SV40 transcriptional enhancer factor)	+
ERα_CHIA-PET_0655	chr11	12790345	12790900	94653	NM_021961	7003	TEAD1	TEA domain family member 1 (SV40 transcriptional enhancer factor)		+
ERα_CHIA-PET_0656	chr11	12816481	12817381	120962	NM_021961	7003	TEAD1	TEA domain family member 1 (SV40 transcriptional enhancer factor)
ERα_CHIA-PET_0657	chr11	12850482	12851387	154965	NM_021961	7003	TEAD1	TEA domain family member 1 (SV40 transcriptional enhancer factor)	+
ERα_CHIA-PET_0658	chr11	15279935	15280768	109703	NM_001278314	387755	INSC	inscuteable homolog (Drosophila)
ERα_CHIA-PET_0659	chr11	15452168	15452849	-212923	NM_001293172	102724957	LOC102724957	uncharacterized LOC102724957	+
ERα_CHIA-PET_0660	chr11	15515239	15516180	-149722	NM_001293172	102724957	LOC102724957	uncharacterized LOC102724957
ERα_CHIA-PET_0661	chr11	15636693	15637607	-28281	NM_001293172	102724957	LOC102724957	uncharacterized LOC102724957	+
ERα_CHIA-PET_0662	chr11	16804812	16805340	44928	NM_014267	10944	C11orf58	chromosome 11 open reading frame 58	+
ERα_CHIA-PET_0663	chr11	16977898	16979137	57446	NM_175058	144100	PLEKHA7	pleckstrin homology domain containing, family A member 7		+
ERα_CHIA-PET_0664	chr11	17003762	17004705	31730	NM_175058	144100	PLEKHA7	pleckstrin homology domain containing, family A member 7
ERα_CHIA-PET_0665	chr11	17007773	17009326	27414	NM_175058	144100	PLEKHA7	pleckstrin homology domain containing, family A member 7	+
ERα_CHIA-PET_0666	chr11	17010606	17011618	24851	NM_175058	144100	PLEKHA7	pleckstrin homology domain containing, family A member 7	+
ERα_CHIA-PET_0667	chr11	17260595	17261373	-37302	NM_005013	4925	NUCB2	nucleobindin 2	+
ERα_CHIA-PET_0668	chr11	17294459	17295035	-3539	NM_005013	4925	NUCB2	nucleobindin 2
ERα_CHIA-PET_0669	chr11	17426969	17427915	-16564	NM_001166290	3767	KCNJ11	potassium channel, inwardly rectifying subfamily J, member 11
ERα_CHIA-PET_0670	chr11	17791263	17792453	34363	NM_001112741	3746	KCNC1	potassium channel, voltage gated Shaw related subfamily C, member 1		+
ERα_CHIA-PET_0671	chr11	17833754	17834540	76652	NM_001112741	3746	KCNC1	potassium channel, voltage gated Shaw related subfamily C, member 1		+
ERα_CHIA-PET_0672	chr11	17946176	17946920	88161	NM_012139	26297	SERGEF	secretion regulating guanine nucleotide exchange factor		+
ERα_CHIA-PET_0673	chr11	19411356	19412055	39434	NM_001111018	89797	NAV2	neuron navigator 2
ERα_CHIA-PET_0674	chr11	19441380	19442001	69419	NM_001111018	89797	NAV2	neuron navigator 2
ERα_CHIA-PET_0675	chr11	20016078	20017396	-27365	NM_001111019	89797	NAV2	neuron navigator 2
ERα_CHIA-PET_0676	chr11	20037395	20037914	-6448	NM_001111019	89797	NAV2	neuron navigator 2
ERα_CHIA-PET_0677	chr11	20052795	20054098	9344	NM_001111019	89797	NAV2	neuron navigator 2	+
ERα_CHIA-PET_0678	chr11	20056919	20057987	13351	NM_001111019	89797	NAV2	neuron navigator 2		+
ERα_CHIA-PET_0679	chr11	20063669	20064260	6885	NR_046672	100874014	NAV2-AS2	NAV2 antisense RNA 2
ERα_CHIA-PET_0680	chr11	20090333	20090969	-19802	NR_046672	100874014	NAV2-AS2	NAV2 antisense RNA 2	+
ERα_CHIA-PET_0681	chr11	20135509	20136062	46085	NM_001029865	120237	DBX1	developing brain homeobox 1	+
ERα_CHIA-PET_0682	chr11	20158180	20158698	23431	NM_001029865	120237	DBX1	developing brain homeobox 1
ERα_CHIA-PET_0683	chr11	27662321	27662847	-6410	NR_102708	101410541	LINC00678	long intergenic non-protein coding RNA 678
ERα_CHIA-PET_0684	chr11	27670388	27670941	10532	NM_170735	627	BDNF	brain-derived neurotrophic factor		+
ERα_CHIA-PET_0685	chr11	30387348	30388155	43105	NM_152316	120534	ARL14EP	ADP-ribosylation factor like GTPase 14 effector protein
ERα_CHIA-PET_0686	chr11	30416805	30417453	72483	NM_152316	120534	ARL14EP	ADP-ribosylation factor like GTPase 14 effector protein	+
ERα_CHIA-PET_0687	chr11	30459988	30460582	115639	NM_152316	120534	ARL14EP	ADP-ribosylation factor like GTPase 14 effector protein
ERα_CHIA-PET_0688	chr11	30542912	30543892	58638	NM_001584	744	MPPED2	metallophosphoesterase domain containing 2	+
ERα_CHIA-PET_0689	chr11	30557899	30558444	43869	NM_001584	744	MPPED2	metallophosphoesterase domain containing 2
ERα_CHIA-PET_0690	chr11	30568618	30569233	33115	NM_001584	744	MPPED2	metallophosphoesterase domain containing 2
ERα_CHIA-PET_0691	chr11	30582036	30582829	19608	NM_001584	744	MPPED2	metallophosphoesterase domain containing 2
ERα_CHIA-PET_0692	chr11	32381241	32382124	70681	NM_001198551	7490	WT1	Wilms tumor 1	+	+
ERα_CHIA-PET_0693	chr11	34306122	34306999	72995	NM_145804	25841	ABTB2	ankyrin repeat and BTB (POZ) domain containing 2	+
ERα_CHIA-PET_0694	chr11	34317677	34318487	61473	NM_145804	25841	ABTB2	ankyrin repeat and BTB (POZ) domain containing 2	+	+
ERα_CHIA-PET_0695	chr11	35119497	35120096	39783	NR_120528	100507144	LOC100507144	uncharacterized LOC100507144	+
ERα_CHIA-PET_0696	chr11	35297654	35298177	137498	NM_001001392	960	CD44	CD44 molecule (Indian blood group)
ERα_CHIA-PET_0697	chr11	35317291	35318106	123407	NM_004171	6506	SLC1A2	solute carrier family 1 (glial high affinity glutamate transporter), member 2		+
ERα_CHIA-PET_0698	chr11	35387121	35387876	53607	NM_004171	6506	SLC1A2	solute carrier family 1 (glial high affinity glutamate transporter), member 2	+
ERα_CHIA-PET_0699	chr11	35411231	35411733	29623	NM_004171	6506	SLC1A2	solute carrier family 1 (glial high affinity glutamate transporter), member 2	+
ERα_CHIA-PET_0700	chr11	35412278	35412995	28469	NM_004171	6506	SLC1A2	solute carrier family 1 (glial high affinity glutamate transporter), member 2
ERα_CHIA-PET_0701	chr11	46360081	46360829	6000	NM_201532	8525	DGKZ	diacylglycerol kinase, zeta	+	+
ERα_CHIA-PET_0702	chr11	46373235	46374573	4948	NM_001199266	8525	DGKZ	diacylglycerol kinase, zeta
ERα_CHIA-PET_0703	chr11	46384919	46385811	2220	NM_001105540	8525	DGKZ	diacylglycerol kinase, zeta	+
ERα_CHIA-PET_0704	chr11	46963457	46964222	5599	NM_001003678	79096	C11orf49	chromosome 11 open reading frame 49		+
ERα_CHIA-PET_0705	chr11	47006542	47007193	48627	NM_001003678	79096	C11orf49	chromosome 11 open reading frame 49
ERα_CHIA-PET_0706	chr11	50670380	50671219	302481	NR_024504	646813	LOC646813	DEAH (Asp-Glu-Ala-His) box helicase 9 pseudogene
ERα_CHIA-PET_0707	chr11	65147133	65148138	2222	NM_001278250	283130	SLC25A45	solute carrier family 25, member 45	+
ERα_CHIA-PET_0708	chr11	65185983	65186782	-3887	NR_131012	283131	NEAT1	nuclear paraspeckle assembly transcript 1 (non-protein coding)		+
ERα_CHIA-PET_0709	chr11	66477254	66477887	11300	NM_006946	6712	SPTBN2	spectrin, beta, non-erythrocytic 2	+
ERα_CHIA-PET_0710	chr11	66516351	66517041	4489	NM_001302084	79703	C11orf80	chromosome 11 open reading frame 80
ERα_CHIA-PET_0711	chr11	66764438	66765124	22027	NM_001136485	254439	C11orf86	chromosome 11 open reading frame 86	+
ERα_CHIA-PET_0712	chr11	66794967	66795868	4601	NM_177963	91683	SYT12	synaptotagmin XII
ERα_CHIA-PET_0713	chr11	66822451	66823273	-1427	NM_014578	29984	RHOD	ras homolog family member D
ERα_CHIA-PET_0714	chr11	66829394	66830275	5545	NM_001300886	29984	RHOD	ras homolog family member D	+
ERα_CHIA-PET_0715	chr11	67785488	67786448	8193	NM_000694	221	ALDH3B1	aldehyde dehydrogenase 3 family, member B1	+	+
ERα_CHIA-PET_0716	chr11	67805428	67806286	-605	NM_006019	10312	TCIRG1	T-cell, immune regulator 1, ATPase, H+ transporting, lysosomal V0 subunit A3	+
ERα_CHIA-PET_0717	chr11	68586800	68587340	22329	NM_001031847	1374	CPT1A	carnitine palmitoyltransferase 1A (liver)	+
ERα_CHIA-PET_0718	chr11	68675215	68675800	4188	NM_002180	3508	IGHMBP2	immunoglobulin mu binding protein 2	+
ERα_CHIA-PET_0719	chr11	68713804	68714650	34228	NM_198923	116512	MRGPRD	MAS-related GPR, member D	+
ERα_CHIA-PET_0720	chr11	68882366	68883317	32197	NR_036122	100422846	MIR3164	microRNA 3164	+	+
ERα_CHIA-PET_0721	chr11	68889749	68891260	39860	NR_036122	100422846	MIR3164	microRNA 3164
ERα_CHIA-PET_0722	chr11	69068866	69069889	7772	NM_001300923	26579	MYEOV	myeloma overexpressed	+
ERα_CHIA-PET_0723	chr11	69079930	69080968	18844	NM_001300923	26579	MYEOV	myeloma overexpressed		+
ERα_CHIA-PET_0724	chr11	69251440	69252220	-48499	NR_120544	101928292	LINC01488	long intergenic non-protein coding RNA 1488
ERα_CHIA-PET_0725	chr11	69294592	69295243	-5412	NR_120544	101928292	LINC01488	long intergenic non-protein coding RNA 1488
ERα_CHIA-PET_0726	chr11	69299707	69300579	-186	NR_120544	101928292	LINC01488	long intergenic non-protein coding RNA 1488
ERα_CHIA-PET_0727	chr11	69308657	69309665	8832	NR_120542	101928292	LINC01488	long intergenic non-protein coding RNA 1488		+
ERα_CHIA-PET_0728	chr11	69325330	69326114	25393	NR_120542	101928292	LINC01488	long intergenic non-protein coding RNA 1488		+
ERα_CHIA-PET_0729	chr11	69329615	69330726	29841	NR_120542	101928292	LINC01488	long intergenic non-protein coding RNA 1488	+
ERα_CHIA-PET_0730	chr11	69339000	69340070	39206	NR_120542	101928292	LINC01488	long intergenic non-protein coding RNA 1488
ERα_CHIA-PET_0731	chr11	69344684	69345415	44720	NR_120542	101928292	LINC01488	long intergenic non-protein coding RNA 1488	+
ERα_CHIA-PET_0732	chr11	69348497	69349548	48693	NR_120542	101928292	LINC01488	long intergenic non-protein coding RNA 1488
ERα_CHIA-PET_0733	chr11	69369393	69370379	69557	NR_120542	101928292	LINC01488	long intergenic non-protein coding RNA 1488
ERα_CHIA-PET_0734	chr11	69452865	69454429	-2226	NM_053056	595	CCND1	cyclin D1
ERα_CHIA-PET_0735	chr11	69468719	69470282	13627	NM_053056	595	CCND1	cyclin D1	+
ERα_CHIA-PET_0736	chr11	69511684	69512638	6945	NM_005117	9965	FGF19	fibroblast growth factor 19	+
ERα_CHIA-PET_0737	chr11	69623398	69624290	10348	NM_005247	2248	FGF3	fibroblast growth factor 3
ERα_CHIA-PET_0738	chr11	69705953	69707211	-72390	NM_005247	2248	FGF3	fibroblast growth factor 3	+
ERα_CHIA-PET_0739	chr11	69707546	69708046	-73604	NM_005247	2248	FGF3	fibroblast growth factor 3
ERα_CHIA-PET_0740	chr11	69709285	69709832	-75366	NM_005247	2248	FGF3	fibroblast growth factor 3
ERα_CHIA-PET_0741	chr11	69720933	69721590	-87069	NM_005247	2248	FGF3	fibroblast growth factor 3
ERα_CHIA-PET_0742	chr11	69951888	69953175	21015	NR_030691	55107	ANO1	anoctamin 1, calcium activated chloride channel	+	+
ERα_CHIA-PET_0743	chr11	69962426	69963387	31390	NR_030691	55107	ANO1	anoctamin 1, calcium activated chloride channel
ERα_CHIA-PET_0744	chr11	70105214	70105780	-11309	NM_177423	8500	PPFIA1	protein tyrosine phosphatase, receptor type, f polypeptide (PTPRF), interacting protein (liprin), alpha 1	+
ERα_CHIA-PET_0745	chr11	70560497	70561233	-52920	NR_110766	22941	SHANK2	SH3 and multiple ankyrin repeat domains 2
ERα_CHIA-PET_0746	chr11	70606140	70607073	-98661	NR_110766	22941	SHANK2	SH3 and multiple ankyrin repeat domains 2	+
ERα_CHIA-PET_0747	chr11	70615231	70615949	-93305	NR_073536	220070	SHANK2-AS3	SHANK2 antisense RNA 3	+	+
ERα_CHIA-PET_0748	chr11	70651356	70652669	-56883	NR_073536	220070	SHANK2-AS3	SHANK2 antisense RNA 3	+
ERα_CHIA-PET_0749	chr11	70781357	70782094	-63252	NR_037437	100500844	MIR3664	microRNA 3664	+
ERα_CHIA-PET_0750	chr11	71163910	71164465	-30	NM_018161	55191	NADSYN1	NAD synthetase 1
ERα_CHIA-PET_0751	chr11	71192203	71193270	8187	NR_106812	102466728	MIR6754	microRNA 6754	+
ERα_CHIA-PET_0752	chr11	71211680	71212297	-26325	NM_001012503	440050	KRTAP5-7	keratin associated protein 5-7
ERα_CHIA-PET_0753	chr11	72456736	72457426	6353	NM_001040118	116985	ARAP1	ArfGAP with RhoGAP domain, ankyrin repeat and PH domain 1	+
ERα_CHIA-PET_0754	chr11	72483761	72484574	-10408	NR_039841	100616410	MIR4692	microRNA 4692	+
ERα_CHIA-PET_0755	chr11	72497148	72498179	3088	NR_039841	100616410	MIR4692	microRNA 4692	+
ERα_CHIA-PET_0756	chr11	72534617	72535170	9442	NM_033388	89849	ATG16L2	autophagy related 16-like 2
ERα_CHIA-PET_0757	chr11	72903147	72906742	-24399	NM_002564	5029	P2RY2	purinergic receptor P2Y, G-protein coupled, 2	+
ERα_CHIA-PET_0758	chr11	72938583	72939947	9763	NM_176071	5029	P2RY2	purinergic receptor P2Y, G-protein coupled, 2	+
ERα_CHIA-PET_0759	chr11	72947306	72948116	18209	NM_176071	5029	P2RY2	purinergic receptor P2Y, G-protein coupled, 2		+
ERα_CHIA-PET_0760	chr11	75044440	75045416	1302	NR_029891	442900	MIR326	microRNA 326	+
ERα_CHIA-PET_0761	chr11	75053724	75054569	-7916	NR_029891	442900	MIR326	microRNA 326
ERα_CHIA-PET_0762	chr11	75060432	75061020	2149	NM_020251	408	ARRB1	arrestin, beta 1
ERα_CHIA-PET_0763	chr11	75062109	75062780	431	NM_020251	408	ARRB1	arrestin, beta 1	+
ERα_CHIA-PET_0764	chr11	75502695	75503651	-23039	NM_003369	7405	UVRAG	UV radiation resistance associated	+	+
ERα_CHIA-PET_0765	chr11	76461185	76461954	-28736	NR_024042	390226	GUCY2EP	guanylate cyclase 2E, pseudogene	+
ERα_CHIA-PET_0766	chr11	76483285	76484415	-9507	NM_001258210	25987	TSKU	tsukushi, small leucine rich proteoglycan	+
ERα_CHIA-PET_0767	chr11	76499005	76500464	5449	NM_015516	25987	TSKU	tsukushi, small leucine rich proteoglycan
ERα_CHIA-PET_0768	chr11	76632501	76633061	60864	NM_001300954	55331	ACER3	alkaline ceramidase 3
ERα_CHIA-PET_0769	chr11	76730960	76731952	-13929	NM_138706	192134	B3GNT6	UDP-GlcNAc:betaGal beta-1,3-N-acetylglucosaminyltransferase 6
ERα_CHIA-PET_0770	chr11	76746306	76747019	1277	NM_138706	192134	B3GNT6	UDP-GlcNAc:betaGal beta-1,3-N-acetylglucosaminyltransferase 6	+
ERα_CHIA-PET_0771	chr11	76749218	76750323	4385	NM_138706	192134	B3GNT6	UDP-GlcNAc:betaGal beta-1,3-N-acetylglucosaminyltransferase 6	+
ERα_CHIA-PET_0772	chr11	77856497	77857390	6104	NR_102280	100289388	KCTD21-AS1	KCTD21 antisense RNA 1
ERα_CHIA-PET_0773	chr11	77866820	77868130	16636	NR_102280	100289388	KCTD21-AS1	KCTD21 antisense RNA 1	+
ERα_CHIA-PET_0774	chr11	77970552	77971869	71352	NM_020798	57558	USP35	ubiquitin specific peptidase 35		+
ERα_CHIA-PET_0775	chr11	77979062	77979772	73509	NM_012296	9846	GAB2	GRB2-associated binding protein 2
ERα_CHIA-PET_0776	chr11	78022660	78023676	29758	NM_012296	9846	GAB2	GRB2-associated binding protein 2	+
ERα_CHIA-PET_0777	chr11	78107456	78108125	21078	NM_080491	9846	GAB2	GRB2-associated binding protein 2	+
ERα_CHIA-PET_0778	chr11	78550316	78550961	-264729	NM_001243251	79731	NARS2	asparaginyl-tRNA synthetase 2, mitochondrial (putative)
ERα_CHIA-PET_0779	chr11	78559720	78560614	-274258	NM_001243251	79731	NARS2	asparaginyl-tRNA synthetase 2, mitochondrial (putative)	+
ERα_CHIA-PET_0780	chr11	78684649	78685609	-399220	NM_001243251	79731	NARS2	asparaginyl-tRNA synthetase 2, mitochondrial (putative)
ERα_CHIA-PET_0781	chr11	78755248	78755860	357599	NR_030598	100126333	MIR708	microRNA 708
ERα_CHIA-PET_0782	chr11	78770477	78771858	341986	NR_030598	100126333	MIR708	microRNA 708	+
ERα_CHIA-PET_0783	chr11	79064535	79065471	48150	NR_030598	100126333	MIR708	microRNA 708
ERα_CHIA-PET_0784	chr11	79982704	79983386	490801	NR_120570	101928944	LOC101928944	uncharacterized LOC101928944	+
ERα_CHIA-PET_0785	chr11	80431088	80432022	42291	NR_120570	101928944	LOC101928944	uncharacterized LOC101928944	+
ERα_CHIA-PET_0786	chr11	82705232	82705817	40087	NM_001286059	27314	RAB30	RAB30, member RAS oncogene family	+	+
ERα_CHIA-PET_0787	chr11	82714991	82715792	30220	NM_001286059	27314	RAB30	RAB30, member RAS oncogene family	+
ERα_CHIA-PET_0788	chr11	82755986	82756559	-3632	NR_033347	100379250	SNORA70E	small nucleolar RNA, H/ACA box 70E
ERα_CHIA-PET_0789	chr11	85539472	85540039	-17553	NM_032943	54843	SYTL2	synaptotagmin-like 2
ERα_CHIA-PET_0790	chr11	85555612	85556260	-10208	NM_001286159	220047	CCDC83	coiled-coil domain containing 83		+
ERα_CHIA-PET_0791	chr11	86382196	86383151	567	NM_001014811	10873	ME3	malic enzyme 3, NADP(+)-dependent, mitochondrial	+
ERα_CHIA-PET_0792	chr11	86416822	86418116	-33791	NM_001161586	10873	ME3	malic enzyme 3, NADP(+)-dependent, mitochondrial		+
ERα_CHIA-PET_0793	chr11	86447028	86447879	-54648	NM_001293180	11098	PRSS23	protease, serine, 23		+
ERα_CHIA-PET_0794	chr11	86473382	86474187	-28317	NM_001293180	11098	PRSS23	protease, serine, 23		+
ERα_CHIA-PET_0795	chr11	86486983	86487919	-14650	NM_001293180	11098	PRSS23	protease, serine, 23	+	+
ERα_CHIA-PET_0796	chr11	86501277	86501978	-474	NM_001293180	11098	PRSS23	protease, serine, 23
ERα_CHIA-PET_0797	chr11	86506627	86507541	-4198	NR_120591	11098	PRSS23	protease, serine, 23
ERα_CHIA-PET_0798	chr11	87465312	87465814	443072	NM_022337	23682	RAB38	RAB38, member RAS oncogene family	+
ERα_CHIA-PET_0799	chr11	87635092	87635701	273239	NM_022337	23682	RAB38	RAB38, member RAS oncogene family	+
ERα_CHIA-PET_0800	chr11	94552526	94553047	51278	NM_130847	154810	AMOTL1	angiomotin like 1
ERα_CHIA-PET_0801	chr11	94563661	94564624	62634	NM_130847	154810	AMOTL1	angiomotin like 1	+
ERα_CHIA-PET_0802	chr11	94578517	94579096	77298	NM_130847	154810	AMOTL1	angiomotin like 1
ERα_CHIA-PET_0803	chr11	100870077	100871081	7768	NM_032021	83935	TMEM133	transmembrane protein 133	+
ERα_CHIA-PET_0804	chr11	100904464	100905421	42131	NM_032021	83935	TMEM133	transmembrane protein 133	+
ERα_CHIA-PET_0805	chr11	100948858	100949840	50445	NR_073143	5241	PGR	progesterone receptor	+
ERα_CHIA-PET_0806	chr11	101049027	101050326	-49132	NM_000926	5241	PGR	progesterone receptor
ERα_CHIA-PET_0807	chr11	101169599	101171002	-169756	NM_000926	5241	PGR	progesterone receptor	+
ERα_CHIA-PET_0808	chr11	101171177	101171853	-170971	NM_000926	5241	PGR	progesterone receptor	+	+
ERα_CHIA-PET_0809	chr11	101206461	101208275	183268	NR_037485	100500823	MIR3920	microRNA 3920	+
ERα_CHIA-PET_0810	chr11	101222233	101223259	167890	NR_037485	100500823	MIR3920	microRNA 3920	+
ERα_CHIA-PET_0811	chr11	101306932	101308039	83151	NR_037485	100500823	MIR3920	microRNA 3920	+
ERα_CHIA-PET_0812	chr11	101308645	101309614	81507	NR_037485	100500823	MIR3920	microRNA 3920	+
ERα_CHIA-PET_0813	chr11	101312066	101313238	77984	NR_037485	100500823	MIR3920	microRNA 3920	+
ERα_CHIA-PET_0814	chr11	112163621	112164345	22511	NR_126004	283140	LOC283140	uncharacterized LOC283140	+
ERα_CHIA-PET_0815	chr11	112172511	112173339	31453	NR_126004	283140	LOC283140	uncharacterized LOC283140
ERα_CHIA-PET_0816	chr11	112192159	112192923	51069	NR_126004	283140	LOC283140	uncharacterized LOC283140
ERα_CHIA-PET_0817	chr11	114132312	114133137	-33811	NM_006169	4837	NNMT	nicotinamide N-methyltransferase	+	+
ERα_CHIA-PET_0818	chr11	114186372	114187027	20164	NM_006169	4837	NNMT	nicotinamide N-methyltransferase
ERα_CHIA-PET_0819	chr11	116611286	116612261	31941	NM_001159736	84811	BUD13	BUD13 homolog	+
ERα_CHIA-PET_0820	chr11	116661814	116662326	1066	NM_001166598	116519	APOA5	apolipoprotein A-V	+
ERα_CHIA-PET_0821	chr11	116678741	116680282	14500	NM_000482	337	APOA4	apolipoprotein A-IV
ERα_CHIA-PET_0822	chr11	116684327	116685157	9269	NM_000482	337	APOA4	apolipoprotein A-IV
ERα_CHIA-PET_0823	chr11	116702838	116704151	2870	NM_000040	345	APOC3	apolipoprotein C-III
ERα_CHIA-PET_0824	chr11	116706591	116707533	229	NR_126362	104326055	APOA1-AS	APOA1 antisense RNA	+	+
ERα_CHIA-PET_0825	chr11	117054423	117054978	4761	NM_001040455	51092	SIDT2	SID1 transmembrane family, member 2
ERα_CHIA-PET_0826	chr11	117173464	117174280	-7486	NM_001207049	23621	BACE1	beta-site APP-cleaving enzyme 1	+
ERα_CHIA-PET_0827	chr11	117758561	117759282	-10720	NM_001164831	53826	FXYD6	FXYD domain containing ion transport regulator 6
ERα_CHIA-PET_0828	chr11	117790415	117791216	9353	NM_001206790	84000	TMPRSS13	transmembrane protease, serine 13	+
ERα_CHIA-PET_0829	chr11	117807847	117808617	-8064	NM_001077263	84000	TMPRSS13	transmembrane protease, serine 13
ERα_CHIA-PET_0830	chr11	117823678	117824559	-23950	NM_001077263	84000	TMPRSS13	transmembrane protease, serine 13
ERα_CHIA-PET_0831	chr11	117870091	117870775	13327	NR_026691	3587	IL10RA	interleukin 10 receptor, alpha	+	+
ERα_CHIA-PET_0832	chr11	117928279	117929289	-18943	NM_001173552	56649	TMPRSS4	transmembrane protease, serine 4	+
ERα_CHIA-PET_0833	chr11	119768973	119769563	168975	NR_120587	102724301	LOC102724301	uncharacterized LOC102724301
ERα_CHIA-PET_0834	chr11	119780730	119781328	180736	NR_120587	102724301	LOC102724301	uncharacterized LOC102724301	+	+
ERα_CHIA-PET_0835	chr11	120669905	120670453	19645	NR_133008	105369532	LOC105369532	uncharacterized LOC105369532	+
ERα_CHIA-PET_0836	chr11	120801799	120802326	26686	NR_133004	101929208	LOC101929208	uncharacterized LOC101929208	+
ERα_CHIA-PET_0837	chr11	126235499	126236005	9963	NM_006278	6484	ST3GAL4	ST3 beta-galactoside alpha-2,3-sialyltransferase 4
ERα_CHIA-PET_0838	chr11	126252249	126253199	-20587	NM_001254758	6484	ST3GAL4	ST3 beta-galactoside alpha-2,3-sialyltransferase 4		+
ERα_CHIA-PET_0839	chr11	129185670	129186174	-59959	NM_003658	8538	BARX2	BARX homeobox 2
ERα_CHIA-PET_0840	chr11	129194216	129195162	-51192	NM_003658	8538	BARX2	BARX homeobox 2		+
ERα_CHIA-PET_0841	chr11	129564046	129565034	-77376	NR_120582	101929557	LINC01395	long intergenic non-protein coding RNA 1395	+	+
ERα_CHIA-PET_0842	chr11	129565601	129566385	-78829	NR_120582	101929557	LINC01395	long intergenic non-protein coding RNA 1395	+
ERα_CHIA-PET_0843	chr11	129601283	129601819	-84190	NM_138788	120224	TMEM45B	transmembrane protein 45B
ERα_CHIA-PET_0844	chr11	130271223	130271741	27057	NM_007037	11095	ADAMTS8	ADAM metallopeptidase with thrombospondin type 1 motif 8
ERα_CHIA-PET_0845	chr11	130523724	130524240	-12648	NR_107019	102466873	MIR8052	microRNA 8052
ERα_CHIA-PET_0846	chr11	130542632	130543400	165	NM_001271983	283171	C11orf44	chromosome 11 open reading frame 44	+	+
ERα_CHIA-PET_0847	chr11	131551833	131552534	-18733	NR_126159	101929637	NTM-AS1	NTM antisense RNA 1
ERα_CHIA-PET_0848	chr11	131561999	131562753	-28926	NR_126159	101929637	NTM-AS1	NTM antisense RNA 1
ERα_CHIA-PET_0849	chr11	131566397	131567208	-33352	NR_126159	101929637	NTM-AS1	NTM antisense RNA 1	+	+
ERα_CHIA-PET_0850	chr11	131766868	131767806	-13375	NM_001144059	50863	NTM	neurotrimin
ERα_CHIA-PET_0851	chr11	132445145	132445663	291208	NR_046820	100874281	NTM-IT	NTM intronic transcript
ERα_CHIA-PET_0852	chr11	133845531	133846040	-19136	NM_001277285	22997	IGSF9B	immunoglobulin superfamily, member 9B	+
ERα_CHIA-PET_0853	chr11	134114435	134115162	8462	NM_199297	29087	THYN1	thymocyte nuclear protein 1	+
ERα_CHIA-PET_0854	chr11	134128179	134129207	5259	NM_014384	27034	ACAD8	acyl-CoA dehydrogenase family, member 8
ERα_CHIA-PET_0855	chr11	134509692	134510438	203689	NR_033852	283177	LOC283177	uncharacterized LOC283177
ERα_CHIA-PET_0856	chr12	622364	623146	53212	NM_173593	283358	B4GALNT3	beta-1,4-N-acetyl-galactosaminyl transferase 3	+
ERα_CHIA-PET_0857	chr12	632965	634118	63998	NM_173593	283358	B4GALNT3	beta-1,4-N-acetyl-galactosaminyl transferase 3	+
ERα_CHIA-PET_0858	chr12	680826	681736	38298	NM_001294345	4815	NINJ2	ninjurin 2
ERα_CHIA-PET_0859	chr12	1815658	1816160	15662	NM_024551	79602	ADIPOR2	adiponectin receptor 2
ERα_CHIA-PET_0860	chr12	1876748	1877565	-52277	NM_001163925	654429	LRTM2	leucine-rich repeats and transmembrane domains 2
ERα_CHIA-PET_0861	chr12	1923172	1923815	-5940	NM_001163925	654429	LRTM2	leucine-rich repeats and transmembrane domains 2
ERα_CHIA-PET_0862	chr12	1940155	1940669	10979	NM_001163926	654429	LRTM2	leucine-rich repeats and transmembrane domains 2
ERα_CHIA-PET_0863	chr12	1945479	1946181	16397	NM_001163926	654429	LRTM2	leucine-rich repeats and transmembrane domains 2
ERα_CHIA-PET_0864	chr12	1950361	1950994	21244	NM_001163926	654429	LRTM2	leucine-rich repeats and transmembrane domains 2		+
ERα_CHIA-PET_0865	chr12	1968517	1969333	39492	NM_001163926	654429	LRTM2	leucine-rich repeats and transmembrane domains 2
ERα_CHIA-PET_0866	chr12	2041055	2042058	4186	NR_036546	100271702	LINC00940	long intergenic non-protein coding RNA 940	+	+
ERα_CHIA-PET_0867	chr12	2873631	2874610	6715	NR_033958	283440	LOC283440	uncharacterized LOC283440	+
ERα_CHIA-PET_0868	chr12	2884219	2885122	-3835	NR_033958	283440	LOC283440	uncharacterized LOC283440
ERα_CHIA-PET_0869	chr12	2885738	2886308	-5188	NR_033958	283440	LOC283440	uncharacterized LOC283440	+	+
ERα_CHIA-PET_0870	chr12	2904754	2905740	1139	NM_002014	2288	FKBP4	FK506 binding protein 4	+
ERα_CHIA-PET_0871	chr12	6174211	6175106	59178	NM_000552	7450	VWF	von Willebrand factor
ERα_CHIA-PET_0872	chr12	6309293	6309813	71	NM_001769	928	CD9	CD9 molecule
ERα_CHIA-PET_0873	chr12	6324959	6325810	15902	NM_001769	928	CD9	CD9 molecule	+
ERα_CHIA-PET_0874	chr12	6344219	6345635	35445	NM_001769	928	CD9	CD9 molecule
ERα_CHIA-PET_0875	chr12	6346283	6347389	37354	NM_001769	928	CD9	CD9 molecule
ERα_CHIA-PET_0876	chr12	6363677	6364600	54656	NM_001769	928	CD9	CD9 molecule
ERα_CHIA-PET_0877	chr12	6373440	6374584	-45590	NM_018173	55200	PLEKHG6	pleckstrin homology domain containing, family G (with RhoGef domain) member 6		+
ERα_CHIA-PET_0878	chr12	6387375	6388488	-31671	NM_018173	55200	PLEKHG6	pleckstrin homology domain containing, family G (with RhoGef domain) member 6	+
ERα_CHIA-PET_0879	chr12	6472990	6473695	11048	NM_001159576	6337	SCNN1A	sodium channel, non voltage gated 1 alpha subunit	+
ERα_CHIA-PET_0880	chr12	9284633	9285460	-16488	NM_000014	2	A2M	alpha-2-macroglobulin
ERα_CHIA-PET_0881	chr12	9432687	9433670	-3075	NR_024374	642846	LOC642846	DEAD/H (Asp-Glu-Ala-Asp/His) box polypeptide 11-like	+
ERα_CHIA-PET_0882	chr12	12972394	12973301	6567	NM_016355	51202	DDX47	DEAD (Asp-Glu-Ala-Asp) box polypeptide 47
ERα_CHIA-PET_0883	chr12	13024938	13025979	-2953	NR_003932	387841	RPL13AP20	ribosomal protein L13a pseudogene 20		+
ERα_CHIA-PET_0884	chr12	13036016	13037375	-7261	NM_003979	9052	GPRC5A	G protein-coupled receptor, class C, group 5, member A	+	+
ERα_CHIA-PET_0885	chr12	13199805	13200481	1018	NR_106988	102465753	MIR7641-2	microRNA 7641-2	+
ERα_CHIA-PET_0886	chr12	13214573	13215160	15741	NR_106988	102465753	MIR7641-2	microRNA 7641-2
ERα_CHIA-PET_0887	chr12	13254774	13255439	1524	NM_001206842	83445	GSG1	germ cell associated 1	+
ERα_CHIA-PET_0888	chr12	13288567	13289312	-32309	NM_001080555	83445	GSG1	germ cell associated 1		+
ERα_CHIA-PET_0889	chr12	14972693	14973595	-6028	NM_001013698	440087	SMCO3	single-pass membrane protein with coiled-coil domains 3	+	+
ERα_CHIA-PET_0890	chr12	14988887	14989735	7102	NM_021071	420	ART4	ADP-ribosyltransferase 4 (Dombrock blood group)		+
ERα_CHIA-PET_0891	chr12	15021794	15022317	16798	NM_000900	4256	MGP	matrix Gla protein
ERα_CHIA-PET_0892	chr12	15340902	15341729	33096	NM_001190726	85004	RERG	RAS-like, estrogen-regulated, growth inhibitor
ERα_CHIA-PET_0893	chr12	15344580	15345294	29474	NM_001190726	85004	RERG	RAS-like, estrogen-regulated, growth inhibitor	+	+
ERα_CHIA-PET_0894	chr12	15368764	15369800	5129	NM_001190726	85004	RERG	RAS-like, estrogen-regulated, growth inhibitor	+	+
ERα_CHIA-PET_0895	chr12	15369907	15370617	4149	NM_001190726	85004	RERG	RAS-like, estrogen-regulated, growth inhibitor
ERα_CHIA-PET_0896	chr12	15374826	15375407	-705	NM_032918	85004	RERG	RAS-like, estrogen-regulated, growth inhibitor
ERα_CHIA-PET_0897	chr12	15396560	15397206	-22472	NM_032918	85004	RERG	RAS-like, estrogen-regulated, growth inhibitor	+
ERα_CHIA-PET_0898	chr12	15426561	15427714	-48054	NM_002848	5800	PTPRO	protein tyrosine phosphatase, receptor type, O	+
ERα_CHIA-PET_0899	chr12	15948928	15949804	-6856	NM_004447	2059	EPS8	epidermal growth factor receptor pathway substrate 8
ERα_CHIA-PET_0900	chr12	17641988	17642986	-183746	NR_039770	100616279	MIR3974	microRNA 3974
ERα_CHIA-PET_0901	chr12	18657837	18658699	232725	NM_033123	89869	PLCZ1	phospholipase C, zeta 1
ERα_CHIA-PET_0902	chr12	18699160	18699896	191465	NM_033123	89869	PLCZ1	phospholipase C, zeta 1		+
ERα_CHIA-PET_0903	chr12	25654295	25655060	51540	NM_001145729	160492	LMNTD1	lamin tail domain containing 1
ERα_CHIA-PET_0904	chr12	25671271	25672164	34500	NM_001145729	160492	LMNTD1	lamin tail domain containing 1
ERα_CHIA-PET_0905	chr12	25725831	25726457	-19927	NM_001145728	160492	LMNTD1	lamin tail domain containing 1	+	+
ERα_CHIA-PET_0906	chr12	26254025	26255056	23463	NM_030762	79365	BHLHE41	basic helix-loop-helix family, member e41	+	+
ERα_CHIA-PET_0907	chr12	26581661	26582219	233434	NM_005086	8082	SSPN	sarcospan
ERα_CHIA-PET_0908	chr12	31584051	31584892	-105312	NM_001135812	58516	FAM60A	family with sequence similarity 60, member A		+
ERα_CHIA-PET_0909	chr12	31612642	31613587	-129743	NR_046909	100874249	DENND5B-AS1	DENND5B antisense RNA 1	+
ERα_CHIA-PET_0910	chr12	31628161	31629103	-114225	NR_046909	100874249	DENND5B-AS1	DENND5B antisense RNA 1	+
ERα_CHIA-PET_0911	chr12	31631487	31632066	-111081	NR_046909	100874249	DENND5B-AS1	DENND5B antisense RNA 1	+
ERα_CHIA-PET_0912	chr12	31678932	31679823	-63480	NR_046909	100874249	DENND5B-AS1	DENND5B antisense RNA 1
ERα_CHIA-PET_0913	chr12	39708224	39708926	128617	NM_001173464	55605	KIF21A	kinesin family member 21A	+
ERα_CHIA-PET_0914	chr12	39825425	39826136	11412	NM_001173464	55605	KIF21A	kinesin family member 21A
ERα_CHIA-PET_0915	chr12	39836721	39837540	62	NM_001173464	55605	KIF21A	kinesin family member 21A
ERα_CHIA-PET_0916	chr12	46547812	46548382	112181	NM_001278389	81539	SLC38A1	solute carrier family 38, member 1
ERα_CHIA-PET_0917	chr12	46573161	46574150	86623	NM_001278389	81539	SLC38A1	solute carrier family 38, member 1	+
ERα_CHIA-PET_0918	chr12	46595092	46595990	64737	NM_001278389	81539	SLC38A1	solute carrier family 38, member 1	+
ERα_CHIA-PET_0919	chr12	46849445	46850822	72243	NR_125381	100288798	LOC100288798	uncharacterized LOC100288798	+
ERα_CHIA-PET_0920	chr12	46887199	46888267	109843	NR_125381	100288798	LOC100288798	uncharacterized LOC100288798	+
ERα_CHIA-PET_0921	chr12	46903049	46903603	125436	NR_125381	100288798	LOC100288798	uncharacterized LOC100288798	+
ERα_CHIA-PET_0922	chr12	47343848	47344420	-124354	NM_018018	55089	SLC38A4	solute carrier family 38, member 4
ERα_CHIA-PET_0923	chr12	50044521	50045393	27554	NM_012272	25766	PRPF40B	PRP40 homolog, pre-mRNA processing factor B	+
ERα_CHIA-PET_0924	chr12	50197865	50198385	24083	NM_001037806	57701	NCKAP5L	NCK-associated protein 5-like	+
ERα_CHIA-PET_0925	chr12	50237019	50237555	-375	NM_181708	144233	BCDIN3D	BCDIN3 domain containing
ERα_CHIA-PET_0926	chr12	51912075	51912656	-72655	NM_001177984	6334	SCN8A	sodium channel, voltage gated, type VIII alpha subunit	+	+
ERα_CHIA-PET_0927	chr12	51923143	51923658	-61620	NM_001177984	6334	SCN8A	sodium channel, voltage gated, type VIII alpha subunit
ERα_CHIA-PET_0928	chr12	52541079	52541974	44258	NM_001081492	144501	KRT80	keratin 80, type II
ERα_CHIA-PET_0929	chr12	52542145	52543463	42980	NM_001081492	144501	KRT80	keratin 80, type II
ERα_CHIA-PET_0930	chr12	52585505	52586351	-144	NM_182507	144501	KRT80	keratin 80, type II	+
ERα_CHIA-PET_0931	chr12	52596911	52598110	7129	NM_001242696	283403	C12orf80	chromosome 12 open reading frame 80
ERα_CHIA-PET_0932	chr12	52609259	52609924	4877	NR_027358	283404	LINC00592	long intergenic non-protein coding RNA 592
ERα_CHIA-PET_0933	chr12	52726996	52727723	-12177	NM_002282	3889	KRT83	keratin 83, type II	+
ERα_CHIA-PET_0934	chr12	52732281	52732985	-17451	NM_002282	3889	KRT83	keratin 83, type II
ERα_CHIA-PET_0935	chr12	52738087	52739387	19669	NM_001300810	3891	KRT85	keratin 85, type II	+
ERα_CHIA-PET_0936	chr12	52765324	52766363	-4534	NM_002283	3891	KRT85	keratin 85, type II	+	+
ERα_CHIA-PET_0937	chr12	52773918	52774812	5052	NM_033045	3890	KRT84	keratin 84, type II	+	+
ERα_CHIA-PET_0938	chr12	53288664	53289700	9686	NM_002273	3856	KRT8	keratin 8, type II		+
ERα_CHIA-PET_0939	chr12	53319778	53320511	109	NM_001256282	3856	KRT8	keratin 8, type II
ERα_CHIA-PET_0940	chr12	53339038	53340120	-3076	NM_199187	3875	KRT18	keratin 18, type I		+
ERα_CHIA-PET_0941	chr12	53363381	53364484	-20282	NM_001256293	3856	KRT8	keratin 8, type II	+
ERα_CHIA-PET_0942	chr12	53365320	53366474	-22247	NM_001256293	3856	KRT8	keratin 8, type II	+
ERα_CHIA-PET_0943	chr12	53551376	53552323	6428	NM_001244706	51380	CSAD	cysteine sulfinic acid decarboxylase	+
ERα_CHIA-PET_0944	chr12	53568585	53569465	5405	NM_015989	51380	CSAD	cysteine sulfinic acid decarboxylase		+
ERα_CHIA-PET_0945	chr12	54218773	54219658	-68397	NR_104332	102216268	CISTR	chondrogenesis-associated transcript		+
ERα_CHIA-PET_0946	chr12	54220829	54221503	-70348	NR_104332	102216268	CISTR	chondrogenesis-associated transcript
ERα_CHIA-PET_0947	chr12	54261190	54261757	-71103	NM_017410	3229	HOXC13	homeobox C13
ERα_CHIA-PET_0948	chr12	54376781	54377723	-1694	NM_017409	3226	HOXC10	homeobox C10	+
ERα_CHIA-PET_0949	chr12	54431694	54432383	4304	NR_030753	693200	MIR615	microRNA 615	+
ERα_CHIA-PET_0950	chr12	55571374	55571892	-43176	NM_001005280	121364	OR10A7	olfactory receptor, family 10, subfamily A, member 7
ERα_CHIA-PET_0951	chr12	57482304	57483165	57	NM_005967	4665	NAB2	NGFI-A binding protein 2 (EGR1 binding protein 2)
ERα_CHIA-PET_0952	chr12	57495323	57495910	8473	NM_001178079	6778	STAT6	signal transducer and activator of transcription 6, interleukin-4 induced	+
ERα_CHIA-PET_0953	chr12	60273370	60273868	190501	NM_004731	9194	SLC16A7	solute carrier family 16 (monocarboxylate transporter), member 7
ERα_CHIA-PET_0954	chr12	60739011	60739528	656151	NM_004731	9194	SLC16A7	solute carrier family 16 (monocarboxylate transporter), member 7
ERα_CHIA-PET_0955	chr12	64403527	64404317	165381	NM_020762	57522	SRGAP1	SLIT-ROBO Rho GTPase activating protein 1		+
ERα_CHIA-PET_0956	chr12	64412135	64413527	174290	NM_020762	57522	SRGAP1	SLIT-ROBO Rho GTPase activating protein 1	+
ERα_CHIA-PET_0957	chr12	64474149	64475612	141196	NM_152440	144577	C12orf66	chromosome 12 open reading frame 66	+	+
ERα_CHIA-PET_0958	chr12	65004564	65005438	708	NR_040718	283349	RASSF3	Ras association (RalGDS/AF-6) domain family member 3	+
ERα_CHIA-PET_0959	chr12	65018844	65019420	-2747	NR_037515	100500856	MIR548Z	microRNA 548z
ERα_CHIA-PET_0960	chr12	67669372	67669946	6598	NM_018448	55832	CAND1	cullin-associated and neddylation-dissociated 1	+
ERα_CHIA-PET_0961	chr12	67877257	67877836	-36316	NR_103861	100507175	LOC100507175	uncharacterized LOC100507175	+
ERα_CHIA-PET_0962	chr12	69186543	69187560	12223	NR_073494	100130075	LOC100130075	SUZ RNA binding domain containing 1 pseudogene	+
ERα_CHIA-PET_0963	chr12	69197788	69198777	992	NR_073494	100130075	LOC100130075	SUZ RNA binding domain containing 1 pseudogene	+
ERα_CHIA-PET_0964	chr12	75196230	75196971	265049	NM_001136262	552889	ATXN7L3B	ataxin 7-like 3B
ERα_CHIA-PET_0965	chr12	75256030	75256920	324924	NM_001136262	552889	ATXN7L3B	ataxin 7-like 3B	+
ERα_CHIA-PET_0966	chr12	75265122	75266338	334179	NM_001136262	552889	ATXN7L3B	ataxin 7-like 3B	+
ERα_CHIA-PET_0967	chr12	75284676	75285457	318462	NM_153748	3747	KCNC2	potassium channel, voltage gated Shaw related subfamily C, member 2		+
ERα_CHIA-PET_0968	chr12	75556166	75556934	46978	NM_153748	3747	KCNC2	potassium channel, voltage gated Shaw related subfamily C, member 2
ERα_CHIA-PET_0969	chr12	75629738	75630644	-26663	NM_001260498	3747	KCNC2	potassium channel, voltage gated Shaw related subfamily C, member 2	+
ERα_CHIA-PET_0970	chr12	75683005	75683605	40531	NM_001286547	84698	CAPS2	calcyphosine 2
ERα_CHIA-PET_0971	chr12	76032331	76032994	-127244	NM_007043	11103	KRR1	KRR1, small subunit (SSU) processome component, homolog (yeast)	+
ERα_CHIA-PET_0972	chr12	76099633	76100750	-194773	NM_007043	11103	KRR1	KRR1, small subunit (SSU) processome component, homolog (yeast)	+
ERα_CHIA-PET_0973	chr12	79416369	79417223	-22637	NM_001135806	6857	SYT1	synaptotagmin I
ERα_CHIA-PET_0974	chr12	79550526	79551342	111501	NM_001135806	6857	SYT1	synaptotagmin I	+	+
ERα_CHIA-PET_0975	chr12	84138108	84138606	1057423	NM_152588	160335	TMTC2	transmembrane and tetratricopeptide repeat containing 2
ERα_CHIA-PET_0976	chr12	88874758	88875516	99113	NM_000899	4254	KITLG	KIT ligand
ERα_CHIA-PET_0977	chr12	88882772	88883602	91063	NM_000899	4254	KITLG	KIT ligand	+	+
ERα_CHIA-PET_0978	chr12	88973900	88974476	62	NM_000899	4254	KITLG	KIT ligand
ERα_CHIA-PET_0979	chr12	89144128	89145159	-170393	NM_003994	4254	KITLG	KIT ligand	+
ERα_CHIA-PET_0980	chr12	89149745	89150606	-175925	NM_003994	4254	KITLG	KIT ligand	+
ERα_CHIA-PET_0981	chr12	89196515	89197480	216472	NR_038385	728084	LOC728084	uncharacterized LOC728084
ERα_CHIA-PET_0982	chr12	89351647	89352253	61519	NR_038385	728084	LOC728084	uncharacterized LOC728084
ERα_CHIA-PET_0983	chr12	89818516	89819420	-72332	NM_001946	1848	DUSP6	dual specificity phosphatase 6		+
ERα_CHIA-PET_0984	chr12	89858434	89859264	59734	NM_003774	8693	GALNT4	polypeptide N-acetylgalactosaminyltransferase 4	+
ERα_CHIA-PET_0985	chr12	90037964	90038942	11391	NM_001001323	490	ATP2B1	ATPase, Ca++ transporting, plasma membrane 1
ERα_CHIA-PET_0986	chr12	91780975	91781989	-204581	NM_001920	1634	DCN	decorin
ERα_CHIA-PET_0987	chr12	91817127	91817998	-240661	NM_001920	1634	DCN	decorin
ERα_CHIA-PET_0988	chr12	97893868	97894991	8742	NR_031653	100302289	MIR1251	microRNA 1251	+
ERα_CHIA-PET_0989	chr12	97929930	97930794	-27228	NR_029678	406926	MIR135A2	microRNA 135a-2		+
ERα_CHIA-PET_0990	chr12	97949350	97950674	-7578	NR_029678	406926	MIR135A2	microRNA 135a-2
ERα_CHIA-PET_0991	chr12	97961196	97963150	4583	NR_029678	406926	MIR135A2	microRNA 135a-2		+
ERα_CHIA-PET_0992	chr12	98095311	98096350	51546	NR_077241	643711	LOC643711	platelet-activating factor acetylhydrolase 1b, catalytic subunit 2 (30kDa) pseudogene	+
ERα_CHIA-PET_0993	chr12	102009535	102010401	21259	NM_001254721	4604	MYBPC1	myosin binding protein C, slow type
ERα_CHIA-PET_0994	chr12	102090940	102091771	-62	NM_020244	56994	CHPT1	choline phosphotransferase 1	+
ERα_CHIA-PET_0995	chr12	103342481	103343468	-8478	NM_004316	429	ASCL1	achaete-scute family bHLH transcription factor 1	+
ERα_CHIA-PET_0996	chr12	103569111	103570024	23947	NR_126333	101929058	LOC101929058	uncharacterized LOC101929058	+
ERα_CHIA-PET_0997	chr12	103639816	103640778	94677	NR_126333	101929058	LOC101929058	uncharacterized LOC101929058
ERα_CHIA-PET_0998	chr12	103766636	103767396	122772	NM_198521	374470	C12orf42	chromosome 12 open reading frame 42
ERα_CHIA-PET_0999	chr12	103896802	103897874	-7550	NM_001099336	374470	C12orf42	chromosome 12 open reading frame 42	+
ERα_CHIA-PET_1000	chr12	103917930	103919091	-23062	NR_110103	101929084	LOC101929084	uncharacterized LOC101929084	+
ERα_CHIA-PET_1001	chr12	105065662	105066217	80528	NR_037487	100500843	MIR3922	microRNA 3922		+
ERα_CHIA-PET_1002	chr12	105169547	105170241	152578	NM_032148	84102	SLC41A2	solute carrier family 41 (magnesium transporter), member 2	+
ERα_CHIA-PET_1003	chr12	106135268	106136098	35131	NR_110111	101929110	CASC18	cancer susceptibility candidate 18 (non-protein coding)		+
ERα_CHIA-PET_1004	chr12	106254118	106255003	154008	NR_110111	101929110	CASC18	cancer susceptibility candidate 18 (non-protein coding)
ERα_CHIA-PET_1005	chr12	106272780	106273355	172515	NR_110111	101929110	CASC18	cancer susceptibility candidate 18 (non-protein coding)	+
ERα_CHIA-PET_1006	chr12	109553869	109554704	18363	NM_003362	7374	UNG	uracil DNA glycosylase
ERα_CHIA-PET_1007	chr12	110685028	110685547	-33745	NM_001681	488	ATP2A2	ATPase, Ca++ transporting, cardiac muscle, slow twitch 2		+
ERα_CHIA-PET_1008	chr12	115835887	115836759	-714354	NM_005996	6926	TBX3	T-box 3		+
ERα_CHIA-PET_1009	chr12	115864125	115865155	721819	NR_030351	693205	MIR620	microRNA 620
ERα_CHIA-PET_1010	chr12	115881058	115881783	705039	NR_030351	693205	MIR620	microRNA 620		+
ERα_CHIA-PET_1011	chr12	115888494	115889347	697539	NR_030351	693205	MIR620	microRNA 620
ERα_CHIA-PET_1012	chr12	116453198	116454141	132790	NR_030351	693205	MIR620	microRNA 620	+
ERα_CHIA-PET_1013	chr12	116721625	116722202	-6922	NM_015335	23389	MED13L	mediator complex subunit 13-like	+
ERα_CHIA-PET_1014	chr12	116730057	116730605	-15340	NM_015335	23389	MED13L	mediator complex subunit 13-like
ERα_CHIA-PET_1015	chr12	116736608	116737505	-22065	NM_015335	23389	MED13L	mediator complex subunit 13-like	+
ERα_CHIA-PET_1016	chr12	116823743	116824677	41913	NR_039683	100616309	MIR4472-2	microRNA 4472-2
ERα_CHIA-PET_1017	chr12	116827869	116829031	37673	NR_039683	100616309	MIR4472-2	microRNA 4472-2	+	+
ERα_CHIA-PET_1018	chr12	116853662	116854598	11993	NR_039683	100616309	MIR4472-2	microRNA 4472-2	+
ERα_CHIA-PET_1019	chr12	116855258	116856171	10409	NR_039683	100616309	MIR4472-2	microRNA 4472-2	+	+
ERα_CHIA-PET_1020	chr12	116863909	116864697	1820	NR_039683	100616309	MIR4472-2	microRNA 4472-2	+	+
ERα_CHIA-PET_1021	chr12	116865127	116865728	696	NR_039683	100616309	MIR4472-2	microRNA 4472-2
ERα_CHIA-PET_1022	chr12	116931688	116932609	-39079	NR_027345	100287569	LINC00173	long intergenic non-protein coding RNA 173		+
ERα_CHIA-PET_1023	chr12	116932751	116933925	-37889	NR_027345	100287569	LINC00173	long intergenic non-protein coding RNA 173	+
ERα_CHIA-PET_1024	chr12	116940566	116941503	-30193	NR_027345	100287569	LINC00173	long intergenic non-protein coding RNA 173	+
ERα_CHIA-PET_1025	chr12	116972135	116972900	1277	NR_027346	100287569	LINC00173	long intergenic non-protein coding RNA 173	+	+
ERα_CHIA-PET_1026	chr12	119519977	119520704	-96255	NM_014365	26353	HSPB8	heat shock 22kDa protein 8
ERα_CHIA-PET_1027	chr12	119556240	119556739	-60106	NM_014365	26353	HSPB8	heat shock 22kDa protein 8
ERα_CHIA-PET_1028	chr12	119608660	119609705	-7413	NM_014365	26353	HSPB8	heat shock 22kDa protein 8	+	+
ERα_CHIA-PET_1029	chr12	119617218	119618001	1014	NM_014365	26353	HSPB8	heat shock 22kDa protein 8	+
ERα_CHIA-PET_1030	chr12	119917086	119918539	-113452	NM_001136534	387890	TMEM233	transmembrane protein 233
ERα_CHIA-PET_1031	chr12	120501844	120502796	52323	NM_001167606	11021	RAB35	RAB35, member RAS oncogene family	+
ERα_CHIA-PET_1032	chr12	120517156	120518022	37054	NM_001167606	11021	RAB35	RAB35, member RAS oncogene family	+
ERα_CHIA-PET_1033	chr12	121569638	121570492	-557	NR_033953	5027	P2RX7	purinergic receptor P2X, ligand gated ion channel, 7	+
ERα_CHIA-PET_1034	chr12	121613511	121614418	-33700	NM_001261398	5025	P2RX4	purinergic receptor P2X, ligand gated ion channel, 4		+
ERα_CHIA-PET_1035	chr12	121622767	121623526	-24518	NM_001261398	5025	P2RX4	purinergic receptor P2X, ligand gated ion channel, 4	+
ERα_CHIA-PET_1036	chr12	121640540	121641398	-6695	NM_001261398	5025	P2RX4	purinergic receptor P2X, ligand gated ion channel, 4	+
ERα_CHIA-PET_1037	chr12	122140566	122141337	-9707	NM_001080825	144404	TMEM120B	transmembrane protein 120B	+
ERα_CHIA-PET_1038	chr12	122186463	122187486	36316	NM_001080825	144404	TMEM120B	transmembrane protein 120B	+
ERα_CHIA-PET_1039	chr12	122230713	122231592	442	NM_019034	54509	RHOF	ras homolog family member F (in filopodia)	+
ERα_CHIA-PET_1040	chr12	122500381	122501481	-15703	NM_014938	22877	MLXIP	MLX interacting protein	+
ERα_CHIA-PET_1041	chr12	122515898	122516602	-384	NM_014938	22877	MLXIP	MLX interacting protein
ERα_CHIA-PET_1042	chr12	122582497	122583250	66239	NM_014938	22877	MLXIP	MLX interacting protein
ERα_CHIA-PET_1043	chr12	123339419	123339937	19693	NM_003959	9026	HIP1R	huntingtin interacting protein 1 related
ERα_CHIA-PET_1044	chr12	123519086	123519972	-24254	NR_036187	100422931	MIR4304	microRNA 4304
ERα_CHIA-PET_1045	chr12	123544496	123545483	-20942	NR_038290	100507091	LOC100507091	uncharacterized LOC100507091	+
ERα_CHIA-PET_1046	chr12	123547211	123548024	-18314	NR_038290	100507091	LOC100507091	uncharacterized LOC100507091	+
ERα_CHIA-PET_1047	chr12	123553956	123555382	-11262	NR_038290	100507091	LOC100507091	uncharacterized LOC100507091	+
ERα_CHIA-PET_1048	chr12	123579149	123579868	13577	NR_038290	100507091	LOC100507091	uncharacterized LOC100507091
ERα_CHIA-PET_1049	chr12	123590856	123591747	3674	NM_020845	57605	PITPNM2	phosphatidylinositol transfer protein, membrane-associated 2
ERα_CHIA-PET_1050	chr12	124843752	124845238	-22707	NR_106940	102466204	MIR6880	microRNA 6880
ERα_CHIA-PET_1051	chr12	124854290	124855204	-32959	NR_106940	102466204	MIR6880	microRNA 6880
ERα_CHIA-PET_1052	chr12	124877217	124878168	-55904	NR_106940	102466204	MIR6880	microRNA 6880	+
ERα_CHIA-PET_1053	chr12	124878453	124879625	-57251	NR_106940	102466204	MIR6880	microRNA 6880	+	+
ERα_CHIA-PET_1054	chr12	124894860	124895963	-73623	NR_106940	102466204	MIR6880	microRNA 6880
ERα_CHIA-PET_1055	chr12	125093138	125093724	-41421	NM_006312	9612	NCOR2	nuclear receptor corepressor 2	+
ERα_CHIA-PET_1056	chr12	125214952	125215847	133120	NM_001082959	949	SCARB1	scavenger receptor class B, member 1	+
ERα_CHIA-PET_1057	chr12	125230110	125230976	117976	NM_001082959	949	SCARB1	scavenger receptor class B, member 1		+
ERα_CHIA-PET_1058	chr12	125312418	125313434	35593	NM_001082959	949	SCARB1	scavenger receptor class B, member 1	+	+
ERα_CHIA-PET_1059	chr12	125322523	125323379	25568	NM_001082959	949	SCARB1	scavenger receptor class B, member 1
ERα_CHIA-PET_1060	chr12	125331581	125332340	16559	NM_001082959	949	SCARB1	scavenger receptor class B, member 1	+
ERα_CHIA-PET_1061	chr12	125477965	125478659	118	NM_080626	140707	BRI3BP	BRI3 binding protein	+
ERα_CHIA-PET_1062	chr12	125533624	125534549	-15839	NM_023928	65985	AACS	acetoacetyl-CoA synthetase	+
ERα_CHIA-PET_1063	chr12	127650898	127651481	-106247	NR_104646	101927592	LOC101927592	uncharacterized LOC101927592	+
ERα_CHIA-PET_1064	chr12	132345045	132346015	32589	NM_016155	4326	MMP17	matrix metallopeptidase 17 (membrane-inserted)	+
ERα_CHIA-PET_1065	chr12	132356413	132357380	-22383	NM_003565	8408	ULK1	unc-51 like autophagy activating kinase 1		+
ERα_CHIA-PET_1066	chr12	132361563	132362163	-17416	NM_003565	8408	ULK1	unc-51 like autophagy activating kinase 1
ERα_CHIA-PET_1067	chr12	132367552	132368771	-11118	NM_003565	8408	ULK1	unc-51 like autophagy activating kinase 1
ERα_CHIA-PET_1068	chr13	20426133	20426634	11393	NM_001142684	9205	ZMYM5	zinc finger, MYM-type 5
ERα_CHIA-PET_1069	chr13	20595408	20596216	62838	NM_001190965	7750	ZMYM2	zinc finger, MYM-type 2	+
ERα_CHIA-PET_1070	chr13	20617838	20618714	-58564	NR_126380	104355137	LINC01072	long intergenic non-protein coding RNA 1072	+
ERα_CHIA-PET_1071	chr13	22103625	22104228	-70417	NM_001286638	253832	ZDHHC20	zinc finger, DHHC-type containing 20	+
ERα_CHIA-PET_1072	chr13	22114925	22115793	62996	NM_152726	221154	MICU2	mitochondrial calcium uptake 2
ERα_CHIA-PET_1073	chr13	23552928	23553773	-81030	NR_033774	646201	BASP1P1	brain abundant, membrane attached signal protein 1 pseudogene 1
ERα_CHIA-PET_1074	chr13	23570912	23571693	-98982	NR_033774	646201	BASP1P1	brain abundant, membrane attached signal protein 1 pseudogene 1	+
ERα_CHIA-PET_1075	chr13	26233265	26234019	190730	NM_001313741	51761	ATP8A2	ATPase, aminophospholipid transporter, class I, type 8A, member 2
ERα_CHIA-PET_1076	chr13	26303188	26304103	260733	NM_001313741	51761	ATP8A2	ATPase, aminophospholipid transporter, class I, type 8A, member 2
ERα_CHIA-PET_1077	chr13	30594945	30595656	84632	NR_033889	440131	LINC00544	long intergenic non-protein coding RNA 544	+
ERα_CHIA-PET_1078	chr13	30597071	30597952	85501	NR_046998	100874146	LINC00365	long intergenic non-protein coding RNA 365	+
ERα_CHIA-PET_1079	chr13	30646035	30646955	36517	NR_046998	100874146	LINC00365	long intergenic non-protein coding RNA 365		+
ERα_CHIA-PET_1080	chr13	33664618	33665358	74417	NM_004795	9365	KL	klotho
ERα_CHIA-PET_1081	chr13	33693669	33694566	66099	NM_178007	90627	STARD13	StAR-related lipid transfer domain containing 13
ERα_CHIA-PET_1082	chr13	33919537	33920484	-60109	NM_178006	90627	STARD13	StAR-related lipid transfer domain containing 13	+
ERα_CHIA-PET_1083	chr13	39108732	39109683	-32654	NR_046999	100874147	LINC00366	long intergenic non-protein coding RNA 366
ERα_CHIA-PET_1084	chr13	39223811	39224736	36539	NR_126377	101929121	LINC00437	long intergenic non-protein coding RNA 437	+
ERα_CHIA-PET_1085	chr13	39230664	39231509	29726	NR_126377	101929121	LINC00437	long intergenic non-protein coding RNA 437
ERα_CHIA-PET_1086	chr13	39258579	39259534	1756	NR_126377	101929121	LINC00437	long intergenic non-protein coding RNA 437
ERα_CHIA-PET_1087	chr13	39356409	39357309	95686	NM_207361	341640	FREM2	FRAS1 related extracellular matrix protein 2	+
ERα_CHIA-PET_1088	chr13	39424564	39425453	139988	NM_001144033	161003	STOML3	stomatin (EPB72)-like 3
ERα_CHIA-PET_1089	chr13	39464108	39464772	100556	NM_001144033	161003	STOML3	stomatin (EPB72)-like 3	+
ERα_CHIA-PET_1090	chr13	41567629	41568495	-11644	NM_001145353	1997	ELF1	E74-like factor 1 (ets domain transcription factor)		+
ERα_CHIA-PET_1091	chr13	41591106	41591854	2028	NM_172373	1997	ELF1	E74-like factor 1 (ets domain transcription factor)		+
ERα_CHIA-PET_1092	chr13	46694092	46695121	-15395	NM_001872	1361	CPB2	carboxypeptidase B2 (plasma)
ERα_CHIA-PET_1093	chr13	46709128	46710012	-30359	NM_001872	1361	CPB2	carboxypeptidase B2 (plasma)	+	+
ERα_CHIA-PET_1094	chr13	46717007	46717920	-38252	NM_001872	1361	CPB2	carboxypeptidase B2 (plasma)
ERα_CHIA-PET_1095	chr13	50134988	50135758	24346	NM_018191	55213	RCBTB1	regulator of chromosome condensation (RCC1) and BTB (POZ) domain containing protein 1
ERα_CHIA-PET_1096	chr13	50143921	50144828	15345	NM_018191	55213	RCBTB1	regulator of chromosome condensation (RCC1) and BTB (POZ) domain containing protein 1	+
ERα_CHIA-PET_1097	chr13	52480976	52481796	45269	NM_031290	83446	CCDC70	coiled-coil domain containing 70		+
ERα_CHIA-PET_1098	chr13	52493422	52494449	57818	NM_031290	83446	CCDC70	coiled-coil domain containing 70	+
ERα_CHIA-PET_1099	chr13	60300822	60301594	-285644	NR_046539	100874195	DIAPH3-AS1	DIAPH3 antisense RNA 1	+
ERα_CHIA-PET_1100	chr13	60341668	60342512	-244762	NR_046539	100874195	DIAPH3-AS1	DIAPH3 antisense RNA 1	+
ERα_CHIA-PET_1101	chr13	69259899	69261382	198817	NR_038878	338862	LINC00550	long intergenic non-protein coding RNA 550	+	+
ERα_CHIA-PET_1102	chr13	69285484	69286306	173562	NR_038878	338862	LINC00550	long intergenic non-protein coding RNA 550
ERα_CHIA-PET_1103	chr13	69319283	69320393	139619	NR_038878	338862	LINC00550	long intergenic non-protein coding RNA 550	+	+
ERα_CHIA-PET_1104	chr13	73461070	73461568	-105053	NM_014953	22894	DIS3	DIS3 homolog, exosome endoribonuclease and 3'-5' exoribonuclease
ERα_CHIA-PET_1105	chr13	75987954	75988694	67980	NM_001286659	9882	TBC1D4	TBC1 domain family, member 4
ERα_CHIA-PET_1106	chr13	76056059	76056871	-161	NM_001286658	9882	TBC1D4	TBC1 domain family, member 4
ERα_CHIA-PET_1107	chr13	76958719	76959218	501572	NM_138444	115207	KCTD12	potassium channel tetramerization domain containing 12
ERα_CHIA-PET_1108	chr13	82448407	82449108	-647639	NR_047494	100861546	LINC00564	long intergenic non-protein coding RNA 564
ERα_CHIA-PET_1109	chr13	82566331	82566997	-765546	NR_047494	100861546	LINC00564	long intergenic non-protein coding RNA 564
ERα_CHIA-PET_1110	chr13	82664901	82665789	-864227	NR_047494	100861546	LINC00564	long intergenic non-protein coding RNA 564
ERα_CHIA-PET_1111	chr13	82666172	82666757	-865346	NR_047494	100861546	LINC00564	long intergenic non-protein coding RNA 564	+
ERα_CHIA-PET_1112	chr13	82858989	82860468	-1058610	NR_047494	100861546	LINC00564	long intergenic non-protein coding RNA 564		+
ERα_CHIA-PET_1113	chr13	82879372	82880515	-1078825	NR_047494	100861546	LINC00564	long intergenic non-protein coding RNA 564
ERα_CHIA-PET_1114	chr13	92602212	92602711	401999	NR_120382	100873970	GPC5-AS2	GPC5 antisense RNA 2
ERα_CHIA-PET_1115	chr13	93876572	93877337	-2124	NM_005708	10082	GPC6	glypican 6		+
ERα_CHIA-PET_1116	chr13	93886216	93886903	7481	NM_005708	10082	GPC6	glypican 6	+
ERα_CHIA-PET_1117	chr13	97785958	97786925	45435	NR_125725	103625683	LINC00456	long intergenic non-protein coding RNA 456
ERα_CHIA-PET_1118	chr13	97831822	97832531	-300	NR_125725	103625683	LINC00456	long intergenic non-protein coding RNA 456	+	+
ERα_CHIA-PET_1119	chr13	98925088	98926342	64937	NR_036129	100422881	MIR3170	microRNA 3170	+	+
ERα_CHIA-PET_1120	chr13	98945037	98946508	84994	NR_036129	100422881	MIR3170	microRNA 3170
ERα_CHIA-PET_1121	chr13	98947434	98948114	86996	NR_036129	100422881	MIR3170	microRNA 3170
ERα_CHIA-PET_1122	chr13	98949705	98950775	89462	NR_036129	100422881	MIR3170	microRNA 3170
ERα_CHIA-PET_1123	chr13	99068438	99069415	105453	NM_003576	8428	STK24	serine/threonine kinase 24
ERα_CHIA-PET_1124	chr13	99071641	99072932	102093	NM_003576	8428	STK24	serine/threonine kinase 24	+
ERα_CHIA-PET_1125	chr13	99136529	99137758	37236	NM_003576	8428	STK24	serine/threonine kinase 24	+
ERα_CHIA-PET_1126	chr13	99158847	99159591	15160	NM_003576	8428	STK24	serine/threonine kinase 24	+
ERα_CHIA-PET_1127	chr13	99302052	99303235	-73238	NM_001032296	8428	STK24	serine/threonine kinase 24		+
ERα_CHIA-PET_1128	chr13	99311495	99312403	-82544	NM_001032296	8428	STK24	serine/threonine kinase 24	+
ERα_CHIA-PET_1129	chr13	99358697	99359645	45758	NM_005073	6564	SLC15A1	solute carrier family 15 (oligopeptide transporter), member 1
ERα_CHIA-PET_1130	chr13	100605453	100606000	3693	NR_120421	101927437	LOC101927437	uncharacterized LOC101927437		+
ERα_CHIA-PET_1131	chr13	100614143	100615064	-5184	NR_120421	101927437	LOC101927437	uncharacterized LOC101927437		+
ERα_CHIA-PET_1132	chr13	104328425	104329232	251278	NR_126374	104326190	LINC01309	long intergenic non-protein coding RNA 1309
ERα_CHIA-PET_1133	chr13	104356245	104356837	278991	NR_126374	104326190	LINC01309	long intergenic non-protein coding RNA 1309	+
ERα_CHIA-PET_1134	chr13	104382442	104383564	305453	NR_126374	104326190	LINC01309	long intergenic non-protein coding RNA 1309
ERα_CHIA-PET_1135	chr13	104450990	104451917	373903	NR_126374	104326190	LINC01309	long intergenic non-protein coding RNA 1309	+
ERα_CHIA-PET_1136	chr13	107401879	107402806	96114	NR_047026	100874173	LINC00443	long intergenic non-protein coding RNA 443
ERα_CHIA-PET_1137	chr13	107405356	107406234	99567	NR_047026	100874173	LINC00443	long intergenic non-protein coding RNA 443
ERα_CHIA-PET_1138	chr13	107513167	107514294	207502	NR_047026	100874173	LINC00443	long intergenic non-protein coding RNA 443	+
ERα_CHIA-PET_1139	chr13	109571283	109572456	247782	NR_047700	100885782	MYO16-AS1	MYO16 antisense RNA 1	+
ERα_CHIA-PET_1140	chr13	109607292	109607837	212087	NR_047700	100885782	MYO16-AS1	MYO16 antisense RNA 1	+	+
ERα_CHIA-PET_1141	chr13	109612817	109613383	206551	NR_047700	100885782	MYO16-AS1	MYO16 antisense RNA 1
ERα_CHIA-PET_1142	chr13	109678666	109679592	140522	NR_047700	100885782	MYO16-AS1	MYO16 antisense RNA 1	+
ERα_CHIA-PET_1143	chr13	109773752	109774704	45423	NR_047700	100885782	MYO16-AS1	MYO16 antisense RNA 1
ERα_CHIA-PET_1144	chr13	110161730	110162506	109075	NR_126361	104326054	LINC00399	long intergenic non-protein coding RNA 399
ERα_CHIA-PET_1145	chr13	110228260	110229219	-151882	NR_103846	101409253	LINC00676	long intergenic non-protein coding RNA 676	+
ERα_CHIA-PET_1146	chr13	110357239	110357853	-23075	NR_103846	101409253	LINC00676	long intergenic non-protein coding RNA 676	+
ERα_CHIA-PET_1147	chr13	110521074	110521899	-82572	NM_003749	8660	IRS2	insulin receptor substrate 2
ERα_CHIA-PET_1148	chr13	110651074	110651611	-54290	NR_126387	104355146	LINC00396	long intergenic non-protein coding RNA 396
ERα_CHIA-PET_1149	chr13	110652390	110652948	-52963	NR_126387	104355146	LINC00396	long intergenic non-protein coding RNA 396	+
ERα_CHIA-PET_1150	chr13	112308572	112309331	-238741	NR_046992	101928616	LINC00354	long intergenic non-protein coding RNA 354		+
ERα_CHIA-PET_1151	chr13	113255468	113256416	-13443	NM_001286277	10426	TUBGCP3	tubulin, gamma complex associated protein 3		+
ERα_CHIA-PET_1152	chr13	113270587	113271715	-28652	NM_001286277	10426	TUBGCP3	tubulin, gamma complex associated protein 3	+
ERα_CHIA-PET_1153	chr13	113324294	113324921	-20036	NM_032189	23250	ATP11A	ATPase, class VI, type 11A	+
ERα_CHIA-PET_1154	chr13	113376962	113377881	31624	NR_046661	100874205	ATP11A-AS1	ATP11A antisense RNA 1	+
ERα_CHIA-PET_1155	chr13	113415814	113416867	-7295	NR_109811	100874205	ATP11A-AS1	ATP11A antisense RNA 1	+	+
ERα_CHIA-PET_1156	chr13	113567429	113568484	54996	NR_034002	100289410	MCF2L-AS1	MCF2L antisense RNA 1	+
ERα_CHIA-PET_1157	chr13	113595012	113595563	27665	NR_034002	100289410	MCF2L-AS1	MCF2L antisense RNA 1
ERα_CHIA-PET_1158	chr13	113605894	113606898	16556	NR_034002	100289410	MCF2L-AS1	MCF2L antisense RNA 1	+
ERα_CHIA-PET_1159	chr13	113622769	113623877	-212	NM_001112732	23263	MCF2L	MCF.2 cell line derived transforming sequence like
ERα_CHIA-PET_1160	chr13	113639617	113640630	-15905	NM_024979	23263	MCF2L	MCF.2 cell line derived transforming sequence like
ERα_CHIA-PET_1161	chr13	113655595	113656395	-33	NM_024979	23263	MCF2L	MCF.2 cell line derived transforming sequence like
ERα_CHIA-PET_1162	chr13	113667502	113668352	11899	NM_024979	23263	MCF2L	MCF.2 cell line derived transforming sequence like
ERα_CHIA-PET_1163	chr13	113979935	113980543	-25749	NR_046541	100874068	GRTP1-AS1	GRTP1 antisense RNA 1	+
ERα_CHIA-PET_1164	chr13	114065631	114066316	2735	NM_001304433	101928841	LOC101928841	collagen alpha-1(II) chain-like	+
ERα_CHIA-PET_1165	chr13	114536474	114537073	18190	NR_044995	650669	GAS6-AS1	GAS6 antisense RNA 1	+
ERα_CHIA-PET_1166	chr13	114566448	114567486	109	NM_000820	2621	GAS6	growth arrest-specific 6	+
ERα_CHIA-PET_1167	chr13	114631365	114632457	53	NR_047495	100861555	LINC00565	long intergenic non-protein coding RNA 565	+
ERα_CHIA-PET_1168	chr14	22632564	22633124	425299	NM_001344	1603	DAD1	defender against cell death 1	+
ERα_CHIA-PET_1169	chr14	24109377	24110280	4255	NM_005794	10202	DHRS2	dehydrogenase/reductase (SDR family) member 2
ERα_CHIA-PET_1170	chr14	24116128	24116793	10887	NM_005794	10202	DHRS2	dehydrogenase/reductase (SDR family) member 2	+
ERα_CHIA-PET_1171	chr14	24134292	24135255	29200	NM_005794	10202	DHRS2	dehydrogenase/reductase (SDR family) member 2	+
ERα_CHIA-PET_1172	chr14	29708015	29708533	466334	NR_039672	100616347	MIR548AI	microRNA 548ai
ERα_CHIA-PET_1173	chr14	32776962	32777923	-21037	NM_004274	9472	AKAP6	A kinase (PRKA) anchor protein 6
ERα_CHIA-PET_1174	chr14	32978542	32979269	180426	NM_004274	9472	AKAP6	A kinase (PRKA) anchor protein 6	+	+
ERα_CHIA-PET_1175	chr14	34085030	34085928	-92664	NR_132771	106635522	SNORA89	small nucleolar RNA, H/ACA box 89
ERα_CHIA-PET_1176	chr14	34250269	34251193	72588	NR_132771	106635522	SNORA89	small nucleolar RNA, H/ACA box 89	+
ERα_CHIA-PET_1177	chr14	35800589	35801696	39619	NM_002791	5687	PSMA6	proteasome subunit alpha 6	+
ERα_CHIA-PET_1178	chr14	35805579	35806437	44485	NM_002791	5687	PSMA6	proteasome subunit alpha 6		+
ERα_CHIA-PET_1179	chr14	35809809	35810609	48686	NM_002791	5687	PSMA6	proteasome subunit alpha 6
ERα_CHIA-PET_1180	chr14	35872840	35873621	730	NM_020529	4792	NFKBIA	nuclear factor of kappa light polypeptide gene enhancer in B-cells inhibitor, alpha	+	+
ERα_CHIA-PET_1181	chr14	37670965	37671524	4126	NM_001195296	145282	MIPOL1	mirror-image polydactyly 1	+
ERα_CHIA-PET_1182	chr14	37682929	37683529	16111	NM_001195296	145282	MIPOL1	mirror-image polydactyly 1
ERα_CHIA-PET_1183	chr14	38015767	38016748	48068	NM_004496	3169	FOXA1	forkhead box A1
ERα_CHIA-PET_1184	chr14	38035595	38036608	28224	NM_004496	3169	FOXA1	forkhead box A1		+
ERα_CHIA-PET_1185	chr14	38044073	38045012	19783	NM_004496	3169	FOXA1	forkhead box A1
ERα_CHIA-PET_1186	chr14	38052527	38053371	11376	NM_004496	3169	FOXA1	forkhead box A1
ERα_CHIA-PET_1187	chr14	38056947	38057588	7058	NM_004496	3169	FOXA1	forkhead box A1	+
ERα_CHIA-PET_1188	chr14	38064683	38065639	757	NM_001310135	319089	TTC6	tetratricopeptide repeat domain 6	+
ERα_CHIA-PET_1189	chr14	41285691	41286269	-137936	NR_109758	644919	LOC644919	uncharacterized LOC644919	+
ERα_CHIA-PET_1190	chr14	41792595	41793113	-283910	NM_152447	145581	LRFN5	leucine rich repeat and fibronectin type III domain containing 5
ERα_CHIA-PET_1191	chr14	41888682	41889346	-187750	NM_152447	145581	LRFN5	leucine rich repeat and fibronectin type III domain containing 5
ERα_CHIA-PET_1192	chr14	50459205	50460270	115	NR_126499	283551	LINC01588	long intergenic non-protein coding RNA 1588
ERα_CHIA-PET_1193	chr14	50467818	50468379	5139	NR_126496	283551	LINC01588	long intergenic non-protein coding RNA 1588
ERα_CHIA-PET_1194	chr14	50470103	50471638	2367	NR_126496	283551	LINC01588	long intergenic non-protein coding RNA 1588
ERα_CHIA-PET_1195	chr14	50473867	50474641	-16	NR_126498	283551	LINC01588	long intergenic non-protein coding RNA 1588
ERα_CHIA-PET_1196	chr14	50484670	50485752	-10973	NR_126498	283551	LINC01588	long intergenic non-protein coding RNA 1588	+
ERα_CHIA-PET_1197	chr14	50506513	50507181	-32609	NR_126498	283551	LINC01588	long intergenic non-protein coding RNA 1588
ERα_CHIA-PET_1198	chr14	50511688	50512193	-37702	NR_126498	283551	LINC01588	long intergenic non-protein coding RNA 1588
ERα_CHIA-PET_1199	chr14	51342925	51343481	4325	NM_001206673	145447	ABHD12B	abhydrolase domain containing 12B
ERα_CHIA-PET_1200	chr14	51377214	51378189	33547	NM_002863	5836	PYGL	phosphorylase, glycogen, liver
ERα_CHIA-PET_1201	chr14	51390724	51391450	20161	NM_002863	5836	PYGL	phosphorylase, glycogen, liver
ERα_CHIA-PET_1202	chr14	51431191	51431787	-20241	NM_001163940	5836	PYGL	phosphorylase, glycogen, liver
ERα_CHIA-PET_1203	chr14	53313553	53314129	-55455	NM_198066	64841	GNPNAT1	glucosamine-phosphate N-acetyltransferase 1	+
ERα_CHIA-PET_1204	chr14	53367132	53367658	50420	NM_001134999	10979	FERMT2	fermitin family member 2
ERα_CHIA-PET_1205	chr14	55738557	55739114	-37	NM_152231	55030	FBXO34	F-box protein 34	+
ERα_CHIA-PET_1206	chr14	55768025	55768553	29417	NM_152231	55030	FBXO34	F-box protein 34	+
ERα_CHIA-PET_1207	chr14	57944496	57945486	15590	NM_001283056	55195	C14orf105	chromosome 14 open reading frame 105
ERα_CHIA-PET_1208	chr14	57947852	57948916	12197	NM_001283056	55195	C14orf105	chromosome 14 open reading frame 105		+
ERα_CHIA-PET_1209	chr14	57950360	57950928	9937	NM_001283056	55195	C14orf105	chromosome 14 open reading frame 105
ERα_CHIA-PET_1210	chr14	57967355	57968391	-7292	NM_001283057	55195	C14orf105	chromosome 14 open reading frame 105
ERα_CHIA-PET_1211	chr14	59721172	59721874	-8636	NM_014992	23002	DAAM1	dishevelled associated activator of morphogenesis 1
ERα_CHIA-PET_1212	chr14	59744509	59745399	14795	NM_014992	23002	DAAM1	dishevelled associated activator of morphogenesis 1
ERα_CHIA-PET_1213	chr14	59827849	59828649	98090	NM_014992	23002	DAAM1	dishevelled associated activator of morphogenesis 1	+
ERα_CHIA-PET_1214	chr14	59894581	59895287	37125	NM_022571	64582	GPR135	G protein-coupled receptor 135	+
ERα_CHIA-PET_1215	chr14	61951544	61952485	84898	NR_110417	101927780	LOC101927780	uncharacterized LOC101927780
ERα_CHIA-PET_1216	chr14	61982094	61982743	54494	NR_110417	101927780	LOC101927780	uncharacterized LOC101927780
ERα_CHIA-PET_1217	chr14	62025653	62026607	10782	NR_110417	101927780	LOC101927780	uncharacterized LOC101927780	+	+
ERα_CHIA-PET_1218	chr14	64682393	64683248	148	NM_182910	23224	SYNE2	spectrin repeat containing, nuclear envelope 2
ERα_CHIA-PET_1219	chr14	64701377	64702283	19158	NM_182910	23224	SYNE2	spectrin repeat containing, nuclear envelope 2	+
ERα_CHIA-PET_1220	chr14	64765043	64765931	-4359	NM_001040275	2100	ESR2	estrogen receptor 2 (ER beta)	+
ERα_CHIA-PET_1221	chr14	65283736	65284423	5787	NM_000347	6710	SPTB	spectrin, beta, erythrocytic	+
ERα_CHIA-PET_1222	chr14	65519615	65520411	8607	NR_039855	100616490	MIR4706	microRNA 4706	+
ERα_CHIA-PET_1223	chr14	65576979	65577806	-7979	NR_073137	4149	MAX	MYC associated factor X	+
ERα_CHIA-PET_1224	chr14	65584827	65585837	-15919	NR_073137	4149	MAX	MYC associated factor X	+
ERα_CHIA-PET_1225	chr14	65593536	65594392	-24551	NR_073137	4149	MAX	MYC associated factor X		+
ERα_CHIA-PET_1226	chr14	65787407	65788348	14024	NR_039857	100616176	MIR4708	microRNA 4708
ERα_CHIA-PET_1227	chr14	67908931	67909688	-30481	NM_016445	26499	PLEK2	pleckstrin 2
ERα_CHIA-PET_1228	chr14	67912559	67913704	-34303	NM_016445	26499	PLEK2	pleckstrin 2	+
ERα_CHIA-PET_1229	chr14	67919475	67920342	-41080	NM_016445	26499	PLEK2	pleckstrin 2	+
ERα_CHIA-PET_1230	chr14	67946464	67947472	35053	NM_182526	161145	TMEM229B	transmembrane protein 229B	+
ERα_CHIA-PET_1231	chr14	67969457	67970025	12280	NM_182526	161145	TMEM229B	transmembrane protein 229B
ERα_CHIA-PET_1232	chr14	68000090	68001028	551	NM_020715	57475	PLEKHH1	pleckstrin homology domain containing, family H (with MyTH4 domain) member 1
ERα_CHIA-PET_1233	chr14	68644132	68645028	358084	NM_002877	5890	RAD51B	RAD51 paralog B
ERα_CHIA-PET_1234	chr14	68722670	68723243	436460	NM_002877	5890	RAD51B	RAD51 paralog B
ERα_CHIA-PET_1235	chr14	68773162	68774112	486994	NM_001244698	677	ZFP36L1	ZFP36 ring finger protein-like 1
ERα_CHIA-PET_1236	chr14	68775997	68776757	484254	NM_001244698	677	ZFP36L1	ZFP36 ring finger protein-like 1		+
ERα_CHIA-PET_1237	chr14	68860029	68860970	400132	NM_001244698	677	ZFP36L1	ZFP36 ring finger protein-like 1	+
ERα_CHIA-PET_1238	chr14	68870991	68872016	389128	NM_001244698	677	ZFP36L1	ZFP36 ring finger protein-like 1		+
ERα_CHIA-PET_1239	chr14	68925386	68926509	334684	NM_001244698	677	ZFP36L1	ZFP36 ring finger protein-like 1
ERα_CHIA-PET_1240	chr14	68935106	68936558	324799	NM_001244698	677	ZFP36L1	ZFP36 ring finger protein-like 1		+
ERα_CHIA-PET_1241	chr14	68939922	68940583	320379	NM_001244698	677	ZFP36L1	ZFP36 ring finger protein-like 1
ERα_CHIA-PET_1242	chr14	69006235	69007064	253982	NM_001244698	677	ZFP36L1	ZFP36 ring finger protein-like 1
ERα_CHIA-PET_1243	chr14	69020495	69021399	239684	NM_001244698	677	ZFP36L1	ZFP36 ring finger protein-like 1		+
ERα_CHIA-PET_1244	chr14	69036390	69037482	223695	NM_001244698	677	ZFP36L1	ZFP36 ring finger protein-like 1	+
ERα_CHIA-PET_1245	chr14	69391009	69391868	54645	NM_001130004	87	ACTN1	actinin, alpha 1	+
ERα_CHIA-PET_1246	chr14	69412644	69413278	33122	NM_001130004	87	ACTN1	actinin, alpha 1	+	+
ERα_CHIA-PET_1247	chr14	71414784	71415566	41053	NM_014982	22990	PCNX	pecanex homolog (Drosophila)	+
ERα_CHIA-PET_1248	chr14	72947112	72947630	-36157	NR_106994	102465832	MIR7843	microRNA 7843		+
ERα_CHIA-PET_1249	chr14	73391453	73392394	-1117	NM_181340	26094	DCAF4	DDB1 and CUL4 associated factor 4	+
ERα_CHIA-PET_1250	chr14	74068341	74069429	10475	NM_152331	122970	ACOT4	acyl-CoA thioesterase 4	+
ERα_CHIA-PET_1251	chr14	74100221	74101094	-10921	NM_001201366	83544	DNAL1	dynein, axonemal, light chain 1	+	+
ERα_CHIA-PET_1252	chr14	74222772	74223909	-2110	NR_039727	100616158	MIR4505	microRNA 4505	+	+
ERα_CHIA-PET_1253	chr14	74242040	74242936	11473	NM_001043318	91748	ELMSAN1	ELM2 and Myb/SANT-like domain containing 1
ERα_CHIA-PET_1254	chr14	74248940	74249977	4503	NM_001043318	91748	ELMSAN1	ELM2 and Myb/SANT-like domain containing 1	+
ERα_CHIA-PET_1255	chr14	74251143	74252492	2144	NM_001043318	91748	ELMSAN1	ELM2 and Myb/SANT-like domain containing 1		+
ERα_CHIA-PET_1256	chr14	75388780	75389415	48	NM_031464	83694	RPS6KL1	ribosomal protein S6 kinase-like 1	+
ERα_CHIA-PET_1257	chr14	75441867	75442686	-19809	NM_001207012	5228	PGF	placental growth factor	+
ERα_CHIA-PET_1258	chr14	75726507	75727447	-18504	NM_005252	2353	FOS	FBJ murine osteosarcoma viral oncogene homolog	+
ERα_CHIA-PET_1259	chr14	75741727	75742644	-3296	NM_005252	2353	FOS	FBJ murine osteosarcoma viral oncogene homolog	+
ERα_CHIA-PET_1260	chr14	75743748	75744354	-1430	NM_005252	2353	FOS	FBJ murine osteosarcoma viral oncogene homolog
ERα_CHIA-PET_1261	chr14	75749713	75750318	4534	NM_005252	2353	FOS	FBJ murine osteosarcoma viral oncogene homolog
ERα_CHIA-PET_1262	chr14	75987317	75988461	-895	NM_006399	10538	BATF	basic leucine zipper transcription factor, ATF-like		+
ERα_CHIA-PET_1263	chr14	76001942	76003148	13761	NM_006399	10538	BATF	basic leucine zipper transcription factor, ATF-like
ERα_CHIA-PET_1264	chr14	76028114	76029175	-16296	NM_017791	55640	FLVCR2	feline leukemia virus subgroup C cellular receptor family, member 2
ERα_CHIA-PET_1265	chr14	76101148	76101906	26011	NM_007176	11161	C14orf1	chromosome 14 open reading frame 1
ERα_CHIA-PET_1266	chr14	76658453	76658952	38005	NR_110314	55668	GPATCH2L	G-patch domain containing 2 like
ERα_CHIA-PET_1267	chr14	77117760	77118641	-110035	NM_014909	22846	VASH1	vasohibin 1	+	+
ERα_CHIA-PET_1268	chr14	77168623	77169429	-59209	NM_014909	22846	VASH1	vasohibin 1
ERα_CHIA-PET_1269	chr14	77610969	77611796	-3248	NM_174976	283576	ZDHHC22	zinc finger, DHHC-type containing 22	+
ERα_CHIA-PET_1270	chr14	77784079	77785078	2647	NM_013382	29954	POMT2	protein-O-mannosyltransferase 2	+
ERα_CHIA-PET_1271	chr14	77840499	77841430	2432	NM_213601	283578	TMED8	transmembrane p24 trafficking protein family member 8
ERα_CHIA-PET_1272	chr14	77866120	77867241	22719	NM_001113475	122945	NOXRED1	NADP-dependent oxidoreductase domain containing 1	+
ERα_CHIA-PET_1273	chr14	79121885	79122384	252060	NM_004796	9369	NRXN3	neurexin 3
ERα_CHIA-PET_1274	chr14	79879668	79880179	134241	NM_001272020	9369	NRXN3	neurexin 3
ERα_CHIA-PET_1275	chr14	79981326	79981914	235938	NM_001272020	9369	NRXN3	neurexin 3	+	+
ERα_CHIA-PET_1276	chr14	81691777	81692400	-4513	NM_201595	2957	GTF2A1	general transcription factor IIA 1	+
ERα_CHIA-PET_1277	chr14	81703766	81704509	-16562	NM_201595	2957	GTF2A1	general transcription factor IIA 1	+
ERα_CHIA-PET_1278	chr14	85196108	85196606	-663866	NR_102737	100996280	LINC00911	long intergenic non-protein coding RNA 911
ERα_CHIA-PET_1279	chr14	88476692	88477749	5752	NM_003608	8477	GPR65	G protein-coupled receptor 65	+
ERα_CHIA-PET_1280	chr14	88510725	88511967	-18690	NR_110121	101928791	LOC101928791	uncharacterized LOC101928791		+
ERα_CHIA-PET_1281	chr14	90757815	90758593	35310	NM_002802	5700	PSMC1	proteasome 26S subunit, ATPase 1
ERα_CHIA-PET_1282	chr14	90910078	90910761	-11155	NR_033986	400238	LINC00642	long intergenic non-protein coding RNA 642	+
ERα_CHIA-PET_1283	chr14	90969496	90970770	48559	NR_033986	400238	LINC00642	long intergenic non-protein coding RNA 642	+	+
ERα_CHIA-PET_1284	chr14	90978311	90979684	57423	NR_033986	400238	LINC00642	long intergenic non-protein coding RNA 642	+	+
ERα_CHIA-PET_1285	chr14	91205642	91206160	76860	NM_001010854	145567	TTC7B	tetratricopeptide repeat domain 7B		+
ERα_CHIA-PET_1286	chr14	91742495	91743114	-22580	NM_003485	8111	GPR68	G protein-coupled receptor 68	+
ERα_CHIA-PET_1287	chr14	91757047	91758013	-37306	NM_003485	8111	GPR68	G protein-coupled receptor 68
ERα_CHIA-PET_1288	chr14	91792245	91793029	-72413	NM_003485	8111	GPR68	G protein-coupled receptor 68	+
ERα_CHIA-PET_1289	chr14	91838893	91839685	44899	NM_001080414	440193	CCDC88C	coiled-coil domain containing 88C
ERα_CHIA-PET_1290	chr14	91859174	91860046	24578	NM_001080414	440193	CCDC88C	coiled-coil domain containing 88C
ERα_CHIA-PET_1291	chr14	91860358	91861264	23377	NM_001080414	440193	CCDC88C	coiled-coil domain containing 88C	+
ERα_CHIA-PET_1292	chr14	91884125	91885192	-470	NM_001080414	440193	CCDC88C	coiled-coil domain containing 88C	+
ERα_CHIA-PET_1293	chr14	92395871	92396369	17926	NM_006329	10516	FBLN5	fibulin 5
ERα_CHIA-PET_1294	chr14	93412351	93412975	23218	NM_001301690	1113	CHGA	chromogranin A
ERα_CHIA-PET_1295	chr14	93429729	93430944	40891	NM_001301690	1113	CHGA	chromogranin A
ERα_CHIA-PET_1296	chr14	93439707	93441102	50959	NM_001301690	1113	CHGA	chromogranin A	+
ERα_CHIA-PET_1297	chr14	93447906	93448582	58799	NM_001301690	1113	CHGA	chromogranin A	+	+
ERα_CHIA-PET_1298	chr14	93451036	93451996	62071	NM_001301690	1113	CHGA	chromogranin A	+
ERα_CHIA-PET_1299	chr14	93454144	93455041	65147	NM_001301690	1113	CHGA	chromogranin A	+	+
ERα_CHIA-PET_1300	chr14	93471237	93472267	-62045	NR_002808	319085	ITPK1-AS1	ITPK1 antisense RNA 1	+
ERα_CHIA-PET_1301	chr14	93473745	93474470	-59690	NR_002808	319085	ITPK1-AS1	ITPK1 antisense RNA 1
ERα_CHIA-PET_1302	chr14	93477678	93478625	-55646	NR_002808	319085	ITPK1-AS1	ITPK1 antisense RNA 1
ERα_CHIA-PET_1303	chr14	93483341	93484821	-49716	NR_002808	319085	ITPK1-AS1	ITPK1 antisense RNA 1	+
ERα_CHIA-PET_1304	chr14	93498548	93500092	-34477	NR_002808	319085	ITPK1-AS1	ITPK1 antisense RNA 1	+	+
ERα_CHIA-PET_1305	chr14	93505617	93506417	-27780	NR_002808	319085	ITPK1-AS1	ITPK1 antisense RNA 1
ERα_CHIA-PET_1306	chr14	93508987	93510503	-24052	NR_002808	319085	ITPK1-AS1	ITPK1 antisense RNA 1	+
ERα_CHIA-PET_1307	chr14	93510838	93512934	-21911	NR_002808	319085	ITPK1-AS1	ITPK1 antisense RNA 1	+
ERα_CHIA-PET_1308	chr14	93523140	93523710	-10372	NR_002808	319085	ITPK1-AS1	ITPK1 antisense RNA 1
ERα_CHIA-PET_1309	chr14	93601299	93602207	-19490	NM_001142593	3705	ITPK1	inositol-tetrakisphosphate 1-kinase
ERα_CHIA-PET_1310	chr14	93618443	93619257	32399	NM_022151	64112	MOAP1	modulator of apoptosis 1	+
ERα_CHIA-PET_1311	chr14	94787350	94788339	1844	NM_001756	866	SERPINA6	serpin peptidase inhibitor, clade A (alpha-1 antiproteinase, antitrypsin), member 6	+
ERα_CHIA-PET_1312	chr14	94800909	94801809	-11671	NM_001756	866	SERPINA6	serpin peptidase inhibitor, clade A (alpha-1 antiproteinase, antitrypsin), member 6	+	+
ERα_CHIA-PET_1313	chr14	94856773	94857686	-200	NM_001127706	5265	SERPINA1	serpin peptidase inhibitor, clade A (alpha-1 antiproteinase, antitrypsin), member 1		+
ERα_CHIA-PET_1314	chr14	95513103	95513794	86392	NM_001195573	23405	DICER1	dicer 1, ribonuclease type III
ERα_CHIA-PET_1315	chr14	95522585	95523407	76844	NM_001195573	23405	DICER1	dicer 1, ribonuclease type III
ERα_CHIA-PET_1316	chr14	95534229	95535154	65149	NM_001195573	23405	DICER1	dicer 1, ribonuclease type III
ERα_CHIA-PET_1317	chr14	95538331	95538975	61187	NM_001195573	23405	DICER1	dicer 1, ribonuclease type III
ERα_CHIA-PET_1318	chr14	95627629	95628554	-3744	NM_030621	23405	DICER1	dicer 1, ribonuclease type III
ERα_CHIA-PET_1319	chr14	95806022	95807158	10669	NR_110127	101929080	LOC101929080	uncharacterized LOC101929080	+	+
ERα_CHIA-PET_1320	chr14	95831179	95831748	35542	NR_110127	101929080	LOC101929080	uncharacterized LOC101929080	+
ERα_CHIA-PET_1321	chr14	95911333	95911863	30575	NM_152592	161176	SYNE3	spectrin repeat containing, nuclear envelope family member 3		+
ERα_CHIA-PET_1322	chr14	95996513	95997537	2941	NR_003002	677768	SCARNA13	small Cajal body-specific RNA 13		+
ERα_CHIA-PET_1323	chr14	96082789	96083623	-34309	NR_028288	27004	TCL6	T-cell leukemia/lymphoma 6 (non-protein coding)	+
ERα_CHIA-PET_1324	chr14	96099926	96100854	-17125	NR_028288	27004	TCL6	T-cell leukemia/lymphoma 6 (non-protein coding)	+
ERα_CHIA-PET_1325	chr14	96571121	96571646	65722	NM_001282463	56967	C14orf132	chromosome 14 open reading frame 132
ERα_CHIA-PET_1326	chr14	96572041	96573098	66908	NM_001282463	56967	C14orf132	chromosome 14 open reading frame 132
ERα_CHIA-PET_1327	chr14	96588680	96589503	-82044	NM_000623	624	BDKRB2	bradykinin receptor B2	+	+
ERα_CHIA-PET_1328	chr14	96690458	96691292	19740	NM_000623	624	BDKRB2	bradykinin receptor B2
ERα_CHIA-PET_1329	chr14	96729964	96730809	7839	NM_000710	623	BDKRB1	bradykinin receptor B1
ERα_CHIA-PET_1330	chr14	97040400	97042090	72043	NM_001293628	10914	PAPOLA	poly(A) polymerase alpha	+
ERα_CHIA-PET_1331	chr14	97047310	97047841	78373	NM_001293628	10914	PAPOLA	poly(A) polymerase alpha
ERα_CHIA-PET_1332	chr14	97100548	97101489	131816	NM_001293628	10914	PAPOLA	poly(A) polymerase alpha
ERα_CHIA-PET_1333	chr14	97838077	97838971	-86629	NR_110165	101929241	LOC101929241	uncharacterized LOC101929241	+
ERα_CHIA-PET_1334	chr14	97877764	97878627	-46958	NR_110165	101929241	LOC101929241	uncharacterized LOC101929241		+
ERα_CHIA-PET_1335	chr14	97966060	97967067	41410	NR_110166	101929241	LOC101929241	uncharacterized LOC101929241		+
ERα_CHIA-PET_1336	chr14	99272602	99273601	95151	NM_182560	283598	C14orf177	chromosome 14 open reading frame 177
ERα_CHIA-PET_1337	chr14	99292564	99293161	114912	NM_182560	283598	C14orf177	chromosome 14 open reading frame 177
ERα_CHIA-PET_1338	chr14	99357289	99358224	179806	NM_182560	283598	C14orf177	chromosome 14 open reading frame 177	+
ERα_CHIA-PET_1339	chr14	99369508	99370546	192077	NM_182560	283598	C14orf177	chromosome 14 open reading frame 177	+
ERα_CHIA-PET_1340	chr14	99375525	99376075	197850	NM_182560	283598	C14orf177	chromosome 14 open reading frame 177
ERα_CHIA-PET_1341	chr14	99450270	99451122	272746	NM_182560	283598	C14orf177	chromosome 14 open reading frame 177	+
ERα_CHIA-PET_1342	chr14	99603514	99604012	134287	NM_138576	64919	BCL11B	B-cell CLL/lymphoma 11B (zinc finger protein)
ERα_CHIA-PET_1343	chr14	99673681	99674504	63958	NM_138576	64919	BCL11B	B-cell CLL/lymphoma 11B (zinc finger protein)
ERα_CHIA-PET_1344	chr14	100478381	100479328	-52897	NM_016337	51466	EVL	Enah/Vasp-like
ERα_CHIA-PET_1345	chr14	100491389	100491961	-40076	NM_016337	51466	EVL	Enah/Vasp-like	+	+
ERα_CHIA-PET_1346	chr14	100562406	100563680	12808	NR_039601	100616247	MIR151B	microRNA 151b	+
ERα_CHIA-PET_1347	chr14	100573030	100573866	2403	NR_039601	100616247	MIR151B	microRNA 151b	+	+
ERα_CHIA-PET_1348	chr14	100603178	100604208	22319	NM_206918	123099	DEGS2	delta(4)-desaturase, sphingolipid 2	+
ERα_CHIA-PET_1349	chr14	100637019	100637753	-11374	NM_206918	123099	DEGS2	delta(4)-desaturase, sphingolipid 2	+
ERα_CHIA-PET_1350	chr14	100658638	100659652	-33133	NM_206918	123099	DEGS2	delta(4)-desaturase, sphingolipid 2	+
ERα_CHIA-PET_1351	chr14	101283530	101284622	3248	NR_039729	100616495	MIR2392	microRNA 2392
ERα_CHIA-PET_1352	chr14	101295480	101296427	3484	NR_003531	55384	MEG3	maternally expressed 3 (non-protein coding)
ERα_CHIA-PET_1353	chr14	104092571	104093219	-2630	NM_005552	3831	KLC1	kinesin light chain 1	+	+
ERα_CHIA-PET_1354	chr14	104159265	104160582	21900	NM_001100118	7517	XRCC3	X-ray repair complementing defective repair in Chinese hamster cells 3
ERα_CHIA-PET_1355	chr14	104177066	104177616	4482	NM_001100118	7517	XRCC3	X-ray repair complementing defective repair in Chinese hamster cells 3
ERα_CHIA-PET_1356	chr14	104203369	104204044	21625	NM_024071	79038	ZFYVE21	zinc finger, FYVE domain containing 21	+
ERα_CHIA-PET_1357	chr14	104396352	104397254	1986	NM_153046	122402	TDRD9	tudor domain containing 9	+
ERα_CHIA-PET_1358	chr14	104654766	104655392	50019	NM_015656	26153	KIF26A	kinesin family member 26A
ERα_CHIA-PET_1359	chr14	104812529	104813058	207733	NM_015656	26153	KIF26A	kinesin family member 26A
ERα_CHIA-PET_1360	chr14	106090602	106091214	3455	NR_107059	102466889	MIR8071-2	microRNA 8071-2	+
ERα_CHIA-PET_1361	chr14	106134449	106134964	4438	NR_046211	2003	ELK2AP	ELK2A, member of ETS oncogene family, pseudogene	+
ERα_CHIA-PET_1362	chr14	107161177	107161734	68739	NR_106988	102465753	MIR7641-2	microRNA 7641-2
ERα_CHIA-PET_1363	chr15	22908079	22908612	15696	NM_014608	23191	CYFIP1	cytoplasmic FMR1 interacting protein 1	+
ERα_CHIA-PET_1364	chr15	22917699	22918229	25315	NM_014608	23191	CYFIP1	cytoplasmic FMR1 interacting protein 1	+
ERα_CHIA-PET_1365	chr15	27846421	27846949	-440219	NR_120343	101928869	GABRG3-AS1	GABRG3 antisense RNA 1
ERα_CHIA-PET_1366	chr15	28000231	28000733	343976	NM_001300984	4948	OCA2	oculocutaneous albinism II	+
ERα_CHIA-PET_1367	chr15	33359745	33360823	-51	NM_001103184	342184	FMN1	formin 1	+	+
ERα_CHIA-PET_1368	chr15	33375467	33376496	-15748	NM_001103184	342184	FMN1	formin 1	+	+
ERα_CHIA-PET_1369	chr15	38885390	38886263	-28819	NM_001128602	10125	RASGRP1	RAS guanyl releasing protein 1 (calcium and DAG-regulated)	+	+
ERα_CHIA-PET_1370	chr15	39826322	39827146	-46546	NM_003246	7057	THBS1	thrombospondin 1	+
ERα_CHIA-PET_1371	chr15	39888270	39889233	15471	NM_003246	7057	THBS1	thrombospondin 1
ERα_CHIA-PET_1372	chr15	39916811	39917704	43977	NM_003246	7057	THBS1	thrombospondin 1		+
ERα_CHIA-PET_1373	chr15	39920058	39920589	47043	NM_003246	7057	THBS1	thrombospondin 1
ERα_CHIA-PET_1374	chr15	39921579	39922481	48750	NM_003246	7057	THBS1	thrombospondin 1		+
ERα_CHIA-PET_1375	chr15	39960412	39961308	87580	NM_003246	7057	THBS1	thrombospondin 1	+
ERα_CHIA-PET_1376	chr15	40337122	40337630	5864	NR_040059	100131089	SRP14-AS1	SRP14 antisense RNA1 (head to head)		+
ERα_CHIA-PET_1377	chr15	40347338	40347926	16120	NR_040059	100131089	SRP14-AS1	SRP14 antisense RNA1 (head to head)	+	+
ERα_CHIA-PET_1378	chr15	40662908	40663770	-11583	NM_001142761	90417	KNSTRN	kinetochore-localized astrin/SPAG5 binding protein	+
ERα_CHIA-PET_1379	chr15	40713314	40714091	16016	NM_002225	3712	IVD	isovaleryl-CoA dehydrogenase	+
ERα_CHIA-PET_1380	chr15	42358523	42359496	-16108	NM_001206670	123745	PLA2G4E	phospholipase A2, group IVE	+
ERα_CHIA-PET_1381	chr15	42376230	42377794	9740	NM_178034	283748	PLA2G4D	phospholipase A2, group IVD (cytosolic)		+
ERα_CHIA-PET_1382	chr15	44213977	44214926	-44082	NR_003571	728758	PIN4P1	protein (peptidylprolyl cis/trans isomerase) NIMA-interacting, 4 pseudogene 1		+
ERα_CHIA-PET_1383	chr15	44267262	44268168	-97346	NR_003571	728758	PIN4P1	protein (peptidylprolyl cis/trans isomerase) NIMA-interacting, 4 pseudogene 1		+
ERα_CHIA-PET_1384	chr15	47809858	47810576	-200469	NM_020858	80031	SEMA6D	sema domain, transmembrane domain (TM), and cytoplasmic domain, (semaphorin) 6D	+	+
ERα_CHIA-PET_1385	chr15	47915951	47916876	-94273	NM_020858	80031	SEMA6D	sema domain, transmembrane domain (TM), and cytoplasmic domain, (semaphorin) 6D		+
ERα_CHIA-PET_1386	chr15	50793702	50794335	44884	NM_203494	373509	USP50	ubiquitin specific peptidase 50
ERα_CHIA-PET_1387	chr15	50982660	50983185	-3910	NM_017672	54822	TRPM7	transient receptor potential cation channel, subfamily M, member 7	+
ERα_CHIA-PET_1388	chr15	51056917	51057558	673	NM_032802	84888	SPPL2A	signal peptide peptidase like 2A	+
ERα_CHIA-PET_1389	chr15	51070115	51070977	-12636	NM_032802	84888	SPPL2A	signal peptide peptidase like 2A
ERα_CHIA-PET_1390	chr15	51146938	51147497	-53652	NM_007347	23431	AP4E1	adaptor-related protein complex 4, epsilon 1 subunit
ERα_CHIA-PET_1391	chr15	53146328	53147396	-64653	NM_004498	3175	ONECUT1	one cut homeobox 1	+	+
ERα_CHIA-PET_1392	chr15	53363983	53364531	-282048	NM_004498	3175	ONECUT1	one cut homeobox 1
ERα_CHIA-PET_1393	chr15	53623503	53624538	209029	NR_102336	256764	WDR72	WD repeat domain 72	+
ERα_CHIA-PET_1394	chr15	53729893	53730882	102662	NR_102336	256764	WDR72	WD repeat domain 72
ERα_CHIA-PET_1395	chr15	55649663	55650212	15295	NR_030358	693213	MIR628	microRNA 628	+
ERα_CHIA-PET_1396	chr15	57883469	57884028	-354	NM_152451	100820829	MYZAP	myocardial zonula adherens protein	+
ERα_CHIA-PET_1397	chr15	60030503	60031096	-49157	NM_004330	663	BNIP2	BCL2/adenovirus E1B 19kDa interacting protein 2		+
ERα_CHIA-PET_1398	chr15	60685263	60685790	4659	NM_001002858	302	ANXA2	annexin A2
ERα_CHIA-PET_1399	chr15	62007311	62007851	345083	NM_020821	54832	VPS13C	vacuolar protein sorting 13 homolog C (S. cerevisiae)
ERα_CHIA-PET_1400	chr15	62042590	62043158	309790	NM_020821	54832	VPS13C	vacuolar protein sorting 13 homolog C (S. cerevisiae)	+
ERα_CHIA-PET_1401	chr15	63077810	63078784	-37859	NR_029709	406965	MIR190A	microRNA 190a	+
ERα_CHIA-PET_1402	chr15	63092440	63093307	-23283	NR_029709	406965	MIR190A	microRNA 190a	+
ERα_CHIA-PET_1403	chr15	63123936	63125696	8660	NR_029709	406965	MIR190A	microRNA 190a	+
ERα_CHIA-PET_1404	chr15	63137145	63138542	21687	NR_029709	406965	MIR190A	microRNA 190a
ERα_CHIA-PET_1405	chr15	63188815	63189805	73154	NR_029709	406965	MIR190A	microRNA 190a
ERα_CHIA-PET_1406	chr15	63258953	63260149	-75287	NM_001018007	7168	TPM1	tropomyosin 1 (alpha)	+
ERα_CHIA-PET_1407	chr15	63270246	63270819	-64306	NM_001018007	7168	TPM1	tropomyosin 1 (alpha)	+
ERα_CHIA-PET_1408	chr15	63286815	63287856	-47503	NM_001018007	7168	TPM1	tropomyosin 1 (alpha)	+
ERα_CHIA-PET_1409	chr15	63311684	63312487	-22753	NM_001018007	7168	TPM1	tropomyosin 1 (alpha)
ERα_CHIA-PET_1410	chr15	64188722	64189934	-26110	NR_029944	494334	MIR422A	microRNA 422a	+
ERα_CHIA-PET_1411	chr15	64237651	64238498	17601	NR_120344	101928988	LOC101928988	uncharacterized LOC101928988
ERα_CHIA-PET_1412	chr15	64338370	64339347	-337	NM_014326	23604	DAPK2	death-associated protein kinase 2
ERα_CHIA-PET_1413	chr15	64813858	64815066	22843	NM_015042	23060	ZNF609	zinc finger protein 609
ERα_CHIA-PET_1414	chr15	64915729	64916995	79118	NM_001301302	4947	OAZ2	ornithine decarboxylase antizyme 2		+
ERα_CHIA-PET_1415	chr15	67407742	67408270	-10048	NM_001145102	4088	SMAD3	SMAD family member 3
ERα_CHIA-PET_1416	chr15	67417993	67418561	223	NM_001145102	4088	SMAD3	SMAD family member 3
ERα_CHIA-PET_1417	chr15	67442200	67443020	12251	NM_001145103	4088	SMAD3	SMAD family member 3
ERα_CHIA-PET_1418	chr15	67463621	67464506	5570	NM_001145104	4088	SMAD3	SMAD family member 3
ERα_CHIA-PET_1419	chr15	67854214	67855013	13271	NM_001206804	5607	MAP2K5	mitogen-activated protein kinase kinase 5
ERα_CHIA-PET_1420	chr15	70308178	70308933	63252	NR_030714	693214	MIR629	microRNA 629
ERα_CHIA-PET_1421	chr15	70321357	70322173	50042	NR_030714	693214	MIR629	microRNA 629	+
ERα_CHIA-PET_1422	chr15	70490056	70490882	-100213	NM_005078	7090	TLE3	transducin-like enhancer of split 3
ERα_CHIA-PET_1423	chr15	70573900	70574762	-184075	NM_005078	7090	TLE3	transducin-like enhancer of split 3	+
ERα_CHIA-PET_1424	chr15	70600214	70601232	-210467	NM_005078	7090	TLE3	transducin-like enhancer of split 3
ERα_CHIA-PET_1425	chr15	70613172	70614258	-223459	NM_005078	7090	TLE3	transducin-like enhancer of split 3	+
ERα_CHIA-PET_1426	chr15	70616171	70616774	-226216	NM_005078	7090	TLE3	transducin-like enhancer of split 3
ERα_CHIA-PET_1427	chr15	70670183	70671194	-237198	NR_126481	104548972	SALRNA3	senescence associated long non-coding RNA 3	+	+
ERα_CHIA-PET_1428	chr15	70677027	70677710	-230518	NR_126481	104548972	SALRNA3	senescence associated long non-coding RNA 3		+
ERα_CHIA-PET_1429	chr15	70755033	70756114	-152313	NR_126481	104548972	SALRNA3	senescence associated long non-coding RNA 3		+
ERα_CHIA-PET_1430	chr15	70844136	70844896	-63370	NR_126481	104548972	SALRNA3	senescence associated long non-coding RNA 3	+
ERα_CHIA-PET_1431	chr15	71363294	71363868	44258	NM_001102658	196993	CT62	cancer/testis antigen 62
ERα_CHIA-PET_1432	chr15	71371328	71372070	36140	NM_001102658	196993	CT62	cancer/testis antigen 62
ERα_CHIA-PET_1433	chr15	71375917	71376881	31440	NM_001102658	196993	CT62	cancer/testis antigen 62	+
ERα_CHIA-PET_1434	chr15	71388631	71389706	18671	NM_001102658	196993	CT62	cancer/testis antigen 62	+
ERα_CHIA-PET_1435	chr15	71396685	71397768	10613	NM_001102658	196993	CT62	cancer/testis antigen 62	+	+
ERα_CHIA-PET_1436	chr15	71406185	71407332	1081	NM_001102658	196993	CT62	cancer/testis antigen 62
ERα_CHIA-PET_1437	chr15	71412629	71413160	-5055	NM_001102658	196993	CT62	cancer/testis antigen 62	+
ERα_CHIA-PET_1438	chr15	71421704	71422773	-11550	NM_024817	79875	THSD4	thrombospondin type 1 domain containing 4
ERα_CHIA-PET_1439	chr15	71586508	71587100	-105406	NR_120350	101929196	THSD4-AS1	THSD4 antisense RNA 1	+
ERα_CHIA-PET_1440	chr15	73783489	73784303	48397	NM_001042367	283677	REC114	REC114 meiotic recombination protein	+
ERα_CHIA-PET_1441	chr15	73987850	73988819	11712	NM_001024736	80381	CD276	CD276 molecule	+
ERα_CHIA-PET_1442	chr15	74002112	74003145	26006	NM_001024736	80381	CD276	CD276 molecule	+
ERα_CHIA-PET_1443	chr15	74012041	74012601	31495	NM_001039614	388135	C15orf59	chromosome 15 open reading frame 59
ERα_CHIA-PET_1444	chr15	74032698	74033601	10667	NM_001039614	388135	C15orf59	chromosome 15 open reading frame 59	+
ERα_CHIA-PET_1445	chr15	74035050	74036007	8288	NM_001039614	388135	C15orf59	chromosome 15 open reading frame 59
ERα_CHIA-PET_1446	chr15	74073253	74074228	13185	NR_120352	101929221	C15orf59-AS1	C15orf59 antisense RNA 1	+	+
ERα_CHIA-PET_1447	chr15	74088674	74089439	28501	NR_120352	101929221	C15orf59-AS1	C15orf59 antisense RNA 1	+
ERα_CHIA-PET_1448	chr15	74098858	74099446	38597	NR_120352	101929221	C15orf59-AS1	C15orf59 antisense RNA 1
ERα_CHIA-PET_1449	chr15	74206095	74206877	-12303	NM_005576	4016	LOXL1	lysyl oxidase-like 1	+
ERα_CHIA-PET_1450	chr15	74232562	74233376	-12380	NR_040069	100287616	LOXL1-AS1	LOXL1 antisense RNA 1
ERα_CHIA-PET_1451	chr15	74243507	74244060	-23194	NR_040069	100287616	LOXL1-AS1	LOXL1 antisense RNA 1
ERα_CHIA-PET_1452	chr15	74316887	74317629	30244	NM_033250	5371	PML	promyelocytic leukemia	+
ERα_CHIA-PET_1453	chr15	75062934	75063974	-10971	NM_001127190	1445	CSK	c-src tyrosine kinase	+
ERα_CHIA-PET_1454	chr15	75081067	75082080	-475	NR_039738	100616183	MIR4513	microRNA 4513	+
ERα_CHIA-PET_1455	chr15	75109405	75110485	4751	NM_021819	79748	LMAN1L	lectin, mannose-binding, 1 like	+
ERα_CHIA-PET_1456	chr15	75134856	75135663	293	NM_001284365	25989	ULK3	unc-51 like kinase 3		+
ERα_CHIA-PET_1457	chr15	75139543	75140351	-4395	NR_104309	25989	ULK3	unc-51 like kinase 3	+
ERα_CHIA-PET_1458	chr15	75229609	75230565	408	NM_004255	9377	COX5A	cytochrome c oxidase subunit Va
ERα_CHIA-PET_1459	chr15	79462915	79463423	-38961	NR_029705	406960	MIR184	microRNA 184
ERα_CHIA-PET_1460	chr15	79471150	79471914	-30598	NR_029705	406960	MIR184	microRNA 184	+	+
ERα_CHIA-PET_1461	chr15	83611457	83612030	9733	NM_199330	9455	HOMER2	homer scaffolding protein 2
ERα_CHIA-PET_1462	chr15	83620707	83621230	508	NM_199330	9455	HOMER2	homer scaffolding protein 2	+
ERα_CHIA-PET_1463	chr15	84364537	84365345	42103	NM_207517	57188	ADAMTSL3	ADAMTS like 3	+	+
ERα_CHIA-PET_1464	chr15	84422294	84423054	99836	NM_207517	57188	ADAMTSL3	ADAMTS like 3		+
ERα_CHIA-PET_1465	chr15	86548261	86548759	111438	NR_120368	101929701	LINC01584	long intergenic non-protein coding RNA 1584
ERα_CHIA-PET_1466	chr15	87399136	87399678	-539208	NR_046012	727915	AGBL1-AS1	AGBL1 antisense RNA 1
ERα_CHIA-PET_1467	chr15	87407574	87408255	-547715	NR_046012	727915	AGBL1-AS1	AGBL1 antisense RNA 1
ERα_CHIA-PET_1468	chr15	89658501	89659378	27558	NM_007011	11057	ABHD2	abhydrolase domain containing 2	+
ERα_CHIA-PET_1469	chr15	89662951	89663466	31827	NM_007011	11057	ABHD2	abhydrolase domain containing 2		+
ERα_CHIA-PET_1470	chr15	89664358	89665207	33401	NM_007011	11057	ABHD2	abhydrolase domain containing 2
ERα_CHIA-PET_1471	chr15	89668475	89669328	37520	NM_007011	11057	ABHD2	abhydrolase domain containing 2		+
ERα_CHIA-PET_1472	chr15	89672727	89673467	41716	NM_007011	11057	ABHD2	abhydrolase domain containing 2	+
ERα_CHIA-PET_1473	chr15	89682147	89683186	51285	NM_007011	11057	ABHD2	abhydrolase domain containing 2		+
ERα_CHIA-PET_1474	chr15	89984198	89985224	55133	NR_110261	51458	RHCG	Rh family, C glycoprotein	+
ERα_CHIA-PET_1475	chr15	89993412	89994413	45932	NR_110261	51458	RHCG	Rh family, C glycoprotein	+
ERα_CHIA-PET_1476	chr15	90275991	90276489	18300	NM_018670	55897	MESP1	mesoderm posterior bHLH transcription factor 1
ERα_CHIA-PET_1477	chr15	90306677	90307461	-12520	NM_001039958	145873	MESP2	mesoderm posterior bHLH transcription factor 2	+	+
ERα_CHIA-PET_1478	chr15	90309809	90310742	-9314	NM_001039958	145873	MESP2	mesoderm posterior bHLH transcription factor 2	+
ERα_CHIA-PET_1479	chr15	90325307	90325911	6020	NM_001039958	145873	MESP2	mesoderm posterior bHLH transcription factor 2	+	+
ERα_CHIA-PET_1480	chr15	90360906	90361730	-3246	NM_001150	290	ANPEP	alanyl (membrane) aminopeptidase
ERα_CHIA-PET_1481	chr15	90370885	90372288	-13514	NM_001150	290	ANPEP	alanyl (membrane) aminopeptidase	+
ERα_CHIA-PET_1482	chr15	90380204	90381213	13245	NR_049817	100847059	MIR5094	microRNA 5094
ERα_CHIA-PET_1483	chr15	93157402	93157921	41370	NM_207446	400451	FAM174B	family with sequence similarity 174, member B	+
ERα_CHIA-PET_1484	chr15	93175129	93175659	23637	NM_207446	400451	FAM174B	family with sequence similarity 174, member B
ERα_CHIA-PET_1485	chr15	93180408	93181087	18284	NM_207446	400451	FAM174B	family with sequence similarity 174, member B
ERα_CHIA-PET_1486	chr15	93187913	93188540	10805	NM_207446	400451	FAM174B	family with sequence similarity 174, member B
ERα_CHIA-PET_1487	chr15	93188555	93189446	10031	NM_207446	400451	FAM174B	family with sequence similarity 174, member B	+	+
ERα_CHIA-PET_1488	chr15	93288944	93289870	-49307	NR_033769	728619	ASB9P1	ankyrin repeat and SOCS box containing 9 pseudogene 1	+	+
ERα_CHIA-PET_1489	chr15	94572499	94573303	78266	NR_120320	101927112	LINC01581	long intergenic non-protein coding RNA 1581	+
ERα_CHIA-PET_1490	chr15	94621018	94621584	29866	NR_120320	101927112	LINC01581	long intergenic non-protein coding RNA 1581	+	+
ERα_CHIA-PET_1491	chr15	96315978	96316660	339997	NR_027133	145820	LINC00924	long intergenic non-protein coding RNA 924
ERα_CHIA-PET_1492	chr15	96326281	96327104	350370	NR_027133	145820	LINC00924	long intergenic non-protein coding RNA 924	+
ERα_CHIA-PET_1493	chr15	96418344	96419306	442503	NR_027133	145820	LINC00924	long intergenic non-protein coding RNA 924
ERα_CHIA-PET_1494	chr15	96437312	96439403	-430800	NM_001145155	7026	NR2F2	nuclear receptor subfamily 2, group F, member 2	+	+
ERα_CHIA-PET_1495	chr15	96454571	96455517	-414113	NM_001145155	7026	NR2F2	nuclear receptor subfamily 2, group F, member 2
ERα_CHIA-PET_1496	chr15	96646262	96646925	-222564	NM_001145155	7026	NR2F2	nuclear receptor subfamily 2, group F, member 2	+
ERα_CHIA-PET_1497	chr15	96879702	96880759	3661	NM_001145157	7026	NR2F2	nuclear receptor subfamily 2, group F, member 2	+
ERα_CHIA-PET_1498	chr15	99212496	99213163	-18379	NR_126453	104472848	IRAIN	IGF1R antisense imprinted non-protein coding RNA	+
ERα_CHIA-PET_1499	chr15	99291998	99293110	-35101	NR_039864	100616432	MIR4714	microRNA 4714	+
ERα_CHIA-PET_1500	chr15	99301589	99302121	-25800	NR_039864	100616432	MIR4714	microRNA 4714
ERα_CHIA-PET_1501	chr15	99306239	99307247	-20912	NR_039864	100616432	MIR4714	microRNA 4714		+
ERα_CHIA-PET_1502	chr15	101707741	101708952	83791	NM_014918	22856	CHSY1	chondroitin sulfate synthase 1	+
ERα_CHIA-PET_1503	chr15	101774238	101774978	17529	NM_014918	22856	CHSY1	chondroitin sulfate synthase 1	+
ERα_CHIA-PET_1504	chr15	101788431	101789443	3200	NM_014918	22856	CHSY1	chondroitin sulfate synthase 1	+
ERα_CHIA-PET_1505	chr16	366449	367511	33862	NM_006849	64714	PDIA2	protein disulfide isomerase family A, member 2	+
ERα_CHIA-PET_1506	chr16	376748	377804	25400	NM_003502	8312	AXIN1	axin 1		+
ERα_CHIA-PET_1507	chr16	502350	502868	-22241	NM_001142272	9727	RAB11FIP3	RAB11 family interacting protein 3 (class II)
ERα_CHIA-PET_1508	chr16	637781	638757	-1088	NM_001172663	57799	RAB40C	RAB40C, member RAS oncogene family	+
ERα_CHIA-PET_1509	chr16	691434	692354	45	NM_138418	84331	FAM195A	family with sequence similarity 195, member A	+
ERα_CHIA-PET_1510	chr16	692724	693288	1157	NM_138418	84331	FAM195A	family with sequence similarity 195, member A
ERα_CHIA-PET_1511	chr16	701390	702167	2415	NM_145294	197335	WDR90	WD repeat domain 90	+
ERα_CHIA-PET_1512	chr16	803233	804137	-7080	NM_005823	10232	MSLN	mesothelin	+
ERα_CHIA-PET_1513	chr16	1151321	1151913	-5373	NM_207419	390664	C1QTNF8	C1q and tumor necrosis factor related protein 8	+	+
ERα_CHIA-PET_1514	chr16	1337322	1338661	-21163	NM_194260	7329	UBE2I	ubiquitin conjugating enzyme E2I	+
ERα_CHIA-PET_1515	chr16	1346642	1347606	-12030	NM_194260	7329	UBE2I	ubiquitin conjugating enzyme E2I
ERα_CHIA-PET_1516	chr16	1428631	1429452	643	NM_001193389	64718	UNKL	unkempt family zinc finger-like
ERα_CHIA-PET_1517	chr16	1464788	1465399	-372	NM_001037125	64718	UNKL	unkempt family zinc finger-like	+
ERα_CHIA-PET_1518	chr16	1623054	1623909	38628	NM_014714	9742	IFT140	intraflagellar transport 140
ERα_CHIA-PET_1519	chr16	1680449	1681381	16274	NM_020825	57585	CRAMP1	cramped chromatin regulator homolog 1
ERα_CHIA-PET_1520	chr16	2379411	2380185	10949	NM_001089	21	ABCA3	ATP binding cassette subfamily A member 3	+
ERα_CHIA-PET_1521	chr16	2389452	2390125	959	NM_001089	21	ABCA3	ATP binding cassette subfamily A member 3
ERα_CHIA-PET_1522	chr16	2768861	2769798	1223	NM_031948	83886	PRSS27	protease, serine 27
ERα_CHIA-PET_1523	chr16	2794459	2795271	-67	NR_027274	100128788	SRRM2-AS1	SRRM2 antisense RNA 1	+
ERα_CHIA-PET_1524	chr16	2896195	2897070	-3880	NR_026864	124221	PRSS30P	protease, serine, 30, pseudogene	+
ERα_CHIA-PET_1525	chr16	2962087	2962591	359	NM_032296	84256	FLYWCH1	FLYWCH-type zinc finger 1	+
ERα_CHIA-PET_1526	chr16	4117396	4117924	48526	NM_001116	115	ADCY9	adenylate cyclase 9
ERα_CHIA-PET_1527	chr16	4163199	4163962	2606	NM_001116	115	ADCY9	adenylate cyclase 9	+
ERα_CHIA-PET_1528	chr16	4191904	4193047	-26289	NM_001116	115	ADCY9	adenylate cyclase 9	+
ERα_CHIA-PET_1529	chr16	4201978	4202996	-36301	NM_001116	115	ADCY9	adenylate cyclase 9	+
ERα_CHIA-PET_1530	chr16	4226477	4227402	-60753	NM_001116	115	ADCY9	adenylate cyclase 9
ERα_CHIA-PET_1531	chr16	4418689	4419793	-2608	NM_138440	114990	VASN	vasorin
ERα_CHIA-PET_1532	chr16	4421203	4421720	-388	NM_138440	114990	VASN	vasorin	+
ERα_CHIA-PET_1533	chr16	4430291	4431115	8854	NM_138440	114990	VASN	vasorin
ERα_CHIA-PET_1534	chr16	4666112	4667013	-1635	NM_145253	124402	UBALD1	UBA-like domain containing 1	+
ERα_CHIA-PET_1535	chr16	4995217	4996026	-8485	NM_002705	5493	PPL	periplakin
ERα_CHIA-PET_1536	chr16	5007494	5008440	-351	NM_014692	9717	SEC14L5	SEC14-like lipid binding 5
ERα_CHIA-PET_1537	chr16	8772803	8773743	4829	NM_020686	18	ABAT	4-aminobutyrate aminotransferase	+
ERα_CHIA-PET_1538	chr16	8880305	8881068	10819	NM_015421	25880	TMEM186	transmembrane protein 186	+
ERα_CHIA-PET_1539	chr16	9141224	9142016	-43917	NM_014117	29035	C16orf72	chromosome 16 open reading frame 72	+
ERα_CHIA-PET_1540	chr16	11221415	11222111	128276	NM_003745	8651	SOCS1	suppressor of cytokine signaling 1
ERα_CHIA-PET_1541	chr16	11249233	11249935	100455	NM_003745	8651	SOCS1	suppressor of cytokine signaling 1
ERα_CHIA-PET_1542	chr16	11256833	11257396	92925	NM_003745	8651	SOCS1	suppressor of cytokine signaling 1
ERα_CHIA-PET_1543	chr16	11277030	11277661	72694	NM_003745	8651	SOCS1	suppressor of cytokine signaling 1	+
ERα_CHIA-PET_1544	chr16	11550866	11551384	-7991	NR_110907	101927131	LOC101927131	uncharacterized LOC101927131
ERα_CHIA-PET_1545	chr16	12118159	12118838	47907	NM_032167	92017	SNX29	sorting nexin 29		+
ERα_CHIA-PET_1546	chr16	12130479	12131347	60322	NM_032167	92017	SNX29	sorting nexin 29
ERα_CHIA-PET_1547	chr16	14428481	14429444	25820	NR_029854	100126355	MIR365A	microRNA 365a		+
ERα_CHIA-PET_1548	chr16	14463789	14464698	-120	NR_131191	105447648	LOC105447648	uncharacterized LOC105447648	+	+
ERα_CHIA-PET_1549	chr16	15081996	15083009	13682	NM_001285449	23042	PDXDC1	pyridoxal-dependent decarboxylase domain containing 1	+
ERα_CHIA-PET_1550	chr16	15090677	15091252	22144	NM_001285449	23042	PDXDC1	pyridoxal-dependent decarboxylase domain containing 1
ERα_CHIA-PET_1551	chr16	15582973	15583897	-12688	NM_001142469	89927	C16orf45	chromosome 16 open reading frame 45		+
ERα_CHIA-PET_1552	chr16	16195189	16196072	121698	NM_001079528	368	ABCC6	ATP binding cassette subfamily C member 6	+
ERα_CHIA-PET_1553	chr16	16221213	16222123	95660	NM_001079528	368	ABCC6	ATP binding cassette subfamily C member 6	+
ERα_CHIA-PET_1554	chr16	16955350	16956019	482582	NM_001282507	101059938	NPIPA7	nuclear pore complex interacting protein family, member A7
ERα_CHIA-PET_1555	chr16	16956286	16956934	483508	NM_001282507	101059938	NPIPA7	nuclear pore complex interacting protein family, member A7
ERα_CHIA-PET_1556	chr16	17067595	17068335	496773	NM_022166	64131	XYLT1	xylosyltransferase I	+
ERα_CHIA-PET_1557	chr16	19910421	19911138	-13823	NM_001304771	51704	GPRC5B	G protein-coupled receptor, class C, group 5, member B	+
ERα_CHIA-PET_1558	chr16	19999050	20000035	85558	NM_001002911	124274	GPR139	G protein-coupled receptor 139	+
ERα_CHIA-PET_1559	chr16	20025140	20026017	59522	NM_001002911	124274	GPR139	G protein-coupled receptor 139
ERα_CHIA-PET_1560	chr16	20311528	20312352	27002	NM_001502	2813	GP2	glycoprotein 2 (zymogen granule membrane)
ERα_CHIA-PET_1561	chr16	20685176	20685736	17122	NM_052956	116285	ACSM1	acyl-CoA synthetase medium-chain family member 1	+
ERα_CHIA-PET_1562	chr16	20730198	20731054	22660	NM_001304550	55623	THUMPD1	THUMP domain containing 1	+
ERα_CHIA-PET_1563	chr16	20892285	20892878	-18609	NM_020424	57149	LYRM1	LYR motif containing 1	+
ERα_CHIA-PET_1564	chr16	20912585	20913171	452	NM_001302835	57149	LYRM1	LYR motif containing 1	+	+
ERα_CHIA-PET_1565	chr16	21522661	21523262	-5505	NR_037451	100500917	MIR3680-1	microRNA 3680-1	+
ERα_CHIA-PET_1566	chr16	23087397	23088299	72743	NM_020718	57478	USP31	ubiquitin specific peptidase 31	+
ERα_CHIA-PET_1567	chr16	23090201	23091688	69647	NM_020718	57478	USP31	ubiquitin specific peptidase 31	+
ERα_CHIA-PET_1568	chr16	23130805	23131585	29396	NM_020718	57478	USP31	ubiquitin specific peptidase 31
ERα_CHIA-PET_1569	chr16	23148887	23149914	11191	NM_020718	57478	USP31	ubiquitin specific peptidase 31	+
ERα_CHIA-PET_1570	chr16	23159414	23160547	611	NM_020718	57478	USP31	ubiquitin specific peptidase 31
ERα_CHIA-PET_1571	chr16	23161182	23161890	-945	NM_020718	57478	USP31	ubiquitin specific peptidase 31
ERα_CHIA-PET_1572	chr16	23164006	23164961	-3892	NM_020718	57478	USP31	ubiquitin specific peptidase 31	+
ERα_CHIA-PET_1573	chr16	23278623	23279391	-34584	NM_000336	6338	SCNN1B	sodium channel, non voltage gated 1 beta subunit	+	+
ERα_CHIA-PET_1574	chr16	23373759	23374587	60582	NM_000336	6338	SCNN1B	sodium channel, non voltage gated 1 beta subunit
ERα_CHIA-PET_1575	chr16	23385897	23386850	72782	NM_000336	6338	SCNN1B	sodium channel, non voltage gated 1 beta subunit	+
ERα_CHIA-PET_1576	chr16	23392312	23393320	71696	NM_153603	91949	COG7	component of oligomeric golgi complex 7	+
ERα_CHIA-PET_1577	chr16	23512449	23512951	9115	NM_015044	23062	GGA2	golgi-associated, gamma adaptin ear containing, ARF binding protein 2
ERα_CHIA-PET_1578	chr16	23551218	23552276	16949	NR_003501	124454	EARS2	glutamyl-tRNA synthetase 2, mitochondrial	+
ERα_CHIA-PET_1579	chr16	27909059	27909568	-9835	NM_144675	146395	GSG1L	GSG1-like	+
ERα_CHIA-PET_1580	chr16	29270600	29271582	-42517	NR_002939	440352	SNX29P2	sorting nexin 29 pseudogene 2
ERα_CHIA-PET_1581	chr16	29301859	29302803	-11277	NR_002939	440352	SNX29P2	sorting nexin 29 pseudogene 2	+
ERα_CHIA-PET_1582	chr16	29321759	29322894	8718	NR_002939	440352	SNX29P2	sorting nexin 29 pseudogene 2
ERα_CHIA-PET_1583	chr16	33950587	33951554	11433	NR_038368	649159	LINC00273	long intergenic non-protein coding RNA 273	+	+
ERα_CHIA-PET_1584	chr16	33955998	33957194	5907	NR_038368	649159	LINC00273	long intergenic non-protein coding RNA 273	+	+
ERα_CHIA-PET_1585	chr16	33962743	33963365	-551	NR_038368	649159	LINC00273	long intergenic non-protein coding RNA 273
ERα_CHIA-PET_1586	chr16	46413430	46413948	189320	NR_026556	124149	ANKRD26P1	ankyrin repeat domain 26 pseudogene 1
ERα_CHIA-PET_1587	chr16	46435019	46435528	167736	NR_026556	124149	ANKRD26P1	ankyrin repeat domain 26 pseudogene 1
ERα_CHIA-PET_1588	chr16	48269386	48269889	-549	NM_032583	85320	ABCC11	ATP binding cassette subfamily C member 11	+	+
ERα_CHIA-PET_1589	chr16	48281359	48281992	3597	NM_001300948	83752	LONP2	lon peptidase 2, peroxisomal	+
ERα_CHIA-PET_1590	chr16	53079149	53080100	-9321	NM_025134	80205	CHD9	chromodomain helicase DNA binding protein 9
ERα_CHIA-PET_1591	chr16	53088242	53089267	-191	NM_025134	80205	CHD9	chromodomain helicase DNA binding protein 9
ERα_CHIA-PET_1592	chr16	53132985	53133952	44523	NM_025134	80205	CHD9	chromodomain helicase DNA binding protein 9	+
ERα_CHIA-PET_1593	chr16	53766054	53766958	28631	NM_001080432	79068	FTO	fat mass and obesity associated
ERα_CHIA-PET_1594	chr16	53778336	53778864	40725	NM_001080432	79068	FTO	fat mass and obesity associated	+
ERα_CHIA-PET_1595	chr16	53809276	53810089	71807	NM_001080432	79068	FTO	fat mass and obesity associated
ERα_CHIA-PET_1596	chr16	54128602	54129205	55598	NR_103838	100505692	FTO-IT1	FTO intronic transcript 1	+
ERα_CHIA-PET_1597	chr16	54457714	54458383	-137670	NM_024336	79191	IRX3	iroquois homeobox 3	+
ERα_CHIA-PET_1598	chr16	54459643	54460155	-139521	NM_024336	79191	IRX3	iroquois homeobox 3
ERα_CHIA-PET_1599	chr16	54465883	54466776	-145951	NM_024336	79191	IRX3	iroquois homeobox 3	+
ERα_CHIA-PET_1600	chr16	56279851	56280823	905	NR_037499	100500891	MIR3935	microRNA 3935
ERα_CHIA-PET_1601	chr16	56358203	56358755	79047	NR_037499	100500891	MIR3935	microRNA 3935
ERα_CHIA-PET_1602	chr16	56404527	56405439	54467	NM_001144	267	AMFR	autocrine motility factor receptor, E3 ubiquitin protein ligase
ERα_CHIA-PET_1603	chr16	56663396	56663916	-2878	NM_176870	4499	MT1M	metallothionein 1M
ERα_CHIA-PET_1604	chr16	56673664	56674216	1362	NM_005946	4489	MT1A	metallothionein 1A
ERα_CHIA-PET_1605	chr16	56894731	56895595	2733	NR_029680	406930	MIR138-2	microRNA 138-2		+
ERα_CHIA-PET_1606	chr16	56956114	56956878	-9506	NM_001010989	9709	HERPUD1	homocysteine-inducible, endoplasmic reticulum stress-inducible, ubiquitin-like domain member 1	+
ERα_CHIA-PET_1607	chr16	58417869	58418652	-8038	NM_001126129	64785	GINS3	GINS complex subunit 3 (Psf3 homolog)	+
ERα_CHIA-PET_1608	chr16	58504906	58505513	6483	NM_022910	65009	NDRG4	NDRG family member 4	+
ERα_CHIA-PET_1609	chr16	66311666	66312450	-88467	NM_001795	1003	CDH5	cadherin 5, type 2 (vascular endothelium)
ERα_CHIA-PET_1610	chr16	66328949	66329820	-71141	NM_001795	1003	CDH5	cadherin 5, type 2 (vascular endothelium)	+
ERα_CHIA-PET_1611	chr16	68036731	68037309	-3599	NM_022355	64174	DPEP2	dipeptidase 2		+
ERα_CHIA-PET_1612	chr16	68271532	68272172	-1716	NM_024939	80004	ESRP2	epithelial splicing regulatory protein 2	+
ERα_CHIA-PET_1613	chr16	68295218	68295734	-2943	NM_001076785	9057	SLC7A6	solute carrier family 7 (amino acid transporter light chain, y+L system), member 6	+
ERα_CHIA-PET_1614	chr16	68361696	68362635	17148	NM_001290018	54496	PRMT7	protein arginine methyltransferase 7		+
ERα_CHIA-PET_1615	chr16	68432419	68433276	49562	NM_018667	55512	SMPD3	sphingomyelin phosphodiesterase 3, neutral membrane (neutral sphingomyelinase II)
ERα_CHIA-PET_1616	chr16	68450464	68451232	31561	NM_018667	55512	SMPD3	sphingomyelin phosphodiesterase 3, neutral membrane (neutral sphingomyelinase II)
ERα_CHIA-PET_1617	chr16	68459889	68460709	22110	NM_018667	55512	SMPD3	sphingomyelin phosphodiesterase 3, neutral membrane (neutral sphingomyelinase II)		+
ERα_CHIA-PET_1618	chr16	68741410	68742428	-29276	NM_004360	999	CDH1	cadherin 1, type 1
ERα_CHIA-PET_1619	chr16	68768519	68769114	-2379	NM_004360	999	CDH1	cadherin 1, type 1		+
ERα_CHIA-PET_1620	chr16	68778758	68779379	2649	NR_106988	102465753	MIR7641-2	microRNA 7641-2
ERα_CHIA-PET_1621	chr16	68779387	68780170	3359	NR_106988	102465753	MIR7641-2	microRNA 7641-2
ERα_CHIA-PET_1622	chr16	71095709	71096669	168436	NM_001198543	54768	HYDIN	HYDIN, axonemal central pair apparatus protein
ERα_CHIA-PET_1623	chr16	72869820	72870722	-171363	NR_126330	101927957	LINC01572	long intergenic non-protein coding RNA 1572	+	+
ERα_CHIA-PET_1624	chr16	72946711	72947953	134942	NM_006885	463	ZFHX3	zinc finger homeobox 3
ERα_CHIA-PET_1625	chr16	72963049	72964015	118742	NM_006885	463	ZFHX3	zinc finger homeobox 3	+
ERα_CHIA-PET_1626	chr16	72969611	72970666	112136	NM_006885	463	ZFHX3	zinc finger homeobox 3
ERα_CHIA-PET_1627	chr16	72978469	72979444	103318	NM_006885	463	ZFHX3	zinc finger homeobox 3		+
ERα_CHIA-PET_1628	chr16	72986579	72987415	95277	NM_006885	463	ZFHX3	zinc finger homeobox 3
ERα_CHIA-PET_1629	chr16	73030275	73031222	51526	NM_006885	463	ZFHX3	zinc finger homeobox 3		+
ERα_CHIA-PET_1630	chr16	73049313	73050376	32430	NM_006885	463	ZFHX3	zinc finger homeobox 3	+
ERα_CHIA-PET_1631	chr16	73089035	73089953	3040	NM_001164766	463	ZFHX3	zinc finger homeobox 3
ERα_CHIA-PET_1632	chr16	75063586	75064279	31017	NM_032268	84937	ZNRF1	zinc and ring finger 1, E3 ubiquitin protein ligase	+
ERα_CHIA-PET_1633	chr16	75088030	75088617	55408	NM_032268	84937	ZNRF1	zinc and ring finger 1, E3 ubiquitin protein ligase
ERα_CHIA-PET_1634	chr16	75343731	75344261	-42045	NM_001170715	9564	BCAR1	breast cancer anti-estrogen resistance 1	+
ERα_CHIA-PET_1635	chr16	75363769	75364428	-62147	NM_001170715	9564	BCAR1	breast cancer anti-estrogen resistance 1	+
ERα_CHIA-PET_1636	chr16	78641338	78642060	508389	NR_120436	51741	WWOX	WW domain containing oxidoreductase
ERα_CHIA-PET_1637	chr16	78671994	78672853	539113	NR_120436	51741	WWOX	WW domain containing oxidoreductase
ERα_CHIA-PET_1638	chr16	79019533	79020436	614638	NM_001031804	4094	MAF	v-maf avian musculoaponeurotic fibrosarcoma oncogene homolog	+
ERα_CHIA-PET_1639	chr16	79071058	79072150	563018	NM_001031804	4094	MAF	v-maf avian musculoaponeurotic fibrosarcoma oncogene homolog	+
ERα_CHIA-PET_1640	chr16	79083713	79084273	550629	NM_001031804	4094	MAF	v-maf avian musculoaponeurotic fibrosarcoma oncogene homolog
ERα_CHIA-PET_1641	chr16	79205333	79206382	428765	NM_001031804	4094	MAF	v-maf avian musculoaponeurotic fibrosarcoma oncogene homolog	+
ERα_CHIA-PET_1642	chr16	79238089	79239076	396040	NM_001031804	4094	MAF	v-maf avian musculoaponeurotic fibrosarcoma oncogene homolog	+	+
ERα_CHIA-PET_1643	chr16	79283963	79284724	350279	NM_001031804	4094	MAF	v-maf avian musculoaponeurotic fibrosarcoma oncogene homolog	+
ERα_CHIA-PET_1644	chr16	79666244	79666830	-31915	NM_005360	4094	MAF	v-maf avian musculoaponeurotic fibrosarcoma oncogene homolog		+
ERα_CHIA-PET_1645	chr16	80057653	80058466	228913	NR_104661	101928248	LINC01229	long intergenic non-protein coding RNA 1229	+	+
ERα_CHIA-PET_1646	chr16	80118486	80119366	289780	NR_104661	101928248	LINC01229	long intergenic non-protein coding RNA 1229
ERα_CHIA-PET_1647	chr16	80499841	80500773	-74324	NM_001305017	83657	DYNLRB2	dynein, light chain, roadblock-type 2
ERα_CHIA-PET_1648	chr16	81309188	81310055	37325	NM_017429	53630	BCO1	beta-carotene oxygenase 1	+
ERα_CHIA-PET_1649	chr16	81972809	81973396	71991	NM_145168	93517	SDR42E1	short chain dehydrogenase/reductase family 42E, member 1	+
ERα_CHIA-PET_1650	chr16	82117221	82118221	48863	NM_002153	3294	HSD17B2	hydroxysteroid (17-beta) dehydrogenase 2
ERα_CHIA-PET_1651	chr16	82138913	82139841	64452	NM_005792	10200	MPHOSPH6	M-phase phosphoprotein 6	+
ERα_CHIA-PET_1652	chr16	82170573	82171399	32843	NM_005792	10200	MPHOSPH6	M-phase phosphoprotein 6	+
ERα_CHIA-PET_1653	chr16	82171596	82172375	31844	NM_005792	10200	MPHOSPH6	M-phase phosphoprotein 6
ERα_CHIA-PET_1654	chr16	82186291	82186795	17286	NM_005792	10200	MPHOSPH6	M-phase phosphoprotein 6
ERα_CHIA-PET_1655	chr16	83945894	83946719	13576	NM_012213	23417	MLYCD	malonyl-CoA decarboxylase
ERα_CHIA-PET_1656	chr16	83960271	83961402	-25991	NM_182981	29948	OSGIN1	oxidative stress induced growth inhibitor 1
ERα_CHIA-PET_1657	chr16	83980187	83981202	-6133	NM_182981	29948	OSGIN1	oxidative stress induced growth inhibitor 1
ERα_CHIA-PET_1658	chr16	84130059	84130924	20057	NM_003791	8720	MBTPS1	membrane bound transcription factor peptidase, site 1
ERα_CHIA-PET_1659	chr16	84209133	84209657	11281	NM_001243157	9013	TAF1C	TATA box binding protein (TBP)-associated factor, RNA polymerase I, C, 110kDa	+
ERα_CHIA-PET_1660	chr16	84494289	84495004	43642	NM_020947	57707	TLDC1	TBC/LysM-associated domain containing 1	+
ERα_CHIA-PET_1661	chr16	84823126	84823905	-30072	NM_031476	83716	CRISPLD2	cysteine-rich secretory protein LCCL domain containing 2	+
ERα_CHIA-PET_1662	chr16	85178615	85179350	8226	NR_033984	400548	LOC400548	uncharacterized LOC400548	+
ERα_CHIA-PET_1663	chr16	85180531	85181697	10358	NR_033984	400548	LOC400548	uncharacterized LOC400548
ERα_CHIA-PET_1664	chr16	85283048	85283584	-33248	NR_038859	197196	LINC00311	long intergenic non-protein coding RNA 311	+
ERα_CHIA-PET_1665	chr16	85321492	85323337	5850	NR_038859	197196	LINC00311	long intergenic non-protein coding RNA 311	+
ERα_CHIA-PET_1666	chr16	85323895	85324489	7628	NR_038859	197196	LINC00311	long intergenic non-protein coding RNA 311		+
ERα_CHIA-PET_1667	chr16	85339364	85340459	20	NR_049816	100847022	MIR5093	microRNA 5093	+	+
ERα_CHIA-PET_1668	chr16	85344937	85346140	-5607	NR_049816	100847022	MIR5093	microRNA 5093	+	+
ERα_CHIA-PET_1669	chr16	85352090	85352894	-12561	NR_049816	100847022	MIR5093	microRNA 5093	+	+
ERα_CHIA-PET_1670	chr16	85355313	85356209	-15830	NR_049816	100847022	MIR5093	microRNA 5093		+
ERα_CHIA-PET_1671	chr16	85383570	85384440	-44074	NR_049816	100847022	MIR5093	microRNA 5093	+
ERα_CHIA-PET_1672	chr16	85456136	85456812	-116543	NR_049816	100847022	MIR5093	microRNA 5093		+
ERα_CHIA-PET_1673	chr16	85480415	85481301	-140927	NR_049816	100847022	MIR5093	microRNA 5093		+
ERα_CHIA-PET_1674	chr16	85490675	85491507	-151160	NR_049816	100847022	MIR5093	microRNA 5093	+
ERα_CHIA-PET_1675	chr16	85492288	85493195	-152288	NM_001134473	23199	GSE1	Gse1 coiled-coil protein
ERα_CHIA-PET_1676	chr16	85499114	85500290	-145327	NM_001134473	23199	GSE1	Gse1 coiled-coil protein	+
ERα_CHIA-PET_1677	chr16	85507634	85508217	-137104	NM_001134473	23199	GSE1	Gse1 coiled-coil protein
ERα_CHIA-PET_1678	chr16	85508539	85509557	-135981	NM_001134473	23199	GSE1	Gse1 coiled-coil protein
ERα_CHIA-PET_1679	chr16	85524720	85526301	-119519	NM_001134473	23199	GSE1	Gse1 coiled-coil protein	+	+
ERα_CHIA-PET_1680	chr16	85554126	85555417	-90258	NM_001134473	23199	GSE1	Gse1 coiled-coil protein
ERα_CHIA-PET_1681	chr16	85557863	85558777	-86709	NM_001134473	23199	GSE1	Gse1 coiled-coil protein
ERα_CHIA-PET_1682	chr16	85580416	85581136	-64253	NM_001134473	23199	GSE1	Gse1 coiled-coil protein
ERα_CHIA-PET_1683	chr16	85855156	85855770	22290	NM_001861	1327	COX4I1	cytochrome c oxidase subunit IV isoform 1
ERα_CHIA-PET_1684	chr16	85914825	85915610	-17557	NM_002163	3394	IRF8	interferon regulatory factor 8		+
ERα_CHIA-PET_1685	chr16	85924670	85925577	-7651	NM_002163	3394	IRF8	interferon regulatory factor 8		+
ERα_CHIA-PET_1686	chr16	86004322	86004881	52648	NR_106832	102466732	MIR6774	microRNA 6774	+
ERα_CHIA-PET_1687	chr16	86899304	86900050	-191713	NR_126008	440390	LOC440390	uncharacterized LOC440390	+
ERα_CHIA-PET_1688	chr16	86935062	86935894	-155912	NR_126008	440390	LOC440390	uncharacterized LOC440390		+
ERα_CHIA-PET_1689	chr16	86964551	86965486	-126372	NR_126008	440390	LOC440390	uncharacterized LOC440390	+	+
ERα_CHIA-PET_1690	chr16	86979816	86980423	-111271	NR_126008	440390	LOC440390	uncharacterized LOC440390
ERα_CHIA-PET_1691	chr16	87033493	87034317	-57485	NR_126008	440390	LOC440390	uncharacterized LOC440390
ERα_CHIA-PET_1692	chr16	87812343	87813784	-309	NR_120309	102724467	LOC102724467	uncharacterized LOC102724467	+
ERα_CHIA-PET_1693	chr16	87822962	87824860	-11157	NR_120309	102724467	LOC102724467	uncharacterized LOC102724467		+
ERα_CHIA-PET_1694	chr16	87839811	87841298	27712	NR_106833	102465464	MIR6775	microRNA 6775		+
ERα_CHIA-PET_1695	chr16	87865816	87866672	2022	NR_106833	102465464	MIR6775	microRNA 6775	+
ERα_CHIA-PET_1696	chr16	87867732	87868863	-31	NR_106833	102465464	MIR6775	microRNA 6775	+	+
ERα_CHIA-PET_1697	chr16	87894264	87894779	8579	NM_003486	8140	SLC7A5	solute carrier family 7 (amino acid transporter light chain, L system), member 5	+
ERα_CHIA-PET_1698	chr16	88050368	88051277	47198	NM_001173543	54971	BANP	BTG3 associated nuclear protein
ERα_CHIA-PET_1699	chr16	88668173	88668824	31709	NM_144604	124245	ZC3H18	zinc finger CCCH-type containing 18	+
ERα_CHIA-PET_1700	chr16	88828117	88828849	19308	NR_120387	339059	LOC339059	uncharacterized LOC339059
ERα_CHIA-PET_1701	chr16	88989948	88990886	-16030	NM_001290330	100129697	LOC100129697	uncharacterized LOC100129697	+
ERα_CHIA-PET_1702	chr16	88993212	88994172	-12755	NM_001290330	100129697	LOC100129697	uncharacterized LOC100129697	+	+
ERα_CHIA-PET_1703	chr16	88994572	88995137	-11593	NM_001290330	100129697	LOC100129697	uncharacterized LOC100129697	+
ERα_CHIA-PET_1704	chr16	89002540	89003230	-3562	NM_001290330	100129697	LOC100129697	uncharacterized LOC100129697
ERα_CHIA-PET_1705	chr16	89041065	89041578	2183	NM_005187	863	CBFA2T3	core-binding factor, runt domain, alpha subunit 2; translocated to, 3		+
ERα_CHIA-PET_1706	chr16	89220359	89220966	-4966	NR_024347	283860	LINC00304	long intergenic non-protein coding RNA 304		+
ERα_CHIA-PET_1707	chr16	89411998	89412728	24822	NM_001242885	100287036	LOC100287036	uncharacterized LOC100287036	+
ERα_CHIA-PET_1708	chr16	89449127	89449745	-47890	NR_110931	101927817	LOC101927817	uncharacterized LOC101927817	+
ERα_CHIA-PET_1709	chr16	89460144	89460758	-36875	NR_110931	101927817	LOC101927817	uncharacterized LOC101927817		+
ERα_CHIA-PET_1710	chr17	1634323	1634928	6500	NM_001163809	124997	WDR81	WD repeat domain 81	+
ERα_CHIA-PET_1711	chr17	1639385	1640397	-6239	NM_001165921	5345	SERPINF2	serpin peptidase inhibitor, clade F (alpha-2 antiplasmin, pigment epithelium derived factor), member 2	+
ERα_CHIA-PET_1712	chr17	1679888	1680776	15073	NM_002615	5176	SERPINF1	serpin peptidase inhibitor, clade F (alpha-2 antiplasmin, pigment epithelium derived factor), member 1
ERα_CHIA-PET_1713	chr17	4139450	4140381	27227	NM_001257999	51479	ANKFY1	ankyrin repeat and FYVE domain containing 1	+
ERα_CHIA-PET_1714	chr17	4150969	4151942	15687	NM_001257999	51479	ANKFY1	ankyrin repeat and FYVE domain containing 1
ERα_CHIA-PET_1715	chr17	4437003	4438202	21079	NM_014520	10514	MYBBP1A	MYB binding protein (P160) 1a	+
ERα_CHIA-PET_1716	chr17	4478874	4479785	-7947	NM_198501	342527	SMTNL2	smoothelin-like 2	+
ERα_CHIA-PET_1717	chr17	4496533	4497295	9080	NM_001114974	342527	SMTNL2	smoothelin-like 2	+
ERα_CHIA-PET_1718	chr17	4583861	4584741	-23224	NR_103482	101559451	LOC101559451	uncharacterized LOC101559451
ERα_CHIA-PET_1719	chr17	6378347	6378899	30888	NM_019013	54478	FAM64A	family with sequence similarity 64, member A
ERα_CHIA-PET_1720	chr17	6578759	6580071	18377	NR_045985	100652883	ALOX15P1	arachidonate 15-lipoxygenase pseudogene 1	+	+
ERα_CHIA-PET_1721	chr17	6589215	6590239	27013	NM_177550	284111	SLC13A5	solute carrier family 13 (sodium-dependent citrate transporter), member 5	+	+
ERα_CHIA-PET_1722	chr17	7854844	7855345	19652	NM_001037144	116840	CNTROB	centrobin, centrosomal BRCA2 interacting protein
ERα_CHIA-PET_1723	chr17	7860915	7861620	25825	NM_001037144	116840	CNTROB	centrobin, centrosomal BRCA2 interacting protein
ERα_CHIA-PET_1724	chr17	9575943	9576451	27343	NM_153210	124739	USP43	ubiquitin specific peptidase 43
ERα_CHIA-PET_1725	chr17	9596869	9597781	48471	NM_153210	124739	USP43	ubiquitin specific peptidase 43	+	+
ERα_CHIA-PET_1726	chr17	9606518	9607478	58144	NM_153210	124739	USP43	ubiquitin specific peptidase 43		+
ERα_CHIA-PET_1727	chr17	9871977	9872814	-9629	NM_003644	8522	GAS7	growth arrest-specific 7
ERα_CHIA-PET_1728	chr17	10119026	10119626	-17458	NM_201433	8522	GAS7	growth arrest-specific 7	+
ERα_CHIA-PET_1729	chr17	16978533	16979412	32898	NM_015134	23164	MPRIP	myosin phosphatase Rho interacting protein	+
ERα_CHIA-PET_1730	chr17	16980832	16981423	35053	NM_015134	23164	MPRIP	myosin phosphatase Rho interacting protein		+
ERα_CHIA-PET_1731	chr17	16990510	16991465	44913	NM_015134	23164	MPRIP	myosin phosphatase Rho interacting protein		+
ERα_CHIA-PET_1732	chr17	17349658	17350278	-30332	NM_018019	55090	MED9	mediator complex subunit 9	+
ERα_CHIA-PET_1733	chr17	17417466	17418315	-18181	NM_001199989	51655	RASD1	RAS, dexamethasone-induced 1	+	+
ERα_CHIA-PET_1734	chr17	17634027	17634873	35166	NR_130894	100861516	RAI1-AS1	RAI1 antisense RNA 1	+
ERα_CHIA-PET_1735	chr17	17658327	17659390	10758	NR_130894	100861516	RAI1-AS1	RAI1 antisense RNA 1	+
ERα_CHIA-PET_1736	chr17	17686200	17687096	-3805	NR_024007	140771	SMCR5	Smith-Magenis syndrome chromosome region, candidate 5 (non-protein coding)	+
ERα_CHIA-PET_1737	chr17	17743308	17743854	-3256	NM_001005291	6720	SREBF1	sterol regulatory element binding transcription factor 1
ERα_CHIA-PET_1738	chr17	17789942	17790773	-50032	NM_001005291	6720	SREBF1	sterol regulatory element binding transcription factor 1	+	+
ERα_CHIA-PET_1739	chr17	19622785	19623320	-3009	NM_152908	146802	SLC47A2	solute carrier family 47 (multidrug and toxin extrusion), member 2
ERα_CHIA-PET_1740	chr17	25574254	25574854	46468	NR_039748	100616277	MIR4522	microRNA 4522		+
ERα_CHIA-PET_1741	chr17	25648301	25649126	27607	NM_015626	26118	WSB1	WD repeat and SOCS box containing 1
ERα_CHIA-PET_1742	chr17	26172190	26172875	-44977	NM_000625	4843	NOS2	nitric oxide synthase 2, inducible
ERα_CHIA-PET_1743	chr17	26200451	26201278	19545	NM_001076680	201229	LYRM9	LYR motif containing 9
ERα_CHIA-PET_1744	chr17	26824580	26825743	24497	NM_003984	9058	SLC13A2	solute carrier family 13 (sodium-dependent dicarboxylate transporter), member 2	+
ERα_CHIA-PET_1745	chr17	26826559	26827484	-23938	NM_003593	8456	FOXN1	forkhead box N1	+
ERα_CHIA-PET_1746	chr17	26851690	26853397	1584	NM_003593	8456	FOXN1	forkhead box N1	+	+
ERα_CHIA-PET_1747	chr17	26859508	26860332	8961	NM_003593	8456	FOXN1	forkhead box N1	+
ERα_CHIA-PET_1748	chr17	26863456	26864889	13213	NM_003593	8456	FOXN1	forkhead box N1	+
ERα_CHIA-PET_1749	chr17	26866985	26867558	12375	NM_054035	9094	UNC119	unc-119 lipid binding chaperone
ERα_CHIA-PET_1750	chr17	26942407	26943225	-1605	NM_001174103	124923	SGK494	uncharacterized serine/threonine-protein kinase SgK494
ERα_CHIA-PET_1751	chr17	26960796	26961733	10913	NM_014680	9703	KIAA0100	KIAA0100		+
ERα_CHIA-PET_1752	chr17	29827046	29827757	12382	NM_001303542	84440	RAB11FIP4	RAB11 family interacting protein 4 (class II)
ERα_CHIA-PET_1753	chr17	29893250	29894311	6765	NR_029710	406968	MIR193A	microRNA 193a	+
ERα_CHIA-PET_1754	chr17	29981710	29982702	79776	NR_029856	100126356	MIR365B	microRNA 365b	+
ERα_CHIA-PET_1755	chr17	30072558	30073456	113319	NM_018405	55352	COPRS	coordinator of PRMT5, differentiation stimulator	+
ERα_CHIA-PET_1756	chr17	37028605	37029346	2863	NR_073384	3927	LASP1	LIM and SH3 protein 1	+
ERα_CHIA-PET_1757	chr17	37068165	37068952	-2674	NR_106837	102465467	MIR6779	microRNA 6779	+
ERα_CHIA-PET_1758	chr17	38336716	38337648	2940	NM_016339	51195	RAPGEFL1	Rap guanine nucleotide exchange factor like 1	+
ERα_CHIA-PET_1759	chr17	38467227	38468555	2468	NM_000964	5914	RARA	retinoic acid receptor, alpha	+	+
ERα_CHIA-PET_1760	chr17	38470467	38471386	-3547	NM_001145302	5914	RARA	retinoic acid receptor, alpha
ERα_CHIA-PET_1761	chr17	38478250	38479199	4251	NM_001145301	5914	RARA	retinoic acid receptor, alpha	+
ERα_CHIA-PET_1762	chr17	38604255	38605611	5257	NM_001552	3487	IGFBP4	insulin like growth factor binding protein 4	+	+
ERα_CHIA-PET_1763	chr17	38629559	38630478	27836	NM_032865	84951	TNS4	tensin 4
ERα_CHIA-PET_1764	chr17	38663391	38664265	-5974	NM_032865	84951	TNS4	tensin 4	+
ERα_CHIA-PET_1765	chr17	38690530	38691104	25829	NM_001301718	1236	CCR7	chemokine (C-C motif) receptor 7
ERα_CHIA-PET_1766	chr17	38705196	38706100	10998	NM_001301718	1236	CCR7	chemokine (C-C motif) receptor 7		+
ERα_CHIA-PET_1767	chr17	38707775	38708693	8412	NM_001301718	1236	CCR7	chemokine (C-C motif) receptor 7	+	+
ERα_CHIA-PET_1768	chr17	38708761	38709357	7587	NM_001301718	1236	CCR7	chemokine (C-C motif) receptor 7	+
ERα_CHIA-PET_1769	chr17	38711317	38712457	4759	NM_001301718	1236	CCR7	chemokine (C-C motif) receptor 7	+
ERα_CHIA-PET_1770	chr17	38731967	38733263	-10879	NM_001838	1236	CCR7	chemokine (C-C motif) receptor 7
ERα_CHIA-PET_1771	chr17	38738263	38739242	-17016	NM_001838	1236	CCR7	chemokine (C-C motif) receptor 7	+
ERα_CHIA-PET_1772	chr17	38775998	38776776	27716	NM_003079	6605	SMARCE1	SWI/SNF related, matrix associated, actin dependent regulator of chromatin, subfamily e, member 1	+	+
ERα_CHIA-PET_1773	chr17	38843382	38844345	16139	NM_019016	192666	KRT24	keratin 24, type I	+
ERα_CHIA-PET_1774	chr17	38856956	38857985	2532	NM_019016	192666	KRT24	keratin 24, type I	+
ERα_CHIA-PET_1775	chr17	39571920	39572631	8547	NM_003770	8688	KRT37	keratin 37, type I	+
ERα_CHIA-PET_1776	chr17	39662701	39663444	-1207	NM_002274	3860	KRT13	keratin 13, type I	+
ERα_CHIA-PET_1777	chr17	39691974	39692845	-7768	NM_002276	3880	KRT19	keratin 19, type I	+
ERα_CHIA-PET_1778	chr17	39933608	39934692	8814	NM_002230	3728	JUP	junction plakoglobin
ERα_CHIA-PET_1779	chr17	39949278	39950040	-6695	NM_021991	3728	JUP	junction plakoglobin
ERα_CHIA-PET_1780	chr17	42295195	42296058	1415	NM_001076684	7343	UBTF	upstream binding transcription factor, RNA polymerase I	+
ERα_CHIA-PET_1781	chr17	42408537	42409424	-6763	NM_016016	51629	SLC25A39	solute carrier family 25, member 39
ERα_CHIA-PET_1782	chr17	42988279	42989120	4221	NM_001131019	2670	GFAP	glial fibrillary acidic protein	+	+
ERα_CHIA-PET_1783	chr17	43058389	43059079	-13090	NM_006688	10882	C1QL1	complement component 1, q subcomponent-like 1
ERα_CHIA-PET_1784	chr17	43120202	43121264	8152	NM_001288655	79877	DCAKD	dephospho-CoA kinase domain containing	+
ERα_CHIA-PET_1785	chr17	43207132	43207908	2380	NM_133373	113026	PLCD3	phospholipase C, delta 3
ERα_CHIA-PET_1786	chr17	43390771	43391345	3372	NM_003954	9020	MAP3K14	mitogen-activated protein kinase kinase kinase 14	+
ERα_CHIA-PET_1787	chr17	44048039	44048558	-28318	NM_001007532	246744	STH	saitohin
ERα_CHIA-PET_1788	chr17	45750795	45752075	-21195	NM_014726	9755	TBKBP1	TBK1 binding protein 1
ERα_CHIA-PET_1789	chr17	45764124	45765029	-8054	NM_014726	9755	TBKBP1	TBK1 binding protein 1
ERα_CHIA-PET_1790	chr17	45770218	45771148	-1947	NM_014726	9755	TBKBP1	TBK1 binding protein 1
ERα_CHIA-PET_1791	chr17	45774456	45775284	2240	NM_014726	9755	TBKBP1	TBK1 binding protein 1
ERα_CHIA-PET_1792	chr17	47163443	47163960	-46121	NM_001159388	124872	B4GALNT2	beta-1,4-N-acetyl-galactosaminyl transferase 2
ERα_CHIA-PET_1793	chr17	47184114	47184768	-25381	NM_001159388	124872	B4GALNT2	beta-1,4-N-acetyl-galactosaminyl transferase 2
ERα_CHIA-PET_1794	chr17	47964561	47965619	-39711	NM_001077503	255061	TAC4	tachykinin 4 (hemokinin)	+
ERα_CHIA-PET_1795	chr17	47987752	47988623	-58375	NM_138281	1748	DLX4	distal-less homeobox 4	+
ERα_CHIA-PET_1796	chr17	48074075	48074646	-1772	NM_005220	1747	DLX3	distal-less homeobox 3
ERα_CHIA-PET_1797	chr17	48241258	48242415	-1530	NM_001135697	6442	SGCA	sarcoglycan alpha		+
ERα_CHIA-PET_1798	chr17	48343877	48345198	-4230	NM_001168215	162461	TMEM92	transmembrane protein 92
ERα_CHIA-PET_1799	chr17	48384780	48385588	-19968	NR_125805	103752589	TMEM92-AS1	TMEM92 antisense RNA 1	+
ERα_CHIA-PET_1800	chr17	48394379	48395323	-28542	NR_110010	64132	XYLT2	xylosyltransferase II
ERα_CHIA-PET_1801	chr17	48732875	48733819	21129	NM_001144070	8714	ABCC3	ATP binding cassette subfamily C member 3	+	+
ERα_CHIA-PET_1802	chr17	48756167	48756937	28718	NM_052855	91369	ANKRD40	ankyrin repeat domain 40	+	+
ERα_CHIA-PET_1803	chr17	48862245	48863160	16691	NR_107026	102466918	MIR8059	microRNA 8059	+	+
ERα_CHIA-PET_1804	chr17	48921276	48922134	9100	NM_175575	124857	WFIKKN2	WAP, follistatin/kazal, immunoglobulin, kunitz and netrin domain containing 2
ERα_CHIA-PET_1805	chr17	48922737	48923680	10603	NM_175575	124857	WFIKKN2	WAP, follistatin/kazal, immunoglobulin, kunitz and netrin domain containing 2		+
ERα_CHIA-PET_1806	chr17	48929308	48929991	14066	NM_005749	10140	TOB1	transducer of ERBB2, 1		+
ERα_CHIA-PET_1807	chr17	48942866	48943922	321	NM_005749	10140	TOB1	transducer of ERBB2, 1
ERα_CHIA-PET_1808	chr17	48965749	48966267	-20669	NM_001243877	10140	TOB1	transducer of ERBB2, 1
ERα_CHIA-PET_1809	chr17	48976552	48977107	-31490	NM_001243877	10140	TOB1	transducer of ERBB2, 1
ERα_CHIA-PET_1810	chr17	48981782	48983174	-37139	NM_001243877	10140	TOB1	transducer of ERBB2, 1
ERα_CHIA-PET_1811	chr17	48992139	48993084	-47272	NM_001243877	10140	TOB1	transducer of ERBB2, 1		+
ERα_CHIA-PET_1812	chr17	48996321	48997204	-51423	NM_001243877	10140	TOB1	transducer of ERBB2, 1
ERα_CHIA-PET_1813	chr17	49012548	49013391	-67630	NM_001243877	10140	TOB1	transducer of ERBB2, 1		+
ERα_CHIA-PET_1814	chr17	49021318	49022519	-76579	NM_001243877	10140	TOB1	transducer of ERBB2, 1	+
ERα_CHIA-PET_1815	chr17	49027098	49027998	-82209	NM_001243877	10140	TOB1	transducer of ERBB2, 1
ERα_CHIA-PET_1816	chr17	49029268	49029826	-84208	NM_001243877	10140	TOB1	transducer of ERBB2, 1
ERα_CHIA-PET_1817	chr17	49606746	49607244	192919	NR_122104	440446	LOC440446	uncharacterized LOC440446
ERα_CHIA-PET_1818	chr17	55162728	55163354	-37	NM_001242903	8165	AKAP1	A kinase (PRKA) anchor protein 1
ERα_CHIA-PET_1819	chr17	55243984	55244853	81283	NM_001242902	8165	AKAP1	A kinase (PRKA) anchor protein 1
ERα_CHIA-PET_1820	chr17	55346688	55347557	12748	NM_170721	124540	MSI2	musashi RNA binding protein 2	+	+
ERα_CHIA-PET_1821	chr17	55363847	55364680	29889	NM_170721	124540	MSI2	musashi RNA binding protein 2	+
ERα_CHIA-PET_1822	chr17	55417657	55418434	83671	NM_170721	124540	MSI2	musashi RNA binding protein 2
ERα_CHIA-PET_1823	chr17	55419883	55421008	86071	NM_170721	124540	MSI2	musashi RNA binding protein 2	+
ERα_CHIA-PET_1824	chr17	55434254	55436249	100877	NM_170721	124540	MSI2	musashi RNA binding protein 2
ERα_CHIA-PET_1825	chr17	55445844	55446803	111949	NM_170721	124540	MSI2	musashi RNA binding protein 2	+	+
ERα_CHIA-PET_1826	chr17	55449225	55450043	115260	NM_170721	124540	MSI2	musashi RNA binding protein 2
ERα_CHIA-PET_1827	chr17	55452747	55454718	119358	NM_170721	124540	MSI2	musashi RNA binding protein 2	+
ERα_CHIA-PET_1828	chr17	55590515	55591342	10030	NR_110808	101927557	LOC101927557	uncharacterized LOC101927557
ERα_CHIA-PET_1829	chr17	55911202	55912158	15753	NM_016070	51649	MRPS23	mitochondrial ribosomal protein S23
ERα_CHIA-PET_1830	chr17	55977184	55978011	3153	NM_001292025	404093	CUEDC1	CUE domain containing 1	+
ERα_CHIA-PET_1831	chr17	56032607	56033121	-180	NM_001271875	404093	CUEDC1	CUE domain containing 1	+
ERα_CHIA-PET_1832	chr17	56716652	56718347	51917	NM_031272	56155	TEX14	testis expressed 14	+
ERα_CHIA-PET_1833	chr17	56742249	56743013	26785	NM_031272	56155	TEX14	testis expressed 14	+
ERα_CHIA-PET_1834	chr17	57084966	57085505	99031	NM_015294	4591	TRIM37	tripartite motif containing 37
ERα_CHIA-PET_1835	chr17	57199675	57200212	15290	NR_030411	768216	MIR454	microRNA 454
ERα_CHIA-PET_1836	chr17	57906496	57907035	-11862	NR_029493	406991	MIR21	microRNA 21
ERα_CHIA-PET_1837	chr17	58422243	58423187	46871	NM_032582	84669	USP32	ubiquitin specific peptidase 32
ERα_CHIA-PET_1838	chr17	58424188	58424761	45112	NM_032582	84669	USP32	ubiquitin specific peptidase 32	+	+
ERα_CHIA-PET_1839	chr17	58548111	58548901	48641	NM_181707	124773	C17orf64	chromosome 17 open reading frame 64	+
ERα_CHIA-PET_1840	chr17	58645006	58645840	3516	NR_126009	388406	LOC388406	uncharacterized LOC388406
ERα_CHIA-PET_1841	chr17	59296736	59297281	179959	NR_125749	103689912	TBX2-AS1	TBX2 antisense RNA 1
ERα_CHIA-PET_1842	chr17	59313039	59313719	163588	NR_125749	103689912	TBX2-AS1	TBX2 antisense RNA 1		+
ERα_CHIA-PET_1843	chr17	59331584	59332173	145089	NR_125749	103689912	TBX2-AS1	TBX2 antisense RNA 1	+
ERα_CHIA-PET_1844	chr17	59433808	59434683	42722	NR_125749	103689912	TBX2-AS1	TBX2 antisense RNA 1		+
ERα_CHIA-PET_1845	chr17	59475870	59477871	97	NR_125749	103689912	TBX2-AS1	TBX2 antisense RNA 1	+
ERα_CHIA-PET_1846	chr17	59491923	59492760	3229	NM_203425	388407	C17orf82	chromosome 17 open reading frame 82	+
ERα_CHIA-PET_1847	chr17	59527368	59528358	-5944	NM_018488	9496	TBX4	T-box 4	+
ERα_CHIA-PET_1848	chr17	59595812	59596683	62440	NM_018488	9496	TBX4	T-box 4
ERα_CHIA-PET_1849	chr17	59638561	59639093	29736	NM_199290	342538	NACA2	nascent polypeptide-associated complex alpha subunit 2
ERα_CHIA-PET_1850	chr17	59800026	59801536	-132218	NM_199290	342538	NACA2	nascent polypeptide-associated complex alpha subunit 2	+
ERα_CHIA-PET_1851	chr17	59822187	59823197	118228	NM_032043	83990	BRIP1	BRCA1 interacting protein C-terminal helicase 1
ERα_CHIA-PET_1852	chr17	59877332	59878344	63082	NM_032043	83990	BRIP1	BRCA1 interacting protein C-terminal helicase 1
ERα_CHIA-PET_1853	chr17	59916681	59917311	23924	NM_032043	83990	BRIP1	BRCA1 interacting protein C-terminal helicase 1
ERα_CHIA-PET_1854	chr17	59939364	59940177	1150	NM_032043	83990	BRIP1	BRCA1 interacting protein C-terminal helicase 1
ERα_CHIA-PET_1855	chr17	60212579	60213299	-70296	NM_005121	9969	MED13	mediator complex subunit 13	+
ERα_CHIA-PET_1856	chr17	60837029	60837914	38613	NR_036146	100422923	MIR548W	microRNA 548w	+	+
ERα_CHIA-PET_1857	chr17	60881902	60882752	1687	NM_001100875	162333	MARCH10	membrane associated ring finger 10
ERα_CHIA-PET_1858	chr17	61038800	61039339	17493	NR_030363	693218	MIR633	microRNA 633		+
ERα_CHIA-PET_1859	chr17	61512702	61513567	5073	NM_001017917	1534	CYB561	cytochrome b561	+
ERα_CHIA-PET_1860	chr17	61530174	61531020	-6875	NM_001915	1534	CYB561	cytochrome b561
ERα_CHIA-PET_1861	chr17	61559373	61560251	-2366	NM_152830	1636	ACE	angiotensin I converting enzyme	+
ERα_CHIA-PET_1862	chr17	61829950	61830641	-10965	NM_001165970	92335	STRADA	STE20-related kinase adaptor alpha
ERα_CHIA-PET_1863	chr17	61847179	61847772	3613	NM_020198	57003	CCDC47	coiled-coil domain containing 47	+
ERα_CHIA-PET_1864	chr17	62151244	62152053	-53654	NM_001099789	3384	ICAM2	intercellular adhesion molecule 2	+
ERα_CHIA-PET_1865	chr17	62161646	62162247	45556	NM_001433	2081	ERN1	endoplasmic reticulum to nucleus signaling 1
ERα_CHIA-PET_1866	chr17	62209303	62209833	-2066	NM_001433	2081	ERN1	endoplasmic reticulum to nucleus signaling 1	+
ERα_CHIA-PET_1867	chr17	63156337	63157199	23312	NM_003835	8787	RGS9	regulator of G-protein signaling 9	+
ERα_CHIA-PET_1868	chr17	63190511	63191412	57505	NM_003835	8787	RGS9	regulator of G-protein signaling 9	+	+
ERα_CHIA-PET_1869	chr17	64929186	64930720	-31027	NM_014405	27092	CACNG4	calcium channel, voltage-dependent, gamma subunit 4	+	+
ERα_CHIA-PET_1870	chr17	64947935	64949068	-12479	NM_014405	27092	CACNG4	calcium channel, voltage-dependent, gamma subunit 4	+
ERα_CHIA-PET_1871	chr17	64959135	64959709	-1558	NM_014405	27092	CACNG4	calcium channel, voltage-dependent, gamma subunit 4		+
ERα_CHIA-PET_1872	chr17	64960565	64961265	-65	NM_014405	27092	CACNG4	calcium channel, voltage-dependent, gamma subunit 4
ERα_CHIA-PET_1873	chr17	65042368	65043284	2174	NM_000727	786	CACNG1	calcium channel, voltage-dependent, gamma subunit 1
ERα_CHIA-PET_1874	chr17	65043301	65043963	2980	NM_000727	786	CACNG1	calcium channel, voltage-dependent, gamma subunit 1
ERα_CHIA-PET_1875	chr17	65386950	65387767	13961	NM_012417	26207	PITPNC1	phosphatidylinositol transfer protein, cytoplasmic 1	+
ERα_CHIA-PET_1876	chr17	65407618	65408202	34513	NM_012417	26207	PITPNC1	phosphatidylinositol transfer protein, cytoplasmic 1	+
ERα_CHIA-PET_1877	chr17	65463373	65464400	90489	NM_012417	26207	PITPNC1	phosphatidylinositol transfer protein, cytoplasmic 1	+
ERα_CHIA-PET_1878	chr17	65487033	65487679	113959	NM_012417	26207	PITPNC1	phosphatidylinositol transfer protein, cytoplasmic 1
ERα_CHIA-PET_1879	chr17	65551295	65551907	-162348	NM_015462	25926	NOL11	nucleolar protein 11
ERα_CHIA-PET_1880	chr17	65553170	65554018	-160355	NM_015462	25926	NOL11	nucleolar protein 11		+
ERα_CHIA-PET_1881	chr17	66288051	66288765	772	NM_001267727	22901	ARSG	arylsulfatase G	+
ERα_CHIA-PET_1882	chr17	66292715	66293507	5475	NM_001267727	22901	ARSG	arylsulfatase G		+
ERα_CHIA-PET_1883	chr17	66322220	66322719	34833	NM_001267727	22901	ARSG	arylsulfatase G	+	+
ERα_CHIA-PET_1884	chr17	66324742	66325629	37549	NM_001267727	22901	ARSG	arylsulfatase G	+	+
ERα_CHIA-PET_1885	chr17	66335405	66336336	48234	NM_001267727	22901	ARSG	arylsulfatase G	+
ERα_CHIA-PET_1886	chr17	66374830	66375343	-34678	NM_001278433	5573	PRKAR1A	protein kinase, cAMP-dependent, regulatory, type I, alpha	+
ERα_CHIA-PET_1887	chr17	68221702	68222200	56275	NM_000891	3759	KCNJ2	potassium channel, inwardly rectifying subfamily J, member 2
ERα_CHIA-PET_1888	chr17	68336999	68337498	171572	NM_000891	3759	KCNJ2	potassium channel, inwardly rectifying subfamily J, member 2
ERα_CHIA-PET_1889	chr17	70613794	70614781	22324	NR_033876	400619	LINC00511	long intergenic non-protein coding RNA 511
ERα_CHIA-PET_1890	chr17	70630656	70631508	5529	NR_033876	400619	LINC00511	long intergenic non-protein coding RNA 511
ERα_CHIA-PET_1891	chr17	70636351	70637220	-174	NR_033876	400619	LINC00511	long intergenic non-protein coding RNA 511
ERα_CHIA-PET_1892	chr17	70679836	70681002	-43808	NR_033876	400619	LINC00511	long intergenic non-protein coding RNA 511
ERα_CHIA-PET_1893	chr17	71417472	71418115	-109650	NM_012121	23580	CDC42EP4	CDC42 effector protein (Rho GTPase binding) 4	+
ERα_CHIA-PET_1894	chr17	71502614	71503165	137338	NM_001144952	54549	SDK2	sidekick cell adhesion molecule 2	+
ERα_CHIA-PET_1895	chr17	71545883	71546785	93893	NM_001144952	54549	SDK2	sidekick cell adhesion molecule 2	+
ERα_CHIA-PET_1896	chr17	72121213	72121920	-78229	NM_000999	6169	RPL38	ribosomal protein L38
ERα_CHIA-PET_1897	chr17	72148729	72149427	-50717	NM_000999	6169	RPL38	ribosomal protein L38	+
ERα_CHIA-PET_1898	chr17	72734178	72734923	1194	NM_001006638	326624	RAB37	RAB37, member RAS oncogene family		+
ERα_CHIA-PET_1899	chr17	72740657	72741563	-3641	NM_004252	9368	SLC9A3R1	solute carrier family 9, subfamily A (NHE3, cation proton antiporter 3), member 3 regulator 1
ERα_CHIA-PET_1900	chr17	72754127	72755038	9830	NR_037409	100500847	MIR3615	microRNA 3615	+
ERα_CHIA-PET_1901	chr17	72756377	72757751	12312	NR_037409	100500847	MIR3615	microRNA 3615
ERα_CHIA-PET_1902	chr17	72765488	72767803	5919	NM_001305080	26151	NAT9	N-acetyltransferase 9 (GCN5-related, putative)	+	+
ERα_CHIA-PET_1903	chr17	72769881	72770393	2427	NM_001305080	26151	NAT9	N-acetyltransferase 9 (GCN5-related, putative)	+
ERα_CHIA-PET_1904	chr17	73510117	73511027	1092	NM_020753	57513	CASKIN2	CASK interacting protein 2	+
ERα_CHIA-PET_1905	chr17	73521574	73522460	234	NM_001015002	3993	LLGL2	lethal giant larvae homolog 2 (Drosophila)		+
ERα_CHIA-PET_1906	chr17	73545114	73545634	23591	NM_001015002	3993	LLGL2	lethal giant larvae homolog 2 (Drosophila)
ERα_CHIA-PET_1907	chr17	73569787	73570671	-13910	NM_001309242	80022	MYO15B	myosin XVB	+
ERα_CHIA-PET_1908	chr17	75251391	75252025	-25784	NM_001293695	10801	SEPT9	septin 9	+
ERα_CHIA-PET_1909	chr17	75282457	75283708	-891	NM_001113492	10801	SEPT9	septin 9	+	+
ERα_CHIA-PET_1910	chr17	75307816	75308664	-7357	NM_006640	10801	SEPT9	septin 9
ERα_CHIA-PET_1911	chr17	75324582	75325528	9458	NM_006640	10801	SEPT9	septin 9	+
ERα_CHIA-PET_1912	chr17	76369949	76370466	-4492	NR_111989	9489	PGS1	phosphatidylglycerophosphate synthase 1
ERα_CHIA-PET_1913	chr17	76371436	76372113	-2925	NR_111989	9489	PGS1	phosphatidylglycerophosphate synthase 1
ERα_CHIA-PET_1914	chr17	76393066	76393603	18635	NM_024419	9489	PGS1	phosphatidylglycerophosphate synthase 1
ERα_CHIA-PET_1915	chr17	76405253	76405774	30814	NM_024419	9489	PGS1	phosphatidylglycerophosphate synthase 1	+
ERα_CHIA-PET_1916	chr17	76407596	76408242	33220	NM_024419	9489	PGS1	phosphatidylglycerophosphate synthase 1
ERα_CHIA-PET_1917	chr17	76416907	76417874	42691	NM_024419	9489	PGS1	phosphatidylglycerophosphate synthase 1
ERα_CHIA-PET_1918	chr17	77013359	77013859	-5407	NM_153372	114897	C1QTNF1	C1q and tumor necrosis factor related protein 1
ERα_CHIA-PET_1919	chr17	77015905	77016578	-2775	NM_153372	114897	C1QTNF1	C1q and tumor necrosis factor related protein 1
ERα_CHIA-PET_1920	chr17	77024044	77024771	-670	NR_040018	100507410	C1QTNF1-AS1	C1QTNF1 antisense RNA 1		+
ERα_CHIA-PET_1921	chr17	77966017	77966830	-41767	NM_001271846	125058	TBC1D16	TBC1 domain family, member 16		+
ERα_CHIA-PET_1922	chr17	78368173	78368900	-20431	NM_173627	284131	ENDOV	endonuclease V	+
ERα_CHIA-PET_1923	chr17	79971452	79972240	8939	NM_001271006	201254	STRA13	stimulated by retinoic acid 13	+
ERα_CHIA-PET_1924	chr17	80061431	80062426	-5822	NM_004104	2194	FASN	fatty acid synthase	+	+
ERα_CHIA-PET_1925	chr17	80071381	80072505	-15837	NM_004104	2194	FASN	fatty acid synthase	+
ERα_CHIA-PET_1926	chr17	80479730	80480553	2547	NM_004514	3607	FOXK2	forkhead box K2	+
ERα_CHIA-PET_1927	chr17	80510332	80511012	33078	NM_004514	3607	FOXK2	forkhead box K2	+
ERα_CHIA-PET_1928	chr17	80526286	80526874	48986	NM_004514	3607	FOXK2	forkhead box K2	+
ERα_CHIA-PET_1929	chr17	80571795	80572523	34252	NM_019613	56270	WDR45B	WD repeat domain 45B	+
ERα_CHIA-PET_1930	chr17	80846503	80847578	-49109	NM_024702	79755	ZNF750	zinc finger protein 750
ERα_CHIA-PET_1931	chr17	80989901	80990558	19457	NM_001009905	146712	B3GNTL1	UDP-GlcNAc:betaGal beta-1,3-N-acetylglucosaminyltransferase-like 1
ERα_CHIA-PET_1932	chr17	81025166	81025883	-12043	NM_001004431	284207	METRNL	meteorin, glial cell differentiation regulator-like	+
ERα_CHIA-PET_1933	chr17	81066660	81067620	29573	NM_001004431	284207	METRNL	meteorin, glial cell differentiation regulator-like		+
ERα_CHIA-PET_1934	chr17	81128462	81129174	-45848	NR_029406	388574	RPL23AP87	ribosomal protein L23a pseudogene 87	+
ERα_CHIA-PET_1935	chr17	81137244	81138176	-36956	NR_029406	388574	RPL23AP87	ribosomal protein L23a pseudogene 87
ERα_CHIA-PET_1936	chr17	81143089	81143670	-31287	NR_029406	388574	RPL23AP87	ribosomal protein L23a pseudogene 87
ERα_CHIA-PET_1937	chr18	499111	499807	1270	NM_130386	81035	COLEC12	collectin sub-family member 12		+
ERα_CHIA-PET_1938	chr18	568419	568974	-11647	NM_004066	1068	CETN1	centrin 1		+
ERα_CHIA-PET_1939	chr18	3623915	3624824	20634	NR_119377	84777	DLGAP1-AS2	DLGAP1 antisense RNA 2
ERα_CHIA-PET_1940	chr18	3689099	3689615	85622	NR_119377	84777	DLGAP1-AS2	DLGAP1 antisense RNA 2	+	+
ERα_CHIA-PET_1941	chr18	9705357	9705876	-2612	NM_006868	11031	RAB31	RAB31, member RAS oncogene family	+
ERα_CHIA-PET_1942	chr18	9736802	9737476	28911	NM_006868	11031	RAB31	RAB31, member RAS oncogene family
ERα_CHIA-PET_1943	chr18	9757312	9758357	49606	NM_006868	11031	RAB31	RAB31, member RAS oncogene family	+
ERα_CHIA-PET_1944	chr18	9785334	9785885	77381	NM_006868	11031	RAB31	RAB31, member RAS oncogene family
ERα_CHIA-PET_1945	chr18	9803825	9804560	-81531	NM_032243	84203	TXNDC2	thioredoxin domain containing 2 (spermatozoa)
ERα_CHIA-PET_1946	chr18	10893071	10893711	-133744	NR_106846	102466735	MIR6788	microRNA 6788	+
ERα_CHIA-PET_1947	chr18	10909121	10909857	-149842	NR_106846	102466735	MIR6788	microRNA 6788
ERα_CHIA-PET_1948	chr18	11114132	11114950	34220	NM_022068	63895	PIEZO2	piezo-type mechanosensitive ion channel component 2	+
ERα_CHIA-PET_1949	chr18	11136134	11136859	12265	NM_022068	63895	PIEZO2	piezo-type mechanosensitive ion channel component 2		+
ERα_CHIA-PET_1950	chr18	11177617	11178401	-29248	NM_022068	63895	PIEZO2	piezo-type mechanosensitive ion channel component 2	+
ERα_CHIA-PET_1951	chr18	11268824	11269626	-120464	NM_022068	63895	PIEZO2	piezo-type mechanosensitive ion channel component 2	+
ERα_CHIA-PET_1952	chr18	11500372	11501110	10694	NR_110778	101927433	LINC01255	long intergenic non-protein coding RNA 1255
ERα_CHIA-PET_1953	chr18	13394601	13395897	32284	NR_040031	100288122	LDLRAD4-AS1	LDLRAD4 antisense RNA 1	+
ERα_CHIA-PET_1954	chr18	13425520	13426523	1512	NR_040031	100288122	LDLRAD4-AS1	LDLRAD4 antisense RNA 1
ERα_CHIA-PET_1955	chr18	13480360	13481275	20871	NR_049822	100847080	MIR5190	microRNA 5190
ERα_CHIA-PET_1956	chr18	13539251	13540631	-71172	NR_039752	100616130	MIR4526	microRNA 4526
ERα_CHIA-PET_1957	chr18	13616757	13617355	5293	NM_001276249	753	LDLRAD4	low density lipoprotein receptor class A domain containing 4
ERα_CHIA-PET_1958	chr18	18895585	18896258	73718	NM_001142966	80000	GREB1L	growth regulation by estrogen in breast cancer-like	+
ERα_CHIA-PET_1959	chr18	18909814	18910752	88080	NM_001142966	80000	GREB1L	growth regulation by estrogen in breast cancer-like	+	+
ERα_CHIA-PET_1960	chr18	18949004	18949556	127077	NM_001142966	80000	GREB1L	growth regulation by estrogen in breast cancer-like
ERα_CHIA-PET_1961	chr18	18984084	18984938	162308	NM_001142966	80000	GREB1L	growth regulation by estrogen in breast cancer-like
ERα_CHIA-PET_1962	chr18	19560451	19561300	-149508	NR_110369	102723167	MIR133A1HG	MIR133A1 host gene (non-protein coding)
ERα_CHIA-PET_1963	chr18	19693095	19694008	55378	NR_102763	100128893	GATA6-AS1	GATA6 antisense RNA 1 (head to head)	+	+
ERα_CHIA-PET_1964	chr18	19834265	19834847	85158	NM_005257	2627	GATA6	GATA binding protein 6	+
ERα_CHIA-PET_1965	chr18	20837472	20838354	102124	NM_138375	91768	CABLES1	Cdk5 and Abl enzyme substrate 1	+	+
ERα_CHIA-PET_1966	chr18	20957917	20958426	59754	NM_032933	85019	TMEM241	transmembrane protein 241
ERα_CHIA-PET_1967	chr18	21183807	21184763	-17704	NM_000271	4864	NPC1	Niemann-Pick disease, type C1	+
ERα_CHIA-PET_1968	chr18	21206881	21207928	35445	NM_173505	147463	ANKRD29	ankyrin repeat domain 29
ERα_CHIA-PET_1969	chr18	21209058	21210217	33212	NM_173505	147463	ANKRD29	ankyrin repeat domain 29
ERα_CHIA-PET_1970	chr18	21264259	21265215	-4670	NM_001127717	3909	LAMA3	laminin, alpha 3
ERα_CHIA-PET_1971	chr18	21273528	21274516	4615	NM_198129	3909	LAMA3	laminin, alpha 3
ERα_CHIA-PET_1972	chr18	21302314	21303247	33373	NM_198129	3909	LAMA3	laminin, alpha 3	+	+
ERα_CHIA-PET_1973	chr18	21631220	21631825	-36098	NR_110796	102724246	TTC39C-AS1	TTC39C antisense RNA 1
ERα_CHIA-PET_1974	chr18	30295211	30296136	57301	NM_020805	57565	KLHL14	kelch-like family member 14
ERα_CHIA-PET_1975	chr18	30349962	30350509	2739	NM_020805	57565	KLHL14	kelch-like family member 14	+
ERα_CHIA-PET_1976	chr18	39490553	39491071	-44351	NM_001308020	5289	PIK3C3	phosphatidylinositol 3-kinase, catalytic subunit type 3
ERα_CHIA-PET_1977	chr18	41456414	41457057	-599120	NM_020783	6860	SYT4	synaptotagmin IV	+	+
ERα_CHIA-PET_1978	chr18	41646399	41647249	464838	NR_110792	101927921	LINC01478	long intergenic non-protein coding RNA 1478
ERα_CHIA-PET_1979	chr18	42309345	42310367	48993	NM_015559	26040	SETBP1	SET binding protein 1	+
ERα_CHIA-PET_1980	chr18	42320702	42321648	60312	NM_015559	26040	SETBP1	SET binding protein 1
ERα_CHIA-PET_1981	chr18	42378628	42379347	118124	NM_015559	26040	SETBP1	SET binding protein 1
ERα_CHIA-PET_1982	chr18	42379531	42380417	119111	NM_015559	26040	SETBP1	SET binding protein 1	+
ERα_CHIA-PET_1983	chr18	42411291	42412286	138343	NR_036203	100422829	MIR4319	microRNA 4319	+
ERα_CHIA-PET_1984	chr18	42921778	42922319	129101	NM_001242692	8170	SLC14A2	solute carrier family 14 (urea transporter), member 2	+
ERα_CHIA-PET_1985	chr18	42939294	42940297	146848	NM_001242692	8170	SLC14A2	solute carrier family 14 (urea transporter), member 2	+
ERα_CHIA-PET_1986	chr18	43208613	43209492	14286	NM_007163	8170	SLC14A2	solute carrier family 14 (urea transporter), member 2	+
ERα_CHIA-PET_1987	chr18	43372809	43374031	-32125	NM_213602	284266	SIGLEC15	sialic acid binding Ig-like lectin 15	+
ERα_CHIA-PET_1988	chr18	43382044	43383286	-22880	NM_213602	284266	SIGLEC15	sialic acid binding Ig-like lectin 15	+
ERα_CHIA-PET_1989	chr18	43418502	43419065	13238	NM_213602	284266	SIGLEC15	sialic acid binding Ig-like lectin 15	+
ERα_CHIA-PET_1990	chr18	43438375	43439419	33352	NM_213602	284266	SIGLEC15	sialic acid binding Ig-like lectin 15	+
ERα_CHIA-PET_1991	chr18	43693546	43694665	9807	NM_138443	115106	HAUS1	HAUS augmin like complex subunit 1	+	+
ERα_CHIA-PET_1992	chr18	43853526	43854326	-60261	NR_046357	494470	RNF165	ring finger protein 165
ERα_CHIA-PET_1993	chr18	43955108	43955715	41224	NM_152470	494470	RNF165	ring finger protein 165	+	+
ERα_CHIA-PET_1994	chr18	45979758	45980694	-85201	NM_014772	9811	CTIF	CBP80/20-dependent translation initiation factor	+
ERα_CHIA-PET_1995	chr18	46210969	46211947	14487	NR_039897	100616366	MIR4743	microRNA 4743	+
ERα_CHIA-PET_1996	chr18	46500673	46501671	-24091	NM_005904	4092	SMAD7	SMAD family member 7	+
ERα_CHIA-PET_1997	chr18	46501785	46502766	-25194	NM_005904	4092	SMAD7	SMAD family member 7
ERα_CHIA-PET_1998	chr18	46508924	46510009	-32385	NM_005904	4092	SMAD7	SMAD family member 7	+
ERα_CHIA-PET_1999	chr18	46516783	46517935	-40278	NM_005904	4092	SMAD7	SMAD family member 7	+	+
[truncated: 2,513 more rows]

## Sheet: ERα_ChIP-seq peaks
Peak ID	Chr	Start	End	Distance to TSS	Nearest PromoterID	Entrez ID	Gene Name	Gene Description	ERE	HSE
ERα_ChIPseq_1	chr1	9944	10553	-1626	NR_046018	100287102	DDX11L1	DEAD/H (Asp-Glu-Ala-Asp/His) box helicase 11 like 1
ERα_ChIPseq_2	chr1	18210	18672	-1005	NR_107063	102465910	MIR6859-3	microRNA 6859-3	+
ERα_ChIPseq_3	chr1	29120	29566	27	NR_024540	653635	WASH7P	WAS protein family homolog 7 pseudogene	+	+
ERα_ChIPseq_4	chr1	440625	441164	73235	NM_001005277	81399	OR4F16	olfactory receptor, family 4, subfamily F, member 16	+
ERα_ChIPseq_5	chr1	541612	542220	22473	NR_125957	101928626	LOC101928626	uncharacterized LOC101928626	+
ERα_ChIPseq_6	chr1	912038	912914	5021	NM_001291366	84808	PERM1	PPARGC1 and ESRR induced regulator, muscle 1
ERα_ChIPseq_7	chr1	931021	931601	4241	NM_001142467	57801	HES4	hes family bHLH transcription factor 4
ERα_ChIPseq_8	chr1	1004233	1004722	5210	NM_001205252	401934	RNF223	ring finger protein 223	+	+
ERα_ChIPseq_9	chr1	1008302	1008652	1210	NM_001205252	401934	RNF223	ring finger protein 223
ERα_ChIPseq_10	chr1	1008753	1009990	316	NM_001205252	401934	RNF223	ring finger protein 223	+	+
ERα_ChIPseq_11	chr1	1014645	1015292	-5281	NM_001205252	401934	RNF223	ring finger protein 223	+
ERα_ChIPseq_12	chr1	1015451	1015884	-5980	NM_001205252	401934	RNF223	ring finger protein 223	+
ERα_ChIPseq_13	chr1	1071760	1072278	-378	NR_038869	254099	LINC01342	long intergenic non-protein coding RNA 1342	+
ERα_ChIPseq_14	chr1	1172259	1174096	5548	NM_080605	126792	B3GALT6	UDP-Gal:betaGal beta 1,3-galactosyltransferase 6	+	+
ERα_ChIPseq_15	chr1	1317583	1318317	-7132	NM_017900	54998	AURKAIP1	aurora kinase A interacting protein 1
ERα_ChIPseq_16	chr1	1368345	1368837	1362	NR_125994	102724312	LOC102724312	uncharacterized LOC102724312		+
ERα_ChIPseq_17	chr1	1607621	1608485	16190	NM_001290264	728661	SLC35E2B	solute carrier family 35, member E2B	+
ERα_ChIPseq_18	chr1	1670631	1671415	6415	NM_182838	9906	SLC35E2	solute carrier family 35, member E2	+
ERα_ChIPseq_19	chr1	1684670	1685049	5222	NM_001198995	65220	NADK	NAD kinase
ERα_ChIPseq_20	chr1	1690243	1691563	-822	NM_001198995	65220	NADK	NAD kinase
ERα_ChIPseq_21	chr1	2052931	2053631	17126	NM_001033582	5590	PRKCZ	protein kinase C, zeta
ERα_ChIPseq_22	chr1	2174756	2175192	14840	NM_003036	6497	SKI	SKI proto-oncogene
ERα_ChIPseq_23	chr1	2583560	2584169	-19383	NM_033467	79258	MMEL1	membrane metallo-endopeptidase-like 1
ERα_ChIPseq_24	chr1	2628842	2629448	-64664	NM_033467	79258	MMEL1	membrane metallo-endopeptidase-like 1
ERα_ChIPseq_25	chr1	2967672	2968617	16145	NR_024371	440556	LINC00982	long intergenic non-protein coding RNA 982
ERα_ChIPseq_26	chr1	3002368	3002974	16929	NM_199454	63976	PRDM16	PR domain containing 16	+
ERα_ChIPseq_27	chr1	3092562	3092962	48223	NR_036215	100422968	MIR4251	microRNA 4251
ERα_ChIPseq_28	chr1	3130088	3130737	85873	NR_036215	100422968	MIR4251	microRNA 4251
ERα_ChIPseq_29	chr1	3178042	3178610	133787	NR_036215	100422968	MIR4251	microRNA 4251	+	+
ERα_ChIPseq_30	chr1	3254844	3255273	-116089	NM_014448	27237	ARHGEF16	Rho guanine nucleotide exchange factor 16	+	+
ERα_ChIPseq_31	chr1	3369856	3370291	-1074	NM_014448	27237	ARHGEF16	Rho guanine nucleotide exchange factor 16	+
ERα_ChIPseq_32	chr1	3398731	3399147	27792	NM_014448	27237	ARHGEF16	Rho guanine nucleotide exchange factor 16
ERα_ChIPseq_33	chr1	3470001	3470492	7108	NR_030277	693135	MIR551A	microRNA 551a
ERα_ChIPseq_34	chr1	3471749	3472245	5357	NR_030277	693135	MIR551A	microRNA 551a
ERα_ChIPseq_35	chr1	3556801	3557469	9536	NM_017818	49856	WRAP73	WD repeat containing, antisense to TP73
ERα_ChIPseq_36	chr1	3611338	3611760	-3061	NM_001204192	7161	TP73	tumor protein p73
ERα_ChIPseq_37	chr1	3641782	3642304	21292	NR_033712	57212	TP73-AS1	TP73 antisense RNA 1
ERα_ChIPseq_38	chr1	3642866	3643553	20126	NR_033712	57212	TP73-AS1	TP73 antisense RNA 1
ERα_ChIPseq_39	chr1	3655743	3656300	7314	NR_033712	57212	TP73-AS1	TP73 antisense RNA 1
ERα_ChIPseq_40	chr1	3691419	3691912	2314	NM_001163724	388588	SMIM1	small integral membrane protein 1 (Vel blood group)		+
ERα_ChIPseq_41	chr1	3748793	3749315	24743	NM_014704	9731	CEP104	centrosomal protein 104kDa
ERα_ChIPseq_42	chr1	4432914	4433486	-38911	NR_027088	284661	LOC284661	uncharacterized LOC284661
ERα_ChIPseq_43	chr1	6134485	6134918	28527	NM_001199863	8514	KCNAB2	potassium channel, voltage gated subfamily A regulatory beta subunit 2	+
ERα_ChIPseq_44	chr1	6160959	6161553	55082	NM_001199863	8514	KCNAB2	potassium channel, voltage gated subfamily A regulatory beta subunit 2	+
ERα_ChIPseq_45	chr1	6217928	6218448	22006	NM_015557	26038	CHD5	chromodomain helicase DNA binding protein 5
ERα_ChIPseq_46	chr1	6235011	6235480	4949	NM_015557	26038	CHD5	chromodomain helicase DNA binding protein 5
ERα_ChIPseq_47	chr1	6295193	6295723	586	NM_012405	23463	ICMT	isoprenylcysteine carboxyl methyltransferase	+
ERα_ChIPseq_48	chr1	6543177	6543648	2117	NM_001265593	57449	PLEKHG5	pleckstrin homology domain containing, family G (with RhoGef domain) member 5	+
ERα_ChIPseq_49	chr1	6671605	6672142	-1883	NM_153812	148479	PHF13	PHD finger protein 13	+
ERα_ChIPseq_50	chr1	7019337	7020148	174358	NR_038934	23261	CAMTA1	calmodulin binding transcription activator 1	+
ERα_ChIPseq_51	chr1	7020275	7021055	175281	NR_038934	23261	CAMTA1	calmodulin binding transcription activator 1		+
ERα_ChIPseq_52	chr1	7043586	7044289	198553	NR_038934	23261	CAMTA1	calmodulin binding transcription activator 1
ERα_ChIPseq_53	chr1	7170324	7170743	325149	NR_038934	23261	CAMTA1	calmodulin binding transcription activator 1	+	+
ERα_ChIPseq_54	chr1	7283809	7284460	438750	NR_038934	23261	CAMTA1	calmodulin binding transcription activator 1
ERα_ChIPseq_55	chr1	7288687	7289174	443546	NR_038934	23261	CAMTA1	calmodulin binding transcription activator 1		+
ERα_ChIPseq_56	chr1	7386335	7386802	-444761	NM_004781	9341	VAMP3	vesicle associated membrane protein 3
ERα_ChIPseq_57	chr1	7507635	7508337	-323343	NM_004781	9341	VAMP3	vesicle associated membrane protein 3	+
ERα_ChIPseq_58	chr1	7600885	7601243	-230265	NM_004781	9341	VAMP3	vesicle associated membrane protein 3	+
ERα_ChIPseq_59	chr1	7666955	7667837	-163933	NM_004781	9341	VAMP3	vesicle associated membrane protein 3
ERα_ChIPseq_60	chr1	7944775	7945361	-31517	NM_021995	10911	UTS2	urotensin 2
ERα_ChIPseq_61	chr1	8251284	8251755	-17213	NR_125998	102724539	LOC102724539	uncharacterized LOC102724539	+
ERα_ChIPseq_62	chr1	8254519	8254871	-14037	NR_125998	102724539	LOC102724539	uncharacterized LOC102724539
ERα_ChIPseq_63	chr1	8257863	8258501	-10550	NR_125998	102724539	LOC102724539	uncharacterized LOC102724539	+	+
ERα_ChIPseq_64	chr1	8260416	8260830	-8109	NR_125998	102724539	LOC102724539	uncharacterized LOC102724539	+
ERα_ChIPseq_65	chr1	8262636	8263440	-5694	NR_125998	102724539	LOC102724539	uncharacterized LOC102724539
ERα_ChIPseq_66	chr1	8381613	8382629	3976	NM_001080397	50651	SLC45A1	solute carrier family 45, member 1
ERα_ChIPseq_67	chr1	8404629	8405385	26862	NM_001080397	50651	SLC45A1	solute carrier family 45, member 1
ERα_ChIPseq_68	chr1	9253846	9254323	-11687	NR_132742	106614088	MIR34AHG	MIR34A host gene
ERα_ChIPseq_69	chr1	9406024	9406579	53360	NM_025106	80176	SPSB1	splA/ryanodine receptor domain and SOCS box containing 1	+
ERα_ChIPseq_70	chr1	9416743	9417235	64048	NM_025106	80176	SPSB1	splA/ryanodine receptor domain and SOCS box containing 1
ERα_ChIPseq_71	chr1	9449691	9450209	39025	NR_104623	100506022	LOC100506022	uncharacterized LOC100506022	+
ERα_ChIPseq_72	chr1	9467216	9467545	21595	NR_104623	100506022	LOC100506022	uncharacterized LOC100506022
ERα_ChIPseq_73	chr1	9471141	9471512	17649	NR_104623	100506022	LOC100506022	uncharacterized LOC100506022	+
ERα_ChIPseq_74	chr1	9536777	9537333	-48000	NR_104622	100506022	LOC100506022	uncharacterized LOC100506022
ERα_ChIPseq_75	chr1	10010293	10011007	7164	NM_022787	64802	NMNAT1	nicotinamide nucleotide adenylyltransferase 1	+
ERα_ChIPseq_76	chr1	10078580	10078993	-14255	NM_001105562	10277	UBE4B	ubiquitination factor E4B	+
ERα_ChIPseq_77	chr1	10752481	10752917	104034	NM_001079843	54897	CASZ1	castor zinc finger 1	+
ERα_ChIPseq_78	chr1	10764667	10765188	91806	NM_001079843	54897	CASZ1	castor zinc finger 1
ERα_ChIPseq_79	chr1	10775540	10776381	80773	NM_001079843	54897	CASZ1	castor zinc finger 1
ERα_ChIPseq_80	chr1	10811164	10811634	45334	NM_001079843	54897	CASZ1	castor zinc finger 1
ERα_ChIPseq_81	chr1	10812409	10812865	44096	NM_001079843	54897	CASZ1	castor zinc finger 1	+
ERα_ChIPseq_82	chr1	11020541	11020985	21331	NM_001170754	148345	C1orf127	chromosome 1 open reading frame 127
ERα_ChIPseq_83	chr1	11099289	11100072	7616	NM_006610	10747	MASP2	mannan-binding lectin serine peptidase 2
ERα_ChIPseq_84	chr1	11100809	11101133	6325	NM_006610	10747	MASP2	mannan-binding lectin serine peptidase 2
ERα_ChIPseq_85	chr1	11101209	11102285	5549	NM_006610	10747	MASP2	mannan-binding lectin serine peptidase 2
ERα_ChIPseq_86	chr1	11434356	11434817	101331	NM_013319	29914	UBIAD1	UbiA prenyltransferase domain containing 1	+
ERα_ChIPseq_87	chr1	11503173	11503520	-35949	NM_020780	57540	PTCHD2	patched domain containing 2
ERα_ChIPseq_88	chr1	11854516	11854866	-11462	NM_001256959	1185	CLCN6	chloride channel, voltage-sensitive 6
ERα_ChIPseq_89	chr1	11954089	11954970	31956	NM_138346	90231	KIAA2013	KIAA2013
ERα_ChIPseq_90	chr1	11969504	11970068	16699	NM_138346	90231	KIAA2013	KIAA2013
ERα_ChIPseq_91	chr1	11982612	11983248	3555	NM_138346	90231	KIAA2013	KIAA2013	+
ERα_ChIPseq_92	chr1	12122253	12123138	-739	NM_001243	943	TNFRSF8	tumor necrosis factor receptor superfamily, member 8
ERα_ChIPseq_93	chr1	12149854	12150782	26884	NM_001281430	943	TNFRSF8	tumor necrosis factor receptor superfamily, member 8
ERα_ChIPseq_94	chr1	12208335	12208726	-18470	NR_107000	102465836	MIR7846	microRNA 7846
ERα_ChIPseq_95	chr1	12514009	12514534	-53029	NR_003025	677885	SNORA59A	small nucleolar RNA, H/ACA box 59A
ERα_ChIPseq_96	chr1	12545437	12546922	-21121	NR_003025	677885	SNORA59A	small nucleolar RNA, H/ACA box 59A	+
ERα_ChIPseq_97	chr1	12588591	12589041	21516	NR_003022	677882	SNORA59B	small nucleolar RNA, H/ACA box 59B	+
ERα_ChIPseq_98	chr1	12601608	12601970	34489	NR_003022	677882	SNORA59B	small nucleolar RNA, H/ACA box 59B	+
ERα_ChIPseq_99	chr1	12609603	12610111	29194	NR_106788	102466722	MIR6730	microRNA 6730	+
ERα_ChIPseq_100	chr1	12660037	12660898	17270	NM_004753	9249	DHRS3	dehydrogenase/reductase (SDR family) member 3	+
ERα_ChIPseq_101	chr1	12675886	12676606	1491	NM_004753	9249	DHRS3	dehydrogenase/reductase (SDR family) member 3
ERα_ChIPseq_102	chr1	12678385	12678960	-935	NM_004753	9249	DHRS3	dehydrogenase/reductase (SDR family) member 3		+
ERα_ChIPseq_103	chr1	12714646	12715109	10311	NM_001013630	343066	AADACL4	arylacetamide deacetylase-like 4
ERα_ChIPseq_104	chr1	14801327	14801703	-123698	NM_015209	23254	KAZN	kazrin, periplakin interacting protein
ERα_ChIPseq_105	chr1	14978946	14979429	53974	NM_201628	23254	KAZN	kazrin, periplakin interacting protein
ERα_ChIPseq_106	chr1	15171396	15172080	-78887	NM_001018000	23254	KAZN	kazrin, periplakin interacting protein
ERα_ChIPseq_107	chr1	15240296	15240802	-10076	NM_001018000	23254	KAZN	kazrin, periplakin interacting protein
ERα_ChIPseq_108	chr1	15303720	15304186	31538	NM_001017999	23254	KAZN	kazrin, periplakin interacting protein	+
ERα_ChIPseq_109	chr1	15342204	15342840	70107	NM_001017999	23254	KAZN	kazrin, periplakin interacting protein	+	+
ERα_ChIPseq_110	chr1	15351975	15352475	79810	NM_001017999	23254	KAZN	kazrin, periplakin interacting protein
ERα_ChIPseq_111	chr1	15375037	15375446	102826	NM_001017999	23254	KAZN	kazrin, periplakin interacting protein
ERα_ChIPseq_112	chr1	15556157	15556882	-17249	NM_052929	114827	FHAD1	forkhead-associated (FHA) phosphopeptide binding domain 1	+
ERα_ChIPseq_113	chr1	15611525	15612019	38004	NM_052929	114827	FHAD1	forkhead-associated (FHA) phosphopeptide binding domain 1	+
ERα_ChIPseq_114	chr1	15789433	15790108	6547	NM_033440	63036	CELA2A	chymotrypsin-like elastase family, member 2A	+
ERα_ChIPseq_115	chr1	16002253	16002578	-8412	NM_015164	23207	PLEKHM2	pleckstrin homology domain containing, family M (with RUN domain) member 2
ERα_ChIPseq_116	chr1	16126452	16126915	7511	NM_001089591	440567	UQCRHL	ubiquinol-cytochrome c reductase hinge protein like
ERα_ChIPseq_117	chr1	16458981	16459573	23305	NM_004431	1969	EPHA2	EPH receptor A2
ERα_ChIPseq_118	chr1	16468890	16469736	13269	NM_004431	1969	EPHA2	EPH receptor A2
ERα_ChIPseq_119	chr1	16469983	16470509	12336	NM_004431	1969	EPHA2	EPH receptor A2
ERα_ChIPseq_120	chr1	16500115	16500521	-17736	NM_004431	1969	EPHA2	EPH receptor A2
ERα_ChIPseq_121	chr1	16502249	16502856	-19970	NM_004431	1969	EPHA2	EPH receptor A2
ERα_ChIPseq_122	chr1	16839433	16840982	-21011	NR_023386	114819	CROCCP3	ciliary rootlet coiled-coil, rootletin pseudogene 3	+	+
ERα_ChIPseq_123	chr1	16934561	16935609	5015	NM_017940	55672	NBPF1	neuroblastoma breakpoint family, member 1		+
ERα_ChIPseq_124	chr1	16939647	16940381	86	NM_017940	55672	NBPF1	neuroblastoma breakpoint family, member 1	+
ERα_ChIPseq_125	chr1	16940509	16941429	-869	NM_017940	55672	NBPF1	neuroblastoma breakpoint family, member 1		+
ERα_ChIPseq_126	chr1	16950199	16951104	6750	NR_026752	84809	CROCCP2	ciliary rootlet coiled-coil, rootletin pseudogene 2	+
ERα_ChIPseq_127	chr1	17039840	17040285	6590	NR_026567	284729	ESPNP	espin pseudogene
ERα_ChIPseq_128	chr1	17066565	17068163	-6408	NM_001282321	729574	FAM231A	family with sequence similarity 231, member A	+
ERα_ChIPseq_129	chr1	17222258	17223396	-25618	NM_014675	9696	CROCC	ciliary rootlet coiled-coil, rootletin	+
ERα_ChIPseq_130	chr1	17355903	17356357	-17663	NM_001141974	23400	ATP13A2	ATPase type 13A2	+
ERα_ChIPseq_131	chr1	17556011	17556602	-19287	NM_016233	51702	PADI3	peptidyl arginine deiminase, type III
ERα_ChIPseq_132	chr1	17563712	17564418	-11528	NM_016233	51702	PADI3	peptidyl arginine deiminase, type III	+
ERα_ChIPseq_133	chr1	17571746	17572228	-3606	NM_016233	51702	PADI3	peptidyl arginine deiminase, type III	+	+
ERα_ChIPseq_134	chr1	17634517	17634895	16	NM_012387	23569	PADI4	peptidyl arginine deiminase, type IV
ERα_ChIPseq_135	chr1	17641108	17641637	6682	NM_012387	23569	PADI4	peptidyl arginine deiminase, type IV	+
ERα_ChIPseq_136	chr1	17795299	17795760	-29279	NM_018715	55920	RCC2	regulator of chromosome condensation 2
ERα_ChIPseq_137	chr1	17799190	17799675	-33182	NM_018715	55920	RCC2	regulator of chromosome condensation 2	+
ERα_ChIPseq_138	chr1	17846743	17847591	-19163	NM_018125	55160	ARHGEF10L	Rho guanine nucleotide exchange factor 10 like	+
ERα_ChIPseq_139	chr1	17851460	17852014	-14593	NM_018125	55160	ARHGEF10L	Rho guanine nucleotide exchange factor 10 like
ERα_ChIPseq_140	chr1	17855646	17856735	-10140	NM_018125	55160	ARHGEF10L	Rho guanine nucleotide exchange factor 10 like	+
ERα_ChIPseq_141	chr1	17886172	17886885	20198	NM_018125	55160	ARHGEF10L	Rho guanine nucleotide exchange factor 10 like
ERα_ChIPseq_142	chr1	17887784	17888420	-18946	NM_001011722	55160	ARHGEF10L	Rho guanine nucleotide exchange factor 10 like		+
ERα_ChIPseq_143	chr1	17904124	17904442	-2765	NM_001011722	55160	ARHGEF10L	Rho guanine nucleotide exchange factor 10 like
ERα_ChIPseq_144	chr1	17912937	17913432	6136	NM_001011722	55160	ARHGEF10L	Rho guanine nucleotide exchange factor 10 like
ERα_ChIPseq_145	chr1	17926017	17926464	19192	NM_001011722	55160	ARHGEF10L	Rho guanine nucleotide exchange factor 10 like		+
ERα_ChIPseq_146	chr1	18001746	18002692	-79589	NM_030812	81569	ACTL8	actin-like 8
ERα_ChIPseq_147	chr1	18187127	18187587	105549	NM_030812	81569	ACTL8	actin-like 8
ERα_ChIPseq_148	chr1	18205466	18205838	123844	NM_030812	81569	ACTL8	actin-like 8	+
ERα_ChIPseq_149	chr1	18376121	18376547	-15817	NR_125946	101927876	LOC101927876	uncharacterized LOC101927876
ERα_ChIPseq_150	chr1	18458591	18459027	24569	NM_032880	84966	IGSF21	immunoglobin superfamily, member 21
ERα_ChIPseq_151	chr1	18641828	18642249	-165386	NM_152375	127707	KLHDC7A	kelch domain containing 7A
ERα_ChIPseq_152	chr1	18692258	18692842	-114874	NM_152375	127707	KLHDC7A	kelch domain containing 7A		+
ERα_ChIPseq_153	chr1	19251954	19252668	-23018	NM_003748	8659	ALDH4A1	aldehyde dehydrogenase 4 family, member A1
ERα_ChIPseq_154	chr1	19258125	19258595	24466	NM_001136265	126917	IFFO2	intermediate filament family orphan 2	+
ERα_ChIPseq_155	chr1	19333997	19334387	-51366	NM_001136265	126917	IFFO2	intermediate filament family orphan 2	+
ERα_ChIPseq_156	chr1	19752205	19752689	58754	NM_001282162	832	CAPZB	capping protein (actin filament) muscle Z-line, beta
ERα_ChIPseq_157	chr1	19798525	19798955	12461	NM_001282162	832	CAPZB	capping protein (actin filament) muscle Z-line, beta
ERα_ChIPseq_158	chr1	19908663	19909049	-14615	NM_001032363	440574	MINOS1	mitochondrial inner membrane organizing system 1	+	+
ERα_ChIPseq_159	chr1	19923002	19923878	-31	NM_001032363	440574	MINOS1	mitochondrial inner membrane organizing system 1	+
ERα_ChIPseq_160	chr1	20071348	20071835	54819	NM_181719	255104	TMCO4	transmembrane and coiled-coil domains 4
ERα_ChIPseq_161	chr1	20537881	20538482	-25202	NR_110078	101928017	UBXN10-AS1	UBXN10 antisense RNA 1
ERα_ChIPseq_162	chr1	20539787	20540265	-27047	NR_110078	101928017	UBXN10-AS1	UBXN10 antisense RNA 1	+
ERα_ChIPseq_163	chr1	20600104	20600849	-16936	NM_001039500	127731	VWA5B1	von Willebrand factor A domain containing 5B1
ERα_ChIPseq_164	chr1	20682360	20682713	65124	NM_001039500	127731	VWA5B1	von Willebrand factor A domain containing 5B1	+
ERα_ChIPseq_165	chr1	20683198	20684209	66291	NM_001039500	127731	VWA5B1	von Willebrand factor A domain containing 5B1	+
ERα_ChIPseq_166	chr1	20685134	20685675	67992	NM_001039500	127731	VWA5B1	von Willebrand factor A domain containing 5B1		+
ERα_ChIPseq_167	chr1	21029261	21030167	14796	NM_020816	57576	KIF17	kinesin family member 17
ERα_ChIPseq_168	chr1	21517174	21517775	-14093	NM_001198801	8672	EIF4G3	eukaryotic translation initiation factor 4 gamma, 3
ERα_ChIPseq_169	chr1	21568097	21568658	37806	NM_001113347	1889	ECE1	endothelin converting enzyme 1
ERα_ChIPseq_170	chr1	21569357	21569763	36623	NM_001113347	1889	ECE1	endothelin converting enzyme 1	+
ERα_ChIPseq_171	chr1	21578284	21578793	27645	NM_001113347	1889	ECE1	endothelin converting enzyme 1
ERα_ChIPseq_172	chr1	21581099	21581633	24817	NM_001113347	1889	ECE1	endothelin converting enzyme 1	+
ERα_ChIPseq_173	chr1	21594751	21595390	11113	NM_001113347	1889	ECE1	endothelin converting enzyme 1	+
ERα_ChIPseq_174	chr1	21650793	21651437	20919	NM_001113348	1889	ECE1	endothelin converting enzyme 1
ERα_ChIPseq_175	chr1	21771252	21771528	4807	NM_001256416	84224	NBPF3	neuroblastoma breakpoint family, member 3
ERα_ChIPseq_176	chr1	21931110	21931631	46978	NM_001145658	5909	RAP1GAP	RAP1 GTPase activating protein
ERα_ChIPseq_177	chr1	21948578	21948951	29584	NM_001145658	5909	RAP1GAP	RAP1 GTPase activating protein
ERα_ChIPseq_178	chr1	21965463	21965933	12650	NM_001145658	5909	RAP1GAP	RAP1 GTPase activating protein
ERα_ChIPseq_179	chr1	22231070	22231698	32406	NM_001291860	3339	HSPG2	heparan sulfate proteoglycan 2	+	+
ERα_ChIPseq_180	chr1	22557279	22558069	-35058	NR_039613	100616433	MIR4418	microRNA 4418
ERα_ChIPseq_181	chr1	22660003	22660645	67592	NR_039613	100616433	MIR4418	microRNA 4418
ERα_ChIPseq_182	chr1	22663053	22663538	70563	NR_039613	100616433	MIR4418	microRNA 4418
ERα_ChIPseq_183	chr1	22739045	22739855	-38894	NM_014870	9923	ZBTB40	zinc finger and BTB domain containing 40
ERα_ChIPseq_184	chr1	22769013	22769443	-9116	NM_014870	9923	ZBTB40	zinc finger and BTB domain containing 40
ERα_ChIPseq_185	chr1	22795936	22796491	17869	NM_001083621	9923	ZBTB40	zinc finger and BTB domain containing 40
ERα_ChIPseq_186	chr1	22798955	22799964	21115	NM_001083621	9923	ZBTB40	zinc finger and BTB domain containing 40	+
ERα_ChIPseq_187	chr1	22952481	22952688	7275	NR_106742	102466615	MIR6127	microRNA 6127
ERα_ChIPseq_188	chr1	23656372	23656817	14263	NM_001102398	10236	HNRNPR	heterogeneous nuclear ribonucleoprotein R
ERα_ChIPseq_189	chr1	23720461	23720934	-24340	NM_001077195	80818	ZNF436	zinc finger protein 436	+
ERα_ChIPseq_190	chr1	23799803	23800222	10738	NM_017707	55616	ASAP3	ArfGAP with SH3 domain, ankyrin repeat and PH domain 3		+
ERα_ChIPseq_191	chr1	23857297	23857708	210	NM_004091	1870	E2F2	E2F transcription factor 2	+
ERα_ChIPseq_192	chr1	23911881	23912483	-25897	NM_002167	3399	ID3	inhibitor of DNA binding 3, dominant negative helix-loop-helix protein	+
ERα_ChIPseq_193	chr1	23943740	23944079	-9915	NR_027042	259283	MDS2	myelodysplastic syndrome 2 translocation associated
ERα_ChIPseq_194	chr1	24327678	24328237	-21004	NM_001191005	10772	SRSF10	serine/arginine-rich splicing factor 10	+
ERα_ChIPseq_195	chr1	24338068	24338434	-31298	NM_001191005	10772	SRSF10	serine/arginine-rich splicing factor 10
ERα_ChIPseq_196	chr1	24345269	24345676	-38519	NM_001191005	10772	SRSF10	serine/arginine-rich splicing factor 10
ERα_ChIPseq_197	chr1	24538636	24539145	12160	NR_027087	284632	LOC284632	uncharacterized LOC284632
ERα_ChIPseq_198	chr1	24894188	24895116	12085	NM_001010980	400746	NCMAP	noncompact myelin associated protein
ERα_ChIPseq_199	chr1	24896832	24897416	14557	NM_001010980	400746	NCMAP	noncompact myelin associated protein	+
ERα_ChIPseq_200	chr1	25323262	25323716	-26505	NR_039623	100616365	MIR4425	microRNA 4425	+
ERα_ChIPseq_201	chr1	25802592	25803202	45548	NM_018202	55219	TMEM57	transmembrane protein 57
ERα_ChIPseq_202	chr1	25894545	25895072	24732	NM_015627	26119	LDLRAP1	low density lipoprotein receptor adaptor protein 1
ERα_ChIPseq_203	chr1	26083455	26084154	-42863	NM_020451	57190	SEPN1	selenoprotein N, 1	+
ERα_ChIPseq_204	chr1	26501479	26501819	-2332	NM_006314	10256	CNKSR1	connector enhancer of kinase suppressor of Ras 1
ERα_ChIPseq_205	chr1	26595301	26595689	-279	NM_001281518	64793	CEP85	centrosomal protein 85kDa
ERα_ChIPseq_206	chr1	27240534	27240914	-157	NM_021969	8431	NR0B2	nuclear receptor subfamily 0, group B, member 2
ERα_ChIPseq_207	chr1	27868463	27868992	-52029	NM_001201404	10163	WASF2	WAS protein family, member 2	+
ERα_ChIPseq_208	chr1	27884469	27884862	45340	NM_001029882	27245	AHDC1	AT hook, DNA binding motif, containing 1
ERα_ChIPseq_209	chr1	27971504	27972072	-10061	NM_005248	2268	FGR	FGR proto-oncogene, Src family tyrosine kinase	+
ERα_ChIPseq_210	chr1	27995375	27995933	3070	NM_022872	2537	IFI6	interferon, alpha-inducible protein 6
ERα_ChIPseq_211	chr1	28395102	28395521	19837	NM_001990	2140	EYA3	EYA transcriptional coactivator and phosphatase 3	+
ERα_ChIPseq_212	chr1	28846702	28847147	2179	NM_001048195	1104	RCC1	regulator of chromosome condensation 1	+
ERα_ChIPseq_213	chr1	29567361	29567719	4512	NM_001195001	10076	PTPRU	protein tyrosine phosphatase, receptor type, U
ERα_ChIPseq_214	chr1	29877062	29877494	-200652	NR_110758	101928460	LOC101928460	uncharacterized LOC101928460
ERα_ChIPseq_215	chr1	30196168	30196838	313956	NR_110790	101929406	LOC101929406	uncharacterized LOC101929406
ERα_ChIPseq_216	chr1	30458251	30458711	51978	NR_110790	101929406	LOC101929406	uncharacterized LOC101929406
ERα_ChIPseq_217	chr1	30459880	30460161	50439	NR_110790	101929406	LOC101929406	uncharacterized LOC101929406
ERα_ChIPseq_218	chr1	30775563	30775988	-265316	NR_110790	101929406	LOC101929406	uncharacterized LOC101929406
ERα_ChIPseq_219	chr1	30776039	30776424	-265772	NR_110790	101929406	LOC101929406	uncharacterized LOC101929406	+
ERα_ChIPseq_220	chr1	30818165	30818972	-308109	NR_110790	101929406	LOC101929406	uncharacterized LOC101929406
ERα_ChIPseq_221	chr1	30855480	30856093	-335833	NR_034182	100129196	MATN1-AS1	MATN1 antisense RNA 1
ERα_ChIPseq_222	chr1	30934366	30935056	-256908	NR_034182	100129196	MATN1-AS1	MATN1 antisense RNA 1		+
ERα_ChIPseq_223	chr1	31127894	31128793	-63276	NR_034182	100129196	MATN1-AS1	MATN1 antisense RNA 1
ERα_ChIPseq_224	chr1	31288390	31288901	-57962	NM_006762	7805	LAPTM5	lysosomal protein transmembrane 5
ERα_ChIPseq_225	chr1	31289412	31289755	-58900	NM_006762	7805	LAPTM5	lysosomal protein transmembrane 5
ERα_ChIPseq_226	chr1	31296590	31297040	-66132	NM_006762	7805	LAPTM5	lysosomal protein transmembrane 5		+
ERα_ChIPseq_227	chr1	31312452	31313125	68692	NM_014654	9672	SDC3	syndecan 3
ERα_ChIPseq_228	chr1	31659325	31659863	53140	NM_024522	79570	NKAIN1	Na+/K+ transporting ATPase interacting 1	+
ERα_ChIPseq_229	chr1	31669432	31669802	43117	NM_024522	79570	NKAIN1	Na+/K+ transporting ATPase interacting 1
ERα_ChIPseq_230	chr1	31841637	31842053	4078	NM_004102	2170	FABP3	fatty acid binding protein 3, muscle and heart	+
ERα_ChIPseq_231	chr1	31904364	31905155	18099	NM_018565	347735	SERINC2	serine incorporator 2
ERα_ChIPseq_232	chr1	32011918	32012310	28078	NR_027085	284551	LINC01226	long intergenic non-protein coding RNA 1226
ERα_ChIPseq_233	chr1	32210789	32211144	13370	NR_036216	100423028	MIR4254	microRNA 4254	+
ERα_ChIPseq_234	chr1	32220891	32221206	3288	NR_036216	100423028	MIR4254	microRNA 4254
ERα_ChIPseq_235	chr1	32295826	32296812	-14667	NM_144569	90853	SPOCD1	SPOC domain containing 1	+
ERα_ChIPseq_236	chr1	32308430	32308844	-26985	NM_144569	90853	SPOCD1	SPOC domain containing 1
ERα_ChIPseq_237	chr1	32320467	32321002	-39082	NM_144569	90853	SPOCD1	SPOC domain containing 1
ERα_ChIPseq_238	chr1	32324484	32324837	-43008	NM_144569	90853	SPOCD1	SPOC domain containing 1
ERα_ChIPseq_239	chr1	32345598	32346288	39316	NM_001195100	8073	PTP4A2	protein tyrosine phosphatase type IVA, member 2	+
ERα_ChIPseq_240	chr1	32798402	32798871	3204	NM_023009	65108	MARCKSL1	MARCKS-like 1	+
ERα_ChIPseq_241	chr1	35290490	35290823	32057	NM_002060	2701	GJA4	gap junction protein alpha 4
ERα_ChIPseq_242	chr1	35291140	35291780	32861	NM_002060	2701	GJA4	gap junction protein alpha 4	+
ERα_ChIPseq_243	chr1	35293739	35294190	30682	NM_001164824	113444	SMIM12	small integral membrane protein 12
ERα_ChIPseq_244	chr1	35308874	35309387	15516	NM_001164824	113444	SMIM12	small integral membrane protein 12	+
ERα_ChIPseq_245	chr1	36959308	36959654	-10566	NM_156039	1441	CSF3R	colony stimulating factor 3 receptor
ERα_ChIPseq_246	chr1	37259143	37259542	240502	NM_000831	2899	GRIK3	glutamate receptor, ionotropic, kainate 3
ERα_ChIPseq_247	chr1	37504150	37504709	-4585	NM_000831	2899	GRIK3	glutamate receptor, ionotropic, kainate 3	+
ERα_ChIPseq_248	chr1	37939955	37940305	11	NM_025079	80149	ZC3H12A	zinc finger CCCH-type containing 12A
ERα_ChIPseq_249	chr1	37960924	37961448	5409	NR_049844	100847010	MIR5581	microRNA 5581	+
ERα_ChIPseq_250	chr1	38188951	38189359	31082	NM_001256875	55143	CDCA8	cell division cycle associated 8
ERα_ChIPseq_251	chr1	38258775	38259571	-601	NM_001031740	149175	MANEAL	mannosidase, endo-alpha-like	+	+
ERα_ChIPseq_252	chr1	38589009	38589710	34456	NR_037432	100500801	MIR3659	microRNA 3659	+	+
ERα_ChIPseq_253	chr1	39608392	39608923	58818	NM_012090	23499	MACF1	microtubule-actin crosslinking factor 1		+
ERα_ChIPseq_254	chr1	39644633	39645075	95015	NM_012090	23499	MACF1	microtubule-actin crosslinking factor 1		+
ERα_ChIPseq_255	chr1	39720948	39721349	-154028	NM_015038	643314	KIAA0754	KIAA0754	+
ERα_ChIPseq_256	chr1	40496176	40496593	-9871	NM_001105530	10487	CAP1	CAP, adenylate cyclase-associated protein 1 (yeast)	+
ERα_ChIPseq_257	chr1	40606636	40607090	-20178	NM_012421	6018	RLF	rearranged L-myc fusion
ERα_ChIPseq_258	chr1	40782100	40782480	649	NM_001852	1298	COL9A2	collagen, type IX, alpha 2
ERα_ChIPseq_259	chr1	41269640	41270000	20136	NM_004700	9132	KCNQ4	potassium channel, voltage gated KQT-like subfamily Q, member 4	+
ERα_ChIPseq_260	chr1	41365015	41365525	-37252	NM_133467	163732	CITED4	Cbp/p300-interacting transactivator, with Glu/Asp rich carboxy-terminal domain, 4	+
ERα_ChIPseq_261	chr1	41372394	41372780	-44569	NM_133467	163732	CITED4	Cbp/p300-interacting transactivator, with Glu/Asp rich carboxy-terminal domain, 4
ERα_ChIPseq_262	chr1	41385007	41385575	-57273	NM_133467	163732	CITED4	Cbp/p300-interacting transactivator, with Glu/Asp rich carboxy-terminal domain, 4
ERα_ChIPseq_263	chr1	41389214	41389741	-55494	NR_125440	1503	CTPS1	CTP synthase 1	+
ERα_ChIPseq_264	chr1	41707260	41707713	329	NM_001172218	22955	SCMH1	sex comb on midleg homolog 1 (Drosophila)	+
ERα_ChIPseq_265	chr1	41837844	41838208	10423	NM_001291281	100132074	FOXO6	forkhead box O6
ERα_ChIPseq_266	chr1	41881102	41881582	53739	NM_001291281	100132074	FOXO6	forkhead box O6	+
ERα_ChIPseq_267	chr1	41889272	41889827	60805	NM_001302269	1907	EDN2	endothelin 2
ERα_ChIPseq_268	chr1	41891684	41892027	58499	NM_001302269	1907	EDN2	endothelin 2
ERα_ChIPseq_269	chr1	41955117	41955600	-5004	NM_001956	1907	EDN2	endothelin 2
ERα_ChIPseq_270	chr1	41964102	41964574	-13984	NM_001956	1907	EDN2	endothelin 2
ERα_ChIPseq_271	chr1	41979897	41980416	-29802	NM_001956	1907	EDN2	endothelin 2
ERα_ChIPseq_272	chr1	42010977	42011516	-60892	NM_001956	1907	EDN2	endothelin 2
ERα_ChIPseq_273	chr1	42098696	42099068	-148528	NM_001956	1907	EDN2	endothelin 2
ERα_ChIPseq_274	chr1	42243883	42244591	140141	NM_024503	59269	HIVEP3	human immunodeficiency virus type I enhancer binding protein 3	+
ERα_ChIPseq_275	chr1	42254964	42255963	128915	NM_024503	59269	HIVEP3	human immunodeficiency virus type I enhancer binding protein 3	+
ERα_ChIPseq_276	chr1	42325669	42326340	58374	NM_024503	59269	HIVEP3	human immunodeficiency virus type I enhancer binding protein 3	+
ERα_ChIPseq_277	chr1	42328250	42328675	55916	NM_024503	59269	HIVEP3	human immunodeficiency virus type I enhancer binding protein 3
ERα_ChIPseq_278	chr1	42331868	42332454	52217	NM_024503	59269	HIVEP3	human immunodeficiency virus type I enhancer binding protein 3	+
ERα_ChIPseq_279	chr1	42333855	42334318	50292	NM_024503	59269	HIVEP3	human immunodeficiency virus type I enhancer binding protein 3
ERα_ChIPseq_280	chr1	42356493	42357047	27608	NM_024503	59269	HIVEP3	human immunodeficiency virus type I enhancer binding protein 3
ERα_ChIPseq_281	chr1	42617752	42618245	-1094	NM_007102	2981	GUCA2B	guanylate cyclase activator 2B (uroguanylin)
ERα_ChIPseq_282	chr1	42631201	42631777	-1094	NM_033553	2980	GUCA2A	guanylate cyclase activator 2A (guanylin)
ERα_ChIPseq_283	chr1	43438915	43439442	-14331	NM_006516	6513	SLC2A1	solute carrier family 2 (facilitated glucose transporter), member 1	+
ERα_ChIPseq_284	chr1	43458014	43458635	-33477	NM_006516	6513	SLC2A1	solute carrier family 2 (facilitated glucose transporter), member 1
ERα_ChIPseq_285	chr1	43459257	43459591	-34577	NM_006516	6513	SLC2A1	solute carrier family 2 (facilitated glucose transporter), member 1
ERα_ChIPseq_286	chr1	43553953	43554430	-59403	NM_001101376	440585	FAM183A	family with sequence similarity 183, member A
ERα_ChIPseq_287	chr1	43889252	43889787	-24691	NR_106793	102465440	MIR6735	microRNA 6735
ERα_ChIPseq_288	chr1	44105546	44105992	-10028	NM_014663	9682	KDM4A	lysine (K)-specific demethylase 4A
ERα_ChIPseq_289	chr1	44296346	44297012	-7615	NR_106727	102464830	MIR6079	microRNA 6079	+	+
ERα_ChIPseq_290	chr1	44300702	44301140	-3373	NR_106727	102464830	MIR6079	microRNA 6079
ERα_ChIPseq_291	chr1	44533218	44533791	-36340	NM_001024845	6536	SLC6A9	solute carrier family 6 (neurotransmitter transporter, glycine), member 9	+
ERα_ChIPseq_292	chr1	45285037	45285586	11157	NM_001136537	149478	BTBD19	BTB (POZ) domain containing 19	+
ERα_ChIPseq_293	chr1	45770195	45770827	929	NR_024270	400752	LINC01144	long intergenic non-protein coding RNA 1144	+	+
ERα_ChIPseq_294	chr1	45982351	45983004	4933	NM_002574	5052	PRDX1	peroxiredoxin 1	+
ERα_ChIPseq_295	chr1	46318389	46318801	49310	NM_015112	23139	MAST2	microtubule associated serine/threonine kinase 2	+
ERα_ChIPseq_296	chr1	46637996	46638490	-2506	NM_005727	10103	TSPAN1	tetraspanin 1
ERα_ChIPseq_297	chr1	47223270	47223805	-38801	NM_014774	9813	EFCAB14	EF-hand calcium binding domain 14
ERα_ChIPseq_298	chr1	48354969	48355459	107348	NM_001194986	388630	TRABD2B	TraB domain containing 2B
ERα_ChIPseq_299	chr1	48360352	48360765	102004	NM_001194986	388630	TRABD2B	TraB domain containing 2B	+	+
ERα_ChIPseq_300	chr1	48386677	48387064	75692	NM_001194986	388630	TRABD2B	TraB domain containing 2B	+
ERα_ChIPseq_301	chr1	51772450	51773064	-9124	NM_001297666	22996	TTC39A	tetratricopeptide repeat domain 39A	+	+
ERα_ChIPseq_302	chr1	51786957	51787611	656	NM_001080494	22996	TTC39A	tetratricopeptide repeat domain 39A	+
ERα_ChIPseq_303	chr1	51794917	51795334	-201	NR_123731	102724097	TTC39A-AS1	TTC39A antisense RNA 1	+
ERα_ChIPseq_304	chr1	51795873	51796431	84	NM_001297663	22996	TTC39A	tetratricopeptide repeat domain 39A
ERα_ChIPseq_305	chr1	52007395	52007854	-22629	NM_001981	2060	EPS15	epidermal growth factor receptor pathway substrate 15	+
ERα_ChIPseq_306	chr1	52024174	52024709	-39446	NM_001981	2060	EPS15	epidermal growth factor receptor pathway substrate 15
ERα_ChIPseq_307	chr1	52033179	52033859	-48524	NM_001981	2060	EPS15	epidermal growth factor receptor pathway substrate 15
ERα_ChIPseq_308	chr1	52439313	52439808	16876	NM_002867	5865	RAB3B	RAB3B, member RAS oncogene family
ERα_ChIPseq_309	chr1	52442449	52442854	13785	NM_002867	5865	RAB3B	RAB3B, member RAS oncogene family
ERα_ChIPseq_310	chr1	52442895	52443304	13337	NM_002867	5865	RAB3B	RAB3B, member RAS oncogene family
ERα_ChIPseq_311	chr1	53749402	53750003	44119	NM_004631	7804	LRP8	LDL receptor related protein 8
ERα_ChIPseq_312	chr1	54407963	54408457	3286	NR_133633	51668	HSPB11	heat shock protein family B (small), member 11	+
ERα_ChIPseq_313	chr1	54481701	54482365	1826	NM_001276395	388633	LDLRAD1	low density lipoprotein receptor class A domain containing 1
ERα_ChIPseq_314	chr1	55894701	55895220	203646	NR_039618	100616272	MIR4422	microRNA 4422		+
ERα_ChIPseq_315	chr1	57013480	57013937	31549	NM_003713	8613	PLPP3	phospholipid phosphatase 3
ERα_ChIPseq_316	chr1	59495367	59495883	9477	NR_110626	101926925	LINC01358	long intergenic non-protein coding RNA 1358
ERα_ChIPseq_317	chr1	59605007	59605516	7218	NR_027120	729467	HSD52	uncharacterized LOC729467
ERα_ChIPseq_318	chr1	61681335	61681852	37597	NR_104180	645030	NFIA-AS1	NFIA antisense RNA 1	+
ERα_ChIPseq_319	chr1	61961859	61962646	-157662	NR_073400	414927	MGC34796	sepiapterin reductase (7,8-dihydrobiopterin:NADP+ oxidoreductase) pseudogene
ERα_ChIPseq_320	chr1	62107996	62108455	-11689	NR_073400	414927	MGC34796	sepiapterin reductase (7,8-dihydrobiopterin:NADP+ oxidoreductase) pseudogene
ERα_ChIPseq_321	chr1	62207826	62208683	105	NM_176877	10207	INADL	InaD-like (Drosophila)	+
ERα_ChIPseq_322	chr1	62209887	62210433	2011	NM_176877	10207	INADL	InaD-like (Drosophila)
ERα_ChIPseq_323	chr1	65344592	65345259	87262	NM_002227	3716	JAK1	Janus kinase 1
ERα_ChIPseq_324	chr1	65363775	65364302	68149	NM_002227	3716	JAK1	Janus kinase 1
ERα_ChIPseq_325	chr1	65448673	65449401	-16850	NM_002227	3716	JAK1	Janus kinase 1		+
ERα_ChIPseq_326	chr1	65456351	65456800	11584	NR_119383	101927084	LINC01359	long intergenic non-protein coding RNA 1359	+
ERα_ChIPseq_327	chr1	65462490	65462955	5437	NR_119383	101927084	LINC01359	long intergenic non-protein coding RNA 1359
ERα_ChIPseq_328	chr1	65465574	65466064	2340	NR_119383	101927084	LINC01359	long intergenic non-protein coding RNA 1359	+
ERα_ChIPseq_329	chr1	65472523	65472877	-4541	NR_119383	101927084	LINC01359	long intergenic non-protein coding RNA 1359
ERα_ChIPseq_330	chr1	65509762	65510696	13296	NR_037443	100500854	MIR3671	microRNA 3671	+
ERα_ChIPseq_331	chr1	67933912	67934306	-37986	NM_001018068	26135	SERBP1	SERPINE1 mRNA binding protein 1
ERα_ChIPseq_332	chr1	68044395	68044743	-106291	NM_001199741	1647	GADD45A	growth arrest and DNA-damage-inducible, alpha
ERα_ChIPseq_333	chr1	71056736	71057189	-115174	NR_125938	101927244	LOC101927244	uncharacterized LOC101927244
ERα_ChIPseq_334	chr1	71914159	71914742	367443	NR_046217	100852410	ZRANB2-AS2	ZRANB2 antisense RNA 2 (head to head)	+	+
ERα_ChIPseq_335	chr1	75118110	75118716	21009	NM_001002912	127254	ERICH3	glutamate rich 3	+
ERα_ChIPseq_336	chr1	77409829	77410194	76825	NM_030965	81849	ST6GALNAC5	ST6 (alpha-N-acetyl-neuraminyl-2,3-beta-galactosyl-1,3)-N-acetylgalactosaminide alpha-2,6-sialyltransferase 5	+
ERα_ChIPseq_337	chr1	79826918	79827385	-354656	NM_022159	64123	ADGRL4	adhesion G protein-coupled receptor L4	+
ERα_ChIPseq_338	chr1	79858054	79858475	-385769	NM_022159	64123	ADGRL4	adhesion G protein-coupled receptor L4	+
ERα_ChIPseq_339	chr1	81383964	81384445	277232	NR_125942	101927412	LOC101927412	uncharacterized LOC101927412
ERα_ChIPseq_340	chr1	81632606	81633247	390461	NR_125943	101927434	LOC101927434	uncharacterized LOC101927434
ERα_ChIPseq_341	chr1	81658648	81658973	364577	NR_125943	101927434	LOC101927434	uncharacterized LOC101927434
ERα_ChIPseq_342	chr1	81668028	81668317	355215	NR_125943	101927434	LOC101927434	uncharacterized LOC101927434	+
ERα_ChIPseq_343	chr1	82852317	82852938	586545	NM_012302	23266	ADGRL2	adhesion G protein-coupled receptor L2
ERα_ChIPseq_344	chr1	83330224	83330673	120157	NR_110632	101927498	LINC01361	long intergenic non-protein coding RNA 1361	+
ERα_ChIPseq_345	chr1	83521208	83521491	-69458	NR_110633	101927498	LINC01361	long intergenic non-protein coding RNA 1361
ERα_ChIPseq_346	chr1	84297658	84297974	28413	NR_119374	101927560	LOC101927560	uncharacterized LOC101927560	+
ERα_ChIPseq_347	chr1	85225378	85225848	-69373	NM_014021	117178	SSX2IP	synovial sarcoma, X breakpoint 2 interacting protein	+
ERα_ChIPseq_348	chr1	85658439	85658716	8151	NM_032184	84144	SYDE2	synapse defective 1, Rho GTPase, homolog 2 (C. elegans)
ERα_ChIPseq_349	chr1	85744294	85744822	-1971	NM_003921	8915	BCL10	B-cell CLL/lymphoma 10	+	+
ERα_ChIPseq_350	chr1	85763603	85763947	-21188	NM_003921	8915	BCL10	B-cell CLL/lymphoma 10	+
ERα_ChIPseq_351	chr1	85961054	85961593	-30434	NM_012137	23576	DDAH1	dimethylarginine dimethylaminohydrolase 1
ERα_ChIPseq_352	chr1	85969759	85970408	-39194	NM_012137	23576	DDAH1	dimethylarginine dimethylaminohydrolase 1		+
ERα_ChIPseq_353	chr1	86016602	86017090	27200	NM_001134445	23576	DDAH1	dimethylarginine dimethylaminohydrolase 1
ERα_ChIPseq_354	chr1	86288314	86288827	-114454	NM_017953	54680	ZNHIT6	zinc finger, HIT-type containing 6		+
ERα_ChIPseq_355	chr1	86296153	86296689	-122305	NM_017953	54680	ZNHIT6	zinc finger, HIT-type containing 6	+
ERα_ChIPseq_356	chr1	94064677	94065453	7540	NR_034091	100129046	LOC100129046	uncharacterized LOC100129046		+
ERα_ChIPseq_357	chr1	94074790	94075331	4642	NM_001261410	8412	BCAR3	breast cancer anti-estrogen resistance 3	+
ERα_ChIPseq_358	chr1	94245257	94245750	-66885	NR_030621	100126348	MIR760	microRNA 760
ERα_ChIPseq_359	chr1	94374289	94374623	698	NM_002061	2730	GCLM	glutamate-cysteine ligase, modifier subunit	+
ERα_ChIPseq_360	chr1	94583417	94583769	3112	NM_000350	24	ABCA4	ATP binding cassette subfamily A member 4
ERα_ChIPseq_361	chr1	94888615	94889055	4902	NM_001122674	5825	ABCD3	ATP binding cassette subfamily D member 3	+
ERα_ChIPseq_362	chr1	96525312	96525769	67916	NR_125991	102723661	LOC102723661	uncharacterized LOC102723661
ERα_ChIPseq_363	chr1	96525981	96526664	68698	NR_125991	102723661	LOC102723661	uncharacterized LOC102723661		+
ERα_ChIPseq_364	chr1	96538230	96538878	80930	NR_125991	102723661	LOC102723661	uncharacterized LOC102723661
ERα_ChIPseq_365	chr1	96629691	96630582	172512	NR_125991	102723661	LOC102723661	uncharacterized LOC102723661
ERα_ChIPseq_366	chr1	97306446	97306872	118465	NR_125356	58155	PTBP2	polypyrimidine tract binding protein 2
ERα_ChIPseq_367	chr1	97448600	97449280	-112539	NR_046590	100873932	DPYD-AS1	DPYD antisense RNA 1
ERα_ChIPseq_368	chr1	101831422	101831939	42287	NR_126402	104355286	LINC01307	long intergenic non-protein coding RNA 1307	+
ERα_ChIPseq_369	chr1	103298634	103299166	275152	NM_080630	1301	COL11A1	collagen, type XI, alpha 1
ERα_ChIPseq_370	chr1	103406810	103407471	166912	NM_080630	1301	COL11A1	collagen, type XI, alpha 1		+
ERα_ChIPseq_371	chr1	107963059	107963511	267841	NM_001079874	10451	VAV3	vav 3 guanine nucleotide exchange factor	+
ERα_ChIPseq_372	chr1	108298788	108299449	-67992	NM_001079874	10451	VAV3	vav 3 guanine nucleotide exchange factor	+
ERα_ChIPseq_373	chr1	108359605	108360175	-79955	NR_107006	102465839	MIR7852	microRNA 7852
ERα_ChIPseq_374	chr1	108478870	108479868	-27696	NR_046653	100873946	VAV3-AS1	VAV3 antisense RNA 1	+
ERα_ChIPseq_375	chr1	108741653	108743573	367	NM_013386	29957	SLC25A24	solute carrier family 25 (mitochondrial carrier; phosphate carrier), member 24	+
ERα_ChIPseq_376	chr1	108777318	108778979	8555	NM_001143989	148545	NBPF4	neuroblastoma breakpoint family, member 4		+
ERα_ChIPseq_377	chr1	108779612	108780923	6436	NM_001143989	148545	NBPF4	neuroblastoma breakpoint family, member 4	+
ERα_ChIPseq_378	chr1	108870717	108871157	-84234	NM_001143989	148545	NBPF4	neuroblastoma breakpoint family, member 4
ERα_ChIPseq_379	chr1	108924108	108925507	-68097	NM_001143988	653149	NBPF6	neuroblastoma breakpoint family, member 6	+
ERα_ChIPseq_380	chr1	108998590	109000004	6393	NM_001143987	653149	NBPF6	neuroblastoma breakpoint family, member 6	+
ERα_ChIPseq_381	chr1	109000593	109002318	8551	NM_001143987	653149	NBPF6	neuroblastoma breakpoint family, member 6		+
ERα_ChIPseq_382	chr1	109045768	109046299	53129	NM_001143987	653149	NBPF6	neuroblastoma breakpoint family, member 6		+
ERα_ChIPseq_383	chr1	109096600	109097162	-6090	NM_001010883	284611	FAM102B	family with sequence similarity 102, member B
ERα_ChIPseq_384	chr1	109658174	109658790	1897	NM_001267048	57535	KIAA1324	KIAA1324
ERα_ChIPseq_385	chr1	109680462	109681371	24331	NM_001267048	57535	KIAA1324	KIAA1324
ERα_ChIPseq_386	chr1	109693731	109694327	-35142	NM_001284353	57535	KIAA1324	KIAA1324	+
ERα_ChIPseq_387	chr1	109694795	109695303	-34122	NM_001284353	57535	KIAA1324	KIAA1324	+
ERα_ChIPseq_388	chr1	109741654	109742340	12826	NM_001284353	57535	KIAA1324	KIAA1324	+
ERα_ChIPseq_389	chr1	109782292	109783254	-9868	NM_001408	1952	CELSR2	cadherin, EGF LAG seven-pass G-type receptor 2	+
ERα_ChIPseq_390	chr1	109788737	109789383	-3581	NM_001408	1952	CELSR2	cadherin, EGF LAG seven-pass G-type receptor 2	+
ERα_ChIPseq_391	chr1	109793220	109793796	867	NM_001408	1952	CELSR2	cadherin, EGF LAG seven-pass G-type receptor 2		+
ERα_ChIPseq_392	chr1	109816958	109817857	8383	NM_032636	84722	PSRC1	proline/serine-rich coiled-coil 1
ERα_ChIPseq_393	chr1	110026580	110027419	438	NM_153340	127002	ATXN7L2	ataxin 7-like 2	+
ERα_ChIPseq_394	chr1	110090978	110091471	38	NM_006496	2773	GNAI3	guanine nucleotide binding protein (G protein), alpha inhibiting activity polypeptide 3
ERα_ChIPseq_395	chr1	110091537	110092004	584	NM_006496	2773	GNAI3	guanine nucleotide binding protein (G protein), alpha inhibiting activity polypeptide 3
ERα_ChIPseq_396	chr1	110267940	110268685	13448	NM_000851	2949	GSTM5	glutathione S-transferase mu 5
ERα_ChIPseq_397	chr1	110490500	110490931	-36672	NM_006621	10768	AHCYL1	adenosylhomocysteinase like 1	+
ERα_ChIPseq_398	chr1	110492911	110493546	-34159	NM_006621	10768	AHCYL1	adenosylhomocysteinase like 1
ERα_ChIPseq_399	chr1	110529877	110530468	2785	NM_001242673	10768	AHCYL1	adenosylhomocysteinase like 1
ERα_ChIPseq_400	chr1	110637084	110637446	11955	NR_126382	104355139	LINC01397	long intergenic non-protein coding RNA 1397
ERα_ChIPseq_401	chr1	110640876	110641404	-13922	NM_203412	164153	UBL4B	ubiquitin-like 4B
ERα_ChIPseq_402	chr1	111119087	111119582	29641	NM_004974	3737	KCNA2	potassium channel, voltage gated shaker related subfamily A, member 2
ERα_ChIPseq_403	chr1	111288796	111289618	-71552	NM_002232	3738	KCNA3	potassium channel, voltage gated shaker related subfamily A, member 3	+
ERα_ChIPseq_404	chr1	112015707	112016427	-424	NM_174896	128346	C1orf162	chromosome 1 open reading frame 162
ERα_ChIPseq_405	chr1	112051264	112051822	-4800	NM_001302678	140	ADORA3	adenosine A3 receptor
ERα_ChIPseq_406	chr1	112055764	112056642	-9460	NM_001302678	140	ADORA3	adenosine A3 receptor
ERα_ChIPseq_407	chr1	112057400	112057790	-10852	NM_001302678	140	ADORA3	adenosine A3 receptor	+
ERα_ChIPseq_408	chr1	112119200	112119854	-12902	NM_001302680	57413	TMIGD3	transmembrane and immunoglobulin domain containing 3		+
ERα_ChIPseq_409	chr1	112433236	112434151	-18586	NR_046619	100873995	KCND3-AS1	KCND3 antisense RNA 1	+
ERα_ChIPseq_410	chr1	112520693	112521912	10475	NM_172198	3752	KCND3	potassium channel, voltage gated Shal related subfamily D, member 3		+
ERα_ChIPseq_411	chr1	112531753	112534516	-56	NM_001270945	643355	LOC643355	uncharacterized LOC643355	+	+
ERα_ChIPseq_412	chr1	112618092	112618582	85147	NM_001270945	643355	LOC643355	uncharacterized LOC643355
ERα_ChIPseq_413	chr1	113137076	113137617	24415	NM_001308264	54879	ST7L	suppression of tumorigenicity 7 like		+
ERα_ChIPseq_414	chr1	113256138	113256577	1593	NM_005167	333926	PPM1J	protein phosphatase, Mg2+/Mn2+ dependent, 1J	+
ERα_ChIPseq_415	chr1	113931144	113931656	-2075	NM_001142782	260425	MAGI3	membrane associated guanylate kinase, WW and PDZ domain containing 3
ERα_ChIPseq_416	chr1	114353902	114356262	16	NR_130896	54665	RSBN1	round spermatid basic protein 1		+
ERα_ChIPseq_417	chr1	114518297	114520974	-2378	NM_001286352	56944	OLFML3	olfactomedin like 3	+	+
ERα_ChIPseq_418	chr1	115050075	115055920	784	NM_015906	51592	TRIM33	tripartite motif containing 33		+
ERα_ChIPseq_419	chr1	115721686	115722645	-90044	NM_001308315	10100	TSPAN2	tetraspanin 2	+	+
ERα_ChIPseq_420	chr1	115943588	115943986	-62930	NM_002506	4803	NGF	nerve growth factor (beta polypeptide)
ERα_ChIPseq_421	chr1	115998019	115998540	-117422	NM_002506	4803	NGF	nerve growth factor (beta polypeptide)
ERα_ChIPseq_422	chr1	116207913	116208591	23002	NM_001172412	81839	VANGL1	VANGL planar cell polarity protein 1
ERα_ChIPseq_423	chr1	116255566	116256269	55509	NM_001232	845	CASQ2	calsequestrin 2 (cardiac muscle)	+
ERα_ChIPseq_424	chr1	116358141	116358773	24876	NM_001111061	4808	NHLH2	nescient helix-loop-helix 2	+
ERα_ChIPseq_425	chr1	116495143	116495614	-23741	NM_018420	55356	SLC22A15	solute carrier family 22, member 15
ERα_ChIPseq_426	chr1	116551168	116551840	-31607	NR_125970	101928977	LOC101928977	uncharacterized LOC101928977
ERα_ChIPseq_427	chr1	116832539	116833199	-82926	NM_000701	476	ATP1A1	ATPase, Na+/K+ transporting, alpha 1 polypeptide	+
ERα_ChIPseq_428	chr1	116854746	116855367	-60739	NM_000701	476	ATP1A1	ATPase, Na+/K+ transporting, alpha 1 polypeptide
ERα_ChIPseq_429	chr1	116915350	116916479	119	NM_000701	476	ATP1A1	ATPase, Na+/K+ transporting, alpha 1 polypeptide	+
ERα_ChIPseq_430	chr1	117050680	117052216	-30000	NR_125973	101929023	LOC101929023	uncharacterized LOC101929023
ERα_ChIPseq_431	chr1	117161758	117162291	47554	NM_001542	3321	IGSF3	immunoglobulin superfamily, member 3
ERα_ChIPseq_432	chr1	117195133	117195895	14064	NM_001542	3321	IGSF3	immunoglobulin superfamily, member 3
ERα_ChIPseq_433	chr1	117207093	117207470	2297	NM_001542	3321	IGSF3	immunoglobulin superfamily, member 3
ERα_ChIPseq_434	chr1	117401415	117402073	-50801	NM_020440	5738	PTGFRN	prostaglandin F2 receptor inhibitor	+
ERα_ChIPseq_435	chr1	117422273	117422694	-30062	NM_020440	5738	PTGFRN	prostaglandin F2 receptor inhibitor		+
ERα_ChIPseq_436	chr1	117462417	117462818	10072	NM_020440	5738	PTGFRN	prostaglandin F2 receptor inhibitor	+
ERα_ChIPseq_437	chr1	117505375	117505710	-38830	NM_004258	9398	CD101	CD101 molecule
ERα_ChIPseq_438	chr1	117560565	117561024	16422	NM_001256109	9398	CD101	CD101 molecule	+
ERα_ChIPseq_439	chr1	117724084	117724790	22021	NM_001253849	79679	VTCN1	V-set domain containing T cell activation inhibitor 1
ERα_ChIPseq_440	chr1	117811295	117812093	-26394	NR_126408	104355292	LINC01525	long intergenic non-protein coding RNA 1525	+
ERα_ChIPseq_441	chr1	118132676	118133347	15381	NR_121626	100996263	LOC100996263	uncharacterized LOC100996263		+
ERα_ChIPseq_442	chr1	118389689	118390283	82316	NM_017686	54834	GDAP2	ganglioside induced differentiation associated protein 2		+
ERα_ChIPseq_443	chr1	118659586	118660024	68043	NM_206996	200162	SPAG17	sperm associated antigen 17
ERα_ChIPseq_444	chr1	120561513	120562348	50387	NM_001200001	4853	NOTCH2	notch 2	+	+
ERα_ChIPseq_445	chr1	120574212	120575562	37430	NM_001200001	4853	NOTCH2	notch 2
ERα_ChIPseq_446	chr1	120922702	120923229	12979	NR_045213	2210	FCGR1B	Fc fragment of IgG, high affinity Ib, receptor (CD64)
ERα_ChIPseq_447	chr1	142674034	142674433	39372	NR_046228	100874392	ANKRD20A12P	ankyrin repeat domain 20 family, member A12, pseudogene		+
ERα_ChIPseq_448	chr1	142686195	142686653	27181	NR_046228	100874392	ANKRD20A12P	ankyrin repeat domain 20 family, member A12, pseudogene		+
ERα_ChIPseq_449	chr1	142966984	142967799	234848	NR_110761	102723769	LOC102723769	uncharacterized LOC102723769
ERα_ChIPseq_450	chr1	143182668	143183141	19335	NR_110761	102723769	LOC102723769	uncharacterized LOC102723769
ERα_ChIPseq_451	chr1	143278969	143280167	-77329	NR_110761	102723769	LOC102723769	uncharacterized LOC102723769
ERα_ChIPseq_452	chr1	143660954	143661551	-11669	NR_106967	102466225	MIR6077	microRNA 6077	+
ERα_ChIPseq_453	chr1	144987140	144994705	4111	NM_001002810	9659	PDE4DIP	phosphodiesterase 4D interacting protein	+	+
ERα_ChIPseq_454	chr1	145245532	145247894	37600	NM_203458	388677	NOTCH2NL	notch 2 N-terminal like	+
ERα_ChIPseq_455	chr1	145258135	145260395	-30505	NR_104217	101929780	NBPF25P	neuroblastoma breakpoint family, member 25, pseudogene	+	+
ERα_ChIPseq_456	chr1	145546882	145547457	-2040	NM_001280799	148741	ANKRD35	ankyrin repeat domain 35
ERα_ChIPseq_457	chr1	145668743	145669083	46726	NR_103845	11126	CD160	CD160 molecule
ERα_ChIPseq_458	chr1	145669100	145670225	45977	NR_103845	11126	CD160	CD160 molecule
ERα_ChIPseq_459	chr1	145715378	145715834	33	NR_103845	11126	CD160	CD160 molecule
ERα_ChIPseq_460	chr1	145726232	145727408	-846	NM_001201325	5174	PDZK1	PDZ domain containing 1	+
ERα_ChIPseq_461	chr1	145728390	145728835	946	NM_001201326	5174	PDZK1	PDZ domain containing 1
ERα_ChIPseq_462	chr1	145743834	145744525	16513	NM_001201326	5174	PDZK1	PDZ domain containing 1
ERα_ChIPseq_463	chr1	147141279	147142247	871	NM_016361	51205	ACP6	acid phosphatase 6, lysophosphatidic	+
ERα_ChIPseq_464	chr1	147510145	147511328	-23548	NR_111936	100034743	PDZK1P1	PDZ domain containing 1 pseudogene 1
ERα_ChIPseq_465	chr1	147846255	147846684	-13965	NR_106967	102466225	MIR6077	microRNA 6077
ERα_ChIPseq_466	chr1	147848485	147849233	-11575	NR_106967	102466225	MIR6077	microRNA 6077	+
ERα_ChIPseq_467	chr1	147864522	147864831	4242	NR_106967	102466225	MIR6077	microRNA 6077
ERα_ChIPseq_468	chr1	147999834	148000763	6152	NR_104086	101954277	RNVU1-19	RNA, variant U1 small nuclear 19		+
ERα_ChIPseq_469	chr1	148233241	148233560	-30864	NM_001164261	645142	PPIAL4D	peptidylprolyl isomerase A (cyclophilin A)-like 4D
ERα_ChIPseq_470	chr1	148241219	148241947	-39047	NM_001164261	645142	PPIAL4D	peptidylprolyl isomerase A (cyclophilin A)-like 4D	+
ERα_ChIPseq_471	chr1	148604577	148605243	44063	NM_173638	284565	NBPF15	neuroblastoma breakpoint family, member 15
ERα_ChIPseq_472	chr1	149209553	149209756	-77476	NR_111933	388692	LOC388692	uncharacterized LOC388692	+
ERα_ChIPseq_473	chr1	149223056	149225062	-63071	NR_111933	388692	LOC388692	uncharacterized LOC388692	+
ERα_ChIPseq_474	chr1	149362426	149362805	-6679	NR_027484	100132417	FCGR1C	Fc fragment of IgG, high affinity Ic, receptor (CD64), pseudogene	+
ERα_ChIPseq_475	chr1	149381964	149382455	12915	NR_027484	100132417	FCGR1C	Fc fragment of IgG, high affinity Ic, receptor (CD64), pseudogene
ERα_ChIPseq_476	chr1	149766938	149767515	12976	NM_000566	2209	FCGR1A	Fc fragment of IgG, high affinity Ia, receptor (CD64)
ERα_ChIPseq_477	chr1	149989179	149989903	-6855	NM_020205	56957	OTUD7B	OTU deubiquitinase 7B	+	+
ERα_ChIPseq_478	chr1	150943653	150944614	3346	NM_022075	29956	CERS2	ceramide synthase 2
ERα_ChIPseq_479	chr1	150953913	150954932	-77	NM_003568	8416	ANXA9	annexin A9
ERα_ChIPseq_480	chr1	150976179	150977042	2663	NM_001163260	55793	FAM63A	family with sequence similarity 63, member A	+
ERα_ChIPseq_481	chr1	150978218	150978865	732	NM_001163260	55793	FAM63A	family with sequence similarity 63, member A
ERα_ChIPseq_482	chr1	150980224	150981334	75	NM_001163258	55793	FAM63A	family with sequence similarity 63, member A	+
ERα_ChIPseq_483	chr1	151020293	151021041	408	NM_017860	54964	C1orf56	chromosome 1 open reading frame 56	+
ERα_ChIPseq_484	chr1	151263686	151264320	9215	NM_020832	57592	ZNF687	zinc finger protein 687
ERα_ChIPseq_485	chr1	151445656	151446155	-13964	NM_001194938	23126	POGZ	pogo transposable element with ZNF domain		+
ERα_ChIPseq_486	chr1	151486076	151486906	2629	NM_020770	57530	CGN	cingulin
ERα_ChIPseq_487	chr1	151849164	151849817	-23317	NM_182578	284486	THEM5	thioesterase superfamily member 5
ERα_ChIPseq_488	chr1	151941232	151941975	25111	NM_002966	6281	S100A10	S100 calcium binding protein A10	+
ERα_ChIPseq_489	chr1	151966102	151967127	100	NM_002966	6281	S100A10	S100 calcium binding protein A10
ERα_ChIPseq_490	chr1	152162515	152163194	-31150	NM_001122965	126638	RPTN	repetin
ERα_ChIPseq_491	chr1	152715614	152716039	-14680	NM_001025231	448834	KPRP	keratinocyte proline-rich protein	+
ERα_ChIPseq_492	chr1	153215552	153215933	-16437	NM_000427	4014	LOR	loricrin
ERα_ChIPseq_493	chr1	153451053	153451654	-18216	NM_002963	6278	S100A7	S100 calcium binding protein A7		+
ERα_ChIPseq_494	chr1	153483379	153483995	25030	NM_014624	6277	S100A6	S100 calcium binding protein A6	+
ERα_ChIPseq_495	chr1	153492614	153493334	15743	NM_014624	6277	S100A6	S100 calcium binding protein A6	+
ERα_ChIPseq_496	chr1	153493454	153494004	14988	NM_014624	6277	S100A6	S100 calcium binding protein A6
ERα_ChIPseq_497	chr1	153512908	153513321	1127	NM_002962	6276	S100A5	S100 calcium binding protein A5
ERα_ChIPseq_498	chr1	153581361	153581942	180	NM_001317008	140576	S100A16	S100 calcium binding protein A16
ERα_ChIPseq_499	chr1	153582748	153583224	-1155	NM_001317007	140576	S100A16	S100 calcium binding protein A16		+
ERα_ChIPseq_500	chr1	153680840	153681387	-18844	NR_107050	102466879	MIR8083	microRNA 8083
ERα_ChIPseq_501	chr1	153700925	153701346	568	NM_023015	65123	INTS3	integrator complex subunit 3
ERα_ChIPseq_502	chr1	154129930	154130254	-2500	NM_207308	91181	NUP210L	nucleoporin 210kDa like
ERα_ChIPseq_503	chr1	154162936	154163504	1323	NR_103460	7170	TPM3	tropomyosin 3	+
ERα_ChIPseq_504	chr1	154847665	154848091	-5124	NM_002249	3782	KCNN3	potassium channel, calcium activated intermediate/small conductance subfamily N alpha, member 3	+
ERα_ChIPseq_505	chr1	154973083	154973802	-1664	NR_049765	51043	ZBTB7B	zinc finger and BTB domain containing 7B
ERα_ChIPseq_506	chr1	154976344	154976744	1438	NM_001252406	51043	ZBTB7B	zinc finger and BTB domain containing 7B
ERα_ChIPseq_507	chr1	154977833	154978388	3004	NM_001252406	51043	ZBTB7B	zinc finger and BTB domain containing 7B
ERα_ChIPseq_508	chr1	155063414	155063992	12355	NM_004952	1944	EFNA3	ephrin-A3
ERα_ChIPseq_509	chr1	155149567	155150208	2657	NR_046329	80128	TRIM46	tripartite motif containing 46	+
ERα_ChIPseq_510	chr1	155160784	155162090	1269	NM_001204289	4582	MUC1	mucin 1, cell surface associated	+
ERα_ChIPseq_511	chr1	155428321	155428669	25524	NR_034180	645682	POU5F1P4	POU class 5 homeobox 1 pseudogene 4
ERα_ChIPseq_512	chr1	155799222	155799527	27712	NM_001282860	54856	GON4L	gon-4-like (C. elegans)	+
ERα_ChIPseq_513	chr1	155947842	155948350	-130	NM_004723	9181	ARHGEF2	Rho/Rac guanine nucleotide exchange factor 2
ERα_ChIPseq_514	chr1	156252064	156252486	345	NM_015327	23381	SMG5	SMG5 nonsense mediated mRNA decay factor	+
ERα_ChIPseq_515	chr1	156586132	156586786	-2627	NM_021817	60484	HAPLN2	hyaluronan and proteoglycan link protein 2	+
ERα_ChIPseq_516	chr1	156955454	156956006	-49694	NR_030527	768220	MIR765	microRNA 765		+
ERα_ChIPseq_517	chr1	157101707	157102387	3893	NR_001560	360155	CYCSP52	cytochrome c, somatic pseudogene 52	+
ERα_ChIPseq_518	chr1	160031309	160031541	8626	NM_002241	3766	KCNJ10	potassium channel, inwardly rectifying subfamily J, member 10	+
ERα_ChIPseq_519	chr1	161413546	161414123	-61371	NM_021642	2212	FCGR2A	Fc fragment of IgG, low affinity IIa, receptor (CD32)
ERα_ChIPseq_520	chr1	161431358	161432205	-43424	NM_021642	2212	FCGR2A	Fc fragment of IgG, low affinity IIa, receptor (CD32)
ERα_ChIPseq_521	chr1	161438805	161439678	-35964	NM_021642	2212	FCGR2A	Fc fragment of IgG, low affinity IIa, receptor (CD32)
ERα_ChIPseq_522	chr1	161536006	161536435	-14909	NM_201563	9103	FCGR2C	Fc fragment of IgG, low affinity IIc, receptor for (CD32) (gene/pseudogene)
ERα_ChIPseq_523	chr1	161558509	161559095	7673	NR_047648	9103	FCGR2C	Fc fragment of IgG, low affinity IIc, receptor for (CD32) (gene/pseudogene)	+
ERα_ChIPseq_524	chr1	161617573	161617922	-15158	NM_001190828	2213	FCGR2B	Fc fragment of IgG, low affinity IIb, receptor (CD32)
ERα_ChIPseq_525	chr1	161640344	161640919	7726	NM_001002275	2213	FCGR2B	Fc fragment of IgG, low affinity IIb, receptor (CD32)	+
ERα_ChIPseq_526	chr1	162121909	162122604	-4641	NR_039798	100616386	MIR4654	microRNA 4654
ERα_ChIPseq_527	chr1	162129138	162129814	2579	NR_039798	100616386	MIR4654	microRNA 4654	+
ERα_ChIPseq_528	chr1	162135289	162136173	8834	NR_039798	100616386	MIR4654	microRNA 4654	+
ERα_ChIPseq_529	chr1	162254945	162255605	-57061	NR_030283	693141	MIR556	microRNA 556
ERα_ChIPseq_530	chr1	162358235	162358613	6904	NM_001085375	400793	C1orf226	chromosome 1 open reading frame 226	+	+
ERα_ChIPseq_531	chr1	164567906	164568376	39544	NM_002585	5087	PBX1	pre-B-cell leukemia homeobox 1
ERα_ChIPseq_532	chr1	164676108	164676589	67530	NR_038072	100505795	LOC100505795	uncharacterized LOC100505795
ERα_ChIPseq_533	chr1	164685524	164685859	58187	NR_038072	100505795	LOC100505795	uncharacterized LOC100505795
ERα_ChIPseq_534	chr1	164717368	164718344	26022	NR_038072	100505795	LOC100505795	uncharacterized LOC100505795	+	+
ERα_ChIPseq_535	chr1	164726818	164727365	16787	NR_038072	100505795	LOC100505795	uncharacterized LOC100505795	+
ERα_ChIPseq_536	chr1	164742067	164742406	1642	NR_038072	100505795	LOC100505795	uncharacterized LOC100505795
ERα_ChIPseq_537	chr1	165297334	165297757	27933	NM_001174069	4009	LMX1A	LIM homeobox transcription factor 1, alpha
ERα_ChIPseq_538	chr1	166165544	166165874	-29751	NM_001017961	149297	FAM78B	family with sequence similarity 78, member B
ERα_ChIPseq_539	chr1	166572326	166573092	-444	NR_002925	116123	FMO9P	flavin containing monooxygenase 9 pseudogene
ERα_ChIPseq_540	chr1	168600836	168601285	55349	NM_002995	6375	XCL1	chemokine (C motif) ligand 1
ERα_ChIPseq_541	chr1	168876177	168876887	120353	NR_024160	79100	LINC00626	long intergenic non-protein coding RNA 626	+
ERα_ChIPseq_542	chr1	169486572	169487266	-31711	NM_006996	10560	SLC19A2	solute carrier family 19 (thiamine transporter), member 2
ERα_ChIPseq_543	chr1	169498441	169499085	-43555	NM_006996	10560	SLC19A2	solute carrier family 19 (thiamine transporter), member 2		+
ERα_ChIPseq_544	chr1	169749195	169749749	14589	NM_033418	92342	METTL18	methyltransferase like 18
ERα_ChIPseq_545	chr1	171534150	171534620	79719	NM_015172	23215	PRRC2C	proline-rich coiled-coil 2C	+
ERα_ChIPseq_546	chr1	172417890	172418464	-3856	NM_001300760	92346	C1orf105	chromosome 1 open reading frame 105
ERα_ChIPseq_547	chr1	172498982	172499663	-2167	NM_016227	51430	SUCO	SUN domain containing ossification factor		+
ERα_ChIPseq_548	chr1	172599905	172600310	-28041	NM_001302746	356	FASLG	Fas ligand (TNF superfamily, member 6)	+
ERα_ChIPseq_549	chr1	172715504	172716176	87692	NM_000639	356	FASLG	Fas ligand (TNF superfamily, member 6)
ERα_ChIPseq_550	chr1	172889936	172890428	129921	NM_005092	8995	TNFSF18	tumor necrosis factor (ligand) superfamily, member 18
ERα_ChIPseq_551	chr1	173837333	173837924	135	NM_032522	84614	ZBTB37	zinc finger and BTB domain containing 37	+	+
ERα_ChIPseq_552	chr1	176721608	176722235	276660	NR_030163	574441	MIR488	microRNA 488
ERα_ChIPseq_553	chr1	177270385	177270820	-50120	NR_126001	102724661	LOC102724661	uncharacterized LOC102724661		+
ERα_ChIPseq_554	chr1	177409917	177410455	89464	NR_126001	102724661	LOC102724661	uncharacterized LOC102724661		+
ERα_ChIPseq_555	chr1	177417704	177418384	97322	NR_126001	102724661	LOC102724661	uncharacterized LOC102724661	+
ERα_ChIPseq_556	chr1	177540776	177541385	-128579	NR_110722	101928778	LOC101928778	uncharacterized LOC101928778
ERα_ChIPseq_557	chr1	177554722	177555300	-114648	NR_110722	101928778	LOC101928778	uncharacterized LOC101928778		+
ERα_ChIPseq_558	chr1	177588218	177588589	-81256	NR_110722	101928778	LOC101928778	uncharacterized LOC101928778
ERα_ChIPseq_559	chr1	177589741	177590189	-79694	NR_110722	101928778	LOC101928778	uncharacterized LOC101928778
ERα_ChIPseq_560	chr1	178624593	178625263	-21956	NR_039622	100616328	MIR4424	microRNA 4424	+
ERα_ChIPseq_561	chr1	178694889	178695445	885	NM_152663	55103	RALGPS2	Ral GEF with PH domain and SH3 binding motif 2	+
ERα_ChIPseq_562	chr1	179341252	179341809	6423	NR_073544	126859	AXDND1	axonemal dynein light chain domain containing 1	+
ERα_ChIPseq_563	chr1	179807683	179808122	39039	NM_022347	163590	TOR1AIP2	torsin A interacting protein 2
ERα_ChIPseq_564	chr1	180136624	180137603	13145	NM_001004128	5768	QSOX1	quiescin Q6 sulfhydryl oxidase 1
ERα_ChIPseq_565	chr1	180197518	180198036	-1656	NM_033343	89884	LHX4	LIM homeobox 4	+	+
ERα_ChIPseq_566	chr1	180513034	180513424	-14881	NR_125716	148756	OVAAL	ovarian adenocarcinoma amplified long non-coding RNA
ERα_ChIPseq_567	chr1	181086691	181087289	29352	NM_016545	51278	IER5	immediate early response 5
ERα_ChIPseq_568	chr1	181095938	181096606	38634	NM_016545	51278	IER5	immediate early response 5
ERα_ChIPseq_569	chr1	182056839	182057553	-26349	NM_001009992	127665	ZNF648	zinc finger protein 648
ERα_ChIPseq_570	chr1	182065192	182065644	-34571	NM_001009992	127665	ZNF648	zinc finger protein 648
ERα_ChIPseq_571	chr1	182110098	182110543	-79473	NM_001009992	127665	ZNF648	zinc finger protein 648		+
ERα_ChIPseq_572	chr1	182213523	182214064	69403	NR_104175	400799	LINC01344	long intergenic non-protein coding RNA 1344
ERα_ChIPseq_573	chr1	182284223	182284682	-1256	NR_104175	400799	LINC01344	long intergenic non-protein coding RNA 1344	+	+
ERα_ChIPseq_574	chr1	182601312	182602077	17419	NR_036490	284648	LOC284648	uncharacterized LOC284648
ERα_ChIPseq_575	chr1	182602610	182603559	18809	NR_036490	284648	LOC284648	uncharacterized LOC284648
ERα_ChIPseq_576	chr1	182615290	182615923	26461	NM_033345	85397	RGS8	regulator of G-protein signaling 8
ERα_ChIPseq_577	chr1	182992826	182993526	581	NM_002293	3915	LAMC1	laminin, gamma 1 (formerly LAMB2)
ERα_ChIPseq_578	chr1	183218451	183219010	55279	NM_170706	23057	NMNAT2	nicotinamide nucleotide adenylyltransferase 2
ERα_ChIPseq_579	chr1	184125566	184126028	105012	NR_125335	116461	TSEN15	TSEN15 tRNA splicing endonuclease subunit
ERα_ChIPseq_580	chr1	184342275	184342759	-13633	NM_030806	81563	C1orf21	chromosome 1 open reading frame 21	+
ERα_ChIPseq_581	chr1	184377542	184378139	21690	NM_030806	81563	C1orf21	chromosome 1 open reading frame 21
ERα_ChIPseq_582	chr1	184452041	184452637	96189	NM_030806	81563	C1orf21	chromosome 1 open reading frame 21		+
ERα_ChIPseq_583	chr1	184516715	184517349	160882	NM_030806	81563	C1orf21	chromosome 1 open reading frame 21
ERα_ChIPseq_584	chr1	184536951	184537345	180998	NM_030806	81563	C1orf21	chromosome 1 open reading frame 21
ERα_ChIPseq_585	chr1	184595659	184596249	128087	NM_025191	80267	EDEM3	ER degradation enhancer, mannosidase alpha-like 3	+
ERα_ChIPseq_586	chr1	184601884	184602365	121917	NM_025191	80267	EDEM3	ER degradation enhancer, mannosidase alpha-like 3
ERα_ChIPseq_587	chr1	185296186	185296665	7746	NR_038424	100288079	GS1-279B7.1	microtubule-associated protein 1 light chain 3 beta pseudogene
ERα_ChIPseq_588	chr1	185614669	185615124	-17276	NR_110793	101929093	LINC01350	long intergenic non-protein coding RNA 1350	+
ERα_ChIPseq_589	chr1	185684799	185685296	-18636	NM_031935	83872	HMCN1	hemicentin 1	+
ERα_ChIPseq_590	chr1	186121588	186122664	-143279	NM_001127709	10216	PRG4	proteoglycan 4
ERα_ChIPseq_591	chr1	186200862	186201503	-64223	NM_001127709	10216	PRG4	proteoglycan 4	+
ERα_ChIPseq_592	chr1	186276082	186276797	11034	NM_001127708	10216	PRG4	proteoglycan 4
ERα_ChIPseq_593	chr1	186503113	186503515	-56659	NR_031642	100302192	MIR548F1	microRNA 548f-1
ERα_ChIPseq_594	chr1	187282310	187282792	-130209	NR_132374	106144535	LINC01037	long intergenic non-protein coding RNA 1037	+
ERα_ChIPseq_595	chr1	187328677	187329056	-83894	NR_132374	106144535	LINC01037	long intergenic non-protein coding RNA 1037
ERα_ChIPseq_596	chr1	187350565	187351114	-61921	NR_132374	106144535	LINC01037	long intergenic non-protein coding RNA 1037	+
ERα_ChIPseq_597	chr1	187377423	187378011	-35043	NR_132374	106144535	LINC01037	long intergenic non-protein coding RNA 1037
ERα_ChIPseq_598	chr1	187460421	187460907	47904	NR_132374	106144535	LINC01037	long intergenic non-protein coding RNA 1037
ERα_ChIPseq_599	chr1	188401417	188402285	989091	NR_132374	106144535	LINC01037	long intergenic non-protein coding RNA 1037	+
ERα_ChIPseq_600	chr1	188484437	188484968	1071942	NR_132374	106144535	LINC01037	long intergenic non-protein coding RNA 1037	+
ERα_ChIPseq_601	chr1	189688834	189689289	757698	NM_199051	339479	BRINP3	bone morphogenetic protein/retinoic acid inducible neural-specific 3	+
ERα_ChIPseq_602	chr1	189709769	189710333	736708	NM_199051	339479	BRINP3	bone morphogenetic protein/retinoic acid inducible neural-specific 3	+
ERα_ChIPseq_603	chr1	190254182	190254760	192288	NM_199051	339479	BRINP3	bone morphogenetic protein/retinoic acid inducible neural-specific 3
ERα_ChIPseq_604	chr1	191122044	191122677	528340	NR_033922	440704	LOC440704	uncharacterized LOC440704
ERα_ChIPseq_605	chr1	191124304	191124895	530579	NR_033922	440704	LOC440704	uncharacterized LOC440704
ERα_ChIPseq_606	chr1	191396653	191397262	-730635	NM_130782	64407	RGS18	regulator of G-protein signaling 18	+
ERα_ChIPseq_607	chr1	191671214	191671725	-456123	NM_130782	64407	RGS18	regulator of G-protein signaling 18
ERα_ChIPseq_608	chr1	192548223	192548654	3581	NM_002922	5996	RGS1	regulator of G-protein signaling 1
ERα_ChIPseq_609	chr1	193777864	193778385	504249	NR_125789	101929184	LINC01031	long intergenic non-protein coding RNA 1031
ERα_ChIPseq_610	chr1	193888840	193889373	615231	NR_125789	101929184	LINC01031	long intergenic non-protein coding RNA 1031	+
ERα_ChIPseq_611	chr1	194899276	194899793	1625659	NR_125789	101929184	LINC01031	long intergenic non-protein coding RNA 1031
ERα_ChIPseq_612	chr1	195043067	195043696	1508230	NR_039888	100616363	MIR4735	microRNA 4735		+
ERα_ChIPseq_613	chr1	197454774	197455736	217921	NR_047564	23418	CRB1	crumbs family member 1, photoreceptor morphogenesis associated	+
ERα_ChIPseq_614	chr1	198624576	198625173	16776	NM_002838	5788	PTPRC	protein tyrosine phosphatase, receptor type, C
ERα_ChIPseq_615	chr1	199964204	199964549	-32354	NM_003822	2494	NR5A2	nuclear receptor subfamily 5, group A, member 2
ERα_ChIPseq_616	chr1	199985637	199986411	-10706	NM_003822	2494	NR5A2	nuclear receptor subfamily 5, group A, member 2	+
ERα_ChIPseq_617	chr1	200083630	200084212	71968	NM_001276464	2494	NR5A2	nuclear receptor subfamily 5, group A, member 2
ERα_ChIPseq_618	chr1	200306242	200306765	36417	NR_040064	554279	LINC00862	long intergenic non-protein coding RNA 862
ERα_ChIPseq_619	chr1	200448563	200449149	-69670	NM_012482	23528	ZNF281	zinc finger protein 281
ERα_ChIPseq_620	chr1	200509160	200510021	78376	NM_001305792	9928	KIF14	kinesin family member 14
ERα_ChIPseq_621	chr1	200858020	200858613	-2311	NM_018265	55765	C1orf106	chromosome 1 open reading frame 106		+
ERα_ChIPseq_622	chr1	201014195	201014580	-21559	NM_001252102	23046	KIF21B	kinesin family member 21B	+
ERα_ChIPseq_623	chr1	201178642	201180087	19411	NM_001164586	91156	IGFN1	immunoglobulin-like and fibronectin type III domain containing 1		+
ERα_ChIPseq_624	chr1	201180119	201180552	20382	NM_001164586	91156	IGFN1	immunoglobulin-like and fibronectin type III domain containing 1
ERα_ChIPseq_625	chr1	201180673	201181213	20990	NM_001164586	91156	IGFN1	immunoglobulin-like and fibronectin type III domain containing 1		+
ERα_ChIPseq_626	chr1	201183509	201183849	23726	NM_001164586	91156	IGFN1	immunoglobulin-like and fibronectin type III domain containing 1
ERα_ChIPseq_627	chr1	201223459	201224217	-28742	NM_001005337	5317	PKP1	plakophilin 1	+
ERα_ChIPseq_628	chr1	201255513	201256041	3197	NM_000299	5317	PKP1	plakophilin 1
ERα_ChIPseq_629	chr1	201322148	201323028	24240	NM_001276346	7139	TNNT2	troponin T type 2 (cardiac)	+
ERα_ChIPseq_630	chr1	201647779	201648310	30594	NM_020443	89796	NAV1	neuron navigator 1
ERα_ChIPseq_631	chr1	201710785	201711435	2147	NM_001167738	89796	NAV1	neuron navigator 1
ERα_ChIPseq_632	chr1	201986732	201987316	7334	NM_001114309	1999	ELF3	E74-like factor 3 (ets domain transcription factor, epithelial-specific )	+
ERα_ChIPseq_633	chr1	201987455	201988318	8196	NM_001114309	1999	ELF3	E74-like factor 3 (ets domain transcription factor, epithelial-specific )	+
ERα_ChIPseq_634	chr1	201992082	201992728	12715	NM_001114309	1999	ELF3	E74-like factor 3 (ets domain transcription factor, epithelial-specific )
ERα_ChIPseq_635	chr1	202015180	202015844	35822	NM_001114309	1999	ELF3	E74-like factor 3 (ets domain transcription factor, epithelial-specific )
ERα_ChIPseq_636	chr1	202025868	202026812	46650	NM_001114309	1999	ELF3	E74-like factor 3 (ets domain transcription factor, epithelial-specific )
ERα_ChIPseq_637	chr1	202027159	202028361	48070	NM_001114309	1999	ELF3	E74-like factor 3 (ets domain transcription factor, epithelial-specific )	+
ERα_ChIPseq_638	chr1	202039328	202039949	-52391	NM_004767	9283	GPR37L1	G protein-coupled receptor 37 like 1	+
ERα_ChIPseq_639	chr1	202044546	202044928	-47292	NM_004767	9283	GPR37L1	G protein-coupled receptor 37 like 1
ERα_ChIPseq_640	chr1	202054098	202054910	-37525	NM_004767	9283	GPR37L1	G protein-coupled receptor 37 like 1
ERα_ChIPseq_641	chr1	202075302	202076177	-16290	NM_004767	9283	GPR37L1	G protein-coupled receptor 37 like 1		+
ERα_ChIPseq_642	chr1	202076272	202078274	-14756	NM_004767	9283	GPR37L1	G protein-coupled receptor 37 like 1	+
ERα_ChIPseq_643	chr1	202081543	202082636	-9940	NM_004767	9283	GPR37L1	G protein-coupled receptor 37 like 1	+
ERα_ChIPseq_644	chr1	202100829	202102321	9546	NM_004767	9283	GPR37L1	G protein-coupled receptor 37 like 1	+
ERα_ChIPseq_645	chr1	202111952	202112635	1578	NM_138795	127829	ARL8A	ADP-ribosylation factor like GTPase 8A
ERα_ChIPseq_646	chr1	202153769	202154754	-8857	NM_001017403	59352	LGR6	leucine-rich repeat containing G protein-coupled receptor 6
ERα_ChIPseq_647	chr1	202173511	202174789	1245	NM_021636	59352	LGR6	leucine-rich repeat containing G protein-coupled receptor 6
ERα_ChIPseq_648	chr1	202304233	202305053	6451	NM_014176	29089	UBE2T	ubiquitin conjugating enzyme E2T	+
ERα_ChIPseq_649	chr1	202501120	202501632	-7866	NM_001197131	4660	PPP1R12B	protein phosphatase 1, regulatory subunit 12B	+	+
ERα_ChIPseq_650	chr1	202593110	202593694	19179	NM_001136504	127833	SYT2	synaptotagmin II
ERα_ChIPseq_651	chr1	202593970	202594687	18253	NM_001136504	127833	SYT2	synaptotagmin II
ERα_ChIPseq_652	chr1	202719137	202719748	-39891	NM_177402	127833	SYT2	synaptotagmin II	+
ERα_ChIPseq_653	chr1	202830825	202831349	205	NR_002929	148709	LOC148709	actin pseudogene	+	+
ERα_ChIPseq_654	chr1	203028430	203028938	26482	NM_002479	4656	MYOG	myogenin (myogenic factor 4)
ERα_ChIPseq_655	chr1	203058171	203059094	-3466	NM_002479	4656	MYOG	myogenin (myogenic factor 4)	+
ERα_ChIPseq_656	chr1	203100764	203101237	4164	NM_001048230	134	ADORA1	adenosine A1 receptor	+
ERα_ChIPseq_657	chr1	203114846	203115262	18218	NM_001048230	134	ADORA1	adenosine A1 receptor
ERα_ChIPseq_658	chr1	203153956	203154480	1704	NM_001276	1116	CHI3L1	chitinase 3-like 1 (cartilage glycoprotein-39)	+
ERα_ChIPseq_659	chr1	203258288	203259146	1889	NR_117098	100506775	LINC01353	long intergenic non-protein coding RNA 1353		+
ERα_ChIPseq_660	chr1	203469012	203469925	6197	NM_014359	26254	OPTC	opticin
ERα_ChIPseq_661	chr1	203488505	203489085	25524	NM_014359	26254	OPTC	opticin	+
ERα_ChIPseq_662	chr1	203572829	203573645	-22678	NM_001001396	493	ATP2B4	ATPase, Ca++ transporting, plasma membrane 4		+
ERα_ChIPseq_663	chr1	203574432	203575010	-21194	NM_001001396	493	ATP2B4	ATPase, Ca++ transporting, plasma membrane 4	+	+
ERα_ChIPseq_664	chr1	203830470	203831071	57	NM_003094	6635	SNRPE	small nuclear ribonucleoprotein polypeptide E		+
ERα_ChIPseq_665	chr1	204073063	204073705	31138	NM_005686	9580	SOX13	SRY box 13
ERα_ChIPseq_666	chr1	204110320	204110785	16	NR_123739	101929441	LOC101929441	uncharacterized LOC101929441	+
ERα_ChIPseq_667	chr1	204349487	204350075	-10934	NR_027022	127841	LINC00628	long intergenic non-protein coding RNA 628	+	+
ERα_ChIPseq_668	chr1	204386545	204387384	-6019	NM_032833	84919	PPP1R15B	protein phosphatase 1, regulatory subunit 15B		+
ERα_ChIPseq_669	chr1	204542171	204542706	56931	NM_001278517	4194	MDM4	MDM4, p53 regulator
ERα_ChIPseq_670	chr1	204616260	204616801	37951	NM_006338	10446	LRRN2	leucine rich repeat neuronal 2
ERα_ChIPseq_671	chr1	204732573	204733321	-64835	NM_015090	23114	NFASC	neurofascin
ERα_ChIPseq_672	chr1	205505346	205505779	20201	NR_027086	284578	LOC284578	uncharacterized LOC284578
ERα_ChIPseq_673	chr1	205544580	205545042	6699	NM_181644	148808	MFSD4	major facilitator superfamily domain containing 4
ERα_ChIPseq_674	chr1	205621844	205622475	-20159	NM_021795	2005	ELK4	ELK4, ETS-domain protein (SRF accessory protein 1)	+
ERα_ChIPseq_675	chr1	205638715	205639338	10604	NM_033102	85414	SLC45A3	solute carrier family 45, member 3	+
ERα_ChIPseq_676	chr1	205719435	205720067	-379	NM_022731	64710	NUCKS1	nuclear casein kinase and cyclin-dependent kinase substrate 1
ERα_ChIPseq_677	chr1	205863979	205864715	33140	NR_046097	284581	LOC284581	uncharacterized LOC284581	+	+
ERα_ChIPseq_678	chr1	207076849	207077525	6399	NM_006850	11009	IL24	interleukin 24	+
ERα_ChIPseq_679	chr1	207414699	207415295	-79820	NM_000574	1604	CD55	CD55 molecule, decay accelerating factor for complement (Cromer blood group)
ERα_ChIPseq_680	chr1	207720096	207720578	50864	NM_000573	1378	CR1	complement component (3b/4b) receptor 1 (Knops blood group)
ERα_ChIPseq_681	chr1	209719739	209720063	-37144	NM_020439	57172	CAMK1G	calcium/calmodulin-dependent protein kinase IG	+
ERα_ChIPseq_682	chr1	209761494	209761887	4645	NM_020439	57172	CAMK1G	calcium/calmodulin-dependent protein kinase IG
ERα_ChIPseq_683	chr1	210540182	210540639	37770	NM_001170580	55733	HHAT	hedgehog acyltransferase	+
ERα_ChIPseq_684	chr1	211286942	211287431	20271	NM_002238	3756	KCNH1	potassium channel, voltage gated eag related subfamily H, member 1		+
ERα_ChIPseq_685	chr1	211432022	211432716	-339	NM_001136224	55758	RCOR3	REST corepressor 3
ERα_ChIPseq_686	chr1	211675707	211676181	-9685	NM_183059	343035	RD3	retinal degeneration 3	+
ERα_ChIPseq_687	chr1	211694762	211695178	-28711	NM_183059	343035	RD3	retinal degeneration 3	+	+
ERα_ChIPseq_688	chr1	212251342	212251874	653	NR_036068	100422947	MIR3122	microRNA 3122
ERα_ChIPseq_689	chr1	212295070	212295421	44290	NR_036068	100422947	MIR3122	microRNA 3122
ERα_ChIPseq_690	chr1	212311712	212312462	61132	NR_036068	100422947	MIR3122	microRNA 3122	+
ERα_ChIPseq_691	chr1	212640270	212640675	34243	NM_013349	29937	NENF	neudesin neurotrophic factor
ERα_ChIPseq_692	chr1	213248387	213248771	24004	NM_001287219	26750	RPS6KC1	ribosomal protein S6 kinase, 52kDa, polypeptide 1	+
ERα_ChIPseq_693	chr1	213743825	213744275	-354042	NR_046189	100861504	LINC00538	long intergenic non-protein coding RNA 538
ERα_ChIPseq_694	chr1	214500820	214501258	46474	NM_020197	56950	SMYD2	SET and MYND domain containing 2	+
ERα_ChIPseq_695	chr1	214873613	214874181	97365	NM_016343	1063	CENPF	centromere protein F
ERα_ChIPseq_696	chr1	215271360	215271968	15104	NM_014217	3776	KCNK2	potassium channel, two pore domain subfamily K, member 2
ERα_ChIPseq_697	chr1	215598329	215598969	-142086	NM_016121	51133	KCTD3	potassium channel tetramerization domain containing 3	+
ERα_ChIPseq_698	chr1	215647090	215647687	-93347	NM_016121	51133	KCTD3	potassium channel tetramerization domain containing 3
ERα_ChIPseq_699	chr1	215648872	215649977	-91311	NM_016121	51133	KCTD3	potassium channel tetramerization domain containing 3
ERα_ChIPseq_700	chr1	215655189	215656022	-85130	NM_016121	51133	KCTD3	potassium channel tetramerization domain containing 3
ERα_ChIPseq_701	chr1	215713388	215714070	-27006	NM_016121	51133	KCTD3	potassium channel tetramerization domain containing 3
ERα_ChIPseq_702	chr1	217297676	217298268	13125	NM_001243511	2104	ESRRG	estrogen-related receptor gamma	+
ERα_ChIPseq_703	chr1	217299336	217299903	11478	NM_001243511	2104	ESRRG	estrogen-related receptor gamma	+
ERα_ChIPseq_704	chr1	217536399	217536936	-225570	NM_001243510	2104	ESRRG	estrogen-related receptor gamma	+
ERα_ChIPseq_705	chr1	217712464	217713071	91677	NM_018040	55105	GPATCH2	G-patch domain containing 2
ERα_ChIPseq_706	chr1	217729966	217730838	74042	NM_018040	55105	GPATCH2	G-patch domain containing 2	+
ERα_ChIPseq_707	chr1	218610243	218610708	-500	NR_031644	100302159	MIR548F3	microRNA 548f-3
ERα_ChIPseq_708	chr1	218653704	218654621	38194	NR_125715	103611157	TGFB2-OT1	TGFB2 overlapping transcript 1
ERα_ChIPseq_709	chr1	218769674	218770049	153893	NR_125715	103611157	TGFB2-OT1	TGFB2 overlapping transcript 1
ERα_ChIPseq_710	chr1	218771536	218771929	155764	NR_125715	103611157	TGFB2-OT1	TGFB2 overlapping transcript 1
ERα_ChIPseq_711	chr1	219834428	219834866	-211972	NR_002753	26828	RNU5F-1	RNA, U5F small nuclear 1	+
ERα_ChIPseq_712	chr1	222023757	222024225	-9983	NR_125989	101929771	LOC101929771	uncharacterized LOC101929771
ERα_ChIPseq_713	chr1	222121069	222121533	-107293	NR_125989	101929771	LOC101929771	uncharacterized LOC101929771
ERα_ChIPseq_714	chr1	222131422	222131895	-117650	NR_125989	101929771	LOC101929771	uncharacterized LOC101929771
ERα_ChIPseq_715	chr1	222134958	222135414	-121178	NR_125989	101929771	LOC101929771	uncharacterized LOC101929771
ERα_ChIPseq_716	chr1	223322436	223322886	-6037	NM_003268	7100	TLR5	toll-like receptor 5		+
ERα_ChIPseq_717	chr1	223350949	223351368	-34534	NM_003268	7100	TLR5	toll-like receptor 5	+
ERα_ChIPseq_718	chr1	223385673	223386387	-69406	NM_003268	7100	TLR5	toll-like receptor 5	+
ERα_ChIPseq_719	chr1	223492686	223493120	44641	NM_017982	55061	SUSD4	sushi domain containing 4
ERα_ChIPseq_720	chr1	223617807	223618281	51329	NM_152610	164127	CCDC185	coiled-coil domain containing 185
ERα_ChIPseq_721	chr1	223842767	223843398	10354	NM_001143962	388743	CAPN8	calpain 8	+
ERα_ChIPseq_722	chr1	223871063	223871517	-17854	NM_001143962	388743	CAPN8	calpain 8
ERα_ChIPseq_723	chr1	223888655	223889050	-443	NM_001146068	824	CAPN2	calpain 2, (m/II) large subunit	+
ERα_ChIPseq_724	chr1	224048033	224048346	-14515	NM_005426	7159	TP53BP2	tumor protein p53 binding protein 2
ERα_ChIPseq_725	chr1	224392638	224392884	8220	NR_110669	101927143	LOC101927143	uncharacterized LOC101927143
ERα_ChIPseq_726	chr1	224393084	224393434	7722	NR_110669	101927143	LOC101927143	uncharacterized LOC101927143
ERα_ChIPseq_727	chr1	224400130	224400580	626	NR_110669	101927143	LOC101927143	uncharacterized LOC101927143
ERα_ChIPseq_728	chr1	224447626	224447952	-2946	NR_031574	100313769	MIR320B2	microRNA 320b-2
ERα_ChIPseq_729	chr1	224920002	224920429	116036	NM_152495	149111	CNIH3	cornichon family AMPA receptor auxiliary protein 3
ERα_ChIPseq_730	chr1	224920816	224921285	116871	NM_152495	149111	CNIH3	cornichon family AMPA receptor auxiliary protein 3
ERα_ChIPseq_731	chr1	225990557	225991090	-6953	NM_001136018	2052	EPHX1	epoxide hydrolase 1, microsomal (xenobiotic)	+
ERα_ChIPseq_732	chr1	226059528	226059846	10733	NM_014698	9725	TMEM63A	transmembrane protein 63A
ERα_ChIPseq_733	chr1	226063065	226063646	7065	NM_014698	9725	TMEM63A	transmembrane protein 63A
ERα_ChIPseq_734	chr1	226085888	226086243	-9219	NM_020997	10637	LEFTY1	left-right determination factor 1
ERα_ChIPseq_735	chr1	226186879	226187385	-66	NM_152608	163859	SDE2	SDE2 telomere maintenance homolog (S. pombe)		+
ERα_ChIPseq_736	chr1	226635953	226636468	-40409	NM_001618	142	PARP1	poly(ADP-ribose) polymerase 1	+
ERα_ChIPseq_737	chr1	227923400	227923842	-509	NM_001161465	65094	JMJD4	jumonji domain containing 4
ERα_ChIPseq_738	chr1	228230091	228230567	35606	NM_033131	89780	WNT3A	wingless-type MMTV integration site family, member 3A
ERα_ChIPseq_739	chr1	228608777	228609136	4070	NM_003493	8290	HIST3H3	histone cluster 3, H3
ERα_ChIPseq_740	chr1	228871861	228872246	1229	NM_021205	58480	RHOU	ras homolog family member U
ERα_ChIPseq_741	chr1	228989474	228989962	118894	NM_021205	58480	RHOU	ras homolog family member U	+
ERα_ChIPseq_742	chr1	229283812	229284402	26441	NR_039659	100616234	MIR4454	microRNA 4454
ERα_ChIPseq_743	chr1	229297961	229298460	12338	NR_039659	100616234	MIR4454	microRNA 4454	+
ERα_ChIPseq_744	chr1	229300972	229301675	9225	NR_039659	100616234	MIR4454	microRNA 4454	+
ERα_ChIPseq_745	chr1	229355839	229356550	-45646	NR_039659	100616234	MIR4454	microRNA 4454
ERα_ChIPseq_746	chr1	229356999	229357587	-46745	NR_039659	100616234	MIR4454	microRNA 4454	+
ERα_ChIPseq_747	chr1	230219936	230220270	17161	NM_004481	2590	GALNT2	polypeptide N-acetylgalactosaminyltransferase 2		+
ERα_ChIPseq_748	chr1	230636176	230636605	-74716	NM_001258311	79605	PGBD5	piggyBac transposable element derived 5	+
ERα_ChIPseq_749	chr1	230724044	230724665	-53848	NM_007357	22796	COG2	component of oligomeric golgi complex 2
ERα_ChIPseq_750	chr1	230896020	230896522	13110	NM_016452	10753	CAPN9	calpain 9
ERα_ChIPseq_751	chr1	231868550	231868948	85514	NR_002227	27184	DISC2	disrupted in schizophrenia 2 (non-protein coding)
ERα_ChIPseq_752	chr1	232328672	232329072	267292	NR_126441	104472714	DISC1-IT1	DISC1 intronic transcript 1		+
ERα_ChIPseq_753	chr1	232736171	232736656	-85059	NM_020808	57568	SIPA1L2	signal-induced proliferation-associated 1 like 2
ERα_ChIPseq_754	chr1	233217379	233217721	131180	NM_032324	84284	NTPCR	nucleoside-triphosphatase, cancer-related
ERα_ChIPseq_755	chr1	233751025	233751448	1486	NM_002245	3775	KCNK1	potassium channel, two pore domain subfamily K, member 1	+
ERα_ChIPseq_756	chr1	233850720	233851100	91012	NR_039625	100616390	MIR4427	microRNA 4427
ERα_ChIPseq_757	chr1	234108203	234108938	68112	NM_173508	148641	SLC35F3	solute carrier family 35, member F3
ERα_ChIPseq_758	chr1	234688705	234689261	-21458	NR_038426	100506795	LINC01354	long intergenic non-protein coding RNA 1354	+
ERα_ChIPseq_759	chr1	234774643	234775138	-7145	NR_125944	101927787	LOC101927787	uncharacterized LOC101927787	+
ERα_ChIPseq_760	chr1	234803895	234804279	22052	NR_125944	101927787	LOC101927787	uncharacterized LOC101927787	+
ERα_ChIPseq_761	chr1	235003002	235003386	96552	NR_125945	101927851	LOC101927851	uncharacterized LOC101927851
ERα_ChIPseq_762	chr1	235009936	235010762	89397	NR_125945	101927851	LOC101927851	uncharacterized LOC101927851
ERα_ChIPseq_763	chr1	235011256	235011708	88264	NR_125945	101927851	LOC101927851	uncharacterized LOC101927851		+
ERα_ChIPseq_764	chr1	235011815	235012668	87505	NR_125945	101927851	LOC101927851	uncharacterized LOC101927851
ERα_ChIPseq_765	chr1	235096294	235096931	3134	NR_125945	101927851	LOC101927851	uncharacterized LOC101927851
ERα_ChIPseq_766	chr1	235098755	235099661	538	NR_125945	101927851	LOC101927851	uncharacterized LOC101927851	+	+
ERα_ChIPseq_767	chr1	235099716	235100123	-173	NR_125945	101927851	LOC101927851	uncharacterized LOC101927851
ERα_ChIPseq_768	chr1	235109458	235109967	-9966	NR_125945	101927851	LOC101927851	uncharacterized LOC101927851
ERα_ChIPseq_769	chr1	235110774	235111154	-11218	NR_125945	101927851	LOC101927851	uncharacterized LOC101927851
ERα_ChIPseq_770	chr1	235324469	235324815	-71	NR_027762	23029	RBM34	RNA binding motif protein 34		+
ERα_ChIPseq_771	chr1	235459353	235459834	31209	NM_001206794	51742	ARID4B	AT rich interactive domain 4B (RBP1-like)
ERα_ChIPseq_772	chr1	236260317	236260809	-32082	NM_002508	4811	NID1	nidogen 1
ERα_ChIPseq_773	chr1	241428496	241429162	91701	NM_002924	6000	RGS7	regulator of G-protein signaling 7	+
ERα_ChIPseq_774	chr1	241870194	241870675	54854	NM_144625	128025	WDR64	WD repeat domain 64
ERα_ChIPseq_775	chr1	241871904	241872503	56623	NM_144625	128025	WDR64	WD repeat domain 64
ERα_ChIPseq_776	chr1	241964487	241964890	-46805	NM_130398	9156	EXO1	exonuclease 1
ERα_ChIPseq_777	chr1	241980428	241980898	-30830	NM_130398	9156	EXO1	exonuclease 1
ERα_ChIPseq_778	chr1	243643399	243644366	134404	NR_039824	100616343	MIR4677	microRNA 4677
ERα_ChIPseq_779	chr1	244466226	244466602	-49523	NM_001276349	200159	C1orf100	chromosome 1 open reading frame 100	+
ERα_ChIPseq_780	chr1	245966370	245966639	614210	NM_022743	64754	SMYD3	SET and MYND domain containing 3
ERα_ChIPseq_781	chr1	246382529	246383136	197882	NM_022743	64754	SMYD3	SET and MYND domain containing 3	+
ERα_ChIPseq_4969	chr1_gl000191_random	70864	71381	-20841	NM_054016	10772	SRSF10	serine/arginine-rich splicing factor 10	+
ERα_ChIPseq_4970	chr1_gl000191_random	81266	81802	-31253	NM_054016	10772	SRSF10	serine/arginine-rich splicing factor 10
ERα_ChIPseq_4971	chr1_gl000191_random	88373	88894	-38352	NM_054016	10772	SRSF10	serine/arginine-rich splicing factor 10
ERα_ChIPseq_4972	chr1_gl000192_random	111282	112393	295673	NR_103556	100288805	HYDIN2	HYDIN2, axonemal central pair apparatus protein (pseudogene)
ERα_ChIPseq_4973	chr1_gl000192_random	399283	399721	8008	NR_103556	100288805	HYDIN2	HYDIN2, axonemal central pair apparatus protein (pseudogene)
ERα_ChIPseq_782	chr10	110127	110643	-15207	NM_177987	347688	TUBB8	tubulin, beta 8 class VIII
ERα_ChIPseq_783	chr10	134174	134680	-39249	NM_177987	347688	TUBB8	tubulin, beta 8 class VIII
ERα_ChIPseq_784	chr10	135967	136453	-41032	NM_177987	347688	TUBB8	tubulin, beta 8 class VIII		+
ERα_ChIPseq_785	chr10	138352	138908	-41775	NM_006624	10771	ZMYND11	zinc finger, MYND-type containing 11
ERα_ChIPseq_786	chr10	152817	153280	-27357	NM_006624	10771	ZMYND11	zinc finger, MYND-type containing 11	+
ERα_ChIPseq_787	chr10	158317	158917	-21788	NM_006624	10771	ZMYND11	zinc finger, MYND-type containing 11	+
ERα_ChIPseq_788	chr10	172245	173432	-7567	NM_006624	10771	ZMYND11	zinc finger, MYND-type containing 11	+	+
ERα_ChIPseq_789	chr10	183482	183814	2224	NM_001202464	10771	ZMYND11	zinc finger, MYND-type containing 11
ERα_ChIPseq_790	chr10	310772	311255	17013	NR_106988	102465753	MIR7641-2	microRNA 7641-2
ERα_ChIPseq_791	chr10	384753	385256	-56978	NR_106988	102465753	MIR7641-2	microRNA 7641-2	+
ERα_ChIPseq_792	chr10	392295	392761	-64502	NR_106988	102465753	MIR7641-2	microRNA 7641-2
ERα_ChIPseq_793	chr10	419276	419789	-91506	NR_106988	102465753	MIR7641-2	microRNA 7641-2
ERα_ChIPseq_794	chr10	450324	450797	-122534	NR_106988	102465753	MIR7641-2	microRNA 7641-2
ERα_ChIPseq_795	chr10	482047	482498	-154246	NR_106988	102465753	MIR7641-2	microRNA 7641-2	+
ERα_ChIPseq_796	chr10	563156	563612	124334	NR_049884	100847086	MIR5699	microRNA 5699	+
ERα_ChIPseq_797	chr10	633912	634409	53558	NR_049884	100847086	MIR5699	microRNA 5699
ERα_ChIPseq_798	chr10	725380	725779	10029	NM_014974	22982	DIP2C	disco-interacting protein 2 homolog C
ERα_ChIPseq_799	chr10	789956	790628	-54684	NM_014974	22982	DIP2C	disco-interacting protein 2 homolog C
ERα_ChIPseq_800	chr10	824697	825318	-89399	NM_014974	22982	DIP2C	disco-interacting protein 2 homolog C	+
ERα_ChIPseq_801	chr10	862003	862427	115430	NM_015155	23185	LARP4B	La ribonucleoprotein domain family, member 4B
ERα_ChIPseq_802	chr10	977994	978670	-634	NR_120629	101927762	LOC101927762	uncharacterized LOC101927762
ERα_ChIPseq_803	chr10	1016224	1017079	-17698	NM_012341	23560	GTPBP4	GTP binding protein 4	+
ERα_ChIPseq_804	chr10	1140656	1141343	38223	NM_014023	22884	WDR37	WD repeat domain 37
ERα_ChIPseq_805	chr10	1255064	1255665	49656	NR_015376	399706	LINC00200	long intergenic non-protein coding RNA 200	+
ERα_ChIPseq_806	chr10	1295768	1296148	90250	NR_015376	399706	LINC00200	long intergenic non-protein coding RNA 200
ERα_ChIPseq_807	chr10	1311076	1311498	105579	NR_015376	399706	LINC00200	long intergenic non-protein coding RNA 200	+
ERα_ChIPseq_808	chr10	1371353	1371921	165929	NR_015376	399706	LINC00200	long intergenic non-protein coding RNA 200
ERα_ChIPseq_809	chr10	1456888	1457694	-111534	NR_033387	642394	ADARB2-AS1	ADARB2 antisense RNA 1
ERα_ChIPseq_810	chr10	1486083	1487432	-82068	NR_033387	642394	ADARB2-AS1	ADARB2 antisense RNA 1
ERα_ChIPseq_811	chr10	1487486	1487876	-81144	NR_033387	642394	ADARB2-AS1	ADARB2 antisense RNA 1
ERα_ChIPseq_812	chr10	1502074	1503135	-66221	NR_033387	642394	ADARB2-AS1	ADARB2 antisense RNA 1
ERα_ChIPseq_813	chr10	1702899	1703379	76531	NM_018702	105	ADARB2	adenosine deaminase, RNA-specific, B2 (inactive)	+
ERα_ChIPseq_814	chr10	1716909	1717824	62304	NM_018702	105	ADARB2	adenosine deaminase, RNA-specific, B2 (inactive)		+
ERα_ChIPseq_815	chr10	2434441	2435033	-77469	NR_038884	399708	LINC00701	long intergenic non-protein coding RNA 701
ERα_ChIPseq_816	chr10	2442171	2442608	-85121	NR_038884	399708	LINC00701	long intergenic non-protein coding RNA 701	+
ERα_ChIPseq_817	chr10	2442623	2443001	-85544	NR_038884	399708	LINC00701	long intergenic non-protein coding RNA 701	+	+
ERα_ChIPseq_818	chr10	2490243	2490624	-133165	NR_038884	399708	LINC00701	long intergenic non-protein coding RNA 701	+
ERα_ChIPseq_819	chr10	2563999	2564510	-206986	NR_038884	399708	LINC00701	long intergenic non-protein coding RNA 701
ERα_ChIPseq_820	chr10	2564574	2565871	-207954	NR_038884	399708	LINC00701	long intergenic non-protein coding RNA 701
ERα_ChIPseq_821	chr10	3137486	3137828	26838	NM_001242339	5214	PFKP	phosphofructokinase, platelet
ERα_ChIPseq_822	chr10	3260913	3261710	-46278	NM_001242307	10531	PITRM1	pitrilysin metallopeptidase 1
ERα_ChIPseq_823	chr10	3296008	3296958	-64404	NR_131187	105376360	LOC105376360	uncharacterized LOC105376360
ERα_ChIPseq_824	chr10	3331990	3332488	-28648	NR_131187	105376360	LOC105376360	uncharacterized LOC105376360	+	+
ERα_ChIPseq_825	chr10	3473092	3473606	112462	NR_131187	105376360	LOC105376360	uncharacterized LOC105376360
ERα_ChIPseq_826	chr10	3510324	3511127	149838	NR_131187	105376360	LOC105376360	uncharacterized LOC105376360	+
ERα_ChIPseq_827	chr10	3627045	3627639	200131	NM_001300	1316	KLF6	Kruppel-like factor 6
ERα_ChIPseq_828	chr10	3734577	3735032	92669	NM_001300	1316	KLF6	Kruppel-like factor 6	+
ERα_ChIPseq_829	chr10	3986143	3986637	-46962	NR_106726	102464829	MIR6078	microRNA 6078
ERα_ChIPseq_830	chr10	4170164	4170549	76438	NR_120632	101927964	LOC101927964	uncharacterized LOC101927964	+
ERα_ChIPseq_831	chr10	4321884	4322265	-35970	NR_108040	100652988	LINC00702	long intergenic non-protein coding RNA 702	+
ERα_ChIPseq_832	chr10	4797534	4797990	-70607	NM_001271021	83592	AKR1E2	aldo-keto reductase family 1, member E2	+	+
ERα_ChIPseq_833	chr10	4895856	4896241	27679	NM_001040177	83592	AKR1E2	aldo-keto reductase family 1, member E2	+
ERα_ChIPseq_834	chr10	5042540	5043081	3396	NM_001135241	1646	AKR1C2	aldo-keto reductase family 1, member C2
ERα_ChIPseq_835	chr10	5157887	5158734	21742	NM_003739	8644	AKR1C3	aldo-keto reductase family 1, member C3
ERα_ChIPseq_836	chr10	5160277	5160786	23963	NM_003739	8644	AKR1C3	aldo-keto reductase family 1, member C3		+
ERα_ChIPseq_837	chr10	5165747	5166298	29454	NM_003739	8644	AKR1C3	aldo-keto reductase family 1, member C3	+
ERα_ChIPseq_838	chr10	5190375	5190874	36526	NR_027916	340811	AKR1C8P	aldo-keto reductase family 1, member C8, pseudogene
ERα_ChIPseq_839	chr10	5505488	5505858	17159	NR_073040	10276	NET1	neuroepithelial cell transforming 1
ERα_ChIPseq_840	chr10	5529993	5530760	11157	NM_017422	51806	CALML5	calmodulin-like 5		+
ERα_ChIPseq_841	chr10	5535544	5536425	5549	NM_017422	51806	CALML5	calmodulin-like 5	+	+
ERα_ChIPseq_842	chr10	5538255	5539002	2905	NM_017422	51806	CALML5	calmodulin-like 5
ERα_ChIPseq_843	chr10	5545344	5545968	-4123	NM_017422	51806	CALML5	calmodulin-like 5
ERα_ChIPseq_844	chr10	5586799	5587482	-18931	NR_120497	100132159	CALML3-AS1	CALML3 antisense RNA 1	+
ERα_ChIPseq_845	chr10	5587953	5588441	-19988	NR_120497	100132159	CALML3-AS1	CALML3 antisense RNA 1
ERα_ChIPseq_846	chr10	5588810	5589265	-20828	NR_120497	100132159	CALML3-AS1	CALML3 antisense RNA 1
ERα_ChIPseq_847	chr10	5590140	5590716	-22219	NR_120497	100132159	CALML3-AS1	CALML3 antisense RNA 1
ERα_ChIPseq_848	chr10	5593335	5594202	-25559	NR_120497	100132159	CALML3-AS1	CALML3 antisense RNA 1		+
ERα_ChIPseq_849	chr10	5610715	5611483	-42890	NR_120497	100132159	CALML3-AS1	CALML3 antisense RNA 1		+
ERα_ChIPseq_850	chr10	5621525	5622104	-53605	NR_120497	100132159	CALML3-AS1	CALML3 antisense RNA 1
ERα_ChIPseq_851	chr10	5664708	5665572	43418	NR_037164	79754	ASB13	ankyrin repeat and SOCS box containing 13
ERα_ChIPseq_852	chr10	5698402	5698992	9861	NR_037164	79754	ASB13	ankyrin repeat and SOCS box containing 13	+
ERα_ChIPseq_853	chr10	5701733	5702798	6293	NR_037164	79754	ASB13	ankyrin repeat and SOCS box containing 13	+	+
ERα_ChIPseq_854	chr10	5727130	5727604	566	NM_017782	54906	FAM208B	family with sequence similarity 208, member B	+
ERα_ChIPseq_855	chr10	5874522	5875293	-19395	NM_001494	2665	GDI2	GDP dissociation inhibitor 2
ERα_ChIPseq_856	chr10	5958339	5958854	22247	NM_032807	84893	FBXO18	F-box protein, helicase, 18
ERα_ChIPseq_857	chr10	6060629	6061588	-40958	NM_001243539	3601	IL15RA	interleukin 15 receptor, alpha
ERα_ChIPseq_858	chr10	6195183	6195656	-1194	NR_039698	100628560	MIR3155B	microRNA 3155b	+
ERα_ChIPseq_859	chr10	6196687	6197111	-2674	NR_039698	100628560	MIR3155B	microRNA 3155b	+	+
ERα_ChIPseq_860	chr10	6242688	6243090	-1951	NM_004566	5209	PFKFB3	6-phosphofructo-2-kinase/fructose-2,6-biphosphatase 3
ERα_ChIPseq_861	chr10	6300989	6301843	56576	NM_001314063	5209	PFKFB3	6-phosphofructo-2-kinase/fructose-2,6-biphosphatase 3		+
ERα_ChIPseq_862	chr10	6321428	6321864	-46861	NR_040079	399715	LOC399715	uncharacterized LOC399715
ERα_ChIPseq_863	chr10	6338496	6340523	-28998	NR_040079	399715	LOC399715	uncharacterized LOC399715	+	+
ERα_ChIPseq_864	chr10	6343317	6343823	-24937	NR_040079	399715	LOC399715	uncharacterized LOC399715
ERα_ChIPseq_865	chr10	6346082	6346480	-22226	NR_040079	399715	LOC399715	uncharacterized LOC399715		+
ERα_ChIPseq_866	chr10	6387341	6387956	19141	NR_040079	399715	LOC399715	uncharacterized LOC399715
ERα_ChIPseq_867	chr10	6405445	6405959	37195	NR_040079	399715	LOC399715	uncharacterized LOC399715	+
ERα_ChIPseq_868	chr10	6443349	6443813	75074	NR_040079	399715	LOC399715	uncharacterized LOC399715
ERα_ChIPseq_869	chr10	6502691	6503487	119174	NM_001282644	5588	PRKCQ	protein kinase C, theta
ERα_ChIPseq_870	chr10	7420022	7420601	30992	NM_001018039	57713	SFMBT2	Scm-like with four mbt domains 2
ERα_ChIPseq_871	chr10	7742303	7742938	-2616	NM_002216	3698	ITIH2	inter-alpha-trypsin inhibitor heavy chain 2
ERα_ChIPseq_872	chr10	7910003	7910638	49853	NM_031923	83860	TAF3	TATA box binding protein associated factor 3
ERα_ChIPseq_873	chr10	8088797	8089319	5396	NR_104329	399717	GATA3-AS1	GATA3 antisense RNA 1
ERα_ChIPseq_874	chr10	8095497	8096710	-564	NM_002051	2625	GATA3	GATA binding protein 3		+
ERα_ChIPseq_875	chr10	8100363	8100930	3979	NM_001002295	2625	GATA3	GATA binding protein 3	+	+
ERα_ChIPseq_876	chr10	8113705	8114237	17304	NM_001002295	2625	GATA3	GATA binding protein 3		+
ERα_ChIPseq_877	chr10	8126743	8127528	30468	NM_001002295	2625	GATA3	GATA binding protein 3
ERα_ChIPseq_878	chr10	8145427	8146007	49050	NM_001002295	2625	GATA3	GATA binding protein 3		+
ERα_ChIPseq_879	chr10	8170110	8170874	73825	NM_001002295	2625	GATA3	GATA binding protein 3	+	+
ERα_ChIPseq_880	chr10	8449295	8449801	-139280	NR_108058	100507143	LINC00708	long intergenic non-protein coding RNA 708
ERα_ChIPseq_881	chr10	8623849	8624399	-313856	NR_108058	100507143	LINC00708	long intergenic non-protein coding RNA 708
ERα_ChIPseq_882	chr10	8712266	8712782	-227428	NR_131944	105755953	LOC105755953	uncharacterized LOC105755953
ERα_ChIPseq_883	chr10	8713328	8713864	-226356	NR_131944	105755953	LOC105755953	uncharacterized LOC105755953
ERα_ChIPseq_884	chr10	8767772	8768557	-171788	NR_131944	105755953	LOC105755953	uncharacterized LOC105755953
ERα_ChIPseq_885	chr10	8794353	8794813	-145369	NR_131944	105755953	LOC105755953	uncharacterized LOC105755953	+
ERα_ChIPseq_886	chr10	8898784	8899244	-40938	NR_131944	105755953	LOC105755953	uncharacterized LOC105755953
ERα_ChIPseq_887	chr10	8911339	8911816	-28375	NR_131944	105755953	LOC105755953	uncharacterized LOC105755953
ERα_ChIPseq_888	chr10	8915776	8916317	-23906	NR_131944	105755953	LOC105755953	uncharacterized LOC105755953	+
ERα_ChIPseq_889	chr10	9080058	9080824	140489	NR_131944	105755953	LOC105755953	uncharacterized LOC105755953	+	+
ERα_ChIPseq_890	chr10	9111018	9111536	171325	NR_131944	105755953	LOC105755953	uncharacterized LOC105755953	+
ERα_ChIPseq_891	chr10	9220542	9221302	-96654	NR_108039	100507163	LINC00709	long intergenic non-protein coding RNA 709
ERα_ChIPseq_892	chr10	9228478	9231197	-87739	NR_108039	100507163	LINC00709	long intergenic non-protein coding RNA 709		+
ERα_ChIPseq_893	chr10	11325241	11327186	60460	NR_126062	414196	CELF2-AS1	CELF2 antisense RNA 1
ERα_ChIPseq_894	chr10	11407218	11407711	-20791	NR_126062	414196	CELF2-AS1	CELF2 antisense RNA 1
ERα_ChIPseq_895	chr10	11873490	11873998	8347	NM_153256	254427	PROSER2	proline and serine rich 2		+
ERα_ChIPseq_896	chr10	11917989	11918440	18495	NR_038222	219731	PROSER2-AS1	PROSER2 antisense RNA 1	+
ERα_ChIPseq_897	chr10	12192113	12192670	-19576	NR_039699	100616488	MIR548AK	microRNA 548ak	+
ERα_ChIPseq_898	chr10	12542231	12542717	-78278	NR_039700	100616151	MIR4480	microRNA 4480	+
ERα_ChIPseq_899	chr10	12647730	12648234	27230	NR_039700	100616151	MIR4480	microRNA 4480
ERα_ChIPseq_900	chr10	12914474	12914973	128981	NM_031455	83643	CCDC3	coiled-coil domain containing 3	+
ERα_ChIPseq_901	chr10	13082199	13082666	-38728	NM_031455	83643	CCDC3	coiled-coil domain containing 3	+
ERα_ChIPseq_902	chr10	13973848	13974178	-142270	NR_120638	101928453	LOC101928453	uncharacterized LOC101928453
ERα_ChIPseq_903	chr10	14176235	14176811	60240	NR_120638	101928453	LOC101928453	uncharacterized LOC101928453
ERα_ChIPseq_904	chr10	14442024	14442355	-16913	NR_036181	100422843	MIR4293	microRNA 4293
ERα_ChIPseq_905	chr10	14449487	14450058	-24496	NR_036181	100422843	MIR4293	microRNA 4293	+
ERα_ChIPseq_906	chr10	17429765	17430235	1065	NR_034129	100128098	ST8SIA6-AS1	ST8SIA6 antisense RNA 1
ERα_ChIPseq_907	chr10	17487483	17488231	8397	NM_001004470	338596	ST8SIA6	ST8 alpha-N-acetyl-neuraminide alpha-2,8-sialyltransferase 6	+
ERα_ChIPseq_908	chr10	17848159	17848365	-3080	NM_002438	4360	MRC1	mannose receptor, C type 1
ERα_ChIPseq_909	chr10	18948006	18948311	-155	NM_178815	221079	ARL5B	ADP-ribosylation factor like GTPase 5B
ERα_ChIPseq_910	chr10	19510366	19510798	172882	NM_001142308	340895	MALRD1	MAM and LDL receptor class A domain containing 1	+
ERα_ChIPseq_911	chr10	19517286	19517597	179741	NM_001142308	340895	MALRD1	MAM and LDL receptor class A domain containing 1
ERα_ChIPseq_912	chr10	19521099	19521859	183779	NM_001142308	340895	MALRD1	MAM and LDL receptor class A domain containing 1	+	+
ERα_ChIPseq_913	chr10	19683997	19684488	333237	NR_120646	101928834	LOC101928834	uncharacterized LOC101928834	+	+
ERα_ChIPseq_914	chr10	19789932	19790378	227324	NR_120646	101928834	LOC101928834	uncharacterized LOC101928834		+
ERα_ChIPseq_915	chr10	21187512	21187908	-1179	NM_006393	10529	NEBL	nebulette		+
ERα_ChIPseq_916	chr10	21623970	21624399	160953	NR_046284	100128511	NEBL-AS1	NEBL antisense RNA 1
ERα_ChIPseq_917	chr10	21919328	21919792	95986	NM_001195626	8028	MLLT10	myeloid/lymphoid or mixed-lineage leukemia; translocated to, 10	+
ERα_ChIPseq_918	chr10	22103729	22104134	188719	NM_022365	64215	DNAJC1	DnaJ (Hsp40) homolog, subfamily C, member 1		+
ERα_ChIPseq_919	chr10	22159671	22160180	132725	NM_022365	64215	DNAJC1	DnaJ (Hsp40) homolog, subfamily C, member 1
ERα_ChIPseq_920	chr10	22291604	22292312	692	NM_022365	64215	DNAJC1	DnaJ (Hsp40) homolog, subfamily C, member 1
ERα_ChIPseq_921	chr10	22407019	22407446	91680	NM_001199938	340900	EBLN1	endogenous Bornavirus-like nucleoprotein 1
ERα_ChIPseq_922	chr10	22476144	22476659	22511	NM_001199938	340900	EBLN1	endogenous Bornavirus-like nucleoprotein 1
ERα_ChIPseq_923	chr10	22872490	22873261	130628	NM_005028	5305	PIP4K2A	phosphatidylinositol-5-phosphate 4-kinase, type II, alpha	+	+
ERα_ChIPseq_924	chr10	22887348	22887902	115878	NM_005028	5305	PIP4K2A	phosphatidylinositol-5-phosphate 4-kinase, type II, alpha	+
ERα_ChIPseq_925	chr10	22921835	22922752	81210	NM_005028	5305	PIP4K2A	phosphatidylinositol-5-phosphate 4-kinase, type II, alpha	+
ERα_ChIPseq_926	chr10	22923615	22924063	79664	NM_005028	5305	PIP4K2A	phosphatidylinositol-5-phosphate 4-kinase, type II, alpha
ERα_ChIPseq_927	chr10	22969437	22970013	33778	NM_005028	5305	PIP4K2A	phosphatidylinositol-5-phosphate 4-kinase, type II, alpha	+	+
ERα_ChIPseq_928	chr10	22970622	22971074	32655	NM_005028	5305	PIP4K2A	phosphatidylinositol-5-phosphate 4-kinase, type II, alpha
ERα_ChIPseq_929	chr10	22972078	22973040	30944	NM_005028	5305	PIP4K2A	phosphatidylinositol-5-phosphate 4-kinase, type II, alpha		+
ERα_ChIPseq_930	chr10	23015710	23016289	-12496	NM_005028	5305	PIP4K2A	phosphatidylinositol-5-phosphate 4-kinase, type II, alpha
ERα_ChIPseq_931	chr10	23133325	23133936	-83323	NM_001282746	219681	ARMC3	armadillo repeat containing 3	+
ERα_ChIPseq_932	chr10	23136972	23137338	-79798	NM_001282746	219681	ARMC3	armadillo repeat containing 3
ERα_ChIPseq_933	chr10	23344970	23345376	-39254	NM_012228	22921	MSRB2	methionine sulfoxide reductase B2	+
ERα_ChIPseq_934	chr10	23370263	23370784	-13904	NM_012228	22921	MSRB2	methionine sulfoxide reductase B2		+
ERα_ChIPseq_935	chr10	24496588	24497132	-860	NM_001282767	56243	KIAA1217	KIAA1217		+
ERα_ChIPseq_936	chr10	25346563	25347013	4420	NM_001270383	219670	ENKUR	enkurin, TRPC channel interacting protein
ERα_ChIPseq_937	chr10	25673468	25674044	-208551	NR_027333	100128811	GPR158-AS1	GPR158 antisense RNA 1		+
ERα_ChIPseq_938	chr10	27271058	27271456	-40327	NR_026795	387644	LINC00202-1	long intergenic non-protein coding RNA 202-1	+
ERα_ChIPseq_939	chr10	27824525	27824849	31584	NM_001256412	22931	RAB18	RAB18, member RAS oncogene family
ERα_ChIPseq_940	chr10	28535245	28535764	35563	NM_173496	143098	MPP7	membrane protein, palmitoylated 7
ERα_ChIPseq_941	chr10	28545791	28546237	25053	NM_173496	143098	MPP7	membrane protein, palmitoylated 7	+	+
ERα_ChIPseq_942	chr10	28673523	28673986	-95475	NR_107053	102465880	MIR8086	microRNA 8086
ERα_ChIPseq_943	chr10	28784788	28786009	35885	NR_033805	220906	WAC-AS1	WAC antisense RNA 1 (head to head)	+	+
ERα_ChIPseq_944	chr10	28789083	28789555	31964	NR_033805	220906	WAC-AS1	WAC antisense RNA 1 (head to head)
ERα_ChIPseq_945	chr10	29189299	29189739	54182	NM_001278522	283080	C10orf126	chromosome 10 open reading frame 126
ERα_ChIPseq_946	chr10	29214111	29214991	79214	NM_001278522	283080	C10orf126	chromosome 10 open reading frame 126	+
ERα_ChIPseq_947	chr10	29228730	29229098	93577	NM_001278522	283080	C10orf126	chromosome 10 open reading frame 126
ERα_ChIPseq_948	chr10	29311348	29311841	176257	NM_001278522	283080	C10orf126	chromosome 10 open reading frame 126
ERα_ChIPseq_949	chr10	29321171	29321715	186106	NM_001278522	283080	C10orf126	chromosome 10 open reading frame 126
ERα_ChIPseq_950	chr10	29337342	29337879	202273	NM_001278522	283080	C10orf126	chromosome 10 open reading frame 126		+
ERα_ChIPseq_951	chr10	29338369	29339100	203397	NM_001278522	283080	C10orf126	chromosome 10 open reading frame 126		+
ERα_ChIPseq_952	chr10	29353245	29353805	218188	NM_001278522	283080	C10orf126	chromosome 10 open reading frame 126
ERα_ChIPseq_953	chr10	29364069	29364431	-213740	NM_032517	84569	LYZL1	lysozyme-like 1
ERα_ChIPseq_954	chr10	29393929	29394262	-183895	NM_032517	84569	LYZL1	lysozyme-like 1		+
ERα_ChIPseq_955	chr10	29396857	29397304	-180910	NM_032517	84569	LYZL1	lysozyme-like 1	+
ERα_ChIPseq_956	chr10	29397840	29398224	-179958	NM_032517	84569	LYZL1	lysozyme-like 1
ERα_ChIPseq_957	chr10	29399400	29399856	-178362	NM_032517	84569	LYZL1	lysozyme-like 1	+
ERα_ChIPseq_958	chr10	29413699	29414509	-163886	NM_032517	84569	LYZL1	lysozyme-like 1		+
ERα_ChIPseq_959	chr10	29430656	29431025	-147150	NM_032517	84569	LYZL1	lysozyme-like 1
ERα_ChIPseq_960	chr10	29438782	29439355	-138922	NM_032517	84569	LYZL1	lysozyme-like 1
ERα_ChIPseq_961	chr10	29452733	29453229	-125009	NM_032517	84569	LYZL1	lysozyme-like 1
ERα_ChIPseq_962	chr10	29580720	29580937	2838	NM_032517	84569	LYZL1	lysozyme-like 1	+
ERα_ChIPseq_963	chr10	29592181	29593020	14610	NM_032517	84569	LYZL1	lysozyme-like 1	+
ERα_ChIPseq_964	chr10	29607208	29607804	29516	NM_032517	84569	LYZL1	lysozyme-like 1
ERα_ChIPseq_965	chr10	29753471	29753944	54535	NR_110928	102724316	SVIL-AS1	SVIL antisense RNA 1
ERα_ChIPseq_966	chr10	29919100	29919715	4494	NM_021738	6840	SVIL	supervillin
ERα_ChIPseq_967	chr10	29957404	29957996	-33799	NM_021738	6840	SVIL	supervillin
ERα_ChIPseq_968	chr10	30101073	30101774	-76693	NM_003174	6840	SVIL	supervillin	+
ERα_ChIPseq_969	chr10	30151807	30152434	-127390	NM_003174	6840	SVIL	supervillin
ERα_ChIPseq_970	chr10	30159286	30159868	-134847	NM_003174	6840	SVIL	supervillin
ERα_ChIPseq_971	chr10	30179355	30179862	-154878	NM_003174	6840	SVIL	supervillin
ERα_ChIPseq_972	chr10	30653910	30654451	3414	NR_106985	102466227	MIR7162	microRNA 7162		+
ERα_ChIPseq_973	chr10	30722486	30722967	-224	NM_001244134	1326	MAP3K8	mitogen-activated protein kinase kinase kinase 8	+
ERα_ChIPseq_974	chr10	30782998	30783552	60325	NM_005204	1326	MAP3K8	mitogen-activated protein kinase kinase kinase 8
ERα_ChIPseq_975	chr10	30811580	30812132	88906	NM_005204	1326	MAP3K8	mitogen-activated protein kinase kinase kinase 8	+
ERα_ChIPseq_976	chr10	30825540	30825933	92911	NM_183058	119180	LYZL2	lysozyme-like 2
ERα_ChIPseq_977	chr10	30831086	30831634	87287	NM_183058	119180	LYZL2	lysozyme-like 2	+
ERα_ChIPseq_978	chr10	30868139	30868537	50309	NM_183058	119180	LYZL2	lysozyme-like 2
ERα_ChIPseq_979	chr10	30901122	30901580	17296	NM_183058	119180	LYZL2	lysozyme-like 2	+
ERα_ChIPseq_980	chr10	30915641	30916031	2811	NM_183058	119180	LYZL2	lysozyme-like 2	+
ERα_ChIPseq_981	chr10	30971073	30971757	-9788	NR_036438	645954	SVILP1	supervillin pseudogene 1	+
ERα_ChIPseq_982	chr10	30998894	30999332	17910	NR_036438	645954	SVILP1	supervillin pseudogene 1
ERα_ChIPseq_983	chr10	31129276	31129755	148312	NR_036438	645954	SVILP1	supervillin pseudogene 1
ERα_ChIPseq_984	chr10	31148776	31149457	139330	NM_001143769	220929	ZNF438	zinc finger protein 438
ERα_ChIPseq_985	chr10	31871644	31871979	261747	NM_001174094	6935	ZEB1	zinc finger E-box binding homeobox 1
ERα_ChIPseq_986	chr10	32047950	32048450	149654	NM_001270699	94134	ARHGAP12	Rho GTPase activating protein 12	+
ERα_ChIPseq_987	chr10	32394832	32395224	-49657	NM_004521	3799	KIF5B	kinesin family member 5B
ERα_ChIPseq_988	chr10	32427719	32428195	-82586	NM_004521	3799	KIF5B	kinesin family member 5B	+
ERα_ChIPseq_989	chr10	32486113	32487176	-141273	NM_004521	3799	KIF5B	kinesin family member 5B	+
ERα_ChIPseq_990	chr10	32632819	32633128	3003	NM_001272019	80314	EPC1	enhancer of polycomb homolog 1 (Drosophila)	+
ERα_ChIPseq_991	chr10	32649076	32649486	12989	NR_104163	102031319	LOC102031319	uncharacterized LOC102031319		+
ERα_ChIPseq_992	chr10	32940317	32941086	84050	NM_024688	79741	CCDC7	coiled-coil domain containing 7	+	+
ERα_ChIPseq_993	chr10	33273436	33273902	-26376	NM_002211	3688	ITGB1	integrin beta 1
ERα_ChIPseq_994	chr10	33298951	33299444	-51904	NM_002211	3688	ITGB1	integrin beta 1
ERα_ChIPseq_995	chr10	33553064	33553820	70391	NM_003873	8829	NRP1	neuropilin 1
ERα_ChIPseq_996	chr10	33560804	33561291	62786	NM_003873	8829	NRP1	neuropilin 1
ERα_ChIPseq_997	chr10	33624825	33625349	-1254	NM_001244973	8829	NRP1	neuropilin 1		+
ERα_ChIPseq_998	chr10	33638582	33638893	-14904	NM_001244973	8829	NRP1	neuropilin 1
ERα_ChIPseq_999	chr10	33641603	33642097	-18017	NM_001244973	8829	NRP1	neuropilin 1
ERα_ChIPseq_1000	chr10	34090726	34091043	-29276	NR_038932	100505583	LINC00838	long intergenic non-protein coding RNA 838
ERα_ChIPseq_1001	chr10	34339774	34340250	-278404	NR_038932	100505583	LINC00838	long intergenic non-protein coding RNA 838
ERα_ChIPseq_1002	chr10	34716265	34716834	387704	NM_001184791	56288	PARD3	par-3 family cell polarity regulator	+
ERα_ChIPseq_1003	chr10	35005817	35006362	98164	NM_001184791	56288	PARD3	par-3 family cell polarity regulator
ERα_ChIPseq_1004	chr10	35011228	35011752	92763	NM_001184791	56288	PARD3	par-3 family cell polarity regulator	+
ERα_ChIPseq_1005	chr10	35415887	35416327	-278	NM_183060	1390	CREM	cAMP responsive element modulator
ERα_ChIPseq_1006	chr10	35956017	35956586	-25939	NM_031866	8325	FZD8	frizzled class receptor 8
ERα_ChIPseq_1007	chr10	36653138	36653708	586193	NR_110138	102578074	PCAT5	prostate cancer associated transcript 5 (non-protein coding)
ERα_ChIPseq_1008	chr10	37245181	37245626	-169382	NM_052997	91074	ANKRD30A	ankyrin repeat domain 30A
ERα_ChIPseq_1009	chr10	38792030	38792401	75141	NR_024497	399744	LINC00999	long intergenic non-protein coding RNA 999
ERα_ChIPseq_1010	chr10	43361461	43361878	83715	NM_014753	9790	BMS1	BMS1 ribosome biogenesis factor
ERα_ChIPseq_1011	chr10	43521685	43522338	29000	NR_049836	100847014	MIR5100	microRNA 5100
ERα_ChIPseq_1012	chr10	43533395	43533901	-38869	NM_020630	5979	RET	ret proto-oncogene	+
ERα_ChIPseq_1013	chr10	43555911	43556422	-16351	NM_020630	5979	RET	ret proto-oncogene
ERα_ChIPseq_1014	chr10	43563995	43564494	-8273	NM_020630	5979	RET	ret proto-oncogene		+
ERα_ChIPseq_1015	chr10	43577455	43577906	5163	NM_020975	5979	RET	ret proto-oncogene
ERα_ChIPseq_1016	chr10	43581698	43582271	9467	NM_020975	5979	RET	ret proto-oncogene
ERα_ChIPseq_1017	chr10	43605948	43606780	-27529	NM_018590	55454	CSGALNACT2	chondroitin sulfate N-acetylgalactosaminyltransferase 2	+
ERα_ChIPseq_1018	chr10	43850996	43852131	-15529	NM_001184963	53828	FXYD4	FXYD domain containing ion transport regulator 4	+
ERα_ChIPseq_1019	chr10	43858924	43859277	-7992	NM_001184963	53828	FXYD4	FXYD domain containing ion transport regulator 4	+
ERα_ChIPseq_1020	chr10	43870407	43870844	3533	NM_173160	53828	FXYD4	FXYD domain containing ion transport regulator 4	+
ERα_ChIPseq_1021	chr10	43870965	43871572	4176	NM_173160	53828	FXYD4	FXYD domain containing ion transport regulator 4	+
ERα_ChIPseq_1022	chr10	44092197	44092557	-9478	NM_145312	220992	ZNF485	zinc finger protein 485	+
ERα_ChIPseq_1023	chr10	44668324	44669489	-119292	NM_001258000	100130539	C10orf142	chromosome 10 open reading frame 142	+	+
ERα_ChIPseq_1024	chr10	44732153	44732773	-55735	NM_001258000	100130539	C10orf142	chromosome 10 open reading frame 142
ERα_ChIPseq_1025	chr10	44754609	44754939	-33424	NM_001258000	100130539	C10orf142	chromosome 10 open reading frame 142	+
ERα_ChIPseq_1026	chr10	44796477	44797088	8584	NM_001258000	100130539	C10orf142	chromosome 10 open reading frame 142
ERα_ChIPseq_1027	chr10	44988096	44988652	-107829	NM_001033886	6387	CXCL12	chemokine (C-X-C motif) ligand 12	+
ERα_ChIPseq_1028	chr10	45137422	45137835	-257083	NM_001033886	6387	CXCL12	chemokine (C-X-C motif) ligand 12	+
ERα_ChIPseq_1029	chr10	45423572	45424501	17272	NM_001123376	643236	TMEM72	transmembrane protein 72
ERα_ChIPseq_1030	chr10	46410054	46410735	-61069	NM_001291379	119016	AGAP4	ArfGAP with GTPase domain, ankyrin repeat and PH domain 4	+
ERα_ChIPseq_1031	chr10	46990620	46991043	-2715	NM_014696	9721	GPRIN2	G protein regulated inducer of neurite outgrowth 2
ERα_ChIPseq_1032	chr10	46993758	46994246	456	NM_014696	9721	GPRIN2	G protein regulated inducer of neurite outgrowth 2
ERα_ChIPseq_1033	chr10	47987061	47987616	-168605	NR_033407	1517	CTSLP2	cathepsin L pseudogene 2
ERα_ChIPseq_1034	chr10	48326152	48326607	-28710	NM_153034	118738	ZNF488	zinc finger protein 488
ERα_ChIPseq_1035	chr10	48328963	48329414	-25901	NM_153034	118738	ZNF488	zinc finger protein 488	+
ERα_ChIPseq_1036	chr10	48331850	48333271	-22529	NM_153034	118738	ZNF488	zinc finger protein 488	+
ERα_ChIPseq_1037	chr10	49429596	49430106	-46611	NR_033172	728798	FRMPD2B	FERM and PDZ domain containing 2B, pseudogene
ERα_ChIPseq_1038	chr10	49495986	49496375	-13239	NM_001018071	143162	FRMPD2	FERM and PDZ domain containing 2
ERα_ChIPseq_1039	chr10	49726405	49726808	-24914	NM_001256026	58504	ARHGAP22	Rho GTPase activating protein 22
ERα_ChIPseq_1040	chr10	49727165	49727510	-25645	NM_001256026	58504	ARHGAP22	Rho GTPase activating protein 22
ERα_ChIPseq_1041	chr10	49735081	49735615	-33656	NM_001256026	58504	ARHGAP22	Rho GTPase activating protein 22
ERα_ChIPseq_1042	chr10	50021914	50022447	100100	NM_001006939	474354	LRRC18	leucine rich repeat containing 18	+
ERα_ChIPseq_1043	chr10	50022819	50023457	99142	NM_001006939	474354	LRRC18	leucine rich repeat containing 18		+
ERα_ChIPseq_1044	chr10	50806999	50807409	-9937	NM_020984	1103	CHAT	choline O-acetyltransferase
ERα_ChIPseq_1045	chr10	51091794	51092504	-121724	NM_001143996	55753	OGDHL	oxoglutarate dehydrogenase-like
ERα_ChIPseq_1046	chr10	51313575	51314137	57488	NR_029388	728407	PARGP1	poly (ADP-ribose) glycohydrolase pseudogene 1
ERα_ChIPseq_1047	chr10	51547251	51547847	-2004	NM_002443	4477	MSMB	microseminoprotein, beta-
ERα_ChIPseq_1048	chr10	51561890	51562277	-3025	NM_001145263	8031	NCOA4	nuclear receptor coactivator 4	+
ERα_ChIPseq_1049	chr10	51680645	51681170	-57521	NR_073029	100287932	TIMM23	translocase of inner mitochondrial membrane 23 homolog (yeast)
ERα_ChIPseq_1050	chr10	51932444	51932937	75680	NM_019893	56624	ASAH2	N-acylsphingosine amidohydrolase (non-lysosomal ceramidase) 2
ERα_ChIPseq_1051	chr10	52120835	52121209	-112652	NM_001143974	56624	ASAH2	N-acylsphingosine amidohydrolase (non-lysosomal ceramidase) 2	+
ERα_ChIPseq_1052	chr10	52219561	52220076	163919	NM_147156	259230	SGMS1	sphingomyelin synthase 1	+
ERα_ChIPseq_1053	chr10	52233675	52234141	149829	NM_147156	259230	SGMS1	sphingomyelin synthase 1
ERα_ChIPseq_1054	chr10	52528601	52529142	29183	NM_001079516	653308	ASAH2B	N-acylsphingosine amidohydrolase (non-lysosomal ceramidase) 2B
ERα_ChIPseq_1055	chr10	54002823	54003475	70739	NR_038277	100506939	PRKG1-AS1	PRKG1 antisense RNA 1	+
ERα_ChIPseq_1056	chr10	54069742	54070203	3916	NR_038277	100506939	PRKG1-AS1	PRKG1 antisense RNA 1
ERα_ChIPseq_1057	chr10	54073048	54073482	623	NR_038277	100506939	PRKG1-AS1	PRKG1 antisense RNA 1	+
ERα_ChIPseq_1058	chr10	54195176	54195765	19562	NR_120642	101928687	LINC01468	long intergenic non-protein coding RNA 1468	+
ERα_ChIPseq_1059	chr10	58424646	58425384	-303981	NM_032997	11130	ZWINT	ZW10 interacting kinetochore protein	+
ERα_ChIPseq_1060	chr10	58543304	58543752	-422494	NM_032997	11130	ZWINT	ZW10 interacting kinetochore protein	+
ERα_ChIPseq_1061	chr10	58978121	58978380	86069	NR_037490	100500834	MIR3924	microRNA 3924
ERα_ChIPseq_1062	chr10	58981315	58981808	82758	NR_037490	100500834	MIR3924	microRNA 3924
ERα_ChIPseq_1063	chr10	61639036	61639462	27165	NM_005436	8030	CCDC6	coiled-coil domain containing 6	+
ERα_ChIPseq_1064	chr10	61725148	61725678	-4742	NR_024340	283025	LINC01553	long intergenic non-protein coding RNA 1553		+
ERα_ChIPseq_1065	chr10	61982707	61983150	-82154	NM_001149	288	ANK3	ankyrin 3, node of Ranvier (ankyrin G)
ERα_ChIPseq_1066	chr10	62607882	62608835	70146	NM_033379	983	CDK1	cyclin-dependent kinase 1	+	+
ERα_ChIPseq_1067	chr10	62826736	62827214	50942	NR_108052	100507058	LINC00845	long intergenic non-protein coding RNA 845
ERα_ChIPseq_1068	chr10	62827538	62827972	51722	NR_108052	100507058	LINC00845	long intergenic non-protein coding RNA 845
ERα_ChIPseq_1069	chr10	62939434	62939840	163604	NR_108052	100507058	LINC00845	long intergenic non-protein coding RNA 845
ERα_ChIPseq_1070	chr10	63031273	63031763	-180879	NR_120643	101928781	TMEM26-AS1	TMEM26 antisense RNA 1		+
ERα_ChIPseq_1071	chr10	63032473	63032959	-179681	NR_120643	101928781	TMEM26-AS1	TMEM26 antisense RNA 1	+
ERα_ChIPseq_1072	chr10	63109762	63110178	-102427	NR_120643	101928781	TMEM26-AS1	TMEM26 antisense RNA 1
ERα_ChIPseq_1073	chr10	63169442	63170122	-42615	NR_120643	101928781	TMEM26-AS1	TMEM26 antisense RNA 1	+
ERα_ChIPseq_1074	chr10	63429655	63430065	7141	NM_173554	219621	C10orf107	chromosome 10 open reading frame 107
ERα_ChIPseq_1075	chr10	63677750	63678442	17083	NM_032199	84159	ARID5B	AT rich interactive domain 5B (MRF1-like)	+
ERα_ChIPseq_1076	chr10	63691880	63692385	31119	NM_032199	84159	ARID5B	AT rich interactive domain 5B (MRF1-like)
ERα_ChIPseq_1077	chr10	63808568	63809192	-90	NM_001244638	84159	ARID5B	AT rich interactive domain 5B (MRF1-like)
ERα_ChIPseq_1078	chr10	63836562	63836985	27803	NM_001244638	84159	ARID5B	AT rich interactive domain 5B (MRF1-like)	+
ERα_ChIPseq_1079	chr10	63849523	63849928	40755	NM_001244638	84159	ARID5B	AT rich interactive domain 5B (MRF1-like)	+
ERα_ChIPseq_1080	chr10	64141606	64142063	-6948	NR_104162	283045	LOC283045	uncharacterized LOC283045	+
ERα_ChIPseq_1081	chr10	65390190	65391202	109573	NM_001001330	221035	REEP3	receptor accessory protein 3
ERα_ChIPseq_1082	chr10	65470747	65471049	189775	NM_001001330	221035	REEP3	receptor accessory protein 3
ERα_ChIPseq_1083	chr10	65471901	65472296	190975	NM_001001330	221035	REEP3	receptor accessory protein 3
ERα_ChIPseq_1084	chr10	68283300	68283958	-402163	NM_178011	347731	LRRTM3	leucine rich repeat transmembrane neuronal 3
ERα_ChIPseq_1085	chr10	68385867	68386382	-299668	NM_178011	347731	LRRTM3	leucine rich repeat transmembrane neuronal 3
ERα_ChIPseq_1086	chr10	68912966	68913439	141178	NR_111909	347731	LRRTM3	leucine rich repeat transmembrane neuronal 3
ERα_ChIPseq_1087	chr10	69548311	69548757	49403	NM_201262	56521	DNAJC12	DnaJ (Hsp40) homolog, subfamily C, member 12	+	+
ERα_ChIPseq_1088	chr10	69847016	69847442	-12126	NM_001278185	26091	HERC4	HECT and RLD domain containing E3 ubiquitin protein ligase 4
ERα_ChIPseq_1089	chr10	70571321	70571673	-15797	NM_001130159	219736	STOX1	storkhead box 1	+
ERα_ChIPseq_1090	chr10	70973409	70973794	-6458	NM_025130	80201	HKDC1	hexokinase domain containing 1	+	+
ERα_ChIPseq_1091	chr10	71078984	71079515	646	NM_000188	3098	HK1	hexokinase 1	+
ERα_ChIPseq_1092	chr10	71181574	71182152	-5189	NM_001057	6865	TACR2	tachykinin receptor 2
ERα_ChIPseq_1093	chr10	71199011	71199648	-11897	NM_012339	23555	TSPAN15	tetraspanin 15	+
ERα_ChIPseq_1094	chr10	71224506	71225069	13561	NM_012339	23555	TSPAN15	tetraspanin 15	+
ERα_ChIPseq_1095	chr10	71841150	71841603	29019	NM_018649	55506	H2AFY2	H2A histone family, member Y2	+
ERα_ChIPseq_1096	chr10	72626691	72627154	21089	NM_001289797	5092	PCBD1	pterin-4 alpha-carbinolamine dehydratase/dimerization cofactor of hepatocyte nuclear factor 1 alpha	+
ERα_ChIPseq_1097	chr10	72627771	72628301	19975	NM_001289797	5092	PCBD1	pterin-4 alpha-carbinolamine dehydratase/dimerization cofactor of hepatocyte nuclear factor 1 alpha
ERα_ChIPseq_1098	chr10	72633751	72634165	14053	NM_001289797	5092	PCBD1	pterin-4 alpha-carbinolamine dehydratase/dimerization cofactor of hepatocyte nuclear factor 1 alpha
ERα_ChIPseq_1099	chr10	73093785	73094382	15073	NM_018344	55315	SLC29A3	solute carrier family 29 (equilibrative nucleoside transporter), member 3
ERα_ChIPseq_1100	chr10	73096884	73097312	18088	NM_018344	55315	SLC29A3	solute carrier family 29 (equilibrative nucleoside transporter), member 3
ERα_ChIPseq_1101	chr10	73098484	73098786	19625	NM_018344	55315	SLC29A3	solute carrier family 29 (equilibrative nucleoside transporter), member 3
ERα_ChIPseq_1102	chr10	73099468	73100176	20812	NM_018344	55315	SLC29A3	solute carrier family 29 (equilibrative nucleoside transporter), member 3	+
ERα_ChIPseq_1103	chr10	73272552	73273306	-1252	NR_120672	102723377	LOC102723377	uncharacterized LOC102723377
ERα_ChIPseq_1104	chr10	73627873	73628460	-17084	NM_001042466	5660	PSAP	prosaposin
ERα_ChIPseq_1105	chr10	73640418	73640893	-29573	NM_001042466	5660	PSAP	prosaposin
ERα_ChIPseq_1106	chr10	73828531	73829112	19710	NM_001244950	9806	SPOCK2	sparc/osteonectin, cwcv and kazal-like domains proteoglycan (testican) 2	+
ERα_ChIPseq_1107	chr10	73869416	73870045	-20940	NM_001134434	9806	SPOCK2	sparc/osteonectin, cwcv and kazal-like domains proteoglycan (testican) 2	+
ERα_ChIPseq_1108	chr10	74021249	74021645	-12230	NM_019058	54541	DDIT4	DNA damage inducible transcript 4
ERα_ChIPseq_1109	chr10	74032305	74032864	-1093	NM_019058	54541	DDIT4	DNA damage inducible transcript 4
ERα_ChIPseq_1110	chr10	74082884	74083356	31787	NM_001002762	54788	DNAJB12	DnaJ (Hsp40) homolog, subfamily B, member 12	+
ERα_ChIPseq_1111	chr10	74091280	74091812	23361	NM_001002762	54788	DNAJB12	DnaJ (Hsp40) homolog, subfamily B, member 12
ERα_ChIPseq_1112	chr10	75579173	75579643	-7819	NM_003635	8509	NDST2	N-deacetylase/N-sulfotransferase (heparan glucosaminyl) 2
ERα_ChIPseq_1113	chr10	75579678	75580035	-8267	NM_003635	8509	NDST2	N-deacetylase/N-sulfotransferase (heparan glucosaminyl) 2		+
ERα_ChIPseq_1114	chr10	75653260	75653702	-17381	NM_002658	5328	PLAU	plasminogen activator, urokinase
ERα_ChIPseq_1115	chr10	76317472	76317904	-28606	NR_120673	102723439	LOC102723439	uncharacterized LOC102723439	+
ERα_ChIPseq_1116	chr10	76345300	76345789	-56462	NR_120673	102723439	LOC102723439	uncharacterized LOC102723439
ERα_ChIPseq_1117	chr10	76415453	76415903	-126596	NR_120673	102723439	LOC102723439	uncharacterized LOC102723439
ERα_ChIPseq_1118	chr10	76502942	76503530	-82935	NM_001256469	23522	KAT6B	K(lysine) acetyltransferase 6B
ERα_ChIPseq_1119	chr10	76581338	76581941	-4532	NM_001256469	23522	KAT6B	K(lysine) acetyltransferase 6B
ERα_ChIPseq_1120	chr10	76659453	76660620	73865	NM_012330	23522	KAT6B	K(lysine) acetyltransferase 6B
ERα_ChIPseq_1121	chr10	76660989	76661671	75159	NM_012330	23522	KAT6B	K(lysine) acetyltransferase 6B
ERα_ChIPseq_1122	chr10	76924475	76924813	-45268	NM_001184823	7417	VDAC2	voltage-dependent anion channel 2	+
ERα_ChIPseq_1123	chr10	76995378	76995886	138	NM_144589	118881	COMTD1	catechol-O-methyltransferase domain containing 1
ERα_ChIPseq_1124	chr10	77005004	77005553	-9508	NM_144589	118881	COMTD1	catechol-O-methyltransferase domain containing 1
ERα_ChIPseq_1125	chr10	77022347	77022953	-26880	NM_144589	118881	COMTD1	catechol-O-methyltransferase domain containing 1
ERα_ChIPseq_1126	chr10	78733639	78734100	86067	NR_120655	101929328	KCNMA1-AS1	KCNMA1 antisense RNA 1
ERα_ChIPseq_1127	chr10	79169722	79170286	59374	NR_126365	101929286	KCNMA1-AS3	KCNMA1 antisense RNA 3
ERα_ChIPseq_1128	chr10	79629640	79630105	56476	NM_004747	9231	DLG5	discs, large homolog 5 (Drosophila)		+
ERα_ChIPseq_1129	chr10	79631934	79632396	54183	NM_004747	9231	DLG5	discs, large homolog 5 (Drosophila)	+	+
ERα_ChIPseq_1130	chr10	79647259	79647745	38846	NM_004747	9231	DLG5	discs, large homolog 5 (Drosophila)
ERα_ChIPseq_1131	chr10	79649011	79649665	37010	NM_004747	9231	DLG5	discs, large homolog 5 (Drosophila)	+
ERα_ChIPseq_1132	chr10	79731992	79732302	45577	NR_024585	100128292	DLG5-AS1	DLG5 antisense RNA 1	+
ERα_ChIPseq_1133	chr10	79966395	79966757	-41806	NR_038985	100132987	LINC00856	long intergenic non-protein coding RNA 856
ERα_ChIPseq_1134	chr10	80016048	80016324	7804	NR_038985	100132987	LINC00856	long intergenic non-protein coding RNA 856
ERα_ChIPseq_1135	chr10	80061742	80062263	34917	NR_073447	414243	LINC00595	long intergenic non-protein coding RNA 595
ERα_ChIPseq_1136	chr10	80451028	80451336	376023	NR_024429	283050	ZMIZ1-AS1	ZMIZ1 antisense RNA 1	+
ERα_ChIPseq_1137	chr10	80603214	80603557	223820	NR_024429	283050	ZMIZ1-AS1	ZMIZ1 antisense RNA 1	+	+
ERα_ChIPseq_1138	chr10	80671482	80671931	155499	NR_024429	283050	ZMIZ1-AS1	ZMIZ1 antisense RNA 1		+
ERα_ChIPseq_1139	chr10	80737493	80738020	89449	NR_024429	283050	ZMIZ1-AS1	ZMIZ1 antisense RNA 1	+	+
ERα_ChIPseq_1140	chr10	80888203	80888841	59730	NM_020338	57178	ZMIZ1	zinc finger, MIZ-type containing 1	+	+
ERα_ChIPseq_1141	chr10	80918126	80918661	89601	NM_020338	57178	ZMIZ1	zinc finger, MIZ-type containing 1	+
ERα_ChIPseq_1142	chr10	80922425	80922997	93919	NM_020338	57178	ZMIZ1	zinc finger, MIZ-type containing 1
ERα_ChIPseq_1143	chr10	80999167	81000205	-107534	NM_005729	10105	PPIF	peptidylprolyl isomerase F	+
ERα_ChIPseq_1144	chr10	81024797	81025224	-82210	NM_005729	10105	PPIF	peptidylprolyl isomerase F	+
ERα_ChIPseq_1145	chr10	81101913	81102250	-5139	NM_005729	10105	PPIF	peptidylprolyl isomerase F
ERα_ChIPseq_1146	chr10	81102445	81102870	-4563	NM_005729	10105	PPIF	peptidylprolyl isomerase F	+
ERα_ChIPseq_1147	chr10	81118437	81119005	11501	NM_005729	10105	PPIF	peptidylprolyl isomerase F
ERα_ChIPseq_1148	chr10	81268058	81268585	-4036	NM_001099692	143244	EIF5AL1	eukaryotic translation initiation factor 5A-like 1	+
ERα_ChIPseq_1149	chr10	81901947	81902318	9874	NM_001012973	219348	PLAC9	placenta specific 9
ERα_ChIPseq_1150	chr10	81965503	81965980	-308	NM_001278407	311	ANXA11	annexin A11	+
ERα_ChIPseq_1151	chr10	82011265	82011839	37882	NM_000429	4143	MAT1A	methionine adenosyltransferase I, alpha	+
ERα_ChIPseq_1152	chr10	82050714	82051135	-1490	NM_000429	4143	MAT1A	methionine adenosyltransferase I, alpha
ERα_ChIPseq_1153	chr10	82093856	82094233	-10457	NR_070308	84332	DYDC2	DPY30 domain containing 2		+
ERα_ChIPseq_1154	chr10	82138073	82138483	21754	NM_032372	84332	DYDC2	DPY30 domain containing 2
ERα_ChIPseq_1155	chr10	82189021	82189680	15775	NM_001243782	84293	FAM213A	family with sequence similarity 213, member A
ERα_ChIPseq_1156	chr10	82196032	82196700	-17672	NM_030927	81619	TSPAN14	tetraspanin 14		+
ERα_ChIPseq_1157	chr10	82231412	82231804	17570	NM_001128309	81619	TSPAN14	tetraspanin 14
ERα_ChIPseq_1158	chr10	82258916	82259450	-31823	NR_120662	102723703	LOC102723703	uncharacterized LOC102723703	+
ERα_ChIPseq_1159	chr10	82726312	82726797	425979	NM_001145719	387694	SH2D4B	SH2 domain containing 4B	+
ERα_ChIPseq_1160	chr10	83658085	83658622	20910	NM_001165973	10718	NRG3	neuregulin 3
ERα_ChIPseq_1161	chr10	84737193	84737719	-744780	NR_120666	101929590	NRG3-AS1	NRG3 antisense RNA 1	+
ERα_ChIPseq_1162	chr10	85451684	85452348	-447169	NM_014394	27069	GHITM	growth hormone inducible transmembrane protein
ERα_ChIPseq_1163	chr10	88407347	88407926	-6678	NM_001030015	94233	OPN4	opsin 4
ERα_ChIPseq_1164	chr10	88475448	88475974	-40685	NM_004329	657	BMPR1A	bone morphogenetic protein receptor type IA
ERα_ChIPseq_1165	chr10	88721239	88721804	3233	NM_003087	6623	SNCG	synuclein gamma	+
ERα_ChIPseq_1166	chr10	88768045	88768633	-11707	NM_001146157	643161	FAM25A	family with sequence similarity 25, member A	+
ERα_ChIPseq_1167	chr10	88777291	88777675	-2563	NM_001146157	643161	FAM25A	family with sequence similarity 25, member A
ERα_ChIPseq_1168	chr10	89416987	89417597	-2184	NM_004670	9060	PAPSS2	3'-phosphoadenosine 5'-phosphosulfate synthase 2	+
ERα_ChIPseq_1169	chr10	89453456	89453849	34176	NM_001015880	9060	PAPSS2	3'-phosphoadenosine 5'-phosphosulfate synthase 2
ERα_ChIPseq_1170	chr10	89453902	89454254	34602	NM_001015880	9060	PAPSS2	3'-phosphoadenosine 5'-phosphosulfate synthase 2
ERα_ChIPseq_1171	chr10	89461226	89461668	41971	NM_001015880	9060	PAPSS2	3'-phosphoadenosine 5'-phosphosulfate synthase 2	+
ERα_ChIPseq_1172	chr10	89465081	89465839	45984	NM_001015880	9060	PAPSS2	3'-phosphoadenosine 5'-phosphosulfate synthase 2	+	+
ERα_ChIPseq_1173	chr10	90145217	90145751	197598	NM_018363	55328	RNLS	renalase, FAD-dependent amine oxidase	+
ERα_ChIPseq_1174	chr10	91608779	91609234	19756	NR_038382	643529	LINC00865	long intergenic non-protein coding RNA 865
ERα_ChIPseq_1175	chr10	91681017	91681643	35800	NR_110655	101926924	LINC01375	long intergenic non-protein coding RNA 1375
ERα_ChIPseq_1176	chr10	91681883	91682301	35038	NR_110655	101926924	LINC01375	long intergenic non-protein coding RNA 1375
ERα_ChIPseq_1177	chr10	91968266	91968696	-251351	NR_110655	101926924	LINC01375	long intergenic non-protein coding RNA 1375	+
ERα_ChIPseq_1178	chr10	93316448	93317046	54470	NR_024467	100188947	HECTD2-AS1	HECTD2 antisense RNA 1
ERα_ChIPseq_1179	chr10	93882654	93883119	120150	NM_001178137	22849	CPEB3	cytoplasmic polyadenylation element binding protein 3
ERα_ChIPseq_1180	chr10	94650794	94651297	42820	NM_019053	54536	EXOC6	exocyst complex component 6	+
ERα_ChIPseq_1181	chr10	94831319	94831936	-1605	NM_057157	1592	CYP26A1	cytochrome P450, family 26, subfamily A, polypeptide 1
ERα_ChIPseq_1182	chr10	95194610	95195458	47040	NM_133337	26509	MYOF	myoferlin	+
ERα_ChIPseq_1183	chr10	95200294	95200822	41516	NM_133337	26509	MYOF	myoferlin
ERα_ChIPseq_1184	chr10	95307125	95307622	-19049	NM_181745	338557	FFAR4	free fatty acid receptor 4
ERα_ChIPseq_1185	chr10	95330747	95331191	4547	NM_001195755	338557	FFAR4	free fatty acid receptor 4	+
ERα_ChIPseq_1186	chr10	95500908	95501688	-16268	NM_001308275	9211	LGI1	leucine-rich, glioma inactivated 1
ERα_ChIPseq_1187	chr10	96892659	96893141	-61057	NM_207321	142827	ACSM6	acyl-CoA synthetase medium-chain family member 6	+
ERα_ChIPseq_1188	chr10	97024029	97024552	26615	NM_020992	9124	PDLIM1	PDZ and LIM domain 1
ERα_ChIPseq_1189	chr10	99168179	99168741	-7333	NM_001145114	23223	RRP12	ribosomal RNA processing 12 homolog	+
ERα_ChIPseq_1190	chr10	99326039	99326901	-5728	NM_001291218	26287	ANKRD2	ankyrin repeat domain 2 (stretch responsive muscle)	+
ERα_ChIPseq_1191	chr10	99331148	99331895	-677	NM_001291218	26287	ANKRD2	ankyrin repeat domain 2 (stretch responsive muscle)	+	+
ERα_ChIPseq_1192	chr10	99339926	99340533	-3873	NM_001134670	112817	HOGA1	4-hydroxy-2-oxoglutarate aldolase 1	+
ERα_ChIPseq_1193	chr10	100026837	100027294	942	NM_032211	84171	LOXL4	lysyl oxidase-like 4
ERα_ChIPseq_1194	chr10	100028907	100029446	-1169	NM_032211	84171	LOXL4	lysyl oxidase-like 4	+
ERα_ChIPseq_1195	chr10	100074026	100074850	-46431	NM_032211	84171	LOXL4	lysyl oxidase-like 4	+
ERα_ChIPseq_1196	chr10	100083107	100083444	-55268	NM_032211	84171	LOXL4	lysyl oxidase-like 4
ERα_ChIPseq_1197	chr10	100106853	100107367	47954	NR_031619	100302133	MIR1287	microRNA 1287
ERα_ChIPseq_1198	chr10	100122862	100123310	31978	NR_031619	100302133	MIR1287	microRNA 1287	+
ERα_ChIPseq_1199	chr10	100155773	100156311	-978	NR_031619	100302133	MIR1287	microRNA 1287	+
ERα_ChIPseq_1200	chr10	100767220	100767593	-83081	NR_106762	102465253	MIR6507	microRNA 6507
ERα_ChIPseq_1201	chr10	101376980	101377281	3091	NM_031212	81894	SLC25A28	solute carrier family 25 (mitochondrial iron transporter), member 28	+
ERα_ChIPseq_1202	chr10	101765687	101766285	3690	NM_015221	23268	DNMBP	dynamin binding protein
ERα_ChIPseq_1203	chr10	101767833	101768267	1626	NM_015221	23268	DNMBP	dynamin binding protein
ERα_ChIPseq_1204	chr10	101795219	101795788	-25827	NM_015221	23268	DNMBP	dynamin binding protein	+
ERα_ChIPseq_1205	chr10	102642975	102643639	-29019	NM_001136123	55719	SLF2	SMC5-SMC6 complex localization factor 2
ERα_ChIPseq_1206	chr10	103124408	103124789	10808	NM_033637	8945	BTRC	beta-transducin repeat containing E3 ubiquitin protein ligase
ERα_ChIPseq_1207	chr10	103698111	103698631	-94694	NM_173193	30819	KCNIP2	Kv channel interacting protein 2
ERα_ChIPseq_1208	chr10	103880170	103880588	-169	NM_001113407	8861	LDB1	LIM domain binding 1	+
ERα_ChIPseq_1209	chr10	103899956	103900571	7512	NM_001288728	23082	PPRC1	peroxisome proliferator-activated receptor gamma, coactivator-related 1
ERα_ChIPseq_1210	chr10	104470232	104470968	3590	NM_004311	403	ARL3	ADP-ribosylation factor like GTPase 3	+
ERα_ChIPseq_1211	chr10	104503449	104503849	-78	NM_001083913	54838	WBP1L	WW domain binding protein 1-like
ERα_ChIPseq_1212	chr10	104573843	104574326	23206	NM_000102	1586	CYP17A1	cytochrome P450, family 17, subfamily A, polypeptide 1
ERα_ChIPseq_1213	chr10	104578731	104579114	18368	NM_000102	1586	CYP17A1	cytochrome P450, family 17, subfamily A, polypeptide 1
ERα_ChIPseq_1214	chr10	104885510	104886161	67228	NM_012229	22978	NT5C2	5'-nucleotidase, cytosolic II
ERα_ChIPseq_1215	chr10	104927930	104928564	24816	NM_012229	22978	NT5C2	5'-nucleotidase, cytosolic II	+
ERα_ChIPseq_1216	chr10	104928590	104929014	24261	NM_012229	22978	NT5C2	5'-nucleotidase, cytosolic II		+
ERα_ChIPseq_1217	chr10	105001196	105001790	-4151	NM_001143909	729020	RPEL1	ribulose-5-phosphate-3-epimerase-like 1
ERα_ChIPseq_1218	chr10	105010605	105011051	5184	NM_001143909	729020	RPEL1	ribulose-5-phosphate-3-epimerase-like 1
ERα_ChIPseq_1219	chr10	105649766	105650394	27965	NM_024928	79991	OBFC1	oligonucleotide/oligosaccharide-binding fold containing 1	+
ERα_ChIPseq_1220	chr10	105690994	105691841	-13372	NM_024928	79991	OBFC1	oligonucleotide/oligosaccharide-binding fold containing 1		+
ERα_ChIPseq_1221	chr10	106239927	106240316	-88	NR_120624	101927523	LOC101927523	uncharacterized LOC101927523
ERα_ChIPseq_1222	chr10	106240570	106241184	-844	NR_120624	101927523	LOC101927523	uncharacterized LOC101927523	+
ERα_ChIPseq_1223	chr10	110205598	110206113	-376804	NR_125760	103695365	LINC01435	long intergenic non-protein coding RNA 1435
ERα_ChIPseq_1224	chr10	110212961	110213357	-384108	NR_125760	103695365	LINC01435	long intergenic non-protein coding RNA 1435		+
ERα_ChIPseq_1225	chr10	110358556	110359183	-529818	NR_125760	103695365	LINC01435	long intergenic non-protein coding RNA 1435
ERα_ChIPseq_1226	chr10	112180667	112181022	-76781	NM_004419	1847	DUSP5	dual specificity phosphatase 5
ERα_ChIPseq_1227	chr10	112188945	112189337	-68484	NM_004419	1847	DUSP5	dual specificity phosphatase 5
ERα_ChIPseq_1228	chr10	112216340	112216847	-41032	NM_004419	1847	DUSP5	dual specificity phosphatase 5		+
ERα_ChIPseq_1229	chr10	112534567	112535161	95798	NR_026932	282997	PDCD4-AS1	PDCD4 antisense RNA 1
ERα_ChIPseq_1230	chr10	112549560	112550079	80843	NR_026932	282997	PDCD4-AS1	PDCD4 antisense RNA 1	+	+
ERα_ChIPseq_1231	chr10	112582336	112582696	48146	NR_026932	282997	PDCD4-AS1	PDCD4 antisense RNA 1	+
ERα_ChIPseq_1232	chr10	112612074	112612455	18398	NR_026932	282997	PDCD4-AS1	PDCD4 antisense RNA 1	+
ERα_ChIPseq_1233	chr10	114055747	114056218	-3388	NR_106771	102466189	MIR6715A	microRNA 6715a	+
ERα_ChIPseq_1234	chr10	114538481	114538916	-44557	NR_120684	103344931	LOC103344931	uncharacterized LOC103344931	+
ERα_ChIPseq_1235	chr10	114538968	114539365	-44089	NR_120684	103344931	LOC103344931	uncharacterized LOC103344931
ERα_ChIPseq_1236	chr10	114564113	114564645	-18876	NR_120684	103344931	LOC103344931	uncharacterized LOC103344931
ERα_ChIPseq_1237	chr10	115438130	115439007	-353	NM_001267056	840	CASP7	caspase 7	+	+
ERα_ChIPseq_1238	chr10	115510875	115511329	-111	NM_001193435	79949	PLEKHS1	pleckstrin homology domain containing, family S member 1	+
ERα_ChIPseq_1239	chr10	115613940	115614542	-78	NM_001271816	9937	DCLRE1A	DNA cross-link repair 1A	+
ERα_ChIPseq_1240	chr10	115681687	115682125	67515	NM_198514	374354	NHLRC2	NHL repeat containing 2
ERα_ChIPseq_1241	chr10	115687038	115687539	72897	NM_198514	374354	NHLRC2	NHL repeat containing 2
ERα_ChIPseq_1242	chr10	115718241	115718752	-85310	NM_000684	153	ADRB1	adrenoceptor beta 1	+
ERα_ChIPseq_1243	chr10	115719163	115719565	-84442	NM_000684	153	ADRB1	adrenoceptor beta 1		+
ERα_ChIPseq_1244	chr10	115726632	115727031	-76975	NM_000684	153	ADRB1	adrenoceptor beta 1
ERα_ChIPseq_1245	chr10	115742297	115742882	-61217	NM_000684	153	ADRB1	adrenoceptor beta 1	+	+
ERα_ChIPseq_1246	chr10	115802965	115803321	-663	NM_000684	153	ADRB1	adrenoceptor beta 1
ERα_ChIPseq_1247	chr10	115816732	115817237	13178	NM_000684	153	ADRB1	adrenoceptor beta 1	+
ERα_ChIPseq_1248	chr10	115998848	115999412	117	NM_001272046	340706	VWA2	von Willebrand factor A domain containing 2	+
ERα_ChIPseq_1249	chr10	116096727	116097110	67619	NM_001001936	84632	AFAP1L2	actin filament associated protein 1-like 2
ERα_ChIPseq_1250	chr10	116109294	116109863	54959	NM_001001936	84632	AFAP1L2	actin filament associated protein 1-like 2	+
ERα_ChIPseq_1251	chr10	116267173	116267532	19333	NM_006720	3983	ABLIM1	actin binding LIM protein 1		+
ERα_ChIPseq_1252	chr10	116267818	116268116	18718	NM_006720	3983	ABLIM1	actin binding LIM protein 1		+
ERα_ChIPseq_1253	chr10	117191811	117192314	338938	NM_001276282	26033	ATRNL1	attractin-like 1
ERα_ChIPseq_1254	chr10	117192776	117193213	339870	NM_001276282	26033	ATRNL1	attractin-like 1	+
ERα_ChIPseq_1255	chr10	117424136	117424677	571282	NM_001276282	26033	ATRNL1	attractin-like 1	+
ERα_ChIPseq_1256	chr10	117430098	117430595	577222	NM_001276282	26033	ATRNL1	attractin-like 1
ERα_ChIPseq_1257	chr10	117469797	117470196	561823	NM_145793	2674	GFRA1	GDNF family receptor alpha 1
ERα_ChIPseq_1258	chr10	117679539	117679906	352097	NM_145793	2674	GFRA1	GDNF family receptor alpha 1	+
ERα_ChIPseq_1259	chr10	117757584	117758209	273923	NM_145793	2674	GFRA1	GDNF family receptor alpha 1	+
ERα_ChIPseq_1260	chr10	117840017	117840655	191483	NM_145793	2674	GFRA1	GDNF family receptor alpha 1	+	+
ERα_ChIPseq_1261	chr10	117902800	117903354	128742	NM_145793	2674	GFRA1	GDNF family receptor alpha 1	+
ERα_ChIPseq_1262	chr10	118473256	118473685	28615	NM_025015	259217	HSPA12A	heat shock 70kDa protein 12A
ERα_ChIPseq_1263	chr10	119346103	119346492	-41718	NR_002791	196047	EMX2OS	EMX2 opposite strand/antisense RNA
ERα_ChIPseq_1264	chr10	121077005	121077477	-60243	NR_039829	100616398	MIR4681	microRNA 4681	+	+
ERα_ChIPseq_1265	chr10	121224560	121225031	71250	NM_002925	6001	RGS10	regulator of G-protein signaling 10
ERα_ChIPseq_1266	chr10	121302117	121302808	-240	NM_001005339	6001	RGS10	regulator of G-protein signaling 10	+
ERα_ChIPseq_1267	chr10	121423478	121424191	12952	NM_004281	9531	BAG3	BCL2-associated athanogene 3
ERα_ChIPseq_1268	chr10	121427452	121427968	16828	NM_004281	9531	BAG3	BCL2-associated athanogene 3	+
ERα_ChIPseq_1269	chr10	123269527	123270231	83602	NM_001144913	2263	FGFR2	fibroblast growth factor receptor 2
ERα_ChIPseq_1270	chr10	123271588	123272080	81647	NM_001144913	2263	FGFR2	fibroblast growth factor receptor 2
ERα_ChIPseq_1271	chr10	123273854	123274317	79396	NM_001144913	2263	FGFR2	fibroblast growth factor receptor 2
ERα_ChIPseq_1272	chr10	123313159	123313766	40019	NM_001144913	2263	FGFR2	fibroblast growth factor receptor 2
ERα_ChIPseq_1273	chr10	123315774	123316378	37405	NM_001144913	2263	FGFR2	fibroblast growth factor receptor 2
ERα_ChIPseq_1274	chr10	123344046	123344396	9260	NM_001144913	2263	FGFR2	fibroblast growth factor receptor 2
ERα_ChIPseq_1275	chr10	124889064	124889551	-6260	NM_001105574	340784	HMX3	H6 family homeobox 3
ERα_ChIPseq_1276	chr10	124987340	124987691	73755	NM_004725	9184	BUB3	BUB3 mitotic checkpoint protein
ERα_ChIPseq_1277	chr10	125013821	125015269	100785	NM_004725	9184	BUB3	BUB3 mitotic checkpoint protein
ERα_ChIPseq_1278	chr10	125230843	125231272	-194814	NM_153442	2849	GPR26	G protein-coupled receptor 26
ERα_ChIPseq_1279	chr10	125396228	125396806	-29354	NM_153442	2849	GPR26	G protein-coupled receptor 26	+
ERα_ChIPseq_1280	chr10	125481249	125481948	55727	NM_153442	2849	GPR26	G protein-coupled receptor 26	+
ERα_ChIPseq_1281	chr10	125503308	125504007	77786	NM_153442	2849	GPR26	G protein-coupled receptor 26	+	+
ERα_ChIPseq_1282	chr10	125510770	125511190	85109	NM_153442	2849	GPR26	G protein-coupled receptor 26
ERα_ChIPseq_1283	chr10	125996881	125997260	110475	NM_000274	4942	OAT	ornithine aminotransferase	+
ERα_ChIPseq_1284	chr10	126074631	126075086	32687	NM_000274	4942	OAT	ornithine aminotransferase	+	+
ERα_ChIPseq_1285	chr10	126195622	126196112	45526	NM_001167880	64077	LHPP	phospholysine phosphohistidine inorganic pyrophosphate phosphatase
ERα_ChIPseq_1286	chr10	126196198	126196552	46034	NM_001167880	64077	LHPP	phospholysine phosphohistidine inorganic pyrophosphate phosphatase
ERα_ChIPseq_1287	chr10	126734292	126734645	-13029	NR_036178	100423041	MIR4296	microRNA 4296
ERα_ChIPseq_1288	chr10	126812207	126812810	34876	NM_001290215	1488	CTBP2	C-terminal binding protein 2		+
ERα_ChIPseq_1289	chr10	126817866	126818333	29285	NM_001290215	1488	CTBP2	C-terminal binding protein 2
ERα_ChIPseq_1290	chr10	127313194	127313836	50575	NR_023362	100169752	TEX36-AS1	TEX36 antisense RNA 1	+	+
ERα_ChIPseq_1291	chr10	127322784	127323213	48715	NM_001128202	387718	TEX36	testis expressed 36
ERα_ChIPseq_1292	chr10	127390119	127390504	17751	NR_033847	399821	FLJ37035	uncharacterized LOC399821
ERα_ChIPseq_1293	chr10	127747937	127748653	-86453	NR_102707	101410540	FANK1-AS1	FANK1 antisense RNA 1	+	+
ERα_ChIPseq_1294	chr10	127750992	127751453	-89380	NR_102707	101410540	FANK1-AS1	FANK1 antisense RNA 1
ERα_ChIPseq_1295	chr10	127754998	127755446	-93380	NR_102707	101410540	FANK1-AS1	FANK1 antisense RNA 1
ERα_ChIPseq_1296	chr10	127864328	127864887	-202765	NR_102707	101410540	FANK1-AS1	FANK1 antisense RNA 1	+
ERα_ChIPseq_1297	chr10	127939997	127940944	136657	NM_001288975	8038	ADAM12	ADAM metallopeptidase domain 12
ERα_ChIPseq_1298	chr10	128146891	128147324	-36659	NR_073453	101101772	LINC00601	long intergenic non-protein coding RNA 601	+
ERα_ChIPseq_1299	chr10	128232261	128232681	-22461	NM_001004298	118611	C10orf90	chromosome 10 open reading frame 90	+
ERα_ChIPseq_1300	chr10	128606920	128607496	13230	NM_001380	1793	DOCK1	dedicator of cytokinesis 1	+	+
ERα_ChIPseq_1301	chr10	129595547	129595985	60228	NM_207426	399823	FOXI2	forkhead box I2
ERα_ChIPseq_1302	chr10	129706850	129707342	1771	NM_001316676	5791	PTPRE	protein tyrosine phosphatase, receptor type, E
ERα_ChIPseq_1303	chr10	129721405	129721699	16227	NM_001316676	5791	PTPRE	protein tyrosine phosphatase, receptor type, E	+
ERα_ChIPseq_1304	chr10	129742500	129743001	37425	NM_001316676	5791	PTPRE	protein tyrosine phosphatase, receptor type, E
ERα_ChIPseq_1305	chr10	130017370	130017984	-66537	NR_120619	101927381	LINC01163	long intergenic non-protein coding RNA 1163
ERα_ChIPseq_1306	chr10	131021599	131022217	-243540	NM_002412	4255	MGMT	O-6-methylguanine-DNA methyltransferase
ERα_ChIPseq_1307	chr10	131022240	131022624	-243016	NM_002412	4255	MGMT	O-6-methylguanine-DNA methyltransferase
ERα_ChIPseq_1308	chr10	132182082	132183194	247999	NM_001199868	10539	GLRX3	glutaredoxin 3
ERα_ChIPseq_1309	chr10	133978019	133978526	-22142	NM_006426	10570	DPYSL4	dihydropyrimidinase-like 4	+
ERα_ChIPseq_1310	chr10	134145302	134145787	-70	NM_001143759	80313	LRRC27	leucine rich repeat containing 27
ERα_ChIPseq_1311	chr10	134177645	134178499	27461	NM_001309474	80313	LRRC27	leucine rich repeat containing 27
ERα_ChIPseq_1312	chr10	134262327	134262901	3900	NM_173541	170393	C10orf91	chromosome 10 open reading frame 91
ERα_ChIPseq_1313	chr10	134278598	134278928	20049	NM_173541	170393	C10orf91	chromosome 10 open reading frame 91
ERα_ChIPseq_1314	chr10	134282564	134283105	24120	NM_173541	170393	C10orf91	chromosome 10 open reading frame 91	+
ERα_ChIPseq_1315	chr10	134306827	134307471	-44204	NM_005539	3632	INPP5A	inositol polyphosphate-5-phosphatase A	+
ERα_ChIPseq_1316	chr10	134311391	134312031	-39642	NM_005539	3632	INPP5A	inositol polyphosphate-5-phosphatase A
ERα_ChIPseq_1317	chr10	134346973	134347511	-4111	NM_005539	3632	INPP5A	inositol polyphosphate-5-phosphatase A	+
ERα_ChIPseq_1318	chr10	134352941	134353288	1761	NM_005539	3632	INPP5A	inositol polyphosphate-5-phosphatase A	+
ERα_ChIPseq_1319	chr10	134363030	134363478	11901	NM_005539	3632	INPP5A	inositol polyphosphate-5-phosphatase A	+
ERα_ChIPseq_1320	chr10	134367926	134368671	16945	NM_005539	3632	INPP5A	inositol polyphosphate-5-phosphatase A
ERα_ChIPseq_1321	chr10	134368858	134369400	17776	NM_005539	3632	INPP5A	inositol polyphosphate-5-phosphatase A
ERα_ChIPseq_1322	chr10	134370499	134371080	19436	NM_005539	3632	INPP5A	inositol polyphosphate-5-phosphatase A
ERα_ChIPseq_1323	chr10	134385588	134386136	34509	NM_005539	3632	INPP5A	inositol polyphosphate-5-phosphatase A	+
ERα_ChIPseq_1324	chr10	134572466	134572802	26903	NM_177400	84504	NKX6-2	NK6 homeobox 2	+
ERα_ChIPseq_1325	chr10	134574407	134574848	24910	NM_177400	84504	NKX6-2	NK6 homeobox 2
ERα_ChIPseq_1326	chr10	134577682	134578759	21317	NM_177400	84504	NKX6-2	NK6 homeobox 2
ERα_ChIPseq_1327	chr10	134728779	134729298	27051	NM_001200049	54777	CFAP46	cilia and flagella associated protein 46
ERα_ChIPseq_1328	chr10	134841563	134842198	58321	NR_111905	100128127	ADGRA1-AS1	adhesion G protein-coupled receptor A1 antisense RNA 1
ERα_ChIPseq_1329	chr10	134925210	134925616	9663	NM_001291085	84435	ADGRA1	adhesion G protein-coupled receptor A1
ERα_ChIPseq_1330	chr10	134987918	134989007	14491	NM_152643	85442	KNDC1	kinase non-catalytic C-lobe domain (KIND) containing 1
ERα_ChIPseq_1331	chr10	134989027	134989799	15442	NM_152643	85442	KNDC1	kinase non-catalytic C-lobe domain (KIND) containing 1
ERα_ChIPseq_1332	chr10	135092108	135092758	-2026	NM_001164489	101	ADAM8	ADAM metallopeptidase domain 8
ERα_ChIPseq_1333	chr10	135349782	135350493	9270	NM_000773	1571	CYP2E1	cytochrome P450, family 2, subfamily E, polypeptide 1
ERα_ChIPseq_1334	chr10	135379848	135380802	-1187	NM_001143763	93426	SYCE1	synaptonemal complex central element protein 1
ERα_ChIPseq_1335	chr11	175383	176648	-17065	NM_001097610	653486	SCGB1C2	secretoglobin, family 1C, member 2
ERα_ChIPseq_1336	chr11	188779	189311	-4035	NM_001097610	653486	SCGB1C2	secretoglobin, family 1C, member 2
ERα_ChIPseq_1337	chr11	191558	192156	-1223	NM_001097610	653486	SCGB1C2	secretoglobin, family 1C, member 2
ERα_ChIPseq_1338	chr11	195653	195997	-936	NM_053280	113746	ODF3	outer dense fiber of sperm tails 3
ERα_ChIPseq_1339	chr11	395884	396431	1974	NM_007183	11187	PKP3	plakophilin 3
ERα_ChIPseq_1340	chr11	470058	470475	19986	NM_030783	81490	PTDSS2	phosphatidylserine synthase 2		+
ERα_ChIPseq_1341	chr11	539758	540245	2479	NM_198075	115399	LRRC56	leucine rich repeat containing 56
ERα_ChIPseq_1342	chr11	569485	569988	-1279	NR_038262	100506211	MIR210HG	MIR210 host gene	+
ERα_ChIPseq_1343	chr11	642683	642893	5483	NM_000797	1815	DRD4	dopamine receptor D4
ERα_ChIPseq_1344	chr11	647622	648261	10636	NM_000797	1815	DRD4	dopamine receptor D4
ERα_ChIPseq_1345	chr11	1016535	1018172	19353	NM_005961	4588	MUC6	mucin 6, oligomeric mucus/gel-forming	+
ERα_ChIPseq_1346	chr11	1018301	1018586	18263	NM_005961	4588	MUC6	mucin 6, oligomeric mucus/gel-forming	+
ERα_ChIPseq_1347	chr11	1092589	1093655	18247	NM_002457	4583	MUC2	mucin 2, oligomeric mucus/gel-forming
ERα_ChIPseq_1348	chr11	1099976	1100577	25401	NM_002457	4583	MUC2	mucin 2, oligomeric mucus/gel-forming
ERα_ChIPseq_1349	chr11	1118767	1119497	-32448	NM_001304359	4586	MUC5AC	mucin 5AC, oligomeric mucus/gel-forming
ERα_ChIPseq_1350	chr11	1275499	1275808	-2182	NR_106802	102466725	MIR6744	microRNA 6744	+
ERα_ChIPseq_1351	chr11	1507100	1507670	624	NM_001172223	81532	MOB2	MOB kinase activator 2		+
ERα_ChIPseq_1352	chr11	1515872	1516423	-8138	NM_001172223	81532	MOB2	MOB kinase activator 2
ERα_ChIPseq_1353	chr11	1671417	1671902	-15170	NR_026643	387742	FAM99A	family with sequence similarity 99, member A (non-protein coding)
ERα_ChIPseq_1354	chr11	1691625	1692280	5123	NR_026643	387742	FAM99A	family with sequence similarity 99, member A (non-protein coding)
ERα_ChIPseq_1355	chr11	1726971	1727457	8789	NM_001012416	440023	KRTAP5-6	keratin associated protein 5-6
ERα_ChIPseq_1356	chr11	1770490	1771058	1050	NM_001170820	402778	IFITM10	interferon induced transmembrane protein 10		+
ERα_ChIPseq_1357	chr11	1771805	1772191	-174	NM_001170820	402778	IFITM10	interferon induced transmembrane protein 10
ERα_ChIPseq_1358	chr11	1790402	1791006	-5482	NM_001909	1509	CTSD	cathepsin D
ERα_ChIPseq_1359	chr11	1791899	1792502	-6978	NM_001909	1509	CTSD	cathepsin D	+
ERα_ChIPseq_1360	chr11	1793612	1794303	-8735	NM_001909	1509	CTSD	cathepsin D	+
ERα_ChIPseq_1361	chr11	1804249	1804529	-19167	NM_001909	1509	CTSD	cathepsin D
ERα_ChIPseq_1362	chr11	1817443	1818340	-32669	NM_001909	1509	CTSD	cathepsin D
ERα_ChIPseq_1363	chr11	1842544	1843040	-12748	NM_001290334	90019	SYT8	synaptotagmin VIII
ERα_ChIPseq_1364	chr11	1848471	1848839	-6885	NM_001290334	90019	SYT8	synaptotagmin VIII
ERα_ChIPseq_1365	chr11	1849653	1850233	-5597	NM_001290334	90019	SYT8	synaptotagmin VIII	+	+
ERα_ChIPseq_1366	chr11	1850272	1850790	-5009	NM_001290334	90019	SYT8	synaptotagmin VIII	+
ERα_ChIPseq_1367	chr11	1852081	1852493	-3253	NM_001290334	90019	SYT8	synaptotagmin VIII
ERα_ChIPseq_1368	chr11	1855183	1855666	-116	NM_001290334	90019	SYT8	synaptotagmin VIII		+
ERα_ChIPseq_1369	chr11	1953968	1954327	13348	NM_001042782	7140	TNNT3	troponin T type 3 (skeletal, fast)
ERα_ChIPseq_1370	chr11	2004140	2004715	6723	NR_024471	100133545	MRPL23-AS1	MRPL23 antisense RNA 1	+
ERα_ChIPseq_1371	chr11	2008049	2008870	2691	NR_024471	100133545	MRPL23-AS1	MRPL23 antisense RNA 1
ERα_ChIPseq_1372	chr11	2147977	2148504	7199	NR_030158	619552	MIR483	microRNA 483
ERα_ChIPseq_1373	chr11	2181489	2181989	700	NM_001185097	3630	INS	insulin
ERα_ChIPseq_1374	chr11	2186394	2186931	-4223	NR_003512	723961	INS-IGF2	INS-IGF2 readthrough	+
ERα_ChIPseq_1375	chr11	2189832	2191100	2569	NM_000360	7054	TH	tyrosine hydroxylase	+
ERα_ChIPseq_1376	chr11	2212487	2212760	18330	NR_039834	100616126	MIR4686	microRNA 4686
ERα_ChIPseq_1377	chr11	2214363	2215070	20423	NR_039834	100616126	MIR4686	microRNA 4686	+
ERα_ChIPseq_1378	chr11	2504614	2505299	22272	NM_181798	3784	KCNQ1	potassium channel, voltage gated KQT-like subfamily Q, member 1	+
ERα_ChIPseq_1379	chr11	3434995	3435439	-22072	NR_044999	10821	OR7E12P	olfactory receptor, family 7, subfamily E, member 12 pseudogene	+
ERα_ChIPseq_1380	chr11	3674934	3676096	9154	NM_004314	417	ART1	ADP-ribosyltransferase 1
ERα_ChIPseq_1381	chr11	3837670	3838084	8111	NM_014489	27315	PGAP2	post-GPI attachment to proteins 2	+
ERα_ChIPseq_1382	chr11	3840151	3840502	10560	NM_014489	27315	PGAP2	post-GPI attachment to proteins 2	+
ERα_ChIPseq_1383	chr11	9111109	9111572	586	NR_049874	100847015	MIR5691	microRNA 5691
ERα_ChIPseq_1384	chr11	9113296	9113778	-387	NM_020974	57758	SCUBE2	signal peptide, CUB domain, EGF-like 2
ERα_ChIPseq_1385	chr11	9131443	9131968	15795	NR_027713	283102	KRT8P41	keratin 8 pseudogene 41	+
ERα_ChIPseq_1386	chr11	10072068	10072433	211561	NR_120539	101928008	LOC101928008	uncharacterized LOC101928008		+
ERα_ChIPseq_1387	chr11	10073559	10073902	213041	NR_120539	101928008	LOC101928008	uncharacterized LOC101928008
ERα_ChIPseq_1388	chr11	10764274	10764714	-8040	NM_014633	9646	CTR9	CTR9 homolog, Paf1/RNA polymerase II complex component	+
ERα_ChIPseq_1389	chr11	11476310	11476758	-101630	NM_001256686	283106	CSNK2A3	casein kinase 2, alpha 3 polypeptide
ERα_ChIPseq_1390	chr11	11854319	11854792	-8415	NM_001282659	55031	USP47	ubiquitin specific peptidase 47
ERα_ChIPseq_1391	chr11	11993711	11994160	36251	NM_001018057	27122	DKK3	dickkopf WNT signaling pathway inhibitor 3	+
ERα_ChIPseq_1392	chr11	12013880	12014338	16077	NM_001018057	27122	DKK3	dickkopf WNT signaling pathway inhibitor 3
ERα_ChIPseq_1393	chr11	12132020	12132475	124	NM_001282668	9645	MICAL2	microtubule associated monooxygenase, calponin and LIM domain containing 2
ERα_ChIPseq_1394	chr11	12254910	12255381	-53302	NM_032867	84953	MICALCL	MICAL C-terminal like
ERα_ChIPseq_1395	chr11	12267001	12267558	-41168	NM_032867	84953	MICALCL	MICAL C-terminal like	+
ERα_ChIPseq_1396	chr11	12269865	12270478	-38276	NM_032867	84953	MICALCL	MICAL C-terminal like
ERα_ChIPseq_1397	chr11	12662506	12662846	-33293	NM_021961	7003	TEAD1	TEA domain family member 1 (SV40 transcriptional enhancer factor)
ERα_ChIPseq_1398	chr11	12705359	12705927	9674	NM_021961	7003	TEAD1	TEA domain family member 1 (SV40 transcriptional enhancer factor)
ERα_ChIPseq_1399	chr11	12749882	12750248	54096	NM_021961	7003	TEAD1	TEA domain family member 1 (SV40 transcriptional enhancer factor)	+
ERα_ChIPseq_1400	chr11	12790221	12790639	94461	NM_021961	7003	TEAD1	TEA domain family member 1 (SV40 transcriptional enhancer factor)		+
ERα_ChIPseq_1401	chr11	12816691	12817068	120910	NM_021961	7003	TEAD1	TEA domain family member 1 (SV40 transcriptional enhancer factor)
ERα_ChIPseq_1402	chr11	12824069	12824500	128315	NM_021961	7003	TEAD1	TEA domain family member 1 (SV40 transcriptional enhancer factor)
ERα_ChIPseq_1403	chr11	12850698	12851158	154959	NM_021961	7003	TEAD1	TEA domain family member 1 (SV40 transcriptional enhancer factor)	+
ERα_ChIPseq_1404	chr11	12855650	12856106	155217	NR_038904	100506305	LINC00958	long intergenic non-protein coding RNA 958
ERα_ChIPseq_1405	chr11	12980640	12981046	30252	NR_038904	100506305	LINC00958	long intergenic non-protein coding RNA 958
ERα_ChIPseq_1406	chr11	13356688	13357267	57703	NM_001297722	406	ARNTL	aryl hydrocarbon receptor nuclear translocator-like	+
ERα_ChIPseq_1407	chr11	13740959	13741279	50913	NM_032228	84188	FAR1	fatty acyl CoA reductase 1
ERα_ChIPseq_1408	chr11	14037228	14037672	53266	NM_006108	10418	SPON1	spondin 1, extracellular matrix protein
ERα_ChIPseq_1409	chr11	15349258	15349628	178795	NM_001278313	387755	INSC	inscuteable homolog (Drosophila)
ERα_ChIPseq_1410	chr11	15515433	15516044	-149693	NM_001293172	102724957	LOC102724957	uncharacterized LOC102724957
ERα_ChIPseq_1411	chr11	15636975	15637477	-28205	NM_001293172	102724957	LOC102724957	uncharacterized LOC102724957	+
ERα_ChIPseq_1412	chr11	15716619	15717050	51403	NM_001293172	102724957	LOC102724957	uncharacterized LOC102724957		+
ERα_ChIPseq_1413	chr11	15923255	15923728	67676	NR_106721	102464826	MIR6073	microRNA 6073	+
ERα_ChIPseq_1414	chr11	15924831	15925266	66119	NR_106721	102464826	MIR6073	microRNA 6073
ERα_ChIPseq_1415	chr11	16132341	16132670	-141338	NR_106721	102464826	MIR6073	microRNA 6073
ERα_ChIPseq_1416	chr11	16978073	16978825	57514	NM_175058	144100	PLEKHA7	pleckstrin homology domain containing, family A member 7
ERα_ChIPseq_1417	chr11	17003964	17004462	31750	NM_175058	144100	PLEKHA7	pleckstrin homology domain containing, family A member 7
ERα_ChIPseq_1418	chr11	17008057	17008511	27679	NM_175058	144100	PLEKHA7	pleckstrin homology domain containing, family A member 7	+
ERα_ChIPseq_1419	chr11	17008633	17009132	27081	NM_175058	144100	PLEKHA7	pleckstrin homology domain containing, family A member 7
ERα_ChIPseq_1420	chr11	17010817	17011350	24880	NM_175058	144100	PLEKHA7	pleckstrin homology domain containing, family A member 7	+
ERα_ChIPseq_1421	chr11	17221680	17222114	-30543	NM_002645	5286	PIK3C2A	phosphatidylinositol-4-phosphate 3-kinase, catalytic subunit type 2 alpha		+
ERα_ChIPseq_1422	chr11	17427101	17427648	-16496	NM_001166290	3767	KCNJ11	potassium channel, inwardly rectifying subfamily J, member 11
ERα_ChIPseq_1423	chr11	17791594	17791947	34275	NM_004976	3746	KCNC1	potassium channel, voltage gated Shaw related subfamily C, member 1		+
ERα_ChIPseq_1424	chr11	17946218	17946737	88232	NM_012139	26297	SERGEF	secretion regulating guanine nucleotide exchange factor		+
ERα_ChIPseq_1425	chr11	18691437	18691869	-28629	NM_153347	144110	TMEM86A	transmembrane protein 86A		+
ERα_ChIPseq_1426	chr11	19290401	19290960	-27478	NM_001256372	79733	E2F8	E2F transcription factor 8
ERα_ChIPseq_1427	chr11	19441383	19441946	69393	NM_001111018	89797	NAV2	neuron navigator 2
ERα_ChIPseq_1428	chr11	19818043	19818392	-36588	NR_039843	100616426	MIR4694	microRNA 4694	+
ERα_ChIPseq_1429	chr11	19940780	19941317	-103054	NM_001111019	89797	NAV2	neuron navigator 2	+
ERα_ChIPseq_1430	chr11	19944222	19944665	-99659	NM_001111019	89797	NAV2	neuron navigator 2
ERα_ChIPseq_1431	chr11	19946021	19946500	-97842	NM_001111019	89797	NAV2	neuron navigator 2
ERα_ChIPseq_1432	chr11	20016128	20017188	-27444	NM_001111019	89797	NAV2	neuron navigator 2
ERα_ChIPseq_1433	chr11	20053329	20053941	9533	NM_001111019	89797	NAV2	neuron navigator 2	+
ERα_ChIPseq_1434	chr11	20057109	20058439	13075	NR_046672	100874014	NAV2-AS2	NAV2 antisense RNA 2		+
ERα_ChIPseq_1435	chr11	21971640	21971951	-242927	NM_213599	203859	ANO5	anoctamin 5
ERα_ChIPseq_1436	chr11	24122346	24122801	-395943	NM_001009909	338645	LUZP2	leucine zipper protein 2	+
ERα_ChIPseq_1437	chr11	24274888	24275586	-243279	NM_001009909	338645	LUZP2	leucine zipper protein 2	+
ERα_ChIPseq_1438	chr11	27451676	27452040	-41420	NR_131169	105376671	LOC105376671	uncharacterized LOC105376671
ERα_ChIPseq_1439	chr11	28364637	28365190	134182	NR_107035	102466876	MIR8068	microRNA 8068	+
ERα_ChIPseq_1440	chr11	30387573	30388108	43194	NM_152316	120534	ARL14EP	ADP-ribosylation factor like GTPase 14 effector protein
ERα_ChIPseq_1441	chr11	30432745	30433344	88398	NM_152316	120534	ARL14EP	ADP-ribosylation factor like GTPase 14 effector protein	+
ERα_ChIPseq_1442	chr11	30439962	30440459	95564	NM_152316	120534	ARL14EP	ADP-ribosylation factor like GTPase 14 effector protein
ERα_ChIPseq_1443	chr11	30444414	30444737	99929	NM_152316	120534	ARL14EP	ADP-ribosylation factor like GTPase 14 effector protein
ERα_ChIPseq_1444	chr11	30457053	30457674	112717	NM_152316	120534	ARL14EP	ADP-ribosylation factor like GTPase 14 effector protein
ERα_ChIPseq_1445	chr11	30460075	30460548	115665	NM_152316	120534	ARL14EP	ADP-ribosylation factor like GTPase 14 effector protein
ERα_ChIPseq_1446	chr11	30542979	30543634	58734	NM_001584	744	MPPED2	metallophosphoesterase domain containing 2	+
ERα_ChIPseq_1447	chr11	30549037	30549475	52784	NM_001584	744	MPPED2	metallophosphoesterase domain containing 2	+
ERα_ChIPseq_1448	chr11	30639327	30639614	-31540	NM_001145399	744	MPPED2	metallophosphoesterase domain containing 2		+
ERα_ChIPseq_1449	chr11	30792081	30792396	-184308	NM_001145399	744	MPPED2	metallophosphoesterase domain containing 2
ERα_ChIPseq_1450	chr11	30832823	30833309	181167	NM_020869	100506627	DCDC5	doublecortin domain containing 5
ERα_ChIPseq_1451	chr11	30840160	30840612	173847	NM_020869	100506627	DCDC5	doublecortin domain containing 5
ERα_ChIPseq_1452	chr11	30890061	30890659	123873	NM_020869	100506627	DCDC5	doublecortin domain containing 5
ERα_ChIPseq_1453	chr11	30932658	30933287	81261	NM_020869	100506627	DCDC5	doublecortin domain containing 5		+
ERα_ChIPseq_1454	chr11	33639177	33639630	75526	NM_012194	25758	KIAA1549L	KIAA1549-like
ERα_ChIPseq_1455	chr11	34306360	34306881	72935	NM_145804	25841	ABTB2	ankyrin repeat and BTB (POZ) domain containing 2	+
ERα_ChIPseq_1456	chr11	34317825	34318276	61505	NM_145804	25841	ABTB2	ankyrin repeat and BTB (POZ) domain containing 2	+	+
ERα_ChIPseq_1457	chr11	34655213	34655500	1345	NM_001206616	26298	EHF	ets homologous factor
ERα_ChIPseq_1458	chr11	35119273	35119874	40006	NR_120528	100507144	LOC100507144	uncharacterized LOC100507144	+	+
ERα_ChIPseq_1459	chr11	35285749	35286236	125575	NM_001202556	960	CD44	CD44 molecule (Indian blood group)
ERα_ChIPseq_1460	chr11	35296983	35297414	136781	NM_001202556	960	CD44	CD44 molecule (Indian blood group)
ERα_ChIPseq_1461	chr11	35297877	35298446	137744	NM_001202556	960	CD44	CD44 molecule (Indian blood group)
ERα_ChIPseq_1462	chr11	35317298	35317814	123549	NM_004171	6506	SLC1A2	solute carrier family 1 (glial high affinity glutamate transporter), member 2		+
ERα_ChIPseq_1463	chr11	35387367	35387878	53483	NM_004171	6506	SLC1A2	solute carrier family 1 (glial high affinity glutamate transporter), member 2	+
ERα_ChIPseq_1464	chr11	35411340	35411826	29522	NM_004171	6506	SLC1A2	solute carrier family 1 (glial high affinity glutamate transporter), member 2	+
ERα_ChIPseq_1465	chr11	35412302	35412982	28463	NM_004171	6506	SLC1A2	solute carrier family 1 (glial high affinity glutamate transporter), member 2
ERα_ChIPseq_1466	chr11	35819311	35819901	135306	NM_017583	54765	TRIM44	tripartite motif containing 44	+
ERα_ChIPseq_1467	chr11	36330947	36331369	13433	NM_001160167	79899	PRR5L	proline rich 5 like		+
ERα_ChIPseq_1468	chr11	38192581	38192905	475163	NR_120555	103312105	LOC103312105	uncharacterized LOC103312105
ERα_ChIPseq_1469	chr11	38482408	38482915	185245	NR_120555	103312105	LOC103312105	uncharacterized LOC103312105		+
ERα_ChIPseq_1470	chr11	38579566	38580187	88030	NR_120555	103312105	LOC103312105	uncharacterized LOC103312105
ERα_ChIPseq_1471	chr11	38812856	38813163	142601	NR_120553	101928536	LINC01493	long intergenic non-protein coding RNA 1493	+
ERα_ChIPseq_1472	chr11	38993411	38994071	323333	NR_120553	101928536	LINC01493	long intergenic non-protein coding RNA 1493	+
ERα_ChIPseq_1473	chr11	39011811	39012196	341595	NR_120553	101928536	LINC01493	long intergenic non-protein coding RNA 1493	+
ERα_ChIPseq_1474	chr11	39016060	39016579	345911	NR_120553	101928536	LINC01493	long intergenic non-protein coding RNA 1493		+
ERα_ChIPseq_1475	chr11	44322238	44322964	9115	NM_021926	60529	ALX4	ALX homeobox 4	+
ERα_ChIPseq_1476	chr11	44972153	44972630	217	NM_006034	9537	TP53I11	tumor protein p53 inducible protein 11
ERα_ChIPseq_1477	chr11	45007401	45007864	12179	NR_026681	221122	LOC221122	uncharacterized LOC221122	+
ERα_ChIPseq_1478	chr11	45430429	45430924	37728	NR_122071	399886	LOC399886	uncharacterized LOC399886	+
ERα_ChIPseq_1479	chr11	46255528	46255942	-43454	NM_052854	90993	CREB3L1	cAMP responsive element binding protein 3-like 1	+
ERα_ChIPseq_1480	chr11	46385073	46385721	2252	NM_001105540	8525	DGKZ	diacylglycerol kinase, zeta	+
ERα_ChIPseq_1481	chr11	46510853	46511407	-37691	NR_036117	100422827	MIR3160-1	microRNA 3160-1	+	+
ERα_ChIPseq_1482	chr11	46638492	46639287	63	NM_001142673	9776	ATG13	autophagy related 13
ERα_ChIPseq_1483	chr11	46721998	46722538	-49	NM_024741	79797	ZNF408	zinc finger protein 408
ERα_ChIPseq_1484	chr11	46724740	46725020	2236	NM_001184751	79797	ZNF408	zinc finger protein 408		+
ERα_ChIPseq_1485	chr11	46760080	46760517	14444	NR_049846	100847020	MIR5582	microRNA 5582
ERα_ChIPseq_1486	chr11	47006483	47007106	48554	NR_103472	79096	C11orf49	chromosome 11 open reading frame 49
ERα_ChIPseq_1487	chr11	47377625	47378267	-3693	NM_000256	4607	MYBPC3	myosin binding protein C, cardiac
ERα_ChIPseq_1488	chr11	47401012	47401492	-1125	NM_001080547	6688	SPI1	Spi-1 proto-oncogene
ERα_ChIPseq_1489	chr11	47401496	47402144	-1693	NM_001080547	6688	SPI1	Spi-1 proto-oncogene
ERα_ChIPseq_1490	chr11	47447589	47448236	112	NM_002804	5702	PSMC3	proteasome 26S subunit, ATPase 3
ERα_ChIPseq_1491	chr11	60671805	60672204	2057	NM_014502	27339	PRPF19	pre-mRNA processing factor 19	+
ERα_ChIPseq_1492	chr11	60889553	60889922	19807	NM_014207	921	CD5	CD5 molecule
ERα_ChIPseq_1493	chr11	60930595	60931081	-1922	NM_017966	55048	VPS37C	vacuolar protein sorting 37 homolog C (S. cerevisiae)	+
ERα_ChIPseq_1494	chr11	61129694	61130043	-113	NM_153611	220002	CYB561A3	cytochrome b561 family, member A3
ERα_ChIPseq_1495	chr11	61441092	61441614	-6552	NM_006133	747	DAGLA	diacylglycerol lipase, alpha
ERα_ChIPseq_1496	chr11	61441631	61442046	-6067	NM_006133	747	DAGLA	diacylglycerol lipase, alpha
ERα_ChIPseq_1497	chr11	61464465	61465053	16854	NM_006133	747	DAGLA	diacylglycerol lipase, alpha	+
ERα_ChIPseq_1498	chr11	61466500	61467114	18902	NM_006133	747	DAGLA	diacylglycerol lipase, alpha
ERα_ChIPseq_1499	chr11	61813002	61813362	-78050	NM_002032	2495	FTH1	ferritin, heavy polypeptide 1
ERα_ChIPseq_1500	chr11	62165988	62166434	-20296	NM_003357	7356	SCGB1A1	secretoglobin, family 1A, member 1 (uteroglobin)
ERα_ChIPseq_1501	chr11	62313067	62313657	970	NM_024060	79026	AHNAK	AHNAK nucleoprotein
ERα_ChIPseq_1502	chr11	62380342	62380829	-348	NM_001300794	256364	EML3	echinoderm microtubule associated protein like 3	+
ERα_ChIPseq_1503	chr11	62432470	62432996	-45	NM_001286086	102288414	C11orf98	chromosome 11 open reading frame 98	+
ERα_ChIPseq_1504	chr11	62608540	62609471	-1377	NM_018093	54663	WDR74	WD repeat domain 74	+
ERα_ChIPseq_1505	chr11	62699595	62699923	-10747	NM_000738	1128	CHRM1	cholinergic receptor, muscarinic 1
ERα_ChIPseq_1506	chr11	63325860	63326634	4608	NM_017878	54979	HRASLS2	HRAS-like suppressor 2
ERα_ChIPseq_1507	chr11	63358684	63359174	22980	NM_007069	11145	PLA2G16	phospholipase A2, group XVI
ERα_ChIPseq_1508	chr11	63381690	63382141	-6	NM_007069	11145	PLA2G16	phospholipase A2, group XVI	+
ERα_ChIPseq_1509	chr11	63384391	63384910	-2709	NM_001128203	11145	PLA2G16	phospholipase A2, group XVI
ERα_ChIPseq_1510	chr11	63387343	63388021	-5741	NM_001128203	11145	PLA2G16	phospholipase A2, group XVI	+	+
ERα_ChIPseq_1511	chr11	63389662	63390514	-8147	NM_001128203	11145	PLA2G16	phospholipase A2, group XVI	+	+
ERα_ChIPseq_1512	chr11	63398906	63399377	-17200	NM_001128203	11145	PLA2G16	phospholipase A2, group XVI
ERα_ChIPseq_1513	chr11	63639583	63640171	-16110	NM_017490	2011	MARK2	MAP/microtubule affinity-regulating kinase 2
ERα_ChIPseq_1514	chr11	63640299	63640872	-15402	NM_017490	2011	MARK2	MAP/microtubule affinity-regulating kinase 2	+
ERα_ChIPseq_1515	chr11	63641923	63642495	-13778	NM_017490	2011	MARK2	MAP/microtubule affinity-regulating kinase 2
ERα_ChIPseq_1516	chr11	63646990	63647550	-8717	NM_017490	2011	MARK2	MAP/microtubule affinity-regulating kinase 2
ERα_ChIPseq_1517	chr11	63777197	63778079	24313	NM_017670	55611	OTUB1	OTU deubiquitinase, ubiquitin aldehyde binding 1
ERα_ChIPseq_1518	chr11	63778087	63778769	25103	NM_017670	55611	OTUB1	OTU deubiquitinase, ubiquitin aldehyde binding 1
ERα_ChIPseq_1519	chr11	63880728	63881808	9906	NM_013280	23769	FLRT1	fibronectin leucine rich transmembrane protein 1
ERα_ChIPseq_1520	chr11	63953409	63953916	75	NM_001282653	10963	STIP1	stress-induced phosphoprotein 1		+
ERα_ChIPseq_1521	chr11	64344580	64345217	-13384	NM_144585	116085	SLC22A12	solute carrier family 22 (organic anion/urate transporter), member 12		+
ERα_ChIPseq_1522	chr11	64349408	64349842	-8657	NM_144585	116085	SLC22A12	solute carrier family 22 (organic anion/urate transporter), member 12
ERα_ChIPseq_1523	chr11	64361838	64362971	4122	NM_001276327	116085	SLC22A12	solute carrier family 22 (organic anion/urate transporter), member 12
ERα_ChIPseq_1524	chr11	64363366	64363958	5380	NM_001276327	116085	SLC22A12	solute carrier family 22 (organic anion/urate transporter), member 12
ERα_ChIPseq_1525	chr11	64610977	64611373	866	NM_017525	55561	CDC42BPG	CDC42 binding protein kinase gamma (DMPK-like)	+
ERα_ChIPseq_1526	chr11	64644239	64644734	1754	NM_006795	10938	EHD1	EH domain containing 1	+
ERα_ChIPseq_1527	chr11	64901884	64902285	-81	NM_172230	84447	SYVN1	synovial apoptosis inhibitor 1, synoviolin
ERα_ChIPseq_1528	chr11	64931136	64931729	-6275	NM_001008778	387778	SPDYC	speedy/RINGO cell cycle regulator family member C
ERα_ChIPseq_1529	chr11	64983774	64984345	2748	NM_001004326	440044	SLC22A20	solute carrier family 22, member 20
ERα_ChIPseq_1530	chr11	65071612	65072194	-10386	NM_006779	10435	CDC42EP2	CDC42 effector protein (Rho GTPase binding) 2
ERα_ChIPseq_1531	chr11	65146128	65146578	3504	NM_001300820	283130	SLC25A45	solute carrier family 25, member 45
ERα_ChIPseq_1532	chr11	65147201	65147888	2313	NM_001300820	283130	SLC25A45	solute carrier family 25, member 45	+
ERα_ChIPseq_1533	chr11	65185571	65186664	-4152	NR_131012	283131	NEAT1	nuclear paraspeckle assembly transcript 1 (non-protein coding)		+
ERα_ChIPseq_1534	chr11	65188467	65189086	-1493	NR_131012	283131	NEAT1	nuclear paraspeckle assembly transcript 1 (non-protein coding)		+
ERα_ChIPseq_1535	chr11	65189977	65190627	33	NR_028272	283131	NEAT1	nuclear paraspeckle assembly transcript 1 (non-protein coding)	+
ERα_ChIPseq_1536	chr11	65213189	65213611	1471	NR_030343	693197	MIR612	microRNA 612
ERα_ChIPseq_1537	chr11	65222136	65222609	10443	NR_030343	693197	MIR612	microRNA 612		+
ERα_ChIPseq_1538	chr11	65266930	65268391	2427	NR_002819	378938	MALAT1	metastasis associated lung adenocarcinoma transcript 1 (non-protein coding)		+
ERα_ChIPseq_1539	chr11	65308631	65309057	16296	NM_001048218	57410	SCYL1	SCY1-like, kinase-like 1		+
ERα_ChIPseq_1540	chr11	65310106	65310613	15340	NM_001130144	4054	LTBP3	latent transforming growth factor beta binding protein 3
ERα_ChIPseq_1541	chr11	65477090	65477535	-2161	NM_006388	10524	KAT5	K(lysine) acetyltransferase 5	+	+
ERα_ChIPseq_1542	chr11	65554010	65554599	180	NR_031600	100302196	MIR1234	microRNA 1234
ERα_ChIPseq_1543	chr11	65585282	65585700	-15919	NM_152760	254122	SNX32	sorting nexin 32
ERα_ChIPseq_1544	chr11	65779978	65780924	989	NM_001323	1474	CST6	cystatin E/M
ERα_ChIPseq_1545	chr11	65802150	65802525	-8349	NM_053054	117144	CATSPER1	cation channel, sperm associated 1
ERα_ChIPseq_1546	chr11	65891953	65892645	54475	NM_018026	55690	PACS1	phosphofurin acidic cluster sorting protein 1	+
ERα_ChIPseq_1547	chr11	65900649	65901089	63045	NM_018026	55690	PACS1	phosphofurin acidic cluster sorting protein 1
ERα_ChIPseq_1548	chr11	65904717	65905395	67232	NM_018026	55690	PACS1	phosphofurin acidic cluster sorting protein 1
ERα_ChIPseq_1549	chr11	65963311	65963871	-61174	NM_001134775	64837	KLC2	kinesin light chain 2
ERα_ChIPseq_1550	chr11	66090835	66091629	-6717	NM_020404	57124	CD248	CD248 molecule, endosialin
ERα_ChIPseq_1551	chr11	66247693	66248410	-331	NR_120586	101928069	LOC101928069	uncharacterized LOC101928069
ERα_ChIPseq_1552	chr11	66477094	66477758	11444	NM_006946	6712	SPTBN2	spectrin, beta, non-erythrocytic 2	+
ERα_ChIPseq_1553	chr11	66495256	66495727	-6621	NM_006946	6712	SPTBN2	spectrin, beta, non-erythrocytic 2		+
ERα_ChIPseq_1554	chr11	66516398	66516882	4433	NM_024650	79703	C11orf80	chromosome 11 open reading frame 80
ERα_ChIPseq_1555	chr11	66557114	66557675	45187	NM_024650	79703	C11orf80	chromosome 11 open reading frame 80
ERα_ChIPseq_1556	chr11	66789842	66790432	-53	NM_001177880	91683	SYT12	synaptotagmin XII
ERα_ChIPseq_1557	chr11	66794918	66795842	4564	NM_177963	91683	SYT12	synaptotagmin XII
ERα_ChIPseq_1558	chr11	66796207	66796819	5697	NM_177963	91683	SYT12	synaptotagmin XII		+
ERα_ChIPseq_1559	chr11	66798259	66798941	7784	NM_177963	91683	SYT12	synaptotagmin XII
ERα_ChIPseq_1560	chr11	66822474	66823497	-1304	NM_014578	29984	RHOD	ras homolog family member D
ERα_ChIPseq_1561	chr11	66829518	66830371	5655	NM_001300886	29984	RHOD	ras homolog family member D	+
ERα_ChIPseq_1562	chr11	67015938	67016732	8829	NM_001256405	22992	KDM2A	lysine (K)-specific demethylase 2A
ERα_ChIPseq_1563	chr11	67070854	67071317	166	NM_017857	54961	SSH3	slingshot protein phosphatase 3	+
ERα_ChIPseq_1564	chr11	67196146	67196510	393	NM_003952	6199	RPS6KB2	ribosomal protein S6 kinase, 70kDa, polypeptide 2		+
ERα_ChIPseq_1565	chr11	67294588	67295262	-4026	NM_016366	51475	CABP2	calcium binding protein 2
ERα_ChIPseq_1566	chr11	67559172	67559632	13405	NR_024249	645332	FAM86C2P	family with sequence similarity 86, member A pseudogene
ERα_ChIPseq_1567	chr11	67564184	67564525	8453	NR_024249	645332	FAM86C2P	family with sequence similarity 86, member A pseudogene	+
ERα_ChIPseq_1568	chr11	67707680	67708441	63535	NM_030930	81622	UNC93B1	unc-93 homolog B1 (C. elegans)
ERα_ChIPseq_1569	chr11	67780510	67781064	3012	NM_001290058	221	ALDH3B1	aldehyde dehydrogenase 3 family, member B1		+
ERα_ChIPseq_1570	chr11	67784517	67785268	7117	NM_001290058	221	ALDH3B1	aldehyde dehydrogenase 3 family, member B1
ERα_ChIPseq_1571	chr11	67785701	67786287	8219	NM_001290058	221	ALDH3B1	aldehyde dehydrogenase 3 family, member B1	+
ERα_ChIPseq_1572	chr11	67805505	67806181	-619	NM_006019	10312	TCIRG1	T-cell, immune regulator 1, ATPase, H+ transporting, lysosomal V0 subunit A3	+
ERα_ChIPseq_1573	chr11	67984070	67984354	-2973	NM_001300909	51111	KMT5B	lysine (K)-specific methyltransferase 5B	+
ERα_ChIPseq_1574	chr11	68031728	68032458	7376	NM_001300913	53838	C11orf24	chromosome 11 open reading frame 24
ERα_ChIPseq_1575	chr11	68039076	68039788	37	NM_001300913	53838	C11orf24	chromosome 11 open reading frame 24	+
ERα_ChIPseq_1576	chr11	68108647	68109261	28877	NM_002335	4041	LRP5	LDL receptor related protein 5	+
ERα_ChIPseq_1577	chr11	68111369	68111898	31556	NM_002335	4041	LRP5	LDL receptor related protein 5	+
ERα_ChIPseq_1578	chr11	68119919	68120561	40163	NM_002335	4041	LRP5	LDL receptor related protein 5
ERα_ChIPseq_1579	chr11	68147746	68148233	67912	NM_002335	4041	LRP5	LDL receptor related protein 5
ERα_ChIPseq_1580	chr11	68315558	68316000	87593	NM_018312	55291	PPP6R3	protein phosphatase 6, regulatory subunit 3
ERα_ChIPseq_1581	chr11	68530673	68531107	-11902	NM_004923	9633	MTL5	metallothionein-like 5, testis-specific (tesmin)		+
ERα_ChIPseq_1582	chr11	68574444	68575087	34634	NM_001876	1374	CPT1A	carnitine palmitoyltransferase 1A (liver)	+	+
ERα_ChIPseq_1583	chr11	68586842	68587475	22241	NM_001876	1374	CPT1A	carnitine palmitoyltransferase 1A (liver)	+
ERα_ChIPseq_1584	chr11	68713936	68714592	34191	NM_198923	116512	MRGPRD	MAS-related GPR, member D	+
ERα_ChIPseq_1585	chr11	68740604	68741153	7577	NM_198923	116512	MRGPRD	MAS-related GPR, member D		+
ERα_ChIPseq_1586	chr11	68777680	68778356	-1804	NR_120541	101928200	MRGPRF-AS1	MRGPRF antisense RNA 1		+
ERα_ChIPseq_1587	chr11	68783856	68784680	-3418	NM_001098515	116535	MRGPRF	MAS-related GPR, member F
ERα_ChIPseq_1588	chr11	68877697	68878707	27558	NR_036122	100422846	MIR3164	microRNA 3164
ERα_ChIPseq_1589	chr11	68882401	68882871	31992	NR_036122	100422846	MIR3164	microRNA 3164	+	+
ERα_ChIPseq_1590	chr11	68890093	68890914	39859	NR_036122	100422846	MIR3164	microRNA 3164
ERα_ChIPseq_1591	chr11	68981689	68982373	-43001	NR_104161	338694	LOC338694	uncharacterized LOC338694
ERα_ChIPseq_1592	chr11	69010596	69011125	-50745	NM_001300923	26579	MYEOV	myeloma overexpressed
ERα_ChIPseq_1593	chr11	69030266	69031629	-30658	NM_001300923	26579	MYEOV	myeloma overexpressed
ERα_ChIPseq_1594	chr11	69039377	69039935	-21949	NM_001300923	26579	MYEOV	myeloma overexpressed
ERα_ChIPseq_1595	chr11	69042561	69043228	-18711	NM_001300923	26579	MYEOV	myeloma overexpressed
ERα_ChIPseq_1596	chr11	69044570	69045012	-16814	NM_001300923	26579	MYEOV	myeloma overexpressed		+
ERα_ChIPseq_1597	chr11	69046406	69047656	-14574	NM_001300923	26579	MYEOV	myeloma overexpressed
ERα_ChIPseq_1598	chr11	69058800	69059344	-2533	NM_001300923	26579	MYEOV	myeloma overexpressed
ERα_ChIPseq_1599	chr11	69069067	69069824	7840	NM_001300924	26579	MYEOV	myeloma overexpressed	+
ERα_ChIPseq_1600	chr11	69080132	69080644	18783	NM_001300924	26579	MYEOV	myeloma overexpressed		+
ERα_ChIPseq_1601	chr11	69081034	69081898	19861	NM_001300924	26579	MYEOV	myeloma overexpressed
ERα_ChIPseq_1602	chr11	69182882	69183359	-117209	NR_120543	101928292	LINC01488	long intergenic non-protein coding RNA 1488
ERα_ChIPseq_1603	chr11	69251626	69252396	-48318	NR_120543	101928292	LINC01488	long intergenic non-protein coding RNA 1488
ERα_ChIPseq_1604	chr11	69294502	69295228	-5464	NR_120543	101928292	LINC01488	long intergenic non-protein coding RNA 1488
ERα_ChIPseq_1605	chr11	69300141	69300644	63	NR_120545	101928292	LINC01488	long intergenic non-protein coding RNA 1488
ERα_ChIPseq_1606	chr11	69308877	69309528	8873	NR_120545	101928292	LINC01488	long intergenic non-protein coding RNA 1488
ERα_ChIPseq_1607	chr11	69312471	69313718	12765	NR_120545	101928292	LINC01488	long intergenic non-protein coding RNA 1488
ERα_ChIPseq_1608	chr11	69325437	69326016	25397	NR_120545	101928292	LINC01488	long intergenic non-protein coding RNA 1488		+
ERα_ChIPseq_1609	chr11	69329803	69330781	29963	NR_120545	101928292	LINC01488	long intergenic non-protein coding RNA 1488	+
ERα_ChIPseq_1610	chr11	69339289	69339968	39299	NR_120545	101928292	LINC01488	long intergenic non-protein coding RNA 1488
ERα_ChIPseq_1611	chr11	69344798	69345409	44774	NR_120545	101928292	LINC01488	long intergenic non-protein coding RNA 1488	+
ERα_ChIPseq_1612	chr11	69348666	69349296	48652	NR_120545	101928292	LINC01488	long intergenic non-protein coding RNA 1488
ERα_ChIPseq_1613	chr11	69356465	69356920	56363	NR_120545	101928292	LINC01488	long intergenic non-protein coding RNA 1488	+	+
ERα_ChIPseq_1614	chr11	69369637	69370096	69537	NR_120545	101928292	LINC01488	long intergenic non-protein coding RNA 1488
ERα_ChIPseq_1615	chr11	69390908	69391301	-64769	NM_053056	595	CCND1	cyclin D1
ERα_ChIPseq_1616	chr11	69418700	69419242	-36902	NM_053056	595	CCND1	cyclin D1
ERα_ChIPseq_1617	chr11	69453775	69454339	-1816	NM_053056	595	CCND1	cyclin D1
ERα_ChIPseq_1618	chr11	69457508	69457979	1870	NM_053056	595	CCND1	cyclin D1	+
ERα_ChIPseq_1619	chr11	69468656	69470205	13557	NM_053056	595	CCND1	cyclin D1	+
ERα_ChIPseq_1620	chr11	69511836	69512431	6973	NM_005117	9965	FGF19	fibroblast growth factor 19	+
ERα_ChIPseq_1621	chr11	69628102	69628806	5738	NM_005247	2248	FGF3	fibroblast growth factor 3
ERα_ChIPseq_1622	chr11	69629557	69630183	4322	NM_005247	2248	FGF3	fibroblast growth factor 3
ERα_ChIPseq_1623	chr11	69686429	69687603	-52824	NM_005247	2248	FGF3	fibroblast growth factor 3
ERα_ChIPseq_1624	chr11	69705996	69707251	-72431	NM_005247	2248	FGF3	fibroblast growth factor 3	+
ERα_ChIPseq_1625	chr11	69707677	69708346	-73819	NM_005247	2248	FGF3	fibroblast growth factor 3
ERα_ChIPseq_1626	chr11	69791366	69791780	118457	NR_120530	101928443	LOC101928443	uncharacterized LOC101928443
ERα_ChIPseq_1627	chr11	69857934	69858313	51907	NR_120530	101928443	LOC101928443	uncharacterized LOC101928443
ERα_ChIPseq_1628	chr11	69952157	69952924	21024	NR_030691	55107	ANO1	anoctamin 1, calcium activated chloride channel	+
ERα_ChIPseq_1629	chr11	69964490	69965918	33688	NR_030691	55107	ANO1	anoctamin 1, calcium activated chloride channel
ERα_ChIPseq_1630	chr11	70039949	70041432	-8579	NM_003824	8772	FADD	Fas (TNFRSF6)-associated via death domain
ERα_ChIPseq_1631	chr11	70079443	70079955	30430	NM_003824	8772	FADD	Fas (TNFRSF6)-associated via death domain
ERα_ChIPseq_1632	chr11	70105044	70105795	-11387	NR_045286	8500	PPFIA1	protein tyrosine phosphatase, receptor type, f polypeptide (PTPRF), interacting protein (liprin), alpha 1	+
ERα_ChIPseq_1633	chr11	70325659	70326179	81307	NM_138565	2017	CTTN	cortactin	+
ERα_ChIPseq_1634	chr11	70343043	70343589	98704	NM_138565	2017	CTTN	cortactin	+
ERα_ChIPseq_1635	chr11	70532043	70532721	-24437	NR_110766	22941	SHANK2	SH3 and multiple ankyrin repeat domains 2
ERα_ChIPseq_1636	chr11	70539633	70540244	-31993	NR_110766	22941	SHANK2	SH3 and multiple ankyrin repeat domains 2
ERα_ChIPseq_1637	chr11	70587265	70587679	-79527	NR_110766	22941	SHANK2	SH3 and multiple ankyrin repeat domains 2
ERα_ChIPseq_1638	chr11	70606115	70606950	-98587	NR_110766	22941	SHANK2	SH3 and multiple ankyrin repeat domains 2	+
ERα_ChIPseq_1639	chr11	70610096	70611071	-98312	NR_073536	220070	SHANK2-AS3	SHANK2 antisense RNA 3
ERα_ChIPseq_1640	chr11	70622626	70623840	-85662	NR_073536	220070	SHANK2-AS3	SHANK2 antisense RNA 3
ERα_ChIPseq_1641	chr11	70638063	70638864	-70432	NR_073536	220070	SHANK2-AS3	SHANK2 antisense RNA 3
ERα_ChIPseq_1642	chr11	70649315	70649650	-59413	NR_073536	220070	SHANK2-AS3	SHANK2 antisense RNA 3
ERα_ChIPseq_1643	chr11	70651699	70652579	-56756	NR_073536	220070	SHANK2-AS3	SHANK2 antisense RNA 3	+
ERα_ChIPseq_1644	chr11	70657439	70658064	-51144	NR_073536	220070	SHANK2-AS3	SHANK2 antisense RNA 3
ERα_ChIPseq_1645	chr11	70701842	70702814	-6567	NR_073536	220070	SHANK2-AS3	SHANK2 antisense RNA 3
ERα_ChIPseq_1646	chr11	70704960	70705735	-3548	NR_073536	220070	SHANK2-AS3	SHANK2 antisense RNA 3
ERα_ChIPseq_1647	chr11	70720041	70720500	-1797	NR_037437	100500844	MIR3664	microRNA 3664
ERα_ChIPseq_1648	chr11	70792670	70793188	-74456	NR_037437	100500844	MIR3664	microRNA 3664
ERα_ChIPseq_1649	chr11	71073493	71074213	60547	NR_038862	399923	FLJ42102	uncharacterized LOC399923
ERα_ChIPseq_1650	chr11	71091155	71092075	42785	NR_038862	399923	FLJ42102	uncharacterized LOC399923
ERα_ChIPseq_1651	chr11	71125512	71126315	8487	NR_038862	399923	FLJ42102	uncharacterized LOC399923
ERα_ChIPseq_1652	chr11	71150811	71151812	8166	NM_001163817	1717	DHCR7	7-dehydrocholesterol reductase
ERα_ChIPseq_1653	chr11	71159102	71159647	103	NM_001163817	1717	DHCR7	7-dehydrocholesterol reductase	+
ERα_ChIPseq_1654	chr11	71159882	71160384	-656	NM_001360	1717	DHCR7	7-dehydrocholesterol reductase	+
ERα_ChIPseq_1655	chr11	71188499	71189020	4210	NR_106812	102466728	MIR6754	microRNA 6754	+
ERα_ChIPseq_1656	chr11	71191575	71192978	7727	NR_106812	102466728	MIR6754	microRNA 6754	+
ERα_ChIPseq_1657	chr11	71197251	71197874	13013	NR_106812	102466728	MIR6754	microRNA 6754
ERα_ChIPseq_1658	chr11	71211368	71212149	-26555	NM_001012503	440050	KRTAP5-7	keratin associated protein 5-7
ERα_ChIPseq_1659	chr11	71279322	71280060	3082	NM_001012710	387273	KRTAP5-10	keratin associated protein 5-10	+
ERα_ChIPseq_1660	chr11	71365345	71366013	-71758	NM_001005405	440051	KRTAP5-11	keratin associated protein 5-11
ERα_ChIPseq_1661	chr11	71451305	71451628	-47091	NM_018172	55199	FAM86C1	family with sequence similarity 86, member C1
ERα_ChIPseq_1662	chr11	71506712	71507399	8498	NM_152563	55199	FAM86C1	family with sequence similarity 86, member C1	+
ERα_ChIPseq_1663	chr11	71752566	71753053	27472	NR_104178	100128494	LOC100128494	uncharacterized LOC100128494
ERα_ChIPseq_1664	chr11	71802132	71802516	-10585	NM_006185	4926	NUMA1	nuclear mitotic apparatus protein 1	+	+
ERα_ChIPseq_1665	chr11	72323425	72323928	2498	NR_029603	406931	MIR139	microRNA 139
ERα_ChIPseq_1666	chr11	72488801	72489571	-5389	NR_039841	100616410	MIR4692	microRNA 4692
ERα_ChIPseq_1667	chr11	72493358	72494254	-769	NR_039841	100616410	MIR4692	microRNA 4692	+
ERα_ChIPseq_1668	chr11	72496445	72497084	2189	NR_039841	100616410	MIR4692	microRNA 4692
ERα_ChIPseq_1669	chr11	72497196	72497985	3015	NR_039841	100616410	MIR4692	microRNA 4692	+
ERα_ChIPseq_1670	chr11	72903263	72903938	-25743	NM_176072	5029	P2RY2	purinergic receptor P2Y, G-protein coupled, 2
ERα_ChIPseq_1671	chr11	72904415	72905371	-24450	NM_176072	5029	P2RY2	purinergic receptor P2Y, G-protein coupled, 2
ERα_ChIPseq_1672	chr11	72905428	72906705	-23277	NM_176072	5029	P2RY2	purinergic receptor P2Y, G-protein coupled, 2
ERα_ChIPseq_1673	chr11	72908256	72908681	-20875	NM_176072	5029	P2RY2	purinergic receptor P2Y, G-protein coupled, 2
ERα_ChIPseq_1674	chr11	72929024	72929947	-17	NM_176071	5029	P2RY2	purinergic receptor P2Y, G-protein coupled, 2
ERα_ChIPseq_1675	chr11	72938600	72939744	9670	NM_176071	5029	P2RY2	purinergic receptor P2Y, G-protein coupled, 2	+
ERα_ChIPseq_1676	chr11	74128390	74128831	-19100	NM_173582	283209	PGM2L1	phosphoglucomutase 2-like 1
ERα_ChIPseq_1677	chr11	74746916	74747604	47310	NM_006656	10825	NEU3	sialidase 3 (membrane sialidase)		+
ERα_ChIPseq_1678	chr11	75036693	75037235	9266	NR_029891	442900	MIR326	microRNA 326
ERα_ChIPseq_1679	chr11	75044587	75045442	1216	NR_029891	442900	MIR326	microRNA 326	+
ERα_ChIPseq_1680	chr11	75053808	75054447	-7897	NR_029891	442900	MIR326	microRNA 326
[truncated: 8,985 more rows]

## Sheet: HSF1_ChIP-seq peaks
Peak ID	Chr	Start	End	Distance to TSS	Nearest PromoterID	Entrez ID	Gene Name	Gene Description	ERE	HSE
[truncated: 3,715 more rows]

[truncated: 4 more sheets: ERα_ChIA-PET_ChIP-seq common, ERα_ChIA-PET_HSF1 common, ERα_ChIP-seq_HSF1 common, All common peaks]
