# Supplementary material for: Heat shock factor 1 (HSF1) cooperates with estrogen receptor α (ERα) in the regulation of estrogen action in breast cancer cells
Source: eLife. 2021 Nov 16;10:e69843. doi: 10.7554/eLife.69843 (PMC8709578; doi:10.7554/eLife.69843)
Supplement: Supplementary file 5. [file elife-69843-supp5.xlsx]

## Sheet: All comparisons
symbol	ensembl_id	logCPM	HSF1high vs HSF1low logFC	HSF1high vs HSF1low FDR	ER−/HSF1high vs ER−/HSF1low logFC	ER−/HSF1high vs ER−/HSF1low FDR	ER+/HSF1high vs ER+/HSF1low logFC	ER+/HSF1high vs ER+/HSF1low FDR	ER+ vs ER− logFC	ER+ vs ER− FDR	ER+/HSF1low vs ER−/HSF1low logFC	ER+/HSF1low vs ER−/HSF1low FDR	ER+/HSF1high vs ER−/HSF1high logFC	ER+/HSF1high vs ER−/HSF1high FDR	ER+/HSF1low vs ER−/HSF1high logFC	ER+/HSF1low vs ER−/HSF1high FDR	ER+/HSF1high vs ER−/HSF1low logFC	ER+/HSF1high vs ER−/HSF1low FDR	description
TSPAN6	ENSG00000000003	5.91701	-0.102101	0.436079	0.117739	0.562955	-0.321942	0.0782135	-0.640035	8.34103e-08	-0.420194	0.0160191	-0.859875	1.02191e-06	-0.537933	0.000113929	-0.742136	0.000162288	tetraspanin 6 [Source:HGNC Symbol;Acc:HGNC:11858]
TNMD	ENSG00000000005	0.566334	-2.60459	2.21057e-12	-3.09252	2.60034e-10	-2.11665	9.32166e-05	-1.3841	4.5262e-05	-1.87203	5.63882e-05	-0.896167	0.0812946	1.22048	0.00192501	-3.98869	1.43751e-10	tenomodulin [Source:HGNC Symbol;Acc:HGNC:17757]
DPM1	ENSG00000000419	5.44959	0.251696	0.00111773	0.0855538	0.503064	0.417838	0.000145678	-0.363716	1.5294e-06	-0.529858	9.42805e-07	-0.197574	0.0799432	-0.615411	1.01553e-11	-0.11202	0.405469	dolichyl-phosphate mannosyltransferase subunit 1, catalytic [Source:HGNC Symbol;Acc:HGNC:3005]
SCYL3	ENSG00000000457	5.01193	-0.379586	2.78243e-06	-0.391783	0.000870881	-0.367388	0.00202939	0.246091	0.00202194	0.233894	0.052961	0.258289	0.0249492	0.625677	4.15348e-11	-0.133495	0.340298	SCY1 like pseudokinase 3 [Source:HGNC Symbol;Acc:HGNC:19285]
C1orf112	ENSG00000000460	4.05931	-0.229992	0.0192714	-0.160645	0.295291	-0.29934	0.0390191	-0.853304	7.1805e-18	-0.783957	7.32943e-09	-0.922652	9.35676e-11	-0.623312	3.04922e-08	-1.0833	1.69461e-11	chromosome 1 open reading frame 112 [Source:HGNC Symbol;Acc:HGNC:25565]
FGR	ENSG00000000938	3.38092	-0.14054	0.330561	0.120724	0.599071	-0.401804	0.0488615	-0.262252	0.0531142	-0.000988354	0.996602	-0.523516	0.00775535	-0.121712	0.456185	-0.402792	0.0739771	FGR proto-oncogene, Src family tyrosine kinase [Source:HGNC Symbol;Acc:HGNC:3697]
CFH	ENSG00000000971	5.61867	-0.702503	4.1389e-08	-0.699746	0.000128821	-0.705259	0.000183162	-0.0582555	0.672146	-0.055499	0.799658	-0.0610121	0.766787	0.644247	1.10448e-05	-0.760758	0.0002272	complement factor H [Source:HGNC Symbol;Acc:HGNC:4883]
FUCA2	ENSG00000001036	6.16569	0.0627883	0.533274	-0.179149	0.208707	0.304726	0.0222605	-0.283634	0.00164142	-0.525572	4.3859e-05	-0.0416961	0.779666	-0.346422	0.00100457	-0.220846	0.151681	alpha-L-fucosidase 2 [Source:HGNC Symbol;Acc:HGNC:4008]
GCLC	ENSG00000001084	5.5558	-0.188115	0.0788008	0.00819115	0.96833	-0.384422	0.0129308	0.153482	0.14623	0.349788	0.0237086	-0.0428245	0.801688	0.341597	0.00444516	-0.0346333	0.862227	glutamate-cysteine ligase catalytic subunit [Source:HGNC Symbol;Acc:HGNC:4311]
NFYA	ENSG00000001167	6.11212	0.0752901	0.468316	0.192435	0.200155	-0.0418546	0.796769	-0.628612	3.53472e-11	-0.511468	0.00014075	-0.745757	6.64545e-08	-0.703902	2.73035e-10	-0.553322	0.000352162	nuclear transcription factor Y subunit alpha [Source:HGNC Symbol;Acc:HGNC:7804]
STPG1	ENSG00000001460	3.63072	0.124906	0.123932	0.129172	0.303505	0.12064	0.320093	-0.190499	0.0142539	-0.186233	0.112244	-0.194765	0.0905894	-0.315405	0.000470822	-0.0655928	0.645039	sperm tail PG-rich repeat containing 1 [Source:HGNC Symbol;Acc:HGNC:28070]
NIPAL3	ENSG00000001461	5.6951	0.0336675	0.786616	0.0769177	0.68046	-0.00958274	0.960617	0.0163441	0.89478	0.0595943	0.74788	-0.0269061	0.882521	-0.0173233	0.900337	0.0500116	0.806829	NIPA like domain containing 3 [Source:HGNC Symbol;Acc:HGNC:25233]
LAS1L	ENSG00000001497	5.9783	0.334933	6.15302e-07	0.227865	0.0245486	0.442002	3.96184e-06	-0.254018	0.000111098	-0.361087	0.00013838	-0.14695	0.137665	-0.588952	1.00664e-13	0.0809151	0.495489	LAS1 like ribosome biogenesis factor [Source:HGNC Symbol;Acc:HGNC:25726]
ENPP4	ENSG00000001561	4.88566	-0.446588	0.000409494	0.111248	0.603415	-1.00442	1.49722e-07	0.745162	2.7325e-09	1.303	1.16951e-11	0.187327	0.322722	1.19175	3.7877e-15	0.298575	0.160771	ectonucleotide pyrophosphatase/phosphodiesterase 4 [Source:HGNC Symbol;Acc:HGNC:3359]
SEMA3F	ENSG00000001617	6.58809	0.165695	0.162906	-0.391317	0.0203676	0.722707	8.07776e-06	1.20971	1.02926e-23	0.652694	9.58183e-05	1.76672	1.72578e-26	1.04401	1.80262e-14	1.3754	7.61299e-13	semaphorin 3F [Source:HGNC Symbol;Acc:HGNC:10728]
CFTR	ENSG00000001626	0.979813	-1.03127	0.00251706	-1.09936	0.0238369	-0.96318	0.0660338	-2.86385	5.85824e-15	-2.93194	3.74029e-10	-2.79575	2.47738e-07	-1.83257	3.80472e-06	-3.89512	2.27132e-10	CF transmembrane conductance regulator [Source:HGNC Symbol;Acc:HGNC:1884]
ANKIB1	ENSG00000001629	6.40631	-0.32943	2.29206e-05	-0.496185	1.02157e-05	-0.162675	0.170294	-0.128091	0.10233	-0.294846	0.00847467	0.0386646	0.758254	0.201339	0.0254622	-0.457521	0.000287962	ankyrin repeat and IBR domain containing 1 [Source:HGNC Symbol;Acc:HGNC:22215]
CYP51A1	ENSG00000001630	2.33053	-0.278979	0.0389641	-0.495124	0.0109292	-0.062834	0.780665	0.164686	0.224532	-0.0514589	0.822605	0.380831	0.0440419	0.443665	0.00372823	-0.114293	0.634326	cytochrome P450 family 51 subfamily A member 1 [Source:HGNC Symbol;Acc:HGNC:2649]
KRIT1	ENSG00000001631	5.25586	-0.253791	0.00022351	-0.365949	0.000249735	-0.141632	0.176824	-0.0344144	0.64297	-0.146573	0.158394	0.0777443	0.46097	0.219376	0.00563602	-0.288205	0.0102889	KRIT1 ankyrin repeat containing [Source:HGNC Symbol;Acc:HGNC:1573]
RAD52	ENSG00000002016	3.1952	-0.0421903	0.67819	0.0923332	0.542778	-0.176714	0.203494	-0.0723417	0.44611	0.0621818	0.683197	-0.206865	0.122071	-0.0301514	0.790023	-0.114532	0.473993	RAD52 homolog, DNA repair protein [Source:HGNC Symbol;Acc:HGNC:9824]
MYH16	ENSG00000002079	-0.518471	-0.0521722	0.84815	0.214837	0.588063	-0.319181	0.395727	-1.30179	3.09e-08	-1.03478	0.00171767	-1.5688	8.57686e-06	-1.24962	5.02398e-06	-1.35396	0.000455751	myosin heavy chain 16 pseudogene [Source:HGNC Symbol;Acc:HGNC:31038]
BAD	ENSG00000002330	5.0793	0.721174	1.50455e-09	0.721205	4.85228e-05	0.721143	1.52884e-05	0.308686	0.00791491	0.308717	0.0818803	0.308655	0.0673436	-0.412488	0.00230555	1.02986	9.62467e-08	BCL2 associated agonist of cell death [Source:HGNC Symbol;Acc:HGNC:936]
LAP3	ENSG00000002549	7.13408	0.172828	0.0973226	0.319992	0.0379198	0.0256652	0.883801	-0.238749	0.0172921	-0.0915854	0.580387	-0.385912	0.00819786	-0.411577	0.00040269	-0.0659202	0.723879	leucine aminopeptidase 3 [Source:HGNC Symbol;Acc:HGNC:18449]
CD99	ENSG00000002586	7.65208	0.0421715	0.744498	0.0748831	0.703328	0.00945984	0.96275	-0.428241	0.000124243	-0.395529	0.0157812	-0.460952	0.00498287	-0.470412	0.000321153	-0.386069	0.0395988	CD99 molecule (Xg blood group) [Source:HGNC Symbol;Acc:HGNC:7082]
HS3ST1	ENSG00000002587	2.72278	-0.2081	0.108645	-0.0220112	0.926008	-0.39419	0.0363047	-0.793992	2.11416e-10	-0.607903	0.000597905	-0.980081	9.59279e-08	-0.585892	5.14432e-05	-1.00209	1.03258e-06	heparan sulfate-glucosamine 3-sulfotransferase 1 [Source:HGNC Symbol;Acc:HGNC:5194]
AOC1	ENSG00000002726	2.32162	0.376421	0.274452	-2.09203	6.15196e-06	2.84488	1.16968e-09	-0.251575	0.461158	-2.72003	2.05814e-09	2.21688	6.18977e-07	-0.627996	0.100625	0.124846	0.839399	amine oxidase copper containing 1 [Source:HGNC Symbol;Acc:HGNC:80]
WNT16	ENSG00000002745	-2.31202	-0.000107608	0.996426	0.401356	0.318521	-0.401571	0.313649	-0.68426	0.00602736	-0.282796	0.478013	-1.08572	0.00350516	-0.684152	0.0176311	-0.684367	0.106351	Wnt family member 16 [Source:HGNC Symbol;Acc:HGNC:16267]
HECW1	ENSG00000002746	-0.00547947	-0.799886	0.000186751	-0.657422	0.0360097	-0.94235	0.00343769	-0.991899	2.52117e-06	-0.849435	0.00465945	-1.13436	0.000313439	-0.192013	0.45325	-1.79178	4.36155e-07	HECT, C2 and WW domain containing E3 ubiquitin protein ligase 1 [Source:HGNC Symbol;Acc:HGNC:22195]
MAD1L1	ENSG00000002822	4.88619	0.65877	2.43759e-13	0.607685	3.63923e-06	0.709855	1.39304e-08	-0.163416	0.0619989	-0.214501	0.0994245	-0.112331	0.400139	-0.822186	2.9583e-15	0.495354	0.00048362	mitotic arrest deficient 1 like 1 [Source:HGNC Symbol;Acc:HGNC:6762]
LASP1	ENSG00000002834	8.56978	-0.334492	0.00247508	-0.829755	1.50954e-07	0.16077	0.346351	0.486776	6.81537e-06	-0.00848621	0.96589	0.982039	1.04993e-10	0.821269	1.95675e-10	0.152284	0.430251	LIM and SH3 protein 1 [Source:HGNC Symbol;Acc:HGNC:6513]
SNX11	ENSG00000002919	4.90421	0.0469345	0.624227	-0.327533	0.00980373	0.421402	0.000616509	0.155176	0.0726217	-0.219292	0.0860873	0.529644	8.72271e-06	0.108242	0.290444	0.202111	0.164152	sorting nexin 11 [Source:HGNC Symbol;Acc:HGNC:14975]
TMEM176A	ENSG00000002933	5.54571	0.34479	0.0595154	0.426382	0.127064	0.263199	0.340209	-0.157622	0.397083	-0.0760307	0.805049	-0.239214	0.382307	-0.502412	0.0150631	0.187168	0.558398	transmembrane protein 176A [Source:HGNC Symbol;Acc:HGNC:24930]
M6PR	ENSG00000003056	6.33436	-0.291411	0.00244262	-0.286174	0.0457397	-0.296648	0.0381823	-0.29458	0.00178372	-0.289343	0.0385252	-0.299817	0.0311914	-0.00316933	0.979146	-0.585991	0.000162936	mannose-6-phosphate receptor, cation dependent [Source:HGNC Symbol;Acc:HGNC:6752]
KLHL13	ENSG00000003096	3.35148	-0.0139059	0.95862	0.203639	0.594057	-0.231451	0.526471	-0.681046	0.00220425	-0.4635	0.169511	-0.898591	0.00673309	-0.66714	0.0104005	-0.694952	0.0635651	kelch like family member 13 [Source:HGNC Symbol;Acc:HGNC:22931]
CYP26B1	ENSG00000003137	2.93122	0.0504874	0.817927	0.111293	0.736826	-0.0103181	0.976051	-1.40549	3.33954e-13	-1.34469	2.82036e-07	-1.4663	2.35873e-07	-1.45598	9.58352e-11	-1.355	1.33333e-05	cytochrome P450 family 26 subfamily B member 1 [Source:HGNC Symbol;Acc:HGNC:20581]
ICA1	ENSG00000003147	5.76224	-0.174923	0.125043	-0.302617	0.0680194	-0.047228	0.801336	0.47801	1.01361e-05	0.350315	0.0328985	0.605704	7.01546e-05	0.652932	3.15336e-07	0.303087	0.0998649	islet cell autoantigen 1 [Source:HGNC Symbol;Acc:HGNC:5343]
DBNDD1	ENSG00000003249	5.84646	0.857073	1.9387e-08	0.570002	0.0128785	1.14414	7.93784e-08	-0.608856	3.82444e-05	-0.895927	1.87337e-05	-0.321785	0.150924	-1.46593	8.20697e-16	0.248217	0.340202	dysbindin domain containing 1 [Source:HGNC Symbol;Acc:HGNC:28455]
ALS2	ENSG00000003393	4.9971	-0.320362	5.04391e-06	-0.464672	4.69275e-06	-0.176052	0.0959308	-0.0911006	0.203419	-0.23541	0.0209458	0.0532093	0.631262	0.229261	0.00458448	-0.411462	0.00029862	alsin Rho guanine nucleotide exchange factor ALS2 [Source:HGNC Symbol;Acc:HGNC:443]
CASP10	ENSG00000003400	3.6456	-0.671926	2.37997e-07	-0.732306	8.07297e-05	-0.611546	0.00142932	-0.555569	1.20003e-05	-0.615948	0.000722548	-0.495189	0.0082116	0.116357	0.455096	-1.22749	8.64869e-09	caspase 10 [Source:HGNC Symbol;Acc:HGNC:1500]
CFLAR	ENSG00000003402	6.72978	-0.351831	1.74991e-06	-0.121633	0.296642	-0.58203	1.03872e-07	-0.476414	6.56885e-11	-0.246215	0.0211105	-0.706612	4.04132e-11	-0.124582	0.148982	-0.828245	9.60536e-12	CASP8 and FADD like apoptosis regulator [Source:HGNC Symbol;Acc:HGNC:1876]
TFPI	ENSG00000003436	4.51496	-0.0101154	0.959717	-0.179406	0.517546	0.159175	0.556811	-0.0995996	0.57983	-0.26889	0.29967	0.0696911	0.799409	-0.0894843	0.665789	-0.109715	0.723879	tissue factor pathway inhibitor [Source:HGNC Symbol;Acc:HGNC:11760]
NDUFAF7	ENSG00000003509	3.78062	0.0928175	0.103989	0.0938437	0.287143	0.0917913	0.280613	-0.358049	6.53933e-11	-0.357023	4.63106e-06	-0.359076	5.05264e-06	-0.450867	3.70746e-12	-0.265232	0.00319362	NADH:ubiquinone oxidoreductase complex assembly factor 7 [Source:HGNC Symbol;Acc:HGNC:28816]
RBM5	ENSG00000003756	6.3461	-0.148523	0.0158962	-0.107138	0.264253	-0.189908	0.0359487	0.541296	2.73205e-18	0.582681	7.08858e-11	0.499911	3.43297e-09	0.68982	1.2839e-20	0.392773	6.88664e-05	RNA binding motif protein 5 [Source:HGNC Symbol;Acc:HGNC:9902]
MTMR7	ENSG00000003987	1.41781	-0.289352	0.123405	-0.343361	0.222946	-0.235343	0.414755	-0.0493907	0.806239	-0.1034	0.736637	0.00461843	0.988125	0.239961	0.265038	-0.338742	0.27577	myotubularin related protein 7 [Source:HGNC Symbol;Acc:HGNC:7454]
SLC7A2	ENSG00000003989	7.50688	-1.37989	1.743e-07	-2.24261	1.26333e-09	-0.517164	0.195905	3.70397	3.48246e-31	2.84125	2.94527e-11	4.56669	9.89892e-30	5.08386	4.03659e-37	2.32408	1.28591e-07	solute carrier family 7 member 2 [Source:HGNC Symbol;Acc:HGNC:11060]
ARF5	ENSG00000004059	7.35428	0.552392	9.01774e-09	0.481282	0.000732517	0.623502	4.12668e-06	-0.28357	0.00247148	-0.35468	0.0095219	-0.21246	0.131034	-0.835962	1.1971e-13	0.268821	0.0902874	ADP ribosylation factor 5 [Source:HGNC Symbol;Acc:HGNC:658]
SARM1	ENSG00000004139	2.70765	0.00861384	0.960509	-0.344739	0.12136	0.361967	0.0939806	0.974937	2.96326e-11	0.621584	0.00413236	1.32829	4.09714e-11	0.966323	1.51761e-08	0.983551	3.78699e-05	sterile alpha and TIR motif containing 1 [Source:HGNC Symbol;Acc:HGNC:17074]
POLDIP2	ENSG00000004142	7.10006	0.259567	0.00372137	-0.0987644	0.499986	0.617898	1.09741e-06	-0.0226587	0.819198	-0.38099	0.00268856	0.335672	0.00737136	-0.282225	0.00591067	0.236908	0.111552	DNA polymerase delta interacting protein 2 [Source:HGNC Symbol;Acc:HGNC:23781]
PLXND1	ENSG00000004399	7.37054	0.198425	0.05812	0.041935	0.81989	0.354915	0.0168329	0.153016	0.14015	-0.00347382	0.985627	0.309506	0.0337954	-0.0454088	0.720586	0.351441	0.0376006	plexin D1 [Source:HGNC Symbol;Acc:HGNC:9107]
AK2	ENSG00000004455	7.19162	0.394577	1.47082e-09	0.485881	4.72282e-07	0.303273	0.00106202	-0.549201	4.67896e-17	-0.457897	4.44882e-07	-0.640505	8.82077e-12	-0.943778	1.58433e-30	-0.154624	0.154835	adenylate kinase 2 [Source:HGNC Symbol;Acc:HGNC:362]
CD38	ENSG00000004468	3.11545	0.0290858	0.91472	0.21164	0.584043	-0.153468	0.689113	-1.49974	9.52839e-11	-1.31718	3.06025e-05	-1.68229	1.13196e-06	-1.52882	1.43268e-08	-1.47065	9.32123e-05	CD38 molecule [Source:HGNC Symbol;Acc:HGNC:1667]
FKBP4	ENSG00000004478	8.60964	0.455134	1.69396e-05	0.202712	0.225208	0.707557	2.45487e-06	0.461422	8.75447e-06	0.208999	0.199168	0.713844	9.3232e-07	0.00628731	0.962652	0.916556	1.19213e-07	FKBP prolyl isomerase 4 [Source:HGNC Symbol;Acc:HGNC:3720]
KDM1A	ENSG00000004487	7.00625	0.189766	0.00553029	0.154495	0.143361	0.225037	0.0232824	-0.624458	2.60617e-19	-0.659729	5.95876e-12	-0.589187	1.81548e-09	-0.814224	1.63225e-22	-0.434692	7.81502e-05	lysine demethylase 1A [Source:HGNC Symbol;Acc:HGNC:29079]
RBM6	ENSG00000004534	6.17994	0.00984578	0.903315	-0.0606191	0.595971	0.0803107	0.45435	0.211097	0.00157579	0.140632	0.175808	0.281561	0.00315884	0.201251	0.010174	0.220942	0.0490761	RNA binding motif protein 6 [Source:HGNC Symbol;Acc:HGNC:9903]
CAMKK1	ENSG00000004660	3.74002	0.0628697	0.619139	0.137784	0.461645	-0.012045	0.952307	0.0167495	0.897338	0.0916642	0.627584	-0.0581653	0.752042	-0.0461202	0.744243	0.0796192	0.702869	calcium/calmodulin dependent protein kinase kinase 1 [Source:HGNC Symbol;Acc:HGNC:1469]
RECQL	ENSG00000004700	4.97163	-0.57855	2.08784e-07	-0.534126	0.00087741	-0.622975	0.000146643	-0.538043	7.97632e-07	-0.493619	0.00170521	-0.582468	0.000263402	0.040507	0.769398	-1.11659	1.0648e-09	RecQ like helicase [Source:HGNC Symbol;Acc:HGNC:9948]
VPS50	ENSG00000004766	5.0555	-0.454419	9.72345e-09	-0.50715	7.84304e-06	-0.401688	0.000499475	0.14635	0.0632209	0.0936198	0.458098	0.199081	0.0794948	0.600769	6.52604e-11	-0.308068	0.0167758	VPS50 subunit of EARP/GARPII complex [Source:HGNC Symbol;Acc:HGNC:25956]
HSPB6	ENSG00000004776	3.39528	-0.430408	0.0870947	-0.110585	0.796849	-0.750231	0.0440275	0.272717	0.277615	0.59254	0.115021	-0.0471063	0.908451	0.703125	0.0130273	-0.157691	0.726492	heat shock protein family B (small) member 6 [Source:HGNC Symbol;Acc:HGNC:26511]
ARHGAP33	ENSG00000004777	3.92705	0.83269	2.77187e-10	0.836054	2.04876e-05	0.829326	6.03411e-06	0.262389	0.0422918	0.265753	0.182114	0.259024	0.17169	-0.570301	0.000128691	1.09508	2.53751e-07	Rho GTPase activating protein 33 [Source:HGNC Symbol;Acc:HGNC:23085]
NDUFAB1	ENSG00000004779	5.93278	0.355827	3.8997e-05	0.144668	0.295557	0.566987	4.21171e-06	-0.101098	0.254257	-0.312257	0.0122695	0.110062	0.401379	-0.456925	4.54298e-06	0.25473	0.0766853	NADH:ubiquinone oxidoreductase subunit AB1 [Source:HGNC Symbol;Acc:HGNC:7694]
PDK4	ENSG00000004799	5.49747	-0.947297	1.88549e-06	-1.00642	0.000363257	-0.88817	0.00272658	1.2853	1.04377e-10	1.22617	3.50172e-05	1.34442	5.75931e-07	2.23259	2.39276e-19	0.337999	0.320223	pyruvate dehydrogenase kinase 4 [Source:HGNC Symbol;Acc:HGNC:8812]
SLC22A16	ENSG00000004809	-0.693789	1.81529	1.54302e-11	2.2974	2.75149e-08	1.33318	0.000240046	-1.89638	6.61121e-13	-1.41427	7.32175e-05	-2.37849	2.45956e-09	-3.71167	2.4453e-26	-0.0810886	0.868272	solute carrier family 22 member 16 [Source:HGNC Symbol;Acc:HGNC:20302]
ZMYND10	ENSG00000004838	3.41411	-0.133228	0.489809	-0.421306	0.116859	0.15485	0.58812	2.82637	1.79069e-39	2.53829	5.71766e-18	3.11445	1.54388e-31	2.9596	7.45171e-34	2.69314	1.69817e-17	zinc finger MYND-type containing 10 [Source:HGNC Symbol;Acc:HGNC:19412]
ABCB5	ENSG00000004846	-0.925166	-0.926517	0.00168435	-0.625582	0.159742	-1.22745	0.00597207	0.686442	0.0184735	0.987377	0.0257954	0.385506	0.382322	1.61296	2.66603e-06	-0.240075	0.650799	ATP binding cassette subfamily B member 5 [Source:HGNC Symbol;Acc:HGNC:46]
ARX	ENSG00000004848	-0.0400786	0.0378447	0.933371	-0.911728	0.10469	0.987418	0.0699907	0.4796	0.211387	-0.469973	0.423637	1.42917	0.00581525	0.441755	0.325235	0.517445	0.431737	aristaless related homeobox [Source:HGNC Symbol;Acc:HGNC:18060]
SLC25A13	ENSG00000004864	5.14981	-0.00187616	0.984632	-0.283798	0.0166862	0.280045	0.0161616	-0.834657	1.78752e-23	-1.11658	6.77898e-22	-0.552736	1.48787e-06	-0.832781	6.30476e-18	-0.836534	2.2895e-10	solute carrier family 25 member 13 [Source:HGNC Symbol;Acc:HGNC:10983]
ST7	ENSG00000004866	5.12581	-0.373566	9.33025e-06	-0.61429	4.18681e-07	-0.132842	0.311224	-0.29781	0.000316058	-0.538534	5.11645e-06	-0.0570857	0.670627	0.0757558	0.455855	-0.671376	9.39136e-07	suppression of tumorigenicity 7 [Source:HGNC Symbol;Acc:HGNC:11351]
CDC27	ENSG00000004897	6.27715	-0.154211	0.0238015	-0.171878	0.0928793	-0.136545	0.183484	0.0360509	0.618028	0.0183843	0.876751	0.0537175	0.611858	0.190262	0.0143206	-0.11816	0.307578	cell division cycle 27 [Source:HGNC Symbol;Acc:HGNC:1728]
CALCR	ENSG00000004948	-0.887001	-0.184988	0.467893	-0.856122	0.0144028	0.486145	0.166467	1.91585	1.07671e-14	1.24472	0.000517582	2.58698	7.13442e-15	2.10084	5.19997e-13	1.73086	1.0832e-05	calcitonin receptor [Source:HGNC Symbol;Acc:HGNC:1440]
HCCS	ENSG00000004961	4.73843	0.129582	0.0781636	0.00641191	0.963456	0.252752	0.015217	-0.565648	4.26249e-15	-0.688818	8.90827e-12	-0.442479	1.50633e-05	-0.69523	4.29853e-16	-0.436067	0.000171203	holocytochrome c synthase [Source:HGNC Symbol;Acc:HGNC:4837]
DVL2	ENSG00000004975	5.05199	0.210661	0.00299096	0.298315	0.00479378	0.123007	0.254885	-0.267499	0.000113385	-0.179845	0.0866338	-0.355152	0.000429271	-0.47816	5.54448e-09	-0.0568377	0.658615	dishevelled segment polarity protein 2 [Source:HGNC Symbol;Acc:HGNC:3086]
PRSS22	ENSG00000005001	3.9406	0.40623	0.0134128	0.289182	0.264601	0.523278	0.0260998	-0.160266	0.339802	-0.277314	0.264549	-0.0432181	0.873434	-0.566496	0.0024652	0.245964	0.384003	serine protease 22 [Source:HGNC Symbol;Acc:HGNC:14368]
UPF1	ENSG00000005007	7.2013	0.226024	0.000688777	0.0447797	0.696738	0.407268	1.84753e-05	-0.120159	0.0718392	-0.301403	0.00149588	0.0610853	0.556028	-0.346183	6.2283e-06	0.105865	0.359106	UPF1 RNA helicase and ATPase [Source:HGNC Symbol;Acc:HGNC:9962]
SKAP2	ENSG00000005020	5.02844	-0.568975	7.06036e-07	-0.56672	0.0006036	-0.57123	0.000726603	-0.418822	0.000189077	-0.416567	0.0111361	-0.421077	0.0109195	0.150152	0.268054	-0.987797	1.27916e-07	src kinase associated phosphoprotein 2 [Source:HGNC Symbol;Acc:HGNC:15687]
SLC25A5	ENSG00000005022	8.24065	0.0717469	0.506636	-0.132963	0.404875	0.276457	0.0570388	-0.724801	2.37304e-13	-0.929511	1.78207e-11	-0.520091	0.000240858	-0.796548	6.75838e-12	-0.653055	4.49039e-05	solute carrier family 25 member 5 [Source:HGNC Symbol;Acc:HGNC:10991]
MCUB	ENSG00000005059	4.68387	-0.0476162	0.667171	0.140002	0.384275	-0.235234	0.116786	-0.461767	2.02528e-06	-0.274149	0.0594923	-0.649385	5.17807e-06	-0.414151	0.00027413	-0.509383	0.0015465	mitochondrial calcium uniporter dominant negative subunit beta [Source:HGNC Symbol;Acc:HGNC:26076]
HOXA11	ENSG00000005073	0.767601	-0.256744	0.358014	0.0885983	0.85078	-0.602087	0.136789	-2.13657	8.24135e-15	-1.79123	6.24076e-07	-2.48191	2.2294e-09	-1.87982	1.69144e-09	-2.39331	7.75217e-08	homeobox A11 [Source:HGNC Symbol;Acc:HGNC:5101]
POLR2J	ENSG00000005075	5.29667	0.744023	6.70503e-11	0.662688	8.24069e-05	0.825357	2.01843e-07	-0.17737	0.115611	-0.258705	0.121173	-0.096036	0.585231	-0.921393	2.80757e-12	0.566652	0.00184767	RNA polymerase II subunit J [Source:HGNC Symbol;Acc:HGNC:9197]
DHX33	ENSG00000005100	4.98436	-5.51431e-05	0.999472	0.194086	0.0806065	-0.194196	0.0738838	-0.438676	8.73323e-10	-0.244535	0.0199336	-0.632817	1.44401e-09	-0.438621	1.58412e-07	-0.438731	0.000183339	DEAH-box helicase 33 [Source:HGNC Symbol;Acc:HGNC:16718]
MEOX1	ENSG00000005102	2.38701	-0.366181	0.130194	-0.404552	0.267563	-0.32781	0.375729	0.505697	0.0300511	0.467326	0.198358	0.544068	0.105227	0.871879	0.00126225	0.139516	0.747316	mesenchyme homeobox 1 [Source:HGNC Symbol;Acc:HGNC:7013]
THSD7A	ENSG00000005108	2.60675	-0.686162	2.02971e-05	-0.798407	0.000543952	-0.573918	0.0169684	0.48042	0.00241995	0.368176	0.133852	0.592664	0.00833881	1.16658	6.67732e-10	-0.205742	0.466736	thrombospondin type 1 domain containing 7A [Source:HGNC Symbol;Acc:HGNC:22207]
LIG3	ENSG00000005156	5.73027	0.068446	0.465408	-0.0658887	0.654588	0.202781	0.114822	0.131824	0.130554	-0.00251034	0.98772	0.266159	0.0302193	0.0633783	0.545188	0.20027	0.168638	DNA ligase 3 [Source:HGNC Symbol;Acc:HGNC:6600]
RPAP3	ENSG00000005175	5.22841	-0.123852	0.057039	-0.261768	0.00512688	0.0140634	0.898827	0.0841594	0.194851	-0.0537564	0.608229	0.222075	0.0138992	0.208012	0.0045627	-0.0396931	0.736175	RNA polymerase II associated protein 3 [Source:HGNC Symbol;Acc:HGNC:26151]
ACSM3	ENSG00000005187	2.61603	-0.861048	2.35332e-06	-1.29086	5.39391e-07	-0.431231	0.119151	-1.48049	1.935e-15	-1.9103	4.85487e-14	-1.05067	7.74588e-05	-0.619441	0.00302351	-2.34154	8.65074e-14	acyl-CoA synthetase medium chain family member 3 [Source:HGNC Symbol;Acc:HGNC:10522]
REXO5	ENSG00000005189	3.26511	0.132647	0.242163	-0.166312	0.332856	0.431606	0.00537562	0.00827787	0.947542	-0.290681	0.0671787	0.307237	0.0463346	-0.124369	0.333793	0.140925	0.457664	RNA exonuclease 5 [Source:HGNC Symbol;Acc:HGNC:24661]
CIAPIN1	ENSG00000005194	5.57339	0.247146	0.000934502	0.115338	0.336316	0.378953	0.000376305	-0.541061	3.86288e-13	-0.672869	1.35217e-10	-0.409254	0.000121184	-0.788207	1.93712e-18	-0.293916	0.0161228	cytokine induced apoptosis inhibitor 1 [Source:HGNC Symbol;Acc:HGNC:28050]
SPPL2B	ENSG00000005206	5.43802	0.836661	1.56546e-16	0.801999	4.58247e-08	0.871323	3.50104e-10	0.365794	0.00011747	0.331132	0.0208479	0.400457	0.00310257	-0.470867	2.34867e-05	1.20246	1.30948e-13	signal peptide peptidase like 2B [Source:HGNC Symbol;Acc:HGNC:30627]
FAM214B	ENSG00000005238	4.63625	-0.0442634	0.654643	-0.131148	0.355129	0.0426211	0.776172	-0.285042	0.00106381	-0.371927	0.00327876	-0.198158	0.130148	-0.240779	0.0186607	-0.329306	0.0235412	family with sequence similarity 214 member B [Source:HGNC Symbol;Acc:HGNC:25666]
COPZ2	ENSG00000005243	4.07947	-0.0773054	0.661231	0.271509	0.282902	-0.426119	0.0743577	0.242415	0.128749	0.591229	0.0118927	-0.106399	0.67269	0.319721	0.0825351	0.16511	0.558645	COPI coat complex subunit zeta 2 [Source:HGNC Symbol;Acc:HGNC:19356]
PRKAR2B	ENSG00000005249	5.67948	-0.638942	9.9308e-05	-0.68959	0.00366871	-0.588295	0.0165282	0.280132	0.0891293	0.229485	0.377725	0.33078	0.166754	0.919074	1.33834e-06	-0.35881	0.195484	protein kinase cAMP-dependent type II regulatory subunit beta [Source:HGNC Symbol;Acc:HGNC:9392]
MSL3	ENSG00000005302	5.20838	-0.0201439	0.767931	0.0954484	0.318417	-0.135736	0.133185	-0.935139	6.4208e-43	-0.819547	3.43077e-21	-1.05073	7.17834e-29	-0.914995	8.70768e-33	-0.955283	1.02911e-20	MSL complex subunit 3 [Source:HGNC Symbol;Acc:HGNC:7370]
CREBBP	ENSG00000005339	7.095	-0.292055	0.000142339	-0.341321	0.00234219	-0.242789	0.0337533	0.25893	0.000603567	0.209664	0.06849	0.308196	0.004325	0.550985	7.53523e-10	-0.0331255	0.81966	CREB binding protein [Source:HGNC Symbol;Acc:HGNC:2348]
TSPOAP1	ENSG00000005379	4.47254	0.955625	3.79843e-09	1.26937	2.67239e-07	0.641884	0.00474879	0.8756	3.00256e-08	1.18934	6.28255e-07	0.561859	0.0118664	-0.0800251	0.683315	1.83122	1.21812e-11	TSPO associated protein 1 [Source:HGNC Symbol;Acc:HGNC:16831]
MPO	ENSG00000005381	-1.37549	0.341373	0.129533	0.770128	0.0201078	-0.087383	0.815025	-1.03607	1.37711e-06	-0.607317	0.0533089	-1.46483	5.83341e-06	-1.37745	5.38611e-08	-0.6947	0.0536592	myeloperoxidase [Source:HGNC Symbol;Acc:HGNC:7218]
PON1	ENSG00000005421	-0.961181	-1.2026	5.83847e-05	-1.15463	0.00656408	-1.25056	0.00583728	-0.171559	0.58664	-0.123592	0.806322	-0.219526	0.643316	1.03104	0.00256863	-1.37415	0.00490055	paraoxonase 1 [Source:HGNC Symbol;Acc:HGNC:9204]
GCFC2	ENSG00000005436	4.75769	-0.219954	0.00043943	-0.13919	0.148689	-0.300718	0.00103553	-0.415535	2.2866e-11	-0.334771	0.000157184	-0.496299	3.13898e-08	-0.195581	0.00667955	-0.635489	6.05722e-10	GC-rich sequence DNA-binding factor 2 [Source:HGNC Symbol;Acc:HGNC:1317]
WDR54	ENSG00000005448	3.83473	0.484655	4.78125e-05	0.15362	0.430931	0.81569	1.35866e-06	0.569449	1.17513e-06	0.238414	0.193701	0.900484	3.69547e-08	0.0847937	0.558298	1.0541	7.10489e-08	WD repeat domain 54 [Source:HGNC Symbol;Acc:HGNC:25770]
CROT	ENSG00000005469	4.83601	-0.99469	3.26927e-13	-1.55239	6.04708e-16	-0.436992	0.0269355	1.14753	2.90649e-17	0.589834	0.00248584	1.70523	7.79068e-20	2.14222	7.25628e-34	0.152842	0.514815	carnitine O-octanoyltransferase [Source:HGNC Symbol;Acc:HGNC:2366]
ABCB4	ENSG00000005471	1.15256	-0.558712	1.4918e-05	-0.735004	7.32744e-05	-0.382419	0.0482329	0.719322	1.70469e-08	0.54303	0.00431282	0.895614	4.22195e-07	1.27803	2.33754e-16	0.16061	0.480195	ATP binding cassette subfamily B member 4 [Source:HGNC Symbol;Acc:HGNC:45]
KMT2E	ENSG00000005483	6.64894	-0.536772	2.98625e-10	-0.443553	0.000273616	-0.629992	4.69109e-07	0.129034	0.128968	0.222254	0.0785186	0.0358147	0.793643	0.665807	1.49987e-11	-0.407738	0.00285977	lysine methyltransferase 2E [Source:HGNC Symbol;Acc:HGNC:18541]
RHBDD2	ENSG00000005486	6.80962	0.319583	0.00234047	0.113376	0.51435	0.525791	0.000412021	0.168368	0.110465	-0.0378392	0.834489	0.374576	0.0110552	-0.151215	0.221322	0.487952	0.00423264	rhomboid domain containing 2 [Source:HGNC Symbol;Acc:HGNC:23082]
SOX8	ENSG00000005513	3.85922	1.23469	8.13986e-06	2.38474	8.10021e-08	0.0846437	0.856882	-4.18122	1.17552e-33	-3.03118	3.83813e-15	-5.33127	9.81947e-24	-5.41592	2.02593e-37	-2.94653	5.87405e-10	SRY-box transcription factor 8 [Source:HGNC Symbol;Acc:HGNC:11203]
IBTK	ENSG00000005700	6.26308	-0.514899	3.33203e-11	-0.626405	1.32037e-08	-0.403393	0.000315161	0.448609	2.73531e-09	0.337103	0.00251734	0.560116	1.12765e-07	0.963509	2.68087e-24	-0.0662898	0.631925	inhibitor of Bruton tyrosine kinase [Source:HGNC Symbol;Acc:HGNC:17853]
ZNF195	ENSG00000005801	4.68284	-0.1033	0.169567	-0.152393	0.172286	-0.0542076	0.650786	-0.221817	0.00179091	-0.27091	0.00921817	-0.172724	0.103461	-0.118516	0.162665	-0.325117	0.00571204	zinc finger protein 195 [Source:HGNC Symbol;Acc:HGNC:12986]
MYCBP2	ENSG00000005810	6.47314	-0.848843	9.9736e-14	-0.869986	3.94963e-08	-0.827701	5.7803e-07	-0.128673	0.255471	-0.149815	0.387786	-0.107531	0.532515	0.720171	2.00055e-08	-0.977516	6.40745e-08	MYC binding protein 2 [Source:HGNC Symbol;Acc:HGNC:23386]
FBXL3	ENSG00000005812	6.01553	-0.532801	1.81278e-09	-0.526621	3.17658e-05	-0.538982	3.08783e-05	0.392139	5.14478e-06	0.398319	0.00189365	0.385958	0.00162541	0.92494	2.62101e-18	-0.140663	0.354281	F-box and leucine rich repeat protein 3 [Source:HGNC Symbol;Acc:HGNC:13599]
ITGAL	ENSG00000005844	4.9716	-0.098584	0.616492	-0.0968377	0.75425	-0.10033	0.737367	0.0723263	0.707587	0.0740726	0.80961	0.0705801	0.80691	0.17091	0.422477	-0.0262576	0.93946	integrin subunit alpha L [Source:HGNC Symbol;Acc:HGNC:6148]
PDK2	ENSG00000005882	4.59282	-0.100225	0.408227	-0.354371	0.034141	0.15392	0.379966	0.639299	9.04789e-09	0.385154	0.0210175	0.893445	7.75848e-09	0.739524	1.56553e-08	0.539074	0.00326823	pyruvate dehydrogenase kinase 2 [Source:HGNC Symbol;Acc:HGNC:8810]
ITGA3	ENSG00000005884	6.60244	-0.285413	0.100872	-0.751501	0.00204231	0.180675	0.500909	0.125167	0.480791	-0.340921	0.179797	0.591255	0.0124721	0.41058	0.0359779	-0.160246	0.59881	integrin subunit alpha 3 [Source:HGNC Symbol;Acc:HGNC:6139]
ZFX	ENSG00000005889	6.02111	-0.495377	3.48596e-08	-0.5751	7.78492e-06	-0.415655	0.00155772	0.615491	4.88419e-12	0.535769	3.78939e-05	0.695214	1.68469e-08	1.11087	1.12696e-23	0.120114	0.443523	zinc finger protein X-linked [Source:HGNC Symbol;Acc:HGNC:12869]
LAMP2	ENSG00000005893	8.20951	-0.2096	0.015984	-0.197563	0.133805	-0.221637	0.0871325	-0.553365	9.01924e-11	-0.541328	7.13211e-06	-0.565402	4.58395e-06	-0.343765	0.000508047	-0.762966	5.58598e-08	lysosomal associated membrane protein 2 [Source:HGNC Symbol;Acc:HGNC:6501]
ITGA2B	ENSG00000005961	0.398347	0.603957	0.00158064	0.102207	0.759298	1.10571	3.73997e-05	-0.640468	0.000627998	-1.14222	1.48384e-05	-0.138718	0.646465	-1.24442	2.43257e-08	-0.0365111	0.921679	integrin subunit alpha 2b [Source:HGNC Symbol;Acc:HGNC:6138]
ASB4	ENSG00000005981	-1.5011	-1.2228	9.86388e-06	-0.978159	0.0121871	-1.46743	0.000539247	-1.47925	6.59935e-08	-1.23462	0.00100184	-1.72389	3.44246e-05	-0.256457	0.429598	-2.70205	9.46662e-09	ankyrin repeat and SOCS box containing 4 [Source:HGNC Symbol;Acc:HGNC:16009]
GDE1	ENSG00000006007	6.65439	-0.196675	0.0072048	-0.437018	3.2636e-05	0.0436685	0.719333	0.410181	1.03793e-08	0.169838	0.12323	0.650524	1.14446e-10	0.606856	1.30133e-12	0.213506	0.0773002	glycerophosphodiester phosphodiesterase 1 [Source:HGNC Symbol;Acc:HGNC:29644]
REX1BD	ENSG00000006015	4.44956	1.08133	2.13117e-13	0.976096	6.44088e-06	1.18656	4.08101e-09	-0.0418476	0.789643	-0.14708	0.519841	0.0633847	0.78284	-1.12318	1.96532e-11	1.03948	7.28794e-06	required for excision 1-B domain containing [Source:HGNC Symbol;Acc:HGNC:26098]
CRLF1	ENSG00000006016	4.14709	-0.0915982	0.759623	-0.775937	0.0440094	0.59274	0.126124	-3.09923	7.84871e-25	-3.78357	2.62896e-22	-2.41489	5.14719e-09	-3.00763	6.21365e-19	-3.19083	7.3404e-12	cytokine receptor like factor 1 [Source:HGNC Symbol;Acc:HGNC:2364]
OSBPL7	ENSG00000006025	3.39634	0.119677	0.293721	-0.215458	0.196474	0.454811	0.00315971	0.566782	9.04191e-08	0.231648	0.159491	0.901916	1.1757e-09	0.447105	0.000302629	0.686459	8.58556e-05	oxysterol binding protein like 7 [Source:HGNC Symbol;Acc:HGNC:16387]
TMEM98	ENSG00000006042	5.66729	-0.546848	0.000305328	-0.464499	0.038464	-0.629198	0.00524484	0.0417504	0.803392	0.1241	0.620675	-0.0405994	0.872419	0.588599	0.000728749	-0.505098	0.0432441	transmembrane protein 98 [Source:HGNC Symbol;Acc:HGNC:24529]
YBX2	ENSG00000006047	3.54208	0.954572	4.51361e-06	0.598464	0.0610822	1.31068	6.153e-06	-0.274276	0.191327	-0.630383	0.0340455	0.0818317	0.80717	-1.22885	3.3119e-07	0.680296	0.0465703	Y-box binding protein 2 [Source:HGNC Symbol;Acc:HGNC:17948]
KRT33A	ENSG00000006059	-1.6459	1.21467	0.000702187	1.01475	0.0695686	1.4146	0.00437147	0.211594	0.575431	0.0116686	0.985796	0.41152	0.436703	-1.00308	0.0143302	1.42627	0.0152857	keratin 33A [Source:HGNC Symbol;Acc:HGNC:6450]
MAP3K14	ENSG00000006062	4.28638	-0.0038442	0.974652	0.280048	0.0712153	-0.287736	0.0579732	-0.282861	0.004562	0.00103052	0.995462	-0.566753	9.52469e-05	-0.279017	0.0168842	-0.286706	0.0888572	mitogen-activated protein kinase kinase kinase 14 [Source:HGNC Symbol;Acc:HGNC:6853]
ABCC8	ENSG00000006071	3.05586	-0.225478	0.553205	-0.140444	0.820044	-0.310513	0.583425	2.63484	1.31909e-12	2.71987	1.30825e-06	2.54981	7.12759e-08	2.86032	3.38924e-11	2.40936	4.10693e-05	ATP binding cassette subfamily C member 8 [Source:HGNC Symbol;Acc:HGNC:59]
TMEM132A	ENSG00000006118	7.0017	0.970663	4.92019e-13	0.449882	0.0230144	1.49144	1.64158e-15	-0.807967	3.88677e-10	-1.32875	2.78132e-13	-0.287187	0.136023	-1.77863	8.19897e-27	0.162696	0.477791	transmembrane protein 132A [Source:HGNC Symbol;Acc:HGNC:31092]
AP2B1	ENSG00000006125	8.60126	-0.145954	0.169717	-0.314889	0.0385489	0.0229819	0.897067	0.649517	1.54857e-10	0.480582	0.00131912	0.818453	6.00331e-09	0.795471	3.22612e-11	0.503564	0.00244538	adaptor related protein complex 2 subunit beta 1 [Source:HGNC Symbol;Acc:HGNC:563]
TAC1	ENSG00000006128	-0.570139	0.835245	0.0134612	-0.047099	0.942656	1.71759	0.000131759	3.41499	8.54965e-20	2.53264	1.6015e-06	4.29733	3.69592e-19	2.57974	1.42938e-10	4.25023	3.5007e-12	tachykinin precursor 1 [Source:HGNC Symbol;Acc:HGNC:11517]
ZNF263	ENSG00000006194	5.40724	0.195535	0.00051356	0.074976	0.414236	0.316094	8.63789e-05	0.439377	7.95201e-15	0.318817	8.96917e-05	0.559936	1.17412e-12	0.243842	0.000163559	0.634912	8.47454e-12	zinc finger protein 263 [Source:HGNC Symbol;Acc:HGNC:13056]
CX3CL1	ENSG00000006210	6.47105	0.227892	0.230766	0.676537	0.0147206	-0.220753	0.444988	-1.33835	3.65589e-13	-0.889703	0.000451788	-1.78699	1.23196e-10	-1.56624	5.85551e-13	-1.11046	0.000176569	C-X3-C motif chemokine ligand 1 [Source:HGNC Symbol;Acc:HGNC:10647]
SPATA20	ENSG00000006282	5.95422	0.0513877	0.731844	-0.364207	0.0664264	0.466983	0.0144027	1.14334	3.85295e-17	0.727742	0.000186695	1.55893	4.1166e-17	1.09195	3.17798e-12	1.19472	4.27912e-08	spermatogenesis associated 20 [Source:HGNC Symbol;Acc:HGNC:26125]
CACNA1G	ENSG00000006283	0.467638	-0.237926	0.392918	0.0894269	0.84874	-0.565279	0.156696	0.0756708	0.791777	0.403023	0.32562	-0.251682	0.53511	0.313597	0.308255	-0.162255	0.734792	calcium voltage-gated channel subunit alpha1 G [Source:HGNC Symbol;Acc:HGNC:1394]
TNFRSF12A	ENSG00000006327	5.8906	0.319403	0.0342229	0.263945	0.264115	0.374862	0.0865865	-0.887522	1.66795e-09	-0.94298	4.60825e-06	-0.832063	0.000110708	-1.20693	6.198e-12	-0.568118	0.0195342	TNF receptor superfamily member 12A [Source:HGNC Symbol;Acc:HGNC:18152]
DLX6	ENSG00000006377	0.56295	1.4105	6.64399e-06	2.16162	6.84907e-06	0.659377	0.159147	-4.38671	1.36558e-30	-3.63559	1.25425e-16	-5.13783	1.99953e-19	-5.79721	8.72844e-35	-2.97621	1.68397e-08	distal-less homeobox 6 [Source:HGNC Symbol;Acc:HGNC:2919]
MAP3K9	ENSG00000006432	4.24854	-0.279972	0.010958	-0.382639	0.0174415	-0.177305	0.295861	-0.315601	0.00331143	-0.418268	0.00739812	-0.212934	0.190629	-0.0356288	0.79381	-0.595574	0.00077352	mitogen-activated protein kinase kinase kinase 9 [Source:HGNC Symbol;Acc:HGNC:6861]
RALA	ENSG00000006451	6.46679	-0.0820222	0.245605	-0.238634	0.0164861	0.0745893	0.485388	-0.329908	5.60373e-07	-0.48652	2.45364e-07	-0.173297	0.0774106	-0.247886	0.00132883	-0.41193	0.000152589	RAS like proto-oncogene A [Source:HGNC Symbol;Acc:HGNC:9839]
BAIAP2L1	ENSG00000006453	5.71549	0.225872	0.0187729	0.204926	0.167164	0.246817	0.0788991	-0.801565	9.17679e-17	-0.82251	5.79663e-10	-0.78062	1.43502e-08	-1.02744	4.73318e-19	-0.575693	0.00018319	BAR/IMD domain containing adaptor protein 2 like 1 [Source:HGNC Symbol;Acc:HGNC:21649]
KDM7A	ENSG00000006459	5.5218	-0.456338	4.21394e-05	-0.592209	0.000230837	-0.320467	0.05545	-0.335327	0.0022344	-0.471198	0.00295048	-0.199456	0.232894	0.121011	0.363894	-0.791665	1.2127e-05	lysine demethylase 7A [Source:HGNC Symbol;Acc:HGNC:22224]
ETV1	ENSG00000006468	3.85564	-0.510044	0.00107291	-0.513755	0.0251848	-0.506332	0.0301175	-0.400473	0.00923494	-0.404185	0.0770782	-0.396762	0.0836837	0.10957	0.562532	-0.910517	0.000325423	ETS variant transcription factor 1 [Source:HGNC Symbol;Acc:HGNC:3490]
AGK	ENSG00000006530	5.18102	0.029664	0.647127	0.0252118	0.807345	0.0341162	0.726025	-0.260733	4.59592e-06	-0.265185	0.00137119	-0.256281	0.00198736	-0.290397	1.36833e-05	-0.231069	0.0150116	acylglycerol kinase [Source:HGNC Symbol;Acc:HGNC:21869]
ALDH3B1	ENSG00000006534	4.17565	0.115151	0.431776	0.161071	0.470563	0.0692311	0.761534	-0.163299	0.238672	-0.117379	0.597007	-0.209219	0.308582	-0.27845	0.0777426	-0.0481479	0.851773	aldehyde dehydrogenase 3 family member B1 [Source:HGNC Symbol;Acc:HGNC:410]
TTC22	ENSG00000006555	4.12541	0.326043	0.0700671	1.075	6.47836e-05	-0.422917	0.113828	-1.20153	1.07173e-11	-0.452571	0.0790312	-1.95049	8.74332e-13	-1.52757	3.77799e-13	-0.875488	0.00224532	tetratricopeptide repeat domain 22 [Source:HGNC Symbol;Acc:HGNC:26067]
PHTF2	ENSG00000006576	5.26392	-0.271468	0.00052443	-0.408288	0.00032527	-0.134647	0.265485	-0.133722	0.089324	-0.270542	0.016963	0.0030982	0.981713	0.137746	0.133378	-0.40519	0.00143211	putative homeodomain transcription factor 2 [Source:HGNC Symbol;Acc:HGNC:13411]
CCL26	ENSG00000006606	-1.0888	0.495274	0.00929828	0.873268	0.00226289	0.11728	0.709591	-0.786288	2.23534e-05	-0.408294	0.146376	-1.16428	2.60373e-05	-1.28156	6.13413e-09	-0.291014	0.374075	C-C motif chemokine ligand 26 [Source:HGNC Symbol;Acc:HGNC:10625]
FARP2	ENSG00000006607	5.31723	-0.233723	0.00524666	-0.265806	0.0321182	-0.20164	0.108574	0.133994	0.110406	0.101911	0.444476	0.166076	0.174778	0.367717	0.000122117	-0.0997298	0.498784	FERM, ARH/RhoGEF and pleckstrin domain protein 2 [Source:HGNC Symbol;Acc:HGNC:16460]
USH1C	ENSG00000006611	0.302791	-0.08405	0.844052	-1.19037	0.0146656	1.02227	0.0414947	-3.52244	2.22783e-19	-4.62875	2.004e-19	-2.41612	6.35388e-06	-3.43839	7.02521e-15	-3.60649	3.31176e-09	USH1 protein network component harmonin [Source:HGNC Symbol;Acc:HGNC:12597]
GGCT	ENSG00000006625	6.55065	0.0990878	0.434278	-0.360935	0.0384595	0.559111	0.000799481	-0.622736	6.89517e-08	-1.08276	3.5815e-11	-0.162713	0.36193	-0.721824	1.06266e-07	-0.523648	0.00612722	gamma-glutamylcyclotransferase [Source:HGNC Symbol;Acc:HGNC:21705]
DBF4	ENSG00000006634	4.33999	0.100454	0.278754	-0.0736227	0.619149	0.274531	0.0323236	-0.940039	1.76287e-24	-1.11412	7.23109e-19	-0.765962	1.82139e-09	-1.04049	4.84092e-22	-0.839585	5.26686e-09	DBF4 zinc finger [Source:HGNC Symbol;Acc:HGNC:17364]
TBXA2R	ENSG00000006638	1.65737	0.444273	0.000407577	0.591988	0.00175778	0.296558	0.111783	-0.0438775	0.750078	0.103837	0.617735	-0.191592	0.314308	-0.488151	0.000721379	0.400396	0.0542279	thromboxane A2 receptor [Source:HGNC Symbol;Acc:HGNC:11608]
IFRD1	ENSG00000006652	5.633	0.255639	0.00295047	0.514921	5.83332e-05	-0.00364329	0.981376	-1.4819	2.35501e-48	-1.22262	8.31844e-23	-1.74118	4.53075e-34	-1.73754	1.82813e-47	-1.22626	3.42194e-17	interferon related developmental regulator 1 [Source:HGNC Symbol;Acc:HGNC:5456]
COX10	ENSG00000006695	4.10052	0.0119168	0.885124	0.0672412	0.56596	-0.0434077	0.710466	-0.36243	1.24247e-07	-0.307105	0.00204448	-0.417754	2.68348e-05	-0.374346	3.1633e-06	-0.350513	0.00198189	cytochrome c oxidase assembly factor heme A:farnesyltransferase COX10 [Source:HGNC Symbol;Acc:HGNC:2260]
GTF2IRD1	ENSG00000006704	5.36625	0.293382	5.44566e-05	0.0417024	0.742908	0.545062	1.6126e-07	-0.12919	0.0767289	-0.38087	0.000213847	0.12249	0.25835	-0.422572	4.80365e-07	0.164192	0.181468	GTF2I repeat domain containing 1 [Source:HGNC Symbol;Acc:HGNC:4661]
PAF1	ENSG00000006712	6.45912	0.338987	0.000474865	0.328814	0.0254274	0.34916	0.0128166	0.155814	0.110953	0.145641	0.339412	0.165987	0.249259	-0.183172	0.106059	0.494801	0.00170361	PAF1 homolog, Paf1/RNA polymerase II complex component [Source:HGNC Symbol;Acc:HGNC:25459]
VPS41	ENSG00000006715	6.01508	-0.270468	0.000133147	-0.515849	4.62322e-07	-0.0250883	0.836954	0.25031	0.000319671	0.00492966	0.969627	0.49569	4.35163e-07	0.520778	2.96638e-10	-0.0201587	0.882215	VPS41 subunit of HOPS complex [Source:HGNC Symbol;Acc:HGNC:12713]
ARHGAP44	ENSG00000006740	3.39677	-0.320602	0.0358261	-0.368384	0.105247	-0.27282	0.239632	-0.413722	0.00522552	-0.461504	0.0337975	-0.36594	0.0989641	-0.0931202	0.611295	-0.734324	0.00268746	Rho GTPase activating protein 44 [Source:HGNC Symbol;Acc:HGNC:29096]
ELAC2	ENSG00000006744	6.18339	0.158703	0.0188774	0.206364	0.0417739	0.111042	0.278622	-0.250939	0.000126107	-0.203278	0.0373534	-0.2986	0.00174985	-0.409643	1.10145e-07	-0.0922361	0.430536	elaC ribonuclease Z 2 [Source:HGNC Symbol;Acc:HGNC:14198]
SCIN	ENSG00000006747	3.58632	-0.114334	0.63776	-0.559669	0.0874616	0.331002	0.322891	1.43811	8.40351e-11	0.992779	0.00247404	1.88345	3.06515e-10	1.55245	2.03918e-09	1.32378	0.000227545	scinderin [Source:HGNC Symbol;Acc:HGNC:21695]
ARSD	ENSG00000006756	6.83624	-0.302581	0.00440903	-0.390454	0.0120361	-0.214709	0.184073	0.545343	1.62263e-07	0.457471	0.00322956	0.633216	1.39092e-05	0.847925	9.4371e-12	0.242762	0.173495	arylsulfatase D [Source:HGNC Symbol;Acc:HGNC:717]
PNPLA4	ENSG00000006757	4.74621	-0.0569493	0.647735	-0.195238	0.265826	0.0813397	0.659609	0.980905	1.05886e-17	0.842616	3.10748e-07	1.11919	5.00059e-13	1.03785	7.6223e-15	0.923956	4.19964e-07	patatin like phospholipase domain containing 4 [Source:HGNC Symbol;Acc:HGNC:24887]
MYH13	ENSG00000006788	-0.366643	-1.50406	4.56948e-10	-1.48992	6.6602e-06	-1.51821	2.54262e-05	-0.0237717	0.928972	-0.00962262	0.98202	-0.0379208	0.923395	1.48029	7.04893e-08	-1.52784	7.05444e-05	myosin heavy chain 13 [Source:HGNC Symbol;Acc:HGNC:7571]
ADIPOR2	ENSG00000006831	7.26717	0.0812341	0.497907	-0.0196673	0.924305	0.182136	0.277879	0.715331	5.77597e-11	0.614429	0.000129203	0.816232	6.17735e-08	0.634096	5.73061e-07	0.796565	7.95313e-06	adiponectin receptor 2 [Source:HGNC Symbol;Acc:HGNC:24041]
CDKL3	ENSG00000006837	0.170628	-0.112908	0.343875	-0.0371319	0.853939	-0.188685	0.275021	0.769803	5.53949e-12	0.84558	2.76734e-07	0.694027	6.45244e-06	0.882712	1.80922e-11	0.656895	0.000297458	cyclin dependent kinase like 3 [Source:HGNC Symbol;Acc:HGNC:15483]
UPP2	ENSG00000007001	-1.70802	-0.54922	0.0179958	-0.715348	0.034259	-0.383093	0.284252	0.163199	0.498595	-0.00292828	0.994394	0.329327	0.339542	0.712419	0.00710936	-0.386021	0.329126	uridine phosphorylase 2 [Source:HGNC Symbol;Acc:HGNC:23061]
PRSS21	ENSG00000007038	2.46865	0.515245	0.19621	1.19901	0.0468007	-0.168522	0.795541	-1.18862	0.00173868	-0.504853	0.393452	-1.87239	0.00136372	-1.70387	0.000140488	-0.673375	0.304746	serine protease 21 [Source:HGNC Symbol;Acc:HGNC:9485]
MARK4	ENSG00000007047	5.64138	0.446755	2.22771e-06	0.400944	0.00463661	0.492566	0.000240909	0.133136	0.164239	0.0873248	0.573257	0.178947	0.19764	-0.31362	0.00385123	0.579891	0.000151123	microtubule affinity regulating kinase 4 [Source:HGNC Symbol;Acc:HGNC:13538]
PROM1	ENSG00000007062	6.88968	0.27423	0.376775	0.691852	0.130269	-0.143391	0.770697	-2.71235	1.14857e-17	-2.29473	9.90628e-09	-3.12998	6.13444e-11	-2.98658	6.18121e-16	-2.43812	7.19456e-07	prominin 1 [Source:HGNC Symbol;Acc:HGNC:9454]
CCDC124	ENSG00000007080	5.79915	0.902425	6.7611e-12	0.825313	2.10092e-05	0.979536	7.08593e-08	-0.376621	0.00281521	-0.453732	0.0136157	-0.299509	0.113211	-1.27905	1.32461e-16	0.525804	0.0121523	coiled-coil domain containing 124 [Source:HGNC Symbol;Acc:HGNC:25171]
CEACAM21	ENSG00000007129	0.713598	0.00703415	0.973057	-0.184787	0.520477	0.198855	0.471233	0.0487946	0.801119	-0.143026	0.618025	0.240615	0.359646	0.0417604	0.849248	0.0558287	0.867545	CEA cell adhesion molecule 21 [Source:HGNC Symbol;Acc:HGNC:28834]
PAFAH1B1	ENSG00000007168	7.16147	-0.192966	0.00185665	-0.0793899	0.429699	-0.306542	0.000709859	0.0161534	0.814483	0.12973	0.170124	-0.0974228	0.297032	0.209119	0.003321	-0.176813	0.0861563	platelet activating factor acetylhydrolase 1b regulatory subunit 1 [Source:HGNC Symbol;Acc:HGNC:8574]
NOS2	ENSG00000007171	0.661264	0.255413	0.223086	0.69291	0.0237163	-0.182084	0.578014	-1.38334	7.79908e-12	-0.945839	0.000701689	-1.82083	2.44475e-09	-1.63875	6.54564e-12	-1.12792	0.000555379	nitric oxide synthase 2 [Source:HGNC Symbol;Acc:HGNC:7873]
DNAH9	ENSG00000007174	-0.251002	-0.969392	0.000382521	-1.18934	0.00226229	-0.749444	0.0700142	1.05069	9.19456e-05	0.830743	0.043714	1.27064	0.000642099	2.02008	6.02077e-10	0.0812998	0.875025	dynein axonemal heavy chain 9 [Source:HGNC Symbol;Acc:HGNC:2953]
KIAA0100	ENSG00000007202	7.77441	-0.23997	0.0153476	-0.78693	2.24766e-08	0.306991	0.0317387	0.150955	0.127141	-0.396006	0.00465945	0.697915	2.30694e-07	0.390925	0.000518141	-0.0890149	0.615203	KIAA0100 [Source:HGNC Symbol;Acc:HGNC:28960]
SLC13A2	ENSG00000007216	2.452	-0.154017	0.721479	0.889089	0.145103	-1.19712	0.0432121	1.05206	0.00573763	2.09516	0.000519383	0.00895252	0.9889	1.20608	0.0066167	0.898042	0.165517	solute carrier family 13 member 2 [Source:HGNC Symbol;Acc:HGNC:10917]
GAS7	ENSG00000007237	5.48721	-0.647656	2.63134e-06	-0.364983	0.0776015	-0.93033	6.71027e-06	0.475309	0.000437665	0.757982	0.000184172	0.192636	0.351591	1.12297	5.25908e-12	-0.172348	0.477165	growth arrest specific 7 [Source:HGNC Symbol;Acc:HGNC:4169]
TRAPPC6A	ENSG00000007255	4.92864	0.784467	5.8169e-09	0.707543	0.000425649	0.861391	4.62285e-06	0.631421	1.40155e-06	0.554497	0.00477953	0.708345	0.000110373	-0.153046	0.333889	1.41589	1.77895e-10	trafficking protein particle complex 6A [Source:HGNC Symbol;Acc:HGNC:23069]
MATK	ENSG00000007264	2.71931	0.662386	0.00181929	1.29183	7.80635e-05	0.0329458	0.929363	-0.938392	6.74673e-06	-0.308953	0.344382	-1.56783	7.6474e-07	-1.60078	1.78266e-10	-0.276007	0.456798	megakaryocyte-associated tyrosine kinase [Source:HGNC Symbol;Acc:HGNC:6906]
CEACAM7	ENSG00000007306	0.26193	-1.16469	0.00115914	-2.62747	2.0442e-07	0.29809	0.60156	0.0898262	0.816539	-1.37295	0.0055647	1.55261	0.00141164	1.25452	0.00243362	-1.07486	0.0686546	CEA cell adhesion molecule 7 [Source:HGNC Symbol;Acc:HGNC:1819]
CD79B	ENSG00000007312	3.0597	0.49063	0.0451149	0.66553	0.0750504	0.31573	0.397102	-0.303703	0.2145	-0.128803	0.751745	-0.478603	0.184496	-0.794333	0.00413591	0.186927	0.669026	CD79b molecule [Source:HGNC Symbol;Acc:HGNC:1699]
SCN4A	ENSG00000007314	0.851148	-0.684794	0.000417533	-0.702917	0.0128585	-0.666671	0.0221385	0.517682	0.00684677	0.499559	0.0896159	0.535805	0.0516321	1.20248	1.0692e-07	-0.167112	0.633233	sodium voltage-gated channel alpha subunit 4 [Source:HGNC Symbol;Acc:HGNC:10591]
ST7L	ENSG00000007341	3.67166	-0.0559375	0.423452	-0.0561198	0.607213	-0.0557552	0.598043	0.19008	0.00284705	0.189898	0.0485362	0.190263	0.0399954	0.246018	0.000939156	0.134143	0.222459	suppression of tumorigenicity 7 like [Source:HGNC Symbol;Acc:HGNC:18441]
TKTL1	ENSG00000007350	-1.23774	1.23097	0.00026944	3.27928	6.18676e-10	-0.817342	0.110164	-2.67296	5.4803e-15	-0.624645	0.188275	-4.72127	1.38123e-16	-3.90392	5.19064e-21	-1.44199	0.00753944	transketolase like 1 [Source:HGNC Symbol;Acc:HGNC:11835]
PAX6	ENSG00000007372	2.65054	0.227738	0.25425	0.627723	0.0311282	-0.172247	0.578587	-1.6984	9.93323e-18	-1.29842	7.01586e-07	-2.09839	1.56288e-12	-1.92614	1.35938e-16	-1.47066	2.4663e-06	paired box 6 [Source:HGNC Symbol;Acc:HGNC:8620]
RPUSD1	ENSG00000007376	5.02406	0.825508	7.01072e-14	0.645852	5.58899e-05	1.00516	4.95754e-11	-0.0284001	0.81023	-0.208057	0.198129	0.151256	0.345663	-0.853908	9.47436e-12	0.797108	4.2924e-06	RNA pseudouridine synthase domain containing 1 [Source:HGNC Symbol;Acc:HGNC:14173]
RHBDF1	ENSG00000007384	5.6873	0.364018	7.7342e-05	0.349761	0.011832	0.378274	0.00426629	0.437265	1.35022e-06	0.423008	0.00170701	0.451521	0.000420084	0.0732468	0.511553	0.801282	1.03307e-07	rhomboid 5 homolog 1 [Source:HGNC Symbol;Acc:HGNC:20561]
LUC7L	ENSG00000007392	5.44284	0.404832	1.77941e-05	0.35439	0.012832	0.455274	0.000716794	0.517714	2.61803e-08	0.467272	0.000701689	0.568157	1.28627e-05	0.112882	0.314699	0.922546	2.80043e-09	LUC7 like [Source:HGNC Symbol;Acc:HGNC:6723]
CACNA2D2	ENSG00000007402	4.08028	-0.2603	0.165322	-0.794164	0.00231028	0.273563	0.323626	2.56017	6.07146e-34	2.0263	1.3858e-12	3.09403	2.6219e-30	2.82047	7.54435e-31	2.29987	1.95319e-13	calcium voltage-gated channel auxiliary subunit alpha2delta 2 [Source:HGNC Symbol;Acc:HGNC:1400]
BAIAP3	ENSG00000007516	3.89418	0.579308	0.00204616	-0.223733	0.461358	1.38235	1.47447e-07	2.85413	5.99392e-37	2.05109	4.19319e-12	3.65717	3.15656e-36	2.27482	1.12687e-21	3.43344	1.85508e-22	BAI1 associated protein 3 [Source:HGNC Symbol;Acc:HGNC:948]
TSR3	ENSG00000007520	5.46221	0.683603	2.70114e-09	0.671732	8.45212e-05	0.695474	1.54653e-05	0.113671	0.332098	0.1018	0.586326	0.125542	0.470094	-0.569932	1.29197e-05	0.797274	1.55082e-05	TSR3 ribosome maturation factor [Source:HGNC Symbol;Acc:HGNC:14175]
PIGQ	ENSG00000007541	6.14503	0.451146	1.22737e-05	0.117483	0.490709	0.784808	8.93435e-08	0.914106	4.92038e-18	0.580444	0.00011728	1.24777	8.21259e-18	0.462961	9.49575e-05	1.36525	5.47345e-15	phosphatidylinositol glycan anchor biosynthesis class Q [Source:HGNC Symbol;Acc:HGNC:14135]
CRAMP1	ENSG00000007545	4.70237	0.284361	0.000106363	0.0637686	0.608236	0.504952	1.46768e-06	0.343856	1.81931e-06	0.123264	0.280572	0.564448	2.75375e-08	0.0594951	0.503011	0.628216	1.50838e-07	cramped chromatin regulator homolog 1 [Source:HGNC Symbol;Acc:HGNC:14122]
TEAD3	ENSG00000007866	5.57604	0.24511	0.00109419	0.0924094	0.452084	0.397811	0.000200729	-0.445014	1.83515e-09	-0.597715	1.30247e-08	-0.292313	0.00663301	-0.690124	8.88067e-15	-0.199903	0.11065	TEA domain transcription factor 3 [Source:HGNC Symbol;Acc:HGNC:11716]
SELE	ENSG00000007908	3.55258	-0.00992019	0.972829	0.435729	0.266804	-0.455569	0.230748	-0.381655	0.122201	0.0639939	0.881462	-0.827304	0.0221427	-0.371735	0.197221	-0.391575	0.3554	selectin E [Source:HGNC Symbol;Acc:HGNC:10718]
DNAJC11	ENSG00000007923	5.09693	0.0250167	0.767094	-0.142102	0.217665	0.192136	0.0793876	-0.371736	2.99335e-07	-0.538855	1.95219e-07	-0.204617	0.0571958	-0.396753	3.1254e-06	-0.346719	0.00392619	DnaJ heat shock protein family (Hsp40) member C11 [Source:HGNC Symbol;Acc:HGNC:25570]
FMO3	ENSG00000007933	4.17326	0.188733	0.618521	-0.239797	0.6792	0.617262	0.229225	-2.80373	4.19719e-14	-3.23226	2.09784e-11	-2.3752	9.45881e-06	-2.99246	3.3923e-12	-2.615	7.35644e-06	flavin containing dimethylaniline monoxygenase 3 [Source:HGNC Symbol;Acc:HGNC:3771]
MYLIP	ENSG00000007944	5.46704	-0.376347	0.000114071	-0.564829	6.04867e-05	-0.187866	0.209564	0.591708	9.39225e-10	0.403226	0.00493613	0.780189	6.74982e-09	0.968055	1.52114e-16	0.215361	0.192061	myosin regulatory light chain interacting protein [Source:HGNC Symbol;Acc:HGNC:21155]
NOX1	ENSG00000007952	0.473014	0.503009	0.000133958	0.17506	0.416057	0.830957	8.12193e-06	0.291139	0.0260398	-0.03681	0.8735	0.619087	0.000681368	-0.21187	0.170925	0.794147	0.000208036	NADPH oxidase 1 [Source:HGNC Symbol;Acc:HGNC:7889]
E2F2	ENSG00000007968	3.966	0.816316	2.57573e-09	0.598408	0.0033301	1.03422	6.74705e-08	-1.67499	1.03332e-29	-1.8929	2.60138e-22	-1.45709	9.87083e-13	-2.49131	3.41152e-40	-0.858678	9.09658e-05	E2F transcription factor 2 [Source:HGNC Symbol;Acc:HGNC:3114]
PSMB1	ENSG00000008018	7.39568	0.311911	0.000409184	0.235366	0.0827342	0.388455	0.00213715	-0.239389	0.00596201	-0.315933	0.0130337	-0.162844	0.216959	-0.5513	6.80158e-08	0.0725221	0.650869	proteasome 20S subunit beta 1 [Source:HGNC Symbol;Acc:HGNC:9537]
SYN1	ENSG00000008056	1.60384	0.609609	0.00847582	0.231837	0.547143	0.987381	0.00228568	0.914776	5.38891e-05	0.537004	0.127529	1.29255	3.5129e-05	0.305167	0.260942	1.52439	5.60125e-05	synapsin I [Source:HGNC Symbol;Acc:HGNC:11494]
JARID2	ENSG00000008083	5.75047	-0.113989	0.26172	-0.0582438	0.726848	-0.169734	0.253663	-0.395994	2.76097e-05	-0.340249	0.0143054	-0.451739	0.00108813	-0.282005	0.0111637	-0.509982	0.00111215	jumonji and AT-rich interaction domain containing 2 [Source:HGNC Symbol;Acc:HGNC:6196]
CDKL5	ENSG00000008086	4.64924	-0.619769	3.62949e-07	-0.666679	0.000134083	-0.572859	0.00142245	-0.436637	0.000244381	-0.483546	0.00517441	-0.389727	0.0271698	0.183132	0.200494	-1.05641	1.05938e-07	cyclin dependent kinase like 5 [Source:HGNC Symbol;Acc:HGNC:11411]
CAMK1G	ENSG00000008118	-0.638906	0.91934	1.17188e-05	0.104889	0.774866	1.73379	4.3575e-09	-0.260631	0.21829	-1.07508	0.000219537	0.55382	0.061159	-1.17997	1.24075e-06	0.658709	0.0563741	calcium/calmodulin dependent protein kinase IG [Source:HGNC Symbol;Acc:HGNC:14585]
CDK11A	ENSG00000008128	2.4164	0.485071	3.16675e-07	0.406264	0.00419573	0.563878	2.73067e-05	0.0859672	0.381666	0.0071603	0.966476	0.164774	0.239974	-0.399104	0.000237811	0.571038	0.000196739	cyclin dependent kinase 11A [Source:HGNC Symbol;Acc:HGNC:1730]
NADK	ENSG00000008130	5.92254	0.243133	0.000561201	0.167383	0.124833	0.318883	0.00162073	-0.0297066	0.698184	-0.105457	0.336837	0.0460435	0.681188	-0.27284	0.000753442	0.213427	0.0681363	NAD kinase [Source:HGNC Symbol;Acc:HGNC:29831]
TFAP2B	ENSG00000008196	5.98588	-1.25594	0.00240263	-1.65551	0.00440506	-0.856364	0.178395	0.0963031	0.831599	-0.303268	0.649599	0.495875	0.415587	1.35224	0.00440915	-1.15963	0.0895129	transcription factor AP-2 beta [Source:HGNC Symbol;Acc:HGNC:11743]
DLEC1	ENSG00000008226	0.447279	0.203468	0.263646	0.414158	0.124708	-0.00722126	0.98162	0.468095	0.00610281	0.678784	0.00836921	0.257405	0.318598	0.264626	0.193142	0.671563	0.0181399	DLEC1 cilia and flagella associated protein [Source:HGNC Symbol;Acc:HGNC:2899]
CYTH3	ENSG00000008256	5.41825	0.0153723	0.89603	0.256398	0.0930445	-0.225654	0.132833	-0.238899	0.0148132	0.00212711	0.990982	-0.479925	0.00072859	-0.254271	0.0263813	-0.223527	0.181079	cytohesin 3 [Source:HGNC Symbol;Acc:HGNC:9504]
ADAM22	ENSG00000008277	3.25028	-0.642194	5.72194e-05	-0.790208	0.000560805	-0.494181	0.039124	0.578073	0.000225489	0.43006	0.0741138	0.726087	0.000983663	1.22027	8.9316e-11	-0.064121	0.83127	ADAM metallopeptidase domain 22 [Source:HGNC Symbol;Acc:HGNC:201]
SYPL1	ENSG00000008282	7.26132	-0.236262	0.0109579	-0.0288172	0.862879	-0.443708	0.00105815	0.0783549	0.414542	0.2858	0.0368918	-0.12909	0.356726	0.314617	0.00298893	-0.157908	0.31981	synaptophysin like 1 [Source:HGNC Symbol;Acc:HGNC:11507]
CYB561	ENSG00000008283	7.6795	0.0898143	0.508233	-0.427037	0.0196127	0.606666	0.000574912	0.0625881	0.639746	-0.454263	0.0106038	0.57944	0.000753257	-0.0272262	0.861672	0.152402	0.48689	cytochrome b561 [Source:HGNC Symbol;Acc:HGNC:2571]
SPAG9	ENSG00000008294	6.72209	-0.273476	0.00625263	-0.465918	0.00123695	-0.0810349	0.619627	-0.11836	0.244571	-0.310801	0.0315207	0.0740817	0.636292	0.155117	0.18521	-0.391836	0.0160802	sperm associated antigen 9 [Source:HGNC Symbol;Acc:HGNC:14524]
CELSR3	ENSG00000008300	3.94715	0.391076	0.0520751	-0.232122	0.4683	1.01427	0.000253093	-0.228312	0.257769	-0.851511	0.00213391	0.394886	0.168976	-0.619388	0.00644105	0.162764	0.648727	cadherin EGF LAG seven-pass G-type receptor 3 [Source:HGNC Symbol;Acc:HGNC:3230]
AASS	ENSG00000008311	2.53981	-1.01962	1.97355e-12	-1.00379	5.84754e-07	-1.03544	1.11533e-06	0.557091	5.58806e-05	0.572918	0.00592953	0.541265	0.00593197	1.57671	1.0442e-19	-0.462525	0.0465703	aminoadipate-semialdehyde synthase [Source:HGNC Symbol;Acc:HGNC:17366]
PLEKHG6	ENSG00000008323	4.29349	0.45019	0.00208861	0.67401	0.00223181	0.22637	0.312128	-1.01838	3.37889e-12	-0.794565	9.40752e-05	-1.2422	8.81469e-09	-1.46858	9.96245e-17	-0.568195	0.0174534	pleckstrin homology and RhoGEF domain containing G6 [Source:HGNC Symbol;Acc:HGNC:25562]
SS18L2	ENSG00000008324	4.16223	0.349118	2.27183e-05	0.314656	0.0112559	0.38358	0.00115036	-0.151177	0.0672431	-0.185639	0.133396	-0.116715	0.35166	-0.500295	1.52041e-07	0.197941	0.153701	SS18 like 2 [Source:HGNC Symbol;Acc:HGNC:15593]
MPND	ENSG00000008382	4.32492	0.578598	3.62465e-07	0.611453	0.000328355	0.545743	0.000704638	0.144057	0.212256	0.176912	0.318749	0.111202	0.525105	-0.434541	0.000839709	0.722655	8.57649e-05	MPN domain containing [Source:HGNC Symbol;Acc:HGNC:25934]
MGST1	ENSG00000008394	7.57414	-0.279361	0.0989411	-0.297703	0.245519	-0.261019	0.309452	-0.718176	8.91502e-06	-0.736518	0.00146772	-0.699833	0.00343278	-0.438814	0.0209659	-0.997537	0.000196188	microsomal glutathione S-transferase 1 [Source:HGNC Symbol;Acc:HGNC:7061]
CRY1	ENSG00000008405	4.79565	-0.225564	0.00199003	-0.273402	0.0109047	-0.177726	0.105538	-0.04478	0.563845	-0.0926182	0.42192	0.0030582	0.980704	0.180784	0.0320494	-0.270344	0.0236131	cryptochrome circadian regulator 1 [Source:HGNC Symbol;Acc:HGNC:2384]
NFIX	ENSG00000008441	7.55047	-0.170756	0.259599	0.350552	0.117047	-0.692065	0.00121077	-0.685466	1.27096e-06	-0.164157	0.473895	-1.20677	1.40779e-08	-0.514709	0.00187222	-0.856222	0.000251651	nuclear factor I X [Source:HGNC Symbol;Acc:HGNC:7788]
ST3GAL1	ENSG00000008513	6.98281	0.481441	0.000206613	-0.0605007	0.791004	1.02338	2.71664e-08	0.382024	0.00277507	-0.159918	0.435875	0.923966	2.00132e-07	-0.0994176	0.527196	0.863465	4.26805e-05	ST3 beta-galactoside alpha-2,3-sialyltransferase 1 [Source:HGNC Symbol;Acc:HGNC:10862]
MMP25	ENSG00000008516	2.7646	0.97816	6.88028e-06	0.732196	0.0275963	1.22412	5.09611e-05	0.449574	0.0364293	0.20361	0.565891	0.695537	0.0213337	-0.528586	0.0342845	1.42773	5.75652e-05	matrix metallopeptidase 25 [Source:HGNC Symbol;Acc:HGNC:14246]
IL32	ENSG00000008517	5.98466	0.592701	0.000666128	1.03638	9.64789e-05	0.149022	0.596489	-1.18774	1.06902e-11	-0.744064	0.00237995	-1.63142	5.68782e-10	-1.78044	5.74479e-17	-0.595042	0.0378525	interleukin 32 [Source:HGNC Symbol;Acc:HGNC:16830]
PKD1	ENSG00000008710	5.94332	0.243099	0.00537135	0.182394	0.179705	0.303804	0.0158365	0.201398	0.0193369	0.140693	0.298999	0.262103	0.0341517	-0.0417012	0.697321	0.444497	0.00163124	polycystin 1, transient receptor potential channel interacting [Source:HGNC Symbol;Acc:HGNC:9008]
MAPK8IP2	ENSG00000008735	5.14753	0.581346	0.00910363	0.285047	0.431908	0.877644	0.00507989	0.397673	0.0723996	0.101374	0.790207	0.693971	0.0251074	-0.183673	0.490527	0.979018	0.00690549	mitogen-activated protein kinase 8 interacting protein 2 [Source:HGNC Symbol;Acc:HGNC:6883]
MED24	ENSG00000008838	7.06539	-0.0829601	0.629105	-0.769779	0.000529597	0.603859	0.00628916	-0.54181	0.000357613	-1.22863	9.46963e-09	0.145009	0.544615	-0.45885	0.0100341	-0.62477	0.0135655	mediator complex subunit 24 [Source:HGNC Symbol;Acc:HGNC:22963]
RHOBTB2	ENSG00000008853	4.32374	-0.546823	2.61287e-07	-0.62972	3.56168e-05	-0.463926	0.00298508	0.270386	0.00974481	0.187489	0.253312	0.353283	0.0182073	0.817209	4.60042e-11	-0.276437	0.118208	Rho related BTB domain containing 2 [Source:HGNC Symbol;Acc:HGNC:18756]
HEATR5B	ENSG00000008869	5.72732	-0.407409	4.46332e-08	-0.452207	2.4594e-05	-0.362612	0.000848526	0.255927	0.000434468	0.21113	0.0562191	0.300725	0.00387624	0.663337	4.10699e-14	-0.151482	0.229458	HEAT repeat containing 5B [Source:HGNC Symbol;Acc:HGNC:29273]
SEC62	ENSG00000008952	7.52632	-0.369056	4.79705e-08	-0.385886	7.68595e-05	-0.352226	0.000349845	0.195294	0.00322486	0.178464	0.0770203	0.212125	0.0269951	0.56435	1.04931e-12	-0.173762	0.123161	SEC62 homolog, preprotein translocation factor [Source:HGNC Symbol;Acc:HGNC:11846]
RPS20	ENSG00000008988	9.96153	0.783917	3.87388e-11	0.688972	8.29695e-05	0.878861	1.00349e-07	-0.538885	2.29806e-06	-0.63383	9.88675e-05	-0.443941	0.00817683	-1.3228	1.79238e-20	0.245031	0.213731	ribosomal protein S20 [Source:HGNC Symbol;Acc:HGNC:10405]
CSDE1	ENSG00000009307	9.46513	-0.134867	0.0571507	-0.121718	0.265206	-0.148016	0.16055	-0.348539	3.11915e-07	-0.33539	0.000668372	-0.361688	0.00025811	-0.213672	0.007526	-0.483406	1.68094e-05	cold shock domain containing E1 [Source:HGNC Symbol;Acc:HGNC:29905]
UBE3C	ENSG00000009335	6.95037	-0.120753	0.128744	-0.276212	0.0150386	0.0347049	0.789898	-0.26996	0.000341755	-0.425418	8.57444e-05	-0.114501	0.325611	-0.149206	0.0964115	-0.390713	0.00174231	ubiquitin protein ligase E3C [Source:HGNC Symbol;Acc:HGNC:16803]
REV3L	ENSG00000009413	5.09344	-0.69691	6.43218e-10	-0.718654	6.72487e-06	-0.675167	4.24399e-05	-0.369327	0.000721911	-0.391071	0.0145536	-0.347584	0.0315988	0.327583	0.0106687	-1.06624	5.60572e-09	REV3 like, DNA directed polymerase zeta catalytic subunit [Source:HGNC Symbol;Acc:HGNC:9968]
TENM1	ENSG00000009694	1.27559	-1.1351	0.000194977	-1.75691	3.76081e-05	-0.513288	0.278193	-1.77845	6.49047e-09	-2.40026	8.1009e-09	-1.15664	0.0101047	-0.643352	0.066791	-2.91355	2.55317e-08	teneurin transmembrane protein 1 [Source:HGNC Symbol;Acc:HGNC:8117]
PAX7	ENSG00000009709	1.79831	-0.341232	0.556497	-1.7784	0.0194416	1.09594	0.156696	-1.07423	0.0429616	-2.51139	0.000611135	0.362941	0.66023	-0.732994	0.240773	-1.41546	0.112809	paired box 7 [Source:HGNC Symbol;Acc:HGNC:8621]
MASP2	ENSG00000009724	0.273649	-0.589743	0.000404558	-0.668427	0.00578285	-0.511059	0.0412907	0.624044	0.000139436	0.54536	0.0286405	0.702729	0.00236686	1.21379	5.84785e-10	0.0343012	0.915534	mannan binding lectin serine peptidase 2 [Source:HGNC Symbol;Acc:HGNC:6902]
IYD	ENSG00000009765	1.73505	-1.35647	0.000366444	-3.12911	7.05262e-09	0.416158	0.478477	-0.495903	0.193754	-2.26854	1.07003e-05	1.27673	0.013906	0.860571	0.0491467	-1.85238	0.00296826	iodotyrosine deiodinase [Source:HGNC Symbol;Acc:HGNC:21071]
FAM76A	ENSG00000009780	3.97778	-0.00703389	0.916517	0.10743	0.227764	-0.121498	0.156591	-0.209545	0.000154052	-0.0950803	0.275079	-0.324009	5.46921e-05	-0.202511	0.00181682	-0.216579	0.0193125	family with sequence similarity 76 member A [Source:HGNC Symbol;Acc:HGNC:28530]
TRAF3IP3	ENSG00000009790	3.58371	0.058154	0.774105	0.570945	0.0361998	-0.454637	0.0917945	-0.743023	2.07223e-05	-0.230232	0.408708	-1.25581	1.69304e-06	-0.801177	8.98366e-05	-0.684869	0.0188081	TRAF3 interacting protein 3 [Source:HGNC Symbol;Acc:HGNC:30766]
POMT2	ENSG00000009830	4.68809	-0.0846645	0.267264	-0.119762	0.295821	-0.049567	0.681703	0.229618	0.00124346	0.194521	0.0726253	0.264716	0.00954366	0.314283	0.000155912	0.144954	0.239364	protein O-mannosyltransferase 2 [Source:HGNC Symbol;Acc:HGNC:19743]
VTA1	ENSG00000009844	5.9293	-0.144892	0.0836356	-0.285754	0.0178858	-0.00402981	0.977958	-0.397127	6.9384e-07	-0.53799	2.4668e-06	-0.256265	0.0300468	-0.252235	0.00723283	-0.54202	4.04402e-05	vesicle trafficking 1 [Source:HGNC Symbol;Acc:HGNC:20954]
MLXIPL	ENSG00000009950	1.5408	-0.122923	0.664972	-0.449593	0.255592	0.203747	0.622176	0.495214	0.0518227	0.168544	0.694661	0.821884	0.0209953	0.618137	0.0364443	0.372291	0.401574	MLX interacting protein like [Source:HGNC Symbol;Acc:HGNC:12744]
BAZ1B	ENSG00000009954	7.38259	-0.183593	0.00581659	-0.290006	0.0027318	-0.0771806	0.463758	-0.401333	8.2486e-10	-0.507746	4.64862e-08	-0.29492	0.00181478	-0.21774	0.00425288	-0.584927	5.74515e-08	bromodomain adjacent to zinc finger domain 1B [Source:HGNC Symbol;Acc:HGNC:961]
RANBP9	ENSG00000010017	6.30767	-0.137037	0.0769036	-0.504582	3.66042e-06	0.230507	0.0372389	-0.116033	0.128211	-0.483578	5.00135e-06	0.251512	0.0188953	0.0210044	0.824818	-0.253071	0.042213	RAN binding protein 9 [Source:HGNC Symbol;Acc:HGNC:13727]
ETV7	ENSG00000010030	3.32136	0.443553	0.0164223	0.765366	0.00598888	0.12174	0.688172	-1.35906	2.42588e-13	-1.03725	4.25248e-05	-1.68088	1.32122e-09	-1.80262	6.06482e-16	-0.91551	0.00212884	ETS variant transcription factor 7 [Source:HGNC Symbol;Acc:HGNC:18160]
SPRTN	ENSG00000010072	4.25123	-0.121362	0.102104	-0.0123381	0.927588	-0.230385	0.0313473	-0.371883	1.47348e-07	-0.262859	0.0114026	-0.480906	2.96135e-06	-0.250521	0.00249003	-0.493244	2.32932e-05	SprT-like N-terminal domain [Source:HGNC Symbol;Acc:HGNC:25356]
EEF1AKNMT	ENSG00000010165	5.95438	0.0534417	0.531359	0.230085	0.051805	-0.123202	0.307593	-0.305065	6.1156e-05	-0.128422	0.283621	-0.481709	1.41238e-05	-0.358507	5.89529e-05	-0.251623	0.0499228	eEF1A lysine and N-terminal methyltransferase [Source:HGNC Symbol;Acc:HGNC:24248]
DYRK4	ENSG00000010219	4.42903	0.358561	0.000381511	0.566355	0.000182357	0.150766	0.334196	-0.461716	3.09365e-06	-0.253921	0.0895163	-0.66951	4.03667e-06	-0.820276	4.83487e-12	-0.103155	0.568287	dual specificity tyrosine phosphorylation regulated kinase 4 [Source:HGNC Symbol;Acc:HGNC:3095]
ZNF207	ENSG00000010244	7.35366	-0.154428	0.00177676	-0.169506	0.0209973	-0.139349	0.0584724	-0.0137512	0.801785	-0.0288293	0.73079	0.00132703	0.987421	0.140676	0.0134764	-0.168179	0.0386691	zinc finger protein 207 [Source:HGNC Symbol;Acc:HGNC:12998]
UQCRC1	ENSG00000010256	7.37346	0.352719	0.000296538	0.176653	0.253515	0.528785	0.000135398	-0.252442	0.0087384	-0.428507	0.00198603	-0.0763759	0.620397	-0.605161	8.16956e-08	0.100277	0.565611	ubiquinol-cytochrome c reductase core protein 1 [Source:HGNC Symbol;Acc:HGNC:12585]
STARD3NL	ENSG00000010270	4.91833	-0.0474296	0.530702	-0.164813	0.117036	0.0699538	0.526744	-0.00642814	0.935373	-0.123812	0.240149	0.110955	0.280889	0.0410015	0.625896	-0.0538578	0.667757	STARD3 N-terminal like [Source:HGNC Symbol;Acc:HGNC:19169]
CD9	ENSG00000010278	8.80107	0.158955	0.167052	0.14544	0.421128	0.172469	0.310916	0.0100205	0.937286	-0.00349371	0.986808	0.0235348	0.899113	-0.148934	0.255201	0.168975	0.379263	CD9 molecule [Source:HGNC Symbol;Acc:HGNC:1709]
NCAPD2	ENSG00000010292	7.09645	0.285078	0.00606122	0.317324	0.0437188	0.252833	0.0989174	-1.3533	8.64225e-33	-1.32106	3.43368e-19	-1.38555	2.6239e-18	-1.63838	9.30196e-34	-1.06823	3.64914e-10	non-SMC condensin I complex subunit D2 [Source:HGNC Symbol;Acc:HGNC:24305]
IFFO1	ENSG00000010295	3.29987	0.0309272	0.826123	0.152879	0.443649	-0.0910248	0.652133	0.108887	0.389507	0.230839	0.219352	-0.0130653	0.949725	0.0779595	0.599152	0.139814	0.517445	intermediate filament family orphan 1 [Source:HGNC Symbol;Acc:HGNC:24970]
GIPR	ENSG00000010310	1.45671	0.0508982	0.816943	-0.228553	0.457244	0.330349	0.247701	2.18048	1.4469e-25	1.90103	1.25324e-10	2.45993	5.554e-20	2.12958	2.59518e-19	2.23138	6.58449e-12	gastric inhibitory polypeptide receptor [Source:HGNC Symbol;Acc:HGNC:4271]
PHF7	ENSG00000010318	2.33587	0.143602	0.155875	0.219041	0.148994	0.0681625	0.673381	0.74803	2.43815e-14	0.823469	1.0022e-08	0.672591	5.34988e-07	0.604429	8.3943e-08	0.891632	2.36151e-08	PHD finger protein 7 [Source:HGNC Symbol;Acc:HGNC:18458]
SEMA3G	ENSG00000010319	4.54214	-0.171673	0.341024	0.0605284	0.843068	-0.403875	0.116669	1.10151	8.68605e-11	1.33371	1.74119e-07	0.86931	0.000185156	1.27318	1.84632e-10	0.929839	0.000761178	semaphorin 3G [Source:HGNC Symbol;Acc:HGNC:30400]
NISCH	ENSG00000010322	6.44589	0.127483	0.0576704	0.17016	0.0921246	0.0848051	0.411435	0.520147	3.74458e-15	0.562824	4.45421e-09	0.477469	1.5492e-07	0.392664	2.30093e-07	0.647629	1.84415e-09	nischarin [Source:HGNC Symbol;Acc:HGNC:18006]
STAB1	ENSG00000010327	5.87589	-0.0171699	0.914054	0.273959	0.193786	-0.308299	0.129742	-0.0723802	0.61397	0.218749	0.295792	-0.363509	0.0638684	-0.0552103	0.739654	-0.0895501	0.715908	stabilin 1 [Source:HGNC Symbol;Acc:HGNC:18628]
FUZ	ENSG00000010361	4.14315	0.516036	5.79778e-06	0.519108	0.00239061	0.512965	0.00155275	0.848309	1.22016e-13	0.85138	3.7291e-07	0.845237	6.17735e-08	0.332272	0.0112592	1.36434	8.8253e-13	fuzzy planar cell polarity protein [Source:HGNC Symbol;Acc:HGNC:26219]
SLC6A13	ENSG00000010379	-2.97658	0.201238	0.445198	-0.51305	0.172857	0.915525	0.0111642	-0.669588	0.00621512	-1.38388	5.95681e-05	0.0446995	0.914928	-0.870826	0.00259426	-0.46835	0.267838	solute carrier family 6 member 13 [Source:HGNC Symbol;Acc:HGNC:11046]
IDS	ENSG00000010404	6.78489	-0.0541605	0.535363	-0.0542603	0.690753	-0.0540608	0.683893	0.29149	0.000183382	0.29139	0.0126946	0.291589	0.00925563	0.34565	0.000152908	0.237329	0.0721195	iduronate 2-sulfatase [Source:HGNC Symbol;Acc:HGNC:5389]
PRSS3	ENSG00000010438	0.248076	2.04478	3.15658e-10	2.31041	3.74477e-06	1.77915	3.81889e-05	-1.56009	4.34251e-07	-1.29445	0.00279248	-1.82572	8.65725e-05	-3.60487	7.19868e-19	0.484693	0.362711	serine protease 3 [Source:HGNC Symbol;Acc:HGNC:9486]
ZNF200	ENSG00000010539	3.7428	-0.105025	0.0704984	-0.175238	0.0389048	-0.0348122	0.71387	-0.175959	0.00158535	-0.246172	0.00239435	-0.105746	0.210523	-0.0709338	0.292121	-0.280984	0.00225832	zinc finger protein 200 [Source:HGNC Symbol;Acc:HGNC:12993]
CD4	ENSG00000010610	6.20071	-0.161929	0.280279	0.0497799	0.845861	-0.373638	0.0814836	-0.338548	0.0160384	-0.126839	0.584528	-0.550257	0.00750661	-0.176619	0.294507	-0.500477	0.0321785	CD4 molecule [Source:HGNC Symbol;Acc:HGNC:1678]
LRRC23	ENSG00000010626	3.48629	0.223255	0.0450375	-0.0360369	0.854885	0.482547	0.00199918	0.363976	0.000701355	0.104684	0.558846	0.623268	3.55862e-05	0.140721	0.277862	0.587231	0.000947454	leucine rich repeat containing 23 [Source:HGNC Symbol;Acc:HGNC:19138]
BTK	ENSG00000010671	3.41012	-0.312166	0.025378	-0.104565	0.655579	-0.519766	0.0112505	-0.192645	0.167975	0.0149558	0.951981	-0.400246	0.0468829	0.119521	0.471478	-0.50481	0.0256277	Bruton tyrosine kinase [Source:HGNC Symbol;Acc:HGNC:1133]
HFE	ENSG00000010704	4.06263	-0.562718	1.88949e-06	-0.501844	0.00342942	-0.623593	0.000348343	0.0995911	0.417898	0.160466	0.391419	0.0387165	0.841102	0.662309	1.16905e-06	-0.463127	0.0165015	homeostatic iron regulator [Source:HGNC Symbol;Acc:HGNC:4886]
SCMH1	ENSG00000010803	5.73109	0.169574	0.022852	0.241323	0.0301659	0.0978247	0.395617	-0.388526	7.53984e-08	-0.316777	0.00254146	-0.460276	1.14865e-05	-0.5581	7.93737e-11	-0.218952	0.0728744	Scm polycomb group protein homolog 1 [Source:HGNC Symbol;Acc:HGNC:19003]
FYN	ENSG00000010810	5.2144	-0.27367	0.0101321	-0.296814	0.0610136	-0.250526	0.117248	-0.576267	3.05255e-08	-0.59941	5.07001e-05	-0.553123	0.000266422	-0.302596	0.0129817	-0.849937	7.60506e-07	FYN proto-oncogene, Src family tyrosine kinase [Source:HGNC Symbol;Acc:HGNC:4037]
HIVEP2	ENSG00000010818	5.46503	-0.471972	1.53381e-06	-0.652761	3.66042e-06	-0.291183	0.0473318	-0.541726	2.06822e-08	-0.722515	1.28312e-07	-0.360936	0.0107531	-0.0697537	0.558627	-1.0137	3.68986e-10	HIVEP zinc finger 2 [Source:HGNC Symbol;Acc:HGNC:4921]
FMO1	ENSG00000010932	3.2334	-0.690779	0.000800019	-0.797477	0.00734068	-0.584081	0.0609308	-1.15156	1.79504e-08	-1.25826	9.01881e-06	-1.04487	0.000532508	-0.460785	0.0532967	-1.84234	7.71689e-08	flavin containing dimethylaniline monoxygenase 1 [Source:HGNC Symbol;Acc:HGNC:3769]
ELOA	ENSG00000011007	6.04644	0.0470939	0.454174	-0.00849027	0.938089	0.102678	0.246398	-0.268801	2.23105e-06	-0.324386	7.49692e-05	-0.213217	0.0103874	-0.315895	2.21511e-06	-0.221708	0.0195986	elongin A [Source:HGNC Symbol;Acc:HGNC:11620]
LYPLA2	ENSG00000011009	6.28976	0.474525	3.15235e-07	0.342101	0.0142175	0.606948	3.94925e-06	-0.347671	0.000125514	-0.480094	0.00023138	-0.215247	0.113996	-0.822196	6.13171e-14	0.126854	0.433863	lysophospholipase 2 [Source:HGNC Symbol;Acc:HGNC:6738]
CLCN6	ENSG00000011021	4.00557	-0.198685	0.0062118	-0.2664	0.0124596	-0.13097	0.237968	0.273077	0.000114416	0.205362	0.0564342	0.340792	0.000714639	0.471762	1.70422e-08	0.0743916	0.565023	chloride voltage-gated channel 6 [Source:HGNC Symbol;Acc:HGNC:2024]
MRC2	ENSG00000011028	7.33307	0.0937953	0.574368	0.458303	0.0483816	-0.270712	0.247384	-0.268839	0.0764625	0.0956685	0.708964	-0.633347	0.00392803	-0.362634	0.0386354	-0.175044	0.514454	mannose receptor C type 2 [Source:HGNC Symbol;Acc:HGNC:16875]
NME1-NME2	ENSG00000011052	0.270776	0.84959	6.79918e-06	0.29756	0.325453	1.40162	1.16301e-07	0.327568	0.0823348	-0.224462	0.450288	0.879599	0.000653847	-0.522022	0.0160877	1.17716	0.000126483	NME1-NME2 readthrough [Source:HGNC Symbol;Acc:HGNC:33531]
SLC6A7	ENSG00000011083	-2.20202	-0.0877848	0.709787	-0.059266	0.87491	-0.116304	0.745735	-0.958588	3.59849e-06	-0.930069	0.00145507	-0.987107	0.00140273	-0.870803	0.000303941	-1.04637	0.0022998	solute carrier family 6 member 7 [Source:HGNC Symbol;Acc:HGNC:11054]
TSPAN9	ENSG00000011105	6.48985	-0.142221	0.191397	-0.301524	0.0532978	0.0170819	0.925525	0.167838	0.110252	0.00853476	0.963837	0.327141	0.02709	0.310059	0.00991814	0.0256167	0.898786	tetraspanin 9 [Source:HGNC Symbol;Acc:HGNC:21640]
BTBD7	ENSG00000011114	5.47198	-0.605015	2.039e-14	-0.609097	3.59189e-08	-0.600934	1.34382e-07	0.133741	0.0823358	0.129659	0.276406	0.137822	0.224763	0.738756	6.85172e-16	-0.471275	0.000146826	BTB domain containing 7 [Source:HGNC Symbol;Acc:HGNC:18269]
APBA3	ENSG00000011132	3.92214	0.622845	1.39952e-12	0.876346	2.73228e-11	0.369344	0.0026955	-0.0702682	0.43319	0.183233	0.162409	-0.323769	0.00872661	-0.693113	5.91352e-12	0.552576	7.14451e-05	amyloid beta precursor protein binding family A member 3 [Source:HGNC Symbol;Acc:HGNC:580]
MKS1	ENSG00000011143	4.33674	0.21355	0.0170471	-0.122273	0.391645	0.549372	1.29544e-05	0.38096	1.13466e-05	0.0451373	0.766661	0.716782	4.4863e-09	0.16741	0.105609	0.59451	3.44798e-05	MKS transition zone complex subunit 1 [Source:HGNC Symbol;Acc:HGNC:7121]
ABHD5	ENSG00000011198	4.51816	-0.314383	0.000111935	-0.406919	0.000577012	-0.221848	0.0695518	-0.306439	0.000124672	-0.398974	0.000545946	-0.213904	0.0723775	0.00794444	0.93908	-0.620822	2.60601e-06	abhydrolase domain containing 5 [Source:HGNC Symbol;Acc:HGNC:21396]
ANOS1	ENSG00000011201	4.77755	-0.943471	3.8916e-08	-1.15957	1.57841e-06	-0.727373	0.00408608	0.910998	6.0522e-08	0.694901	0.0058905	1.12709	1.15093e-06	1.85447	1.08633e-18	-0.0324728	0.921756	anosmin 1 [Source:HGNC Symbol;Acc:HGNC:6211]
AKAP8L	ENSG00000011243	5.62669	0.426931	2.24323e-09	0.345962	0.00102595	0.5079	5.00276e-07	0.207885	0.00282312	0.126916	0.246016	0.288854	0.00363549	-0.219047	0.00714321	0.634816	3.80508e-08	A-kinase anchoring protein 8 like [Source:HGNC Symbol;Acc:HGNC:29857]
MBTD1	ENSG00000011258	5.26269	-0.190148	0.108812	-0.583438	0.000439327	0.203142	0.245612	0.164874	0.157189	-0.228415	0.189401	0.558164	0.000459227	0.355022	0.00736955	-0.0252737	0.909842	mbt domain containing 1 [Source:HGNC Symbol;Acc:HGNC:19866]
UTP18	ENSG00000011260	5.63442	0.134743	0.19198	-0.120496	0.453831	0.389982	0.00612186	-0.0479163	0.653781	-0.303155	0.0352737	0.207323	0.151672	-0.18266	0.114222	0.0868271	0.627685	UTP18 small subunit processome component [Source:HGNC Symbol;Acc:HGNC:24274]
RNF216	ENSG00000011275	6.0341	0.0377984	0.593608	-0.0271474	0.812016	0.102744	0.297479	-0.266671	2.10779e-05	-0.331617	0.000255662	-0.201726	0.0292564	-0.30447	3.49426e-05	-0.228873	0.0296433	ring finger protein 216 [Source:HGNC Symbol;Acc:HGNC:21698]
TTC19	ENSG00000011295	5.91436	-0.116004	0.176412	-0.101087	0.45079	-0.130921	0.306598	0.177627	0.0301316	0.192544	0.123248	0.16271	0.179003	0.29363	0.00193202	0.0616226	0.682177	tetratricopeptide repeat domain 19 [Source:HGNC Symbol;Acc:HGNC:26006]
PTBP1	ENSG00000011304	8.25153	0.340737	1.4148e-09	0.274547	0.000918788	0.406927	3.54718e-07	-0.0704732	0.215649	-0.136663	0.100547	-0.00428314	0.964042	-0.41121	2.40381e-10	0.270264	0.00286214	polypyrimidine tract binding protein 1 [Source:HGNC Symbol;Acc:HGNC:9583]
DPF1	ENSG00000011332	0.168713	0.321447	0.069098	-0.148724	0.607878	0.791618	0.00123394	-0.575554	0.000699552	-1.04573	1.27201e-05	-0.105383	0.703605	-0.897001	7.23717e-06	-0.254107	0.398194	double PHD fingers 1 [Source:HGNC Symbol;Acc:HGNC:20225]
SYT7	ENSG00000011347	6.68509	0.436288	0.00424855	0.387579	0.0995447	0.484997	0.0272968	0.750437	5.31102e-07	0.701728	0.00177303	0.799146	0.000127579	0.314149	0.0753626	1.18673	1.81721e-06	synaptotagmin 7 [Source:HGNC Symbol;Acc:HGNC:11514]
LARS2	ENSG00000011376	4.78762	-0.147892	0.0429614	-0.31741	0.00243809	0.0216269	0.86101	-0.0241761	0.758854	-0.193695	0.067217	0.145343	0.167717	0.123716	0.141299	-0.172068	0.153744	leucyl-tRNA synthetase 2, mitochondrial [Source:HGNC Symbol;Acc:HGNC:17095]
PIK3C2A	ENSG00000011405	6.28118	-0.708793	1.33901e-12	-0.785773	2.03855e-08	-0.631813	1.2345e-05	0.42125	1.06433e-05	0.344269	0.0169363	0.49823	0.00022884	1.13004	3.78424e-21	-0.287543	0.07595	phosphatidylinositol-4-phosphate 3-kinase catalytic subunit type 2 alpha [Source:HGNC Symbol;Acc:HGNC:8971]
PLAUR	ENSG00000011422	5.67028	0.308695	0.00911442	0.487433	0.0059203	0.129958	0.48575	-0.992848	1.04627e-16	-0.814111	6.26164e-07	-1.17159	1.92041e-11	-1.30154	1.24866e-19	-0.684153	0.000330521	plasminogen activator, urokinase receptor [Source:HGNC Symbol;Acc:HGNC:9053]
ANLN	ENSG00000011426	6.05769	0.211627	0.123815	-0.00800201	0.976508	0.431256	0.0254839	-1.7193	1.68371e-31	-1.93893	1.09552e-23	-1.49967	1.27269e-13	-1.93093	3.97542e-29	-1.50768	1.2807e-11	anillin actin binding protein [Source:HGNC Symbol;Acc:HGNC:14082]
WIZ	ENSG00000011451	6.29415	0.422887	1.79523e-08	0.3609	0.00117923	0.484874	5.22072e-06	-0.267498	0.000254625	-0.329485	0.00195005	-0.20551	0.0585173	-0.690384	6.42026e-15	0.155389	0.219961	WIZ zinc finger [Source:HGNC Symbol;Acc:HGNC:30917]
RABGAP1	ENSG00000011454	6.37091	-0.174874	0.0091119	-0.302189	0.00187428	-0.0475598	0.667694	-0.00801757	0.916057	-0.135332	0.179876	0.119297	0.226568	0.166857	0.0303775	-0.182892	0.0995648	RAB GTPase activating protein 1 [Source:HGNC Symbol;Acc:HGNC:17155]
DCN	ENSG00000011465	9.05981	-0.868037	7.46226e-08	-0.827887	0.000305469	-0.908186	0.00014605	0.502195	0.00141836	0.542345	0.0230216	0.462046	0.041649	1.37023	6.91633e-13	-0.365841	0.174539	decorin [Source:HGNC Symbol;Acc:HGNC:2705]
QPCTL	ENSG00000011478	4.08619	0.449177	4.4038e-05	0.477595	0.00388317	0.420759	0.00782869	-0.16453	0.138989	-0.136112	0.434561	-0.192948	0.242445	-0.613707	1.31605e-06	0.284647	0.122059	glutaminyl-peptide cyclotransferase like [Source:HGNC Symbol;Acc:HGNC:25952]
PPP5C	ENSG00000011485	6.00379	0.363712	3.06134e-08	0.191123	0.0546282	0.536302	1.10257e-08	-0.175253	0.00653889	-0.347843	0.000166441	-0.00266356	0.981163	-0.538966	2.1294e-12	0.188459	0.0830195	protein phosphatase 5 catalytic subunit [Source:HGNC Symbol;Acc:HGNC:9322]
CEP68	ENSG00000011523	5.168	-0.192373	0.00234496	-0.204577	0.0296101	-0.180168	0.0558074	0.292576	2.23636e-06	0.280372	0.00227941	0.30478	0.000536518	0.484948	4.70665e-11	0.100203	0.359429	centrosomal protein 68 [Source:HGNC Symbol;Acc:HGNC:29076]
MAP4K3	ENSG00000011566	5.5118	-0.428567	5.02637e-08	-0.49279	1.29274e-05	-0.364345	0.00152305	0.207694	0.00719075	0.143472	0.235163	0.271917	0.01407	0.636261	4.53859e-12	-0.220873	0.0902447	mitogen-activated protein kinase kinase kinase kinase 3 [Source:HGNC Symbol;Acc:HGNC:6865]
ZBTB32	ENSG00000011590	0.157663	0.0319584	0.876003	-0.0699304	0.821303	0.133847	0.639455	-0.677379	7.29823e-05	-0.779268	0.00143557	-0.57549	0.0235363	-0.709338	0.00039268	-0.645421	0.0238315	zinc finger and BTB domain containing 32 [Source:HGNC Symbol;Acc:HGNC:16763]
TYROBP	ENSG00000011600	5.75011	0.2248	0.132854	0.550538	0.0122049	-0.100938	0.675929	-0.132734	0.376379	0.193004	0.40167	-0.458472	0.0296601	-0.357534	0.0326256	0.0920665	0.729861	transmembrane immune signaling adaptor TYROBP [Source:HGNC Symbol;Acc:HGNC:12449]
TMEM159	ENSG00000011638	5.73916	-0.0775234	0.479302	-0.0387333	0.830339	-0.116313	0.46859	-0.315114	0.001445	-0.276324	0.0616286	-0.353904	0.014969	-0.237591	0.0417082	-0.392638	0.0172582	transmembrane protein 159 [Source:HGNC Symbol;Acc:HGNC:30136]
GABRA3	ENSG00000011677	0.678685	-0.225254	0.654805	-0.152578	0.85024	-0.297931	0.69608	-1.41737	0.00177316	-1.3447	0.0366978	-1.49005	0.0311646	-1.19212	0.0239368	-1.64263	0.0304692	gamma-aminobutyric acid type A receptor subunit alpha3 [Source:HGNC Symbol;Acc:HGNC:4077]
BRCA1	ENSG00000012048	4.43506	-0.267868	0.056287	-0.492025	0.0146969	-0.0437097	0.853345	-0.185226	0.185089	-0.409384	0.0403878	0.0389319	0.864351	0.0826416	0.622316	-0.453094	0.0458593	BRCA1 DNA repair associated [Source:HGNC Symbol;Acc:HGNC:1100]
ERCC1	ENSG00000012061	5.97337	0.229929	0.00632642	0.370844	0.0030694	0.0890147	0.50533	0.0967141	0.259372	0.237629	0.0572857	-0.0442006	0.74319	-0.133215	0.176047	0.326643	0.0172574	ERCC excision repair 1, endonuclease non-catalytic subunit [Source:HGNC Symbol;Acc:HGNC:3433]
CD22	ENSG00000012124	3.4709	0.156767	0.542344	0.453969	0.223383	-0.140436	0.720847	1.15579	6.95076e-07	1.45299	4.3859e-05	0.858585	0.00825022	0.999021	0.000223993	1.31255	0.000651591	CD22 molecule [Source:HGNC Symbol;Acc:HGNC:1643]
SEMA3B	ENSG00000012171	4.8929	0.0439319	0.869079	-0.103576	0.794567	0.19144	0.600874	2.24536	4.95575e-20	2.09785	4.02896e-09	2.39287	2.79591e-14	2.20143	3.38916e-15	2.28929	3.19512e-09	semaphorin 3B [Source:HGNC Symbol;Acc:HGNC:10724]
MBTPS2	ENSG00000012174	5.13346	-0.392755	1.60549e-05	-0.604868	3.98802e-06	-0.180642	0.194909	0.120179	0.195391	-0.0919341	0.532576	0.332292	0.00964584	0.512934	1.07458e-06	-0.272576	0.0715242	membrane bound transcription factor peptidase, site 2 [Source:HGNC Symbol;Acc:HGNC:15455]
PRICKLE3	ENSG00000012211	3.43947	0.374344	1.3193e-05	0.338012	0.00892711	0.410677	0.00082354	-0.161359	0.0606564	-0.197692	0.124277	-0.125027	0.337793	-0.535704	7.14036e-08	0.212985	0.139848	prickle planar cell polarity protein 3 [Source:HGNC Symbol;Acc:HGNC:6645]
LTF	ENSG00000012223	10.2247	-2.11254	3.21406e-07	-0.943835	0.108261	-3.28125	1.08659e-06	-1.05081	0.00738492	0.117904	0.864297	-2.21951	0.000301103	1.06174	0.0206623	-3.16335	4.20748e-06	lactotransferrin [Source:HGNC Symbol;Acc:HGNC:6720]
EXTL3	ENSG00000012232	5.58105	-0.0682908	0.457863	0.143134	0.289836	-0.279715	0.0263097	-0.577756	7.28323e-12	-0.366331	0.0024134	-0.789181	1.63223e-10	-0.509465	1.94028e-07	-0.646047	2.57918e-06	exostosin like glycosyltransferase 3 [Source:HGNC Symbol;Acc:HGNC:3518]
ELOVL5	ENSG00000012660	8.1374	-0.757295	4.94947e-09	-0.839826	4.54794e-06	-0.674764	0.000373393	1.09545	6.36867e-17	1.01292	1.00108e-07	1.17798	2.36459e-11	1.85274	4.8296e-29	0.338152	0.114096	ELOVL fatty acid elongase 5 [Source:HGNC Symbol;Acc:HGNC:21308]
ALOX5	ENSG00000012779	4.55045	-0.341368	0.0101064	0.112102	0.615886	-0.794838	5.0575e-05	-0.0991758	0.473019	0.354294	0.0741132	-0.552646	0.0037111	0.242193	0.115599	-0.440544	0.0426689	arachidonate 5-lipoxygenase [Source:HGNC Symbol;Acc:HGNC:435]
CALCOCO1	ENSG00000012822	6.10936	-0.13734	0.0493913	-0.116312	0.282591	-0.158367	0.126352	0.718115	9.44531e-24	0.739142	3.87407e-13	0.697087	3.23198e-13	0.855454	5.38486e-24	0.580775	1.89583e-07	calcium binding and coiled-coil domain 1 [Source:HGNC Symbol;Acc:HGNC:29306]
UBR7	ENSG00000012963	6.00716	-0.357969	9.26043e-06	-0.533385	4.67177e-06	-0.182554	0.135726	0.266951	0.000766619	0.0915352	0.481689	0.442366	7.82995e-05	0.62492	3.86646e-11	-0.0910187	0.526251	ubiquitin protein ligase E3 component n-recognin 7 [Source:HGNC Symbol;Acc:HGNC:20344]
MAP4K5	ENSG00000012983	5.82862	-0.347938	3.19445e-06	-0.322593	0.00314144	-0.373284	0.000658432	-0.195194	0.00815705	-0.169849	0.129649	-0.22054	0.0420776	0.152744	0.0794955	-0.543133	7.16633e-06	mitogen-activated protein kinase kinase kinase kinase 5 [Source:HGNC Symbol;Acc:HGNC:6867]
EHD3	ENSG00000013016	4.23497	-0.129212	0.231748	-0.264495	0.089835	0.00607155	0.973787	0.262938	0.00985919	0.127655	0.43884	0.398222	0.00588141	0.39215	0.000935332	0.133727	0.46049	EH domain containing 3 [Source:HGNC Symbol;Acc:HGNC:3244]
PSMC4	ENSG00000013275	6.82453	0.517478	1.435e-08	0.46559	0.00058505	0.569366	9.97092e-06	-0.303856	0.000629266	-0.355744	0.00609351	-0.251968	0.0562591	-0.821334	2.11944e-14	0.213622	0.161343	proteasome 26S subunit, ATPase 4 [Source:HGNC Symbol;Acc:HGNC:9551]
MAN2B2	ENSG00000013288	6.27037	-0.276155	0.00105981	-0.461686	0.000154327	-0.0906244	0.503253	0.706694	1.40006e-16	0.521163	2.12145e-05	0.892225	3.43859e-14	0.982849	1.86864e-21	0.430539	0.00167375	mannosidase alpha class 2B member 2 [Source:HGNC Symbol;Acc:HGNC:29623]
CLDN11	ENSG00000013297	3.0094	-0.0587633	0.796236	0.638423	0.0367301	-0.75595	0.011239	0.480114	0.0146752	1.1773	7.58061e-05	-0.217072	0.48031	0.538878	0.0187732	0.421351	0.21057	claudin 11 [Source:HGNC Symbol;Acc:HGNC:8514]
SLC25A39	ENSG00000013306	7.46824	0.794979	5.02837e-15	0.610635	3.1656e-05	0.979323	3.36719e-12	-0.145604	0.140897	-0.329948	0.0195498	0.0387403	0.807813	-0.940582	8.34584e-16	0.649375	4.23319e-05	solute carrier family 25 member 39 [Source:HGNC Symbol;Acc:HGNC:24279]
MVP	ENSG00000013364	7.41379	0.0647259	0.613966	0.061613	0.761092	0.0678388	0.725814	0.449969	7.3441e-05	0.446856	0.00886692	0.453082	0.00511616	0.385243	0.0038067	0.514695	0.00637609	major vault protein [Source:HGNC Symbol;Acc:HGNC:7531]
NUB1	ENSG00000013374	6.52429	0.162685	0.0235217	0.304252	0.00408646	0.0211184	0.862474	-0.23354	0.000786341	-0.0919734	0.411405	-0.375107	0.000205606	-0.396225	1.21911e-06	-0.070855	0.577337	negative regulator of ubiquitin like proteins 1 [Source:HGNC Symbol;Acc:HGNC:17623]
PGM3	ENSG00000013375	5.81742	-0.362635	3.81752e-06	-0.289087	0.0126011	-0.436182	0.000153105	-0.320347	3.10936e-05	-0.246799	0.0309269	-0.393894	0.000445146	0.0422882	0.661422	-0.682981	9.35484e-08	phosphoglucomutase 3 [Source:HGNC Symbol;Acc:HGNC:8907]
RWDD2A	ENSG00000013392	3.27699	-0.222956	0.00892067	-0.168189	0.200922	-0.277722	0.0271981	0.286401	0.000568588	0.341167	0.00600627	0.231635	0.0564385	0.509357	1.92678e-07	0.0634453	0.68157	RWD domain containing 2A [Source:HGNC Symbol;Acc:HGNC:21385]
CLK1	ENSG00000013441	6.15437	-0.13449	0.123782	-0.0344024	0.820374	-0.234577	0.0641584	0.499728	2.21381e-09	0.599815	1.11966e-06	0.399641	0.000688088	0.634217	1.36453e-10	0.365238	0.00810707	CDC like kinase 1 [Source:HGNC Symbol;Acc:HGNC:2068]
POLR3B	ENSG00000013503	4.06646	-0.302709	2.09456e-05	-0.479961	3.0851e-06	-0.125457	0.253069	-0.211294	0.00257512	-0.388546	0.000111051	-0.0340416	0.767697	0.0914152	0.279699	-0.514003	8.2968e-06	RNA polymerase III subunit B [Source:HGNC Symbol;Acc:HGNC:30348]
ANGEL1	ENSG00000013523	4.81556	-0.195344	0.00778085	-0.26715	0.0130988	-0.123538	0.272747	0.152067	0.036216	0.0802603	0.495086	0.223873	0.0312198	0.347411	3.38741e-05	-0.0432773	0.748418	angel homolog 1 [Source:HGNC Symbol;Acc:HGNC:19961]
RNF14	ENSG00000013561	6.11603	-0.104661	0.168444	-0.26065	0.01582	0.0513283	0.672246	0.468413	9.89134e-11	0.312424	0.00341495	0.624402	6.86399e-10	0.573073	2.0663e-11	0.363752	0.00217321	ring finger protein 14 [Source:HGNC Symbol;Acc:HGNC:10058]
DNASE1L1	ENSG00000013563	4.39532	0.163708	0.0583672	0.0924744	0.510074	0.234941	0.0596432	0.0321124	0.728611	-0.0391211	0.788163	0.103346	0.42168	-0.131596	0.186756	0.19582	0.170086	deoxyribonuclease 1 like 1 [Source:HGNC Symbol;Acc:HGNC:2957]
DDX11	ENSG00000013573	4.85145	0.570703	6.29361e-08	0.341009	0.0323839	0.800398	8.0959e-08	-0.605257	4.9701e-09	-0.834952	1.10065e-08	-0.375563	0.0131557	-1.17596	4.2002e-20	-0.0345541	0.863313	DEAD/H-box helicase 11 [Source:HGNC Symbol;Acc:HGNC:2736]
HEBP1	ENSG00000013583	6.38879	0.469121	0.000351898	0.239607	0.250412	0.698636	0.000166747	1.29983	3.1528e-21	1.07032	4.43535e-08	1.52935	7.82835e-17	0.83071	5.02489e-08	1.76895	3.59313e-15	heme binding protein 1 [Source:HGNC Symbol;Acc:HGNC:17176]
GPRC5A	ENSG00000013588	8.35428	-0.520479	0.0097527	-1.20133	2.36121e-05	0.160371	0.621672	0.778931	7.55124e-05	0.0980812	0.775442	1.45978	8.03954e-08	1.29941	2.88722e-08	0.258452	0.461229	G protein-coupled receptor class C group 5 member A [Source:HGNC Symbol;Acc:HGNC:9836]
MAMLD1	ENSG00000013619	3.45829	0.33269	0.0481442	0.0202201	0.948798	0.645159	0.00625855	-1.60419	2.38312e-20	-1.91666	1.83409e-16	-1.29172	1.28263e-07	-1.93688	6.60497e-21	-1.2715	2.54592e-06	mastermind like domain containing 1 [Source:HGNC Symbol;Acc:HGNC:2568]
CD6	ENSG00000013725	3.66014	0.0889651	0.656549	0.260988	0.370492	-0.0830576	0.78538	-0.568849	0.00127277	-0.396826	0.1374	-0.740872	0.00462828	-0.657814	0.00144532	-0.479884	0.10939	CD6 molecule [Source:HGNC Symbol;Acc:HGNC:1691]
TACC3	ENSG00000013810	5.97554	0.863953	3.83252e-13	0.750669	1.63313e-05	0.977238	2.90542e-09	-0.680273	2.50391e-09	-0.793558	7.74505e-07	-0.566988	0.000638413	-1.54423	3.48556e-26	0.183681	0.358262	transforming acidic coiled-coil containing protein 3 [Source:HGNC Symbol;Acc:HGNC:11524]
UFL1	ENSG00000014123	5.74356	-0.534379	3.07426e-10	-0.530772	1.12483e-05	-0.537985	1.37739e-05	0.117155	0.168738	0.120761	0.360498	0.113548	0.369939	0.651533	3.2128e-11	-0.417224	0.00217607	UFM1 specific ligase 1 [Source:HGNC Symbol;Acc:HGNC:23039]
POLA2	ENSG00000014138	4.88616	0.432911	1.24577e-07	0.341575	0.0051902	0.524247	6.48327e-06	-0.400632	5.55645e-07	-0.491968	1.72001e-05	-0.309295	0.00834592	-0.833543	1.80036e-17	0.0322791	0.834025	DNA polymerase alpha 2, accessory subunit [Source:HGNC Symbol;Acc:HGNC:30073]
ZC3H3	ENSG00000014164	5.44665	1.33854	6.07906e-52	1.23354	1.53342e-25	1.44353	1.17463e-37	0.0561114	0.461155	-0.0488855	0.687867	0.161108	0.128018	-1.28243	7.11254e-40	1.39465	4.56616e-27	zinc finger CCCH-type containing 3 [Source:HGNC Symbol;Acc:HGNC:28972]
CAPN1	ENSG00000014216	7.93609	0.366406	7.42014e-05	0.377837	0.00660672	0.354974	0.00779073	-0.191942	0.0372569	-0.18051	0.198784	-0.203373	0.137065	-0.558347	1.78211e-07	0.174464	0.270284	calpain 1 [Source:HGNC Symbol;Acc:HGNC:1476]
ACP3	ENSG00000014257	1.44387	-0.795961	3.32969e-05	-1.57103	7.77729e-09	-0.0208883	0.950482	-0.267829	0.167555	-1.0429	8.4487e-05	0.507243	0.0627684	0.528131	0.0169424	-1.06379	0.000649098	acid phosphatase 3 [Source:HGNC Symbol;Acc:HGNC:125]
MDH1	ENSG00000014641	7.28927	0.101171	0.181308	0.0448532	0.721458	0.157488	0.148232	-0.625438	2.02195e-17	-0.681756	2.41589e-11	-0.569121	4.66702e-08	-0.726609	6.14338e-17	-0.524268	8.07217e-06	malate dehydrogenase 1 [Source:HGNC Symbol;Acc:HGNC:6970]
SLC30A9	ENSG00000014824	6.41776	-0.124071	0.110232	-0.165094	0.154165	-0.0830467	0.49113	0.370433	5.41234e-07	0.329409	0.0027383	0.411457	8.21239e-05	0.494503	1.46053e-08	0.246362	0.0476546	solute carrier family 30 member 9 [Source:HGNC Symbol;Acc:HGNC:1329]
MTMR11	ENSG00000014914	4.22633	0.139837	0.305545	0.65727	0.00069994	-0.377595	0.0507903	-0.27675	0.0305276	0.240682	0.22644	-0.794182	1.99705e-05	-0.416587	0.00490914	-0.136912	0.551026	myotubularin related protein 11 [Source:HGNC Symbol;Acc:HGNC:24307]
COX15	ENSG00000014919	5.49861	-0.161722	0.0052209	-0.287312	0.000613658	-0.0361308	0.707995	0.18939	0.00081243	0.0637988	0.492237	0.31498	8.51166e-05	0.351111	1.31181e-07	0.0276681	0.797832	cytochrome c oxidase assembly homolog COX15 [Source:HGNC Symbol;Acc:HGNC:2263]
CCDC88C	ENSG00000015133	6.09071	0.0889204	0.424079	0.00705981	0.972934	0.170781	0.278956	0.53873	1.09865e-07	0.456869	0.00250839	0.62059	1.24506e-05	0.449809	0.000146275	0.62765	0.000174749	coiled-coil domain containing 88C [Source:HGNC Symbol;Acc:HGNC:19967]
YAF2	ENSG00000015153	4.05599	-0.341994	1.46954e-06	-0.329948	0.00142729	-0.354039	0.000666168	0.107062	0.136057	0.119107	0.280712	0.0950162	0.376695	0.449055	4.63453e-08	-0.234932	0.0449988	YY1 associated factor 2 [Source:HGNC Symbol;Acc:HGNC:17363]
ZMYND11	ENSG00000015171	7.11313	-0.0704508	0.399907	0.0778962	0.549509	-0.218798	0.0602004	0.135025	0.083922	0.283372	0.013312	-0.0133218	0.918632	0.205476	0.02229	0.0645745	0.647264	zinc finger MYND-type containing 11 [Source:HGNC Symbol;Acc:HGNC:16966]
WAS	ENSG00000015285	3.71626	0.296677	0.0508279	0.497996	0.0285122	0.0953585	0.700413	-0.199175	0.188382	0.00214398	0.993699	-0.400493	0.0668777	-0.495852	0.00380446	0.0975025	0.722063	WASP actin nucleation promoting factor [Source:HGNC Symbol;Acc:HGNC:12731]
DPEP1	ENSG00000015413	0.749064	0.129733	0.595056	0.0671018	0.867454	0.192364	0.589954	0.0719353	0.767169	0.00930397	0.981663	0.134567	0.701895	-0.0577979	0.834985	0.201668	0.613446	dipeptidase 1 [Source:HGNC Symbol;Acc:HGNC:3002]
BID	ENSG00000015475	5.03592	0.370043	8.50246e-06	0.321005	0.0102428	0.41908	0.000407633	-0.72026	1.5293e-17	-0.769298	4.20579e-11	-0.671222	2.14238e-08	-1.0903	8.31401e-26	-0.350217	0.00980735	BH3 interacting domain death agonist [Source:HGNC Symbol;Acc:HGNC:1050]
MATR3	ENSG00000015479	3.12184	-1.3554	4.05777e-16	-1.42303	2.7498e-10	-1.28778	1.00149e-07	0.653619	2.45422e-05	0.585991	0.0123567	0.721248	0.000931841	2.00902	1.08288e-23	-0.701785	0.00634707	matrin 3 [Source:HGNC Symbol;Acc:HGNC:6912]
NPC1L1	ENSG00000015520	0.697743	-0.370609	0.200488	-1.86062	2.49176e-06	1.1194	0.0042759	1.10772	5.90078e-05	-0.382292	0.375206	2.59773	1.44511e-11	1.47833	6.06374e-06	0.737111	0.113157	NPC1 like intracellular cholesterol transporter 1 [Source:HGNC Symbol;Acc:HGNC:7898]
XYLT2	ENSG00000015532	5.48957	0.161549	0.115951	-0.185989	0.231168	0.509087	0.00032024	0.543209	3.07329e-08	0.195671	0.201362	0.890748	9.17978e-11	0.38166	0.000848052	0.704758	1.2869e-05	xylosyltransferase 2 [Source:HGNC Symbol;Acc:HGNC:15517]
STMN4	ENSG00000015592	-1.16125	0.715202	0.0521847	-0.569547	0.314496	1.99995	4.81561e-05	1.93789	9.9059e-08	0.653141	0.245006	3.22264	7.89854e-11	1.22269	0.00349692	2.65309	1.17764e-05	stathmin 4 [Source:HGNC Symbol;Acc:HGNC:16078]
NUDCD3	ENSG00000015676	6.90358	0.109555	0.104415	-0.0165654	0.890627	0.235675	0.0130809	0.170228	0.00842741	0.0441084	0.688495	0.296348	0.00120288	0.0606738	0.44105	0.279783	0.00876	NudC domain containing 3 [Source:HGNC Symbol;Acc:HGNC:22208]
ISL1	ENSG00000016082	-1.64605	0.0627707	0.879508	-0.0991882	0.877185	0.22473	0.706935	-1.55895	1.21281e-05	-1.72091	0.000497559	-1.39699	0.00903449	-1.62172	9.61634e-05	-1.49618	0.0113636	ISL LIM homeobox 1 [Source:HGNC Symbol;Acc:HGNC:6132]
CHDH	ENSG00000016391	5.24274	0.290965	0.0224683	0.585204	0.00202659	-0.00327304	0.988474	0.656764	1.19491e-07	0.951002	3.28442e-07	0.362525	0.0429643	0.365798	0.0117045	0.947729	3.84034e-06	choline dehydrogenase [Source:HGNC Symbol;Acc:HGNC:24288]
IL20RA	ENSG00000016402	4.19369	-0.795814	0.00063758	-1.26946	0.000122315	-0.322164	0.379966	1.44599	7.04185e-10	0.972336	0.00535797	1.91964	1.43237e-09	2.2418	5.55727e-15	0.650172	0.093531	interleukin 20 receptor subunit alpha [Source:HGNC Symbol;Acc:HGNC:6003]
CLCA4	ENSG00000016602	-0.769935	0.00478962	0.990576	-0.135232	0.822616	0.144812	0.80013	-0.337293	0.334603	-0.477315	0.361344	-0.197271	0.718115	-0.342083	0.399482	-0.332503	0.584353	chloride channel accessory 4 [Source:HGNC Symbol;Acc:HGNC:2018]
GLT8D1	ENSG00000016864	5.82298	-0.0755234	0.196113	-0.0538164	0.564753	-0.0972304	0.25888	0.331239	1.92409e-09	0.352946	1.22964e-05	0.309532	6.96091e-05	0.406762	4.10841e-10	0.255716	0.00497771	glycosyltransferase 8 domain containing 1 [Source:HGNC Symbol;Acc:HGNC:24870]
ATP2C1	ENSG00000017260	7.4151	-0.171478	0.0210193	-0.156687	0.166454	-0.186268	0.0915698	-0.548891	7.93758e-14	-0.534101	2.04944e-07	-0.563682	8.55814e-08	-0.377414	7.80727e-06	-0.720369	2.04559e-09	ATPase secretory pathway Ca2+ transporting 1 [Source:HGNC Symbol;Acc:HGNC:13211]
IGF1	ENSG00000017427	1.51376	-1.04894	4.77842e-08	-0.917297	0.000731678	-1.18059	3.97074e-05	0.668987	0.000337152	0.800635	0.00458849	0.53734	0.0458628	1.71793	6.60566e-14	-0.379957	0.238586	insulin like growth factor 1 [Source:HGNC Symbol;Acc:HGNC:5464]
SLC38A5	ENSG00000017483	3.36276	0.361962	0.052064	0.539731	0.0548923	0.184193	0.527739	-0.75961	2.3093e-05	-0.581841	0.0266973	-0.937379	0.000435787	-1.12157	1.31731e-07	-0.397648	0.197516	solute carrier family 38 member 5 [Source:HGNC Symbol;Acc:HGNC:18070]
RALBP1	ENSG00000017797	6.73322	0.247018	0.003932	0.408031	0.00136054	0.086006	0.529648	-0.314813	0.000164842	-0.153801	0.237991	-0.475826	9.48064e-05	-0.561832	1.31073e-08	-0.0677948	0.662168	ralA binding protein 1 [Source:HGNC Symbol;Acc:HGNC:9841]
RUFY3	ENSG00000018189	5.19131	-0.339677	6.75765e-05	-0.313536	0.012741	-0.365818	0.00359062	-0.0788485	0.373565	-0.0527078	0.71446	-0.104989	0.421541	0.260829	0.00799347	-0.418525	0.00254136	RUN and FYVE domain containing 3 [Source:HGNC Symbol;Acc:HGNC:30285]
CNTN1	ENSG00000018236	4.01276	-1.11718	7.30442e-06	-1.18893	0.00071937	-1.04544	0.00515958	-0.561173	0.0218414	-0.632921	0.0783388	-0.489425	0.18668	0.556012	0.0522539	-1.67836	3.77519e-05	contactin 1 [Source:HGNC Symbol;Acc:HGNC:2171]
SLC11A1	ENSG00000018280	3.18888	0.228165	0.125907	0.38912	0.0804087	0.06721	0.78315	-0.675966	1.86653e-06	-0.515011	0.0126322	-0.836921	6.34859e-05	-0.904131	6.79614e-08	-0.447801	0.0609975	solute carrier family 11 member 1 [Source:HGNC Symbol;Acc:HGNC:10907]
WWTR1	ENSG00000018408	6.70001	-0.339376	0.00112455	-0.0293277	0.877223	-0.649424	2.57296e-05	-0.970522	1.36038e-19	-0.660474	5.5293e-06	-1.28057	5.17598e-16	-0.631146	1.60087e-07	-1.3099	6.80584e-14	WW domain containing transcription regulator 1 [Source:HGNC Symbol;Acc:HGNC:24042]
AGPS	ENSG00000018510	5.83628	-0.54412	1.18446e-06	-0.375219	0.0233449	-0.71302	1.77951e-05	0.159159	0.160373	0.328059	0.0496752	-0.00974187	0.959068	0.703278	5.84608e-08	-0.384961	0.0366194	alkylglycerone phosphate synthase [Source:HGNC Symbol;Acc:HGNC:327]
CXorf56	ENSG00000018610	4.89383	0.078925	0.247476	0.0198627	0.866263	0.137987	0.157563	-0.36763	8.73795e-09	-0.426692	2.85943e-06	-0.308567	0.000854022	-0.446555	3.0379e-09	-0.288705	0.00629101	chromosome X open reading frame 56 [Source:HGNC Symbol;Acc:HGNC:26239]
ATP1A2	ENSG00000018625	1.31951	-1.23127	5.4096e-07	-1.60316	3.15016e-06	-0.85938	0.0189139	1.62373	4.86386e-11	1.25184	0.000615755	1.99562	1.72425e-09	2.855	6.95964e-20	0.392456	0.348354	ATPase Na+/K+ transporting subunit alpha 2 [Source:HGNC Symbol;Acc:HGNC:800]
TTC27	ENSG00000018699	4.86427	0.067561	0.351988	-0.0431844	0.712756	0.178306	0.0764199	-0.304171	4.83984e-06	-0.414916	1.39675e-05	-0.193425	0.0500117	-0.371732	2.00612e-06	-0.23661	0.0343005	tetratricopeptide repeat domain 27 [Source:HGNC Symbol;Acc:HGNC:25986]
ZNF582	ENSG00000018869	1.7343	-0.414659	0.000533064	-0.433515	0.0137888	-0.395803	0.0266281	0.598695	3.78263e-07	0.579839	0.000974489	0.617551	0.000190677	1.01335	8.87709e-13	0.184036	0.376372	zinc finger protein 582 [Source:HGNC Symbol;Acc:HGNC:26421]
VSIG2	ENSG00000019102	2.14132	-0.732682	0.0156531	-0.772187	0.0829853	-0.693177	0.132401	1.30437	1.23075e-05	1.26487	0.00557695	1.34388	0.00103442	2.03705	1.34202e-08	0.571689	0.263426	V-set and immunoglobulin domain containing 2 [Source:HGNC Symbol;Acc:HGNC:17149]
PHLDB1	ENSG00000019144	6.17492	-0.265781	0.00607691	-0.194332	0.193028	-0.337229	0.0182966	0.141837	0.145911	0.213285	0.146384	0.070389	0.643316	0.407618	0.00023119	-0.123943	0.464509	pleckstrin homology like domain family B member 1 [Source:HGNC Symbol;Acc:HGNC:23697]
MARCO	ENSG00000019169	3.58836	1.01099	0.000288363	1.97431	7.79902e-06	0.0476719	0.921341	-2.8519	1.70946e-20	-1.88859	6.54143e-07	-3.81522	1.99891e-15	-3.86289	1.8145e-24	-1.84091	5.91684e-05	macrophage receptor with collagenous structure [Source:HGNC Symbol;Acc:HGNC:6895]
CYP24A1	ENSG00000019186	1.90897	-2.37333	2.86321e-08	-0.56035	0.375751	-4.1863	8.75947e-09	-1.23509	0.00204657	0.577883	0.36677	-3.04807	3.29493e-06	1.13823	0.0144718	-3.60842	4.75336e-07	cytochrome P450 family 24 subfamily A member 1 [Source:HGNC Symbol;Acc:HGNC:2602]
PRDM11	ENSG00000019485	3.42897	-0.138148	0.176225	-0.138336	0.380061	-0.137961	0.370735	-0.113984	0.256389	-0.114171	0.465178	-0.113796	0.450632	0.0241649	0.844964	-0.252132	0.124588	PR/SET domain 11 [Source:HGNC Symbol;Acc:HGNC:13996]
SYT13	ENSG00000019505	6.02522	-0.596137	0.144906	-1.57468	0.00525017	0.38241	0.541357	1.62661	4.32841e-05	0.648062	0.300791	2.60516	1.36355e-06	2.22275	2.63207e-06	1.03047	0.121186	synaptotagmin 13 [Source:HGNC Symbol;Acc:HGNC:14962]
SNAI2	ENSG00000019549	4.74406	-0.0795345	0.650216	0.359937	0.143156	-0.519005	0.0278085	-0.75676	1.0335e-06	-0.317289	0.180426	-1.19623	2.5222e-07	-0.677226	0.000183605	-0.836295	0.00109277	snail family transcriptional repressor 2 [Source:HGNC Symbol;Acc:HGNC:11094]
CD74	ENSG00000019582	11.0709	-0.00405613	0.983319	0.215066	0.413041	-0.223179	0.378314	-0.235471	0.147291	-0.0163486	0.955105	-0.454594	0.0536661	-0.231415	0.222179	-0.239527	0.391296	CD74 molecule [Source:HGNC Symbol;Acc:HGNC:1697]
HGF	ENSG00000019991	2.70557	-0.95659	2.96078e-08	-0.629888	0.011371	-1.28329	8.49676e-07	0.723981	1.59035e-05	1.05068	3.43202e-05	0.397278	0.105867	1.68057	5.74283e-16	-0.23261	0.435631	hepatocyte growth factor [Source:HGNC Symbol;Acc:HGNC:4893]
ZRANB1	ENSG00000019995	4.57893	-0.36544	6.77029e-05	-0.314551	0.0207071	-0.416329	0.0020757	-0.154298	0.0947065	-0.103409	0.481333	-0.205187	0.13036	0.211142	0.0475449	-0.519738	0.000480609	zinc finger RANBP2-type containing 1 [Source:HGNC Symbol;Acc:HGNC:18224]
NCDN	ENSG00000020129	5.86484	0.638139	1.57592e-08	0.422388	0.0125337	0.85389	7.81021e-08	0.52022	2.19334e-06	0.304468	0.0699548	0.735971	1.68964e-06	-0.117919	0.378331	1.15836	4.11513e-10	neurochondrin [Source:HGNC Symbol;Acc:HGNC:17597]
ADGRA2	ENSG00000020181	5.06184	-0.317942	0.00833569	-0.0740925	0.719814	-0.561791	0.00150198	0.30554	0.00980221	0.54939	0.00179354	0.0616912	0.748546	0.623482	6.23669e-06	-0.0124013	0.958077	adhesion G protein-coupled receptor A2 [Source:HGNC Symbol;Acc:HGNC:17849]
ZFP64	ENSG00000020256	4.69889	0.214387	0.00195909	0.113247	0.305153	0.315527	0.00145486	-0.178186	0.00902875	-0.279326	0.00481216	-0.0770455	0.469813	-0.392573	8.28209e-07	0.0362015	0.778579	ZFP64 zinc finger protein [Source:HGNC Symbol;Acc:HGNC:15940]
MNAT1	ENSG00000020426	4.30365	-0.108772	0.184032	-0.343233	0.00274473	0.125688	0.298131	0.306858	6.68877e-05	0.0723977	0.574808	0.541319	6.01079e-07	0.415631	4.27868e-06	0.198086	0.132347	MNAT1 component of CDK activating kinase [Source:HGNC Symbol;Acc:HGNC:7181]
SAMD4A	ENSG00000020577	4.14138	-0.476511	0.000110711	-0.182859	0.352423	-0.770163	2.76215e-05	-0.688139	1.57322e-08	-0.394487	0.0270209	-0.981791	5.07974e-08	-0.211628	0.14298	-1.16465	9.60785e-09	sterile alpha motif domain containing 4A [Source:HGNC Symbol;Acc:HGNC:23023]
RUNX3	ENSG00000020633	4.77085	0.0533695	0.77145	0.449401	0.070225	-0.342662	0.164296	-1.45028	3.60864e-18	-1.05425	2.21933e-06	-1.84631	1.30716e-13	-1.50365	8.67899e-15	-1.39691	1.39242e-07	RUNX family transcription factor 3 [Source:HGNC Symbol;Acc:HGNC:10473]
MRE11	ENSG00000020922	5.06186	-0.0852834	0.252971	0.0548741	0.650932	-0.225441	0.0323236	-0.239641	0.00056927	-0.0994839	0.370559	-0.379799	0.000171183	-0.154358	0.0610009	-0.324925	0.00485831	MRE11 homolog, double strand break repair nuclease [Source:HGNC Symbol;Acc:HGNC:7230]
PLEKHB1	ENSG00000021300	5.18489	0.321898	0.157776	0.928432	0.00585911	-0.284635	0.414264	-0.934476	1.57051e-05	-0.327942	0.332598	-1.54101	2.77898e-06	-1.25637	8.95562e-07	-0.612577	0.0942706	pleckstrin homology domain containing B1 [Source:HGNC Symbol;Acc:HGNC:19079]
SERPINB1	ENSG00000021355	6.10322	-0.194848	0.0597525	-0.22601	0.145523	-0.163685	0.298383	0.321953	0.00122988	0.290791	0.0548971	0.353115	0.0134798	0.516801	9.48305e-06	0.127105	0.476785	serpin family B member 1 [Source:HGNC Symbol;Acc:HGNC:3311]
SLC7A9	ENSG00000021488	-0.876563	0.34817	0.0619859	0.164873	0.593837	0.531467	0.0451117	0.361089	0.0475207	0.177792	0.552567	0.544386	0.0345398	0.012919	0.955588	0.709259	0.0180525	solute carrier family 7 member 9 [Source:HGNC Symbol;Acc:HGNC:11067]
SPAST	ENSG00000021574	5.07682	-0.154137	0.0256869	-0.118184	0.270618	-0.19009	0.0621599	-0.348903	1.81558e-07	-0.31295	0.00124953	-0.384856	7.31692e-05	-0.194766	0.0131635	-0.50304	5.06674e-06	spastin [Source:HGNC Symbol;Acc:HGNC:11233]
NRXN3	ENSG00000021645	2.28296	-1.35017	5.11596e-09	-1.22896	0.000130921	-1.47137	2.1835e-05	1.53466	2.29041e-11	1.65587	1.59486e-06	1.41346	4.20575e-06	2.88483	1.28357e-22	0.184497	0.651459	neurexin 3 [Source:HGNC Symbol;Acc:HGNC:8010]
OSBPL5	ENSG00000021762	5.36185	-0.0881232	0.408939	-0.335728	0.0221265	0.159482	0.294608	0.11805	0.244174	-0.129555	0.406935	0.365655	0.00869202	0.206173	0.0739548	0.0299267	0.874415	oxysterol binding protein like 5 [Source:HGNC Symbol;Acc:HGNC:16392]
AQR	ENSG00000021776	6.14519	-0.492595	2.01622e-11	-0.622944	2.44805e-09	-0.362247	0.000622318	0.246751	0.000501745	0.116403	0.30175	0.377099	0.000174172	0.739346	1.62124e-17	-0.245844	0.0389707	aquarius intron-binding spliceosomal factor [Source:HGNC Symbol;Acc:HGNC:29513]
CPS1	ENSG00000021826	2.41404	-0.210596	0.382564	-0.878432	0.00702145	0.45724	0.173613	0.129178	0.591221	-0.538658	0.104409	0.797014	0.0110976	0.339774	0.200749	-0.0814176	0.84871	carbamoyl-phosphate synthase 1 [Source:HGNC Symbol;Acc:HGNC:2323]
FHL1	ENSG00000022267	5.27705	-0.558527	0.00219991	-0.0736846	0.820518	-1.04337	0.000137251	0.175869	0.349375	0.660712	0.0149914	-0.308973	0.260259	0.734397	0.000454254	-0.382658	0.214239	four and a half LIM domains 1 [Source:HGNC Symbol;Acc:HGNC:3702]
RTF2	ENSG00000022277	6.82233	0.321649	1.70585e-05	0.0459414	0.723426	0.597356	2.54437e-08	0.080204	0.297732	-0.195503	0.0775388	0.355911	0.00064915	-0.241445	0.00506779	0.401853	0.000938962	replication termination factor 2 [Source:HGNC Symbol;Acc:HGNC:15890]
NLRP2	ENSG00000022556	5.37318	0.750694	0.0229833	0.743312	0.148997	0.758075	0.110476	-0.294967	0.380584	-0.302349	0.563765	-0.287586	0.574229	-1.04566	0.00540352	0.455726	0.421676	NLR family pyrin domain containing 2 [Source:HGNC Symbol;Acc:HGNC:22948]
SLC45A4	ENSG00000022567	4.75009	0.679534	3.18994e-11	0.616536	4.34675e-05	0.742532	2.01475e-07	-0.692218	4.75658e-12	-0.755216	6.98926e-08	-0.62922	1.28936e-05	-1.37175	3.33813e-27	-0.0126843	0.948	solute carrier family 45 member 4 [Source:HGNC Symbol;Acc:HGNC:29196]
RNF10	ENSG00000022840	7.52757	0.0529419	0.37653	-0.05223	0.576801	0.158114	0.0551332	0.0921649	0.101135	-0.013007	0.895034	0.197337	0.0126384	0.039223	0.563448	0.145107	0.120574	ring finger protein 10 [Source:HGNC Symbol;Acc:HGNC:10055]
ZNF839	ENSG00000022976	3.2098	-0.0853477	0.243595	-0.114675	0.298934	-0.0560203	0.6247	0.444461	1.21947e-10	0.415133	3.91678e-05	0.473788	8.96249e-07	0.529809	7.55428e-11	0.359113	0.00150225	zinc finger protein 839 [Source:HGNC Symbol;Acc:HGNC:20345]
ZDHHC6	ENSG00000023041	5.4798	-0.0752319	0.231138	-0.0951873	0.317605	-0.0552766	0.570208	-0.0967473	0.108921	-0.116703	0.200682	-0.0767919	0.400544	-0.0215154	0.773103	-0.171979	0.084521	zinc finger DHHC-type palmitoyltransferase 6 [Source:HGNC Symbol;Acc:HGNC:19160]
GRAMD1B	ENSG00000023171	2.11091	-0.409249	0.00101776	-0.384276	0.037614	-0.434222	0.0192708	-0.97486	9.34018e-15	-0.949887	3.88824e-08	-0.999834	3.99462e-08	-0.565611	7.72383e-05	-1.38411	2.47975e-11	GRAM domain containing 1B [Source:HGNC Symbol;Acc:HGNC:29214]
RNH1	ENSG00000023191	7.16012	0.471251	1.2528e-06	0.532351	0.000251014	0.410151	0.00320071	0.187794	0.0529143	0.248894	0.0888944	0.126695	0.388003	-0.283457	0.0112958	0.659046	2.85875e-05	ribonuclease/angiogenin inhibitor 1 [Source:HGNC Symbol;Acc:HGNC:10074]
NDUFS1	ENSG00000023228	6.74561	-0.28063	8.85042e-05	-0.399679	0.000119874	-0.161581	0.136586	-0.0644792	0.387158	-0.183528	0.084339	0.0545695	0.629474	0.216151	0.00888656	-0.345109	0.00305238	NADH:ubiquinone oxidoreductase core subunit S1 [Source:HGNC Symbol;Acc:HGNC:7707]
RB1CC1	ENSG00000023287	6.71755	0.328543	0.00172539	0.196106	0.23645	0.460981	0.002057	-0.129399	0.225784	-0.261836	0.0912812	0.00303863	0.986395	-0.457942	0.000139827	0.199144	0.265306	RB1 inducible coiled-coil 1 [Source:HGNC Symbol;Acc:HGNC:15574]
ERP44	ENSG00000023318	6.36181	0.0703427	0.299849	0.0512227	0.638755	0.0894626	0.370045	-0.534798	1.32131e-16	-0.553918	7.42241e-10	-0.515678	1.87921e-08	-0.60514	1.76629e-15	-0.464455	7.23505e-06	endoplasmic reticulum protein 44 [Source:HGNC Symbol;Acc:HGNC:18311]
ALAS1	ENSG00000023330	5.77533	0.125631	0.0750305	0.252706	0.0146179	-0.00144464	0.990728	-0.405748	2.25232e-09	-0.278672	0.00473323	-0.532823	6.51405e-08	-0.531378	3.87544e-11	-0.280117	0.012724	5'-aminolevulinate synthase 1 [Source:HGNC Symbol;Acc:HGNC:396]
BIRC3	ENSG00000023445	5.49439	-0.23061	0.241109	0.345216	0.247955	-0.806436	0.00412595	-0.81054	1.12695e-05	-0.234714	0.426913	-1.38637	6.74797e-07	-0.57993	0.00729077	-1.04115	0.000668592	baculoviral IAP repeat containing 3 [Source:HGNC Symbol;Acc:HGNC:591]
AKAP11	ENSG00000023516	6.08132	-0.678248	2.07372e-12	-0.712756	1.44785e-07	-0.643741	4.19026e-06	0.397955	1.67694e-05	0.363448	0.00881749	0.432463	0.000988989	1.0762	1.10088e-20	-0.280293	0.0734103	A-kinase anchoring protein 11 [Source:HGNC Symbol;Acc:HGNC:369]
GLRX2	ENSG00000023572	3.56692	0.206172	0.0475511	0.288134	0.0652908	0.12421	0.439511	-0.579607	8.51363e-09	-0.497645	0.000553914	-0.661569	6.57181e-06	-0.785779	4.87857e-11	-0.373435	0.025799	glutaredoxin 2 [Source:HGNC Symbol;Acc:HGNC:16065]
SNAPC1	ENSG00000023608	3.16344	0.0435068	0.590626	0.0680157	0.580386	0.0189979	0.880758	-0.491398	1.31803e-11	-0.466889	5.31958e-06	-0.515907	8.07143e-07	-0.534905	3.33966e-10	-0.447892	0.000153974	small nuclear RNA activating complex polypeptide 1 [Source:HGNC Symbol;Acc:HGNC:11134]
DERA	ENSG00000023697	4.99594	-0.0289992	0.765129	-0.0145155	0.927748	-0.043483	0.762075	-0.628017	1.51262e-13	-0.613533	2.3786e-07	-0.642501	1.46097e-07	-0.599018	1.33494e-09	-0.657016	1.85929e-06	deoxyribose-phosphate aldolase [Source:HGNC Symbol;Acc:HGNC:24269]
STRAP	ENSG00000023734	7.3118	0.126357	0.17051	0.0782359	0.601663	0.174477	0.192295	-0.451924	2.05626e-07	-0.500045	5.85423e-05	-0.403803	0.00146858	-0.578281	1.77294e-08	-0.325567	0.0250948	serine/threonine kinase receptor associated protein [Source:HGNC Symbol;Acc:HGNC:30796]
ABCC2	ENSG00000023839	2.57947	-1.8418	8.57707e-10	-2.63708	1.49015e-10	-1.04652	0.0172468	-2.62026	4.10131e-17	-3.41554	1.25898e-16	-1.82498	3.01585e-05	-0.778456	0.019141	-4.46206	4.31608e-16	ATP binding cassette subfamily C member 2 [Source:HGNC Symbol;Acc:HGNC:53]
DEF6	ENSG00000023892	4.69315	0.497343	7.81407e-06	0.559723	0.000791373	0.434964	0.00643942	0.0846464	0.467903	0.147026	0.405715	0.0222672	0.904082	-0.412697	0.00123351	0.58199	0.0012764	DEF6 guanine nucleotide exchange factor [Source:HGNC Symbol;Acc:HGNC:2760]
PLEKHO1	ENSG00000023902	5.93841	0.405449	0.000371868	0.571424	0.000836092	0.239474	0.160773	-0.517396	3.63551e-06	-0.351421	0.0336499	-0.683371	3.10623e-05	-0.922845	5.90429e-12	-0.111947	0.584167	pleckstrin homology domain containing O1 [Source:HGNC Symbol;Acc:HGNC:24310]
GCLM	ENSG00000023909	5.11154	0.0762788	0.494036	0.232283	0.143945	-0.0797252	0.636479	-0.357481	0.00035866	-0.201477	0.193168	-0.513485	0.000459271	-0.433759	0.000218201	-0.281202	0.098832	glutamate-cysteine ligase modifier subunit [Source:HGNC Symbol;Acc:HGNC:4312]
UBR2	ENSG00000024048	6.34707	-0.257981	0.00206955	-0.131315	0.322831	-0.384647	0.0017465	-0.139576	0.0968772	-0.0129101	0.931286	-0.266242	0.0277907	0.118404	0.230907	-0.397557	0.00344328	ubiquitin protein ligase E3 component n-recognin 2 [Source:HGNC Symbol;Acc:HGNC:21289]
EHD2	ENSG00000024422	6.53831	0.0278313	0.845565	0.202237	0.303066	-0.146574	0.452265	0.547268	5.49639e-06	0.721673	6.06774e-05	0.372863	0.0320786	0.519437	0.0002294	0.575099	0.00401208	EH domain containing 2 [Source:HGNC Symbol;Acc:HGNC:3243]
DEPDC1	ENSG00000024526	4.27168	0.352489	0.00940558	0.17624	0.423473	0.528737	0.00614459	-1.54309	1.65749e-26	-1.71934	3.31043e-19	-1.36685	1.34298e-11	-1.89558	7.18232e-28	-1.19061	7.22882e-08	DEP domain containing 1 [Source:HGNC Symbol;Acc:HGNC:22949]
CCDC28A	ENSG00000024862	4.43823	0.0113121	0.912039	0.302974	0.0194916	-0.28035	0.0279358	0.219528	0.00964564	0.51119	4.21306e-05	-0.0721331	0.593499	0.208216	0.0361844	0.23084	0.107377	coiled-coil domain containing 28A [Source:HGNC Symbol;Acc:HGNC:21098]
RRAGD	ENSG00000025039	4.5263	0.0200987	0.90256	0.154141	0.498108	-0.113943	0.613475	-1.67564	5.95478e-29	-1.54159	1.50282e-15	-1.80968	4.02342e-17	-1.69574	6.3679e-23	-1.65554	9.11006e-13	Ras related GTP binding D [Source:HGNC Symbol;Acc:HGNC:19903]
HSF2	ENSG00000025156	4.30587	-0.25758	0.00365911	-0.411999	0.00131369	-0.103162	0.463078	-0.659971	8.67374e-14	-0.81439	4.59441e-11	-0.505553	6.29837e-05	-0.402391	7.25765e-05	-0.917552	2.75167e-10	heat shock transcription factor 2 [Source:HGNC Symbol;Acc:HGNC:5225]
PHF20	ENSG00000025293	6.30675	-0.323155	7.31026e-06	-0.545616	1.57508e-07	-0.100694	0.373996	0.254971	0.000312649	0.03251	0.793868	0.477432	1.7015e-06	0.578126	8.15038e-12	-0.0681836	0.600451	PHD finger protein 20 [Source:HGNC Symbol;Acc:HGNC:16098]
HSD17B6	ENSG00000025423	2.50316	-0.152506	0.251362	-0.268517	0.16698	-0.036495	0.867404	-0.040883	0.76895	-0.156894	0.432864	0.0751282	0.709824	0.111623	0.463731	-0.193389	0.378448	hydroxysteroid 17-beta dehydrogenase 6 [Source:HGNC Symbol;Acc:HGNC:23316]
NR1H3	ENSG00000025434	4.78774	0.224318	0.0326706	0.378947	0.0152549	0.0696883	0.685248	-0.108989	0.305593	0.0456399	0.798366	-0.263619	0.0817425	-0.333307	0.00506153	0.115328	0.530324	nuclear receptor subfamily 1 group H member 3 [Source:HGNC Symbol;Acc:HGNC:7966]
TYMP	ENSG00000025708	6.97633	0.521996	0.00108834	0.66237	0.0062406	0.381622	0.105545	-0.361363	0.0222754	-0.220989	0.374503	-0.501737	0.0312198	-0.88336	1.67666e-06	0.160633	0.573944	thymidine phosphorylase [Source:HGNC Symbol;Acc:HGNC:3148]
NCAPH2	ENSG00000025770	5.64825	0.62348	1.18397e-09	0.642408	2.40485e-05	0.604553	2.61058e-05	-0.499555	5.02034e-07	-0.480628	0.000787634	-0.518483	0.000355903	-1.12304	8.78667e-20	0.123925	0.488464	non-SMC condensin II complex subunit H2 [Source:HGNC Symbol;Acc:HGNC:25071]
TOMM34	ENSG00000025772	5.85769	0.571981	6.8858e-11	0.486746	0.000159958	0.657216	9.39496e-08	-0.449016	1.17942e-07	-0.534251	9.89257e-06	-0.363781	0.00329097	-1.021	5.38806e-22	0.122965	0.414627	translocase of outer mitochondrial membrane 34 [Source:HGNC Symbol;Acc:HGNC:15746]
SEC63	ENSG00000025796	7.36632	-0.297335	0.000292312	-0.476619	5.9874e-05	-0.11805	0.359382	-0.534589	5.41572e-11	-0.713874	5.60834e-10	-0.355305	0.00255382	-0.237255	0.0122676	-0.831924	7.08611e-10	SEC63 homolog, protein translocation regulator [Source:HGNC Symbol;Acc:HGNC:21082]
KPNA6	ENSG00000025800	6.74317	-0.090748	0.182129	-0.21035	0.0305236	0.0288543	0.794468	-0.268078	2.69548e-05	-0.38768	2.42251e-05	-0.148475	0.121899	-0.17733	0.018525	-0.358826	0.000684381	karyopherin subunit alpha 6 [Source:HGNC Symbol;Acc:HGNC:6399]
VIM	ENSG00000026025	10.0114	0.0776256	0.550292	0.420095	0.0190032	-0.264843	0.139789	-0.596574	2.75163e-07	-0.254105	0.151594	-0.939043	4.87253e-08	-0.674199	7.65109e-07	-0.518948	0.0070091	vimentin [Source:HGNC Symbol;Acc:HGNC:12692]
RTEL1-TNFRSF6B	ENSG00000026036	1.29073	0.1813	0.207598	-0.168593	0.450235	0.531193	0.00702454	0.504052	0.000190547	0.154159	0.48765	0.853945	5.98182e-06	0.322751	0.0430448	0.685352	0.002224	RTEL1-TNFRSF6B readthrough (NMD candidate) [Source:HGNC Symbol;Acc:HGNC:44095]
FAS	ENSG00000026103	4.06535	-0.301204	0.0159412	0.100821	0.632221	-0.70323	0.000126925	-0.646159	1.11977e-07	-0.244133	0.191969	-1.04818	7.79981e-09	-0.344955	0.0156003	-0.947363	2.53199e-06	Fas cell surface death receptor [Source:HGNC Symbol;Acc:HGNC:11920]
RNASET2	ENSG00000026297	6.00108	0.488162	5.76694e-05	0.610769	0.000820039	0.365554	0.0389999	-0.0826892	0.51922	0.0399182	0.850272	-0.205297	0.261011	-0.570851	4.32124e-05	0.405472	0.043039	ribonuclease T2 [Source:HGNC Symbol;Acc:HGNC:21686]
CD44	ENSG00000026508	9.12444	-0.399241	0.00681259	-0.391019	0.0755341	-0.407464	0.0652882	-0.330435	0.0230577	-0.322213	0.141231	-0.338658	0.118461	0.0688063	0.703763	-0.729677	0.00222637	CD44 molecule (Indian blood group) [Source:HGNC Symbol;Acc:HGNC:1681]
KCNG1	ENSG00000026559	3.61817	1.46511	4.27938e-08	2.06961	7.27289e-07	0.86062	0.0216695	-3.81948	1.83884e-32	-3.21499	9.02014e-18	-4.42397	1.70197e-20	-5.28459	9.68208e-39	-2.35436	9.35484e-08	potassium voltage-gated channel modifier subfamily G member 1 [Source:HGNC Symbol;Acc:HGNC:6248]
AGPAT4	ENSG00000026652	3.68579	-0.151574	0.242985	0.144395	0.478806	-0.447543	0.015058	-1.22586	2.11237e-21	-0.929893	6.22505e-08	-1.52183	1.02697e-15	-1.07429	2.43022e-13	-1.37744	2.33858e-11	1-acylglycerol-3-phosphate O-acyltransferase 4 [Source:HGNC Symbol;Acc:HGNC:20885]
SLAMF7	ENSG00000026751	4.61157	-0.209869	0.347353	-0.215793	0.531476	-0.203945	0.548888	-1.17943	1.59223e-08	-1.18535	4.29749e-05	-1.1735	0.000144455	-0.969559	6.15209e-05	-1.3893	5.24931e-05	SLAM family member 7 [Source:HGNC Symbol;Acc:HGNC:21394]
BTN3A1	ENSG00000026950	5.39586	-0.25126	0.0275428	-0.163347	0.363454	-0.339173	0.0437877	-0.387372	0.000440436	-0.299458	0.0699184	-0.475285	0.00332541	-0.136112	0.307941	-0.638632	0.000458526	butyrophilin subfamily 3 member A1 [Source:HGNC Symbol;Acc:HGNC:1138]
MIPEP	ENSG00000027001	4.84768	-0.259609	0.00985726	-0.58573	4.67852e-05	0.0665111	0.688918	0.490267	5.83457e-07	0.164147	0.291837	0.816388	2.9726e-09	0.749876	1.36991e-10	0.230658	0.170593	mitochondrial intermediate peptidase [Source:HGNC Symbol;Acc:HGNC:7104]
PRKCH	ENSG00000027075	5.10713	-0.500729	1.16427e-07	-0.474771	0.000493694	-0.526687	0.000144441	0.00855999	0.937083	0.0345183	0.832542	-0.0173983	0.911969	0.509289	2.68257e-06	-0.492169	0.00127186	protein kinase C eta [Source:HGNC Symbol;Acc:HGNC:9403]
INSRR	ENSG00000027644	-0.632885	0.439773	0.0807031	0.833643	0.0279794	0.0459027	0.914216	-0.0562321	0.838008	0.337638	0.388302	-0.450102	0.22276	-0.496005	0.0818598	0.383541	0.367349	insulin receptor related receptor [Source:HGNC Symbol;Acc:HGNC:6093]
IFNGR1	ENSG00000027697	6.63389	-0.453863	1.45037e-06	-0.343044	0.0133847	-0.564682	4.76022e-05	-0.704601	8.42275e-14	-0.593783	6.4527e-06	-0.81542	2.56297e-09	-0.250739	0.0211149	-1.15846	1.7497e-13	interferon gamma receptor 1 [Source:HGNC Symbol;Acc:HGNC:5439]
B4GALT7	ENSG00000027847	4.8455	0.527787	3.00608e-09	0.648305	9.74168e-07	0.407269	0.00121933	0.186875	0.0330245	0.307393	0.0181684	0.066357	0.632739	-0.340912	0.000754008	0.714662	6.17959e-07	beta-1,4-galactosyltransferase 7 [Source:HGNC Symbol;Acc:HGNC:930]
SH2D2A	ENSG00000027869	2.78694	0.756567	2.97836e-06	0.861239	0.000433219	0.651895	0.00459019	-1.15533	1.14639e-12	-1.05065	2.49781e-06	-1.26	1.2526e-07	-1.91189	2.54364e-21	-0.398759	0.140234	SH2 domain containing 2A [Source:HGNC Symbol;Acc:HGNC:10821]
VRK2	ENSG00000028116	4.972	-0.458623	2.70948e-05	-0.120186	0.503611	-0.79706	1.09201e-06	-0.187823	0.0872084	0.150614	0.38496	-0.526259	0.000814678	0.2708	0.032432	-0.646446	0.0002678	VRK serine/threonine kinase 2 [Source:HGNC Symbol;Acc:HGNC:12719]
TNFRSF1B	ENSG00000028137	5.5037	0.0520493	0.724144	0.298465	0.141715	-0.194367	0.340685	-0.332764	0.00973398	-0.086348	0.69225	-0.57918	0.00208379	-0.384813	0.0103881	-0.280715	0.202819	TNF receptor superfamily member 1B [Source:HGNC Symbol;Acc:HGNC:11917]
VEZT	ENSG00000028203	6.22841	-0.42057	1.79481e-08	-0.616938	8.68327e-09	-0.224202	0.0428207	0.358353	8.75143e-07	0.161985	0.152215	0.554721	6.51405e-08	0.778924	3.21014e-18	-0.0622169	0.643993	vezatin, adherens junctions transmembrane protein [Source:HGNC Symbol;Acc:HGNC:18258]
POU2F2	ENSG00000028277	3.45284	-0.12149	0.485249	-0.0215287	0.943367	-0.221451	0.379966	-0.494189	0.00167441	-0.394228	0.0946873	-0.59415	0.0106461	-0.372699	0.0442768	-0.615678	0.0189014	POU class 2 homeobox 2 [Source:HGNC Symbol;Acc:HGNC:9213]
BRD9	ENSG00000028310	5.31522	0.298847	3.94603e-06	0.339754	0.000423609	0.25794	0.00583108	-0.225178	0.000393821	-0.184271	0.0530716	-0.266084	0.00411815	-0.524025	5.21657e-12	0.0736695	0.522244	bromodomain containing 9 [Source:HGNC Symbol;Acc:HGNC:25818]
SNX1	ENSG00000028528	7.00693	-0.332571	4.56576e-05	-0.417218	0.00042798	-0.247924	0.0418723	0.491391	1.17216e-09	0.406744	0.000633681	0.576038	3.27245e-07	0.823962	4.44202e-17	0.15882	0.25469	sorting nexin 1 [Source:HGNC Symbol;Acc:HGNC:11172]
TBPL1	ENSG00000028839	3.92084	0.00155338	0.986474	0.111349	0.36002	-0.108242	0.359672	-0.822458	2.72862e-25	-0.712663	1.76607e-11	-0.932253	1.32722e-16	-0.824011	1.75998e-19	-0.820904	3.89191e-11	TATA-box binding protein like 1 [Source:HGNC Symbol;Acc:HGNC:11589]
ARNTL2	ENSG00000029153	4.4831	-0.346472	0.0595814	-0.301142	0.286144	-0.391802	0.155526	-2.24133	8.06654e-29	-2.196	7.99304e-18	-2.28666	1.79225e-15	-1.89486	1.29762e-17	-2.5878	3.4948e-16	aryl hydrocarbon receptor nuclear translocator like 2 [Source:HGNC Symbol;Acc:HGNC:18984]
BCLAF1	ENSG00000029363	7.28363	-0.380082	1.82869e-10	-0.400749	2.58186e-06	-0.359416	3.09462e-05	-0.000831027	0.990944	-0.0214976	0.83317	0.0198355	0.837319	0.379251	2.64317e-08	-0.380913	6.38553e-05	BCL2 associated transcription factor 1 [Source:HGNC Symbol;Acc:HGNC:16863]
SLC39A9	ENSG00000029364	7.09004	-0.375383	8.76882e-07	-0.575828	1.63292e-07	-0.174939	0.129614	0.740663	5.23524e-21	0.540219	1.09511e-06	0.941108	2.84539e-18	1.11605	2.09606e-30	0.36528	0.00323781	solute carrier family 39 member 9 [Source:HGNC Symbol;Acc:HGNC:20182]
ANK1	ENSG00000029534	2.4493	0.716714	0.0214782	0.453791	0.365329	0.979637	0.0254042	1.60736	2.09524e-07	1.34444	0.00416444	1.87028	7.05316e-06	0.890645	0.0121647	2.32407	7.59894e-06	ankyrin 1 [Source:HGNC Symbol;Acc:HGNC:492]
IBSP	ENSG00000029559	1.94357	-0.37643	0.18778	-0.192915	0.678595	-0.559946	0.187273	-1.24859	4.61053e-06	-1.06507	0.0057325	-1.43211	0.000479758	-0.87216	0.00589752	-1.62502	0.000331693	integrin binding sialoprotein [Source:HGNC Symbol;Acc:HGNC:5341]
TFB1M	ENSG00000029639	3.33384	0.147396	0.0821895	0.173192	0.18027	0.1216	0.342214	-0.157624	0.0563203	-0.131828	0.30196	-0.18342	0.132456	-0.30502	0.00130868	-0.0102289	0.948987	transcription factor B1, mitochondrial [Source:HGNC Symbol;Acc:HGNC:17037]
RABEP1	ENSG00000029725	7.27704	-0.633382	2.36836e-14	-0.577545	6.25684e-07	-0.68922	1.09096e-08	1.5781	1.61711e-56	1.63394	2.34143e-33	1.52227	5.83969e-36	2.21149	1.96848e-68	0.944721	1.62285e-12	rabaptin, RAB GTPase binding effector protein 1 [Source:HGNC Symbol;Acc:HGNC:17677]
HMGB3	ENSG00000029993	6.68769	0.270908	0.0567931	-0.0962223	0.685896	0.638038	0.00125847	-0.94915	9.55568e-12	-1.31628	1.13115e-11	-0.58202	0.00388579	-1.22006	1.8366e-13	-0.678242	0.00276241	high mobility group box 3 [Source:HGNC Symbol;Acc:HGNC:5004]
NUP160	ENSG00000030066	6.24599	-0.187431	0.0382678	-0.220115	0.1036	-0.154747	0.25932	-0.63999	5.85978e-13	-0.672675	6.16494e-08	-0.607306	1.94837e-06	-0.45256	9.71853e-06	-0.827421	1.29222e-08	nucleoporin 160 [Source:HGNC Symbol;Acc:HGNC:18017]
BAK1	ENSG00000030110	4.9098	0.399719	7.79867e-07	0.306039	0.0118064	0.493399	1.81109e-05	-0.753257	9.65713e-20	-0.846937	1.09006e-13	-0.659577	1.48856e-08	-1.15298	2.57656e-29	-0.353538	0.00722344	BCL2 antagonist/killer 1 [Source:HGNC Symbol;Acc:HGNC:949]
MUSK	ENSG00000030304	-1.83565	-1.42088	5.14484e-05	-0.60432	0.247355	-2.23743	5.58797e-05	-1.16428	0.000674543	-0.347722	0.520987	-1.98083	0.000202186	0.256599	0.531643	-2.58515	1.14907e-05	muscle associated receptor tyrosine kinase [Source:HGNC Symbol;Acc:HGNC:7525]
IKZF2	ENSG00000030419	4.20562	-1.24841	5.06032e-14	-0.860393	0.000156242	-1.63643	7.41446e-11	0.278237	0.0809754	0.666257	0.00468625	-0.109782	0.664539	1.52665	2.00299e-15	-0.970175	0.000175213	IKAROS family zinc finger 2 [Source:HGNC Symbol;Acc:HGNC:13177]
GRN	ENSG00000030582	8.69452	0.358035	0.0005179	0.326874	0.0373921	0.389197	0.00881363	-0.158647	0.127556	-0.189809	0.227017	-0.127486	0.419168	-0.516683	1.341e-05	0.199388	0.25741	granulin precursor [Source:HGNC Symbol;Acc:HGNC:4601]
FAM13B	ENSG00000031003	5.15395	-0.593921	4.05425e-14	-0.727508	4.55764e-11	-0.460334	3.97194e-05	0.693922	5.80181e-19	0.560335	4.38541e-07	0.82751	9.14492e-15	1.28784	2.33145e-37	0.100001	0.455478	family with sequence similarity 13 member B [Source:HGNC Symbol;Acc:HGNC:1335]
ARHGAP31	ENSG00000031081	5.37391	-0.401259	5.40956e-05	-0.133625	0.405897	-0.668894	5.98393e-06	-0.469106	1.53555e-06	-0.201471	0.180455	-0.736741	2.92487e-07	-0.0678467	0.575257	-0.870365	8.46917e-08	Rho GTPase activating protein 31 [Source:HGNC Symbol;Acc:HGNC:29216]
CENPQ	ENSG00000031691	3.01811	0.116553	0.188972	0.138218	0.309624	0.0948875	0.482304	-0.326154	9.03451e-05	-0.304489	0.0129678	-0.34782	0.00437765	-0.442707	6.03806e-06	-0.209602	0.141722	centromere protein Q [Source:HGNC Symbol;Acc:HGNC:21347]
SARS1	ENSG00000031698	7.22099	0.19479	0.0122116	0.165019	0.170005	0.22456	0.0473988	-0.0938657	0.233183	-0.123636	0.299014	-0.0640955	0.597302	-0.288655	0.00110658	0.100924	0.455869	seryl-tRNA synthetase 1 [Source:HGNC Symbol;Acc:HGNC:10537]
RANBP3	ENSG00000031823	6.07353	0.329705	1.2009e-07	0.342903	0.000203962	0.316507	0.000365188	0.0234429	0.729964	0.0366411	0.728722	0.0102448	0.921741	-0.306262	1.77593e-05	0.353148	0.000448985	RAN binding protein 3 [Source:HGNC Symbol;Acc:HGNC:9850]
ARID4A	ENSG00000032219	4.67785	-0.617648	2.85457e-15	-0.602049	3.17489e-08	-0.633247	1.9342e-08	0.454379	1.11552e-09	0.469979	1.7542e-05	0.43878	2.7219e-05	1.07203	4.09834e-29	-0.163269	0.200988	AT-rich interaction domain 4A [Source:HGNC Symbol;Acc:HGNC:9885]
EIPR1	ENSG00000032389	4.83774	0.317634	1.44582e-05	0.115802	0.324339	0.519467	6.96392e-07	-0.239356	0.000879922	-0.441189	1.84739e-05	-0.0375236	0.751359	-0.556991	7.65317e-11	0.078278	0.54966	EARP complex and GARP complex interacting protein 1 [Source:HGNC Symbol;Acc:HGNC:12383]
PNPLA6	ENSG00000032444	5.82588	0.421683	1.63721e-06	0.455217	0.000527075	0.388148	0.0020462	-0.240071	0.00558001	-0.206536	0.115442	-0.273605	0.0317073	-0.661753	1.13972e-10	0.181612	0.223837	patatin like phospholipase domain containing 6 [Source:HGNC Symbol;Acc:HGNC:16268]
IFT88	ENSG00000032742	4.14299	-0.357404	3.96308e-06	-0.357512	0.00154407	-0.357295	0.00169291	0.849697	2.22972e-25	0.849589	2.22828e-13	0.849806	5.11493e-15	1.2071	2.81839e-33	0.492294	8.92624e-05	intraflagellar transport 88 [Source:HGNC Symbol;Acc:HGNC:20606]
ALG1	ENSG00000033011	4.66456	0.0506342	0.588624	-0.225201	0.078327	0.326469	0.00750506	0.408831	8.70777e-07	0.132997	0.315179	0.684666	4.79464e-09	0.358197	0.00023118	0.459465	0.000826419	ALG1 chitobiosyldiphosphodolichol beta-mannosyltransferase [Source:HGNC Symbol;Acc:HGNC:18294]
ZCCHC8	ENSG00000033030	4.87765	0.0157078	0.82911	0.0262794	0.814898	0.00513628	0.963149	0.212799	0.000552539	0.223371	0.0155297	0.202228	0.0236267	0.197092	0.00639362	0.228507	0.0266813	zinc finger CCHC-type containing 8 [Source:HGNC Symbol;Acc:HGNC:25265]
ABCF2	ENSG00000033050	6.27592	0.283608	6.04108e-05	0.305514	0.00388225	0.261702	0.0106843	-0.517313	2.56073e-13	-0.495407	5.98917e-07	-0.539219	1.05699e-07	-0.800921	1.3739e-20	-0.233705	0.0454485	ATP binding cassette subfamily F member 2 [Source:HGNC Symbol;Acc:HGNC:71]
CHPF2	ENSG00000033100	6.38159	0.191394	0.0267474	0.23147	0.0762567	0.151317	0.243353	-0.262644	0.00169549	-0.222567	0.0768846	-0.302721	0.0136338	-0.454037	3.61258e-06	-0.0712502	0.644416	chondroitin polymerizing factor 2 [Source:HGNC Symbol;Acc:HGNC:29270]
LRRC7	ENSG00000033122	-0.186314	-0.305497	0.0615785	-0.0358431	0.903504	-0.575151	0.0165982	-1.06779	2.68192e-11	-0.798141	0.000359789	-1.33745	1.9135e-08	-0.762297	3.45126e-05	-1.37329	1.87806e-07	leucine rich repeat containing 7 [Source:HGNC Symbol;Acc:HGNC:18531]
FUT8	ENSG00000033170	6.10877	-0.770636	1.61384e-12	-0.854426	2.16593e-08	-0.686845	1.37751e-05	1.22349	6.0561e-27	1.13969	1.37794e-12	1.30728	2.75965e-18	1.99412	5.56742e-42	0.45285	0.00915682	fucosyltransferase 8 [Source:HGNC Symbol;Acc:HGNC:4019]
UBA6	ENSG00000033178	6.01884	-0.333726	6.0325e-05	-0.564526	2.5529e-06	-0.102925	0.436031	-0.340002	3.09231e-05	-0.570802	9.63385e-07	-0.109201	0.390061	-0.00627608	0.952748	-0.673728	6.36973e-07	ubiquitin like modifier activating enzyme 6 [Source:HGNC Symbol;Acc:HGNC:25581]
GAB2	ENSG00000033327	5.83887	-0.359455	0.0440301	-0.315317	0.248186	-0.403593	0.130932	0.233702	0.190064	0.27784	0.312693	0.189564	0.479325	0.593157	0.00331482	-0.125753	0.694669	GRB2 associated binding protein 2 [Source:HGNC Symbol;Acc:HGNC:14458]
ATP6V0A1	ENSG00000033627	6.08709	0.136983	0.0686749	-0.0801377	0.508161	0.354104	0.000753103	0.324114	6.75187e-06	0.106993	0.354658	0.541235	9.85295e-08	0.187131	0.027682	0.461097	0.000107389	ATPase H+ transporting V0 subunit a1 [Source:HGNC Symbol;Acc:HGNC:865]
PIAS1	ENSG00000033800	5.45269	-0.429926	1.37887e-08	-0.494496	5.29789e-06	-0.365356	0.000930466	0.103717	0.175056	0.0391468	0.761733	0.168287	0.124945	0.533643	1.09951e-09	-0.32621	0.00782632	protein inhibitor of activated STAT 1 [Source:HGNC Symbol;Acc:HGNC:2752]
SLC4A7	ENSG00000033867	6.04144	-0.640588	1.28991e-05	-0.744164	0.000417658	-0.537011	0.014121	1.37114	2.81856e-19	1.26756	9.70696e-09	1.47471	3.40285e-13	2.01173	1.56304e-26	0.730551	0.00224616	solute carrier family 4 member 7 [Source:HGNC Symbol;Acc:HGNC:11033]
APBA2	ENSG00000034053	3.66894	0.593998	0.000176555	0.795029	0.000899921	0.392966	0.0924927	-2.23901	6.33095e-35	-2.03798	1.66546e-19	-2.44004	5.83578e-21	-2.83301	6.52693e-38	-1.64501	4.83408e-10	amyloid beta precursor protein binding family A member 2 [Source:HGNC Symbol;Acc:HGNC:579]
MAP2K3	ENSG00000034152	5.76178	0.294981	0.00065932	0.0845122	0.560561	0.505451	4.09071e-05	-0.542961	2.39088e-10	-0.75343	5.13828e-10	-0.332492	0.00758605	-0.837942	5.45269e-16	-0.247979	0.0852813	mitogen-activated protein kinase kinase 3 [Source:HGNC Symbol;Acc:HGNC:6843]
EFCAB1	ENSG00000034239	-0.0300478	0.528519	0.0641425	0.829495	0.0569727	0.227542	0.613541	0.555244	0.0464066	0.85622	0.0440952	0.254267	0.554363	0.026725	0.939838	1.08376	0.0188697	EF-hand calcium binding domain 1 [Source:HGNC Symbol;Acc:HGNC:25678]
TMSB10	ENSG00000034510	10.4776	0.392649	0.00183386	0.319932	0.100039	0.465366	0.010058	-1.06926	7.83281e-17	-1.14198	6.88328e-11	-0.996547	5.85267e-08	-1.46191	4.51711e-21	-0.676614	0.000919789	thymosin beta 10 [Source:HGNC Symbol;Acc:HGNC:11879]
ASTE1	ENSG00000034533	3.40105	-0.334926	7.92518e-09	-0.273613	0.00114248	-0.39624	2.92371e-06	-0.0193932	0.759334	0.0419206	0.663495	-0.080707	0.356813	0.315533	2.02059e-06	-0.35432	0.000146481	asteroid homolog 1 [Source:HGNC Symbol;Acc:HGNC:25021]
RNF19A	ENSG00000034677	6.82871	-0.255247	0.0320021	-0.187877	0.311038	-0.322618	0.0672274	-0.232863	0.0464529	-0.165492	0.365868	-0.300233	0.0807723	0.0223848	0.879954	-0.48811	0.0107647	ring finger protein 19A, RBR E3 ubiquitin protein ligase [Source:HGNC Symbol;Acc:HGNC:13432]
PEX3	ENSG00000034693	4.14038	-0.298005	0.000284767	-0.358265	0.00281159	-0.237745	0.0531603	-0.347159	1.6158e-05	-0.40742	0.000459605	-0.286899	0.0155073	-0.0491547	0.6245	-0.645164	1.30742e-06	peroxisomal biogenesis factor 3 [Source:HGNC Symbol;Acc:HGNC:8858]
GABARAPL2	ENSG00000034713	6.25354	0.387342	2.73154e-07	0.35041	0.00178481	0.424273	7.44396e-05	0.208826	0.00481755	0.171894	0.131896	0.245758	0.0212869	-0.178515	0.0403636	0.596168	1.03258e-06	GABA type A receptor associated protein like 2 [Source:HGNC Symbol;Acc:HGNC:13291]
MYOC	ENSG00000034971	-1.98818	0.0214991	0.953983	0.135836	0.827752	-0.092838	0.870854	2.36163	2.4855e-11	2.47596	4.40148e-06	2.24729	9.35777e-07	2.34013	8.72786e-09	2.38313	3.09955e-05	myocilin [Source:HGNC Symbol;Acc:HGNC:7610]
SH3YL1	ENSG00000035115	6.18952	0.0210741	0.850892	0.228982	0.123628	-0.186834	0.20381	-0.387231	3.81712e-05	-0.179324	0.219939	-0.595139	1.54345e-05	-0.408305	0.000212264	-0.366157	0.0199009	SH3 and SYLF domain containing 1 [Source:HGNC Symbol;Acc:HGNC:29546]
FAM136A	ENSG00000035141	5.78304	0.293345	4.46758e-05	0.225126	0.0392083	0.361564	0.000436678	-0.91963	4.10925e-32	-0.987849	2.40998e-21	-0.851411	1.50502e-15	-1.21298	1.97574e-37	-0.626285	8.98244e-08	family with sequence similarity 136 member A [Source:HGNC Symbol;Acc:HGNC:25911]
VCL	ENSG00000035403	7.61233	-0.341611	8.64206e-05	-0.409201	0.00122716	-0.27402	0.0347171	-0.41216	1.41223e-06	-0.479751	9.06835e-05	-0.344569	0.00594038	-0.0705492	0.503059	-0.753771	1.11154e-07	vinculin [Source:HGNC Symbol;Acc:HGNC:12665]
DEPDC1B	ENSG00000035499	3.11608	0.295903	0.0280801	0.0634202	0.786819	0.528386	0.00543435	-1.10869	2.53274e-16	-1.34117	4.8344e-13	-0.876204	5.40597e-06	-1.40459	3.66845e-18	-0.812784	0.000162264	DEP domain containing 1B [Source:HGNC Symbol;Acc:HGNC:24902]
DAPK2	ENSG00000035664	4.18493	0.316002	0.0155335	0.766252	8.72444e-05	-0.134249	0.519544	-0.0754239	0.584491	0.374826	0.0529496	-0.525674	0.00489297	-0.391425	0.00852545	0.240578	0.276318	death associated protein kinase 2 [Source:HGNC Symbol;Acc:HGNC:2675]
NSMAF	ENSG00000035681	5.47337	0.372962	6.28412e-07	0.353964	0.00149711	0.39196	0.000235831	-0.313288	1.8637e-05	-0.332286	0.00180649	-0.29429	0.00606195	-0.68625	9.78385e-15	0.059674	0.660831	neutral sphingomyelinase activation associated factor [Source:HGNC Symbol;Acc:HGNC:8017]
ADSS2	ENSG00000035687	6.82195	-0.188221	0.0228757	0.0058236	0.971528	-0.382266	0.00143421	-0.144744	0.0771427	0.0493015	0.722044	-0.338788	0.00382416	0.0434779	0.664887	-0.332965	0.0125606	adenylosuccinate synthase 2 [Source:HGNC Symbol;Acc:HGNC:292]
STAP1	ENSG00000035720	0.727028	0.0588496	0.825476	0.240105	0.533936	-0.122406	0.753747	-0.132065	0.592023	0.04919	0.904065	-0.313321	0.375931	-0.190915	0.492574	-0.0732159	0.86834	signal transducing adaptor family member 1 [Source:HGNC Symbol;Acc:HGNC:24133]
TIMP2	ENSG00000035862	8.69671	-0.332613	0.0030627	-0.1913	0.277267	-0.473925	0.00419212	-0.163556	0.148905	-0.022244	0.910725	-0.304869	0.0624806	0.169056	0.200157	-0.496169	0.00653016	TIMP metallopeptidase inhibitor 2 [Source:HGNC Symbol;Acc:HGNC:11821]
RFC1	ENSG00000035928	6.14378	-0.13845	0.0710847	-0.133307	0.257208	-0.143593	0.210567	0.179659	0.015428	0.184802	0.101988	0.174516	0.108621	0.318109	0.000217335	0.0412092	0.76679	replication factor C subunit 1 [Source:HGNC Symbol;Acc:HGNC:9969]
TBC1D23	ENSG00000036054	5.58811	-0.219009	0.00251976	-0.142039	0.206943	-0.29598	0.00538262	-0.276762	9.37236e-05	-0.199791	0.0606035	-0.353732	0.000610596	-0.0577524	0.509437	-0.495771	2.26492e-05	TBC1 domain family member 23 [Source:HGNC Symbol;Acc:HGNC:25622]
CUL3	ENSG00000036257	6.42159	-0.219269	0.000605746	-0.334412	0.000322822	-0.104126	0.293674	0.264029	2.52975e-05	0.148887	0.124404	0.379172	1.94435e-05	0.483298	9.682e-11	0.0447604	0.702737	cullin 3 [Source:HGNC Symbol;Acc:HGNC:2553]
MYOM2	ENSG00000036448	2.22202	-1.91342	7.75285e-13	-4.05559	2.31571e-25	0.228739	0.572241	-1.66522	8.03828e-11	-3.80739	4.85372e-24	0.47694	0.194415	0.248201	0.411648	-3.57865	6.64882e-15	myomesin 2 [Source:HGNC Symbol;Acc:HGNC:7614]
CYP46A1	ENSG00000036530	0.3087	-0.356497	0.0289649	-0.271443	0.282802	-0.441551	0.068832	0.539562	0.000646435	0.624616	0.00890079	0.454508	0.0469469	0.896058	1.50519e-06	0.183065	0.521185	cytochrome P450 family 46 subfamily A member 1 [Source:HGNC Symbol;Acc:HGNC:2641]
	ENSG00000036549	5.8464	-0.275809	0.000315063	-0.0941701	0.450291	-0.457448	4.81365e-05	-0.0352556	0.671203	0.146383	0.214746	-0.216895	0.051691	0.240554	0.00640645	-0.311065	0.0129978
USP2	ENSG00000036672	2.19423	0.2172	0.207523	-0.111105	0.693846	0.545504	0.0219519	-0.606869	0.000177543	-0.935173	4.47285e-05	-0.278564	0.262841	-0.824068	1.49094e-05	-0.389669	0.160071	ubiquitin specific peptidase 2 [Source:HGNC Symbol;Acc:HGNC:12618]
TUBG2	ENSG00000037042	3.90098	0.480388	7.96956e-07	0.411405	0.00478865	0.54937	6.74005e-05	0.725293	1.02079e-13	0.65631	3.69686e-06	0.794275	2.94164e-09	0.244905	0.0292776	1.20568	1.31621e-13	tubulin gamma 2 [Source:HGNC Symbol;Acc:HGNC:12419]
RPL26L1	ENSG00000037241	4.39182	0.381505	5.99514e-05	0.386382	0.00691693	0.376628	0.00591191	-0.055664	0.583865	-0.0507866	0.754202	-0.0605413	0.690479	-0.437169	6.3564e-05	0.325841	0.0377543	ribosomal protein L26 like 1 [Source:HGNC Symbol;Acc:HGNC:17050]
FLT4	ENSG00000037280	3.85613	-0.194022	0.0977831	-0.0755244	0.699251	-0.31252	0.0679889	0.223095	0.0498558	0.341593	0.0445423	0.104597	0.554646	0.417117	0.00144566	0.0290723	0.894717	fms related receptor tyrosine kinase 4 [Source:HGNC Symbol;Acc:HGNC:3767]
NSUN2	ENSG00000037474	6.69665	0.244283	0.000443132	0.0834131	0.465384	0.405153	4.46023e-05	-0.56699	6.43587e-16	-0.72786	1.40902e-13	-0.406121	4.21423e-05	-0.811273	1.36561e-21	-0.322707	0.00436257	NOP2/Sun RNA methyltransferase 2 [Source:HGNC Symbol;Acc:HGNC:25994]
FBXO42	ENSG00000037637	5.08488	-0.0253099	0.625656	-0.0811946	0.269921	0.0305749	0.69426	-0.070533	0.134994	-0.126418	0.0669876	-0.0146482	0.849318	-0.0452231	0.419984	-0.0958429	0.227077	F-box protein 42 [Source:HGNC Symbol;Acc:HGNC:29249]
MFAP3	ENSG00000037749	4.50082	-0.947203	2.68833e-14	-1.04663	1.19032e-09	-0.847777	2.36583e-06	0.601739	3.49119e-07	0.502313	0.0044923	0.701165	2.18043e-05	1.54894	1.07907e-24	-0.345464	0.0834122	microfibril associated protein 3 [Source:HGNC Symbol;Acc:HGNC:7034]
MRI1	ENSG00000037757	4.5691	0.136197	0.118269	0.21821	0.093069	0.054185	0.700361	0.071117	0.419142	0.153129	0.240648	-0.0108954	0.939177	-0.0650805	0.524958	0.207314	0.143502	methylthioribose-1-phosphate isomerase 1 [Source:HGNC Symbol;Acc:HGNC:28469]
METTL1	ENSG00000037897	4.53885	0.501141	4.72052e-08	0.185476	0.195603	0.816806	4.37443e-10	-0.104785	0.262237	-0.42045	0.00115921	0.21088	0.111098	-0.605926	1.03291e-08	0.396356	0.00774112	methyltransferase like 1 [Source:HGNC Symbol;Acc:HGNC:7030]
HOXC8	ENSG00000037965	2.20065	-0.0547655	0.69138	0.067672	0.753189	-0.177203	0.358134	0.118543	0.350877	0.24098	0.203079	-0.00389484	0.985257	0.173308	0.232378	0.0637772	0.780432	homeobox C8 [Source:HGNC Symbol;Acc:HGNC:5129]
AGA	ENSG00000038002	4.85734	-0.361228	0.000261127	-0.587164	3.85935e-05	-0.135293	0.385703	0.0716554	0.492179	-0.15428	0.314103	0.297591	0.0347751	0.432884	0.000142715	-0.289573	0.0783945	aspartylglucosaminidase [Source:HGNC Symbol;Acc:HGNC:318]
PI4K2B	ENSG00000038210	4.55592	-0.0382594	0.704997	0.127042	0.382674	-0.203561	0.134282	-0.398193	5.89247e-06	-0.232892	0.0789484	-0.563494	1.16409e-05	-0.359934	0.000476335	-0.436452	0.00274935	phosphatidylinositol 4-kinase type 2 beta [Source:HGNC Symbol;Acc:HGNC:18215]
BOD1L1	ENSG00000038219	6.07875	-0.517513	8.9398e-09	-0.586767	5.04433e-06	-0.44826	0.000639995	0.391699	7.71881e-06	0.322446	0.0143362	0.460952	0.000199276	0.909212	2.66649e-17	-0.125814	0.420419	biorientation of chromosomes in cell division 1 like 1 [Source:HGNC Symbol;Acc:HGNC:31792]
MAT2B	ENSG00000038274	6.07366	-0.139063	0.0610944	-0.129786	0.255352	-0.14834	0.180442	0.177126	0.0137691	0.186404	0.0879566	0.167849	0.111859	0.31619	0.000151338	0.0380632	0.778579	methionine adenosyltransferase 2B [Source:HGNC Symbol;Acc:HGNC:6905]
TLL1	ENSG00000038295	2.28321	-1.24686	3.94168e-10	-1.58756	9.36964e-09	-0.906155	0.00189056	0.171302	0.396104	-0.169399	0.592987	0.512002	0.0644142	1.41816	6.66327e-10	-1.07555	0.000691959	tolloid like 1 [Source:HGNC Symbol;Acc:HGNC:11843]
EDC4	ENSG00000038358	5.35402	0.152136	0.0785593	0.0259807	0.865238	0.278292	0.0233234	-0.179986	0.0317547	-0.306141	0.0116607	-0.0538299	0.689218	-0.332122	0.000602274	-0.0278492	0.863031	enhancer of mRNA decapping 4 [Source:HGNC Symbol;Acc:HGNC:17157]
TRIO	ENSG00000038382	6.93693	-0.524484	5.36991e-07	-0.525158	0.00050104	-0.52381	0.000665542	-0.0431662	0.703445	-0.04384	0.807627	-0.0424924	0.803266	0.481318	6.09935e-05	-0.56765	0.000803382	trio Rho guanine nucleotide exchange factor [Source:HGNC Symbol;Acc:HGNC:12303]
VCAN	ENSG00000038427	8.79812	-1.212	7.18406e-15	-1.38705	7.82078e-11	-1.03694	3.93811e-06	0.0757425	0.636428	-0.0993121	0.689941	0.250797	0.255404	1.28774	4.01295e-13	-1.13625	2.92794e-06	versican [Source:HGNC Symbol;Acc:HGNC:2464]
CLEC16A	ENSG00000038532	5.41767	-0.140807	0.0813399	-0.184991	0.123919	-0.096622	0.438904	-0.0412834	0.625721	-0.0854681	0.498747	0.00290127	0.983059	0.0995233	0.286805	-0.18209	0.169839	C-type lectin domain containing 16A [Source:HGNC Symbol;Acc:HGNC:29013]
MSR1	ENSG00000038945	5.62291	-0.736217	3.22862e-08	-0.618701	0.00117674	-0.853733	1.54137e-05	-6.2805e-05	0.999737	0.117454	0.589739	-0.117579	0.570858	0.736154	1.42153e-06	-0.73628	0.000598171	macrophage scavenger receptor 1 [Source:HGNC Symbol;Acc:HGNC:7376]
CDH1	ENSG00000039068	9.08315	0.200657	0.265278	-0.365672	0.162032	0.766987	0.00154326	0.251834	0.145512	-0.314496	0.225002	0.818163	0.000509653	0.0511761	0.810783	0.452491	0.113541	cadherin 1 [Source:HGNC Symbol;Acc:HGNC:1748]
MTREX	ENSG00000039123	6.13537	-0.377383	3.8916e-08	-0.457589	3.62023e-06	-0.297177	0.00305498	0.314994	2.61572e-06	0.234788	0.0198525	0.3952	3.0912e-05	0.692377	3.03044e-17	-0.0623889	0.613668	Mtr4 exosome RNA helicase [Source:HGNC Symbol;Acc:HGNC:18734]
DNAH5	ENSG00000039139	4.01398	-0.892933	2.22463e-05	-1.00574	0.000802653	-0.780122	0.0133704	1.98817	5.19528e-19	1.87536	8.6251e-09	2.10098	3.954e-13	2.8811	2.60516e-25	1.09524	0.00141875	dynein axonemal heavy chain 5 [Source:HGNC Symbol;Acc:HGNC:2950]
ZFYVE16	ENSG00000039319	5.81086	-0.621553	6.47859e-16	-0.818422	3.24935e-14	-0.424684	9.077e-05	0.777012	8.84924e-24	0.580143	7.50242e-08	0.973881	2.64466e-20	1.39856	1.59293e-43	0.155459	0.215699	zinc finger FYVE-type containing 16 [Source:HGNC Symbol;Acc:HGNC:20756]
RIPOR1	ENSG00000039523	5.91762	0.175206	0.0381383	0.0713368	0.612181	0.279076	0.0208726	0.30212	0.000207326	0.19825	0.114829	0.40599	0.000439112	0.126914	0.194721	0.477326	0.000393025	RHO family interacting cell polarization regulator 1 [Source:HGNC Symbol;Acc:HGNC:25836]
C6	ENSG00000039537	1.00552	-1.3136	0.000156147	-1.04286	0.0371077	-1.58434	0.00289487	-0.00426268	0.991625	0.266475	0.640434	-0.275001	0.613411	1.30933	0.00101585	-1.31786	0.0202696	complement C6 [Source:HGNC Symbol;Acc:HGNC:1339]
RAI14	ENSG00000039560	6.33473	-0.249733	0.0220067	-0.131468	0.452497	-0.367997	0.0215914	-0.682643	1.65503e-10	-0.564379	0.000191808	-0.800908	2.78204e-07	-0.43291	0.000465837	-0.932376	1.15492e-07	retinoic acid induced 14 [Source:HGNC Symbol;Acc:HGNC:14873]
SOX30	ENSG00000039600	-1.01787	0.0676295	0.771581	-0.0610491	0.868721	0.196308	0.554768	-1.50404	6.21669e-13	-1.63272	8.03376e-09	-1.37536	6.56e-06	-1.57167	1.15935e-10	-1.43641	2.00728e-05	SRY-box transcription factor 30 [Source:HGNC Symbol;Acc:HGNC:30635]
PNKP	ENSG00000039650	4.90317	0.496637	2.6281e-08	0.389733	0.00335331	0.60354	1.73599e-06	0.328033	0.000162006	0.221129	0.098721	0.434936	0.000415462	-0.168604	0.103551	0.82467	1.38027e-08	polynucleotide kinase 3'-phosphatase [Source:HGNC Symbol;Acc:HGNC:9154]
PHLPP2	ENSG00000040199	4.14713	-0.263554	0.00360352	-0.380763	0.00383449	-0.146346	0.295831	0.0249358	0.803135	-0.092273	0.526213	0.142145	0.291949	0.28849	0.00545884	-0.238619	0.113275	PH domain and leucine rich repeat protein phosphatase 2 [Source:HGNC Symbol;Acc:HGNC:29149]
SPDL1	ENSG00000040275	4.12793	0.292452	0.000224268	0.24765	0.0397316	0.337255	0.00307808	-0.690245	1.10231e-17	-0.735048	4.08855e-11	-0.645443	1.62005e-08	-0.982698	1.1113e-23	-0.397793	0.00200463	spindle apparatus coiled-coil protein 1 [Source:HGNC Symbol;Acc:HGNC:26010]
STAU2	ENSG00000040341	6.0569	0.431491	8.11141e-06	0.229328	0.125924	0.633654	3.96188e-06	0.356283	0.000171186	0.154121	0.307807	0.558446	2.86542e-05	-0.0752075	0.520808	0.787774	5.63897e-07	staufen double-stranded RNA binding protein 2 [Source:HGNC Symbol;Acc:HGNC:11371]
SLC66A1	ENSG00000040487	4.13346	0.558783	9.63249e-10	0.38157	0.00484764	0.735997	1.16789e-08	0.138939	0.127549	-0.0382748	0.805863	0.316153	0.0131232	-0.419844	5.19307e-05	0.697723	1.97551e-06	solute carrier family 66 member 1 [Source:HGNC Symbol;Acc:HGNC:26001]
CTNS	ENSG00000040531	4.22197	0.0434921	0.549833	0.0234851	0.843736	0.0634992	0.550564	-0.112066	0.0912191	-0.132073	0.187604	-0.0920591	0.358616	-0.155558	0.0420659	-0.068574	0.561469	cystinosin, lysosomal cystine transporter [Source:HGNC Symbol;Acc:HGNC:2518]
RTN4R	ENSG00000040608	2.86313	0.570513	0.00019791	0.327499	0.172885	0.813527	0.000167755	-1.139	1.77172e-13	-1.38201	7.98704e-11	-0.895984	5.68976e-05	-1.70951	1.52657e-19	-0.568485	0.0236843	reticulon 4 receptor [Source:HGNC Symbol;Acc:HGNC:18601]
PHF23	ENSG00000040633	5.39436	-0.0114161	0.88412	0.0324626	0.781055	-0.0552948	0.610353	0.0412285	0.558818	0.0851072	0.419878	-0.00265024	0.98155	0.0526446	0.511655	0.0298124	0.811186	PHD finger protein 23 [Source:HGNC Symbol;Acc:HGNC:28428]
INPP4A	ENSG00000040933	5.11118	-0.246842	5.35252e-05	-0.198461	0.0296493	-0.295223	0.000976277	-0.296706	7.61934e-07	-0.248325	0.00469028	-0.345088	7.3794e-05	-0.0498644	0.500543	-0.543548	4.9015e-08	inositol polyphosphate-4-phosphatase type I A [Source:HGNC Symbol;Acc:HGNC:6074]
RAB27B	ENSG00000041353	5.92743	-1.15724	2.92618e-12	-1.53255	2.76068e-11	-0.781935	0.00108912	1.30823	1.84167e-15	0.932925	8.87793e-05	1.68354	3.72401e-14	2.46547	9.88578e-31	0.15099	0.60204	RAB27B, member RAS oncogene family [Source:HGNC Symbol;Acc:HGNC:9767]
PSMA4	ENSG00000041357	7.22424	0.247257	0.00287681	0.0539332	0.705823	0.44058	0.000183162	-0.371987	4.40301e-06	-0.56531	1.01988e-06	-0.178663	0.144009	-0.619244	1.39521e-10	-0.12473	0.385667	proteasome 20S subunit alpha 4 [Source:HGNC Symbol;Acc:HGNC:9533]
MYO16	ENSG00000041515	0.475274	-0.151974	0.558349	0.576701	0.118378	-0.880649	0.0135729	0.117861	0.642829	0.846536	0.0171541	-0.610814	0.0809371	0.269835	0.33547	-0.0341135	0.940771	myosin XVI [Source:HGNC Symbol;Acc:HGNC:29822]
LSG1	ENSG00000041802	5.97564	0.11257	0.0774005	-0.109583	0.262412	0.334723	0.000162766	-0.222251	0.00026238	-0.444405	3.49804e-07	-9.82141e-05	0.999185	-0.334822	2.83329e-06	-0.109681	0.304458	large 60S subunit nuclear export GTPase 1 [Source:HGNC Symbol;Acc:HGNC:25652]
PARP3	ENSG00000041880	4.41317	-0.170387	0.0958971	0.0191704	0.918064	-0.359944	0.0146231	0.639191	9.93082e-11	0.828748	1.61049e-08	0.449633	0.0011678	0.809577	4.66119e-12	0.468804	0.00380048	poly(ADP-ribose) polymerase family member 3 [Source:HGNC Symbol;Acc:HGNC:273]
TNC	ENSG00000041982	8.41399	-0.404372	0.0621902	-0.272785	0.424595	-0.53596	0.0973679	-0.860552	3.81607e-05	-0.728965	0.0159952	-0.99214	0.00144585	-0.45618	0.0644184	-1.26492	0.000270105	tenascin C [Source:HGNC Symbol;Acc:HGNC:5318]
THAP3	ENSG00000041988	3.74777	0.579666	2.7892e-10	0.605909	8.09844e-06	0.553422	1.74057e-05	0.180528	0.0458381	0.206772	0.13316	0.154285	0.251573	-0.399137	0.000124519	0.760194	2.6252e-07	THAP domain containing 3 [Source:HGNC Symbol;Acc:HGNC:20855]
RIPOR3	ENSG00000042062	3.22712	-0.564814	0.0174767	-0.577961	0.101712	-0.551667	0.124687	1.8888	1.25791e-14	1.87566	2.58933e-07	1.90195	2.9805e-09	2.45362	8.21452e-17	1.32399	0.000604242	RIPOR family member 3 [Source:HGNC Symbol;Acc:HGNC:16168]
TDP1	ENSG00000042088	4.76974	-0.111051	0.0936241	-0.208572	0.0297747	-0.0135292	0.903896	-0.316825	5.25051e-07	-0.414347	4.66378e-06	-0.219304	0.0180551	-0.205774	0.00548815	-0.427876	3.98914e-05	tyrosyl-DNA phosphodiesterase 1 [Source:HGNC Symbol;Acc:HGNC:18884]
AIFM2	ENSG00000042286	4.49553	0.444226	1.52421e-05	0.374359	0.0158898	0.514094	0.000433563	-0.140845	0.177102	-0.210712	0.174226	-0.0709773	0.664193	-0.585071	7.99645e-07	0.303382	0.075511	apoptosis inducing factor mitochondria associated 2 [Source:HGNC Symbol;Acc:HGNC:21411]
SPATA7	ENSG00000042317	3.105	-0.271414	2.96475e-05	-0.0958738	0.358196	-0.446955	3.10115e-06	0.379307	3.49706e-09	0.554847	5.10976e-09	0.203767	0.0280947	0.650721	6.7294e-17	0.107893	0.337577	spermatogenesis associated 7 [Source:HGNC Symbol;Acc:HGNC:20423]
MED17	ENSG00000042429	5.08202	-0.0479317	0.503342	0.0929797	0.380979	-0.188843	0.0535037	-0.480867	1.96814e-13	-0.339956	0.000245571	-0.621778	5.52987e-11	-0.432935	1.14547e-08	-0.528799	6.40566e-07	mediator complex subunit 17 [Source:HGNC Symbol;Acc:HGNC:2375]
RETSAT	ENSG00000042445	6.67731	-0.318533	0.00204057	-0.524823	0.000427607	-0.112242	0.497204	0.203067	0.0485489	-0.00322312	0.986901	0.409358	0.00457312	0.5216	1.11478e-05	-0.115465	0.528637	retinol saturase [Source:HGNC Symbol;Acc:HGNC:25991]
CAPG	ENSG00000042493	7.78581	0.462178	0.000196825	0.730517	9.6321e-05	0.193838	0.30969	-0.308707	0.011865	-0.040367	0.851791	-0.577047	0.00125998	-0.770884	8.37194e-08	0.153471	0.483395	capping actin protein, gelsolin like [Source:HGNC Symbol;Acc:HGNC:1474]
AP2S1	ENSG00000042753	6.5876	0.537361	1.44693e-07	0.447603	0.00337184	0.627119	1.40947e-05	-0.26298	0.0088135	-0.352739	0.0161491	-0.173222	0.257153	-0.800341	1.95329e-11	0.274381	0.106209	adaptor related protein complex 2 subunit sigma 1 [Source:HGNC Symbol;Acc:HGNC:565]
USH2A	ENSG00000042781	-0.907019	-0.987581	6.49185e-06	-0.741295	0.0201072	-1.23387	0.000175946	0.68748	0.00136068	0.933765	0.00402161	0.441195	0.164332	1.67506	9.40045e-11	-0.300101	0.430826	usherin [Source:HGNC Symbol;Acc:HGNC:12601]
TG	ENSG00000042832	0.88077	-1.10471	4.68993e-06	-1.94175	1.03451e-08	-0.26767	0.486171	-0.96546	4.22814e-05	-1.8025	4.18171e-08	-0.12842	0.738872	0.13925	0.633149	-2.07017	2.34765e-07	thyroglobulin [Source:HGNC Symbol;Acc:HGNC:11764]
ADAM28	ENSG00000042980	3.44529	-0.649375	4.081e-05	-0.425392	0.0723902	-0.873358	0.000217202	0.0912582	0.588931	0.315241	0.196105	-0.132725	0.594593	0.740633	4.82966e-05	-0.558116	0.0320066	ADAM metallopeptidase domain 28 [Source:HGNC Symbol;Acc:HGNC:206]
BARX2	ENSG00000043039	5.21555	0.739894	0.00142414	0.800225	0.0246892	0.679563	0.0419253	-0.89034	9.03655e-05	-0.830009	0.0112179	-0.950671	0.00510168	-1.63023	2.42943e-09	-0.150446	0.722859	BARX homeobox 2 [Source:HGNC Symbol;Acc:HGNC:956]
DCUN1D1	ENSG00000043093	5.59383	-0.256875	0.00103648	-0.22885	0.0510902	-0.284899	0.0138272	-0.311599	4.83654e-05	-0.283575	0.0119643	-0.339624	0.00245532	-0.0547248	0.565184	-0.568474	7.29019e-06	defective in cullin neddylation 1 domain containing 1 [Source:HGNC Symbol;Acc:HGNC:18184]
JADE2	ENSG00000043143	5.64259	-0.228481	0.0286399	0.0090194	0.964164	-0.465982	0.00212687	1.07185	2.97277e-23	1.30935	1.64614e-16	0.83435	3.86458e-09	1.30033	3.89926e-24	0.84337	4.93856e-07	jade family PHD finger 2 [Source:HGNC Symbol;Acc:HGNC:22984]
ZIC2	ENSG00000043355	1.46639	0.862303	0.0301418	0.508742	0.429124	1.21586	0.0286705	-0.570964	0.147297	-0.924525	0.103708	-0.217403	0.728777	-1.43327	0.00159816	0.291339	0.68117	Zic family member 2 [Source:HGNC Symbol;Acc:HGNC:12873]
LCP2	ENSG00000043462	4.99728	-0.295521	0.029066	-0.0748723	0.747062	-0.51617	0.00925117	-0.3284	0.0128137	-0.107751	0.623299	-0.549049	0.00444021	-0.0328782	0.844868	-0.623921	0.00409104	lymphocyte cytosolic protein 2 [Source:HGNC Symbol;Acc:HGNC:6529]
TRIT1	ENSG00000043514	4.68345	0.324288	2.20168e-06	0.374403	0.000240775	0.274173	0.00553132	-0.596126	1.02886e-17	-0.546011	1.34133e-08	-0.646241	7.48526e-11	-0.920414	6.64912e-27	-0.271838	0.01526	tRNA isopentenyltransferase 1 [Source:HGNC Symbol;Acc:HGNC:20286]
ADRB1	ENSG00000043591	0.755213	0.683057	0.0417397	1.20103	0.0199597	0.165085	0.763996	1.27437	9.96227e-05	1.79234	0.000441064	0.756399	0.106579	0.591314	0.123801	1.95743	0.00037023	adrenoceptor beta 1 [Source:HGNC Symbol;Acc:HGNC:285]
CUL7	ENSG00000044090	6.2314	0.290574	0.00231944	0.401163	0.00497488	0.179984	0.211726	-0.225484	0.0166938	-0.114895	0.446858	-0.336074	0.0143943	-0.516058	2.4935e-06	0.0650899	0.70947	cullin 7 [Source:HGNC Symbol;Acc:HGNC:21024]
CTNNA1	ENSG00000044115	8.84342	-0.232457	0.000619494	-0.406852	3.54371e-05	-0.0580614	0.60117	0.217676	0.00111367	0.0432808	0.706289	0.392072	3.19095e-05	0.450133	1.09479e-08	-0.0147806	0.910844	catenin alpha 1 [Source:HGNC Symbol;Acc:HGNC:2509]
PHKA2	ENSG00000044446	5.20463	-0.0557901	0.449308	-0.0783241	0.482276	-0.0332562	0.772942	-0.112708	0.0996509	-0.135242	0.190545	-0.0901738	0.384209	-0.0569176	0.488832	-0.168498	0.139834	phosphorylase kinase regulatory subunit alpha 2 [Source:HGNC Symbol;Acc:HGNC:8926]
CNTLN	ENSG00000044459	3.65068	-0.358829	0.00585698	-0.194098	0.346419	-0.523559	0.00645351	-0.52527	3.51473e-05	-0.360539	0.0568365	-0.69	0.000223061	-0.166441	0.278204	-0.884098	2.63504e-05	centlein [Source:HGNC Symbol;Acc:HGNC:23432]
EPHA3	ENSG00000044524	2.73825	-0.303603	0.226632	-1.11216	0.001202	0.504958	0.156296	1.09639	4.13376e-06	0.287833	0.456887	1.90495	5.95975e-09	1.4	6.42509e-07	0.79279	0.0462733	EPH receptor A3 [Source:HGNC Symbol;Acc:HGNC:3387]
HSPA5	ENSG00000044574	9.73452	0.0930245	0.325911	0.0633857	0.678512	0.122663	0.376782	-0.330455	0.000151677	-0.360094	0.00465914	-0.300816	0.0193364	-0.42348	3.47976e-05	-0.237431	0.110201	heat shock protein family A (Hsp70) member 5 [Source:HGNC Symbol;Acc:HGNC:5238]
DSG2	ENSG00000046604	7.77321	-0.18177	0.182924	0.163371	0.447128	-0.526912	0.00673449	-0.682915	1.19481e-07	-0.337774	0.07988	-1.02806	8.12461e-08	-0.501145	0.000871151	-0.864686	4.80279e-05	desmoglein 2 [Source:HGNC Symbol;Acc:HGNC:3049]
GEMIN8	ENSG00000046647	4.31313	0.155416	0.0339899	0.206119	0.0611177	0.104714	0.34977	0.246108	0.000504962	0.296811	0.004896	0.195405	0.05925	0.0906915	0.289507	0.401524	0.000594908	gem nuclear organelle associated protein 8 [Source:HGNC Symbol;Acc:HGNC:26044]
OFD1	ENSG00000046651	5.64177	0.0790388	0.339299	0.239994	0.0417366	-0.0819162	0.511521	0.00483979	0.957263	0.165795	0.16164	-0.156115	0.175452	-0.074199	0.426104	0.0838786	0.544469	OFD1 centriole and centriolar satellite protein [Source:HGNC Symbol;Acc:HGNC:2567]
GPM6B	ENSG00000046653	4.55318	-0.164575	0.306497	0.433801	0.0632926	-0.762951	0.000748227	-1.753	1.7292e-26	-1.15462	3.9581e-08	-2.35137	3.18053e-21	-1.58842	1.06815e-17	-1.91757	1.29172e-13	glycoprotein M6B [Source:HGNC Symbol;Acc:HGNC:4461]
PREX2	ENSG00000046889	3.26126	-1.26592	4.89267e-16	-1.42642	1.94255e-11	-1.10542	8.44642e-07	0.773681	1.21497e-07	0.61318	0.00514674	0.934183	4.10511e-06	2.0396	1.09026e-26	-0.492236	0.043957	phosphatidylinositol-3,4,5-trisphosphate dependent Rac exchange factor 2 [Source:HGNC Symbol;Acc:HGNC:22950]
WDR37	ENSG00000047056	4.82751	-0.132873	0.0788914	-0.0399739	0.75648	-0.225772	0.0396753	-0.307684	2.0132e-05	-0.214785	0.046763	-0.400583	0.000138458	-0.174811	0.0406556	-0.440557	0.000221943	WD repeat domain 37 [Source:HGNC Symbol;Acc:HGNC:31406]
YTHDC2	ENSG00000047188	5.45906	-0.457283	2.98625e-10	-0.608093	4.43365e-09	-0.306473	0.00361446	0.713896	7.2203e-22	0.563086	7.08195e-08	0.864706	1.50184e-17	1.17118	1.04577e-35	0.256613	0.0295905	YTH domain containing 2 [Source:HGNC Symbol;Acc:HGNC:24721]
CTPS2	ENSG00000047230	5.73634	-0.0127466	0.908225	-0.236528	0.0920949	0.211035	0.127198	0.303363	0.000860306	0.0795816	0.60294	0.527145	3.87761e-05	0.31611	0.00302519	0.290617	0.0583446	CTP synthase 2 [Source:HGNC Symbol;Acc:HGNC:2520]
ATP6V1H	ENSG00000047249	6.32493	0.663297	1.29156e-12	0.310529	0.0246116	1.01607	1.28171e-14	0.263609	0.00332633	-0.0891595	0.546759	0.616377	9.40328e-07	-0.399688	0.000135598	0.926906	6.90477e-10	ATPase H+ transporting V1 subunit H [Source:HGNC Symbol;Acc:HGNC:18303]
POLR2B	ENSG00000047315	7.09299	-0.220681	0.00749905	-0.415998	0.000466163	-0.0253629	0.857207	-0.345013	1.72878e-05	-0.540331	2.5009e-06	-0.149695	0.22169	-0.124332	0.19822	-0.565694	2.01417e-05	RNA polymerase II subunit B [Source:HGNC Symbol;Acc:HGNC:9188]
FAM214A	ENSG00000047346	6.27902	-1.0077	1.75433e-17	-1.37922	3.62439e-17	-0.636191	0.000128618	1.52974	3.16487e-34	1.15823	8.44e-12	1.90126	1.92283e-30	2.53745	1.32592e-52	0.522039	0.0043624	family with sequence similarity 214 member A [Source:HGNC Symbol;Acc:HGNC:25609]
ARAP2	ENSG00000047365	4.32556	-0.545616	2.43028e-05	-0.401832	0.0362249	-0.6894	0.000321122	-0.518079	4.3646e-05	-0.374295	0.0469488	-0.661863	0.000387909	0.0275365	0.865861	-1.0637	4.70642e-07	ArfGAP with RhoGAP domain, ankyrin repeat and PH domain 2 [Source:HGNC Symbol;Acc:HGNC:16924]
TPR	ENSG00000047410	7.75419	-0.371486	1.56848e-06	-0.300694	0.00819177	-0.442277	9.76255e-05	-0.2575	0.000692652	-0.186709	0.105353	-0.328292	0.00304871	0.113985	0.211815	-0.628986	5.46664e-07	translocated promoter region, nuclear basket protein [Source:HGNC Symbol;Acc:HGNC:12017]
CP	ENSG00000047457	6.81016	0.0594555	0.880399	-0.481056	0.365045	0.599967	0.233389	-2.52489	1.50492e-12	-3.0654	7.53737e-11	-1.98438	0.000119188	-2.58435	3.46478e-10	-2.46543	1.47044e-05	ceruloplasmin [Source:HGNC Symbol;Acc:HGNC:2295]
KIAA0556	ENSG00000047578	5.30237	-0.169566	0.0286716	-0.382074	0.000567136	0.042942	0.7376	0.737845	7.42684e-21	0.525337	2.16209e-06	0.950353	1.52849e-18	0.907411	3.57693e-22	0.568279	4.42639e-06	KIAA0556 [Source:HGNC Symbol;Acc:HGNC:29068]
DTNBP1	ENSG00000047579	4.56688	0.281558	0.000408252	0.333523	0.00521073	0.229592	0.0502334	-0.217551	0.00562571	-0.165585	0.16937	-0.269516	0.0191365	-0.499109	6.15541e-08	0.0640069	0.658924	dystrobrevin binding protein 1 [Source:HGNC Symbol;Acc:HGNC:17328]
XK	ENSG00000047597	2.0383	0.48234	0.0352484	-0.0327824	0.938156	0.997463	0.00171948	-1.4108	4.8352e-10	-1.92592	6.1034e-10	-0.895674	0.00678086	-1.89314	3.15926e-12	-0.928456	0.0119527	X-linked Kx blood group [Source:HGNC Symbol;Acc:HGNC:12811]
ANO2	ENSG00000047617	2.64645	0.671557	0.0311335	0.874983	0.0685084	0.468131	0.314182	2.00755	2.18629e-10	2.21098	4.76955e-06	1.80413	1.38555e-05	1.336	0.000174668	2.67911	3.6549e-07	anoctamin 2 [Source:HGNC Symbol;Acc:HGNC:1183]
C12orf4	ENSG00000047621	4.62143	-0.255472	0.0005183	-0.202669	0.0679651	-0.308275	0.0044152	-0.610199	2.42864e-16	-0.557396	6.62955e-08	-0.663002	5.01315e-10	-0.354727	2.78326e-05	-0.865671	1.34243e-12	chromosome 12 open reading frame 4 [Source:HGNC Symbol;Acc:HGNC:1184]
SCML1	ENSG00000047634	3.188	-0.256064	0.149994	0.0208577	0.949173	-0.532986	0.0389971	0.377712	0.0267421	0.654634	0.0104155	0.10079	0.712625	0.633776	0.00133743	0.121647	0.698395	Scm polycomb group protein like 1 [Source:HGNC Symbol;Acc:HGNC:10580]
WWC3	ENSG00000047644	6.29337	-0.246927	0.00725236	-0.418546	0.00162689	-0.0753076	0.615235	-0.273849	0.00230764	-0.445468	0.000566385	-0.102229	0.46841	-0.0269215	0.814167	-0.520776	0.000436474	WWC family member 3 [Source:HGNC Symbol;Acc:HGNC:29237]
ARHGAP6	ENSG00000047648	1.93912	-0.997886	5.85829e-13	-1.24304	1.1075e-10	-0.752734	0.00016127	0.207088	0.126545	-0.0380643	0.871462	0.452241	0.0168963	1.20497	5.66985e-14	-0.790798	0.000287962	Rho GTPase activating protein 6 [Source:HGNC Symbol;Acc:HGNC:676]
FAM184B	ENSG00000047662	0.972762	-0.118497	0.586389	-0.880874	0.00208834	0.64388	0.0239848	1.80358	5.63519e-18	1.04121	0.000448619	2.56596	9.39405e-20	1.92208	2.62158e-15	1.68509	3.22367e-07	family with sequence similarity 184 member B [Source:HGNC Symbol;Acc:HGNC:29235]
MAP4	ENSG00000047849	8.25226	-0.099389	0.128358	-0.136205	0.162543	-0.062573	0.539947	-0.157226	0.0118872	-0.194042	0.035678	-0.12041	0.200511	-0.0578369	0.447403	-0.256615	0.0129738	microtubule associated protein 4 [Source:HGNC Symbol;Acc:HGNC:6862]
GOPC	ENSG00000047932	5.83068	-0.321466	2.50684e-06	-0.401677	4.92188e-05	-0.241254	0.0168874	-0.332649	6.89068e-07	-0.41286	1.73391e-05	-0.252437	0.0101284	-0.0111829	0.897441	-0.654114	4.75909e-09	golgi associated PDZ and coiled-coil motif containing [Source:HGNC Symbol;Acc:HGNC:17643]
ROS1	ENSG00000047936	2.03509	-2.7927	1.30175e-12	-4.65995	5.62033e-18	-0.92544	0.101826	-4.76207	3.7756e-26	-6.62932	5.36034e-29	-2.89481	5.21317e-07	-1.96937	2.83424e-06	-7.55476	1.57306e-21	ROS proto-oncogene 1, receptor tyrosine kinase [Source:HGNC Symbol;Acc:HGNC:10261]
USP28	ENSG00000048028	4.8388	-0.260255	0.000498728	-0.266055	0.0161769	-0.254455	0.0217295	-0.476589	1.24917e-10	-0.482389	4.27246e-06	-0.470789	1.04435e-05	-0.216334	0.0121342	-0.736843	1.83489e-09	ubiquitin specific peptidase 28 [Source:HGNC Symbol;Acc:HGNC:12625]
HDAC9	ENSG00000048052	4.28449	-0.24156	0.281278	0.696729	0.0332582	-1.17985	0.000245989	-1.06071	4.60543e-07	-0.122422	0.732918	-1.999	1.07248e-09	-0.819151	0.000813728	-1.30227	0.000181377	histone deacetylase 9 [Source:HGNC Symbol;Acc:HGNC:14065]
TSPAN17	ENSG00000048140	5.69236	0.345666	0.000182077	0.267403	0.0581948	0.423929	0.00132543	-0.0847977	0.376905	-0.163061	0.249196	-0.00653432	0.967129	-0.430464	5.04786e-05	0.260868	0.0901845	tetraspanin 17 [Source:HGNC Symbol;Acc:HGNC:13594]
NOP16	ENSG00000048162	4.68233	0.894862	1.25334e-17	0.890985	4.00951e-09	0.898739	2.83221e-10	-0.629582	1.62191e-10	-0.633459	4.99746e-06	-0.625705	1.14976e-05	-1.52444	2.77146e-32	0.265281	0.109967	NOP16 nucleolar protein [Source:HGNC Symbol;Acc:HGNC:26934]
CC2D2A	ENSG00000048342	3.8272	-0.472644	1.9566e-06	-0.24217	0.108779	-0.703118	1.9417e-06	0.264518	0.00695245	0.494992	0.000649618	0.0340446	0.834151	0.737162	2.11955e-10	-0.208126	0.216533	coiled-coil and C2 domain containing 2A [Source:HGNC Symbol;Acc:HGNC:29253]
RRM2B	ENSG00000048392	5.78073	0.0946088	0.423363	-0.104409	0.567787	0.293627	0.0687637	0.55086	3.16271e-07	0.351841	0.0307104	0.749878	6.28778e-07	0.456251	0.000289076	0.645468	0.00028349	ribonucleotide reductase regulatory TP53 inducible subunit M2B [Source:HGNC Symbol;Acc:HGNC:17296]
ZNF800	ENSG00000048405	4.82948	-0.394578	2.21459e-07	-0.340412	0.00212842	-0.448743	5.75065e-05	0.212036	0.00464548	0.266202	0.0174815	0.157871	0.156348	0.606614	9.93598e-12	-0.182542	0.153114	zinc finger protein 800 [Source:HGNC Symbol;Acc:HGNC:27267]
TNFRSF17	ENSG00000048462	1.15357	0.108763	0.728817	-0.255843	0.578182	0.473369	0.25932	-0.867193	0.0015594	-1.2318	0.00144171	-0.502587	0.231794	-0.975956	0.00233675	-0.758431	0.102213	TNF receptor superfamily member 17 [Source:HGNC Symbol;Acc:HGNC:11913]
SNX29	ENSG00000048471	5.22134	-0.633196	6.90969e-14	-0.705191	2.60938e-09	-0.561202	3.79365e-06	0.0568835	0.511987	-0.0151108	0.917629	0.128878	0.294408	0.69008	9.73568e-13	-0.576313	1.45112e-05	sorting nexin 29 [Source:HGNC Symbol;Acc:HGNC:30542]
LMO3	ENSG00000048540	3.62367	1.02486	0.000845396	0.858344	0.071747	1.19137	0.00551136	-0.84276	0.0051057	-1.00927	0.0194237	-0.676247	0.138592	-1.86762	2.1958e-07	0.182097	0.74583	LIM domain only 3 [Source:HGNC Symbol;Acc:HGNC:6643]
MRPS10	ENSG00000048544	5.8059	0.0938198	0.188353	0.114759	0.292543	0.0728806	0.504424	-0.442257	6.51982e-11	-0.421318	1.15632e-05	-0.463196	2.03023e-06	-0.536077	1.999e-11	-0.348437	0.00167809	mitochondrial ribosomal protein S10 [Source:HGNC Symbol;Acc:HGNC:14502]
GUCA1A	ENSG00000048545	-2.59115	0.223822	0.360623	-0.118973	0.763247	0.566617	0.11068	-1.66461	2.13126e-12	-2.00741	4.78705e-10	-1.32182	0.000127209	-1.88844	1.74438e-11	-1.44079	0.000154871	guanylate cyclase activator 1A [Source:HGNC Symbol;Acc:HGNC:4678]
RSF1	ENSG00000048649	6.50662	-0.747865	1.37109e-10	-0.640214	0.000103772	-0.855517	6.41064e-07	0.0290585	0.819648	0.13671	0.457266	-0.0785931	0.666551	0.776924	5.70497e-09	-0.718807	0.000110124	remodeling and spacing factor 1 [Source:HGNC Symbol;Acc:HGNC:18118]
VPS13D	ENSG00000048707	6.64612	-0.543801	3.32659e-09	-0.64852	7.38809e-07	-0.439083	0.00104671	0.148717	0.104885	0.0439982	0.779137	0.253436	0.0520531	0.692518	8.1494e-11	-0.395084	0.00779272	vacuolar protein sorting 13 homolog D [Source:HGNC Symbol;Acc:HGNC:23595]
CELF2	ENSG00000048740	5.2332	-0.615269	3.45137e-05	-0.306926	0.179001	-0.923612	3.32896e-05	-0.613576	2.54448e-05	-0.305233	0.17156	-0.921919	1.9811e-05	0.00169369	0.9927	-1.22884	4.41652e-07	CUGBP Elav-like family member 2 [Source:HGNC Symbol;Acc:HGNC:2550]
FAM120A	ENSG00000048828	8.01657	-0.11569	0.0802363	-0.114548	0.258204	-0.116832	0.237968	0.40393	2.36474e-10	0.405072	1.38682e-05	0.402788	6.46105e-06	0.51962	6.04264e-12	0.28824	0.00602811	family with sequence similarity 120A [Source:HGNC Symbol;Acc:HGNC:13247]
R3HDM1	ENSG00000048991	5.61027	-0.174785	0.0143734	-0.271148	0.00921106	-0.0784217	0.488153	-0.691652	2.4046e-21	-0.788015	4.02663e-15	-0.595288	4.94338e-09	-0.516867	3.41454e-10	-0.866437	1.66316e-13	R3H domain containing 1 [Source:HGNC Symbol;Acc:HGNC:9757]
COL9A2	ENSG00000049089	5.07138	0.776997	0.000553237	0.795415	0.0212306	0.758578	0.0180582	0.551002	0.013052	0.569421	0.0960442	0.532583	0.0966962	-0.225995	0.399266	1.328	0.000307955	collagen type IX alpha 2 chain [Source:HGNC Symbol;Acc:HGNC:2218]
KITLG	ENSG00000049130	6.04525	-0.449245	0.00846287	-1.12546	3.08143e-06	0.226973	0.388906	1.8144	2.35127e-23	1.13818	6.77491e-06	2.49062	2.74338e-24	2.26365	3.78261e-25	1.36516	9.77764e-07	KIT ligand [Source:HGNC Symbol;Acc:HGNC:6343]
ERCC8	ENSG00000049167	3.00653	-0.350794	1.77499e-07	-0.402037	3.44726e-05	-0.29955	0.00230693	0.0265681	0.715878	-0.0246754	0.831614	0.0778117	0.447673	0.377362	1.04275e-06	-0.324225	0.00290102	ERCC excision repair 8, CSA ubiquitin ligase complex subunit [Source:HGNC Symbol;Acc:HGNC:3439]
ADAMTS6	ENSG00000049192	2.15693	-1.01894	2.01063e-11	-1.05393	6.1769e-07	-0.983957	1.0295e-05	0.472467	0.00120019	0.437482	0.0490118	0.507452	0.0149008	1.49141	1.22383e-16	-0.546474	0.0247616	ADAM metallopeptidase with thrombospondin type 1 motif 6 [Source:HGNC Symbol;Acc:HGNC:222]
H6PD	ENSG00000049239	6.67333	-0.23337	0.00307671	-0.0843866	0.515172	-0.382354	0.000913218	0.0100165	0.911303	0.159	0.187108	-0.138967	0.237879	0.243387	0.00716335	-0.223354	0.0877447	hexose-6-phosphate dehydrogenase/glucose 1-dehydrogenase [Source:HGNC Symbol;Acc:HGNC:4795]
VAMP3	ENSG00000049245	6.54453	-0.152177	0.0157333	-0.224533	0.0149792	-0.07982	0.417826	0.0750013	0.239762	0.00264477	0.981624	0.147358	0.103709	0.227178	0.00152701	-0.0771753	0.483306	vesicle associated membrane protein 3 [Source:HGNC Symbol;Acc:HGNC:12644]
PER3	ENSG00000049246	5.02431	-0.253252	0.0547205	-0.0518718	0.822373	-0.454633	0.0181343	0.550682	1.41155e-05	0.752063	7.48943e-05	0.349302	0.0584899	0.803935	8.22016e-08	0.29743	0.172139	period circadian regulator 3 [Source:HGNC Symbol;Acc:HGNC:8847]
UTS2	ENSG00000049247	-1.41632	-0.609693	0.0325063	-1.27846	0.00121531	0.0590766	0.904452	-1.08245	9.08378e-05	-1.75122	4.41774e-06	-0.413675	0.337471	-0.472752	0.148891	-1.69214	0.000246313	urotensin 2 [Source:HGNC Symbol;Acc:HGNC:12636]
TNFRSF9	ENSG00000049249	2.17652	-0.0943516	0.666188	-0.0331399	0.928292	-0.155563	0.630883	-1.14738	4.3548e-09	-1.08617	6.36897e-05	-1.2086	2.91747e-05	-1.05303	3.55637e-06	-1.24174	0.000107842	TNF receptor superfamily member 9 [Source:HGNC Symbol;Acc:HGNC:11924]
EPN3	ENSG00000049283	5.47366	0.145889	0.426142	-0.730902	0.00289598	1.02268	1.9014e-05	0.410664	0.0146999	-0.466127	0.0600317	1.28746	2.86155e-08	0.264775	0.185439	0.556553	0.0476804	epsin 3 [Source:HGNC Symbol;Acc:HGNC:18235]
LTBP1	ENSG00000049323	6.56191	-0.00752062	0.961942	-0.0433725	0.856805	0.0283313	0.902894	-0.971892	4.50503e-13	-1.00774	5.42605e-08	-0.93604	1.47617e-06	-0.964371	6.69787e-10	-0.979412	6.61157e-06	latent transforming growth factor beta binding protein 1 [Source:HGNC Symbol;Acc:HGNC:6714]
RCN1	ENSG00000049449	7.19372	-0.0348394	0.766119	0.043833	0.810746	-0.113512	0.489711	-0.65054	1.60838e-10	-0.571868	7.02389e-05	-0.729212	8.34817e-07	-0.6157	2.07423e-07	-0.685379	3.75168e-05	reticulocalbin 1 [Source:HGNC Symbol;Acc:HGNC:9934]
ELN	ENSG00000049540	7.19119	-0.122762	0.663519	0.639135	0.107441	-0.88466	0.0213252	-0.442007	0.0817308	0.31989	0.431396	-1.2039	0.00133128	-0.319245	0.287259	-0.56477	0.186441	elastin [Source:HGNC Symbol;Acc:HGNC:3327]
RFC2	ENSG00000049541	5.57717	0.239296	0.00521598	0.0145997	0.927588	0.463993	0.000130774	-0.806969	3.31104e-20	-1.03167	1.88519e-17	-0.582272	1.86567e-06	-1.04626	2.64928e-23	-0.567672	3.8642e-05	replication factor C subunit 2 [Source:HGNC Symbol;Acc:HGNC:9970]
ARID1B	ENSG00000049618	6.64479	-0.232648	0.00198989	-0.097878	0.421761	-0.367418	0.000850041	-0.0600738	0.44481	0.0746962	0.542103	-0.194844	0.0757636	0.172574	0.0477255	-0.292722	0.0173312	AT-rich interaction domain 1B [Source:HGNC Symbol;Acc:HGNC:18040]
CLPTM1L	ENSG00000049656	7.23925	0.366558	2.39843e-06	0.271735	0.020599	0.461382	3.09462e-05	-0.388816	3.41132e-07	-0.48364	9.12898e-06	-0.293993	0.00845945	-0.755375	3.8549e-16	-0.0222577	0.881258	CLPTM1 like [Source:HGNC Symbol;Acc:HGNC:24308]
NEDD4L	ENSG00000049759	6.37979	0.044281	0.731961	-0.146785	0.427242	0.235347	0.169655	1.10573	1.16174e-20	0.914666	6.11469e-08	1.2968	4.27673e-16	1.06145	7.07644e-15	1.15001	1.12085e-09	NEDD4 like E3 ubiquitin protein ligase [Source:HGNC Symbol;Acc:HGNC:7728]
FOXP3	ENSG00000049768	2.93224	0.0980072	0.579933	0.0398407	0.892816	0.156174	0.544095	-0.71847	5.24141e-06	-0.776637	0.000554793	-0.660304	0.00463422	-0.816477	1.04092e-05	-0.620463	0.0184293	forkhead box P3 [Source:HGNC Symbol;Acc:HGNC:6106]
PPP1R3F	ENSG00000049769	2.69473	0.695022	1.35799e-07	0.408644	0.0411408	0.981401	1.21705e-07	0.0806909	0.562754	-0.205688	0.309096	0.36707	0.049243	-0.614331	4.57211e-05	0.775713	0.000269947	protein phosphatase 1 regulatory subunit 3F [Source:HGNC Symbol;Acc:HGNC:14944]
HEXB	ENSG00000049860	6.91155	-0.17581	0.0213444	-0.181022	0.115874	-0.170597	0.135169	0.0186559	0.824378	0.0134431	0.92025	0.0238687	0.847851	0.194465	0.0257947	-0.157154	0.219558	hexosaminidase subunit beta [Source:HGNC Symbol;Acc:HGNC:4879]
PTCD2	ENSG00000049883	3.72627	-0.301626	3.31316e-06	-0.427294	5.33502e-06	-0.175957	0.0703257	0.464676	7.35439e-13	0.339008	0.000318963	0.590345	6.24063e-11	0.766302	5.21598e-22	0.163051	0.134201	pentatricopeptide repeat domain 2 [Source:HGNC Symbol;Acc:HGNC:25734]
NEXMIF	ENSG00000050030	2.28072	-0.511979	0.0257328	-0.825292	0.012041	-0.198666	0.59147	-0.108077	0.657723	-0.42139	0.216767	0.205236	0.557948	0.403902	0.127204	-0.620056	0.100614	neurite extension and migration factor [Source:HGNC Symbol;Acc:HGNC:29433]
JKAMP	ENSG00000050130	5.47395	-0.285935	0.000159637	-0.503629	4.1939e-06	-0.0682415	0.580581	0.508663	1.539e-11	0.290969	0.00895772	0.726357	5.68892e-12	0.794598	3.56401e-18	0.222728	0.0772665	JNK1/MAPK8 associated membrane protein [Source:HGNC Symbol;Acc:HGNC:20184]
DKK3	ENSG00000050165	5.72535	-0.355425	0.00832368	-0.399256	0.0447493	-0.311594	0.12507	0.349668	0.00813057	0.305837	0.133756	0.393499	0.038399	0.705093	4.9413e-06	-0.00575688	0.982222	dickkopf WNT signaling pathway inhibitor 3 [Source:HGNC Symbol;Acc:HGNC:2893]
ARHGEF5	ENSG00000050327	4.23355	0.136999	0.163851	0.161702	0.283979	0.112295	0.45198	-0.200066	0.0335958	-0.175363	0.224081	-0.224769	0.10643	-0.337065	0.00194367	-0.0630676	0.717037	Rho guanine nucleotide exchange factor 5 [Source:HGNC Symbol;Acc:HGNC:13209]
NFE2L3	ENSG00000050344	5.53788	0.304543	0.033288	0.535384	0.0122212	0.0737007	0.755403	-1.36754	1.33607e-20	-1.1367	5.75792e-09	-1.59838	1.1082e-13	-1.67208	1.32037e-21	-1.063	3.62014e-06	nuclear factor, erythroid 2 like 3 [Source:HGNC Symbol;Acc:HGNC:7783]
MCUR1	ENSG00000050393	5.80857	0.114333	0.156637	0.0569262	0.669466	0.171741	0.140017	-0.56436	3.53708e-13	-0.621768	1.10306e-08	-0.506953	5.0105e-06	-0.678694	1.37694e-13	-0.450027	0.000348432	mitochondrial calcium uniporter regulator 1 [Source:HGNC Symbol;Acc:HGNC:21097]
LIMA1	ENSG00000050405	6.93901	-0.745313	2.88234e-13	-1.13408	3.91101e-15	-0.35655	0.0154409	0.70838	1.01728e-12	0.319616	0.0302096	1.09714	2.54433e-15	1.45369	4.58966e-30	-0.0369335	0.844504	LIM domain and actin binding 1 [Source:HGNC Symbol;Acc:HGNC:24636]
LETMD1	ENSG00000050426	5.43654	0.0231914	0.730702	0.0031899	0.979531	0.043193	0.66052	0.490395	2.97869e-16	0.470393	4.91351e-08	0.510396	6.36093e-10	0.467203	1.79938e-11	0.513586	1.09393e-07	LETM1 domain containing 1 [Source:HGNC Symbol;Acc:HGNC:24241]
SLC4A8	ENSG00000050438	4.53673	-1.00598	1.65161e-08	-1.82527	5.43951e-13	-0.186687	0.509138	2.50651	2.11356e-34	1.68722	4.84014e-10	3.3258	6.89968e-35	3.51249	3.79087e-42	1.50053	2.44113e-07	solute carrier family 4 member 8 [Source:HGNC Symbol;Acc:HGNC:11034]
LAMC3	ENSG00000050555	2.62213	0.935373	5.67709e-05	1.55413	1.72082e-05	0.316618	0.375218	-0.915738	5.69272e-05	-0.296983	0.411344	-1.53449	8.86724e-06	-1.85111	2.28373e-11	0.0196352	0.965531	laminin subunit gamma 3 [Source:HGNC Symbol;Acc:HGNC:6494]
PTGER3	ENSG00000050628	5.13093	-0.426238	0.0290295	-0.850923	0.00212726	-0.00155247	0.996556	2.84185	2.97638e-35	2.41716	1.18282e-14	3.26653	9.89892e-30	3.26809	5.27367e-34	2.41561	4.88171e-13	prostaglandin E receptor 3 [Source:HGNC Symbol;Acc:HGNC:9595]
TNIP3	ENSG00000050730	0.450561	-0.126608	0.65584	0.274492	0.518021	-0.527708	0.188032	-2.6704	4.12698e-21	-2.2693	1.50289e-10	-3.0715	4.68188e-13	-2.54379	1.60995e-15	-2.79701	3.77765e-10	TNFAIP3 interacting protein 3 [Source:HGNC Symbol;Acc:HGNC:19315]
MAPK9	ENSG00000050748	5.94551	-0.249041	0.000681756	-0.385069	0.000297303	-0.113014	0.322424	0.394068	4.74718e-08	0.25804	0.0169473	0.530095	1.71464e-07	0.643109	1.15578e-13	0.145027	0.24599	mitogen-activated protein kinase 9 [Source:HGNC Symbol;Acc:HGNC:6886]
COL23A1	ENSG00000050767	1.24208	0.949847	5.34584e-07	1.31012	6.23959e-06	0.589574	0.0299012	-1.04869	1.80272e-08	-0.688412	0.00991749	-1.40896	4.44863e-07	-1.99853	6.7862e-18	-0.098838	0.776936	collagen type XXIII alpha 1 chain [Source:HGNC Symbol;Acc:HGNC:22990]
BCAR1	ENSG00000050820	6.00019	0.378764	0.000317055	0.262958	0.106104	0.494571	0.000971821	-0.0968927	0.374768	-0.212699	0.181037	0.0189136	0.914195	-0.475657	8.33619e-05	0.281872	0.108761	BCAR1 scaffold protein, Cas family member [Source:HGNC Symbol;Acc:HGNC:971]
FAM160A2	ENSG00000051009	5.11864	0.129921	0.0367085	0.188946	0.0415652	0.0708956	0.463822	0.292004	1.11518e-06	0.351029	7.17838e-05	0.232978	0.00688804	0.162083	0.0217828	0.421925	2.00348e-05	family with sequence similarity 160 member A2 [Source:HGNC Symbol;Acc:HGNC:25378]
HERPUD1	ENSG00000051108	7.01905	-0.0650218	0.497988	-0.224362	0.0919138	0.0943184	0.500644	-0.165069	0.0603251	-0.324409	0.0102012	-0.00572892	0.969623	-0.100047	0.339298	-0.230091	0.117089	homocysteine inducible ER protein with ubiquitin like domain 1 [Source:HGNC Symbol;Acc:HGNC:13744]
HOMER3	ENSG00000051128	5.57571	0.835907	1.96451e-10	1.03145	1.67261e-07	0.640364	0.000460245	-1.05991	6.19219e-16	-0.864369	1.38113e-06	-1.25545	6.25008e-11	-1.89582	8.57371e-30	-0.224005	0.312195	homer scaffold protein 3 [Source:HGNC Symbol;Acc:HGNC:17514]
RAD51	ENSG00000051180	3.6702	0.644847	8.74595e-09	0.37568	0.0257806	0.914015	7.63936e-09	-0.929526	1.6657e-16	-1.19869	1.58715e-14	-0.660359	3.52738e-05	-1.57437	1.31811e-28	-0.284679	0.125284	RAD51 recombinase [Source:HGNC Symbol;Acc:HGNC:9817]
POLQ	ENSG00000051341	3.47374	0.194969	0.147771	-0.0936041	0.672881	0.483543	0.00964997	-1.0485	1.85645e-15	-1.33708	1.94152e-13	-0.759931	5.20453e-05	-1.24347	1.60195e-15	-0.853536	5.22102e-05	DNA polymerase theta [Source:HGNC Symbol;Acc:HGNC:9186]
PIK3CB	ENSG00000051382	5.9209	-0.146452	0.0903211	-0.129796	0.332482	-0.163107	0.205398	-0.152884	0.0696456	-0.136228	0.294259	-0.169539	0.174926	-0.00643158	0.952069	-0.299335	0.0304218	phosphatidylinositol-4,5-bisphosphate 3-kinase catalytic subunit beta [Source:HGNC Symbol;Acc:HGNC:8976]
CYBA	ENSG00000051523	6.46683	0.924151	1.39921e-08	0.945672	0.000111045	0.902629	6.60168e-05	-0.330367	0.0388346	-0.308845	0.203392	-0.351888	0.140167	-1.25452	3.7011e-11	0.593784	0.0245205	cytochrome b-245 alpha chain [Source:HGNC Symbol;Acc:HGNC:2577]
THOC3	ENSG00000051596	3.57505	0.472976	2.19661e-06	0.387986	0.00989606	0.557966	8.22818e-05	-0.245407	0.0128962	-0.330397	0.0221189	-0.160417	0.286644	-0.718383	6.56347e-10	0.227569	0.17647	THO complex 3 [Source:HGNC Symbol;Acc:HGNC:19072]
HEBP2	ENSG00000051620	6.89695	0.330579	0.000768571	0.48732	0.00092082	0.173838	0.245151	-0.735535	8.42427e-14	-0.578794	2.57358e-05	-0.892275	5.123e-10	-1.06611	3.88772e-19	-0.404955	0.0116005	heme binding protein 2 [Source:HGNC Symbol;Acc:HGNC:15716]
MPHOSPH9	ENSG00000051825	4.17528	-0.477221	1.19358e-05	-0.491322	0.00190119	-0.46312	0.00404123	-0.0700464	0.54504	-0.0841474	0.640454	-0.0559454	0.750791	0.407175	0.00116129	-0.547268	0.00200714	M-phase phosphoprotein 9 [Source:HGNC Symbol;Acc:HGNC:7215]
PLEKHA5	ENSG00000052126	5.11961	-0.280813	0.00529407	-0.277182	0.0655984	-0.284445	0.0582733	-0.236265	0.0172646	-0.232634	0.119889	-0.239897	0.103544	0.0445477	0.719443	-0.517079	0.00147705	pleckstrin homology domain containing A5 [Source:HGNC Symbol;Acc:HGNC:30036]
PRSS8	ENSG00000052344	7.81765	0.270906	0.0822286	0.0711068	0.791104	0.470706	0.032777	0.194626	0.208409	-0.00517322	0.98558	0.394426	0.0693556	-0.07628	0.683248	0.465533	0.0647676	serine protease 8 [Source:HGNC Symbol;Acc:HGNC:9491]
SIKE1	ENSG00000052723	5.49487	-0.159034	0.0152246	-0.136398	0.173876	-0.181671	0.0610338	-0.513245	3.46208e-15	-0.490608	7.08352e-08	-0.535882	8.62293e-09	-0.35421	2.09854e-06	-0.672279	2.71179e-10	suppressor of IKBKE 1 [Source:HGNC Symbol;Acc:HGNC:26119]
RRP12	ENSG00000052749	5.84236	0.464407	1.02231e-08	0.389924	0.00116893	0.538891	2.61847e-06	-0.28191	0.00035244	-0.356394	0.00186782	-0.207427	0.0777744	-0.746318	5.83933e-15	0.182497	0.178962	ribosomal RNA processing 12 homolog [Source:HGNC Symbol;Acc:HGNC:29100]
FNIP2	ENSG00000052795	5.09744	-0.656182	1.80687e-10	-0.976401	2.45209e-11	-0.335962	0.0259576	-0.107964	0.300519	-0.428184	0.0030006	0.212255	0.152005	0.548217	2.73469e-06	-0.764146	3.41382e-06	folliculin interacting protein 2 [Source:HGNC Symbol;Acc:HGNC:29280]
MSMO1	ENSG00000052802	6.04483	0.0516079	0.717161	-0.451254	0.0147624	0.554469	0.00202243	-0.267201	0.0329766	-0.770063	1.14413e-05	0.23566	0.203342	-0.318809	0.0287178	-0.215593	0.320494	methylsterol monooxygenase 1 [Source:HGNC Symbol;Acc:HGNC:10545]
TTC17	ENSG00000052841	6.64329	-0.188515	0.00906452	-0.222406	0.0379556	-0.154624	0.155796	0.0701079	0.344684	0.0362169	0.76894	0.103999	0.335523	0.258623	0.00170725	-0.118407	0.339244	tetratricopeptide repeat domain 17 [Source:HGNC Symbol;Acc:HGNC:25596]
ALX4	ENSG00000052850	2.28463	0.417294	0.211028	1.44901	0.00375688	-0.614418	0.216528	-1.51331	2.14896e-06	-0.481594	0.323551	-2.54502	4.51876e-07	-1.9306	3.27177e-07	-1.09601	0.0383925	ALX homeobox 4 [Source:HGNC Symbol;Acc:HGNC:450]
FSTL4	ENSG00000053108	2.01608	-0.110453	0.697021	-0.40732	0.304494	0.186414	0.653084	0.963865	0.000116038	0.666999	0.084321	1.26073	0.000263016	1.07432	0.000245122	0.853412	0.0416834	follistatin like 4 [Source:HGNC Symbol;Acc:HGNC:21389]
FOXN3	ENSG00000053254	5.78016	-0.575159	2.00881e-10	-0.623873	1.15869e-06	-0.526446	6.11375e-05	-0.204168	0.0209505	-0.252882	0.0531636	-0.155455	0.245436	0.370991	0.000294147	-0.779328	8.45118e-08	forkhead box N3 [Source:HGNC Symbol;Acc:HGNC:1928]
METTL24	ENSG00000053328	-1.12473	-1.0766	1.83635e-09	-1.30908	1.61994e-07	-0.844131	0.00133588	-0.14201	0.441237	-0.374483	0.152251	0.0904633	0.750068	0.934594	4.49902e-06	-1.21861	2.16364e-05	methyltransferase like 24 [Source:HGNC Symbol;Acc:HGNC:21566]
AKR7A2	ENSG00000053371	5.73036	0.401097	1.14926e-05	0.262319	0.0606642	0.539876	3.28744e-05	0.537362	2.7325e-09	0.398584	0.00292202	0.676141	8.05555e-08	0.136265	0.20656	0.938459	4.91962e-10	aldo-keto reductase family 7 member A2 [Source:HGNC Symbol;Acc:HGNC:389]
MRTO4	ENSG00000053372	5.80227	0.57652	3.10299e-11	0.453761	0.000368901	0.699279	1.00582e-08	-0.500352	2.7449e-09	-0.623112	1.72623e-07	-0.377593	0.00200135	-1.07687	2.54899e-24	0.0761672	0.621173	MRT4 homolog, ribosome maturation factor [Source:HGNC Symbol;Acc:HGNC:18477]
NNAT	ENSG00000053438	0.684255	-0.951893	1.93868e-05	-0.833694	0.0095875	-1.07009	0.00136899	0.777057	0.0003752	0.895256	0.00702265	0.658858	0.0350998	1.72895	6.56681e-11	-0.174837	0.664347	neuronatin [Source:HGNC Symbol;Acc:HGNC:7860]
USE1	ENSG00000053501	4.40226	0.637593	1.25244e-09	0.792936	4.2334e-07	0.48225	0.00110487	-0.0523739	0.639159	0.102969	0.542895	-0.207717	0.177971	-0.689967	9.83706e-09	0.585219	0.000508214	unconventional SNARE in the ER 1 [Source:HGNC Symbol;Acc:HGNC:30882]
MCF2L2	ENSG00000053524	0.154376	-0.209166	0.246294	-0.103214	0.726369	-0.315118	0.23817	-1.63664	1.05278e-19	-1.53069	1.21293e-10	-1.74259	3.24339e-11	-1.42747	2.85811e-12	-1.84581	1.73083e-10	MCF.2 cell line derived transforming sequence-like 2 [Source:HGNC Symbol;Acc:HGNC:30319]
NRIP2	ENSG00000053702	2.29486	-0.269989	0.0112588	-0.0991573	0.574809	-0.440821	0.00472283	0.603837	7.27127e-09	0.774668	5.88446e-07	0.433005	0.00337223	0.873826	2.31797e-12	0.333847	0.0563781	nuclear receptor interacting protein 2 [Source:HGNC Symbol;Acc:HGNC:23078]
LAMA3	ENSG00000053747	5.63173	-0.198041	0.418903	-0.0281998	0.948135	-0.367882	0.300895	1.06425	2.38396e-06	1.23409	0.000322892	0.894406	0.00448521	1.26229	1.94824e-06	0.866207	0.020836	laminin subunit alpha 3 [Source:HGNC Symbol;Acc:HGNC:6483]
AP5M1	ENSG00000053770	5.51855	-0.462427	1.40498e-09	-0.612775	1.93554e-08	-0.312078	0.00503763	0.0730574	0.350739	-0.0772908	0.527175	0.223406	0.038756	0.535484	1.16548e-09	-0.389369	0.00151047	adaptor related protein complex 5 subunit mu 1 [Source:HGNC Symbol;Acc:HGNC:20192]
ANAPC4	ENSG00000053900	4.66635	0.00922835	0.889012	0.16034	0.0591732	-0.141884	0.0904071	0.169468	0.00201819	0.32058	6.97005e-05	0.0183562	0.841058	0.16024	0.0127811	0.178697	0.0528215	anaphase promoting complex subunit 4 [Source:HGNC Symbol;Acc:HGNC:19990]
KCNQ1	ENSG00000053918	3.55259	-0.215174	0.122264	-0.408716	0.0413748	-0.021633	0.927336	-0.121514	0.385656	-0.315055	0.116103	0.0720279	0.738812	0.0936609	0.567648	-0.336688	0.136217	potassium voltage-gated channel subfamily Q member 1 [Source:HGNC Symbol;Acc:HGNC:6294]
TRAPPC3	ENSG00000054116	6.11416	0.397784	5.7062e-10	0.420764	8.37287e-06	0.374804	3.56212e-05	-0.358596	9.52098e-09	-0.335616	0.000186177	-0.381576	2.39816e-05	-0.75638	2.21917e-22	0.0391884	0.73841	trafficking protein particle complex 3 [Source:HGNC Symbol;Acc:HGNC:19942]
THRAP3	ENSG00000054118	7.60954	-0.161393	0.00108813	-0.210607	0.00367001	-0.112179	0.13268	0.0472591	0.355642	-0.00195494	0.98292	0.0964731	0.185307	0.208652	0.000234584	-0.114134	0.170483	thyroid hormone receptor associated protein 3 [Source:HGNC Symbol;Acc:HGNC:22964]
PHPT1	ENSG00000054148	5.91368	0.702783	8.17314e-09	0.648822	0.000352052	0.756744	9.35813e-06	0.689721	7.35234e-09	0.63576	0.000328848	0.743682	7.15773e-06	-0.013062	0.932188	1.3925	5.46435e-12	phosphohistidine phosphatase 1 [Source:HGNC Symbol;Acc:HGNC:30033]
ENTPD2	ENSG00000054179	4.24373	0.216113	0.296245	-0.62376	0.0301441	1.05599	0.000122112	-0.887533	4.12073e-06	-1.72741	1.71913e-10	-0.0476599	0.884345	-1.10365	1.18329e-06	-0.67142	0.0374057	ectonucleoside triphosphate diphosphohydrolase 2 [Source:HGNC Symbol;Acc:HGNC:3364]
LY75	ENSG00000054219	3.83063	-0.0819704	0.648981	0.371868	0.140695	-0.535808	0.0271161	-0.85832	7.68402e-08	-0.404481	0.0893968	-1.31216	4.52463e-08	-0.776349	3.08011e-05	-0.94029	0.000352329	lymphocyte antigen 75 [Source:HGNC Symbol;Acc:HGNC:6729]
ARID4B	ENSG00000054267	6.39548	-0.35777	1.62604e-05	-0.310287	0.0112525	-0.405254	0.00089458	0.208987	0.0109647	0.256471	0.0377035	0.161504	0.186406	0.566758	4.31709e-09	-0.148783	0.296698	AT-rich interaction domain 4B [Source:HGNC Symbol;Acc:HGNC:15550]
OPN3	ENSG00000054277	3.71579	-0.27975	0.0396785	-0.396873	0.0458566	-0.162627	0.444234	-1.27056	5.48994e-20	-1.38769	1.17989e-13	-1.15344	5.00349e-09	-0.990813	2.50485e-10	-1.55031	4.67832e-12	opsin 3 [Source:HGNC Symbol;Acc:HGNC:14007]
SDCCAG8	ENSG00000054282	5.034	-0.102621	0.149805	0.12563	0.247704	-0.330872	0.00100292	0.00444046	0.955737	0.232691	0.0216038	-0.22381	0.0239973	0.107061	0.185463	-0.0981805	0.413107	serologically defined colon cancer antigen 8 [Source:HGNC Symbol;Acc:HGNC:10671]
PTPRN	ENSG00000054356	1.15185	0.880596	0.00455534	0.677538	0.164309	1.08365	0.0129069	0.117882	0.72426	-0.0851761	0.87391	0.32094	0.492075	-0.762714	0.0322233	0.998478	0.0504624	protein tyrosine phosphatase receptor type N [Source:HGNC Symbol;Acc:HGNC:9676]
HHAT	ENSG00000054392	4.4291	-0.509309	2.95048e-06	-0.708397	5.90243e-06	-0.310222	0.0575129	1.28358	6.6146e-28	1.0845	3.28444e-11	1.48267	1.2549e-21	1.79289	2.72198e-35	0.774274	1.21252e-05	hedgehog acyltransferase [Source:HGNC Symbol;Acc:HGNC:18270]
KIF1B	ENSG00000054523	6.4217	-0.245761	0.00530029	-0.402877	0.00157833	-0.0886452	0.53141	-0.716952	5.91624e-16	-0.874068	1.35036e-12	-0.559836	8.31358e-06	-0.471191	3.06949e-06	-0.962713	3.00814e-11	kinesin family member 1B [Source:HGNC Symbol;Acc:HGNC:16636]
FOXC1	ENSG00000054598	5.75691	0.230327	0.231808	0.718891	0.0103423	-0.258237	0.37374	-3.52584	1.42766e-48	-3.03728	2.79501e-28	-4.01441	2.39139e-31	-3.75617	4.56588e-43	-3.29551	4.87874e-22	forkhead box C1 [Source:HGNC Symbol;Acc:HGNC:3800]
TBC1D22A	ENSG00000054611	5.09884	0.314712	8.73111e-06	0.302624	0.00425173	0.326801	0.00128004	-0.0936365	0.194073	-0.105725	0.337714	-0.0815482	0.45394	-0.408349	5.69169e-07	0.221076	0.0594963	TBC1 domain family member 22A [Source:HGNC Symbol;Acc:HGNC:1309]
SYNE2	ENSG00000054654	7.30761	-0.585218	5.82996e-08	-0.478754	0.00212105	-0.691682	1.42238e-05	-0.23929	0.0246116	-0.132826	0.434517	-0.345754	0.0263268	0.345928	0.00509856	-0.824508	2.24547e-06	spectrin repeat containing nuclear envelope protein 2 [Source:HGNC Symbol;Acc:HGNC:17084]
PLEKHH1	ENSG00000054690	3.9857	-0.14425	0.343023	-0.429155	0.0429744	0.140656	0.53867	0.235597	0.100859	-0.049309	0.841759	0.520502	0.00920915	0.379846	0.0213062	0.0913468	0.728423	pleckstrin homology, MyTH4 and FERM domain containing H1 [Source:HGNC Symbol;Acc:HGNC:17733]
ATP9A	ENSG00000054793	7.18281	0.0670413	0.588124	-0.160273	0.371952	0.294356	0.0746324	0.316228	0.00416883	0.0889137	0.632406	0.543542	0.000460584	0.249187	0.0553597	0.383269	0.0379503	ATPase phospholipid transporting 9A (putative) [Source:HGNC Symbol;Acc:HGNC:13540]
CBLN4	ENSG00000054803	-0.0489668	-0.934685	2.07537e-05	-0.45371	0.176097	-1.41566	2.16952e-05	1.38192	3.43003e-10	1.86289	3.36725e-08	0.900943	0.00290927	2.3166	1.95087e-17	0.447233	0.228081	cerebellin 4 precursor [Source:HGNC Symbol;Acc:HGNC:16231]
CHRDL2	ENSG00000054938	2.68122	1.02162	0.00560104	2.91439	2.00956e-06	-0.87115	0.121814	-0.717593	0.0483957	1.17518	0.0357988	-2.61036	5.8321e-06	-1.73921	4.46293e-05	0.304027	0.643878	chordin like 2 [Source:HGNC Symbol;Acc:HGNC:24168]
FAM168A	ENSG00000054965	6.64684	-0.226598	0.00280492	-0.111439	0.35742	-0.341756	0.00207822	-0.0974498	0.205977	0.0177089	0.894585	-0.212608	0.0532703	0.129148	0.145183	-0.324047	0.00856841	family with sequence similarity 168 member A [Source:HGNC Symbol;Acc:HGNC:28999]
RELT	ENSG00000054967	3.3596	0.429964	4.96645e-06	0.462591	0.00101683	0.397337	0.00325827	-0.73905	6.35883e-15	-0.706423	7.59447e-08	-0.771678	1.52452e-08	-1.16901	1.22783e-23	-0.309086	0.046677	RELT TNF receptor [Source:HGNC Symbol;Acc:HGNC:13764]
GALC	ENSG00000054983	5.31286	-0.637424	3.55921e-12	-0.743521	8.64317e-09	-0.531327	5.79256e-05	0.408586	3.45954e-06	0.302489	0.0226503	0.514684	3.36196e-05	1.04601	2.03701e-21	-0.228837	0.127872	galactosylceramidase [Source:HGNC Symbol;Acc:HGNC:4115]
NOP58	ENSG00000055044	6.65826	0.246006	0.000312295	0.125663	0.244672	0.366348	0.000171175	-0.659885	6.12743e-21	-0.780227	9.55258e-16	-0.539543	3.58978e-08	-0.905891	2.18916e-26	-0.413879	0.000180531	NOP58 ribonucleoprotein [Source:HGNC Symbol;Acc:HGNC:29926]
SZRD1	ENSG00000055070	7.06075	0.237196	0.000129734	0.180666	0.0558028	0.293726	0.000965302	-0.240632	7.55069e-05	-0.297162	0.000759833	-0.184102	0.0406764	-0.477829	4.31532e-11	-0.00343598	0.977494	SUZ RNA binding domain containing 1 [Source:HGNC Symbol;Acc:HGNC:30232]
KCNH2	ENSG00000055118	2.8013	1.07099	0.000202875	0.606458	0.180865	1.53552	0.000118609	-0.51416	0.0721295	-0.978693	0.0156434	-0.0496274	0.917121	-1.58515	2.2057e-06	0.556831	0.252875	potassium voltage-gated channel subfamily H member 2 [Source:HGNC Symbol;Acc:HGNC:6251]
CUL1	ENSG00000055130	6.50021	0.114323	0.0582784	0.132324	0.149314	0.0963216	0.289107	-0.428624	3.53708e-13	-0.410623	7.58121e-07	-0.446625	1.18575e-07	-0.542947	8.67899e-15	-0.314301	0.00103073	cullin 1 [Source:HGNC Symbol;Acc:HGNC:2551]
FAM114A2	ENSG00000055147	4.6514	-0.401057	2.93238e-10	-0.418036	4.35162e-06	-0.384078	3.1019e-05	0.698976	4.91227e-26	0.681997	2.6236e-13	0.715955	6.6382e-16	1.10003	1.8359e-39	0.297919	0.00359181	family with sequence similarity 114 member A2 [Source:HGNC Symbol;Acc:HGNC:1333]
CYFIP2	ENSG00000055163	5.41394	-0.00401461	0.98286	-0.0955512	0.719933	0.087522	0.734935	1.06772	6.563e-12	0.976188	2.05857e-05	1.15926	4.12954e-08	1.07174	3.18008e-09	1.06371	2.51084e-05	cytoplasmic FMR1 interacting protein 2 [Source:HGNC Symbol;Acc:HGNC:13760]
TAB2	ENSG00000055208	6.83989	-0.397835	5.55109e-07	-0.46952	4.27795e-05	-0.326151	0.00524193	-0.235786	0.00252555	-0.30747	0.00694563	-0.164101	0.163062	0.16205	0.0797327	-0.633621	8.66621e-07	TGF-beta activated kinase 1 (MAP3K7) binding protein 2 [Source:HGNC Symbol;Acc:HGNC:17075]
GINM1	ENSG00000055211	5.80774	-0.273531	6.76777e-05	-0.352517	0.000417724	-0.194545	0.0584256	0.0651603	0.360649	-0.0138257	0.909888	0.144146	0.152591	0.338692	1.8444e-05	-0.208371	0.0677213	glycoprotein integral membrane 1 [Source:HGNC Symbol;Acc:HGNC:21074]
EIF2AK2	ENSG00000055332	7.0038	-0.241221	0.0130231	-0.267397	0.0644717	-0.215044	0.140923	-0.32053	0.000690314	-0.346707	0.0122629	-0.294353	0.0351783	-0.0793093	0.495406	-0.561751	0.000316066	eukaryotic translation initiation factor 2 alpha kinase 2 [Source:HGNC Symbol;Acc:HGNC:9437]
USP36	ENSG00000055483	6.17856	0.415706	2.45794e-09	0.418071	4.82265e-05	0.413341	2.75287e-05	-0.170088	0.0127795	-0.167723	0.103341	-0.172453	0.0879323	-0.585794	5.71272e-13	0.245619	0.0306004	ubiquitin specific peptidase 36 [Source:HGNC Symbol;Acc:HGNC:20062]
KMT2C	ENSG00000055609	7.03664	-0.742447	2.0776e-11	-0.69853	7.47009e-06	-0.786365	1.27392e-06	0.148929	0.177391	0.192847	0.252477	0.105011	0.532345	0.891376	3.44486e-12	-0.593518	0.000760889	lysine methyltransferase 2C [Source:HGNC Symbol;Acc:HGNC:13726]
MCOLN3	ENSG00000055732	2.6052	0.0071684	0.978766	-0.421928	0.22309	0.436264	0.193766	-0.676197	0.00222037	-1.10529	0.000397047	-0.247102	0.477064	-0.683366	0.00825787	-0.669029	0.0726256	mucolipin 3 [Source:HGNC Symbol;Acc:HGNC:13358]
CCDC85A	ENSG00000055813	-0.330633	-0.333106	0.109752	-0.268498	0.409745	-0.397713	0.200022	0.986877	8.00809e-07	1.05148	0.000495082	0.92227	0.000915093	1.31998	2.49197e-08	0.653771	0.0507116	coiled-coil domain containing 85A [Source:HGNC Symbol;Acc:HGNC:29400]
PUM2	ENSG00000055917	7.56607	-0.163995	0.00555013	-0.190232	0.0301647	-0.137757	0.120809	0.0116975	0.859899	-0.0145398	0.888315	0.0379348	0.685345	0.175692	0.00953859	-0.152297	0.121786	pumilio RNA binding family member 2 [Source:HGNC Symbol;Acc:HGNC:14958]
MRPL43	ENSG00000055950	5.68282	0.332469	5.42767e-05	0.229126	0.0694078	0.435812	0.00020614	0.295212	0.000261421	0.191868	0.124939	0.398555	0.000512419	-0.0372574	0.715021	0.627681	2.72245e-06	mitochondrial ribosomal protein L43 [Source:HGNC Symbol;Acc:HGNC:14517]
ITIH4	ENSG00000055955	-1.0883	-0.32087	0.0542813	-0.40668	0.0992764	-0.235061	0.360391	0.274507	0.0947389	0.188697	0.472658	0.360317	0.129348	0.595377	0.00153834	-0.0463633	0.882329	inter-alpha-trypsin inhibitor heavy chain 4 [Source:HGNC Symbol;Acc:HGNC:6169]
ITIH1	ENSG00000055957	-2.50647	0.106736	0.698021	-0.0268687	0.953838	0.240341	0.543673	-0.0819412	0.758092	-0.215546	0.58584	0.0516636	0.901264	-0.188677	0.521178	0.0247948	0.960312	inter-alpha-trypsin inhibitor heavy chain 1 [Source:HGNC Symbol;Acc:HGNC:6166]
HPF1	ENSG00000056050	4.39905	0.072713	0.40547	-0.00391858	0.981365	0.149345	0.226363	-0.303526	0.00013639	-0.380157	0.000971283	-0.226894	0.054966	-0.376239	5.50002e-05	-0.230813	0.0876409	histone PARylation factor 1 [Source:HGNC Symbol;Acc:HGNC:26051]
ZFR	ENSG00000056097	6.97224	-0.217587	0.00277982	-0.208123	0.0560782	-0.227051	0.0352831	-0.370211	2.00676e-07	-0.360747	0.000448873	-0.379675	0.000243093	-0.152624	0.0706461	-0.587798	5.93454e-07	zinc finger RNA binding protein [Source:HGNC Symbol;Acc:HGNC:17277]
ZNF280C	ENSG00000056277	2.82614	-0.389931	1.616e-05	-0.324234	0.015118	-0.455627	0.000621474	-0.875001	7.7176e-21	-0.809305	1.6366e-10	-0.940698	1.82527e-12	-0.485071	3.24429e-06	-1.26493	1.59328e-16	zinc finger protein 280C [Source:HGNC Symbol;Acc:HGNC:25955]
NPFFR2	ENSG00000056291	-0.650076	-2.76996	3.39193e-15	-2.66526	5.39744e-09	-2.87465	4.29597e-08	1.37064	1.49697e-05	1.47534	0.00198322	1.26595	0.00474648	4.1406	1.80446e-21	-1.39931	0.00713961	neuropeptide FF receptor 2 [Source:HGNC Symbol;Acc:HGNC:4525]
PHF21B	ENSG00000056487	0.368012	0.37708	0.308511	-1.04771	0.0405064	1.80187	0.000182806	2.16629	1.72741e-09	0.741504	0.171747	3.59108	2.45793e-13	1.78921	1.2641e-05	2.54337	1.67079e-05	PHD finger protein 21B [Source:HGNC Symbol;Acc:HGNC:25161]
TRAF1	ENSG00000056558	4.23212	0.0807859	0.580241	0.263765	0.206283	-0.102193	0.640596	-0.433189	0.000859017	-0.250209	0.212675	-0.616168	0.0012639	-0.513975	0.000726852	-0.352403	0.110875	TNF receptor associated factor 1 [Source:HGNC Symbol;Acc:HGNC:12031]
RC3H2	ENSG00000056586	6.11869	-0.202965	0.0184843	-0.291592	0.0208796	-0.114338	0.394619	-0.255048	0.00233254	-0.343675	0.00480146	-0.166421	0.189189	-0.0520829	0.61642	-0.458013	0.000913836	ring finger and CCCH-type domains 2 [Source:HGNC Symbol;Acc:HGNC:21461]
IL17RB	ENSG00000056736	4.6284	0.623336	0.000130485	0.851984	0.000566563	0.394688	0.100352	0.70929	9.38163e-06	0.937938	0.000101669	0.480641	0.0369387	0.0859539	0.666967	1.33263	6.46922e-07	interleukin 17 receptor B [Source:HGNC Symbol;Acc:HGNC:18015]
TRAF3IP2	ENSG00000056972	5.50402	-0.185871	0.0675722	-0.400419	0.00584265	0.0286782	0.86721	-0.599378	1.05466e-09	-0.813927	4.31078e-09	-0.38483	0.00717291	-0.413508	0.000290654	-0.785249	1.14751e-06	TRAF3 interacting protein 2 [Source:HGNC Symbol;Acc:HGNC:1343]
GYG2	ENSG00000056998	4.00542	-0.573134	0.000820174	-0.473041	0.0637826	-0.673227	0.00846961	-0.419779	0.0131042	-0.319687	0.21678	-0.519872	0.0380289	0.153354	0.456135	-0.992913	0.000364542	glycogenin 2 [Source:HGNC Symbol;Acc:HGNC:4700]
DCBLD2	ENSG00000057019	5.53388	-0.347948	0.00229144	-0.283034	0.100926	-0.412862	0.014619	-0.814476	8.82184e-13	-0.749562	2.25433e-06	-0.87939	1.06357e-07	-0.466528	0.000360411	-1.16242	6.29328e-10	discoidin, CUB and LCCL domain containing 2 [Source:HGNC Symbol;Acc:HGNC:24627]
SERPINB3	ENSG00000057149	0.773878	0.404995	0.449555	-0.052467	0.955449	0.862458	0.250053	-3.35901	7.4541e-10	-3.81647	6.08538e-08	-2.90154	0.000287256	-3.764	3.4865e-09	-2.95401	0.000554828	serpin family B member 3 [Source:HGNC Symbol;Acc:HGNC:10569]
SOAT1	ENSG00000057252	5.94897	-0.272796	0.0349135	0.276167	0.165435	-0.82176	1.52884e-05	-0.788289	4.28871e-10	-0.239326	0.215414	-1.33725	2.60655e-12	-0.515493	0.000422126	-1.06109	3.3472e-07	sterol O-acyltransferase 1 [Source:HGNC Symbol;Acc:HGNC:11177]
PKP2	ENSG00000057294	4.79782	-0.439506	0.00289795	-0.568912	0.00796361	-0.3101	0.167816	-0.476992	0.000963988	-0.606398	0.00361797	-0.347586	0.109751	-0.0374863	0.839398	-0.916498	0.000127187	plakophilin 2 [Source:HGNC Symbol;Acc:HGNC:9024]
MSH4	ENSG00000057468	-1.60874	-0.718679	0.00274304	-0.577162	0.107508	-0.860196	0.0171271	0.151586	0.55054	0.293103	0.44155	0.0100689	0.980891	0.870265	0.00150286	-0.567094	0.159001	mutS homolog 4 [Source:HGNC Symbol;Acc:HGNC:7327]
F7	ENSG00000057593	2.84278	-1.19169	1.79379e-05	-2.23583	1.32603e-08	-0.147549	0.749673	3.60231	1.27173e-27	2.55817	7.57452e-09	4.64646	1.18329e-27	4.794	8.32531e-32	2.41063	2.48757e-07	coagulation factor VII [Source:HGNC Symbol;Acc:HGNC:3544]
GDI2	ENSG00000057608	8.72796	-0.0220272	0.795088	0.135005	0.248868	-0.17906	0.108167	-0.792919	1.22481e-24	-0.635886	8.75409e-10	-0.949951	1.19398e-17	-0.770891	4.50355e-18	-0.814946	2.31611e-11	GDP dissociation inhibitor 2 [Source:HGNC Symbol;Acc:HGNC:4227]
PRDM1	ENSG00000057657	4.50496	-0.519016	7.64571e-06	-0.43366	0.0107562	-0.604372	0.000418879	-0.401303	0.000417223	-0.315947	0.0631928	-0.486658	0.0036037	0.117713	0.39686	-0.920319	1.07929e-06	PR/SET domain 1 [Source:HGNC Symbol;Acc:HGNC:9346]
ATG5	ENSG00000057663	5.53369	-0.300978	0.00027516	-0.425602	0.000392049	-0.176354	0.161574	-0.588102	1.09426e-12	-0.712726	8.00068e-10	-0.463478	9.0092e-05	-0.287124	0.00256644	-0.88908	7.46845e-11	autophagy related 5 [Source:HGNC Symbol;Acc:HGNC:589]
TMCC3	ENSG00000057704	3.83596	-0.381801	0.00627879	-0.479323	0.0189939	-0.284279	0.181217	-0.354784	0.0097132	-0.452306	0.023891	-0.257262	0.216168	0.0270165	0.877869	-0.736585	0.00110076	transmembrane and coiled-coil domain family 3 [Source:HGNC Symbol;Acc:HGNC:29199]
PITHD1	ENSG00000057757	5.76157	0.329004	7.55462e-07	0.324944	0.00101498	0.333064	0.00045555	-0.33398	2.99258e-07	-0.33804	0.000329858	-0.32992	0.00049289	-0.662985	7.11887e-17	-0.00497582	0.969629	PITH domain containing 1 [Source:HGNC Symbol;Acc:HGNC:25022]
MTA3	ENSG00000057935	6.05953	-0.0446163	0.555399	-0.169936	0.104289	0.0807035	0.456884	0.236414	0.000447024	0.111094	0.299014	0.361734	0.000150761	0.28103	0.000364573	0.191798	0.0937326	metastasis associated 1 family member 3 [Source:HGNC Symbol;Acc:HGNC:23784]
USP13	ENSG00000058056	5.33245	0.135769	0.219603	0.436093	0.00608453	-0.164554	0.317353	-0.628292	1.77019e-09	-0.327969	0.0325892	-0.928616	1.80105e-09	-0.764062	5.57831e-10	-0.492523	0.00417028	ubiquitin specific peptidase 13 [Source:HGNC Symbol;Acc:HGNC:12611]
ATP11B	ENSG00000058063	5.98811	-0.482409	0.000115396	-0.534145	0.00330662	-0.430673	0.0209964	-0.783438	2.9192e-10	-0.835174	1.58257e-06	-0.731702	5.17518e-05	-0.301029	0.0378523	-1.26585	9.79882e-10	ATPase phospholipid transporting 11B (putative) [Source:HGNC Symbol;Acc:HGNC:13553]
LAMC2	ENSG00000058085	6.68387	-0.259977	0.275086	0.489267	0.169849	-1.00922	0.00310518	-1.58151	6.25963e-12	-0.832261	0.00930931	-2.33075	6.08677e-11	-1.32153	5.41955e-07	-1.84148	9.46598e-07	laminin subunit gamma 2 [Source:HGNC Symbol;Acc:HGNC:6493]
CDK14	ENSG00000058091	5.15915	-0.641737	1.11657e-07	-0.861827	5.51357e-07	-0.421647	0.0185052	0.316891	0.00762128	0.0968007	0.627504	0.53698	0.00131647	0.958628	1.32394e-11	-0.324846	0.10564	cyclin dependent kinase 14 [Source:HGNC Symbol;Acc:HGNC:8883]
SEC61A1	ENSG00000058262	8.92952	0.0966234	0.193982	0.0702332	0.556105	0.123014	0.258469	-0.489743	4.73618e-12	-0.516134	2.3256e-07	-0.463353	5.142e-06	-0.586367	2.36632e-12	-0.39312	0.000658257	SEC61 translocon subunit alpha 1 [Source:HGNC Symbol;Acc:HGNC:18276]
PPP1R12A	ENSG00000058272	6.18272	-0.362735	2.52585e-06	-0.343212	0.00227089	-0.382259	0.000724208	0.0409354	0.621173	0.0604587	0.636942	0.021412	0.867325	0.403671	5.43439e-06	-0.3218	0.010558	protein phosphatase 1 regulatory subunit 12A [Source:HGNC Symbol;Acc:HGNC:7618]
RASGRF1	ENSG00000058335	2.71789	0.493376	0.0364688	-0.30258	0.416057	1.28933	7.27062e-05	-1.82589	2.79549e-14	-2.62184	1.20288e-15	-1.02993	0.00254601	-2.31926	7.54103e-16	-1.33251	0.000451326	Ras protein specific guanine nucleotide releasing factor 1 [Source:HGNC Symbol;Acc:HGNC:9875]
CAMK2B	ENSG00000058404	2.4358	0.517734	0.0316223	-0.40679	0.270513	1.44226	1.36735e-05	1.35114	1.31363e-08	0.426613	0.248664	2.27566	3.13839e-12	0.833402	0.00231729	1.86887	2.21721e-06	calcium/calmodulin dependent protein kinase II beta [Source:HGNC Symbol;Acc:HGNC:1461]
CROCC	ENSG00000058453	4.64477	0.799055	5.05631e-11	0.885178	1.0045e-06	0.712932	2.40083e-05	0.442129	0.000157296	0.528252	0.00259668	0.356006	0.0355457	-0.356925	0.00932996	1.24118	3.57788e-10	ciliary rootlet coiled-coil, rootletin [Source:HGNC Symbol;Acc:HGNC:21299]
POLR3E	ENSG00000058600	5.69553	0.176841	0.00345903	0.0693445	0.484857	0.284338	0.00100013	0.348746	4.32256e-09	0.24125	0.00615947	0.456243	4.66971e-08	0.171905	0.0133757	0.525588	8.46319e-08	RNA polymerase III subunit E [Source:HGNC Symbol;Acc:HGNC:30347]
ATP2B4	ENSG00000058668	7.39519	-0.358855	0.00108146	-0.337521	0.0388098	-0.380189	0.0198035	-0.136339	0.223465	-0.115005	0.514794	-0.157673	0.344443	0.222516	0.0818296	-0.495194	0.00559518	ATPase plasma membrane Ca2+ transporting 4 [Source:HGNC Symbol;Acc:HGNC:817]
ZC3H11A	ENSG00000058673	7.55648	-0.338804	8.68679e-07	-0.267526	0.00829127	-0.410083	4.81561e-05	0.210509	0.00187378	0.281787	0.0051255	0.139231	0.168503	0.549313	9.78561e-12	-0.128295	0.275764	zinc finger CCCH-type containing 11A [Source:HGNC Symbol;Acc:HGNC:29093]
RIOK2	ENSG00000058729	4.75634	-0.194986	0.00172392	-0.299076	0.000955087	-0.0908963	0.349616	0.245726	5.46869e-05	0.141636	0.132947	0.349815	5.11781e-05	0.440712	1.06317e-09	0.0507398	0.653103	RIO kinase 2 [Source:HGNC Symbol;Acc:HGNC:18999]
YIPF1	ENSG00000058799	5.74998	-0.131846	0.134261	-0.37576	0.00243796	0.112069	0.399975	0.250699	0.00275544	0.00678465	0.964839	0.494614	2.64236e-05	0.382545	9.14771e-05	0.118854	0.424691	Yip1 domain family member 1 [Source:HGNC Symbol;Acc:HGNC:25231]
NDC1	ENSG00000058804	5.92281	0.0600755	0.541301	0.0977488	0.509356	0.0224022	0.88479	-0.658469	1.79804e-13	-0.620796	6.5716e-07	-0.696142	6.57071e-08	-0.718544	7.25911e-12	-0.598393	3.53797e-05	NDC1 transmembrane nucleoporin [Source:HGNC Symbol;Acc:HGNC:25525]
DGKG	ENSG00000058866	0.768308	-0.23769	0.1192	0.100873	0.691471	-0.576254	0.00905595	-1.32849	3.2952e-18	-0.989932	1.30807e-06	-1.66706	1.93317e-13	-1.0908	3.06857e-10	-1.56619	2.26088e-10	diacylglycerol kinase gamma [Source:HGNC Symbol;Acc:HGNC:2853]
FLYWCH1	ENSG00000059122	4.97679	0.386335	2.65996e-06	0.275054	0.0272842	0.497616	2.15334e-05	0.437764	6.37013e-08	0.326482	0.00683147	0.549045	1.33743e-06	0.0514285	0.608456	0.824099	1.10634e-09	FLYWCH-type zinc finger 1 [Source:HGNC Symbol;Acc:HGNC:25404]
UNKL	ENSG00000059145	3.91971	0.265688	0.00237487	0.203827	0.131745	0.327549	0.0092517	0.573018	3.78502e-11	0.511156	5.57861e-05	0.634879	1.28713e-07	0.307329	0.00217352	0.838706	4.60522e-09	unk like zinc finger [Source:HGNC Symbol;Acc:HGNC:14184]
TBXAS1	ENSG00000059377	3.94767	-0.244638	0.0481581	-0.0919328	0.657028	-0.397344	0.0283647	0.0986208	0.437168	0.251326	0.17752	-0.0540848	0.784398	0.343259	0.0143143	-0.146018	0.496688	thromboxane A synthase 1 [Source:HGNC Symbol;Acc:HGNC:11609]
PARP12	ENSG00000059378	5.90329	0.323682	0.00210532	0.368152	0.0207071	0.279213	0.071411	-0.263839	0.0110005	-0.21937	0.165806	-0.308309	0.0437314	-0.587522	1.23075e-06	0.059843	0.75851	poly(ADP-ribose) polymerase family member 12 [Source:HGNC Symbol;Acc:HGNC:21919]
ALDH18A1	ENSG00000059573	7.28661	-0.241864	0.00126975	-0.342762	0.00171817	-0.140966	0.220684	-0.446414	1.64077e-09	-0.547312	1.89333e-07	-0.345516	0.00127265	-0.20455	0.0181768	-0.688278	1.90643e-08	aldehyde dehydrogenase 18 family member A1 [Source:HGNC Symbol;Acc:HGNC:9722]
TARBP1	ENSG00000059588	6.2145	0.124371	0.249699	0.489001	0.00150127	-0.240258	0.122635	-0.255671	0.0118309	0.108958	0.513028	-0.620301	2.639e-05	-0.380042	0.00128736	-0.1313	0.46772	TAR (HIV-1) RNA binding protein 1 [Source:HGNC Symbol;Acc:HGNC:11568]
GATB	ENSG00000059691	4.35047	0.262469	0.000835979	0.0422167	0.759049	0.482721	1.61819e-05	0.135277	0.0864555	-0.0849755	0.500527	0.355529	0.00118591	-0.127192	0.168275	0.397746	0.00182621	glutamyl-tRNA amidotransferase subunit B [Source:HGNC Symbol;Acc:HGNC:8849]
MXD1	ENSG00000059728	4.87137	-0.198133	0.0768874	-0.153518	0.381596	-0.242748	0.143656	-0.123175	0.271407	-0.0785602	0.665519	-0.167791	0.310389	0.0749577	0.572598	-0.321309	0.0765987	MAX dimerization protein 1 [Source:HGNC Symbol;Acc:HGNC:6761]
CDK17	ENSG00000059758	5.40563	-0.492417	2.44968e-10	-0.578168	1.77376e-07	-0.406667	0.000302628	0.892315	1.00488e-27	0.806565	1.6719e-12	0.978066	2.98702e-19	1.38473	8.53942e-41	0.399898	0.00134167	cyclin dependent kinase 17 [Source:HGNC Symbol;Acc:HGNC:8750]
DNAJC25	ENSG00000059769	3.52968	-0.0358548	0.625914	-0.0528395	0.638449	-0.01887	0.869221	0.182042	0.00528168	0.165058	0.097984	0.199027	0.0353163	0.217897	0.00422598	0.146188	0.191427	DnaJ heat shock protein family (Hsp40) member C25 [Source:HGNC Symbol;Acc:HGNC:34187]
SLC2A3	ENSG00000059804	5.15921	-0.167744	0.231138	-0.154643	0.478481	-0.180844	0.391662	-0.378848	0.00401511	-0.365748	0.0616768	-0.391949	0.0447211	-0.211104	0.179325	-0.546592	0.0123962	solute carrier family 2 member 3 [Source:HGNC Symbol;Acc:HGNC:11007]
PSD	ENSG00000059915	1.96097	0.684247	1.37836e-05	0.80091	0.000768124	0.567584	0.011744	0.677275	1.14661e-05	0.793938	0.000636653	0.560612	0.0106985	-0.00697146	0.971918	1.36152	1.47999e-07	pleckstrin and Sec7 domain containing [Source:HGNC Symbol;Acc:HGNC:9507]
CTDP1	ENSG00000060069	4.83983	0.489283	1.0104e-10	0.499822	7.11332e-06	0.478744	6.79225e-06	-0.114466	0.128527	-0.103927	0.374325	-0.125005	0.264712	-0.603749	5.11613e-12	0.374817	0.00198064	CTD phosphatase subunit 1 [Source:HGNC Symbol;Acc:HGNC:2498]
YBX3	ENSG00000060138	7.39225	0.314562	0.00760169	0.515338	0.003434	0.113786	0.545016	-1.30211	1.25326e-25	-1.10133	1.53282e-11	-1.50288	6.94488e-17	-1.61667	1.96527e-27	-0.987546	2.35502e-07	Y-box binding protein 3 [Source:HGNC Symbol;Acc:HGNC:2428]
STYK1	ENSG00000060140	2.71565	-0.0194751	0.923047	-0.151069	0.593983	0.112119	0.69016	-0.994459	3.41435e-09	-1.12605	1.49508e-06	-0.862865	0.000463586	-0.974984	6.85788e-07	-1.01393	0.000236675	serine/threonine/tyrosine kinase 1 [Source:HGNC Symbol;Acc:HGNC:18889]
WNK1	ENSG00000060237	8.27514	-0.331811	0.000749655	-0.414431	0.00390053	-0.249191	0.0931267	-0.290683	0.00268602	-0.373303	0.0081512	-0.208062	0.153932	0.0411284	0.736185	-0.622494	9.53536e-05	WNK lysine deficient protein kinase 1 [Source:HGNC Symbol;Acc:HGNC:14540]
CCAR1	ENSG00000060339	6.53614	-0.136037	0.0174023	-0.219929	0.0083815	-0.0521443	0.570576	-0.116639	0.0385402	-0.200531	0.0143428	-0.0327463	0.718755	0.019398	0.783308	-0.252675	0.00608281	cell division cycle and apoptosis regulator 1 [Source:HGNC Symbol;Acc:HGNC:24236]
OGFR	ENSG00000060491	5.79576	0.610105	4.92313e-09	0.538756	0.000497814	0.681453	3.30622e-06	0.0543689	0.623995	-0.0169796	0.926575	0.125717	0.422233	-0.555736	2.96895e-06	0.664474	7.28714e-05	opioid growth factor receptor [Source:HGNC Symbol;Acc:HGNC:15768]
GNA15	ENSG00000060558	4.0261	0.591807	0.000118865	0.748612	0.00128908	0.435002	0.0527608	-0.576442	0.000131505	-0.419637	0.0615983	-0.733247	0.000989372	-1.16825	1.03021e-10	0.0153645	0.959627	G protein subunit alpha 15 [Source:HGNC Symbol;Acc:HGNC:4383]
PIGV	ENSG00000060642	4.38225	-0.084612	0.305062	-0.186101	0.117043	0.0168773	0.900553	0.531753	6.62061e-12	0.430263	0.000139525	0.633242	3.96546e-09	0.616365	1.37454e-11	0.447141	0.000391248	phosphatidylinositol glycan anchor biosynthesis class V [Source:HGNC Symbol;Acc:HGNC:26031]
PTPRU	ENSG00000060656	5.76025	0.74094	4.65147e-06	0.399714	0.11052	1.08217	1.88736e-06	-0.666186	2.54042e-05	-1.00741	6.41385e-06	-0.32496	0.176655	-1.40713	2.65963e-13	0.074754	0.804931	protein tyrosine phosphatase receptor type U [Source:HGNC Symbol;Acc:HGNC:9683]
SNRNP40	ENSG00000060688	5.60554	0.102519	0.141911	0.0473153	0.682642	0.157722	0.116929	-0.281159	2.0189e-05	-0.336362	0.000429303	-0.225956	0.0199953	-0.383678	7.75203e-07	-0.17864	0.112467	small nuclear ribonucleoprotein U5 subunit 40 [Source:HGNC Symbol;Acc:HGNC:30857]
RIMBP2	ENSG00000060709	0.517228	0.0542003	0.903281	0.00467421	0.994836	0.103726	0.872003	-0.120777	0.769177	-0.170303	0.790366	-0.0712508	0.909416	-0.174977	0.704642	-0.0665766	0.927066	RIMS binding protein 2 [Source:HGNC Symbol;Acc:HGNC:30339]
COL11A1	ENSG00000060718	7.60854	-1.04632	2.42203e-05	-1.44684	3.39675e-05	-0.6458	0.0853661	-0.249933	0.323691	-0.65045	0.068883	0.150585	0.699709	0.796385	0.00505251	-1.29625	0.00131086	collagen type XI alpha 1 chain [Source:HGNC Symbol;Acc:HGNC:2186]
QSER1	ENSG00000060749	6.30333	-0.50138	1.99795e-06	-0.529731	0.000506095	-0.473029	0.00235837	-0.605907	5.75586e-09	-0.634258	1.66281e-05	-0.577556	0.000135686	-0.104527	0.408541	-1.10729	2.05421e-10	glutamine and serine rich 1 [Source:HGNC Symbol;Acc:HGNC:26154]
MPC1	ENSG00000060762	4.89894	-0.00569427	0.959001	0.147445	0.32302	-0.158833	0.269518	-0.50992	2.5875e-08	-0.356781	0.00745873	-0.663058	7.30671e-07	-0.504225	2.53617e-06	-0.515614	0.000630979	mitochondrial pyruvate carrier 1 [Source:HGNC Symbol;Acc:HGNC:21606]
ACAA1	ENSG00000060971	5.63739	0.0601399	0.55599	-0.0429178	0.7926	0.163198	0.247936	0.127241	0.17672	0.0241833	0.881692	0.230299	0.085038	0.0671011	0.551248	0.187381	0.234712	acetyl-CoA acyltransferase 1 [Source:HGNC Symbol;Acc:HGNC:82]
BCAT1	ENSG00000060982	5.13567	-0.211789	0.244674	0.203568	0.477092	-0.627146	0.0158406	-1.44891	4.55708e-16	-1.03356	1.70168e-05	-1.86427	3.27142e-12	-1.23712	1.24283e-09	-1.6607	8.9727e-09	branched chain amino acid transaminase 1 [Source:HGNC Symbol;Acc:HGNC:976]
HDAC7	ENSG00000061273	6.38759	0.185327	0.00683235	0.132664	0.215494	0.237989	0.0161581	0.475996	2.27684e-12	0.423333	1.74568e-05	0.528658	2.03233e-08	0.290669	0.000201127	0.661322	3.02589e-09	histone deacetylase 7 [Source:HGNC Symbol;Acc:HGNC:14067]
LZTS1	ENSG00000061337	4.11882	-0.109061	0.420581	-0.0277637	0.905103	-0.190357	0.332351	-0.258243	0.0389616	-0.176946	0.366684	-0.339539	0.064812	-0.149182	0.317746	-0.367303	0.0783584	leucine zipper tumor suppressor 1 [Source:HGNC Symbol;Acc:HGNC:13861]
PRDM6	ENSG00000061455	2.14706	-0.388433	0.0450972	-0.567241	0.0440826	-0.209625	0.493032	0.540016	0.00404739	0.361207	0.221142	0.718824	0.00665219	0.928449	2.47853e-05	0.151582	0.661197	PR/SET domain 6 [Source:HGNC Symbol;Acc:HGNC:9350]
SPAG4	ENSG00000061656	2.50584	0.623902	2.55997e-05	-0.0768766	0.765729	1.32468	3.38772e-10	-0.261655	0.0776948	-0.962433	2.73824e-06	0.439124	0.0363393	-0.885557	2.47021e-07	0.362248	0.144868	sperm associated antigen 4 [Source:HGNC Symbol;Acc:HGNC:11214]
NCKAP1	ENSG00000061676	7.83342	-0.275021	0.000417248	-0.249822	0.0315645	-0.300219	0.00906231	-0.374926	9.54551e-07	-0.349728	0.00163815	-0.400124	0.000328626	-0.0999053	0.280498	-0.649947	2.97697e-07	NCK associated protein 1 [Source:HGNC Symbol;Acc:HGNC:7666]
MRPS35	ENSG00000061794	6.35172	0.00493844	0.960331	-0.159876	0.221168	0.169753	0.179125	-0.117459	0.16734	-0.282274	0.0200344	0.0473556	0.724263	-0.122398	0.216046	-0.112521	0.44414	mitochondrial ribosomal protein S35 [Source:HGNC Symbol;Acc:HGNC:16635]
GUCY1B1	ENSG00000061918	4.24378	-0.379004	0.00108815	-0.174344	0.34542	-0.583664	0.000660804	-0.476427	2.76492e-05	-0.271768	0.115458	-0.681087	4.57336e-05	-0.0974233	0.486623	-0.855431	5.5924e-06	guanylate cyclase 1 soluble subunit beta 1 [Source:HGNC Symbol;Acc:HGNC:4687]
SFSWAP	ENSG00000061936	5.56121	0.199557	0.000771865	0.13433	0.144608	0.264784	0.0019124	0.2187	0.000169947	0.153473	0.0848154	0.283927	0.000614561	0.0191428	0.79614	0.418257	1.33333e-05	splicing factor SWAP [Source:HGNC Symbol;Acc:HGNC:10790]
TNK2	ENSG00000061938	6.21796	0.6706	2.26107e-13	0.63069	2.29915e-06	0.710511	2.2243e-08	0.524249	2.41628e-09	0.484338	0.000184172	0.56416	4.27192e-06	-0.146351	0.160935	1.19485	1.77719e-15	tyrosine kinase non receptor 2 [Source:HGNC Symbol;Acc:HGNC:19297]
MON2	ENSG00000061987	5.86879	-0.632019	4.83134e-15	-0.716749	2.04725e-10	-0.547289	2.0383e-06	0.466775	1.35995e-09	0.382046	0.000763552	0.551505	3.03246e-07	1.09879	9.50633e-29	-0.165244	0.210883	MON2 homolog, regulator of endosome-to-Golgi trafficking [Source:HGNC Symbol;Acc:HGNC:29177]
CDH3	ENSG00000062038	7.03593	0.454684	0.0196808	0.462192	0.124135	0.447176	0.116113	-2.44882	2.50422e-29	-2.44131	6.53495e-19	-2.45632	2.33888e-15	-2.9035	2.92234e-29	-1.99413	8.21115e-10	cadherin 3 [Source:HGNC Symbol;Acc:HGNC:1762]
ARSF	ENSG00000062096	-1.57291	0.456561	0.194039	-0.592228	0.256728	1.50535	0.00236348	-2.45463	8.74921e-12	-3.50342	8.03619e-13	-1.40584	0.00620986	-2.91119	1.30151e-11	-1.99807	0.000436262	arylsulfatase F [Source:HGNC Symbol;Acc:HGNC:721]
GPBP1	ENSG00000062194	6.90015	-0.121212	0.0522022	-0.179375	0.0507884	-0.0630486	0.522414	0.324302	6.92398e-08	0.266139	0.00283214	0.382465	6.53109e-06	0.445514	3.96915e-10	0.20309	0.0443121	GC-rich promoter binding protein 1 [Source:HGNC Symbol;Acc:HGNC:29520]
DGAT2	ENSG00000062282	5.82325	0.3255	0.123132	1.34806	2.12494e-05	-0.697058	0.0236562	-1.38395	2.05967e-11	-0.361393	0.244267	-2.40651	1.63107e-13	-1.70945	3.03476e-12	-1.05845	0.0015253	diacylglycerol O-acyltransferase 2 [Source:HGNC Symbol;Acc:HGNC:16940]
ZNF112	ENSG00000062370	2.80561	-0.439157	4.30566e-05	-0.293798	0.0689327	-0.584516	0.000226744	0.168389	0.120338	0.313747	0.0507181	0.02303	0.898399	0.607546	9.78106e-07	-0.270768	0.132657	zinc finger protein 112 [Source:HGNC Symbol;Acc:HGNC:12892]
CS	ENSG00000062485	7.52881	-0.0973338	0.210025	-0.323483	0.0028516	0.128815	0.255946	-0.161083	0.029009	-0.387232	0.000224086	0.0650658	0.575091	-0.0637491	0.476656	-0.258417	0.0344248	citrate synthase [Source:HGNC Symbol;Acc:HGNC:2422]
LTK	ENSG00000062524	0.140297	0.607345	0.02275	-0.0974921	0.835471	1.31218	0.000362195	0.214296	0.434568	-0.490541	0.21514	0.919134	0.011748	-0.393049	0.204553	0.821642	0.0598585	leukocyte receptor tyrosine kinase [Source:HGNC Symbol;Acc:HGNC:6721]
MRPS24	ENSG00000062582	2.84388	0.823479	5.42554e-07	0.763171	0.00205359	0.883786	0.000121669	-0.32594	0.0451647	-0.386248	0.110109	-0.265633	0.281521	-1.14942	1.81471e-09	0.497539	0.0662284	mitochondrial ribosomal protein S24 [Source:HGNC Symbol;Acc:HGNC:14510]
ELMO2	ENSG00000062598	5.95735	-0.0033426	0.970287	-0.195492	0.087626	0.188806	0.092424	0.161293	0.0318403	-0.0308563	0.813098	0.353442	0.000793226	0.164635	0.0608065	0.15795	0.217915	engulfment and cell motility 2 [Source:HGNC Symbol;Acc:HGNC:17233]
WAPL	ENSG00000062650	6.44095	-0.317154	1.93587e-06	-0.353879	0.000256392	-0.280428	0.00416	0.277499	2.14956e-05	0.240773	0.0139963	0.314224	0.000734021	0.594652	4.5926e-14	-0.0396552	0.748067	WAPL cohesin release factor [Source:HGNC Symbol;Acc:HGNC:23293]
VMP1	ENSG00000062716	8.00728	-0.260049	0.0278815	-0.418683	0.0145471	-0.101416	0.594238	0.674873	4.85298e-09	0.51624	0.00259349	0.833507	1.89381e-07	0.934923	9.73895e-12	0.414824	0.0305564	vacuole membrane protein 1 [Source:HGNC Symbol;Acc:HGNC:29559]
APPBP2	ENSG00000062725	6.09709	-0.355036	0.000238959	-0.611605	1.10748e-05	-0.098466	0.528333	0.752826	1.15739e-14	0.496256	0.000443983	1.0094	6.44314e-14	1.10786	8.75712e-21	0.39779	0.0118864	amyloid beta precursor protein binding protein 2 [Source:HGNC Symbol;Acc:HGNC:622]
POLD1	ENSG00000062822	4.94449	0.655497	1.74868e-11	0.623351	1.3707e-05	0.687642	4.25012e-07	-0.713079	9.85183e-14	-0.745224	2.3104e-08	-0.680933	7.43154e-07	-1.36858	2.94875e-29	-0.0575821	0.7448	DNA polymerase delta 1, catalytic subunit [Source:HGNC Symbol;Acc:HGNC:9175]
SEZ6	ENSG00000063015	1.05236	2.80401	1.45958e-08	3.38623	1.66225e-05	2.22179	0.000434423	0.736575	0.107731	1.31879	0.064971	0.154356	0.832725	-2.06744	0.000114205	3.54058	1.13286e-05	seizure related 6 homolog [Source:HGNC Symbol;Acc:HGNC:15955]
EIF4B	ENSG00000063046	8.55166	-0.286341	0.000130238	-0.34753	0.00145216	-0.225151	0.044026	0.452727	9.95706e-10	0.391537	0.000327322	0.513917	7.05995e-07	0.739068	1.69828e-16	0.166386	0.189087	eukaryotic translation initiation factor 4B [Source:HGNC Symbol;Acc:HGNC:3285]
SLC6A16	ENSG00000063127	1.41585	-0.331551	0.0941355	-0.664061	0.0183168	0.00095945	0.997778	-1.11575	5.99767e-09	-1.44826	4.99916e-08	-0.783239	0.00539329	-0.784198	0.00041075	-1.4473	4.74518e-06	solute carrier family 6 member 16 [Source:HGNC Symbol;Acc:HGNC:13622]
BICRA	ENSG00000063169	4.28298	0.341267	1.05058e-05	0.260724	0.026162	0.421809	0.000133485	0.218875	0.00414495	0.138333	0.248664	0.299417	0.0060101	-0.122392	0.1794	0.560142	8.17099e-06	BRD4 interacting chromatin remodeling complex associated protein [Source:HGNC Symbol;Acc:HGNC:4332]
SPHK2	ENSG00000063176	3.77604	0.490786	2.04052e-08	0.532662	4.21295e-05	0.44891	0.000284884	0.401406	2.49613e-06	0.443282	0.000466646	0.35953	0.00312911	-0.0893801	0.390639	0.892192	4.70615e-10	sphingosine kinase 2 [Source:HGNC Symbol;Acc:HGNC:18859]
RPL18	ENSG00000063177	9.56367	0.70817	5.09967e-09	0.717122	7.15946e-05	0.699218	3.72967e-05	0.115165	0.352684	0.124117	0.523587	0.106213	0.569328	-0.593004	1.69882e-05	0.823335	2.35669e-05	ribosomal protein L18 [Source:HGNC Symbol;Acc:HGNC:10310]
CA11	ENSG00000063180	3.12753	1.13022	1.7518e-10	1.44081	9.11931e-08	0.819639	0.000778253	0.349379	0.0424595	0.659963	0.0103197	0.038794	0.893581	-0.780845	8.60217e-05	1.4796	2.22256e-07	carbonic anhydrase 11 [Source:HGNC Symbol;Acc:HGNC:1370]
ISOC2	ENSG00000063241	5.7618	0.678005	1.65161e-08	0.443202	0.0138697	0.912808	6.58704e-08	-0.0535606	0.677953	-0.288364	0.102431	0.181243	0.308438	-0.731565	1.09847e-07	0.624444	0.00124666	isochorismatase domain containing 2 [Source:HGNC Symbol;Acc:HGNC:26278]
U2AF2	ENSG00000063244	7.42591	0.353358	3.01474e-07	0.224568	0.0311198	0.482147	9.46403e-07	0.0140808	0.855674	-0.114709	0.279875	0.14287	0.156899	-0.339277	1.80173e-05	0.367439	0.000999807	U2 small nuclear RNA auxiliary factor 2 [Source:HGNC Symbol;Acc:HGNC:23156]
EPN1	ENSG00000063245	6.99211	0.603387	6.23999e-10	0.458503	0.00147433	0.748271	5.01006e-08	0.0051475	0.963611	-0.139737	0.351741	0.150032	0.297576	-0.59824	7.91176e-08	0.608535	9.8184e-05	epsin 1 [Source:HGNC Symbol;Acc:HGNC:21604]
MED29	ENSG00000063322	6.41269	0.28259	0.000395263	0.19225	0.119361	0.372929	0.00108782	0.394927	4.66877e-07	0.304587	0.00937892	0.485266	1.09864e-05	0.112337	0.233716	0.677517	1.86796e-07	mediator complex subunit 29 [Source:HGNC Symbol;Acc:HGNC:23074]
AHRR	ENSG00000063438	1.53084	0.384132	0.0180981	0.0794287	0.778789	0.688836	0.00256342	-0.18325	0.265058	-0.487953	0.0357985	0.121454	0.630502	-0.567382	0.00214623	0.200883	0.47784	aryl-hydrocarbon receptor repressor [Source:HGNC Symbol;Acc:HGNC:346]
ZNF275	ENSG00000063587	4.89616	-0.312909	0.000240975	-0.301065	0.0169421	-0.324752	0.00993618	-0.196648	0.0200452	-0.184805	0.149911	-0.208491	0.0957795	0.116261	0.249361	-0.509557	0.00022604	zinc finger protein 275 [Source:HGNC Symbol;Acc:HGNC:13069]
MTMR1	ENSG00000063601	5.57362	-0.0533994	0.498664	-0.0335336	0.792231	-0.0732652	0.529624	-0.147676	0.0402128	-0.12781	0.248436	-0.167542	0.114644	-0.0942767	0.270888	-0.201076	0.0948725	myotubularin related protein 1 [Source:HGNC Symbol;Acc:HGNC:7449]
GPC1	ENSG00000063660	6.57938	0.653197	2.57292e-05	0.761436	0.00117747	0.544958	0.0144625	0.0569603	0.736705	0.1652	0.510988	-0.0512791	0.840283	-0.596237	0.000817052	0.710157	0.00501137	glypican 1 [Source:HGNC Symbol;Acc:HGNC:4449]
ADCK1	ENSG00000063761	3.30957	0.0999447	0.275575	-0.0106329	0.948798	0.210522	0.102817	0.0755545	0.403065	-0.0350231	0.815189	0.186132	0.142039	-0.0243902	0.822797	0.175499	0.234645	aarF domain containing kinase 1 [Source:HGNC Symbol;Acc:HGNC:19038]
HAGH	ENSG00000063854	5.31712	0.654591	2.23994e-11	0.418674	0.00364811	0.890508	1.04227e-10	0.763756	3.34267e-15	0.527839	0.000163411	0.999673	7.18037e-14	0.109165	0.340122	1.41835	6.59586e-18	hydroxyacylglutathione hydrolase [Source:HGNC Symbol;Acc:HGNC:4805]
RNF4	ENSG00000063978	6.28833	0.0183963	0.791011	-0.0872519	0.371217	0.124045	0.175744	0.098155	0.108481	-0.0074932	0.94565	0.203803	0.0180632	0.0797587	0.267686	0.116551	0.260828	ring finger protein 4 [Source:HGNC Symbol;Acc:HGNC:10067]
CASP8	ENSG00000064012	4.89664	-0.44242	6.43734e-08	-0.531555	6.0656e-06	-0.353285	0.00320761	-0.0720248	0.39576	-0.16116	0.192694	0.0171102	0.900208	0.370396	7.67044e-05	-0.514445	9.68336e-05	caspase 8 [Source:HGNC Symbol;Acc:HGNC:1509]
LIMCH1	ENSG00000064042	6.3724	-0.771106	5.09898e-07	-0.58936	0.00808931	-0.952852	3.21373e-05	-0.369301	0.0145392	-0.187555	0.43727	-0.551047	0.0130915	0.401806	0.0228375	-1.14041	4.74891e-06	LIM and calponin homology domains 1 [Source:HGNC Symbol;Acc:HGNC:29191]
INTS13	ENSG00000064102	5.29357	0.026324	0.787147	0.0575636	0.695229	-0.00491572	0.974476	-0.888382	1.74748e-23	-0.857142	8.9619e-13	-0.919622	2.80086e-13	-0.914706	7.27864e-19	-0.862058	7.54228e-10	integrator complex subunit 13 [Source:HGNC Symbol;Acc:HGNC:20174]
TM7SF3	ENSG00000064115	6.26893	-0.185985	0.101202	-0.171652	0.326346	-0.200318	0.237941	-0.41909	0.000104431	-0.404757	0.0104259	-0.433422	0.00638171	-0.233105	0.068991	-0.605075	0.000712662	transmembrane 7 superfamily member 3 [Source:HGNC Symbol;Acc:HGNC:23049]
DLX3	ENSG00000064195	2.6396	0.956861	2.76882e-05	0.493112	0.1677	1.42061	7.85745e-06	-0.57536	0.0102611	-1.03911	0.00103304	-0.11161	0.760728	-1.53222	9.84884e-09	0.381502	0.328896	distal-less homeobox 3 [Source:HGNC Symbol;Acc:HGNC:2916]
SPA17	ENSG00000064199	3.4827	-0.264457	0.0353023	-0.361818	0.0497271	-0.167097	0.391662	0.495668	4.38919e-05	0.398308	0.0304711	0.593029	0.000529945	0.760126	1.13648e-07	0.231211	0.274053	sperm autoantigenic protein 17 [Source:HGNC Symbol;Acc:HGNC:11210]
TSPAN32	ENSG00000064201	0.281251	0.28994	0.101473	0.314974	0.249355	0.264905	0.315651	0.0195651	0.920621	0.0445996	0.882301	-0.00546947	0.985236	-0.270375	0.180649	0.309505	0.293947	tetraspanin 32 [Source:HGNC Symbol;Acc:HGNC:13410]
CCN5	ENSG00000064205	4.77223	0.0236639	0.936936	0.387645	0.341748	-0.340317	0.393351	0.345087	0.176465	0.709069	0.0639706	-0.0188939	0.964886	0.321423	0.280596	0.368751	0.399839	cellular communication network factor 5 [Source:HGNC Symbol;Acc:HGNC:12770]
DMRT3	ENSG00000064218	0.744482	0.214297	0.321576	0.58706	0.0607753	-0.158467	0.638325	-1.89191	1.00207e-18	-1.51915	5.66368e-08	-2.26467	1.51172e-12	-2.10621	4.44202e-17	-1.67761	6.08368e-07	doublesex and mab-3 related transcription factor 3 [Source:HGNC Symbol;Acc:HGNC:13909]
ST3GAL6	ENSG00000064225	3.63346	-0.335011	0.00961795	0.175785	0.400891	-0.845808	1.08895e-05	-1.77311	1.20001e-34	-1.26231	1.88648e-12	-2.28391	1.44738e-26	-1.4381	7.03861e-20	-2.10812	1.2726e-20	ST3 beta-galactoside alpha-2,3-sialyltransferase 6 [Source:HGNC Symbol;Acc:HGNC:18080]
ATP2C2	ENSG00000064270	4.3526	0.0723371	0.730772	-0.29738	0.30956	0.442054	0.106753	0.487981	0.00785554	0.118264	0.706616	0.857698	0.000797029	0.415644	0.0539826	0.560318	0.0694581	ATPase secretory pathway Ca2+ transporting 2 [Source:HGNC Symbol;Acc:HGNC:29103]
NGFR	ENSG00000064300	3.90542	0.194076	0.457106	0.477884	0.212108	-0.0897319	0.828219	0.259844	0.293551	0.543653	0.142824	-0.0239637	0.953432	0.0657682	0.827461	0.453921	0.270422	nerve growth factor receptor [Source:HGNC Symbol;Acc:HGNC:7809]
CDON	ENSG00000064309	4.6446	-0.125673	0.428884	-0.248208	0.283354	-0.00313775	0.990542	1.2668	5.91516e-17	1.14427	1.94409e-07	1.38934	6.94713e-12	1.39247	3.98749e-15	1.14113	2.1635e-06	cell adhesion associated, oncogene regulated [Source:HGNC Symbol;Acc:HGNC:17104]
TAF2	ENSG00000064313	5.97403	0.230748	0.0301156	-0.0225169	0.908031	0.484013	0.00119777	-0.402491	8.85705e-05	-0.655757	7.33595e-06	-0.149226	0.348741	-0.63324	1.72098e-07	-0.171743	0.342796	TATA-box binding protein associated factor 2 [Source:HGNC Symbol;Acc:HGNC:11536]
HIPK2	ENSG00000064393	6.74504	-0.307079	0.0174899	-0.453889	0.0156848	-0.16027	0.429305	0.16192	0.214274	0.0151102	0.948101	0.308729	0.0938165	0.468999	0.00142617	-0.14516	0.522263	homeodomain interacting protein kinase 2 [Source:HGNC Symbol;Acc:HGNC:14402]
TNPO3	ENSG00000064419	6.47813	0.017923	0.814265	0.0126839	0.91808	0.0231621	0.837766	-0.480032	2.83083e-13	-0.485271	1.49922e-07	-0.474793	4.45783e-07	-0.497955	9.04826e-11	-0.462109	1.43608e-05	transportin 3 [Source:HGNC Symbol;Acc:HGNC:17103]
BORCS8-MEF2B	ENSG00000064489	-0.545433	0.629299	2.89179e-07	0.661605	0.000316925	0.596993	0.000576904	-0.0161874	0.907573	0.0161189	0.94212	-0.0484937	0.807606	-0.645486	4.41752e-06	0.613111	0.00203572	BORCS8-MEF2B readthrough [Source:HGNC Symbol;Acc:HGNC:39979]
RFXANK	ENSG00000064490	5.65546	0.643039	5.13997e-09	0.663453	5.11707e-05	0.622625	5.48186e-05	-0.0615589	0.597233	-0.0411451	0.826809	-0.0819728	0.634428	-0.704598	2.41076e-08	0.58148	0.00101525	regulatory factor X associated ankyrin containing protein [Source:HGNC Symbol;Acc:HGNC:9987]
TMEM161A	ENSG00000064545	5.13403	0.750045	2.04715e-12	0.708886	6.0229e-06	0.791204	8.99868e-08	-0.368398	0.000303932	-0.409557	0.00588545	-0.327239	0.0301933	-1.11844	8.03662e-19	0.381647	0.0254997	transmembrane protein 161A [Source:HGNC Symbol;Acc:HGNC:26020]
LPAR2	ENSG00000064547	4.74484	0.411781	3.32089e-05	0.28197	0.0635271	0.541591	0.0001236	-0.618936	3.08723e-10	-0.748747	6.39469e-08	-0.489126	0.0005918	-1.03072	7.82096e-18	-0.207155	0.218694	lysophosphatidic acid receptor 2 [Source:HGNC Symbol;Acc:HGNC:3168]
CTSA	ENSG00000064601	7.30222	0.366447	3.04408e-05	0.172907	0.211822	0.559987	7.71498e-06	-0.238007	0.00605568	-0.431548	0.000523315	-0.0444673	0.754512	-0.604454	3.30969e-09	0.128439	0.402622	cathepsin A [Source:HGNC Symbol;Acc:HGNC:9251]
SUGP2	ENSG00000064607	5.99781	-0.00840448	0.927608	-0.040704	0.762782	0.023895	0.856882	0.0625621	0.438441	0.0302626	0.821175	0.0948616	0.418673	0.0709666	0.445145	0.0541576	0.701922	SURP and G-patch domain containing 2 [Source:HGNC Symbol;Acc:HGNC:18641]
SLC12A2	ENSG00000064651	7.21152	-0.988264	1.33629e-07	-1.56619	2.98209e-09	-0.410337	0.14763	0.576018	0.00161187	-0.00190956	0.995419	1.15395	5.04799e-06	1.56428	1.84026e-12	-0.412246	0.187665	solute carrier family 12 member 2 [Source:HGNC Symbol;Acc:HGNC:10911]
SNX24	ENSG00000064652	3.94153	-0.0247081	0.817952	-0.103494	0.497745	0.0540775	0.728137	0.604753	5.74191e-11	0.525968	0.000102061	0.683539	9.28169e-08	0.629462	5.52045e-09	0.580045	0.000118817	sorting nexin 24 [Source:HGNC Symbol;Acc:HGNC:21533]
EYA2	ENSG00000064655	4.59292	0.711452	0.000396136	0.669862	0.0295542	0.753042	0.00834762	-0.302467	0.134502	-0.344058	0.259058	-0.260877	0.394479	-1.01392	1.20401e-05	0.408985	0.229465	EYA transcriptional coactivator and phosphatase 2 [Source:HGNC Symbol;Acc:HGNC:3520]
CNN2	ENSG00000064666	7.24417	-0.00688778	0.958924	-0.0442757	0.825755	0.0305001	0.875036	-0.37611	0.000643511	-0.413497	0.0102121	-0.338722	0.038227	-0.369222	0.0042648	-0.382997	0.0384815	calponin 2 [Source:HGNC Symbol;Acc:HGNC:2156]
ABCA7	ENSG00000064687	4.34687	0.404807	0.000438851	0.466159	0.0072911	0.343456	0.0412876	0.309737	0.00640878	0.371089	0.0303096	0.248386	0.138494	-0.0950701	0.494427	0.714545	0.000133964	ATP binding cassette subfamily A member 7 [Source:HGNC Symbol;Acc:HGNC:37]
SNCAIP	ENSG00000064692	2.46512	-0.7652	0.000370274	-0.887339	0.00403882	-0.64306	0.047858	-1.03703	9.97123e-07	-1.15917	9.33983e-05	-0.914886	0.00362937	-0.271826	0.284342	-1.80223	4.19195e-07	synuclein alpha interacting protein [Source:HGNC Symbol;Acc:HGNC:11139]
DDX20	ENSG00000064703	4.72456	-0.097901	0.115726	-0.101758	0.28561	-0.0940436	0.315535	-0.195625	0.000945486	-0.199482	0.0227642	-0.191768	0.0275384	-0.0977241	0.167749	-0.293526	0.00270567	DEAD-box helicase 20 [Source:HGNC Symbol;Acc:HGNC:2743]
BTBD1	ENSG00000064726	6.28981	-0.150512	0.0424266	-0.213725	0.0503399	-0.0872991	0.450566	0.0148792	0.855869	-0.0483337	0.692508	0.0780921	0.48566	0.165391	0.0504435	-0.135633	0.276257	BTB domain containing 1 [Source:HGNC Symbol;Acc:HGNC:1120]
FAR2	ENSG00000064763	4.42564	-0.0433585	0.835179	-0.791742	0.00222351	0.705025	0.00591021	-0.338351	0.059715	-1.08674	1.24626e-05	0.410033	0.113479	-0.294993	0.161935	-0.38171	0.209549	fatty acyl-CoA reductase 2 [Source:HGNC Symbol;Acc:HGNC:25531]
BCAS1	ENSG00000064787	5.39314	-1.27097	2.0705e-05	-2.94042	6.16099e-12	0.398477	0.380395	2.51218	2.46518e-15	0.842738	0.0614166	4.18163	1.48965e-21	3.78315	2.47011e-21	1.24121	0.0107383	breast carcinoma amplified sequence 1 [Source:HGNC Symbol;Acc:HGNC:974]
CHI3L2	ENSG00000064886	6.22276	-0.00677038	0.982598	1.27465	0.00140262	-1.28819	0.00105087	-3.04453	5.72532e-25	-1.76311	6.20283e-07	-4.32594	3.33799e-20	-3.03776	8.54688e-20	-3.0513	1.82961e-11	chitinase 3 like 2 [Source:HGNC Symbol;Acc:HGNC:1933]
SBNO2	ENSG00000064932	6.51735	0.352868	3.11313e-05	0.456271	0.000316789	0.249465	0.0451398	0.0384026	0.676391	0.141806	0.282624	-0.0650006	0.628265	-0.314465	0.00125098	0.39127	0.0046248	strawberry notch homolog 2 [Source:HGNC Symbol;Acc:HGNC:29158]
PMS1	ENSG00000064933	4.19133	-0.130043	0.038163	-0.072656	0.470974	-0.187431	0.0411119	-0.259555	1.70751e-05	-0.202168	0.0241303	-0.316942	0.000305304	-0.129512	0.0710987	-0.389598	9.40438e-05	PMS1 homolog 1, mismatch repair system component [Source:HGNC Symbol;Acc:HGNC:9121]
HMG20B	ENSG00000064961	6.80125	0.65656	1.18316e-10	0.588364	9.17429e-05	0.724756	3.66649e-07	0.373925	0.000143554	0.305729	0.0406281	0.44212	0.00155545	-0.282635	0.0145197	1.03048	4.94763e-10	high mobility group 20B [Source:HGNC Symbol;Acc:HGNC:5002]
CALCRL	ENSG00000064989	5.09144	-0.907281	9.86767e-11	-1.07947	3.84063e-08	-0.735097	0.000316944	0.305559	0.025217	0.133374	0.553575	0.477744	0.0134212	1.21284	1.37957e-13	-0.601722	0.00729379	calcitonin receptor like receptor [Source:HGNC Symbol;Acc:HGNC:16709]
TAF11	ENSG00000064995	5.37998	0.339308	7.95219e-07	0.252156	0.0145835	0.426459	1.36301e-05	-0.573611	1.38124e-16	-0.660762	8.46693e-12	-0.48646	7.04063e-07	-0.912919	1.75794e-26	-0.234303	0.0383326	TATA-box binding protein associated factor 11 [Source:HGNC Symbol;Acc:HGNC:11544]
ANKS1A	ENSG00000064999	5.81957	-0.0285593	0.755582	-0.0677166	0.618046	0.0105981	0.940677	-0.494688	4.95123e-10	-0.533845	2.14154e-06	-0.45553	7.35098e-05	-0.466128	5.08617e-07	-0.523247	5.85668e-05	ankyrin repeat and sterile alpha motif domain containing 1A [Source:HGNC Symbol;Acc:HGNC:20961]
AP3D1	ENSG00000065000	7.39836	0.191182	0.00612928	0.161783	0.131972	0.220581	0.0295305	0.101264	0.14938	0.0718648	0.523156	0.130663	0.201676	-0.0899186	0.274261	0.292446	0.00977635	adaptor related protein complex 3 subunit delta 1 [Source:HGNC Symbol;Acc:HGNC:568]
ZNF76	ENSG00000065029	5.25999	0.412963	2.21414e-09	0.353841	0.000509744	0.472084	1.35981e-06	0.152928	0.0243188	0.0938062	0.386466	0.21205	0.0296308	-0.260035	0.000933935	0.565891	3.59313e-07	zinc finger protein 76 [Source:HGNC Symbol;Acc:HGNC:13149]
SLC9A3R2	ENSG00000065054	6.61079	0.324344	0.0233544	-0.136459	0.560981	0.785148	8.14685e-05	0.86527	7.16206e-10	0.404466	0.0563094	1.32607	8.82657e-12	0.540926	0.000863731	1.18961	2.88017e-07	SLC9A3 regulator 2 [Source:HGNC Symbol;Acc:HGNC:11076]
NTHL1	ENSG00000065057	4.34534	0.892259	1.35419e-10	0.832661	5.43067e-05	0.951857	7.62767e-07	0.317162	0.0187775	0.257563	0.221166	0.37676	0.0522544	-0.575098	0.000237929	1.20942	6.87044e-08	nth like DNA glycosylase 1 [Source:HGNC Symbol;Acc:HGNC:8028]
UHRF1BP1	ENSG00000065060	5.58587	-0.342964	0.000348428	-0.37567	0.00758149	-0.310259	0.0298788	-0.0888599	0.372299	-0.121565	0.423184	-0.0561547	0.715598	0.254104	0.0219773	-0.431824	0.00572789	UHRF1 binding protein 1 [Source:HGNC Symbol;Acc:HGNC:21216]
GNAI3	ENSG00000065135	7.06693	-0.099268	0.110493	-0.1039	0.274366	-0.0946359	0.312131	-0.319861	6.58979e-08	-0.324494	0.000140636	-0.315229	0.000237408	-0.220593	0.00144633	-0.419129	1.70657e-05	G protein subunit alpha i3 [Source:HGNC Symbol;Acc:HGNC:4387]
IPO5	ENSG00000065150	7.57468	-0.0888745	0.367612	0.0197923	0.908272	-0.197541	0.158953	-0.586887	1.33506e-10	-0.478221	0.000233101	-0.695554	1.657e-07	-0.498013	2.72616e-06	-0.675762	6.10844e-06	importin 5 [Source:HGNC Symbol;Acc:HGNC:6402]
OAT	ENSG00000065154	7.67502	-0.0979403	0.380176	-0.0451645	0.806992	-0.150716	0.356139	-0.327415	0.00138031	-0.274639	0.0736036	-0.380191	0.0114829	-0.229475	0.0578479	-0.425356	0.0124514	ornithine aminotransferase [Source:HGNC Symbol;Acc:HGNC:8091]
WDR3	ENSG00000065183	6.13466	-0.276634	0.00842649	-0.550149	0.00025764	-0.0031186	0.986981	-0.875445	1.36698e-16	-1.14896	5.41526e-15	-0.60193	5.8507e-05	-0.598812	6.5564e-07	-1.15208	2.63919e-11	WD repeat domain 3 [Source:HGNC Symbol;Acc:HGNC:12755]
PKN2	ENSG00000065243	5.98015	-0.258631	0.00173724	-0.138014	0.289732	-0.379247	0.00175474	-0.06285	0.467814	0.0577662	0.676043	-0.183466	0.131793	0.195781	0.0405693	-0.321481	0.0173147	protein kinase N2 [Source:HGNC Symbol;Acc:HGNC:9406]
WDR18	ENSG00000065268	5.05625	0.76527	1.22662e-10	0.755671	1.80116e-05	0.774869	2.81602e-06	0.135676	0.256437	0.126077	0.504646	0.145275	0.411294	-0.629594	2.9053e-06	0.900946	2.18994e-06	WD repeat domain 18 [Source:HGNC Symbol;Acc:HGNC:17956]
TRAM2	ENSG00000065308	6.00015	-0.368214	1.81469e-05	-0.387883	0.00194817	-0.348545	0.00596962	-0.399223	2.19259e-06	-0.418892	0.000579914	-0.379554	0.00207775	-0.0310089	0.772181	-0.767437	4.55119e-08	translocation associated membrane protein 2 [Source:HGNC Symbol;Acc:HGNC:16855]
NTN1	ENSG00000065320	4.68691	0.536561	0.00211755	0.413386	0.127523	0.659736	0.00793974	-0.495309	0.0038491	-0.618484	0.0127268	-0.372134	0.150762	-1.03187	3.26075e-07	0.0412517	0.902239	netrin 1 [Source:HGNC Symbol;Acc:HGNC:8029]
GLP2R	ENSG00000065325	-1.048	-1.19074	8.24949e-05	-1.44896	0.000568311	-0.932522	0.0437028	-2.05903	2.45089e-11	-2.31725	1.54196e-08	-1.80081	7.51249e-05	-0.86829	0.0115902	-3.24977	6.83924e-10	glucagon like peptide 2 receptor [Source:HGNC Symbol;Acc:HGNC:4325]
MCM10	ENSG00000065328	4.37576	0.436483	0.00123005	0.246741	0.249128	0.626226	0.00108898	-1.98953	1.07061e-37	-2.17927	8.60012e-28	-1.79978	1.57001e-17	-2.42601	5.56481e-39	-1.55304	6.44419e-12	minichromosome maintenance 10 replication initiation factor [Source:HGNC Symbol;Acc:HGNC:18043]
DGKA	ENSG00000065357	4.74066	0.0217815	0.877394	0.0924184	0.651765	-0.0488554	0.810624	0.0711091	0.577292	0.141746	0.46067	0.000472152	0.997963	0.0493276	0.739611	0.0928906	0.669886	diacylglycerol kinase alpha [Source:HGNC Symbol;Acc:HGNC:2849]
ERBB3	ENSG00000065361	8.50593	-0.178045	0.134859	-0.37945	0.025966	0.0233602	0.906943	1.08354	9.32216e-20	0.882137	2.07197e-07	1.28495	1.21706e-15	1.26159	2.84646e-19	0.905497	1.39432e-06	erb-b2 receptor tyrosine kinase 3 [Source:HGNC Symbol;Acc:HGNC:3431]
ROPN1	ENSG00000065371	3.04051	-0.0629278	0.872935	1.02888	0.0582537	-1.15473	0.0351831	-5.18733	2.56145e-29	-4.09552	6.17129e-16	-6.27914	3.63713e-19	-5.1244	2.3625e-24	-5.25026	2.15754e-14	rhophilin associated tail protein 1 [Source:HGNC Symbol;Acc:HGNC:17692]
ANKRD44	ENSG00000065413	3.96508	-0.801286	1.81328e-09	-0.57402	0.0025749	-1.02855	2.34449e-07	-0.180954	0.175088	0.0463122	0.838896	-0.408219	0.0330497	0.620332	4.14758e-05	-0.982239	4.42412e-06	ankyrin repeat domain 44 [Source:HGNC Symbol;Acc:HGNC:25259]
KARS1	ENSG00000065427	7.36898	0.403327	1.96943e-07	0.345567	0.00277147	0.461088	2.84596e-05	-0.677509	6.79476e-18	-0.73527	1.31779e-11	-0.619749	2.50955e-08	-1.08084	1.79899e-28	-0.274182	0.0309458	lysyl-tRNA synthetase 1 [Source:HGNC Symbol;Acc:HGNC:6215]
ADAT1	ENSG00000065457	4.75845	-0.134758	0.0946165	-0.338225	0.00312861	0.0687094	0.58911	-0.0421254	0.616566	-0.245592	0.0314342	0.161342	0.160137	0.0926322	0.320775	-0.176883	0.181079	adenosine deaminase tRNA specific 1 [Source:HGNC Symbol;Acc:HGNC:228]
PDIA5	ENSG00000065485	5.3436	0.0432031	0.685073	0.238974	0.103175	-0.152568	0.301157	-0.888879	8.70973e-20	-0.693108	1.6832e-07	-1.08465	2.0511e-14	-0.932082	2.46605e-16	-0.845676	4.96292e-08	protein disulfide isomerase family A member 5 [Source:HGNC Symbol;Acc:HGNC:24811]
TBC1D22B	ENSG00000065491	4.68876	0.138392	0.0406186	0.267834	0.00703936	0.00894914	0.939462	-0.633825	1.47156e-20	-0.504383	6.14666e-08	-0.763268	6.32319e-15	-0.772217	1.54155e-21	-0.495434	4.02539e-06	TBC1 domain family member 22B [Source:HGNC Symbol;Acc:HGNC:21602]
NDUFB4	ENSG00000065518	6.86646	0.331676	0.000514785	0.178129	0.238665	0.485222	0.000356889	0.0841159	0.397408	-0.0694302	0.662156	0.237662	0.0844775	-0.24756	0.0249466	0.415792	0.00762414	NADH:ubiquinone oxidoreductase subunit B4 [Source:HGNC Symbol;Acc:HGNC:7699]
SPEN	ENSG00000065526	6.74939	-0.269143	0.000510557	-0.295113	0.00970528	-0.243174	0.0349533	-0.0888276	0.263483	-0.114798	0.341785	-0.0628577	0.607109	0.180316	0.044896	-0.357971	0.0045388	spen family transcriptional repressor [Source:HGNC Symbol;Acc:HGNC:17575]
MYLK	ENSG00000065534	7.13089	-0.0798109	0.645635	0.475146	0.0468352	-0.634767	0.00628656	-0.389526	0.0114714	0.16543	0.513174	-0.944483	3.17932e-05	-0.309715	0.088168	-0.469337	0.0695498	myosin light chain kinase [Source:HGNC Symbol;Acc:HGNC:7590]
ZC3H15	ENSG00000065548	6.4085	-0.0220568	0.749644	-0.150555	0.103533	0.106441	0.250819	-0.450297	1.10304e-13	-0.578795	1.36171e-11	-0.321799	0.000192697	-0.42824	1.21864e-09	-0.472354	1.51923e-06	zinc finger CCCH-type containing 15 [Source:HGNC Symbol;Acc:HGNC:29528]
MAP2K4	ENSG00000065559	5.43081	-0.511927	1.12716e-09	-0.373096	0.00208215	-0.650758	1.49853e-07	0.436385	9.66832e-08	0.575216	2.02381e-06	0.297554	0.0112851	0.948312	9.96752e-21	-0.0755423	0.615373	mitogen-activated protein kinase kinase 4 [Source:HGNC Symbol;Acc:HGNC:6844]
PACC1	ENSG00000065600	4.14306	0.313895	0.00014083	0.174967	0.1751	0.452823	0.00011801	-0.810479	2.12498e-21	-0.949407	5.28038e-16	-0.671551	1.70136e-08	-1.12437	2.55776e-27	-0.496584	0.000202841	proton activated chloride channel 1 [Source:HGNC Symbol;Acc:HGNC:25593]
SNAP91	ENSG00000065609	-0.196395	1.37989	4.60025e-06	0.950124	0.0392024	1.80966	1.27083e-05	-0.48682	0.1012	-0.916587	0.0309122	-0.057052	0.907717	-1.86671	1.08338e-07	0.893072	0.0697556	synaptosome associated protein 91 [Source:HGNC Symbol;Acc:HGNC:14986]
SLK	ENSG00000065613	6.63428	-0.408682	4.46827e-07	-0.495141	2.20623e-05	-0.322223	0.00682007	0.191687	0.0166753	0.105229	0.413033	0.278146	0.0149819	0.600369	1.96146e-10	-0.216995	0.107868	STE20 like kinase [Source:HGNC Symbol;Acc:HGNC:11088]
CYB5R4	ENSG00000065615	4.36185	-0.354507	1.52446e-05	-0.332067	0.00574227	-0.376947	0.00177385	-0.303347	0.000162006	-0.280906	0.0179829	-0.325787	0.0057148	0.0511606	0.609506	-0.657854	7.87708e-07	cytochrome b5 reductase 4 [Source:HGNC Symbol;Acc:HGNC:20147]
COL17A1	ENSG00000065618	5.5712	-0.352526	0.314073	-0.943924	0.0519521	0.238873	0.659213	0.170209	0.631451	-0.42119	0.413697	0.761607	0.106113	0.522734	0.178742	-0.182317	0.76554	collagen type XVII alpha 1 chain [Source:HGNC Symbol;Acc:HGNC:2194]
GSTO2	ENSG00000065621	4.61295	0.0343703	0.857705	-0.172475	0.521758	0.241216	0.338741	0.665483	3.50972e-05	0.458637	0.0628748	0.872329	0.000102072	0.631113	0.000804198	0.699853	0.0089293	glutathione S-transferase omega 2 [Source:HGNC Symbol;Acc:HGNC:23064]
SEC61A2	ENSG00000065665	3.63204	0.214859	0.025061	0.0608185	0.710368	0.3689	0.00675264	-0.338278	0.00026361	-0.492319	0.000220657	-0.184237	0.190766	-0.553137	4.07091e-07	-0.123419	0.457487	SEC61 translocon subunit alpha 2 [Source:HGNC Symbol;Acc:HGNC:17702]
PRKCQ	ENSG00000065675	1.94504	-0.159148	0.470378	0.326287	0.318301	-0.644583	0.0359757	-1.27039	4.5568e-10	-0.78496	0.00629447	-1.75583	1.32617e-08	-1.11125	2.41318e-06	-1.42954	1.8337e-05	protein kinase C theta [Source:HGNC Symbol;Acc:HGNC:9410]
TLE2	ENSG00000065717	5.16323	0.557881	0.000259692	0.631096	0.00640572	0.484666	0.0283087	0.14434	0.360859	0.217555	0.367342	0.0711251	0.772357	-0.413541	0.0188586	0.702221	0.00483192	TLE family member 2, transcriptional corepressor [Source:HGNC Symbol;Acc:HGNC:11838]
ASB1	ENSG00000065802	4.39813	-0.00618519	0.945416	0.0243935	0.857964	-0.0367639	0.774253	-0.0710158	0.364805	-0.0404371	0.753748	-0.101595	0.377344	-0.0648306	0.476992	-0.077201	0.568494	ankyrin repeat and SOCS box containing 1 [Source:HGNC Symbol;Acc:HGNC:16011]
FAM107B	ENSG00000065809	6.70567	-0.295191	0.016731	-0.390369	0.0309855	-0.200013	0.291464	0.2653	0.0288048	0.170122	0.378921	0.360477	0.0378677	0.560491	6.61915e-05	-0.0298914	0.898989	family with sequence similarity 107 member B [Source:HGNC Symbol;Acc:HGNC:23726]
ME1	ENSG00000065833	4.76137	-0.414417	0.0287483	-0.734503	0.00665626	-0.0943306	0.765317	-1.00214	6.0492e-08	-1.32223	2.80994e-07	-0.682055	0.0124232	-0.587725	0.00629112	-1.41656	3.80624e-06	malic enzyme 1 [Source:HGNC Symbol;Acc:HGNC:6983]
TBC1D1	ENSG00000065882	6.30727	0.0421402	0.651288	0.336699	0.00726635	-0.252418	0.0428979	-0.930492	5.02171e-26	-0.635934	5.26183e-08	-1.22505	2.05483e-21	-0.972633	1.8358e-21	-0.888352	1.10218e-10	TBC1 domain family member 1 [Source:HGNC Symbol;Acc:HGNC:11578]
CDK13	ENSG00000065883	6.11688	-0.261426	2.57292e-05	-0.390601	1.44758e-05	-0.132251	0.161775	0.0346092	0.603935	-0.0945658	0.328715	0.163784	0.067794	0.296035	3.48588e-05	-0.226817	0.0263926	cyclin dependent kinase 13 [Source:HGNC Symbol;Acc:HGNC:1733]
MTHFD2	ENSG00000065911	7.05865	0.209829	0.0346832	-0.0349928	0.842411	0.454652	0.00111186	-0.85933	6.63036e-18	-1.10415	1.28637e-15	-0.614508	1.17992e-05	-1.06916	2.18872e-19	-0.6495	4.07432e-05	methylenetetrahydrofolate dehydrogenase (NADP+ dependent) 2, methenyltetrahydrofolate cyclohydrolase [Source:HGNC Symbol;Acc:HGNC:7434]
SLC9A7	ENSG00000065923	5.72561	-0.466498	6.28827e-05	-0.416264	0.0152793	-0.516733	0.00274722	-0.37835	0.000960033	-0.328116	0.0545564	-0.428584	0.0110902	0.0881488	0.533389	-0.844848	8.20373e-06	solute carrier family 9 member A7 [Source:HGNC Symbol;Acc:HGNC:17123]
FOXJ2	ENSG00000065970	5.53091	-0.0512506	0.528287	0.0310107	0.814656	-0.133512	0.240705	-0.263612	0.000278814	-0.18135	0.0999598	-0.345873	0.00106996	-0.212361	0.0128288	-0.314862	0.00908157	forkhead box J2 [Source:HGNC Symbol;Acc:HGNC:24818]
YBX1	ENSG00000065978	8.87098	0.60015	8.51927e-12	0.74863	9.37679e-09	0.451671	0.000229545	-1.28762	8.16311e-40	-1.13914	3.53887e-20	-1.4361	8.30719e-26	-1.88777	2.56864e-52	-0.687469	8.78634e-07	Y-box binding protein 1 [Source:HGNC Symbol;Acc:HGNC:8014]
PDE4A	ENSG00000065989	4.68464	-0.260068	0.0852406	-0.16323	0.498719	-0.356906	0.109832	0.651142	6.83667e-06	0.74798	0.000581143	0.554304	0.00704363	0.91121	1.00579e-07	0.391074	0.112079	phosphodiesterase 4A [Source:HGNC Symbol;Acc:HGNC:8780]
PPP2R5A	ENSG00000066027	6.78951	-0.0154613	0.902132	0.166724	0.323882	-0.197646	0.22192	0.32935	0.00146848	0.511535	0.000909293	0.147165	0.35335	0.344812	0.00443815	0.313889	0.072726	protein phosphatase 2 regulatory subunit B'alpha [Source:HGNC Symbol;Acc:HGNC:9309]
CTNNA2	ENSG00000066032	0.233779	0.57604	0.200325	-1.04687	0.10188	2.19895	0.000297739	-1.8912	1.57836e-05	-3.51411	8.72302e-09	-0.268293	0.698836	-2.46724	2.50284e-06	-1.31516	0.0686546	catenin alpha 2 [Source:HGNC Symbol;Acc:HGNC:2510]
ELAVL1	ENSG00000066044	6.83414	0.182518	0.000915765	0.101946	0.240964	0.263091	0.000863869	-0.332051	9.70021e-10	-0.412624	9.79781e-08	-0.251479	0.0013427	-0.51457	3.25509e-15	-0.149533	0.103544	ELAV like RNA binding protein 1 [Source:HGNC Symbol;Acc:HGNC:3312]
TIE1	ENSG00000066056	4.68973	-0.172943	0.153002	-0.125235	0.514396	-0.220651	0.218537	0.423351	0.000216925	0.471059	0.00615281	0.375643	0.0228481	0.596294	9.16884e-06	0.250408	0.204781	tyrosine kinase with immunoglobulin like and EGF like domains 1 [Source:HGNC Symbol;Acc:HGNC:11809]
DIP2B	ENSG00000066084	6.39818	-0.471063	2.09652e-07	-0.677487	1.92448e-07	-0.26464	0.0505867	0.0643804	0.499842	-0.142043	0.310649	0.270804	0.0357736	0.535444	3.04682e-07	-0.406683	0.00578239	disco interacting protein 2 homolog B [Source:HGNC Symbol;Acc:HGNC:29284]
SMARCD1	ENSG00000066117	6.12153	0.0755983	0.19437	0.0403353	0.673469	0.110861	0.18897	-0.100345	0.0726446	-0.135608	0.103293	-0.0650818	0.447354	-0.175943	0.00612444	-0.0247465	0.813721	SWI/SNF related, matrix associated, actin dependent regulator of chromatin, subfamily d, member 1 [Source:HGNC Symbol;Acc:HGNC:11106]
KDM4A	ENSG00000066135	6.1843	-0.0522926	0.516053	0.0344519	0.790921	-0.139037	0.217463	-0.283683	8.17445e-05	-0.196939	0.0694722	-0.370428	0.000412821	-0.231391	0.00624302	-0.335976	0.00498304	lysine demethylase 4A [Source:HGNC Symbol;Acc:HGNC:22978]
NFYC	ENSG00000066136	5.92708	0.342209	5.14238e-09	0.46082	1.10511e-07	0.223598	0.00788044	-0.323785	1.49793e-08	-0.205174	0.0147863	-0.442396	9.70528e-08	-0.665993	4.61768e-21	0.018424	0.868633	nuclear transcription factor Y subunit gamma [Source:HGNC Symbol;Acc:HGNC:7806]
ZMYND12	ENSG00000066185	1.77134	0.181581	0.22435	0.388567	0.0776611	-0.0254052	0.919032	0.657917	2.7917e-06	0.864903	4.05568e-05	0.45093	0.0253082	0.476335	0.00373846	0.839498	0.000303292	zinc finger MYND-type containing 12 [Source:HGNC Symbol;Acc:HGNC:21192]
SLC9A3	ENSG00000066230	-0.376752	-0.351817	0.13076	-1.37318	1.65056e-05	0.669547	0.040291	-0.715674	0.001242	-1.73704	2.02677e-08	0.30569	0.365049	-0.363857	0.169803	-1.06749	0.00366087	solute carrier family 9 member A3 [Source:HGNC Symbol;Acc:HGNC:11073]
NGEF	ENSG00000066248	3.00259	0.0109737	0.959709	0.568542	0.0420874	-0.546595	0.0468379	-0.869088	1.28209e-06	-0.31152	0.261866	-1.42666	1.47063e-07	-0.880062	2.79074e-05	-0.858115	0.00388827	neuronal guanine nucleotide exchange factor [Source:HGNC Symbol;Acc:HGNC:7807]
ASPM	ENSG00000066279	5.4861	-0.075013	0.632706	-0.268833	0.220028	0.118807	0.60473	-1.30188	5.33691e-19	-1.4957	3.94179e-14	-1.10806	9.18989e-08	-1.22687	2.83297e-13	-1.3769	3.83909e-09	abnormal spindle microtubule assembly [Source:HGNC Symbol;Acc:HGNC:19048]
CD84	ENSG00000066294	4.61676	-0.837832	6.90571e-08	-0.709426	0.00138514	-0.966239	2.94458e-05	-0.302808	0.0487968	-0.174401	0.476809	-0.431214	0.0561794	0.535025	0.00253967	-1.14064	5.6432e-06	CD84 molecule [Source:HGNC Symbol;Acc:HGNC:1704]
ELOVL1	ENSG00000066322	6.78083	0.45291	8.98882e-09	0.532826	5.13182e-06	0.372994	0.000847418	-0.59646	2.80498e-14	-0.516545	2.3952e-06	-0.676376	2.15173e-09	-1.04937	9.03402e-27	-0.14355	0.283427	ELOVL fatty acid elongase 1 [Source:HGNC Symbol;Acc:HGNC:14418]
SPI1	ENSG00000066336	4.76119	0.294248	0.0451904	0.58707	0.00722536	0.00142563	0.99585	-0.294553	0.0403271	-0.00173019	0.994698	-0.587375	0.00494321	-0.588801	0.0003826	-0.000304558	0.999418	Spi-1 proto-oncogene [Source:HGNC Symbol;Acc:HGNC:11241]
ZNRD1	ENSG00000066379	4.30054	0.546949	2.07273e-09	0.557136	3.78014e-05	0.536762	2.93146e-05	-0.312414	0.000418447	-0.302227	0.0207769	-0.322601	0.0132417	-0.859363	1.46488e-15	0.234536	0.120706	zinc ribbon domain containing 1 [Source:HGNC Symbol;Acc:HGNC:13182]
MPPED2	ENSG00000066382	2.49997	-0.0755305	0.807063	-0.305854	0.483181	0.154793	0.729518	0.131048	0.650977	-0.099276	0.830204	0.361372	0.36878	0.206579	0.525633	0.0555175	0.915271	metallophosphoesterase domain containing 2 [Source:HGNC Symbol;Acc:HGNC:1180]
CLDN18	ENSG00000066405	-1.31379	-1.37996	3.06703e-08	-1.63742	2.07652e-06	-1.1225	0.00244223	-0.113225	0.670207	-0.370686	0.31976	0.144236	0.712596	1.26673	8.49153e-06	-1.49318	0.000191469	claudin 18 [Source:HGNC Symbol;Acc:HGNC:2039]
ZBTB11	ENSG00000066422	5.10478	-0.388521	1.50609e-08	-0.48725	7.59719e-07	-0.289792	0.00381179	0.0708597	0.313696	-0.0278691	0.813132	0.169588	0.0857108	0.459381	6.48227e-09	-0.317661	0.00420559	zinc finger and BTB domain containing 11 [Source:HGNC Symbol;Acc:HGNC:16740]
ATXN3	ENSG00000066427	4.8969	-0.263926	8.56925e-05	-0.106656	0.318743	-0.421196	2.02796e-05	0.0678675	0.328874	0.225137	0.0233966	-0.0894022	0.383202	0.331794	1.81009e-05	-0.196059	0.0797134	ataxin 3 [Source:HGNC Symbol;Acc:HGNC:7106]
GOLGA5	ENSG00000066455	6.34213	-0.344202	1.9314e-07	-0.378073	7.71271e-05	-0.310331	0.00131734	0.0760532	0.260672	0.0421823	0.70515	0.109924	0.263906	0.420255	3.70028e-08	-0.268149	0.0128647	golgin A5 [Source:HGNC Symbol;Acc:HGNC:4428]
FGFR2	ENSG00000066468	6.16536	-0.856818	0.000534138	-1.49474	1.86453e-05	-0.218899	0.587022	-0.855895	0.000422186	-1.49381	1.05802e-05	-0.217977	0.574058	0.000922108	0.997528	-1.71271	2.5902e-05	fibroblast growth factor receptor 2 [Source:HGNC Symbol;Acc:HGNC:3689]
LRRC40	ENSG00000066557	4.27171	-0.237313	0.00161606	-0.0900781	0.462713	-0.384549	0.000485929	-0.496072	2.98082e-11	-0.348837	0.00109735	-0.643307	3.07933e-09	-0.258759	0.002762	-0.733385	2.59181e-09	leucine rich repeat containing 40 [Source:HGNC Symbol;Acc:HGNC:26004]
ISOC1	ENSG00000066583	5.67598	0.0332532	0.831642	-0.367661	0.0693714	0.434167	0.0265543	1.11259	6.68128e-16	0.711674	0.00034455	1.5135	8.5419e-16	1.07933	1.26761e-11	1.14584	2.32888e-07	isochorismatase domain containing 1 [Source:HGNC Symbol;Acc:HGNC:24254]
EML1	ENSG00000066629	4.16788	-0.5798	2.17388e-07	-0.530031	0.00100932	-0.62957	0.000132514	0.0269243	0.828426	0.0766938	0.681789	-0.0228453	0.90219	0.606724	2.36279e-06	-0.552876	0.00226037	EMAP like 1 [Source:HGNC Symbol;Acc:HGNC:3330]
TRMT11	ENSG00000066651	3.77085	-0.110053	0.229028	-0.112282	0.42753	-0.107824	0.436287	-0.795435	5.32189e-19	-0.797664	6.93549e-11	-0.793206	4.28286e-10	-0.685382	2.03306e-11	-0.905488	2.94773e-10	tRNA methyltransferase 11 homolog [Source:HGNC Symbol;Acc:HGNC:21080]
THUMPD1	ENSG00000066654	6.3173	-0.315835	1.36919e-05	-0.398351	0.000157479	-0.23332	0.030744	0.332144	3.19374e-06	0.249629	0.0199817	0.41466	3.93246e-05	0.64798	5.05532e-14	0.0163091	0.908049	THUMP domain containing 1 [Source:HGNC Symbol;Acc:HGNC:23807]
MSANTD3	ENSG00000066697	4.47229	0.149562	0.0387748	0.256072	0.0167819	0.0430515	0.717116	-0.975475	1.42899e-35	-0.868965	1.25316e-17	-1.08198	5.89122e-23	-1.12504	3.11496e-34	-0.825913	2.26446e-12	Myb/SANT DNA binding domain containing 3 [Source:HGNC Symbol;Acc:HGNC:23370]
KIF26A	ENSG00000066735	2.59646	-0.204942	0.280692	-0.311311	0.268079	-0.098574	0.745577	-0.2909	0.108094	-0.397269	0.138063	-0.184532	0.509676	-0.0859579	0.698367	-0.495843	0.0985239	kinesin family member 26A [Source:HGNC Symbol;Acc:HGNC:20226]
ATG2B	ENSG00000066739	5.47808	-0.626682	7.92105e-15	-0.685439	1.17983e-09	-0.567926	8.88463e-07	0.53986	3.80172e-12	0.481103	2.14111e-05	0.598616	2.81387e-08	1.16654	2.24092e-31	-0.0868229	0.531553	autophagy related 2B [Source:HGNC Symbol;Acc:HGNC:20187]
ARFGEF1	ENSG00000066777	7.19892	0.107452	0.342785	-0.184475	0.268563	0.39938	0.00902199	0.492259	2.34877e-06	0.200332	0.221685	0.784187	7.82619e-08	0.384807	0.00162662	0.599712	0.00050656	ADP ribosylation factor guanine nucleotide exchange factor 1 [Source:HGNC Symbol;Acc:HGNC:15772]
ZFAT	ENSG00000066827	4.14204	0.207	0.0132245	0.100636	0.458266	0.313363	0.00873343	-0.36871	5.39909e-06	-0.475074	4.3859e-05	-0.262347	0.0284881	-0.57571	2.12522e-09	-0.161711	0.251671	zinc finger and AT-hook domain containing [Source:HGNC Symbol;Acc:HGNC:19899]
MTFR1	ENSG00000066855	5.62887	0.654975	9.45465e-10	0.199791	0.231681	1.11016	2.89449e-13	-0.560311	7.02905e-08	-1.0155	6.42864e-12	-0.105128	0.52233	-1.21529	6.72937e-21	0.0946639	0.619976	mitochondrial fission regulator 1 [Source:HGNC Symbol;Acc:HGNC:29510]
STAG3	ENSG00000066923	2.78979	-0.712154	0.000408252	-1.79704	3.6082e-10	0.372737	0.218782	-1.33739	4.07937e-11	-2.42228	1.9519e-17	-0.252503	0.41288	-0.62524	0.00699785	-2.04955	1.52978e-09	stromal antigen 3 [Source:HGNC Symbol;Acc:HGNC:11356]
FECH	ENSG00000066926	5.12187	-0.0305384	0.76112	-0.100991	0.483094	0.0399141	0.7888	0.181718	0.038167	0.111265	0.428156	0.25217	0.0449379	0.212256	0.037265	0.151179	0.318602	ferrochelatase [Source:HGNC Symbol;Acc:HGNC:3647]
MYO9A	ENSG00000066933	5.63592	-0.550818	6.45357e-08	-0.479709	0.00109614	-0.621928	3.37331e-05	0.0987142	0.346494	0.169824	0.282066	0.0276045	0.869998	0.649533	3.29685e-08	-0.452104	0.00618932	myosin IXA [Source:HGNC Symbol;Acc:HGNC:7608]
PFKP	ENSG00000067057	6.61211	0.322973	0.0238396	0.29807	0.178244	0.347876	0.0950955	-2.09694	7.52425e-38	-2.12184	6.57465e-25	-2.07204	5.29566e-20	-2.41991	1.96578e-36	-1.77397	1.2432e-13	phosphofructokinase, platelet [Source:HGNC Symbol;Acc:HGNC:8878]
IDI1	ENSG00000067064	6.27173	-0.0332867	0.785067	-0.346631	0.0285122	0.280058	0.0752734	-0.687116	8.90958e-11	-1.00046	1.9708e-11	-0.373772	0.0154271	-0.653829	1.1888e-07	-0.720403	3.12749e-05	isopentenyl-diphosphate delta isomerase 1 [Source:HGNC Symbol;Acc:HGNC:5387]
SP100	ENSG00000067066	6.21099	-0.225739	0.00948749	-0.142295	0.297788	-0.309182	0.0156151	0.0750172	0.404283	0.158461	0.234891	-0.00842625	0.954177	0.300756	0.00246738	-0.150722	0.310375	SP100 nuclear antigen [Source:HGNC Symbol;Acc:HGNC:11206]
KLF6	ENSG00000067082	7.77	-0.218683	0.0396302	0.138287	0.417589	-0.575653	0.000186877	-0.280574	0.00645113	0.0763958	0.661764	-0.637545	2.16974e-05	-0.0618912	0.62761	-0.499258	0.00329018	Kruppel like factor 6 [Source:HGNC Symbol;Acc:HGNC:2235]
PLPP1	ENSG00000067113	4.85902	-0.174603	0.104728	-0.0340193	0.8567	-0.315187	0.0435906	0.405617	7.49349e-05	0.546201	0.000348994	0.265033	0.0777224	0.58022	1.47287e-06	0.231014	0.190615	phospholipid phosphatase 1 [Source:HGNC Symbol;Acc:HGNC:9228]
NEO1	ENSG00000067141	6.45792	-0.344339	0.00663755	-0.469568	0.0110486	-0.219109	0.260908	0.172879	0.177176	0.04765	0.82732	0.298109	0.101541	0.517218	0.000360638	-0.171459	0.437541	neogenin 1 [Source:HGNC Symbol;Acc:HGNC:7754]
TRAM1	ENSG00000067167	8.24022	0.246871	0.00595303	0.118279	0.416716	0.375464	0.00336606	-0.194684	0.0280774	-0.323277	0.011841	-0.0660919	0.639943	-0.441556	1.68702e-05	0.0521872	0.752097	translocation associated membrane protein 1 [Source:HGNC Symbol;Acc:HGNC:20568]
PHKA1	ENSG00000067177	4.90254	-0.180829	0.099852	-0.36852	0.0193832	0.00686334	0.971437	-0.099507	0.368645	-0.287199	0.0671954	0.0881849	0.598051	0.0813216	0.529865	-0.280336	0.116025	phosphorylase kinase regulatory subunit alpha 1 [Source:HGNC Symbol;Acc:HGNC:8925]
TNFRSF1A	ENSG00000067182	7.03467	0.0790358	0.306233	0.143157	0.21126	0.0149145	0.906144	-0.2344	0.00104491	-0.170279	0.117938	-0.298521	0.00422287	-0.313436	0.000177626	-0.155364	0.20768	TNF receptor superfamily member 1A [Source:HGNC Symbol;Acc:HGNC:11916]
CACNB1	ENSG00000067191	3.21448	0.448113	0.00196085	0.285747	0.209796	0.610478	0.00300243	-0.448763	0.0015621	-0.611129	0.00277608	-0.286398	0.18341	-0.896876	8.66037e-08	-0.000650604	0.99828	calcium voltage-gated channel auxiliary subunit beta 1 [Source:HGNC Symbol;Acc:HGNC:1401]
EVI5	ENSG00000067208	4.38233	-0.466981	2.06784e-08	-0.456387	0.000139229	-0.477574	8.65061e-05	0.0640242	0.460925	0.0746177	0.584115	0.0534307	0.684921	0.531005	3.08364e-08	-0.402957	0.002736	ecotropic viral integration site 5 [Source:HGNC Symbol;Acc:HGNC:3501]
STOML1	ENSG00000067221	3.87898	0.495034	3.81914e-08	0.68154	4.16642e-07	0.308528	0.0174813	-0.151009	0.0931464	0.0354973	0.818721	-0.337515	0.00877574	-0.646043	5.69685e-10	0.344026	0.0190299	stomatin like 1 [Source:HGNC Symbol;Acc:HGNC:14560]
PKM	ENSG00000067225	10.2465	0.147514	0.141446	0.121089	0.445502	0.173939	0.237689	-0.449986	2.15323e-06	-0.476411	0.000495866	-0.42356	0.00232396	-0.5975	9.63197e-08	-0.302471	0.0592562	pyruvate kinase M1/2 [Source:HGNC Symbol;Acc:HGNC:9021]
DHX29	ENSG00000067248	5.87726	-0.375289	5.98248e-07	-0.420183	0.000112006	-0.330395	0.00273743	0.434951	4.36183e-09	0.390057	0.000353678	0.479844	3.85482e-06	0.810239	4.76562e-19	0.0596617	0.662526	DExH-box helicase 29 [Source:HGNC Symbol;Acc:HGNC:15815]
DNTTIP2	ENSG00000067334	6.33355	0.080318	0.227729	0.0998193	0.326868	0.0608167	0.552245	-0.418518	3.02694e-11	-0.399017	7.88293e-06	-0.438019	1.31386e-06	-0.498836	1.86431e-11	-0.3382	0.00101852	deoxynucleotidyltransferase terminal interacting protein 2 [Source:HGNC Symbol;Acc:HGNC:24013]
METTL22	ENSG00000067365	3.60144	0.111438	0.128437	-0.0527568	0.663274	0.275632	0.00708956	0.146214	0.0384851	-0.0179808	0.885138	0.310408	0.00175701	0.0347761	0.69103	0.257652	0.0269263	methyltransferase like 22 [Source:HGNC Symbol;Acc:HGNC:28368]
TP53BP1	ENSG00000067369	5.88125	-0.676031	7.2584e-14	-0.774082	9.35562e-10	-0.577979	8.33911e-06	0.410024	1.89293e-06	0.311972	0.0159006	0.508075	2.80167e-05	1.08605	1.53762e-23	-0.266007	0.0673917	tumor protein p53 binding protein 1 [Source:HGNC Symbol;Acc:HGNC:11999]
TRO	ENSG00000067445	3.36438	-0.225012	0.208966	-0.437942	0.0891575	-0.0120817	0.968306	-0.206458	0.238358	-0.419388	0.0972973	0.00647183	0.982588	0.0185536	0.932188	-0.43147	0.132981	trophinin [Source:HGNC Symbol;Acc:HGNC:12326]
RRP15	ENSG00000067533	5.22602	0.045013	0.61375	0.0451761	0.747936	0.04485	0.739495	-0.182732	0.0218051	-0.182569	0.129421	-0.182895	0.122285	-0.227745	0.013971	-0.137719	0.319832	ribosomal RNA processing 15 homolog [Source:HGNC Symbol;Acc:HGNC:24255]
RHOA	ENSG00000067560	9.15115	-0.128076	0.0476077	-0.180924	0.0579368	-0.0752275	0.455252	0.0333454	0.624895	-0.0195029	0.860135	0.0861937	0.368654	0.161421	0.0277977	-0.0947304	0.390995	ras homolog family member A [Source:HGNC Symbol;Acc:HGNC:667]
DHX8	ENSG00000067596	6.15764	-0.0864548	0.21733	-0.15463	0.13151	-0.0182797	0.874607	0.115151	0.0867583	0.0469759	0.675241	0.183326	0.0565171	0.201606	0.00892823	0.0286962	0.820501	DEAH-box helicase 8 [Source:HGNC Symbol;Acc:HGNC:2749]
PMS2P4	ENSG00000067601	0.916056	0.0524405	0.553477	0.0863809	0.517172	0.0185001	0.894598	0.0583299	0.490847	0.0922704	0.475199	0.0243895	0.854364	0.00588948	0.953956	0.11077	0.431356	PMS1 homolog 2, mismatch repair system component pseudogene 4 [Source:HGNC Symbol;Acc:HGNC:9129]
PRKCZ	ENSG00000067606	4.38672	0.306844	0.00175491	0.225646	0.138128	0.388041	0.00583447	-0.0904635	0.373256	-0.171661	0.252333	-0.00926597	0.955505	-0.397307	0.000410511	0.21638	0.191018	protein kinase C zeta [Source:HGNC Symbol;Acc:HGNC:9412]
IARS2	ENSG00000067704	7.69964	-0.0438815	0.661657	-0.0791868	0.599989	-0.0085762	0.957142	0.132821	0.143884	0.0975153	0.501663	0.168126	0.203918	0.176702	0.0915563	0.0889391	0.581006	isoleucyl-tRNA synthetase 2, mitochondrial [Source:HGNC Symbol;Acc:HGNC:29685]
SYT1	ENSG00000067715	5.24302	-0.865032	0.00691235	-1.29864	0.00432554	-0.431426	0.390402	4.31437	2.34999e-27	3.88077	3.02153e-12	4.74798	7.77179e-23	5.1794	4.07194e-28	3.44934	1.21842e-09	synaptotagmin 1 [Source:HGNC Symbol;Acc:HGNC:11509]
NAV3	ENSG00000067798	3.30326	-0.718616	0.0015445	-0.922594	0.00469607	-0.514639	0.136657	2.24475	4.50893e-20	2.04077	8.66701e-09	2.44873	7.71015e-15	2.96337	2.27296e-23	1.52614	4.2699e-05	neuron navigator 3 [Source:HGNC Symbol;Acc:HGNC:15998]
IDH3G	ENSG00000067829	5.93317	0.505801	9.51487e-09	0.388274	0.00300691	0.623328	5.55389e-07	-0.35613	3.18658e-05	-0.473657	0.000118037	-0.238603	0.0611824	-0.861931	1.75836e-16	0.149671	0.320494	isocitrate dehydrogenase (NAD(+)) 3 non-catalytic subunit gamma [Source:HGNC Symbol;Acc:HGNC:5386]
ROGDI	ENSG00000067836	5.34232	0.346406	0.00108348	0.0278255	0.88608	0.664987	9.66493e-06	0.990222	1.26977e-19	0.671641	1.44456e-05	1.3088	1.81492e-18	0.643816	1.50426e-07	1.33663	6.73392e-14	rogdi atypical leucine zipper [Source:HGNC Symbol;Acc:HGNC:29478]
PDZD4	ENSG00000067840	2.45032	1.19095	7.00155e-07	0.779341	0.0330048	1.60256	1.34553e-06	-0.0984185	0.700835	-0.510026	0.146885	0.313189	0.376695	-1.28937	2.81464e-06	1.09253	0.00490091	PDZ domain containing 4 [Source:HGNC Symbol;Acc:HGNC:21167]
ATP2B3	ENSG00000067842	-1.47597	0.758316	0.0154906	0.0855897	0.877185	1.43104	0.00188928	-3.46278	2.66353e-22	-4.13551	6.39189e-19	-2.79006	1.53789e-08	-4.2211	1.47596e-22	-2.70447	3.0007e-07	ATPase plasma membrane Ca2+ transporting 3 [Source:HGNC Symbol;Acc:HGNC:816]
ROCK1	ENSG00000067900	6.2586	-0.401029	1.2903e-05	-0.299959	0.0282191	-0.502099	0.000207431	-0.022753	0.824378	0.0783169	0.606558	-0.123823	0.377292	0.378276	0.000347103	-0.423782	0.00466794	Rho associated coiled-coil containing protein kinase 1 [Source:HGNC Symbol;Acc:HGNC:10251]
CBFB	ENSG00000067955	5.96528	-0.0357658	0.651588	-0.0513361	0.672378	-0.0201956	0.869419	-0.634175	1.76706e-18	-0.649745	7.3963e-11	-0.618604	1.5135e-09	-0.598409	7.61954e-13	-0.66994	7.60199e-09	core-binding factor subunit beta [Source:HGNC Symbol;Acc:HGNC:1539]
PDK3	ENSG00000067992	4.64634	0.0840636	0.567691	0.502271	0.0130377	-0.334144	0.0979099	-1.02615	2.66429e-14	-0.607944	0.00123455	-1.44436	8.04438e-13	-1.11021	1.98217e-12	-0.942087	1.40052e-05	pyruvate dehydrogenase kinase 3 [Source:HGNC Symbol;Acc:HGNC:8811]
HYAL2	ENSG00000068001	5.80608	0.214392	0.0195318	0.229649	0.100909	0.199135	0.142444	0.0253728	0.800858	0.0406294	0.79533	0.0101162	0.947569	-0.189019	0.0734696	0.239765	0.11391	hyaluronidase 2 [Source:HGNC Symbol;Acc:HGNC:5321]
HDAC4	ENSG00000068024	4.17773	-0.297917	0.000431695	-0.170676	0.194039	-0.425158	0.000635132	-0.37896	4.99326e-06	-0.251719	0.0420247	-0.506201	2.94631e-05	-0.0810429	0.425975	-0.676877	8.60495e-07	histone deacetylase 4 [Source:HGNC Symbol;Acc:HGNC:14063]
RASSF1	ENSG00000068028	5.00705	0.404185	2.11552e-06	0.58988	3.81749e-06	0.21849	0.083353	-0.0338488	0.715134	0.151846	0.249597	-0.219544	0.0779649	-0.438034	7.85217e-06	0.370337	0.00769555	Ras association domain family member 1 [Source:HGNC Symbol;Acc:HGNC:9882]
FGFR3	ENSG00000068078	4.98868	0.857468	0.000608013	0.318629	0.435979	1.39631	5.88211e-05	1.82679	1.16889e-12	1.28795	0.000626627	2.36563	5.13323e-12	0.969324	0.000745351	2.68426	5.3502e-10	fibroblast growth factor receptor 3 [Source:HGNC Symbol;Acc:HGNC:3690]
IFI35	ENSG00000068079	5.48681	0.411053	0.00657751	0.526317	0.0216291	0.29579	0.19017	0.51458	0.000492184	0.629844	0.00465513	0.399317	0.0626709	0.103527	0.570743	0.925634	0.000155944	interferon induced protein 35 [Source:HGNC Symbol;Acc:HGNC:5399]
HEATR6	ENSG00000068097	4.87382	-0.0615764	0.588364	-0.409938	0.00650135	0.286785	0.0580988	0.461666	4.86541e-06	0.113305	0.495509	0.810027	1.0912e-08	0.523242	1.01845e-05	0.40009	0.0177347	HEAT repeat containing 6 [Source:HGNC Symbol;Acc:HGNC:24076]
COASY	ENSG00000068120	6.28497	0.485244	7.75218e-08	0.254664	0.0639816	0.715824	2.45523e-08	0.536329	1.58476e-09	0.305749	0.0214243	0.766909	6.52889e-10	0.0510856	0.642615	1.02157	7.67239e-12	Coenzyme A synthase [Source:HGNC Symbol;Acc:HGNC:29932]
PLEKHH3	ENSG00000068137	5.31127	0.423022	0.000113826	0.34944	0.0364479	0.496604	0.00149825	0.715006	5.74792e-11	0.641424	6.37404e-05	0.788588	1.66207e-07	0.291984	0.0212057	1.13803	3.72525e-10	pleckstrin homology, MyTH4 and FERM domain containing H3 [Source:HGNC Symbol;Acc:HGNC:26105]
MEF2A	ENSG00000068305	5.99653	-0.265807	0.00685316	-0.331968	0.0217303	-0.199646	0.180802	-0.0537862	0.607496	-0.119947	0.438889	0.0123751	0.940102	0.212021	0.0619627	-0.319593	0.0475978	myocyte enhancer factor 2A [Source:HGNC Symbol;Acc:HGNC:6993]
OTUD5	ENSG00000068308	6.25975	0.229826	0.000508369	0.263676	0.00781008	0.195975	0.043911	-0.0318776	0.655666	0.00197304	0.987508	-0.0657282	0.522611	-0.261703	0.000571249	0.197948	0.0715233	OTU deubiquitinase 5 [Source:HGNC Symbol;Acc:HGNC:25402]
TFE3	ENSG00000068323	6.04916	0.146052	0.0188902	0.12996	0.175849	0.162144	0.0750515	-0.207352	0.000586406	-0.223444	0.0118599	-0.19126	0.0313694	-0.353404	6.14647e-07	-0.0612998	0.578413	transcription factor binding to IGHM enhancer 3 [Source:HGNC Symbol;Acc:HGNC:11752]
TBC1D25	ENSG00000068354	4.40599	0.16876	0.00988041	0.249845	0.0103092	0.0876759	0.387923	-0.122689	0.0588708	-0.0416048	0.70339	-0.203774	0.0298486	-0.29145	9.21239e-05	0.0460711	0.698395	TBC1 domain family member 25 [Source:HGNC Symbol;Acc:HGNC:8092]
ACSL4	ENSG00000068366	5.53192	-0.297813	0.0100581	0.0431071	0.834807	-0.638734	0.000169751	-0.758698	3.21473e-11	-0.417777	0.0112081	-1.09962	9.3917e-11	-0.460885	0.000477362	-1.05651	2.06347e-08	acyl-CoA synthetase long chain family member 4 [Source:HGNC Symbol;Acc:HGNC:3571]
INPP5A	ENSG00000068383	4.59326	-0.173235	0.023701	-0.314082	0.00454412	-0.0323872	0.801077	-0.0681323	0.38597	-0.20898	0.0603036	0.0727152	0.534861	0.105102	0.239723	-0.241367	0.0534346	inositol polyphosphate-5-phosphatase A [Source:HGNC Symbol;Acc:HGNC:6076]
GPKOW	ENSG00000068394	4.8102	0.242994	0.00444828	0.246617	0.0572658	0.239372	0.0557925	-0.131416	0.125647	-0.127793	0.333687	-0.135038	0.292607	-0.37441	0.000125444	0.111579	0.455036	G-patch domain and KOW motifs [Source:HGNC Symbol;Acc:HGNC:30677]
GRIPAP1	ENSG00000068400	5.71308	0.235662	0.000826606	0.0824274	0.477376	0.388897	0.000109572	0.115708	0.10284	-0.0375268	0.754918	0.268943	0.00674177	-0.119954	0.146526	0.35137	0.00214355	GRIP1 associated protein 1 [Source:HGNC Symbol;Acc:HGNC:18706]
FTSJ1	ENSG00000068438	5.46953	0.223546	0.000299105	0.177663	0.0595132	0.26943	0.0024656	-0.439646	9.83287e-13	-0.485529	2.33266e-08	-0.393762	7.74589e-06	-0.663192	6.15002e-19	-0.216099	0.0337826	FtsJ RNA 2'-O-methyltransferase 1 [Source:HGNC Symbol;Acc:HGNC:13254]
PRR11	ENSG00000068489	4.78937	0.526837	0.000280794	-0.130921	0.58936	1.18459	8.4585e-09	-1.41419	1.04815e-20	-2.07195	5.42548e-23	-0.756433	0.0003118	-1.94103	9.19183e-26	-0.887355	0.000164347	proline rich 11 [Source:HGNC Symbol;Acc:HGNC:25619]
REEP1	ENSG00000068615	4.21391	-0.905463	3.66643e-05	-1.70482	3.88274e-08	-0.10611	0.774363	1.52782	6.73528e-12	0.728465	0.0267271	2.32717	1.76708e-14	2.43328	1.1499e-18	0.622355	0.087395	receptor accessory protein 1 [Source:HGNC Symbol;Acc:HGNC:25786]
ATP11A	ENSG00000068650	5.55837	-0.139732	0.278584	-0.227752	0.231207	-0.0517119	0.803585	-1.3237	1.41677e-24	-1.41172	2.62915e-16	-1.23568	1.169e-11	-1.18397	6.89347e-16	-1.46344	9.16637e-13	ATPase phospholipid transporting 11A [Source:HGNC Symbol;Acc:HGNC:13552]
POLR1A	ENSG00000068654	6.3548	-0.0440616	0.54725	-0.187369	0.0611665	0.0992459	0.335331	-0.53506	1.28766e-15	-0.678368	5.17171e-13	-0.391752	3.48045e-05	-0.490998	2.27536e-10	-0.579122	8.58757e-08	RNA polymerase I subunit A [Source:HGNC Symbol;Acc:HGNC:17264]
LAPTM4A	ENSG00000068697	8.80023	0.00463655	0.95862	0.112866	0.350533	-0.103593	0.379803	-0.135692	0.0710004	-0.027463	0.832536	-0.243921	0.0244433	-0.140329	0.10945	-0.131056	0.309738	lysosomal protein transmembrane 4 alpha [Source:HGNC Symbol;Acc:HGNC:6924]
TTC7A	ENSG00000068724	5.51715	0.240233	0.00274911	0.41082	0.000572401	0.0696448	0.591985	-1.08626	6.44492e-35	-0.91567	7.10365e-16	-1.25685	7.82398e-24	-1.32649	1.99666e-36	-0.846025	1.32189e-10	tetratricopeptide repeat domain 7A [Source:HGNC Symbol;Acc:HGNC:19750]
IP6K2	ENSG00000068745	6.22238	0.109067	0.0931006	0.00772674	0.948913	0.210407	0.0223402	0.164226	0.00844051	0.0628856	0.541158	0.265566	0.00273632	0.0551588	0.468904	0.273292	0.00793537	inositol hexakisphosphate kinase 2 [Source:HGNC Symbol;Acc:HGNC:17313]
SRBD1	ENSG00000068784	4.65583	-0.518049	8.50036e-15	-0.683482	4.14781e-13	-0.352615	0.000191692	0.0355283	0.608255	-0.129905	0.1855	0.200962	0.0292715	0.553577	3.65799e-13	-0.48252	4.01359e-06	S1 RNA binding domain 1 [Source:HGNC Symbol;Acc:HGNC:25521]
KIF2A	ENSG00000068796	5.01979	-0.449281	2.99785e-06	-0.514266	0.000216136	-0.384296	0.0068309	-0.116245	0.237214	-0.181229	0.215658	-0.0512601	0.740522	0.333036	0.00261192	-0.565526	0.000285711	kinesin family member 2A [Source:HGNC Symbol;Acc:HGNC:6318]
RASGRP2	ENSG00000068831	2.51611	0.458321	0.0203887	0.809215	0.00666092	0.107427	0.742295	0.185926	0.356835	0.53682	0.0691126	-0.164968	0.591829	-0.272395	0.236766	0.644247	0.0460126	RAS guanyl releasing protein 2 [Source:HGNC Symbol;Acc:HGNC:9879]
PSME4	ENSG00000068878	7.51736	-0.259817	0.001641	-0.282531	0.0207699	-0.237102	0.0545578	-1.0384	2.75159e-31	-1.06111	2.89084e-19	-1.01568	2.12949e-16	-0.778582	2.16042e-15	-1.29822	5.22674e-20	proteasome activator subunit 4 [Source:HGNC Symbol;Acc:HGNC:20635]
IFT80	ENSG00000068885	3.9085	-0.123889	0.105697	-0.133291	0.252982	-0.114487	0.322272	0.0352457	0.660628	0.0258438	0.841097	0.0446475	0.706838	0.159135	0.0655096	-0.0886435	0.500219	intraflagellar transport 80 [Source:HGNC Symbol;Acc:HGNC:29262]
SIRT2	ENSG00000068903	5.89666	0.366781	2.66353e-05	0.519142	7.126e-05	0.214419	0.0986846	-0.326734	0.000136253	-0.174372	0.188161	-0.479096	0.000126632	-0.693515	1.29064e-11	0.0400462	0.807778	sirtuin 2 [Source:HGNC Symbol;Acc:HGNC:10886]
ERLEC1	ENSG00000068912	6.5247	-0.237287	0.000389923	-0.318273	0.00110167	-0.156301	0.122384	0.122489	0.0679297	0.0415031	0.714442	0.203475	0.0332801	0.359776	3.07252e-06	-0.114798	0.319925	endoplasmic reticulum lectin 1 [Source:HGNC Symbol;Acc:HGNC:25222]
PPP2R5B	ENSG00000068971	4.28845	0.459755	2.17585e-08	0.422234	0.000526657	0.497275	1.88337e-05	-0.156519	0.0550435	-0.194039	0.111041	-0.118999	0.336428	-0.616273	9.9982e-11	0.303236	0.023562	protein phosphatase 2 regulatory subunit B'beta [Source:HGNC Symbol;Acc:HGNC:9310]
PYGM	ENSG00000068976	0.0617923	0.201439	0.152542	0.379471	0.0692061	0.0234067	0.921341	0.363468	0.00666478	0.541499	0.00696015	0.185436	0.36399	0.162029	0.314922	0.564906	0.0109855	glycogen phosphorylase, muscle associated [Source:HGNC Symbol;Acc:HGNC:9726]
PITX1	ENSG00000069011	5.22671	0.61761	0.00543049	0.603835	0.0779902	0.631386	0.0485346	-0.0933049	0.696314	-0.107081	0.776212	-0.0795292	0.825772	-0.710915	0.00514096	0.524305	0.157839	paired like homeodomain 1 [Source:HGNC Symbol;Acc:HGNC:9004]
MAST4	ENSG00000069020	5.89486	-0.688463	7.04597e-07	-0.925503	2.81529e-06	-0.451422	0.028938	1.78523	3.35649e-31	1.54819	4.25469e-13	2.02227	3.03458e-24	2.4737	1.93733e-38	1.09677	1.23702e-06	microtubule associated serine/threonine kinase family member 4 [Source:HGNC Symbol;Acc:HGNC:19037]
ADGRF5	ENSG00000069122	5.17462	-0.652881	1.10004e-09	-0.657757	1.53525e-05	-0.648005	3.56212e-05	0.144867	0.178071	0.139992	0.405695	0.149743	0.347339	0.797748	1.22224e-10	-0.508014	0.00316384	adhesion G protein-coupled receptor F5 [Source:HGNC Symbol;Acc:HGNC:19030]
SDK2	ENSG00000069188	3.61367	0.794742	0.00160159	0.481649	0.227536	1.10783	0.00167432	-0.336134	0.186135	-0.649226	0.0749826	-0.0230409	0.956768	-1.13088	9.56381e-05	0.458608	0.284448	sidekick cell adhesion molecule 2 [Source:HGNC Symbol;Acc:HGNC:19308]
NUP133	ENSG00000069248	6.49691	-0.255989	0.000823543	-0.11911	0.328192	-0.392868	0.000462384	-0.0261813	0.755015	0.110698	0.358408	-0.163061	0.149955	0.229807	0.00916274	-0.28217	0.0246271	nucleoporin 133 [Source:HGNC Symbol;Acc:HGNC:18016]
NUCKS1	ENSG00000069275	9.16187	-0.121334	0.142726	-0.0392298	0.780046	-0.203437	0.090626	-0.11903	0.140897	-0.0369261	0.788163	-0.201134	0.0855047	0.00230379	0.981889	-0.240363	0.0697778	nuclear casein kinase and cyclin dependent kinase substrate 1 [Source:HGNC Symbol;Acc:HGNC:29923]
VPS35	ENSG00000069329	7.562	-0.000510143	0.996228	-0.186099	0.155419	0.185078	0.147267	-0.247475	0.00315729	-0.433064	0.000320843	-0.0618868	0.646896	-0.246965	0.0119152	-0.247985	0.0798841	VPS35 retromer complex component [Source:HGNC Symbol;Acc:HGNC:13487]
DNAJA2	ENSG00000069345	6.45327	0.18325	0.0213847	-0.0149295	0.919251	0.38143	0.000687178	0.0151208	0.864818	-0.183059	0.119592	0.213301	0.0588221	-0.16813	0.0660182	0.198371	0.132347	DnaJ heat shock protein family (Hsp40) member A2 [Source:HGNC Symbol;Acc:HGNC:14884]
BCL3	ENSG00000069399	6.12875	0.240531	0.0566042	0.15248	0.451838	0.328582	0.0708443	0.199413	0.109016	0.111362	0.584348	0.287464	0.107628	-0.0411176	0.789651	0.439944	0.0305009	BCL3 transcription coactivator [Source:HGNC Symbol;Acc:HGNC:998]
KCNAB2	ENSG00000069424	4.56281	0.183631	0.126824	0.233042	0.203615	0.134221	0.465195	-0.240373	0.0380742	-0.190962	0.286027	-0.289783	0.0901574	-0.424004	0.00152591	-0.0567412	0.794513	potassium voltage-gated channel subfamily A regulatory beta subunit 2 [Source:HGNC Symbol;Acc:HGNC:6229]
ABCC9	ENSG00000069431	3.61655	-0.955162	1.6851e-10	-0.948743	5.80686e-06	-0.961581	1.27036e-05	0.050971	0.750981	0.0573897	0.821261	0.0445524	0.853976	1.00613	4.2573e-09	-0.904191	0.000147983	ATP binding cassette subfamily C member 9 [Source:HGNC Symbol;Acc:HGNC:60]
GAL	ENSG00000069482	2.95353	1.26257	7.24962e-07	1.57308	5.74899e-05	0.952067	0.00786185	-3.40782	4.16259e-30	-3.09732	6.35685e-18	-3.71833	1.50615e-17	-4.67039	8.52632e-36	-2.14525	3.39431e-07	galanin and GMAP prepropeptide [Source:HGNC Symbol;Acc:HGNC:4114]
CLEC2D	ENSG00000069493	3.97632	-0.266903	0.0709748	-0.205198	0.374516	-0.328609	0.134673	0.122416	0.41577	0.184121	0.424786	0.0607105	0.795982	0.389319	0.0195706	-0.144488	0.576601	C-type lectin domain family 2 member D [Source:HGNC Symbol;Acc:HGNC:14351]
FUNDC1	ENSG00000069509	4.49249	0.0530224	0.585033	-0.195923	0.146124	0.301968	0.0178661	0.193631	0.0264793	-0.0553152	0.708712	0.442577	0.000285562	0.140608	0.173514	0.246653	0.0920465	FUN14 domain containing 1 [Source:HGNC Symbol;Acc:HGNC:28746]
MAOB	ENSG00000069535	6.27155	0.456816	0.111321	0.631744	0.15059	0.281887	0.523524	0.85307	0.00193579	1.028	0.0148934	0.678141	0.0866799	0.396254	0.227299	1.30989	0.00430559	monoamine oxidase B [Source:HGNC Symbol;Acc:HGNC:6834]
RORA	ENSG00000069667	4.41692	-0.57187	9.59463e-06	-0.508049	0.00700709	-0.635691	0.00088786	0.307717	0.0161374	0.371538	0.0548794	0.243895	0.198494	0.879587	5.11583e-09	-0.264153	0.228384	RAR related orphan receptor A [Source:HGNC Symbol;Acc:HGNC:10258]
DRD4	ENSG00000069696	-0.121866	0.65401	0.000403656	0.964285	0.000603202	0.343735	0.216689	-0.193555	0.308098	0.11672	0.708852	-0.50383	0.0630978	-0.847565	6.58935e-05	0.460455	0.13706	dopamine receptor D4 [Source:HGNC Symbol;Acc:HGNC:3025]
TGFBR3	ENSG00000069702	5.62412	-0.102112	0.66039	0.536535	0.09859	-0.740759	0.0182724	0.908954	9.97781e-06	1.5476	1.08913e-06	0.270307	0.388144	1.01107	2.7769e-05	0.806842	0.0186626	transforming growth factor beta receptor 3 [Source:HGNC Symbol;Acc:HGNC:11774]
PLA2G10	ENSG00000069764	-0.693882	-0.506788	0.0125228	-0.999231	0.000624117	-0.0143448	0.967648	2.11954	2.55461e-22	1.6271	1.19778e-07	2.61198	1.00936e-19	2.62633	1.25119e-23	1.61275	1.25753e-06	phospholipase A2 group X [Source:HGNC Symbol;Acc:HGNC:9029]
HES2	ENSG00000069812	2.8335	0.546809	0.0571507	0.0690754	0.894063	1.02454	0.0102682	-0.082846	0.78936	-0.56058	0.182152	0.394888	0.346044	-0.629655	0.0539384	0.463963	0.339424	hes family bHLH transcription factor 2 [Source:HGNC Symbol;Acc:HGNC:16005]
ATP1B3	ENSG00000069849	6.87863	0.161968	0.13074	-0.204995	0.202391	0.52893	0.000329172	-0.972792	8.15222e-20	-1.33975	1.61017e-19	-0.605829	4.71143e-05	-1.13476	2.30812e-19	-0.810824	1.47159e-06	ATPase Na+/K+ transporting subunit beta 3 [Source:HGNC Symbol;Acc:HGNC:806]
NEDD4	ENSG00000069869	4.55317	-0.843554	1.88916e-14	-0.919914	1.74547e-09	-0.767194	1.35668e-06	0.286763	0.00628163	0.210403	0.198358	0.363123	0.0155766	1.13032	2.01383e-18	-0.556791	0.00125923	NEDD4 E3 ubiquitin protein ligase [Source:HGNC Symbol;Acc:HGNC:7727]
PIGB	ENSG00000069943	3.49768	-0.360082	2.89125e-07	-0.2241	0.0319703	-0.496064	1.6112e-06	0.411372	2.68799e-09	0.547353	7.92006e-08	0.27539	0.00522022	0.771454	1.05362e-19	0.0512896	0.688924	phosphatidylinositol glycan anchor biosynthesis class B [Source:HGNC Symbol;Acc:HGNC:8959]
MAPK6	ENSG00000069956	5.87057	-0.384342	9.50853e-06	-0.327504	0.010378	-0.441179	0.000545132	-0.465708	4.98486e-08	-0.40887	0.000897188	-0.522545	2.62029e-05	-0.0813662	0.435861	-0.850049	2.39777e-09	mitogen-activated protein kinase 6 [Source:HGNC Symbol;Acc:HGNC:6879]
GNB5	ENSG00000069966	4.33974	-0.113437	0.203676	-0.0720203	0.617277	-0.154854	0.238347	0.430775	2.83896e-07	0.472191	0.000143924	0.389358	0.00107431	0.544212	3.73335e-08	0.317338	0.0235406	G protein subunit beta 5 [Source:HGNC Symbol;Acc:HGNC:4401]
RAB27A	ENSG00000069974	4.88045	-0.396821	1.14926e-05	-0.0303905	0.852224	-0.763251	1.9838e-08	-0.243856	0.00629851	0.122574	0.393459	-0.610287	2.64814e-06	0.152965	0.149632	-0.640677	1.2516e-05	RAB27A, member RAS oncogene family [Source:HGNC Symbol;Acc:HGNC:9766]
HDHD5	ENSG00000069998	5.37551	0.548856	4.0283e-10	0.438438	0.000701498	0.659274	9.64125e-08	-0.532472	5.09898e-10	-0.64289	1.09607e-07	-0.422054	0.000660983	-1.08133	6.94737e-24	0.0163836	0.922822	haloacid dehalogenase like hydrolase domain containing 5 [Source:HGNC Symbol;Acc:HGNC:1843]
UFD1	ENSG00000070010	5.99952	0.228748	0.00195875	-0.0159905	0.907369	0.473486	6.75678e-06	-0.419876	7.40862e-09	-0.664614	1.36242e-10	-0.175138	0.105739	-0.648624	9.38846e-14	-0.191129	0.121256	ubiquitin recognition factor in ER associated degradation 1 [Source:HGNC Symbol;Acc:HGNC:12520]
LRP6	ENSG00000070018	6.12724	-0.45191	0.000261382	-0.145888	0.469659	-0.757932	3.87638e-05	-0.699405	1.06661e-08	-0.393383	0.0281854	-1.00543	2.87594e-08	-0.247495	0.0863588	-1.15131	1.56454e-08	LDL receptor related protein 6 [Source:HGNC Symbol;Acc:HGNC:6698]
GUCY2C	ENSG00000070019	0.858627	-0.429511	0.00762653	-0.664051	0.00413604	-0.194971	0.443315	-0.0918604	0.590678	-0.326401	0.174135	0.14268	0.566164	0.337651	0.0694927	-0.521372	0.0483528	guanylate cyclase 2C [Source:HGNC Symbol;Acc:HGNC:4688]
SCT	ENSG00000070031	-0.459906	0.534736	0.0201364	0.43275	0.231266	0.636721	0.0540068	-0.0104505	0.968857	-0.112436	0.772031	0.0915352	0.803753	-0.545186	0.0382683	0.524285	0.171155	secretin [Source:HGNC Symbol;Acc:HGNC:10607]
PHRF1	ENSG00000070047	5.78301	0.402788	1.7375e-07	0.341715	0.00292379	0.463861	2.27661e-05	0.171961	0.0241681	0.110888	0.35948	0.233034	0.0333962	-0.230827	0.00909845	0.574749	3.98318e-06	PHD and ring finger domains 1 [Source:HGNC Symbol;Acc:HGNC:24351]
ELP1	ENSG00000070061	5.81571	-0.228549	0.00108444	-0.223376	0.0321653	-0.233722	0.0240643	0.234072	0.000650295	0.239245	0.02034	0.228899	0.0212395	0.462621	1.14445e-08	0.00552296	0.967949	elongator complex protein 1 [Source:HGNC Symbol;Acc:HGNC:5959]
NUCB2	ENSG00000070081	7.34133	-0.528627	0.000177254	-0.741915	0.000249884	-0.315338	0.141699	0.812984	6.06036e-09	0.599696	0.00401692	1.02627	1.04484e-07	1.34161	2.72199e-15	0.284358	0.235783	nucleobindin 2 [Source:HGNC Symbol;Acc:HGNC:8044]
PFN2	ENSG00000070087	7.11614	0.470542	0.00021997	0.188445	0.36002	0.75264	2.92353e-05	-0.914207	8.00807e-13	-1.1963	1.5445e-11	-0.632109	0.000573449	-1.38475	5.29673e-19	-0.443664	0.0342115	profilin 2 [Source:HGNC Symbol;Acc:HGNC:8882]
PTPN3	ENSG00000070159	5.29591	-0.297624	0.00173804	-0.266885	0.0611488	-0.328363	0.0197688	-0.0662905	0.508135	-0.0355516	0.828588	-0.0970293	0.510302	0.231334	0.0353379	-0.363915	0.0192826	protein tyrosine phosphatase non-receptor type 3 [Source:HGNC Symbol;Acc:HGNC:9655]
SPTB	ENSG00000070182	1.42828	-0.0174259	0.935263	0.162512	0.594868	-0.197363	0.497513	-1.11389	6.74186e-10	-0.933949	0.000208549	-1.29382	1.33398e-06	-1.09646	1.85392e-07	-1.13131	0.000126235	spectrin beta, erythrocytic [Source:HGNC Symbol;Acc:HGNC:11274]
DAPP1	ENSG00000070190	4.22462	-0.269532	0.0948221	0.129938	0.626346	-0.669003	0.00423535	-1.00726	1.27221e-10	-0.607792	0.00642472	-1.40673	2.04831e-09	-0.73773	4.4725e-05	-1.27679	6.97084e-07	dual adaptor of phosphotyrosine and 3-phosphoinositides 1 [Source:HGNC Symbol;Acc:HGNC:16500]
FGF10	ENSG00000070193	3.91623	-1.14332	0.00112647	-1.4092	0.00489864	-0.877445	0.0999174	4.59001	1.59132e-25	4.32413	4.12995e-12	4.85589	2.37349e-20	5.73333	1.69093e-27	3.44669	2.49405e-08	fibroblast growth factor 10 [Source:HGNC Symbol;Acc:HGNC:3666]
SLC44A1	ENSG00000070214	7.50972	-0.276951	0.000865607	-0.207624	0.100415	-0.346278	0.00466757	0.524842	1.90456e-10	0.594169	9.24285e-07	0.455516	7.69515e-05	0.801793	6.83659e-16	0.247891	0.0726524	solute carrier family 44 member 1 [Source:HGNC Symbol;Acc:HGNC:18798]
TMEM260	ENSG00000070269	4.54696	-0.285739	1.11223e-05	-0.337897	0.000355623	-0.233581	0.0150858	0.212629	0.000881748	0.160471	0.102085	0.264788	0.00382028	0.498369	5.65307e-11	-0.0731099	0.527787	transmembrane protein 260 [Source:HGNC Symbol;Acc:HGNC:20185]
SMG6	ENSG00000070366	4.70774	-0.450018	5.80945e-06	-0.471183	0.00106135	-0.428852	0.00340137	0.239135	0.0150115	0.217969	0.150166	0.2603	0.0679552	0.689152	2.47861e-09	-0.210883	0.209902	SMG6 nonsense mediated mRNA decay factor [Source:HGNC Symbol;Acc:HGNC:17809]
EXOC5	ENSG00000070367	6.1749	-0.445148	1.48714e-08	-0.540813	1.55726e-06	-0.349483	0.00232293	-0.119143	0.131104	-0.214808	0.0617172	-0.0234783	0.856214	0.326005	0.00028012	-0.564292	8.10695e-06	exocyst complex component 5 [Source:HGNC Symbol;Acc:HGNC:10696]
CLTCL1	ENSG00000070371	2.22269	0.0807617	0.589287	-0.31335	0.128349	0.474874	0.0150914	-0.572838	1.61725e-05	-0.96695	2.63614e-07	-0.178726	0.387468	-0.6536	2.78717e-05	-0.492076	0.0269762	clathrin heavy chain like 1 [Source:HGNC Symbol;Acc:HGNC:2093]
FGF22	ENSG00000070388	-2.72452	0.751761	0.000366167	0.45714	0.172865	1.04638	0.000325713	0.853611	3.69068e-05	0.558989	0.0818511	1.14823	5.44571e-05	0.101849	0.693723	1.60537	3.22953e-06	fibroblast growth factor 22 [Source:HGNC Symbol;Acc:HGNC:3679]
FSTL3	ENSG00000070404	4.56059	0.146875	0.374711	-0.0151644	0.959152	0.308915	0.182732	0.640525	2.47379e-05	0.478485	0.0386764	0.802565	0.000158846	0.493649	0.00555653	0.7874	0.0017786	follistatin like 3 [Source:HGNC Symbol;Acc:HGNC:3973]
DGCR2	ENSG00000070413	7.15489	0.280641	0.000202858	0.149123	0.209752	0.41216	0.000131075	0.0884194	0.253612	-0.0430987	0.736872	0.219938	0.041916	-0.192222	0.0279136	0.369061	0.00266785	DiGeorge syndrome critical region gene 2 [Source:HGNC Symbol;Acc:HGNC:2845]
RNF126	ENSG00000070423	4.92597	0.774497	3.98639e-14	0.719602	1.41283e-06	0.829392	4.58121e-09	-0.101322	0.321064	-0.156217	0.307807	-0.0464265	0.772187	-0.875819	8.27095e-14	0.673175	2.80501e-05	ring finger protein 126 [Source:HGNC Symbol;Acc:HGNC:21151]
MNT	ENSG00000070444	4.70354	0.175328	0.00243769	0.239794	0.00537579	0.110863	0.205353	0.0555325	0.352582	0.119998	0.173344	-0.00893324	0.926468	-0.119796	0.0745706	0.230861	0.0144483	MAX network transcriptional repressor [Source:HGNC Symbol;Acc:HGNC:7188]
ZXDC	ENSG00000070476	5.15511	0.173688	0.00270528	0.220932	0.0107189	0.126443	0.144629	0.0416491	0.493806	0.0888935	0.325003	-0.00559535	0.954505	-0.132039	0.0487214	0.215337	0.0229932	ZXD family zinc finger C [Source:HGNC Symbol;Acc:HGNC:28160]
JMJD6	ENSG00000070495	4.80966	0.599131	6.81021e-15	0.501706	6.15196e-06	0.696557	8.30523e-11	-0.470434	1.61782e-10	-0.567859	4.99882e-08	-0.373008	0.000436981	-1.06956	9.58517e-30	0.128698	0.314591	jumonji domain containing 6, arginine demethylase and lysine hydroxylase [Source:HGNC Symbol;Acc:HGNC:19355]
POLB	ENSG00000070501	5.46191	0.321433	0.014732	0.488189	0.0135838	0.154676	0.451237	0.123515	0.360528	0.290271	0.145097	-0.0432415	0.840071	-0.197918	0.197624	0.444947	0.0386665	DNA polymerase beta [Source:HGNC Symbol;Acc:HGNC:9174]
ST6GALNAC1	ENSG00000070526	1.39151	-0.516036	0.105729	-1.53657	0.000469599	0.504502	0.281693	-0.4647	0.137224	-1.48524	0.000528266	0.555838	0.218495	0.0513369	0.895671	-0.980736	0.0565089	ST6 N-acetylgalactosaminide alpha-2,6-sialyltransferase 1 [Source:HGNC Symbol;Acc:HGNC:23614]
WIPI1	ENSG00000070540	5.39558	0.011558	0.932928	-0.120779	0.524565	0.143895	0.424929	0.154916	0.185207	0.0225792	0.912008	0.287254	0.0824804	0.143359	0.293478	0.166474	0.406476	WD repeat domain, phosphoinositide interacting 1 [Source:HGNC Symbol;Acc:HGNC:25471]
FRMPD1	ENSG00000070601	-0.0461709	-0.0180947	0.944334	0.0787928	0.839995	-0.114982	0.753205	-0.225906	0.310384	-0.129019	0.723258	-0.322794	0.328237	-0.207812	0.423297	-0.244001	0.525553	FERM and PDZ domain containing 1 [Source:HGNC Symbol;Acc:HGNC:29159]
GBA2	ENSG00000070610	5.7119	0.184613	0.00657845	0.231725	0.0230518	0.137501	0.177116	0.00714971	0.92623	0.0542617	0.627745	-0.0399623	0.712091	-0.177463	0.0229248	0.191763	0.0880726	glucosylceramidase beta 2 [Source:HGNC Symbol;Acc:HGNC:18986]
NDST1	ENSG00000070614	7.40399	-0.325589	7.32143e-05	-0.411336	0.000563077	-0.239843	0.0510297	0.139246	0.0921222	0.0534992	0.699529	0.224992	0.056456	0.464835	9.56685e-07	-0.186344	0.179143	N-deacetylase and N-sulfotransferase 1 [Source:HGNC Symbol;Acc:HGNC:7680]
ASNS	ENSG00000070669	5.69328	0.548676	1.78272e-06	0.466357	0.00698394	0.630996	0.000103101	-1.24265	1.1525e-24	-1.32497	2.81271e-16	-1.16033	9.76707e-12	-1.79133	8.60836e-33	-0.693978	0.00018912	asparagine synthetase (glutamine-hydrolyzing) [Source:HGNC Symbol;Acc:HGNC:753]
AP3M2	ENSG00000070718	5.1906	0.299863	0.00864841	0.115669	0.541786	0.484058	0.00281596	0.207556	0.0675398	0.0233613	0.907667	0.391751	0.0141617	-0.0923074	0.500448	0.507419	0.0060595	adaptor related protein complex 3 subunit mu 2 [Source:HGNC Symbol;Acc:HGNC:570]
CNGB1	ENSG00000070729	-1.25296	1.07348	8.71852e-05	0.301142	0.496826	1.84582	3.13127e-06	-2.91427	6.5587e-22	-3.68661	5.64133e-20	-2.14193	2.73882e-07	-3.98775	6.62611e-26	-1.84079	3.92046e-05	cyclic nucleotide gated channel subunit beta 1 [Source:HGNC Symbol;Acc:HGNC:2151]
ST6GALNAC2	ENSG00000070731	5.82312	0.00122413	0.995292	-0.161457	0.56802	0.163906	0.547291	1.27599	1.50315e-13	1.11331	1.12053e-05	1.43867	6.13786e-10	1.27476	2.04375e-10	1.27721	4.61854e-06	ST6 N-acetylgalactosaminide alpha-2,6-sialyltransferase 2 [Source:HGNC Symbol;Acc:HGNC:10867]
PABPC1	ENSG00000070756	11.0818	0.526094	3.90133e-07	0.378662	0.0153199	0.673527	4.39122e-06	-0.840027	9.33948e-16	-0.98746	8.54047e-12	-0.692594	3.24612e-06	-1.36612	6.952e-26	-0.313933	0.0669207	poly(A) binding protein cytoplasmic 1 [Source:HGNC Symbol;Acc:HGNC:8554]
TESK2	ENSG00000070759	3.74077	0.108725	0.42049	-0.0632765	0.772816	0.280727	0.131996	0.648985	1.42908e-07	0.476983	0.0099524	0.820986	1.73712e-06	0.540259	0.00017453	0.75771	0.000194909	testis associated actin remodelling kinase 2 [Source:HGNC Symbol;Acc:HGNC:11732]
CFAP20	ENSG00000070761	4.91621	0.348345	8.15185e-07	0.261628	0.013685	0.435062	1.55873e-05	-0.659192	7.58338e-20	-0.745909	7.89199e-14	-0.572474	1.62235e-08	-1.00754	1.8486e-29	-0.310847	0.00683484	cilia and flagella associated protein 20 [Source:HGNC Symbol;Acc:HGNC:29523]
CSNK2A2	ENSG00000070770	6.18007	0.045729	0.494676	-0.0458648	0.661613	0.137323	0.134876	-0.650625	2.49916e-24	-0.742219	2.74365e-17	-0.559032	2.53029e-10	-0.696354	9.06734e-21	-0.604896	1.62862e-09	casein kinase 2 alpha 2 [Source:HGNC Symbol;Acc:HGNC:2459]
PTPN21	ENSG00000070778	4.23753	-0.537037	1.7552e-06	-0.436523	0.00786672	-0.637551	0.000122992	-0.121888	0.290593	-0.0213745	0.91469	-0.222402	0.183354	0.415149	0.00129569	-0.658926	0.000294656	protein tyrosine phosphatase non-receptor type 21 [Source:HGNC Symbol;Acc:HGNC:9651]
EIF2B3	ENSG00000070785	5.03159	0.341235	1.48184e-07	0.365268	0.000149002	0.317202	0.000622416	-0.433227	1.57358e-11	-0.409194	6.93284e-06	-0.45726	7.44259e-07	-0.774462	1.65982e-22	-0.091992	0.416243	eukaryotic translation initiation factor 2B subunit gamma [Source:HGNC Symbol;Acc:HGNC:3259]
CAMK2A	ENSG00000070808	-0.361363	0.0879638	0.697133	-0.246697	0.448722	0.422624	0.159678	-0.296156	0.146111	-0.630816	0.0294971	0.0385051	0.908856	-0.384119	0.102849	-0.208192	0.562769	calcium/calmodulin dependent protein kinase II alpha [Source:HGNC Symbol;Acc:HGNC:1460]
TCOF1	ENSG00000070814	6.27514	0.44529	1.44396e-09	0.483482	8.63021e-06	0.407097	8.90032e-05	-0.728443	4.47775e-22	-0.690251	1.65408e-11	-0.766635	6.84239e-13	-1.17373	4.21824e-35	-0.283153	0.017634	treacle ribosome biogenesis factor 1 [Source:HGNC Symbol;Acc:HGNC:11654]
CDC42	ENSG00000070831	8.12978	-0.123251	0.0384005	-0.246008	0.00415003	-0.000495009	0.996412	0.156065	0.00686125	0.0333084	0.737953	0.278821	0.000647472	0.279316	3.2617e-05	0.0328134	0.76252	cell division cycle 42 [Source:HGNC Symbol;Acc:HGNC:1736]
OSBPL3	ENSG00000070882	4.70975	-0.087843	0.481459	0.0570778	0.776974	-0.232764	0.184277	-1.0756	9.70831e-20	-0.930683	5.35335e-09	-1.22052	1.06793e-12	-0.987761	3.35204e-13	-1.16345	7.87777e-10	oxysterol binding protein like 3 [Source:HGNC Symbol;Acc:HGNC:16370]
EPHA8	ENSG00000070886	0.350213	1.13891	0.00144344	1.73287	0.00198356	0.544941	0.309046	-0.226502	0.545395	0.367462	0.525439	-0.820467	0.121688	-1.36541	0.000853391	0.912403	0.12484	EPH receptor A8 [Source:HGNC Symbol;Acc:HGNC:3391]
SLC12A3	ENSG00000070915	-1.0535	-0.548146	0.0197711	-0.629981	0.066291	-0.466311	0.195781	-0.824921	0.000308717	-0.906756	0.00538125	-0.743086	0.0305927	-0.276775	0.314683	-1.37307	0.000312588	solute carrier family 12 member 3 [Source:HGNC Symbol;Acc:HGNC:10912]
RAD18	ENSG00000070950	4.79962	-0.169816	0.0367074	-0.277796	0.0189169	-0.0618365	0.63962	-0.430736	4.25587e-08	-0.538716	1.46976e-06	-0.322757	0.00490132	-0.26092	0.00454671	-0.600553	3.53165e-06	RAD18 E3 ubiquitin protein ligase [Source:HGNC Symbol;Acc:HGNC:18278]
ATP2B1	ENSG00000070961	5.86109	-0.47743	6.91958e-06	-0.897529	3.94103e-09	-0.0573307	0.74902	0.108194	0.323233	-0.311905	0.0441228	0.528293	0.000329597	0.585624	1.75583e-06	-0.369236	0.0346313	ATPase plasma membrane Ca2+ transporting 1 [Source:HGNC Symbol;Acc:HGNC:814]
TRPM5	ENSG00000070985	-1.69055	2.27931	1.46949e-11	2.31558	5.98393e-06	2.24305	4.76126e-07	-0.427166	0.185087	-0.390903	0.441742	-0.463428	0.329649	-2.70648	3.77555e-12	1.85215	0.00042419	transient receptor potential cation channel subfamily M member 5 [Source:HGNC Symbol;Acc:HGNC:14323]
NCK2	ENSG00000071051	5.95974	0.322888	1.77902e-05	0.346603	0.00205136	0.299173	0.00587077	-1.08865	3.18296e-38	-1.06494	2.03108e-22	-1.11237	7.60448e-22	-1.41154	4.07543e-43	-0.765766	5.89871e-10	NCK adaptor protein 2 [Source:HGNC Symbol;Acc:HGNC:7665]
MAP4K4	ENSG00000071054	7.30731	-0.281557	0.000809583	-0.246825	0.0498721	-0.31629	0.0108485	-1.02948	5.19448e-30	-0.994747	8.70964e-17	-1.06421	4.46544e-17	-0.747922	5.55046e-14	-1.31104	1.06405e-19	mitogen-activated protein kinase kinase kinase kinase 4 [Source:HGNC Symbol;Acc:HGNC:6866]
MGAT4A	ENSG00000071073	6.55972	-0.571834	7.05476e-05	-0.981133	1.76268e-06	-0.162535	0.480245	0.417099	0.00325472	0.0078002	0.976246	0.826398	2.84904e-05	0.988933	4.02579e-09	-0.154735	0.545913	alpha-1,3-mannosyl-glycoprotein 4-beta-N-acetylglucosaminyltransferase A [Source:HGNC Symbol;Acc:HGNC:7047]
RPL31	ENSG00000071082	9.44507	0.2712	0.00829219	0.296042	0.0576033	0.246358	0.103847	-0.110761	0.290625	-0.0859192	0.608075	-0.135603	0.383179	-0.381961	0.00111624	0.160439	0.364057	ribosomal protein L31 [Source:HGNC Symbol;Acc:HGNC:10334]
WDR1	ENSG00000071127	8.36685	0.0844266	0.214517	0.0800893	0.451601	0.0887638	0.381899	-0.0223007	0.754251	-0.0266379	0.812521	-0.0179634	0.868102	-0.106727	0.162	0.0621259	0.595995	WD repeat domain 1 [Source:HGNC Symbol;Acc:HGNC:12754]
SNX13	ENSG00000071189	5.67569	-0.430982	2.78314e-06	-0.5316	6.21481e-05	-0.330365	0.0153039	0.393242	1.2946e-05	0.292624	0.0320807	0.493859	0.000105645	0.824224	4.22709e-14	-0.0377408	0.828014	sorting nexin 13 [Source:HGNC Symbol;Acc:HGNC:21335]
ARHGAP10	ENSG00000071205	4.09823	0.0245634	0.850648	-0.15186	0.399102	0.200987	0.236456	-0.486704	8.81319e-06	-0.663128	2.14481e-05	-0.310281	0.0571928	-0.511268	6.87298e-05	-0.462141	0.0113162	Rho GTPase activating protein 10 [Source:HGNC Symbol;Acc:HGNC:26099]
RPS6KA2	ENSG00000071242	5.31995	-0.39297	0.000283591	-0.512041	0.00109751	-0.273899	0.0937792	0.0607157	0.600652	-0.0583555	0.751717	0.179787	0.264529	0.453686	0.000269011	-0.332254	0.0642565	ribosomal protein S6 kinase A2 [Source:HGNC Symbol;Acc:HGNC:10431]
ING3	ENSG00000071243	3.4995	-0.228362	0.00208711	-0.0808711	0.507596	-0.375853	0.000535315	-0.293637	5.17565e-05	-0.146146	0.193879	-0.441127	2.98322e-05	-0.0652746	0.464593	-0.521999	1.33142e-05	inhibitor of growth family member 3 [Source:HGNC Symbol;Acc:HGNC:14587]
VASH1	ENSG00000071246	4.76468	-0.330646	0.00133664	-0.168071	0.302116	-0.493221	0.00115933	0.0240151	0.834853	0.18659	0.24183	-0.13856	0.377549	0.354661	0.00275872	-0.306631	0.0729551	vasohibin 1 [Source:HGNC Symbol;Acc:HGNC:19964]
LMCD1	ENSG00000071282	5.92337	-0.18916	0.151721	-0.159634	0.438893	-0.218685	0.266638	0.484763	0.000103905	0.514288	0.00619441	0.455237	0.0108265	0.673922	4.4183e-06	0.295603	0.168053	LIM and cysteine rich domains 1 [Source:HGNC Symbol;Acc:HGNC:6633]
BUD23	ENSG00000071462	6.70692	0.367683	1.2966e-05	0.214815	0.098569	0.520552	1.4709e-05	-0.462968	2.46005e-08	-0.615836	1.77445e-07	-0.310099	0.0106764	-0.830651	1.88284e-16	-0.0952845	0.52508	BUD23 rRNA methyltransferase and ribosome maturation factor [Source:HGNC Symbol;Acc:HGNC:16405]
SEL1L	ENSG00000071537	7.49135	-0.651467	1.50875e-11	-0.678676	6.16808e-07	-0.624257	8.7116e-06	0.581658	5.69241e-10	0.554448	5.93096e-05	0.608868	3.13229e-06	1.23312	2.53035e-25	-0.0698088	0.686866	SEL1L adaptor subunit of ERAD E3 ubiquitin ligase [Source:HGNC Symbol;Acc:HGNC:10717]
TRIP13	ENSG00000071539	4.91896	0.727394	2.45779e-08	0.48423	0.0134101	0.970559	1.16355e-07	-1.36307	1.64209e-23	-1.60624	2.16896e-18	-1.11991	4.01608e-09	-2.09047	4.91221e-34	-0.635679	0.00247725	thyroid hormone receptor interactor 13 [Source:HGNC Symbol;Acc:HGNC:12307]
ATP6AP1	ENSG00000071553	8.22894	0.392364	1.6717e-05	0.11476	0.442233	0.669969	2.46666e-07	0.454704	3.87748e-07	0.177099	0.207119	0.732308	5.82849e-09	0.0623392	0.574294	0.847068	1.44545e-08	ATPase H+ transporting accessory protein 1 [Source:HGNC Symbol;Acc:HGNC:868]
TCF3	ENSG00000071564	6.7044	0.439537	4.645e-07	0.501598	0.000115036	0.377477	0.00246667	-0.550859	1.62175e-10	-0.488799	6.36282e-05	-0.612919	9.19945e-07	-0.990396	1.05468e-20	-0.111322	0.467059	transcription factor 3 [Source:HGNC Symbol;Acc:HGNC:11633]
TRIB2	ENSG00000071575	6.14946	-0.165835	0.213998	-0.168959	0.41214	-0.162712	0.420726	-0.843602	3.29838e-11	-0.846725	1.78706e-06	-0.840478	5.49988e-06	-0.677766	4.09617e-06	-1.00944	1.21293e-06	tribbles pseudokinase 2 [Source:HGNC Symbol;Acc:HGNC:30809]
DAZAP1	ENSG00000071626	6.82013	0.492855	6.10295e-16	0.565347	1.69869e-10	0.420364	5.62556e-07	-0.313727	5.2452e-08	-0.241235	0.0041487	-0.386219	3.70309e-06	-0.806582	6.1002e-28	0.179128	0.0656091	DAZ associated protein 1 [Source:HGNC Symbol;Acc:HGNC:2683]
MBD3	ENSG00000071655	6.03966	0.851656	1.88462e-14	0.881307	6.47518e-08	0.822004	7.08593e-08	0.00392201	0.975155	0.0335739	0.857673	-0.0257299	0.886275	-0.847734	1.64599e-11	0.855578	9.75529e-07	methyl-CpG binding domain protein 3 [Source:HGNC Symbol;Acc:HGNC:6918]
HLTF	ENSG00000071794	6.23534	-0.22327	0.0284926	-0.409357	0.00525413	-0.0371826	0.829371	-0.0968695	0.351112	-0.282957	0.0545012	0.0892176	0.569007	0.1264	0.289032	-0.320139	0.0538486	helicase like transcription factor [Source:HGNC Symbol;Acc:HGNC:11099]
FAM50A	ENSG00000071859	6.35021	0.703774	7.6728e-10	0.702053	3.60993e-05	0.705495	1.02952e-05	-0.0903874	0.443477	-0.0921085	0.61976	-0.0886663	0.619115	-0.794162	1.51653e-09	0.613387	0.000819335	family with sequence similarity 50 member A [Source:HGNC Symbol;Acc:HGNC:18786]
FAM3A	ENSG00000071889	5.48803	0.768446	6.49555e-15	0.699291	1.01627e-06	0.837601	7.56504e-10	-0.293408	0.00167441	-0.362562	0.00776155	-0.224253	0.108654	-1.06185	4.60401e-20	0.475038	0.00210141	FAM3 metabolism regulating signaling molecule A [Source:HGNC Symbol;Acc:HGNC:13749]
CPSF1	ENSG00000071894	6.99791	1.40714	1.9383e-50	1.34964	6.45624e-26	1.46463	1.20833e-34	-0.00378286	0.967445	-0.0612822	0.635448	0.0537165	0.6647	-1.41092	6.65214e-41	1.40335	2.35014e-24	cleavage and polyadenylation specific factor 1 [Source:HGNC Symbol;Acc:HGNC:2324]
MYO3B	ENSG00000071909	2.55085	-1.87652	2.07884e-08	-0.211693	0.698606	-3.54135	3.44983e-10	-0.393813	0.228995	1.27101	0.00960442	-2.05864	3.26957e-05	1.48271	7.56638e-05	-2.27033	2.73836e-05	myosin IIIB [Source:HGNC Symbol;Acc:HGNC:15576]
CYBRD1	ENSG00000071967	8.01315	-1.2389	2.56851e-17	-1.10349	2.2225e-08	-1.37432	1.76485e-10	1.40325	5.67596e-22	1.53867	5.52885e-13	1.26784	2.56261e-11	2.64216	8.98038e-42	0.164351	0.501582	cytochrome b reductase 1 [Source:HGNC Symbol;Acc:HGNC:20797]
CDH19	ENSG00000071991	2.87642	-0.519752	0.270462	-1.71052	0.00623901	0.671013	0.329548	-5.28923	1.09956e-20	-6.47999	7.55016e-20	-4.09847	8.06767e-08	-4.76948	3.5114e-15	-5.80898	4.05237e-11	cadherin 19 [Source:HGNC Symbol;Acc:HGNC:1758]
PDCD2	ENSG00000071994	5.78991	0.0396252	0.63834	0.052912	0.68423	0.0263384	0.839567	-0.226188	0.0023841	-0.212901	0.055667	-0.239475	0.0287896	-0.265813	0.00225581	-0.186563	0.141957	programmed cell death 2 [Source:HGNC Symbol;Acc:HGNC:8762]
SLC6A15	ENSG00000072041	2.76261	1.69464	1.73601e-05	2.11227	0.000588817	1.27701	0.0206545	-4.40477	3.83112e-21	-3.98714	5.67273e-13	-4.8224	3.59884e-12	-6.09941	1.47378e-25	-2.71013	3.29416e-05	solute carrier family 6 member 15 [Source:HGNC Symbol;Acc:HGNC:13621]
RDH11	ENSG00000072042	6.36862	-0.107152	0.23528	-0.343541	0.0064758	0.129236	0.331755	-0.0386311	0.678984	-0.275019	0.0278468	0.197757	0.113564	0.0685211	0.510736	-0.145783	0.325801	retinol dehydrogenase 11 [Source:HGNC Symbol;Acc:HGNC:17964]
PRKACA	ENSG00000072062	6.91936	0.175028	0.0248676	0.0548695	0.677984	0.295186	0.00788678	-0.0425039	0.60634	-0.162662	0.161385	0.0776545	0.513534	-0.217532	0.0142388	0.132524	0.317468	protein kinase cAMP-activated catalytic subunit alpha [Source:HGNC Symbol;Acc:HGNC:9380]
ADGRL1	ENSG00000072071	6.22615	0.575296	9.11937e-07	0.604165	0.000579279	0.546427	0.00101185	0.17584	0.136423	0.204708	0.259076	0.146971	0.405782	-0.399456	0.00294008	0.751136	7.55521e-05	adhesion G protein-coupled receptor L1 [Source:HGNC Symbol;Acc:HGNC:20973]
ACTN1	ENSG00000072110	8.52174	0.0391964	0.730913	0.145902	0.370447	-0.0675097	0.688025	-0.594524	2.18764e-09	-0.487818	0.000596747	-0.70123	1.30795e-06	-0.633721	5.2963e-08	-0.555328	0.000663225	actinin alpha 1 [Source:HGNC Symbol;Acc:HGNC:163]
ZFYVE26	ENSG00000072121	5.49699	-0.462257	2.85368e-09	-0.465607	2.97913e-05	-0.458906	5.09863e-05	0.251879	0.000886402	0.248528	0.0296029	0.255229	0.0197236	0.714135	6.649e-15	-0.210378	0.102202	zinc finger FYVE-type containing 26 [Source:HGNC Symbol;Acc:HGNC:20761]
RPS6KA6	ENSG00000072133	3.18348	-0.32512	0.103969	-0.304652	0.319856	-0.345588	0.250694	0.503292	0.00876654	0.52376	0.0751036	0.482824	0.0820432	0.828412	0.000216424	0.178171	0.61119	ribosomal protein S6 kinase A6 [Source:HGNC Symbol;Acc:HGNC:10435]
EPN2	ENSG00000072134	5.26196	0.158268	0.0925374	-0.00962377	0.956113	0.326159	0.0138002	0.359453	6.14671e-05	0.191561	0.171255	0.527344	3.0356e-05	0.201185	0.0583912	0.517721	0.000487071	epsin 2 [Source:HGNC Symbol;Acc:HGNC:18639]
PTPN18	ENSG00000072135	6.55205	0.145862	0.0360874	0.338563	0.000889032	-0.0468391	0.681867	0.283301	2.37902e-05	0.476002	1.58681e-06	0.0906001	0.381798	0.137439	0.0849142	0.429163	0.000108041	protein tyrosine phosphatase non-receptor type 18 [Source:HGNC Symbol;Acc:HGNC:9649]
LIMS2	ENSG00000072163	4.26851	0.0946102	0.519279	0.3145	0.131589	-0.12528	0.565288	-0.0366974	0.804713	0.183192	0.389509	-0.256587	0.199963	-0.131308	0.414255	0.0579128	0.81897	LIM zinc finger domain containing 2 [Source:HGNC Symbol;Acc:HGNC:16084]
ASIC4	ENSG00000072182	-1.82506	0.718776	0.00202079	0.582292	0.106535	0.855259	0.00994446	-0.393876	0.0901768	-0.53036	0.124195	-0.257393	0.471133	-1.11265	3.45333e-05	0.3249	0.421696	acid sensing ion channel subunit family member 4 [Source:HGNC Symbol;Acc:HGNC:21263]
SPEG	ENSG00000072195	4.57943	0.797133	9.86569e-07	0.90597	0.000233738	0.688295	0.00279464	-1.18963	3.48082e-13	-1.08079	1.38856e-06	-1.29846	6.21831e-08	-1.98676	2.02783e-22	-0.392495	0.148764	striated muscle enriched protein kinase [Source:HGNC Symbol;Acc:HGNC:16901]
LNX1	ENSG00000072201	4.22282	-0.503038	5.7283e-05	-0.824511	4.13979e-06	-0.181564	0.354855	0.165014	0.195036	-0.156459	0.428693	0.486487	0.00542137	0.668052	3.69959e-06	-0.338024	0.105362	ligand of numb-protein X 1 [Source:HGNC Symbol;Acc:HGNC:6657]
ALDH3A2	ENSG00000072210	6.45243	-0.0557311	0.676442	-0.136712	0.483094	0.0252502	0.902999	0.739749	4.25372e-10	0.658768	0.000165861	0.82073	5.35367e-07	0.79548	9.92549e-09	0.684018	0.000417434	aldehyde dehydrogenase 3 family member A2 [Source:HGNC Symbol;Acc:HGNC:403]
TFRC	ENSG00000072274	7.67904	0.0462968	0.784017	-0.177729	0.458677	0.270323	0.22661	-0.827114	1.50888e-08	-1.05114	2.77053e-07	-0.603088	0.00487897	-0.873411	3.36605e-07	-0.780818	0.00115247	transferrin receptor [Source:HGNC Symbol;Acc:HGNC:11763]
SREBF1	ENSG00000072310	8.24416	-0.201234	0.217812	-0.362667	0.126072	-0.0398013	0.883248	0.93643	1.66721e-09	0.774998	0.00079356	1.09786	2.63961e-07	1.13766	5.5174e-10	0.735196	0.00391603	sterol regulatory element binding transcription factor 1 [Source:HGNC Symbol;Acc:HGNC:11289]
AFF4	ENSG00000072364	7.30349	-0.746993	1.27088e-15	-0.92966	9.25725e-13	-0.564325	2.08399e-05	0.659327	2.36529e-13	0.47666	0.00027148	0.841995	1.32453e-11	1.40632	2.5584e-33	-0.0876653	0.587139	AF4/FMR2 family member 4 [Source:HGNC Symbol;Acc:HGNC:17869]
UBE2D1	ENSG00000072401	4.59789	-0.0676371	0.446639	0.00401493	0.981219	-0.139289	0.272044	-0.637329	1.06627e-14	-0.565677	8.21483e-07	-0.708981	2.35894e-09	-0.569692	2.2611e-09	-0.704966	1.30229e-07	ubiquitin conjugating enzyme E2 D1 [Source:HGNC Symbol;Acc:HGNC:12474]
MPP5	ENSG00000072415	5.3708	-0.479233	2.93574e-07	-0.467354	0.00053636	-0.491112	0.00034024	0.21472	0.0202025	0.226599	0.108094	0.202841	0.135639	0.693953	1.88401e-10	-0.264513	0.0882539	membrane palmitoylated protein 5 [Source:HGNC Symbol;Acc:HGNC:18669]
RHOBTB1	ENSG00000072422	4.64022	-0.215497	0.0267823	-0.203485	0.168558	-0.22751	0.11688	0.076369	0.446766	0.0883811	0.575178	0.0643569	0.672221	0.291867	0.00825613	-0.139128	0.405645	Rho related BTB domain containing 1 [Source:HGNC Symbol;Acc:HGNC:18738]
SMC1A	ENSG00000072501	7.35514	-0.108936	0.211747	-0.325311	0.00789716	0.107439	0.411481	-0.389886	1.84467e-06	-0.606261	1.99014e-07	-0.173511	0.160251	-0.28095	0.00339332	-0.498822	0.00022051	structural maintenance of chromosomes 1A [Source:HGNC Symbol;Acc:HGNC:11111]
HSD17B10	ENSG00000072506	6.61172	0.537417	7.81853e-07	0.484617	0.00294617	0.590218	0.000125796	-0.479876	6.39244e-06	-0.532677	0.000497233	-0.427075	0.00631643	-1.01729	3.9226e-15	0.0575414	0.775672	hydroxysteroid 17-beta dehydrogenase 10 [Source:HGNC Symbol;Acc:HGNC:4800]
MARK2	ENSG00000072518	6.65454	0.420754	9.54387e-08	0.306121	0.00950945	0.535387	1.7505e-06	-0.221558	0.00418439	-0.336191	0.00270723	-0.106925	0.371062	-0.642312	3.31267e-12	0.199196	0.130359	microtubule affinity regulating kinase 2 [Source:HGNC Symbol;Acc:HGNC:3332]
HMMR	ENSG00000072571	4.2508	0.280375	0.0316474	0.0584576	0.796706	0.502292	0.00638491	-0.958309	1.24143e-13	-1.18023	4.16468e-11	-0.736391	7.19731e-05	-1.23868	1.009e-15	-0.677934	0.00115472	hyaluronan mediated motility receptor [Source:HGNC Symbol;Acc:HGNC:5012]
CHFR	ENSG00000072609	4.91131	0.0311339	0.673146	-0.0389076	0.733712	0.101175	0.320587	-0.352143	5.37053e-08	-0.422185	5.09327e-06	-0.282102	0.00275051	-0.383277	4.54373e-07	-0.321009	0.00269695	checkpoint with forkhead and ring finger domains [Source:HGNC Symbol;Acc:HGNC:20455]
TRHDE	ENSG00000072657	-0.939749	-1.35301	9.98897e-06	-0.723936	0.108182	-1.98209	3.10279e-05	-0.253032	0.417852	0.376044	0.434561	-0.882107	0.0514277	1.09998	0.00157517	-1.60604	0.00128772	thyrotropin releasing hormone degrading enzyme [Source:HGNC Symbol;Acc:HGNC:30748]
P4HA2	ENSG00000072682	6.01048	0.144823	0.19621	-0.0392717	0.838668	0.328919	0.0356979	-0.538754	3.21823e-07	-0.72285	1.33129e-06	-0.354659	0.0226084	-0.683578	3.86882e-08	-0.393931	0.0252941	prolyl 4-hydroxylase subunit alpha 2 [Source:HGNC Symbol;Acc:HGNC:8547]
FCGR2B	ENSG00000072694	3.24742	-0.088245	0.569658	-0.109357	0.647527	-0.0671326	0.778853	-0.356462	0.0103878	-0.377575	0.0671969	-0.33535	0.106618	-0.268218	0.102614	-0.444707	0.0562814	Fc fragment of IgG receptor IIb [Source:HGNC Symbol;Acc:HGNC:3618]
NFATC3	ENSG00000072736	4.89852	-0.385898	9.51818e-06	-0.455624	0.000307738	-0.316173	0.0143065	-0.3914	4.65079e-06	-0.461125	0.000174855	-0.321674	0.0104301	-0.0055017	0.96038	-0.777298	4.72353e-08	nuclear factor of activated T cells 3 [Source:HGNC Symbol;Acc:HGNC:7777]
TRNT1	ENSG00000072756	4.49097	-0.0674148	0.440291	-0.0885297	0.505312	-0.0462998	0.733168	-0.18045	0.0242967	-0.201565	0.0927469	-0.159335	0.184332	-0.113035	0.236196	-0.247865	0.0639538	tRNA nucleotidyl transferase 1 [Source:HGNC Symbol;Acc:HGNC:17341]
ACADVL	ENSG00000072778	7.6281	0.316378	0.000409494	0.401384	0.00276963	0.231372	0.0808691	0.269802	0.00220725	0.354808	0.00700036	0.184796	0.158776	-0.0465755	0.672606	0.58618	5.44366e-05	acyl-CoA dehydrogenase very long chain [Source:HGNC Symbol;Acc:HGNC:92]
STK10	ENSG00000072786	5.42458	-0.00555927	0.958461	0.021094	0.898995	-0.0322126	0.833449	-0.11101	0.223734	-0.0843568	0.562461	-0.137663	0.308535	-0.105451	0.321478	-0.116569	0.457828	serine/threonine kinase 10 [Source:HGNC Symbol;Acc:HGNC:11388]
FBXW11	ENSG00000072803	5.92113	-0.196545	0.00632274	-0.28804	0.00611421	-0.10505	0.347908	0.282057	5.79393e-05	0.190563	0.0755763	0.373552	0.000173884	0.478602	8.12806e-09	0.0855123	0.499799	F-box and WD repeat domain containing 11 [Source:HGNC Symbol;Acc:HGNC:13607]
ACAP1	ENSG00000072818	3.69447	0.306766	0.0920015	0.359056	0.199382	0.254477	0.352302	-0.107323	0.569176	-0.0550341	0.858121	-0.159613	0.566062	-0.41409	0.0436346	0.199443	0.526147	ArfGAP with coiled-coil, ankyrin repeat and PH domains 1 [Source:HGNC Symbol;Acc:HGNC:16467]
CRMP1	ENSG00000072832	4.01766	0.307863	0.0946282	0.440246	0.114641	0.175481	0.540298	-0.359097	0.0443605	-0.226714	0.421342	-0.49148	0.0620767	-0.66696	0.00121377	-0.0512335	0.881258	collapsin response mediator protein 1 [Source:HGNC Symbol;Acc:HGNC:2365]
EVC	ENSG00000072840	4.7594	-0.861797	5.06137e-11	-0.850288	3.80443e-06	-0.873306	5.78049e-06	0.166641	0.20341	0.17815	0.382048	0.155132	0.426661	1.02844	1.18859e-11	-0.695156	0.000873346	EvC ciliary complex subunit 1 [Source:HGNC Symbol;Acc:HGNC:3497]
DERL2	ENSG00000072849	5.49095	-0.0720475	0.274452	0.0215556	0.848254	-0.16565	0.0766005	-0.00207627	0.977446	0.0915268	0.350632	-0.0956793	0.310444	0.0699712	0.347603	-0.0741237	0.50271	derlin 2 [Source:HGNC Symbol;Acc:HGNC:17943]
SIDT1	ENSG00000072858	5.04428	-1.21659	7.82083e-10	-2.37901	3.24839e-17	-0.0541663	0.871167	1.62555	5.21934e-16	0.463133	0.116695	2.78797	2.20828e-23	2.84214	4.04727e-28	0.408967	0.211716	SID1 transmembrane family member 1 [Source:HGNC Symbol;Acc:HGNC:25967]
NDE1	ENSG00000072864	5.44094	-0.143358	0.112108	-0.369209	0.00384928	0.082493	0.558312	-0.0861294	0.340741	-0.31198	0.0133349	0.139722	0.284787	0.0572285	0.591252	-0.229487	0.116454	nudE neurodevelopment protein 1 [Source:HGNC Symbol;Acc:HGNC:17619]
MRVI1	ENSG00000072952	4.20699	-0.659668	1.23197e-07	-0.805165	5.83461e-06	-0.51417	0.00516147	0.107037	0.407259	-0.0384608	0.8587	0.252535	0.163767	0.766705	9.89756e-08	-0.552631	0.00626603	murine retrovirus integration site 1 homolog [Source:HGNC Symbol;Acc:HGNC:7237]
TMEM38A	ENSG00000072954	3.56003	0.533553	0.000195677	0.49829	0.0222802	0.568816	0.00546505	-1.37747	2.75716e-20	-1.41274	1.47852e-12	-1.34221	3.36696e-10	-1.91103	1.10567e-25	-0.84392	0.00028494	transmembrane protein 38A [Source:HGNC Symbol;Acc:HGNC:28462]
AP1M1	ENSG00000072958	5.80907	0.297465	2.27819e-06	0.231588	0.0143554	0.363341	5.27452e-05	-0.241039	9.26792e-05	-0.306915	0.000598614	-0.175163	0.0555512	-0.538504	3.66404e-13	0.0564258	0.620017	adaptor related protein complex 1 subunit mu 1 [Source:HGNC Symbol;Acc:HGNC:13667]
PVR	ENSG00000073008	5.18882	0.497336	9.17884e-07	0.500738	0.000941621	0.493934	0.000603387	-1.23983	7.59588e-30	-1.23643	8.07498e-18	-1.24323	4.51792e-16	-1.73717	9.60954e-38	-0.742497	5.94e-06	PVR cell adhesion molecule [Source:HGNC Symbol;Acc:HGNC:9705]
XRCC1	ENSG00000073050	5.57267	0.230325	0.00597537	0.261345	0.038928	0.199305	0.107817	0.160332	0.0541983	0.191352	0.130349	0.129312	0.299888	-0.0699931	0.486797	0.390657	0.00396448	X-ray repair cross complementing 1 [Source:HGNC Symbol;Acc:HGNC:12828]
SCARB1	ENSG00000073060	6.69218	0.704371	1.44278e-09	1.03037	5.01463e-09	0.378377	0.0231926	-0.537569	1.85469e-06	-0.211574	0.226208	-0.863563	2.24198e-07	-1.24194	6.51332e-19	0.166802	0.405137	scavenger receptor class B member 1 [Source:HGNC Symbol;Acc:HGNC:1664]
CYP2W1	ENSG00000073067	-1.09829	1.10626	0.00355892	-0.541879	0.355698	2.75441	3.15724e-07	-1.48379	7.33371e-05	-3.13193	3.50672e-09	0.164357	0.784404	-2.59005	2.34357e-08	-0.377523	0.57037	cytochrome P450 family 2 subfamily W member 1 [Source:HGNC Symbol;Acc:HGNC:20243]
MCM2	ENSG00000073111	6.41001	0.566154	4.7864e-07	0.416265	0.0140171	0.716044	6.58331e-06	-1.00669	1.88957e-18	-1.15658	1.83262e-13	-0.856799	1.37236e-07	-1.57284	3.73956e-28	-0.440534	0.0163146	minichromosome maintenance complex component 2 [Source:HGNC Symbol;Acc:HGNC:6944]
MOV10L1	ENSG00000073146	-0.412708	-0.0152489	0.95507	-0.0458086	0.91292	0.0153107	0.969641	-0.293668	0.201129	-0.324228	0.352768	-0.263108	0.450524	-0.278419	0.298326	-0.308917	0.434136	Mov10 like RISC complex RNA helicase 1 [Source:HGNC Symbol;Acc:HGNC:7201]
PANX2	ENSG00000073150	3.07907	1.09034	4.56679e-07	1.1304	0.000568801	1.05028	0.000462384	-0.727814	0.000525454	-0.687754	0.024469	-0.767873	0.0140931	-1.81815	1.46432e-12	0.362527	0.324045	pannexin 2 [Source:HGNC Symbol;Acc:HGNC:8600]
SELENOO	ENSG00000073169	4.41991	0.761231	1.00885e-12	0.681011	1.32184e-05	0.841451	1.36136e-08	0.0224483	0.84732	-0.0577719	0.743383	0.102668	0.522494	-0.738783	1.05505e-09	0.78368	3.54462e-06	selenoprotein O [Source:HGNC Symbol;Acc:HGNC:30395]
TP63	ENSG00000073282	4.05628	-0.250498	0.393335	-0.245628	0.590237	-0.255367	0.567112	0.635219	0.0195422	0.640088	0.12945	0.630349	0.107543	0.885716	0.00513032	0.384721	0.421112	tumor protein p63 [Source:HGNC Symbol;Acc:HGNC:15979]
ALPK1	ENSG00000073331	4.86902	-0.185794	0.0511129	0.0667306	0.677372	-0.438319	0.00142447	-0.137935	0.144383	0.11459	0.443083	-0.39046	0.00360973	0.0478596	0.677193	-0.323729	0.0352146	alpha kinase 1 [Source:HGNC Symbol;Acc:HGNC:20917]
LLGL2	ENSG00000073350	6.71073	0.499078	1.80232e-05	0.104084	0.596714	0.894071	6.37461e-08	0.143337	0.227642	-0.251657	0.149485	0.538331	0.000853461	-0.355741	0.00793018	0.642415	0.000679713	LLGL scribble cell polarity complex component 2 [Source:HGNC Symbol;Acc:HGNC:6629]
PDE8A	ENSG00000073417	4.76812	-0.168094	0.0542466	-0.305246	0.0156756	-0.0309429	0.833099	-0.156071	0.0685553	-0.293223	0.0177874	-0.0189199	0.895371	0.0120229	0.912193	-0.324166	0.0207558	phosphodiesterase 8A [Source:HGNC Symbol;Acc:HGNC:8793]
CLCN4	ENSG00000073464	3.35855	-0.160382	0.329048	0.678196	0.00377222	-0.99896	1.83965e-05	-2.43783	3.44873e-40	-1.59925	1.30765e-13	-3.27641	7.12629e-32	-2.27745	2.61319e-29	-2.59821	8.68633e-21	chloride voltage-gated channel 4 [Source:HGNC Symbol;Acc:HGNC:2022]
NLE1	ENSG00000073536	4.41974	0.435664	2.0282e-07	0.432147	0.000531256	0.439181	0.000223733	-0.14235	0.0899566	-0.145867	0.25506	-0.138833	0.269331	-0.578014	2.60735e-09	0.293314	0.0329563	notchless homolog 1 [Source:HGNC Symbol;Acc:HGNC:19889]
SDHA	ENSG00000073578	6.97938	0.252662	0.00343095	0.189248	0.157875	0.316075	0.011018	-0.344885	4.22964e-05	-0.408298	0.000807105	-0.281471	0.0236415	-0.597547	2.24255e-09	-0.0922229	0.547394	succinate dehydrogenase complex flavoprotein subunit A [Source:HGNC Symbol;Acc:HGNC:10680]
SMARCE1	ENSG00000073584	6.67508	0.00226109	0.982974	-0.031906	0.839949	0.0364282	0.807038	0.379382	1.03435e-05	0.345215	0.00740325	0.413549	0.000709329	0.377121	0.000184008	0.381643	0.0076761	SWI/SNF related, matrix associated, actin dependent regulator of chromatin, subfamily e, member 1 [Source:HGNC Symbol;Acc:HGNC:11109]
GSDMB	ENSG00000073605	4.64371	0.762071	0.00177648	-0.482196	0.19475	2.00634	4.90614e-09	-0.279916	0.258681	-1.52418	4.91757e-06	0.964352	0.00395855	-1.04199	0.0002017	0.482156	0.242756	gasdermin B [Source:HGNC Symbol;Acc:HGNC:23690]
KDM5A	ENSG00000073614	6.59015	-0.428041	2.31184e-06	-0.347582	0.00902236	-0.508499	0.000136603	-0.35261	7.13206e-05	-0.272152	0.0395321	-0.433069	0.000846646	0.0754302	0.490892	-0.780651	1.247e-07	lysine demethylase 5A [Source:HGNC Symbol;Acc:HGNC:9886]
ADAM11	ENSG00000073670	0.354534	0.550066	0.00421046	0.0835483	0.805567	1.01658	0.000157976	-0.738953	8.29224e-05	-1.20547	5.03313e-06	-0.272436	0.349495	-1.28902	8.8079e-09	-0.188887	0.581006	ADAM metallopeptidase domain 11 [Source:HGNC Symbol;Acc:HGNC:189]
PPP2R3A	ENSG00000073711	5.19007	-0.597128	8.7684e-08	-0.355165	0.0310793	-0.839092	4.67362e-07	-0.753903	9.72581e-12	-0.511939	0.00111219	-0.995866	9.83035e-10	-0.156775	0.232054	-1.35103	3.83684e-13	protein phosphatase 2 regulatory subunit B''alpha [Source:HGNC Symbol;Acc:HGNC:9307]
FERMT2	ENSG00000073712	5.67826	-0.59391	2.9678e-08	-0.534652	0.000509163	-0.653168	3.42966e-05	-0.275512	0.00875388	-0.216254	0.178562	-0.33477	0.0303163	0.318398	0.0094417	-0.869422	5.24978e-07	fermitin family member 2 [Source:HGNC Symbol;Acc:HGNC:15767]
ABCB11	ENSG00000073734	-2.41794	-0.599048	0.0474824	-1.33769	0.00179944	0.139596	0.77938	0.593644	0.0449076	-0.145	0.774109	1.33229	0.00119347	1.19269	0.000611947	-0.00540394	0.99285	ATP binding cassette subfamily B member 11 [Source:HGNC Symbol;Acc:HGNC:42]
DHRS9	ENSG00000073737	2.1252	0.984254	0.000212139	-0.855258	0.026581	2.82377	1.14656e-13	1.89648	3.43909e-12	0.0569675	0.902668	3.73599	4.86347e-22	0.912226	0.00279032	2.88073	4.21542e-10	dehydrogenase/reductase 9 [Source:HGNC Symbol;Acc:HGNC:16888]
PTGS2	ENSG00000073756	4.02607	-0.546756	0.0915657	-0.182039	0.737168	-0.911473	0.0603123	-3.1851	3.18571e-19	-2.82038	1.31864e-10	-3.54982	2.7295e-11	-2.63834	1.14577e-11	-3.73185	6.56039e-11	prostaglandin-endoperoxide synthase 2 [Source:HGNC Symbol;Acc:HGNC:9605]
IGF2BP2	ENSG00000073792	3.82457	0.396186	0.0903073	0.710185	0.0430435	0.0821865	0.832725	-3.1809	6.61718e-32	-2.8669	1.45834e-18	-3.4949	6.7159e-19	-3.57708	7.07911e-30	-2.78471	2.55664e-12	insulin like growth factor 2 mRNA binding protein 2 [Source:HGNC Symbol;Acc:HGNC:28867]
MAP3K13	ENSG00000073803	5.64715	-0.033033	0.76353	0.0261385	0.881852	-0.0922046	0.553585	-0.349589	0.000207035	-0.290418	0.0381867	-0.408761	0.00308089	-0.316556	0.00420217	-0.382622	0.0149682	mitogen-activated protein kinase kinase kinase 13 [Source:HGNC Symbol;Acc:HGNC:6852]
ST6GAL1	ENSG00000073849	6.75537	-0.439399	0.00655735	-0.901242	8.78265e-05	0.0224446	0.937248	-0.812032	2.92883e-07	-1.27388	9.8279e-09	-0.350188	0.142331	-0.372633	0.0453638	-1.25143	1.92661e-06	ST6 beta-galactoside alpha-2,6-sialyltransferase 1 [Source:HGNC Symbol;Acc:HGNC:10860]
TBX21	ENSG00000073861	0.691041	0.159713	0.47982	0.252798	0.459221	0.0666272	0.851842	-0.671039	0.0010381	-0.577953	0.055193	-0.764124	0.0121722	-0.830752	0.000516857	-0.511326	0.14273	T-box transcription factor 21 [Source:HGNC Symbol;Acc:HGNC:11599]
VDAC1P1	ENSG00000073905	-2.50898	0.0416627	0.762585	-0.19284	0.317176	0.276165	0.131106	-0.256994	0.0343562	-0.491497	0.00471348	-0.0224916	0.912733	-0.298657	0.0350226	-0.215332	0.304527	voltage dependent anion channel 1 pseudogene 1 [Source:HGNC Symbol;Acc:HGNC:12671]
FRY	ENSG00000073910	5.18831	-0.810177	4.3561e-11	-0.929428	7.25642e-08	-0.690927	0.00010981	1.04732	2.21687e-17	0.928071	1.91571e-07	1.16657	2.47981e-12	1.8575	6.34434e-32	0.237144	0.248387	FRY microtubule binding protein [Source:HGNC Symbol;Acc:HGNC:20367]
PICALM	ENSG00000073921	7.57597	-0.265665	4.47171e-05	-0.225905	0.0195618	-0.305425	0.00137813	-0.380517	3.19505e-09	-0.340757	0.00022221	-0.420277	6.0442e-06	-0.114851	0.132627	-0.646182	1.41708e-09	phosphatidylinositol binding clathrin assembly protein [Source:HGNC Symbol;Acc:HGNC:15514]
NSF	ENSG00000073969	5.94501	0.0141771	0.879617	-0.216884	0.0697457	0.245238	0.0346107	0.406503	1.84965e-07	0.175442	0.146374	0.637564	6.11147e-09	0.392326	1.71468e-05	0.42068	0.0010843	N-ethylmaleimide sensitive factor, vesicle fusing ATPase [Source:HGNC Symbol;Acc:HGNC:8016]
GLI2	ENSG00000074047	2.27445	-0.671134	8.54508e-06	-0.491121	0.0269649	-0.851146	0.000150342	-0.109445	0.48942	0.0705672	0.785737	-0.289458	0.198467	0.561688	0.00117593	-0.780579	0.00143356	GLI family zinc finger 2 [Source:HGNC Symbol;Acc:HGNC:4318]
CLASP1	ENSG00000074054	6.1322	-0.189247	0.00241341	-0.277368	0.00228572	-0.101126	0.294412	-0.234136	0.000123104	-0.322257	0.000256696	-0.146015	0.110059	-0.0448889	0.552942	-0.423383	2.59141e-05	cytoplasmic linker associated protein 1 [Source:HGNC Symbol;Acc:HGNC:17088]
MRPS34	ENSG00000074071	6.26957	0.586253	3.59632e-07	0.316184	0.0728422	0.856322	1.44388e-07	0.259316	0.0227134	-0.0107525	0.958269	0.529385	0.000883878	-0.326937	0.0134561	0.84557	5.89204e-06	mitochondrial ribosomal protein S34 [Source:HGNC Symbol;Acc:HGNC:16618]
NOTCH3	ENSG00000074181	8.15464	0.182209	0.220022	0.58143	0.00685442	-0.217013	0.327961	-0.753537	7.31736e-08	-0.354316	0.0908627	-1.15276	3.50555e-08	-0.935746	1.47619e-08	-0.571328	0.0139138	notch receptor 3 [Source:HGNC Symbol;Acc:HGNC:7883]
CLNS1A	ENSG00000074201	6.78863	-0.191774	0.114146	-0.1058	0.591946	-0.277748	0.119348	-0.209418	0.0757545	-0.123444	0.514039	-0.295391	0.0874186	-0.0176433	0.906035	-0.401192	0.0385369	chloride nucleotide-sensitive channel 1A [Source:HGNC Symbol;Acc:HGNC:2080]
PPP2R2C	ENSG00000074211	4.46329	0.619525	0.0479897	0.119164	0.829132	1.11989	0.0099564	0.589296	0.0550209	0.0889348	0.868973	1.08966	0.0102351	-0.0302297	0.938171	1.20882	0.0173473	protein phosphatase 2 regulatory subunit Bgamma [Source:HGNC Symbol;Acc:HGNC:9306]
TEAD2	ENSG00000074219	6.07794	0.129422	0.309423	0.110985	0.583436	0.147858	0.43298	-0.924381	2.25409e-14	-0.942818	1.60857e-08	-0.905945	2.1245e-07	-1.0538	1.40659e-13	-0.79496	4.47425e-05	TEA domain transcription factor 2 [Source:HGNC Symbol;Acc:HGNC:11715]
EED	ENSG00000074266	4.43358	0.0358585	0.614944	0.144778	0.146413	-0.0730606	0.475843	-0.578016	1.00599e-18	-0.469097	1.92223e-07	-0.686935	2.52574e-13	-0.613875	9.34813e-16	-0.542158	2.01269e-07	embryonic ectoderm development [Source:HGNC Symbol;Acc:HGNC:3188]
CDHR2	ENSG00000074276	-0.491979	0.609263	6.77969e-05	0.300607	0.212224	0.917919	2.18171e-05	-0.774939	2.62852e-07	-1.0836	3.1968e-07	-0.466283	0.0364883	-1.3842	4.16128e-14	-0.165676	0.542553	cadherin related family member 2 [Source:HGNC Symbol;Acc:HGNC:18231]
SNCB	ENSG00000074317	-2.72291	1.06169	0.000237196	0.0440241	0.935253	2.07936	4.51947e-07	-0.852072	0.00254455	-1.86974	4.21304e-06	0.165595	0.713309	-1.91376	4.8847e-08	0.20962	0.685399	synuclein beta [Source:HGNC Symbol;Acc:HGNC:11140]
TSG101	ENSG00000074319	6.3036	0.0921128	0.232823	-0.0379526	0.768134	0.222178	0.039561	0.425203	4.74836e-09	0.295137	0.00619064	0.555268	4.85564e-08	0.33309	8.1925e-05	0.517316	1.43611e-05	tumor susceptibility 101 [Source:HGNC Symbol;Acc:HGNC:15971]
NCBP3	ENSG00000074356	5.60351	-0.216423	0.000171595	-0.0825815	0.373368	-0.350264	3.34185e-05	0.0598092	0.314536	0.19365	0.0227048	-0.0740319	0.399926	0.276232	3.08707e-05	-0.156613	0.103799	nuclear cap binding subunit 3 [Source:HGNC Symbol;Acc:HGNC:24612]
ATP2A3	ENSG00000074370	6.74712	-0.358855	0.0866603	-1.24555	1.75205e-05	0.527834	0.0773096	0.441897	0.0294496	-0.444793	0.142866	1.32859	1.73191e-06	0.800752	0.000667504	0.0830415	0.829097	ATPase sarcoplasmic/endoplasmic reticulum Ca2+ transporting 3 [Source:HGNC Symbol;Acc:HGNC:813]
CA12	ENSG00000074410	8.57075	-0.622752	0.00251976	-1.5364	1.36223e-07	0.290897	0.358507	3.89484	6.09804e-46	2.98119	1.32879e-17	4.80849	1.66445e-44	4.51759	3.79817e-45	3.27209	3.85172e-18	carbonic anhydrase 12 [Source:HGNC Symbol;Acc:HGNC:1371]
MGLL	ENSG00000074416	6.24147	-0.125147	0.44539	-0.557951	0.0118437	0.307657	0.175728	0.447342	0.00273846	0.0145382	0.957248	0.880146	2.27865e-05	0.572489	0.00103229	0.322195	0.209664	monoglyceride lipase [Source:HGNC Symbol;Acc:HGNC:17038]
NTN4	ENSG00000074527	6.6576	-0.917765	1.25616e-06	-0.311565	0.291585	-1.52397	1.74578e-07	1.41369	1.79802e-13	2.01989	1.02231e-11	0.80749	0.0018864	2.33146	2.9034e-22	0.495925	0.11504	netrin 4 [Source:HGNC Symbol;Acc:HGNC:13658]
BCS1L	ENSG00000074582	4.50256	0.481282	7.46366e-11	0.472655	1.34009e-05	0.489909	2.43261e-06	-0.27128	0.000143499	-0.279907	0.0074782	-0.262653	0.0121567	-0.752562	7.91908e-18	0.210002	0.0830298	BCS1 homolog, ubiquinol-cytochrome c reductase complex chaperone [Source:HGNC Symbol;Acc:HGNC:1020]
NUAK1	ENSG00000074590	4.77071	-0.586514	9.35353e-07	-0.883777	2.27873e-07	-0.289251	0.108934	0.443428	0.000152378	0.146165	0.444222	0.74069	6.27382e-06	1.02994	3.41081e-13	-0.143086	0.497683	NUAK family kinase 1 [Source:HGNC Symbol;Acc:HGNC:14311]
DPP8	ENSG00000074603	5.63853	-0.478709	1.68787e-10	-0.622429	5.6321e-09	-0.33499	0.00202841	0.497135	1.39261e-11	0.353416	0.00103367	0.640854	4.10893e-10	0.975845	4.55503e-26	0.0184258	0.897211	dipeptidyl peptidase 8 [Source:HGNC Symbol;Acc:HGNC:16490]
SLC24A1	ENSG00000074621	4.14759	-0.511211	6.47715e-09	-0.542776	1.65056e-05	-0.479646	0.000186699	0.72458	2.75466e-16	0.693015	6.1311e-08	0.756145	3.90482e-10	1.23579	9.16131e-29	0.21337	0.146014	solute carrier family 24 member 1 [Source:HGNC Symbol;Acc:HGNC:10975]
ZNF532	ENSG00000074657	6.31427	-0.2518	0.0112177	-0.16291	0.29528	-0.340689	0.0198389	-0.747873	4.07541e-14	-0.658983	1.62699e-06	-0.836762	5.18655e-09	-0.496073	1.20073e-05	-0.999672	7.08808e-10	zinc finger protein 532 [Source:HGNC Symbol;Acc:HGNC:30940]
SCARF1	ENSG00000074660	3.15968	-0.0342885	0.755282	0.134096	0.392837	-0.202673	0.168023	0.105426	0.287672	0.27381	0.0577013	-0.0629587	0.682365	0.139714	0.22017	0.0711371	0.686816	scavenger receptor class F member 1 [Source:HGNC Symbol;Acc:HGNC:16820]
LMAN1	ENSG00000074695	7.74379	-0.206462	0.0180929	-0.165066	0.220219	-0.247857	0.0551963	-0.128184	0.142479	-0.0867888	0.534544	-0.16958	0.186904	0.0782773	0.451713	-0.334646	0.0180148	lectin, mannose binding 1 [Source:HGNC Symbol;Acc:HGNC:6631]
HACD3	ENSG00000074696	7.76931	-0.163476	0.111934	-0.529772	0.000234568	0.202821	0.176495	0.804183	1.5836e-15	0.437886	0.00274235	1.17048	6.09598e-17	0.967658	5.46169e-16	0.640707	7.46968e-05	3-hydroxyacyl-CoA dehydratase 3 [Source:HGNC Symbol;Acc:HGNC:24175]
IPCEF1	ENSG00000074706	1.8818	-0.264179	0.145993	0.0841373	0.785817	-0.612496	0.0200414	-0.416046	0.0166482	-0.0677295	0.822909	-0.764363	0.00279116	-0.151867	0.472038	-0.680225	0.0181747	interaction protein for cytohesin exchange factors 1 [Source:HGNC Symbol;Acc:HGNC:21204]
ZZEF1	ENSG00000074755	5.93307	-0.347236	4.35231e-06	-0.396935	0.000297617	-0.297537	0.00758613	0.151729	0.044448	0.10203	0.395111	0.201428	0.0640698	0.498965	1.27517e-08	-0.195507	0.122444	zinc finger ZZ-type and EF-hand domain containing 1 [Source:HGNC Symbol;Acc:HGNC:29027]
ENO1	ENSG00000074800	10.276	0.404554	0.000141618	0.36485	0.0238082	0.444258	0.00354031	-1.33636	8.35188e-31	-1.37607	1.50233e-19	-1.29666	9.06266e-16	-1.74092	3.55797e-35	-0.931809	8.32928e-08	enolase 1 [Source:HGNC Symbol;Acc:HGNC:3350]
SLC12A1	ENSG00000074803	1.68952	-1.38915	8.20084e-05	-0.543375	0.313909	-2.23493	5.96131e-05	-2.40277	4.28959e-11	-1.55699	0.00116362	-3.24855	1.44931e-08	-1.01362	0.0113888	-3.79193	1.57459e-09	solute carrier family 12 member 1 [Source:HGNC Symbol;Acc:HGNC:10910]
MYDGF	ENSG00000074842	6.58039	0.486471	3.66348e-06	0.564927	0.000334836	0.408016	0.0068812	-0.105941	0.328133	-0.0274853	0.88113	-0.184396	0.241812	-0.592412	1.00932e-06	0.380531	0.0274485	myeloid derived growth factor [Source:HGNC Symbol;Acc:HGNC:16948]
ANO8	ENSG00000074855	4.31573	0.173292	0.102686	0.124582	0.46167	0.222002	0.150423	-0.0310934	0.784874	-0.0798034	0.639608	0.0176165	0.918642	-0.204386	0.0889537	0.142199	0.43081	anoctamin 8 [Source:HGNC Symbol;Acc:HGNC:29329]
TUBE1	ENSG00000074935	3.57994	-0.306246	0.00040442	-0.16804	0.212641	-0.444452	0.000481794	-0.398265	2.75706e-06	-0.260059	0.0397845	-0.536471	1.52908e-05	-0.0920193	0.374744	-0.704511	5.64016e-07	tubulin epsilon 1 [Source:HGNC Symbol;Acc:HGNC:20775]
ARHGEF10L	ENSG00000074964	5.77832	0.758742	6.47859e-16	0.94788	8.45214e-12	0.569604	8.77937e-06	-0.080034	0.392943	0.109104	0.449487	-0.269172	0.0396434	-0.838776	4.92879e-15	0.678708	3.46948e-06	Rho guanine nucleotide exchange factor 10 like [Source:HGNC Symbol;Acc:HGNC:25540]
TXK	ENSG00000074966	-0.139892	-0.344385	0.0865165	-0.276232	0.375252	-0.412539	0.170518	-0.197847	0.326525	-0.129694	0.690852	-0.266001	0.375164	0.146538	0.536084	-0.542233	0.0969913	TXK tyrosine kinase [Source:HGNC Symbol;Acc:HGNC:12434]
WSCD2	ENSG00000075035	0.498774	0.154982	0.652504	1.01968	0.0352387	-0.70972	0.136657	0.333881	0.29343	1.19858	0.0111763	-0.530821	0.258725	0.178899	0.635017	0.488863	0.362337	WSC domain containing 2 [Source:HGNC Symbol;Acc:HGNC:29117]
KCNQ2	ENSG00000075043	-0.550999	0.652998	0.110899	-1.00234	0.0867453	2.30833	5.25669e-05	-2.3948	8.34651e-09	-4.05013	2.43177e-12	-0.739461	0.224429	-3.04779	1.18752e-09	-1.7418	0.00859372	potassium voltage-gated channel subfamily Q member 2 [Source:HGNC Symbol;Acc:HGNC:6296]
TACR2	ENSG00000075073	0.438449	0.242939	0.112765	0.209233	0.386635	0.276645	0.217621	0.0577692	0.721004	0.024063	0.927831	0.0914753	0.698789	-0.18517	0.293156	0.300708	0.233774	tachykinin receptor 2 [Source:HGNC Symbol;Acc:HGNC:11527]
ACTR6	ENSG00000075089	5.04151	0.038386	0.698342	0.0924781	0.528195	-0.015706	0.918984	-0.237362	0.00625069	-0.18327	0.168082	-0.291454	0.022097	-0.275748	0.00650534	-0.198976	0.180415	actin related protein 6 [Source:HGNC Symbol;Acc:HGNC:24025]
TIPIN	ENSG00000075131	3.12263	0.158793	0.0673226	0.0554856	0.704734	0.2621	0.0345638	-0.473526	1.41402e-08	-0.576833	1.1418e-06	-0.370219	0.00231855	-0.632319	1.65004e-10	-0.314733	0.023599	TIMELESS interacting protein [Source:HGNC Symbol;Acc:HGNC:30750]
SRI	ENSG00000075142	6.51407	0.226084	0.0122614	0.104076	0.480101	0.348092	0.00690607	0.180389	0.0432348	0.0583807	0.698452	0.302397	0.0168606	-0.045695	0.678277	0.406473	0.00528802	sorcin [Source:HGNC Symbol;Acc:HGNC:11292]
EIF4G3	ENSG00000075151	6.50458	-0.326167	1.15768e-05	-0.560435	1.79183e-07	-0.0918995	0.436322	0.335444	4.33028e-06	0.101176	0.391419	0.569711	3.14588e-08	0.661611	5.90644e-14	0.00927643	0.948761	eukaryotic translation initiation factor 4 gamma 3 [Source:HGNC Symbol;Acc:HGNC:3298]
NUP37	ENSG00000075188	4.36258	0.0858545	0.283848	0.00515649	0.973089	0.166552	0.142294	-0.325165	1.16607e-05	-0.405863	0.000145792	-0.244467	0.0255676	-0.41102	2.44412e-06	-0.239311	0.0561986	nucleoporin 37 [Source:HGNC Symbol;Acc:HGNC:29929]
SEMA3A	ENSG00000075213	1.83311	-0.410835	0.0291744	-0.398818	0.159126	-0.422851	0.135597	-0.728829	6.44354e-05	-0.716813	0.00639892	-0.740845	0.00624023	-0.317995	0.143285	-1.13966	0.000167648	semaphorin 3A [Source:HGNC Symbol;Acc:HGNC:10723]
GTSE1	ENSG00000075218	4.13123	0.579848	1.15141e-06	0.358221	0.0484831	0.801475	1.96629e-06	-1.37829	3.28964e-27	-1.59992	6.80068e-21	-1.15666	5.34678e-11	-1.95814	3.66469e-35	-0.79844	3.48991e-05	G2 and S-phase expressed 1 [Source:HGNC Symbol;Acc:HGNC:13698]
SEMA3C	ENSG00000075223	7.23707	-0.914079	1.55228e-07	-1.25735	3.05107e-07	-0.570804	0.0276515	1.27579	3.39562e-13	0.932514	0.000278538	1.61907	8.82657e-12	2.18987	2.84497e-23	0.36171	0.216842	semaphorin 3C [Source:HGNC Symbol;Acc:HGNC:10725]
TTC38	ENSG00000075234	4.72386	0.280742	0.00339078	0.396557	0.00567694	0.164927	0.257241	0.223036	0.0183827	0.338851	0.0162264	0.107221	0.462746	-0.0577067	0.620408	0.503778	0.00115094	tetratricopeptide repeat domain 38 [Source:HGNC Symbol;Acc:HGNC:26082]
ACAT1	ENSG00000075239	5.87936	-0.0794667	0.506622	-0.00164134	0.993812	-0.157292	0.359583	-0.0392179	0.743437	0.0386075	0.838743	-0.117043	0.489663	0.0402488	0.767658	-0.118685	0.542776	acetyl-CoA acetyltransferase 1 [Source:HGNC Symbol;Acc:HGNC:93]
GRAMD4	ENSG00000075240	5.44531	0.223599	0.0103067	-0.0641191	0.664237	0.511317	3.24389e-05	-0.111883	0.20413	-0.399601	0.00112754	0.175835	0.165411	-0.335482	0.000730942	0.111716	0.462452	GRAM domain containing 4 [Source:HGNC Symbol;Acc:HGNC:29113]
CELSR1	ENSG00000075275	7.51129	-0.128718	0.35293	-0.242624	0.229881	-0.0148125	0.94835	1.9425	2.40069e-38	1.8286	1.29443e-18	2.05641	1.77225e-27	2.07122	2.85172e-33	1.81379	4.78456e-16	cadherin EGF LAG seven-pass G-type receptor 1 [Source:HGNC Symbol;Acc:HGNC:1850]
WNT8B	ENSG00000075290	-2.1265	-0.35076	0.124045	-0.314155	0.367828	-0.387364	0.262677	-0.513491	0.0188989	-0.476887	0.144916	-0.550096	0.0936764	-0.162732	0.54159	-0.864251	0.017194	Wnt family member 8B [Source:HGNC Symbol;Acc:HGNC:12789]
ZNF638	ENSG00000075292	7.23204	-0.333329	1.50588e-09	-0.347364	1.16558e-05	-0.319295	6.41598e-05	0.0228673	0.700558	0.00883277	0.928139	0.0369019	0.670671	0.356197	1.83481e-08	-0.310462	0.000453712	zinc finger protein 638 [Source:HGNC Symbol;Acc:HGNC:17894]
SLC25A40	ENSG00000075303	4.49009	-0.237574	0.0016362	-0.275977	0.013148	-0.199171	0.078355	0.116617	0.125479	0.0782141	0.522748	0.15502	0.160665	0.354191	4.34444e-05	-0.120957	0.354054	solute carrier family 25 member 40 [Source:HGNC Symbol;Acc:HGNC:29680]
TIMM21	ENSG00000075336	4.35126	0.133258	0.0736355	0.058235	0.638342	0.208281	0.0516656	-0.332158	3.08569e-06	-0.407181	6.98359e-05	-0.257135	0.0139598	-0.465416	3.1083e-08	-0.1989	0.100879	translocase of inner mitochondrial membrane 21 [Source:HGNC Symbol;Acc:HGNC:25010]
ADD2	ENSG00000075340	3.45929	0.107634	0.678099	0.160656	0.68729	0.0546115	0.892157	-2.04772	5.63418e-17	-1.9947	4.77471e-10	-2.10074	4.91623e-09	-2.15535	3.16784e-14	-1.94008	5.24063e-07	adducin 2 [Source:HGNC Symbol;Acc:HGNC:244]
RASAL2	ENSG00000075391	5.71285	-0.446089	1.97494e-06	-0.122481	0.41997	-0.769696	4.50908e-08	-0.612618	4.70716e-11	-0.289011	0.0341953	-0.936226	1.13473e-11	-0.16653	0.129191	-1.05871	9.66791e-12	RAS protein activator like 2 [Source:HGNC Symbol;Acc:HGNC:9874]
VPS9D1	ENSG00000075399	3.97386	0.579107	2.97014e-08	0.567611	0.000264162	0.590603	5.98647e-05	-0.214261	0.0380624	-0.225757	0.147169	-0.202765	0.189291	-0.793368	6.42684e-11	0.364846	0.0326188	VPS9 domain containing 1 [Source:HGNC Symbol;Acc:HGNC:13526]
ZNF37A	ENSG00000075407	5.38605	-0.314695	0.000478113	-0.121577	0.404231	-0.507814	0.000129407	0.0509356	0.597667	0.244054	0.0710361	-0.142183	0.296626	0.365631	0.000416341	-0.26376	0.0783388	zinc finger protein 37A [Source:HGNC Symbol;Acc:HGNC:13102]
MARK3	ENSG00000075413	6.06653	-0.0821913	0.121673	-0.152372	0.0482689	-0.0120106	0.893283	-0.031514	0.565021	-0.101695	0.193374	0.0386667	0.633595	0.0506773	0.411705	-0.113705	0.19047	microtubule affinity regulating kinase 3 [Source:HGNC Symbol;Acc:HGNC:6897]
SLC25A3	ENSG00000075415	8.40524	0.0421165	0.598003	-0.11662	0.308612	0.200853	0.059286	-0.155198	0.0306009	-0.313935	0.00231102	0.0035384	0.977302	-0.197315	0.0178935	-0.113082	0.366395	solute carrier family 25 member 3 [Source:HGNC Symbol;Acc:HGNC:10989]
FNDC3B	ENSG00000075420	6.93924	-0.563851	4.97979e-09	-0.365878	0.00912139	-0.761823	1.01876e-07	-0.961106	3.91932e-22	-0.763134	1.05563e-08	-1.15908	8.19159e-16	-0.397256	0.000294826	-1.52496	2.87934e-20	fibronectin type III domain containing 3B [Source:HGNC Symbol;Acc:HGNC:24670]
FOSL2	ENSG00000075426	7.43313	-0.149293	0.14046	-0.0602244	0.721363	-0.238361	0.106596	-0.0536735	0.608596	0.035395	0.834549	-0.142742	0.336312	0.0956194	0.41557	-0.202966	0.22143	FOS like 2, AP-1 transcription factor subunit [Source:HGNC Symbol;Acc:HGNC:3798]
CACNG4	ENSG00000075461	6.22699	0.419793	0.136686	-0.301189	0.497523	1.14078	0.00297715	1.70688	8.18739e-10	0.985893	0.0171335	2.42786	9.27407e-11	1.28708	4.96226e-05	2.12667	3.52079e-06	calcium voltage-gated channel auxiliary subunit gamma 4 [Source:HGNC Symbol;Acc:HGNC:1408]
FRYL	ENSG00000075539	6.16996	-0.437994	1.10628e-05	-0.644439	6.86374e-06	-0.231548	0.12524	0.58347	3.20845e-09	0.377024	0.0102713	0.789915	8.78328e-09	1.02146	1.98291e-17	0.145476	0.402844	FRY like transcription coactivator [Source:HGNC Symbol;Acc:HGNC:29127]
TMEM131	ENSG00000075568	6.47662	-0.373884	1.13736e-07	-0.625864	7.67035e-10	-0.121903	0.260611	0.0878077	0.221162	-0.164173	0.118605	0.339788	0.000526175	0.461691	1.44757e-08	-0.286076	0.0127392	transmembrane protein 131 [Source:HGNC Symbol;Acc:HGNC:30366]
FSCN1	ENSG00000075618	7.08181	0.316445	0.0404443	0.614705	0.00758149	0.0181848	0.946097	-1.95444	5.99666e-31	-1.65618	6.90842e-15	-2.2527	5.03169e-20	-2.27088	5.03469e-30	-1.63799	1.12073e-10	fascin actin-bundling protein 1 [Source:HGNC Symbol;Acc:HGNC:11148]
ACTB	ENSG00000075624	12.488	0.124409	0.133809	0.0743354	0.582056	0.174482	0.146638	-0.571416	9.05998e-13	-0.62149	3.06591e-08	-0.521343	5.45409e-06	-0.695825	1.93071e-13	-0.447008	0.000580396	actin beta [Source:HGNC Symbol;Acc:HGNC:132]
MOCOS	ENSG00000075643	4.5606	0.16016	0.272125	0.446086	0.0345973	-0.125766	0.576784	-0.693656	3.40407e-07	-0.40773	0.042445	-0.979582	1.17566e-06	-0.853816	1.00437e-07	-0.533496	0.0185515	molybdenum cofactor sulfurase [Source:HGNC Symbol;Acc:HGNC:18234]
PLD1	ENSG00000075651	4.40245	-0.462248	0.000115729	-0.369928	0.0380383	-0.554568	0.00179162	-1.1746	4.99365e-21	-1.08228	9.45961e-11	-1.26692	1.79831e-12	-0.71235	2.85256e-07	-1.63685	1.19968e-15	phospholipase D1 [Source:HGNC Symbol;Acc:HGNC:9067]
ATP12A	ENSG00000075673	-1.2555	0.508171	0.142588	0.327621	0.558548	0.688722	0.169828	-1.84791	5.19905e-08	-2.02846	1.10593e-05	-1.66736	0.00096252	-2.35608	5.83821e-09	-1.33974	0.0154634	ATPase H+/K+ transporting non-gastric alpha2 subunit [Source:HGNC Symbol;Acc:HGNC:13816]
WDR62	ENSG00000075702	4.14578	0.920528	1.79683e-13	0.721508	7.58622e-05	1.11955	9.97225e-11	-0.7819	7.94847e-11	-0.98092	5.43426e-09	-0.582881	0.000815024	-1.70243	4.05118e-28	0.138628	0.518261	WD repeat domain 62 [Source:HGNC Symbol;Acc:HGNC:24502]
DLG1	ENSG00000075711	6.40552	-0.251459	0.00069233	-0.252027	0.0220735	-0.25089	0.0224204	-0.228078	0.00175108	-0.228646	0.0345328	-0.22751	0.0341431	0.0233809	0.800935	-0.479537	6.43734e-05	discs large MAGUK scaffold protein 1 [Source:HGNC Symbol;Acc:HGNC:2900]
RAB7A	ENSG00000075785	8.29064	0.145984	0.0282045	0.0449962	0.690033	0.246972	0.00921156	-0.141878	0.0293559	-0.242866	0.0101413	-0.04089	0.696586	-0.287862	0.00013009	0.00410615	0.974449	RAB7A, member RAS oncogene family [Source:HGNC Symbol;Acc:HGNC:9788]
BCAP29	ENSG00000075790	5.94103	-0.355453	7.15041e-06	-0.378801	0.00100233	-0.332104	0.00437827	0.0146814	0.869581	-0.00866722	0.951768	0.03803	0.766209	0.370134	4.82163e-05	-0.340771	0.00833667	B cell receptor associated protein 29 [Source:HGNC Symbol;Acc:HGNC:24131]
SEC31B	ENSG00000075826	2.4562	0.0195063	0.911839	-0.0598278	0.820783	0.0988404	0.686912	0.549225	0.000153041	0.469891	0.0332293	0.628559	0.00216715	0.529718	0.00182504	0.568731	0.0189746	SEC31 homolog B, COPII coat complex component [Source:HGNC Symbol;Acc:HGNC:23197]
SART3	ENSG00000075856	5.96749	0.0043542	0.948773	-0.0956285	0.286847	0.104337	0.227374	0.0232235	0.706635	-0.0767592	0.390771	0.123206	0.137735	0.0188693	0.790023	0.0275777	0.79537	spliceosome associated factor 3, U4/U6 recycling protein [Source:HGNC Symbol;Acc:HGNC:16860]
ARHGAP15	ENSG00000075884	3.19313	-0.268719	0.0767844	0.0802798	0.757318	-0.617717	0.00508138	-0.129227	0.401491	0.219771	0.346208	-0.478226	0.0268308	0.139492	0.433011	-0.397946	0.107679	Rho GTPase activating protein 15 [Source:HGNC Symbol;Acc:HGNC:21030]
TUBA3D	ENSG00000075886	2.76317	-1.41457	1.12904e-06	-1.79833	1.03114e-05	-1.03081	0.0170251	4.19359	3.35649e-31	3.80982	2.77174e-14	4.57735	1.16392e-25	5.60816	5.63486e-36	2.77902	1.82179e-08	tubulin alpha 3d [Source:HGNC Symbol;Acc:HGNC:24071]
PAX2	ENSG00000075891	0.879815	0.294716	0.444948	0.0728063	0.913109	0.516627	0.341106	2.0564	2.14799e-08	1.83449	0.000969928	2.27831	2.64814e-06	1.76169	2.76048e-05	2.35112	9.91346e-05	paired box 2 [Source:HGNC Symbol;Acc:HGNC:8616]
EXOSC7	ENSG00000075914	4.85456	0.395317	2.08977e-08	0.334559	0.00136265	0.456075	5.20278e-06	-0.144046	0.0392417	-0.204804	0.0463696	-0.0832879	0.438852	-0.539363	4.56113e-11	0.251271	0.0292772	exosome component 7 [Source:HGNC Symbol;Acc:HGNC:28112]
KIFAP3	ENSG00000075945	5.99848	-0.0934633	0.244459	0.121215	0.322412	-0.308142	0.00617361	-0.226565	0.0025836	-0.0118861	0.930784	-0.441243	5.24291e-05	-0.133101	0.13719	-0.320028	0.0102927	kinesin associated protein 3 [Source:HGNC Symbol;Acc:HGNC:17060]
MKRN2	ENSG00000075975	5.17477	-0.0207898	0.77811	-0.126619	0.207542	0.0850395	0.400157	-0.201257	0.00149629	-0.307086	0.000812126	-0.0954276	0.328804	-0.180467	0.015306	-0.222047	0.0366043	makorin ring finger protein 2 [Source:HGNC Symbol;Acc:HGNC:7113]
MCM6	ENSG00000076003	6.41152	0.0457012	0.639684	-0.140716	0.31147	0.232118	0.0733061	-1.04386	9.83623e-29	-1.23027	3.18137e-22	-0.857438	2.42068e-11	-1.08956	1.0495e-23	-0.998154	6.44419e-12	minichromosome maintenance complex component 6 [Source:HGNC Symbol;Acc:HGNC:6949]
REXO2	ENSG00000076043	5.43296	0.158203	0.0434801	0.308392	0.00752158	0.00801328	0.95292	-0.715857	1.06544e-19	-0.565668	1.49314e-07	-0.866047	2.61542e-14	-0.87406	1.05468e-20	-0.557655	7.51959e-06	RNA exonuclease 2 [Source:HGNC Symbol;Acc:HGNC:17851]
RBM7	ENSG00000076053	4.37429	-0.290541	3.35635e-05	-0.17331	0.105047	-0.407772	7.36493e-05	-0.530989	4.21742e-14	-0.413758	2.76734e-05	-0.64822	1.77666e-10	-0.240448	0.00287843	-0.82153	1.55677e-12	RNA binding motif protein 7 [Source:HGNC Symbol;Acc:HGNC:9904]
RBMS2	ENSG00000076067	5.361	-0.375792	8.47833e-08	-0.294861	0.00398192	-0.456724	9.09699e-06	-0.164923	0.0172737	-0.083991	0.450529	-0.245854	0.0145822	0.21087	0.00886045	-0.540715	1.82093e-06	RNA binding motif single stranded interacting protein 2 [Source:HGNC Symbol;Acc:HGNC:9909]
BAZ2A	ENSG00000076108	7.07228	-0.280077	0.000277392	-0.465292	2.99618e-05	-0.0948626	0.437962	0.386602	3.32561e-07	0.201387	0.0820808	0.571816	8.01002e-08	0.666679	2.41696e-13	0.106525	0.430441	bromodomain adjacent to zinc finger domain 2A [Source:HGNC Symbol;Acc:HGNC:962]
PTPN23	ENSG00000076201	6.16129	0.154561	0.0188739	0.0172627	0.884856	0.291858	0.00178468	0.0845985	0.202056	-0.0526994	0.623299	0.221896	0.0161449	-0.0699621	0.368576	0.239159	0.0251109	protein tyrosine phosphatase non-receptor type 23 [Source:HGNC Symbol;Acc:HGNC:14406]
MLH1	ENSG00000076242	5.30548	-0.315842	1.09817e-06	-0.523084	2.34208e-08	-0.108601	0.27839	0.171511	0.00733176	-0.0357299	0.745752	0.378752	2.54842e-05	0.487354	1.16177e-10	-0.144331	0.187384	mutL homolog 1 [Source:HGNC Symbol;Acc:HGNC:7127]
UNG	ENSG00000076248	6.02186	0.320157	0.000433981	0.174068	0.22583	0.466246	0.000321069	-0.47158	1.35165e-07	-0.617668	1.19056e-06	-0.325491	0.0131805	-0.791737	1.84273e-13	-0.151423	0.335419	uracil DNA glycosylase [Source:HGNC Symbol;Acc:HGNC:12572]
FMO4	ENSG00000076258	2.93652	-0.76877	4.78875e-09	-1.10295	2.84775e-09	-0.434587	0.0249131	-0.6927	6.13269e-08	-1.02688	1.18515e-08	-0.358518	0.0591514	0.0760693	0.631486	-1.46147	1.56438e-11	flavin containing dimethylaniline monoxygenase 4 [Source:HGNC Symbol;Acc:HGNC:3772]
KLHL20	ENSG00000076321	4.34726	-0.490668	5.35842e-12	-0.474777	2.48333e-06	-0.506558	9.10512e-07	0.0147508	0.851009	0.0306413	0.799658	-0.00113979	0.992282	0.505418	5.071e-10	-0.475917	2.51804e-05	kelch like family member 20 [Source:HGNC Symbol;Acc:HGNC:25056]
RGS11	ENSG00000076344	3.08535	0.861076	3.60249e-05	0.477686	0.142301	1.24447	1.83965e-05	2.07645	1.29066e-20	1.69306	1.0795e-07	2.45984	3.06556e-17	1.21537	4.98756e-07	2.93752	2.43087e-15	regulator of G protein signaling 11 [Source:HGNC Symbol;Acc:HGNC:9993]
SLC46A1	ENSG00000076351	3.78816	0.0923142	0.434235	-0.367648	0.0229138	0.552277	0.000366312	1.32232	4.6467e-29	0.862361	8.5683e-08	1.78229	7.6087e-29	1.23001	3.65155e-20	1.41464	1.86084e-14	solute carrier family 46 member 1 [Source:HGNC Symbol;Acc:HGNC:30521]
PLXNA2	ENSG00000076356	5.19936	-0.130963	0.378774	0.326816	0.130752	-0.588743	0.00434004	-0.649255	1.98306e-06	-0.191475	0.378143	-1.10703	5.89124e-08	-0.518292	0.0011779	-0.780218	0.000550777	plexin A2 [Source:HGNC Symbol;Acc:HGNC:9100]
SPAG5	ENSG00000076382	5.45113	0.475894	9.60782e-05	-0.150918	0.446091	1.10271	2.58364e-10	-0.67153	2.4056e-08	-1.29834	3.39988e-14	-0.0447176	0.823061	-1.14742	3.89203e-15	-0.195636	0.354197	sperm associated antigen 5 [Source:HGNC Symbol;Acc:HGNC:13452]
ANKRD13A	ENSG00000076513	5.76298	-0.191097	0.00489976	-0.245344	0.0140594	-0.136851	0.184179	-0.173691	0.00927102	-0.227937	0.0200981	-0.119444	0.237874	0.0174069	0.837772	-0.364788	0.000868036	ankyrin repeat domain 13A [Source:HGNC Symbol;Acc:HGNC:21268]
TPD52	ENSG00000076554	8.14159	0.428174	0.00142856	0.243131	0.253811	0.613218	0.00128678	0.300266	0.0240224	0.115223	0.602879	0.485309	0.00981009	-0.127908	0.426765	0.72844	0.00083914	tumor protein D52 [Source:HGNC Symbol;Acc:HGNC:12005]
ACACB	ENSG00000076555	4.72802	-0.384873	0.00575986	-0.234057	0.282942	-0.53569	0.00934096	1.29012	3.1479e-19	1.44094	1.08519e-11	1.1393	2.03902e-09	1.67499	3.87366e-22	0.905248	6.03813e-05	acetyl-CoA carboxylase beta [Source:HGNC Symbol;Acc:HGNC:85]
TRAF4	ENSG00000076604	6.8033	0.420891	7.18387e-05	-0.0524906	0.777714	0.894273	3.53076e-09	-0.191321	0.0717597	-0.664702	7.1277e-06	0.282061	0.0636026	-0.612212	5.77413e-07	0.22957	0.200836	TNF receptor associated factor 4 [Source:HGNC Symbol;Acc:HGNC:12034]
PAG1	ENSG00000076641	4.31111	-0.516004	0.00012447	-0.532089	0.00665628	-0.49992	0.0125668	-0.696341	1.47751e-07	-0.712426	0.000153025	-0.680257	0.000464718	-0.180337	0.257199	-1.21235	4.19901e-08	phosphoprotein membrane anchor with glycosphingolipid microdomains 1 [Source:HGNC Symbol;Acc:HGNC:30043]
GPATCH1	ENSG00000076650	4.20426	0.275901	0.000115919	0.244984	0.0236833	0.306818	0.00290159	-0.0606516	0.416996	-0.0915687	0.419493	-0.0297345	0.799409	-0.336553	4.35317e-05	0.215249	0.0703979	G-patch domain containing 1 [Source:HGNC Symbol;Acc:HGNC:24658]
ICAM3	ENSG00000076662	1.11688	-0.0755684	0.749402	0.0025375	0.994958	-0.153674	0.657117	-0.554434	0.00695735	-0.476328	0.121767	-0.63254	0.0389317	-0.478866	0.047028	-0.630003	0.06831	intercellular adhesion molecule 3 [Source:HGNC Symbol;Acc:HGNC:5346]
NT5C2	ENSG00000076685	5.03089	-0.363808	0.00113391	-0.392092	0.0172305	-0.335523	0.0449493	-0.855253	2.88716e-14	-0.883537	1.32918e-08	-0.826968	3.27245e-07	-0.491445	0.000129032	-1.21906	4.76681e-11	5'-nucleotidase, cytosolic II [Source:HGNC Symbol;Acc:HGNC:8022]
MCAM	ENSG00000076706	6.98325	-0.0714107	0.568554	0.0961999	0.617649	-0.239021	0.167584	-0.490189	1.06589e-05	-0.322578	0.0521325	-0.657799	5.73778e-05	-0.418778	0.00133572	-0.561599	0.00234405	melanoma cell adhesion molecule [Source:HGNC Symbol;Acc:HGNC:6934]
GPC4	ENSG00000076716	5.89748	-0.659549	0.000238507	-0.679213	0.00922271	-0.639885	0.0172765	0.20446	0.265287	0.184796	0.526494	0.224124	0.407441	0.864009	3.00642e-05	-0.455089	0.129645	glypican 4 [Source:HGNC Symbol;Acc:HGNC:4452]
MBNL3	ENSG00000076770	4.31438	-0.806652	3.73137e-08	-0.85666	3.75567e-05	-0.756643	0.000461469	-0.733467	2.92575e-07	-0.783475	0.000110587	-0.683458	0.00115249	0.0731849	0.682325	-1.54012	2.06655e-10	muscleblind like splicing regulator 3 [Source:HGNC Symbol;Acc:HGNC:20564]
CAMSAP3	ENSG00000076826	5.41625	0.591562	1.45003e-07	0.328103	0.0551733	0.855021	7.60661e-08	0.353733	0.00130488	0.0902738	0.626428	0.617192	6.38332e-05	-0.237829	0.0676265	0.945295	2.3786e-07	calmodulin regulated spectrin associated protein family member 3 [Source:HGNC Symbol;Acc:HGNC:29307]
RAP1GAP	ENSG00000076864	5.02047	-0.073933	0.701137	-0.627896	0.012025	0.480029	0.054947	-0.140072	0.433033	-0.694035	0.00418237	0.41389	0.0924002	-0.0661393	0.755778	-0.214005	0.477955	RAP1 GTPase activating protein [Source:HGNC Symbol;Acc:HGNC:9858]
XAB2	ENSG00000076924	6.11487	0.567688	1.4192e-09	0.48403	0.000483583	0.651345	7.96441e-07	0.27451	0.00262825	0.190853	0.179197	0.358168	0.00593486	-0.293177	0.00600729	0.842198	2.87743e-08	XPA binding protein 2 [Source:HGNC Symbol;Acc:HGNC:14089]
ARHGEF1	ENSG00000076928	6.56183	0.523318	1.69001e-08	0.694573	5.39391e-07	0.352063	0.00798074	-0.00334084	0.975346	0.167914	0.238063	-0.174596	0.203363	-0.526659	7.11901e-07	0.519977	0.000501421	Rho guanine nucleotide exchange factor 1 [Source:HGNC Symbol;Acc:HGNC:681]
STXBP2	ENSG00000076944	5.84549	0.414228	0.000360056	0.345206	0.0517955	0.48325	0.00360979	0.675675	4.07096e-09	0.606653	0.000366524	0.744697	3.03849e-06	0.261447	0.0523726	1.0899	1.19053e-08	syntaxin binding protein 2 [Source:HGNC Symbol;Acc:HGNC:11445]
MAP2K7	ENSG00000076984	5.40593	0.494634	2.04178e-10	0.505191	1.0408e-05	0.484078	9.74153e-06	-0.0428911	0.601966	-0.032335	0.807099	-0.0534473	0.661567	-0.537526	1.66454e-09	0.451743	0.000281909	mitogen-activated protein kinase kinase 7 [Source:HGNC Symbol;Acc:HGNC:6847]
DGKD	ENSG00000077044	5.52953	-0.315027	0.00236441	-0.513854	0.000588381	-0.116201	0.482051	0.605171	3.20794e-09	0.406344	0.00758076	0.803997	1.59357e-08	0.920198	6.47282e-14	0.290144	0.0921792	diacylglycerol kinase delta [Source:HGNC Symbol;Acc:HGNC:2851]
CTTNBP2	ENSG00000077063	2.07689	-1.33211	7.93547e-09	-2.61741	1.66781e-15	-0.0468081	0.904864	0.838061	0.00016475	-0.447242	0.186064	2.12336	8.15462e-12	2.17017	6.1235e-15	-0.49405	0.194669	cortactin binding protein 2 [Source:HGNC Symbol;Acc:HGNC:15679]
RARB	ENSG00000077092	3.34041	-0.254016	0.0727657	0.541326	0.00975157	-1.04936	5.36348e-07	-1.01805	2.59319e-13	-0.222707	0.294897	-1.81339	5.22123e-17	-0.764034	1.69068e-06	-1.27207	2.34592e-08	retinoic acid receptor beta [Source:HGNC Symbol;Acc:HGNC:9865]
TOP2B	ENSG00000077097	7.83945	-0.438996	6.14272e-09	-0.486917	6.76113e-06	-0.391075	0.000369714	-0.0933292	0.222627	-0.14125	0.216364	-0.0454085	0.705451	0.345667	6.00431e-05	-0.532325	1.14604e-05	DNA topoisomerase II beta [Source:HGNC Symbol;Acc:HGNC:11990]
TM9SF3	ENSG00000077147	8.20618	-0.274489	0.000163177	-0.370706	0.000462929	-0.178272	0.104768	-0.0384819	0.623403	-0.134699	0.226235	0.0577349	0.614642	0.236007	0.00491964	-0.312971	0.00846684	transmembrane 9 superfamily member 3 [Source:HGNC Symbol;Acc:HGNC:21529]
NFKB2	ENSG00000077150	5.97838	0.564432	1.21217e-08	0.788542	1.13156e-07	0.340321	0.0167728	-0.353124	0.000244381	-0.129014	0.404424	-0.577234	4.16913e-05	-0.917556	4.40246e-15	0.211308	0.203709	nuclear factor kappa B subunit 2 [Source:HGNC Symbol;Acc:HGNC:7795]
UBE2T	ENSG00000077152	5.00014	0.693529	1.99695e-07	0.48685	0.0154702	0.900208	1.57459e-06	-0.974462	2.6607e-13	-1.18114	1.45319e-10	-0.767783	6.16853e-05	-1.66799	1.11858e-23	-0.280933	0.210693	ubiquitin conjugating enzyme E2 T [Source:HGNC Symbol;Acc:HGNC:25009]
PPP1R12B	ENSG00000077157	5.66813	-0.544635	5.50335e-07	-0.322322	0.04642	-0.766949	2.16082e-06	0.119731	0.282571	0.342045	0.0340831	-0.102582	0.544927	0.664366	1.2362e-07	-0.424904	0.016782	protein phosphatase 1 regulatory subunit 12B [Source:HGNC Symbol;Acc:HGNC:7619]
DNAJC10	ENSG00000077232	7.451	-0.321257	0.000281065	-0.527303	3.66415e-05	-0.115211	0.410319	0.0267803	0.784399	-0.179266	0.180943	0.232826	0.0672915	0.348038	0.000623925	-0.294477	0.0438098	DnaJ heat shock protein family (Hsp40) member C10 [Source:HGNC Symbol;Acc:HGNC:24637]
GTF3C1	ENSG00000077235	7.25195	-0.00958803	0.90598	-0.339024	0.000610667	0.319848	0.0010366	0.425647	2.62153e-10	0.096211	0.370461	0.755083	2.78575e-15	0.435235	3.28533e-08	0.416059	0.000160448	general transcription factor IIIC subunit 1 [Source:HGNC Symbol;Acc:HGNC:4664]
IL4R	ENSG00000077238	5.7425	-0.0840748	0.471477	-0.180408	0.286752	0.0122589	0.94835	0.0377911	0.748298	-0.0585426	0.748371	0.134125	0.409898	0.121866	0.341285	-0.0462836	0.819587	interleukin 4 receptor [Source:HGNC Symbol;Acc:HGNC:6015]
USP33	ENSG00000077254	6.26604	-0.288839	8.9631e-05	-0.134965	0.243684	-0.442713	4.43788e-05	0.182925	0.0122995	0.336799	0.00176446	0.0290508	0.809511	0.471764	3.4333e-08	-0.105914	0.411444	ubiquitin specific peptidase 33 [Source:HGNC Symbol;Acc:HGNC:20059]
PAK3	ENSG00000077264	1.93933	-0.472797	0.0324919	0.176629	0.634003	-1.12222	0.000661744	-1.2467	9.67567e-09	-0.597273	0.0586088	-1.89613	1.27993e-08	-0.773902	0.00200899	-1.7195	1.84372e-06	p21 (RAC1) activated kinase 3 [Source:HGNC Symbol;Acc:HGNC:8592]
CAPN6	ENSG00000077274	4.64795	-0.755196	0.0452907	0.351713	0.572966	-1.8621	0.00136606	-3.33557	8.69152e-16	-2.22866	1.11515e-05	-4.44247	1.41417e-11	-2.58037	9.44478e-09	-4.09076	1.59318e-09	calpain 6 [Source:HGNC Symbol;Acc:HGNC:1483]
DCX	ENSG00000077279	1.87911	0.793667	0.0619808	1.19513	0.069409	0.392204	0.551867	-1.29742	0.00168333	-0.895958	0.141055	-1.69888	0.00720914	-2.09109	2.13906e-05	-0.503754	0.490772	doublecortin [Source:HGNC Symbol;Acc:HGNC:2714]
SNRPA	ENSG00000077312	6.24512	0.656919	6.95228e-13	0.499432	0.000179849	0.814406	2.04955e-10	-0.43096	8.3535e-07	-0.588446	2.35865e-06	-0.273473	0.0344902	-1.08788	4.88468e-23	0.225959	0.130626	small nuclear ribonucleoprotein polypeptide A [Source:HGNC Symbol;Acc:HGNC:11151]
SPAG6	ENSG00000077327	2.72843	0.260253	0.552697	-0.0501897	0.947515	0.570696	0.341329	5.10308	2.48598e-23	4.79264	4.97563e-11	5.41353	5.3123e-19	4.84283	2.69339e-18	5.36334	6.65826e-12	sperm associated antigen 6 [Source:HGNC Symbol;Acc:HGNC:11215]
EXOSC5	ENSG00000077348	4.77423	0.859669	8.15199e-15	0.87386	6.81962e-08	0.845477	2.53716e-08	-0.199576	0.0611389	-0.185384	0.255924	-0.213767	0.177382	-1.05924	1.28661e-16	0.660093	0.000135752	exosome component 5 [Source:HGNC Symbol;Acc:HGNC:24662]
DYNC1I2	ENSG00000077380	6.8318	-0.409724	2.46058e-08	-0.391965	0.000218252	-0.427483	6.68768e-05	0.202044	0.00505609	0.219804	0.0430726	0.184285	0.0807852	0.611768	1.14513e-12	-0.20768	0.0878554	dynein cytoplasmic 1 intermediate chain 2 [Source:HGNC Symbol;Acc:HGNC:2964]
APBB1IP	ENSG00000077420	4.15728	-0.401143	0.00210868	-0.154212	0.466793	-0.648074	0.000782712	-0.101329	0.457293	0.145602	0.488331	-0.348261	0.0679685	0.299814	0.0470692	-0.502472	0.018541	amyloid beta precursor protein binding family B member 1 interacting protein [Source:HGNC Symbol;Acc:HGNC:17379]
LRCH4	ENSG00000077454	3.95146	0.121391	0.171322	-0.0738277	0.607333	0.31661	0.0101768	0.160967	0.0592438	-0.0342523	0.81589	0.356186	0.00285069	0.0395754	0.707239	0.282358	0.0448766	leucine rich repeats and calponin homology domain containing 4 [Source:HGNC Symbol;Acc:HGNC:6691]
FAM76B	ENSG00000077458	4.08629	-0.170725	0.0388713	0.0887365	0.509969	-0.430187	0.000306357	-0.200644	0.0125114	0.0588175	0.664905	-0.460106	7.35762e-05	-0.029919	0.767445	-0.37137	0.00498176	family with sequence similarity 76 member B [Source:HGNC Symbol;Acc:HGNC:28492]
SIRT6	ENSG00000077463	4.16056	0.746271	2.02405e-12	0.764601	9.9719e-07	0.727941	7.35929e-07	0.0245953	0.831403	0.0429249	0.810635	0.00626559	0.971797	-0.721676	2.06132e-09	0.770866	4.60194e-06	sirtuin 6 [Source:HGNC Symbol;Acc:HGNC:14934]
POLD3	ENSG00000077514	5.03252	-0.0304772	0.766119	0.0312055	0.84724	-0.0921598	0.524412	-0.55248	4.82193e-10	-0.490797	0.000100424	-0.614162	1.85993e-06	-0.522002	4.6309e-07	-0.582957	6.02003e-05	DNA polymerase delta 3, accessory subunit [Source:HGNC Symbol;Acc:HGNC:20932]
ACTN2	ENSG00000077522	1.00828	0.139345	0.699382	0.206679	0.710515	0.0720101	0.897234	-1.27486	6.56348e-05	-1.20752	0.00749105	-1.34219	0.00530275	-1.4142	0.000157818	-1.13551	0.0330377	actinin alpha 2 [Source:HGNC Symbol;Acc:HGNC:164]
CAPZB	ENSG00000077549	8.08089	0.228565	0.00136318	0.0536485	0.66095	0.403481	7.25401e-05	-0.0485106	0.520238	-0.223427	0.0316132	0.126406	0.232067	-0.277075	0.000717582	0.180054	0.132078	capping actin protein of muscle Z-line subunit beta [Source:HGNC Symbol;Acc:HGNC:1491]
GPR137B	ENSG00000077585	5.19068	-0.334576	0.00319104	-0.801312	7.60372e-07	0.132161	0.458678	0.199414	0.0787853	-0.267322	0.112201	0.666151	1.89179e-05	0.53399	4.07716e-05	-0.135161	0.499355	G protein-coupled receptor 137B [Source:HGNC Symbol;Acc:HGNC:11862]
NAALAD2	ENSG00000077616	0.428946	-0.562214	1.88486e-05	-0.360275	0.0671836	-0.764152	9.22736e-05	-0.0930289	0.501361	0.10891	0.615972	-0.294967	0.130043	0.469185	0.0018984	-0.655243	0.00217294	N-acetylated alpha-linked acidic dipeptidase 2 [Source:HGNC Symbol;Acc:HGNC:14526]
JADE1	ENSG00000077684	5.20508	-0.0103271	0.922332	0.0302799	0.85049	-0.050934	0.733741	0.274326	0.00172456	0.314933	0.0165247	0.233719	0.0677556	0.284653	0.00546809	0.263999	0.0742219	jade family PHD finger 1 [Source:HGNC Symbol;Acc:HGNC:30027]
SLC25A43	ENSG00000077713	4.89097	0.0865543	0.362179	0.0740304	0.623743	0.0990782	0.482595	-0.454386	1.92842e-07	-0.46691	0.000192633	-0.441862	0.000511928	-0.54094	1.38314e-07	-0.367831	0.0112302	solute carrier family 25 member 43 [Source:HGNC Symbol;Acc:HGNC:30557]
UBE2A	ENSG00000077721	6.38038	-0.00851305	0.913231	-0.106033	0.309403	0.0890068	0.386431	-0.349422	6.23524e-08	-0.446942	1.25496e-06	-0.251902	0.00750901	-0.340909	6.47193e-06	-0.357935	0.000775177	ubiquitin conjugating enzyme E2 A [Source:HGNC Symbol;Acc:HGNC:12472]
FGFR1	ENSG00000077782	7.15772	0.975075	1.94472e-09	0.476001	0.0520655	1.47415	9.04667e-11	0.717185	4.93433e-06	0.218111	0.389825	1.21626	2.40787e-08	-0.25789	0.168625	1.69226	2.73509e-10	fibroblast growth factor receptor 1 [Source:HGNC Symbol;Acc:HGNC:3688]
SMC1B	ENSG00000077935	1.79209	0.423399	0.081863	0.446316	0.236378	0.400482	0.266286	-2.49627	8.22713e-22	-2.47335	9.27029e-14	-2.51919	2.54714e-11	-2.91967	2.22358e-21	-2.07287	1.83206e-07	structural maintenance of chromosomes 1B [Source:HGNC Symbol;Acc:HGNC:11112]
FBLN1	ENSG00000077942	7.85236	-0.0827384	0.610268	0.0901185	0.722877	-0.255595	0.259262	0.214884	0.147168	0.387741	0.0795815	0.0420275	0.862369	0.297623	0.0811055	0.132146	0.617437	fibulin 1 [Source:HGNC Symbol;Acc:HGNC:3600]
ITGA8	ENSG00000077943	2.7874	-0.49958	0.000480882	-0.510432	0.0150111	-0.488727	0.0222468	0.292306	0.0404271	0.281454	0.202346	0.303158	0.145567	0.791886	1.70659e-06	-0.207273	0.406008	integrin subunit alpha 8 [Source:HGNC Symbol;Acc:HGNC:6144]
CST7	ENSG00000077984	2.81827	0.0941265	0.651288	0.135871	0.672269	0.052382	0.870854	-0.390003	0.0359966	-0.348258	0.217784	-0.431747	0.119662	-0.484129	0.0250119	-0.295876	0.360365	cystatin F [Source:HGNC Symbol;Acc:HGNC:2479]
MAP2	ENSG00000078018	4.64619	-0.253472	0.178136	0.270015	0.356361	-0.776959	0.00411854	-2.19924	6.80018e-28	-1.67575	2.33686e-11	-2.72272	1.27392e-19	-1.94576	3.18873e-18	-2.45271	7.61636e-15	microtubule associated protein 2 [Source:HGNC Symbol;Acc:HGNC:6839]
PIAS2	ENSG00000078043	5.08568	-0.195634	0.02422	-0.124446	0.364892	-0.266822	0.0365064	-0.0266507	0.777828	0.0445371	0.761835	-0.0978385	0.458205	0.168983	0.0908282	-0.222285	0.120902	protein inhibitor of activated STAT 2 [Source:HGNC Symbol;Acc:HGNC:17311]
AMPH	ENSG00000078053	3.28911	-0.68849	0.00324266	-0.871718	0.00977396	-0.505262	0.156798	1.81318	5.68292e-14	1.62996	4.61032e-06	1.99641	3.53605e-10	2.50167	1.437e-17	1.12469	0.00321033	amphiphysin [Source:HGNC Symbol;Acc:HGNC:471]
ARAF	ENSG00000078061	6.18474	0.111854	0.1832	0.133367	0.300279	0.0903401	0.4803	0.056365	0.507675	0.0778785	0.554778	0.0348515	0.790191	-0.0554887	0.571411	0.168219	0.218795	A-Raf proto-oncogene, serine/threonine kinase [Source:HGNC Symbol;Acc:HGNC:646]
MCCC1	ENSG00000078070	5.37404	0.130193	0.157927	0.132286	0.355706	0.1281	0.352672	-1.11501	4.28913e-31	-1.11292	1.68091e-18	-1.1171	7.47127e-17	-1.24521	1.7981e-28	-0.984818	1.93147e-11	methylcrotonoyl-CoA carboxylase 1 [Source:HGNC Symbol;Acc:HGNC:6936]
LAMP3	ENSG00000078081	4.51197	0.0959136	0.683866	0.280723	0.414916	-0.0888955	0.804032	-2.03166	1.20442e-19	-1.84685	2.12183e-10	-2.21647	1.84631e-11	-2.12758	2.45364e-16	-1.93575	3.87879e-08	lysosomal associated membrane protein 3 [Source:HGNC Symbol;Acc:HGNC:14582]
FAP	ENSG00000078098	5.43305	-0.763879	2.95632e-07	-0.959815	5.68287e-06	-0.567942	0.0100807	0.286336	0.0531332	0.0903995	0.719061	0.482272	0.0209368	1.05021	1.42832e-09	-0.477543	0.0511155	fibroblast activation protein alpha [Source:HGNC Symbol;Acc:HGNC:3590]
NEBL	ENSG00000078114	7.08053	-0.174171	0.255714	-0.191877	0.414359	-0.156465	0.504196	0.658674	4.29375e-06	0.640968	0.00292677	0.67638	0.000783807	0.832846	7.99645e-07	0.484503	0.0441428	nebulette [Source:HGNC Symbol;Acc:HGNC:16932]
ACER3	ENSG00000078124	5.3023	-0.626602	4.05269e-08	-0.640013	8.82006e-05	-0.613191	0.000252129	-0.517065	3.35411e-06	-0.530476	0.000929265	-0.503654	0.00204287	0.109538	0.421166	-1.14367	9.87674e-10	alkaline ceramidase 3 [Source:HGNC Symbol;Acc:HGNC:16066]
UBE2K	ENSG00000078140	6.80891	0.118183	0.103414	-0.0204694	0.873338	0.256835	0.0118322	0.40746	4.42175e-09	0.268808	0.00925406	0.546112	2.07401e-08	0.289277	0.000347203	0.525643	4.11014e-06	ubiquitin conjugating enzyme E2 K [Source:HGNC Symbol;Acc:HGNC:4914]
PIK3C3	ENSG00000078142	5.4034	-0.247437	0.000473221	-0.271968	0.00917299	-0.222906	0.0342787	0.317852	4.73146e-06	0.293321	0.00464359	0.342383	0.000527689	0.565289	9.97693e-12	0.0704148	0.579767	phosphatidylinositol 3-kinase catalytic subunit type 3 [Source:HGNC Symbol;Acc:HGNC:8974]
N4BP2	ENSG00000078177	4.49476	-0.490694	5.55159e-05	-0.555587	0.00163392	-0.4258	0.0188275	0.613859	3.06758e-07	0.548965	0.00219032	0.678753	5.23237e-05	1.10455	2.89653e-14	0.123166	0.572487	NEDD4 binding protein 2 [Source:HGNC Symbol;Acc:HGNC:29851]
TIGAR	ENSG00000078237	3.60676	-0.324655	0.000370818	-0.266313	0.0511807	-0.382996	0.0044199	-0.69947	2.38264e-14	-0.641129	4.89008e-07	-0.757812	1.00266e-08	-0.374816	0.000349017	-1.02412	1.23937e-11	TP53 induced glycolysis regulatory phosphatase [Source:HGNC Symbol;Acc:HGNC:1185]
TULP3	ENSG00000078246	5.17829	0.0541512	0.512188	0.145433	0.221228	-0.0371306	0.771527	-0.657386	1.00882e-17	-0.566104	8.4643e-08	-0.748668	1.03544e-11	-0.711537	2.23648e-15	-0.603235	8.31906e-07	TUB like protein 3 [Source:HGNC Symbol;Acc:HGNC:12425]
SYNJ2	ENSG00000078269	5.65636	-0.079028	0.440487	-0.0681248	0.673876	-0.0899312	0.557859	0.380721	4.11943e-05	0.391624	0.00484331	0.369817	0.005378	0.459749	2.44458e-05	0.301692	0.0541736	synaptojanin 2 [Source:HGNC Symbol;Acc:HGNC:11504]
ADCY2	ENSG00000078295	3.68863	-0.137431	0.644336	-0.106942	0.822558	-0.167919	0.708591	-1.01017	0.00013434	-0.979678	0.00959399	-1.04066	0.00867149	-0.872736	0.00477265	-1.1476	0.00914968	adenylate cyclase 2 [Source:HGNC Symbol;Acc:HGNC:233]
PPP2R5C	ENSG00000078304	7.05317	-0.25297	2.71619e-05	-0.261735	0.00307573	-0.244205	0.00589211	-0.199063	0.000784297	-0.207828	0.0176542	-0.190297	0.0291708	0.0539077	0.45892	-0.452033	3.76353e-06	protein phosphatase 2 regulatory subunit B'gamma [Source:HGNC Symbol;Acc:HGNC:9311]
PMS2P1	ENSG00000078319	3.44854	0.225795	0.001395	0.0852483	0.461708	0.366342	0.000276996	0.0507818	0.495089	-0.0897651	0.421996	0.191329	0.05925	-0.175013	0.0322118	0.276577	0.0167654	PMS1 homolog 2, mismatch repair system component pseudogene 1 [Source:HGNC Symbol;Acc:HGNC:9123]
GNB1	ENSG00000078369	8.84004	0.065031	0.358155	-0.0741672	0.495767	0.204229	0.0352369	-0.0890821	0.18599	-0.22828	0.017299	0.0501161	0.631289	-0.154113	0.0446939	-0.024051	0.848299	G protein subunit beta 1 [Source:HGNC Symbol;Acc:HGNC:4396]
HOXA9	ENSG00000078399	1.87771	0.393968	0.150949	0.0267125	0.957994	0.761225	0.0468906	-0.735071	0.00492569	-1.10233	0.00292983	-0.367815	0.363818	-1.12904	0.000228035	-0.341103	0.46242	homeobox A9 [Source:HGNC Symbol;Acc:HGNC:5109]
EDN1	ENSG00000078401	4.11591	-0.0390325	0.857906	0.289978	0.334671	-0.368043	0.19914	-0.7801	2.04433e-05	-0.451089	0.100615	-1.10911	4.96935e-05	-0.741067	0.000547113	-0.819132	0.00712854	endothelin 1 [Source:HGNC Symbol;Acc:HGNC:3176]
MLLT10	ENSG00000078403	5.28608	-0.0528028	0.571106	0.188786	0.151177	-0.294391	0.0187172	-0.448555	6.67752e-08	-0.206966	0.0997662	-0.690143	1.54244e-08	-0.395752	4.57478e-05	-0.501358	0.000248864	MLLT10 histone lysine methyltransferase DOT1L cofactor [Source:HGNC Symbol;Acc:HGNC:16063]
ZCWPW1	ENSG00000078487	2.76479	0.0933619	0.403406	-0.115252	0.499048	0.301975	0.0473462	0.101849	0.342667	-0.106764	0.523544	0.310463	0.0356517	0.00848732	0.948891	0.195211	0.271475	zinc finger CW-type and PWWP domain containing 1 [Source:HGNC Symbol;Acc:HGNC:23486]
ADCYAP1R1	ENSG00000078549	1.38153	-0.0251699	0.92676	0.749123	0.035121	-0.799463	0.0214816	-0.297651	0.203494	0.476642	0.180338	-1.07194	0.00155233	-0.272481	0.318055	-0.322821	0.42172	ADCYAP receptor type I [Source:HGNC Symbol;Acc:HGNC:242]
FGF20	ENSG00000078579	-2.90373	-0.43993	0.127902	0.535078	0.215859	-1.41494	0.000351804	1.38748	2.22484e-07	2.36249	1.21784e-08	0.412475	0.302378	1.82741	2.71627e-09	0.947553	0.0353911	fibroblast growth factor 20 [Source:HGNC Symbol;Acc:HGNC:3677]
P2RY10	ENSG00000078589	1.67911	-0.497676	0.0398202	-0.603196	0.0899995	-0.392155	0.291322	-0.00668341	0.980985	-0.112204	0.78273	0.0988373	0.798142	0.490992	0.0763744	-0.504359	0.21057	P2Y receptor family member 10 [Source:HGNC Symbol;Acc:HGNC:19906]
ITM2A	ENSG00000078596	4.37742	-0.632381	0.000237995	-0.547443	0.0308121	-0.717319	0.00521788	0.311124	0.0707942	0.396063	0.131771	0.226186	0.382195	0.943505	2.16819e-06	-0.321257	0.274037	integral membrane protein 2A [Source:HGNC Symbol;Acc:HGNC:6173]
NRDC	ENSG00000078618	7.48639	0.0646973	0.257022	-0.0548231	0.543261	0.184218	0.0197889	-0.410849	3.60369e-14	-0.53037	4.60489e-12	-0.291329	0.000154689	-0.475547	9.89282e-14	-0.346152	7.83815e-05	nardilysin convertase [Source:HGNC Symbol;Acc:HGNC:7995]
VDAC3	ENSG00000078668	7.0614	0.502238	8.71168e-06	0.258823	0.140517	0.745653	3.13319e-06	-0.324714	0.00345579	-0.568129	0.00034708	-0.0812987	0.649814	-0.826952	3.52797e-10	0.177524	0.363933	voltage dependent anion channel 3 [Source:HGNC Symbol;Acc:HGNC:12674]
PCM1	ENSG00000078674	7.46396	-0.671405	2.29128e-12	-0.37838	0.00570189	-0.964431	1.67538e-11	0.613011	4.41151e-11	0.906036	7.49583e-11	0.319985	0.0155018	1.28442	1.91934e-27	-0.0583946	0.735492	pericentriolar material 1 [Source:HGNC Symbol;Acc:HGNC:8727]
TNRC6C	ENSG00000078687	5.2451	-0.238509	0.0172012	-0.406347	0.00497488	-0.0706701	0.668185	0.771093	1.15915e-14	0.603255	2.98823e-05	0.938932	7.47215e-12	1.0096	2.73429e-17	0.532585	0.000929114	trinucleotide repeat containing adaptor 6C [Source:HGNC Symbol;Acc:HGNC:29318]
CBFA2T2	ENSG00000078699	5.55889	-0.0509589	0.513726	-0.114802	0.310085	0.0128844	0.917761	0.0100759	0.901355	-0.0537675	0.649448	0.0739192	0.501294	0.0610348	0.477903	-0.0408831	0.75717	CBFA2/RUNX1 partner transcriptional co-repressor 2 [Source:HGNC Symbol;Acc:HGNC:1536]
BRINP1	ENSG00000078725	1.95232	0.490385	0.159608	-0.114998	0.848254	1.09577	0.0221345	-0.751779	0.0243814	-1.35716	0.00382589	-0.146396	0.788844	-1.24216	0.00144005	-0.261394	0.668285	BMP/retinoic acid inducible neural specific 1 [Source:HGNC Symbol;Acc:HGNC:2687]
ITCH	ENSG00000078747	6.23611	-0.368498	7.11858e-07	-0.441508	3.94253e-05	-0.295488	0.00686934	-0.0274892	0.735099	-0.100499	0.389825	0.045521	0.700963	0.341009	6.4276e-05	-0.395987	0.00100328	itchy E3 ubiquitin protein ligase [Source:HGNC Symbol;Acc:HGNC:13890]
PKD2L2	ENSG00000078795	-1.60599	-1.07517	2.05474e-07	-0.902986	0.00227089	-1.24735	5.39108e-05	0.742283	0.000232658	0.914463	0.00259096	0.570103	0.0513421	1.81745	1.76718e-13	-0.332884	0.34728	polycystin 2 like 2, transient receptor potential cation channel [Source:HGNC Symbol;Acc:HGNC:9012]
TP53INP2	ENSG00000078804	5.69204	-0.691853	3.85039e-08	-1.09403	9.98261e-10	-0.289675	0.126677	-0.360129	0.00340173	-0.762307	1.17946e-05	0.0420495	0.837118	0.331724	0.0215694	-1.05198	2.57065e-07	tumor protein p53 inducible nuclear protein 2 [Source:HGNC Symbol;Acc:HGNC:16104]
SDF4	ENSG00000078808	7.12767	0.472851	5.50756e-07	0.595305	2.5065e-05	0.350397	0.00994375	-0.0157366	0.882909	0.106717	0.48186	-0.138191	0.333658	-0.488587	6.5829e-06	0.457114	0.00284968	stromal cell derived factor 4 [Source:HGNC Symbol;Acc:HGNC:24188]
MYH7B	ENSG00000078814	0.672007	-0.00452923	0.982721	-0.190023	0.497924	0.180965	0.506502	0.0877639	0.63392	-0.0977303	0.736126	0.273258	0.282945	0.0922931	0.660812	0.0832346	0.795099	myosin heavy chain 7B [Source:HGNC Symbol;Acc:HGNC:15906]
BPIFB2	ENSG00000078898	4.43354	-3.90811	4.38182e-12	-5.14558	4.44593e-12	-2.67063	0.000685168	1.18744	0.0136396	-0.0500426	0.95348	2.42491	0.000232126	5.09554	3.20243e-14	-2.72067	0.000917118	BPI fold containing family B member 2 [Source:HGNC Symbol;Acc:HGNC:16177]
TP73	ENSG00000078900	2.47275	0.250865	0.214315	-0.109684	0.743588	0.611414	0.0283368	0.341237	0.0782623	-0.0193122	0.955858	0.701786	0.00913441	0.090372	0.704507	0.592102	0.0649817	tumor protein p73 [Source:HGNC Symbol;Acc:HGNC:12003]
TOLLIP	ENSG00000078902	5.98678	0.339441	9.2059e-05	0.325538	0.0129306	0.353345	0.00467161	0.385904	5.90286e-06	0.372001	0.00345676	0.399808	0.000957827	0.0464632	0.663502	0.725346	2.9932e-07	toll interacting protein [Source:HGNC Symbol;Acc:HGNC:16476]
UBE2D4	ENSG00000078967	4.72869	0.0795551	0.302533	-0.00708171	0.959505	0.166192	0.126677	-0.0369111	0.637832	-0.123548	0.269631	0.0497257	0.666551	-0.116466	0.173449	0.042644	0.751604	ubiquitin conjugating enzyme E2 D4 (putative) [Source:HGNC Symbol;Acc:HGNC:21647]
CLUL1	ENSG00000079101	2.37125	0.196423	0.378922	0.240699	0.485668	0.152146	0.657456	0.450963	0.0297728	0.495239	0.121071	0.406686	0.181027	0.25454	0.303809	0.647386	0.0617038	clusterin like 1 [Source:HGNC Symbol;Acc:HGNC:2096]
RUNX1T1	ENSG00000079102	2.88308	-1.46066	5.34322e-16	-1.71725	2.08174e-12	-1.20408	3.26293e-06	0.0629516	0.734712	-0.193632	0.473884	0.319535	0.200145	1.52361	9.19023e-14	-1.39771	5.76006e-07	RUNX1 partner transcriptional co-repressor 1 [Source:HGNC Symbol;Acc:HGNC:1535]
CDH17	ENSG00000079112	-1.16479	0.0294135	0.913304	0.212819	0.574389	-0.153992	0.685621	-0.283374	0.218924	-0.0999684	0.795658	-0.46678	0.169923	-0.312788	0.237428	-0.25396	0.528719	cadherin 17 [Source:HGNC Symbol;Acc:HGNC:1756]
THOC1	ENSG00000079134	5.12094	0.178893	0.031698	0.374761	0.0022213	-0.0169738	0.905271	-0.194427	0.0166231	0.00144004	0.992565	-0.390294	0.000869458	-0.373321	7.33857e-05	-0.0155337	0.922695	THO complex 1 [Source:HGNC Symbol;Acc:HGNC:19070]
FKBP7	ENSG00000079150	3.89881	-0.333084	0.000231834	-0.212853	0.123486	-0.453316	0.00066375	-0.322816	0.000276287	-0.202584	0.135472	-0.443047	0.000635411	0.0102683	0.929348	-0.6559	7.81645e-06	FKBP prolyl isomerase 7 [Source:HGNC Symbol;Acc:HGNC:3723]
OSBPL6	ENSG00000079156	3.45606	-0.26003	0.13074	-0.899083	0.000163261	0.379022	0.12493	0.947395	1.02832e-08	0.308342	0.232363	1.58645	4.41704e-12	1.20743	7.14842e-10	0.687365	0.0117692	oxysterol binding protein like 6 [Source:HGNC Symbol;Acc:HGNC:16388]
SLC1A3	ENSG00000079215	4.42962	-0.65963	3.21009e-06	-0.536491	0.00937001	-0.782769	0.000198602	-0.902964	1.41891e-10	-0.779826	7.64609e-05	-1.0261	6.89818e-07	-0.243334	0.141634	-1.56259	3.87685e-11	solute carrier family 1 member 3 [Source:HGNC Symbol;Acc:HGNC:10941]
XRCC5	ENSG00000079246	8.66822	-0.151365	0.0164364	-0.259022	0.00467691	-0.0437073	0.674615	-0.12957	0.0371479	-0.237227	0.0083104	-0.0219122	0.830604	0.021795	0.779352	-0.280934	0.0056898	X-ray repair cross complementing 5 [Source:HGNC Symbol;Acc:HGNC:12833]
LXN	ENSG00000079257	4.1513	-0.147634	0.191896	-0.148078	0.396845	-0.147189	0.389326	-0.27004	0.011745	-0.270485	0.0920818	-0.269596	0.090423	-0.122407	0.343631	-0.417674	0.0187086	latexin [Source:HGNC Symbol;Acc:HGNC:13347]
SP140	ENSG00000079263	2.58653	-0.0699902	0.743289	0.0132575	0.971789	-0.153238	0.620799	-0.541576	0.00350651	-0.458329	0.0986812	-0.624824	0.0234659	-0.471586	0.0303806	-0.611566	0.0494865	SP140 nuclear body protein [Source:HGNC Symbol;Acc:HGNC:17133]
MKNK1	ENSG00000079277	4.80977	-0.0116422	0.869047	-0.0745114	0.444451	0.0512269	0.599223	-0.145212	0.0142114	-0.208081	0.0164196	-0.082343	0.365245	-0.13357	0.0545961	-0.156854	0.116976	MAPK interacting serine/threonine kinase 1 [Source:HGNC Symbol;Acc:HGNC:7110]
TNS1	ENSG00000079308	7.18606	-0.628315	4.62823e-09	-0.478772	0.00189629	-0.777858	9.44724e-07	0.327075	0.00173623	0.476618	0.00222141	0.177532	0.26052	0.95539	3.77976e-14	-0.30124	0.0882411	tensin 1 [Source:HGNC Symbol;Acc:HGNC:11973]
REXO1	ENSG00000079313	4.9058	0.536007	1.01147e-11	0.568139	9.17049e-07	0.503875	4.77681e-06	0.0397783	0.632757	0.0719104	0.570878	0.00764618	0.953654	-0.496229	2.87917e-08	0.575786	4.34418e-06	RNA exonuclease 1 homolog [Source:HGNC Symbol;Acc:HGNC:24616]
SAR1A	ENSG00000079332	7.21332	-0.170552	0.00166341	-0.267156	0.000716586	-0.0739482	0.3855	-0.0330497	0.567268	-0.129653	0.109478	0.063554	0.442871	0.137502	0.0283107	-0.203602	0.0218814	secretion associated Ras related GTPase 1A [Source:HGNC Symbol;Acc:HGNC:10534]
CDC14A	ENSG00000079335	3.43815	-0.0782245	0.64924	-0.284899	0.236008	0.12845	0.608564	1.31749	1.12553e-16	1.11082	1.3833e-06	1.52417	8.21061e-13	1.39572	4.83797e-14	1.23927	1.00517e-06	cell division cycle 14A [Source:HGNC Symbol;Acc:HGNC:1718]
RAPGEF3	ENSG00000079337	3.75723	-0.3907	0.00139999	-0.469137	0.00871216	-0.312264	0.0903851	1.16331	4.70824e-20	1.08487	2.80075e-09	1.24175	2.19575e-13	1.55401	4.03593e-24	0.772609	0.000100253	Rap guanine nucleotide exchange factor 3 [Source:HGNC Symbol;Acc:HGNC:16629]
CEACAM1	ENSG00000079385	5.41966	-0.475252	0.0123143	-0.267856	0.372035	-0.682649	0.0156469	-1.25999	2.80904e-11	-1.0526	5.41922e-05	-1.46739	1.77901e-07	-0.784742	0.00029149	-1.73525	3.03014e-08	CEA cell adhesion molecule 1 [Source:HGNC Symbol;Acc:HGNC:1814]
SENP1	ENSG00000079387	4.92485	-0.274693	0.000196371	-0.330962	0.00212726	-0.218423	0.0475922	-0.108331	0.147458	-0.164601	0.137801	-0.0520618	0.65751	0.166361	0.0524102	-0.383024	0.00138952	SUMO specific peptidase 1 [Source:HGNC Symbol;Acc:HGNC:17927]
DUSP13	ENSG00000079393	-0.704949	0.974979	0.00351606	0.244586	0.671557	1.70537	0.000156578	2.78983	4.57608e-15	2.05944	5.9791e-05	3.52023	3.07407e-14	1.81485	3.07595e-06	3.76481	2.18671e-10	dual specificity phosphatase 13 [Source:HGNC Symbol;Acc:HGNC:19681]
CIC	ENSG00000079432	6.53405	0.127335	0.120292	0.196016	0.109569	0.058653	0.654465	0.190377	0.0153929	0.259059	0.027368	0.121696	0.306207	0.0630428	0.511593	0.317712	0.0143891	capicua transcriptional repressor [Source:HGNC Symbol;Acc:HGNC:14214]
LIPE	ENSG00000079435	4.13903	-0.794476	0.000139245	-0.46527	0.140656	-1.12368	0.000348343	0.817098	6.73746e-05	1.1463	0.000238245	0.487892	0.102252	1.61157	7.88275e-11	0.0226216	0.955686	lipase E, hormone sensitive type [Source:HGNC Symbol;Acc:HGNC:6621]
FDFT1	ENSG00000079459	7.14059	-0.123039	0.30309	-0.344296	0.0401681	0.0982182	0.590981	-0.0603963	0.61748	-0.281653	0.0914449	0.160861	0.342466	0.0626426	0.6506	-0.183435	0.346557	farnesyl-diphosphate farnesyltransferase 1 [Source:HGNC Symbol;Acc:HGNC:3629]
PAFAH1B3	ENSG00000079462	6.05197	0.66519	6.15691e-08	0.456113	0.0135611	0.874267	4.19803e-07	0.462086	0.00011336	0.253009	0.17638	0.671163	6.49671e-05	-0.203104	0.155622	1.12728	1.98867e-08	platelet activating factor acetylhydrolase 1b catalytic subunit 3 [Source:HGNC Symbol;Acc:HGNC:8576]
OPHN1	ENSG00000079482	4.33729	-0.238708	0.0930925	-0.266546	0.213798	-0.21087	0.329271	-0.225649	0.104784	-0.253487	0.227675	-0.197811	0.347339	0.0130587	0.940988	-0.464357	0.0417909	oligophrenin 1 [Source:HGNC Symbol;Acc:HGNC:8148]
KIF22	ENSG00000079616	6.34152	0.634277	1.65533e-12	0.382499	0.00360363	0.886054	2.47513e-12	8.62775e-05	0.999536	-0.251691	0.0502308	0.251864	0.0445518	-0.634191	5.41894e-10	0.634363	8.24684e-06	kinesin family member 22 [Source:HGNC Symbol;Acc:HGNC:6391]
SCGN	ENSG00000079689	1.51422	1.6479	0.000944997	1.77676	0.0233848	1.51903	0.0272482	0.805099	0.0999053	0.933962	0.224825	0.676236	0.344185	-0.842798	0.138128	2.453	0.00301054	secretagogin, EF-hand calcium binding protein [Source:HGNC Symbol;Acc:HGNC:16941]
CARMIL1	ENSG00000079691	5.42635	-0.411668	1.52204e-05	-0.454364	0.00100199	-0.368972	0.00878483	-0.534794	1.22006e-08	-0.57749	1.47934e-05	-0.492097	0.000312331	-0.123126	0.275726	-0.946461	1.48989e-09	capping protein regulator and myosin 1 linker 1 [Source:HGNC Symbol;Acc:HGNC:21581]
PGM1	ENSG00000079739	6.35928	-0.0147806	0.901671	0.16772	0.294891	-0.197281	0.198326	-1.0927	4.69489e-25	-0.9102	8.04694e-11	-1.2752	6.03308e-17	-1.07792	7.28111e-19	-1.10748	2.48929e-11	phosphoglucomutase 1 [Source:HGNC Symbol;Acc:HGNC:8905]
DDX1	ENSG00000079785	7.13577	-0.0454053	0.541264	-0.123201	0.244509	0.0323899	0.776712	-0.344796	1.94867e-07	-0.422592	8.36148e-06	-0.267001	0.00578575	-0.299391	0.00011224	-0.390202	0.000356129	DEAD-box helicase 1 [Source:HGNC Symbol;Acc:HGNC:2734]
DNM2	ENSG00000079805	7.15833	0.163499	0.0136509	0.0147167	0.904007	0.312281	0.000897012	-0.281777	1.16157e-05	-0.43056	3.00332e-06	-0.132995	0.171864	-0.445276	4.92266e-09	-0.118279	0.293439	dynamin 2 [Source:HGNC Symbol;Acc:HGNC:2974]
EPB41L2	ENSG00000079819	6.24444	-0.452495	0.000114207	-0.0729349	0.718799	-0.832055	2.17329e-06	-0.778147	2.81231e-11	-0.398587	0.018495	-1.15771	3.03653e-11	-0.325652	0.0161765	-1.23064	2.45533e-10	erythrocyte membrane protein band 4.1 like 2 [Source:HGNC Symbol;Acc:HGNC:3379]
RIMS1	ENSG00000079841	1.73795	-1.15416	0.000273321	-0.850188	0.0675558	-1.45813	0.00254075	1.63003	2.72182e-07	1.934	7.53078e-05	1.32606	0.0020848	2.78419	1.24057e-12	0.475869	0.382762	regulating synaptic membrane exocytosis 1 [Source:HGNC Symbol;Acc:HGNC:17282]
MOXD1	ENSG00000079931	3.9414	-0.40322	0.0391455	-0.336997	0.260514	-0.469444	0.108612	-1.17702	8.85831e-10	-1.1108	2.95424e-05	-1.24325	1.17341e-05	-0.773804	0.000470598	-1.58024	6.33892e-07	monooxygenase DBH like 1 [Source:HGNC Symbol;Acc:HGNC:21063]
STX7	ENSG00000079950	6.01643	-0.321602	3.18986e-07	-0.289796	0.00156948	-0.353409	0.000120485	-0.233523	0.00014855	-0.201717	0.0274993	-0.265329	0.00313782	0.0880794	0.235769	-0.555125	5.68989e-08	syntaxin 7 [Source:HGNC Symbol;Acc:HGNC:11442]
RABL2B	ENSG00000079974	4.20914	0.0748266	0.381446	-0.012446	0.934313	0.162099	0.177645	0.0777018	0.346263	-0.00957078	0.947116	0.164974	0.157962	0.00287519	0.97713	0.152528	0.262719	RAB, member of RAS oncogene family like 2B [Source:HGNC Symbol;Acc:HGNC:9800]
KEAP1	ENSG00000079999	6.41	0.39795	6.15926e-06	0.46593	0.000397202	0.32997	0.00940307	0.139373	0.116278	0.207353	0.120269	0.0713927	0.605067	-0.258577	0.0107966	0.537323	0.000166331	kelch like ECH associated protein 1 [Source:HGNC Symbol;Acc:HGNC:23177]
DDX43	ENSG00000080007	0.195588	-0.2364	0.462304	0.211999	0.677372	-0.6848	0.136955	-1.63804	4.66432e-08	-1.18964	0.00420402	-2.08644	5.30459e-06	-1.40164	4.97483e-05	-1.87444	0.000148844	DEAD-box helicase 43 [Source:HGNC Symbol;Acc:HGNC:18677]
PTPRH	ENSG00000080031	0.823896	-0.1992	0.458137	-0.473937	0.21493	0.075537	0.858529	0.700332	0.0042846	0.425595	0.273205	0.97507	0.00443543	0.899533	0.00169774	0.501132	0.234845	protein tyrosine phosphatase receptor type H [Source:HGNC Symbol;Acc:HGNC:9672]
DCT	ENSG00000080166	-0.132429	2.2421	4.22938e-09	2.38064	5.33437e-05	2.10355	2.62626e-05	0.410852	0.264088	0.549393	0.34082	0.272311	0.624248	-1.83124	1.4426e-05	2.65295	1.61701e-05	dopachrome tautomerase [Source:HGNC Symbol;Acc:HGNC:2709]
SLC35C2	ENSG00000080189	6.11996	0.414644	6.97433e-09	0.29291	0.00588189	0.536377	1.28738e-07	-0.169008	0.0162915	-0.290742	0.00427166	-0.0472751	0.676152	-0.583652	2.60043e-12	0.245635	0.0358324	solute carrier family 35 member C2 [Source:HGNC Symbol;Acc:HGNC:17117]
CRYBG3	ENSG00000080200	4.27011	-1.23606	1.92674e-11	-1.45957	9.57079e-09	-1.01255	0.000163222	-0.420363	0.0175642	-0.643872	0.0114261	-0.196853	0.476795	0.815698	7.60786e-05	-1.65642	2.44973e-08	crystallin beta-gamma domain containing 3 [Source:HGNC Symbol;Acc:HGNC:34427]
EPHA6	ENSG00000080224	-0.505533	-0.589522	0.0766153	-2.53886	4.31943e-08	1.35982	0.0029256	0.205366	0.548169	-1.74397	9.63462e-05	2.15471	1.17048e-06	0.794888	0.0368336	-0.384156	0.501556	EPH receptor A6 [Source:HGNC Symbol;Acc:HGNC:19296]
SCTR	ENSG00000080293	-2.62617	-0.67765	0.00398772	-0.490466	0.168885	-0.864835	0.0141929	-0.0235971	0.928821	0.163587	0.672328	-0.210782	0.573767	0.654053	0.0152187	-0.701247	0.0716465	secretin receptor [Source:HGNC Symbol;Acc:HGNC:10608]
RFX3	ENSG00000080298	4.09064	-0.0939836	0.486735	0.237923	0.224987	-0.42589	0.0211842	0.0256464	0.853947	0.357553	0.0542939	-0.30626	0.0931834	0.11963	0.421525	-0.0683371	0.766319	regulatory factor X3 [Source:HGNC Symbol;Acc:HGNC:9984]
RIF1	ENSG00000080345	6.4676	-0.422631	1.58324e-06	-0.371601	0.00383721	-0.473661	0.000247976	-0.308198	0.000354389	-0.257168	0.0457951	-0.359228	0.00448374	0.114433	0.27285	-0.730829	3.29435e-07	replication timing regulatory factor 1 [Source:HGNC Symbol;Acc:HGNC:23207]
RAB21	ENSG00000080371	6.25392	-0.170733	0.0116016	-0.330642	0.000700169	-0.0108249	0.926983	0.392296	3.06339e-09	0.232387	0.0187118	0.552204	2.87224e-09	0.563029	9.70032e-13	0.221562	0.045433	RAB21, member RAS oncogene family [Source:HGNC Symbol;Acc:HGNC:18263]
SLC4A4	ENSG00000080493	2.84338	-3.22161	1.51927e-20	-2.75375	9.82132e-11	-3.68947	2.44169e-12	0.441691	0.140682	0.909549	0.0434209	-0.0261671	0.958571	3.6633	2.18793e-20	-2.77992	5.16755e-08	solute carrier family 4 member 4 [Source:HGNC Symbol;Acc:HGNC:11030]
SMARCA2	ENSG00000080503	7.29981	-0.234683	0.00701151	-0.100354	0.478228	-0.369012	0.0037492	0.163139	0.0594873	0.297468	0.0199452	0.0288097	0.839048	0.397822	6.29746e-05	-0.0715442	0.648446	SWI/SNF related, matrix associated, actin dependent regulator of chromatin, subfamily a, member 2 [Source:HGNC Symbol;Acc:HGNC:11098]
SESN1	ENSG00000080546	4.83715	-0.615001	6.2654e-10	-0.80445	1.20604e-08	-0.425551	0.00330448	0.581657	2.1417e-09	0.392208	0.00661562	0.771107	1.22462e-08	1.19666	7.5782e-23	-0.0333432	0.858931	sestrin 1 [Source:HGNC Symbol;Acc:HGNC:21595]
MID2	ENSG00000080561	3.69298	-0.515097	2.5174e-06	-0.489509	0.00205158	-0.540684	0.000806836	0.242881	0.0253343	0.268468	0.104885	0.217293	0.175568	0.757977	2.69767e-09	-0.272216	0.137688	midline 2 [Source:HGNC Symbol;Acc:HGNC:7096]
COL5A3	ENSG00000080573	5.83421	0.221471	0.240201	0.763623	0.00530127	-0.320681	0.249422	-0.251815	0.167192	0.290337	0.303049	-0.793967	0.00244799	-0.473286	0.0227261	-0.0303445	0.931005	collagen type V alpha 3 chain [Source:HGNC Symbol;Acc:HGNC:14864]
SRCAP	ENSG00000080603	7.67764	-0.0822482	0.213767	-0.211931	0.0242408	0.0474348	0.649533	0.243532	8.45227e-05	0.113849	0.24385	0.373215	2.08851e-05	0.325781	7.46749e-06	0.161284	0.127838	Snf2 related CREBBP activator protein [Source:HGNC Symbol;Acc:HGNC:16974]
PUM3	ENSG00000080608	5.64267	0.232289	0.00473735	0.351312	0.0041332	0.113265	0.374725	-1.09637	3.16487e-34	-0.97735	4.88839e-17	-1.2154	7.13076e-22	-1.32866	2.46547e-35	-0.864085	1.42905e-10	pumilio RNA binding family member 3 [Source:HGNC Symbol;Acc:HGNC:29676]
CPB2	ENSG00000080618	-0.42693	-1.74087	3.4473e-06	-4.53911	2.49044e-16	1.05737	0.0443499	-1.37969	0.000155765	-4.17793	2.49878e-15	1.41855	0.00499816	0.361183	0.417583	-3.12057	6.28956e-07	carboxypeptidase B2 [Source:HGNC Symbol;Acc:HGNC:2300]
CHRNA3	ENSG00000080644	-0.484986	0.640225	0.00664553	-0.7369	0.0320331	2.01735	1.36407e-09	-0.643042	0.00534713	-2.02017	5.13684e-10	0.734083	0.0251256	-1.28327	2.84693e-06	-0.00281727	0.995261	cholinergic receptor nicotinic alpha 3 subunit [Source:HGNC Symbol;Acc:HGNC:1957]
KCNN2	ENSG00000080709	0.279085	0.18385	0.17905	-0.318422	0.11011	0.686122	0.000218536	0.340142	0.0087246	-0.16213	0.435099	0.842414	2.87906e-06	0.156292	0.317116	0.523992	0.0147731	potassium calcium-activated channel subfamily N member 2 [Source:HGNC Symbol;Acc:HGNC:6291]
CNOT4	ENSG00000080802	4.95229	-0.217455	0.000275291	-0.20827	0.0190734	-0.226639	0.0100828	-0.0775355	0.203814	-0.0683512	0.475301	-0.0867197	0.339319	0.139919	0.0438338	-0.29499	0.00239466	CCR4-NOT transcription complex subunit 4 [Source:HGNC Symbol;Acc:HGNC:7880]
PSEN1	ENSG00000080815	6.66847	-0.275889	2.88834e-06	-0.340499	7.03789e-05	-0.211279	0.0152327	0.280159	1.29684e-06	0.21555	0.0128318	0.344769	2.61497e-05	0.556048	2.23651e-15	0.00427056	0.970616	presenilin 1 [Source:HGNC Symbol;Acc:HGNC:9508]
CPOX	ENSG00000080819	4.13217	-0.106223	0.180267	-0.0575503	0.657511	-0.154896	0.181737	-0.504514	2.34934e-11	-0.455841	1.97659e-05	-0.553187	3.8505e-07	-0.398291	5.31365e-06	-0.610738	7.45657e-07	coproporphyrinogen oxidase [Source:HGNC Symbol;Acc:HGNC:2321]
CLDND1	ENSG00000080822	5.81758	-0.0201395	0.810102	0.00881869	0.949173	-0.0490977	0.685433	-0.199079	0.00535038	-0.170121	0.116714	-0.228037	0.02974	-0.178939	0.0330507	-0.219218	0.0684052	claudin domain containing 1 [Source:HGNC Symbol;Acc:HGNC:1322]
MOK	ENSG00000080823	4.10336	-0.201544	0.245887	-0.181829	0.502234	-0.221259	0.397681	-0.444228	0.00649549	-0.424513	0.0806146	-0.463943	0.0560841	-0.242684	0.213476	-0.645772	0.0173193	MOK protein kinase [Source:HGNC Symbol;Acc:HGNC:9833]
HSP90AA1	ENSG00000080824	10.7043	-0.026606	0.820135	-0.378958	0.0108996	0.325746	0.0271351	-0.378724	0.000136569	-0.731076	2.23975e-07	-0.0263715	0.876113	-0.352118	0.00249876	-0.40533	0.0144249	heat shock protein 90 alpha family class A member 1 [Source:HGNC Symbol;Acc:HGNC:5253]
RBL1	ENSG00000080839	4.39402	0.0700781	0.483863	0.0677468	0.66729	0.0724094	0.630614	-0.764421	2.06246e-16	-0.766752	2.28921e-09	-0.762089	1.02009e-08	-0.834499	1.91841e-14	-0.694342	3.13794e-06	RB transcriptional corepressor like 1 [Source:HGNC Symbol;Acc:HGNC:9893]
DLGAP4	ENSG00000080845	6.88943	0.26089	0.000135932	0.113947	0.297139	0.407833	3.00541e-05	-0.339876	4.18535e-07	-0.486819	3.97422e-07	-0.192933	0.0525484	-0.600766	1.04691e-13	-0.0789854	0.515735	DLG associated protein 4 [Source:HGNC Symbol;Acc:HGNC:24476]
IGSF9B	ENSG00000080854	1.16316	0.0387835	0.896257	-0.303262	0.452497	0.380829	0.317232	1.4958	2.97586e-09	1.15375	0.002229	1.83784	6.26021e-08	1.45701	6.52061e-07	1.53458	0.000195498	immunoglobulin superfamily member 9B [Source:HGNC Symbol;Acc:HGNC:32326]
CROCCP3	ENSG00000080947	1.62668	-0.272555	0.025572	-0.377628	0.0348134	-0.167482	0.376749	0.432982	0.000248849	0.327909	0.0699721	0.538055	0.00130136	0.705537	4.09053e-07	0.160427	0.447705	CROCC pseudogene 3 [Source:HGNC Symbol;Acc:HGNC:29405]
NDC80	ENSG00000080986	4.62675	0.643482	2.27024e-07	0.642068	0.000558289	0.644896	0.000233139	-1.53413	5.83741e-30	-1.53554	2.39466e-18	-1.53271	6.69233e-16	-2.17761	2.57342e-38	-0.890646	9.22646e-06	NDC80 kinetochore complex component [Source:HGNC Symbol;Acc:HGNC:16909]
AP4E1	ENSG00000081014	4.18989	-0.290222	0.000455334	-0.33934	0.00515302	-0.241105	0.0516628	0.2109	0.0100278	0.161782	0.204348	0.260017	0.0273775	0.501122	1.67811e-07	-0.0793228	0.595465	adaptor related protein complex 4 subunit epsilon 1 [Source:HGNC Symbol;Acc:HGNC:573]
RSBN1	ENSG00000081019	4.98252	-0.125365	0.175137	0.10401	0.477043	-0.354739	0.00676886	0.0721674	0.436824	0.301542	0.0216327	-0.157207	0.237457	0.197532	0.0554103	-0.0531971	0.746233	round spermatid basic protein 1 [Source:HGNC Symbol;Acc:HGNC:25642]
MAGI3	ENSG00000081026	5.63055	-0.510356	3.24628e-05	-0.686235	0.000103126	-0.334477	0.0706062	0.61212	4.18535e-07	0.436241	0.0166408	0.787999	3.01256e-06	1.12248	2.01214e-14	0.101764	0.647888	membrane associated guanylate kinase, WW and PDZ domain containing 3 [Source:HGNC Symbol;Acc:HGNC:29647]
CXCL2	ENSG00000081041	1.74025	-0.901363	0.00059299	-0.535372	0.178366	-1.26735	0.00147072	-0.656525	0.0110663	-0.290533	0.482128	-1.02252	0.0081344	0.244838	0.433982	-1.55789	0.000292202	C-X-C motif chemokine ligand 2 [Source:HGNC Symbol;Acc:HGNC:4603]
AFP	ENSG00000081051	0.752908	-0.273141	0.52703	-2.28327	6.39313e-05	1.73699	0.00182056	2.32854	2.25057e-08	0.318417	0.632128	4.33867	8.30988e-14	2.60168	1.09847e-07	2.0554	0.00213942	alpha fetoprotein [Source:HGNC Symbol;Acc:HGNC:317]
COL4A4	ENSG00000081052	2.20573	-0.551831	0.00267336	-0.607382	0.02372	-0.49628	0.0738345	-1.59825	3.84874e-17	-1.6538	6.75727e-11	-1.5427	2.02972e-08	-1.04642	8.31405e-07	-2.15008	5.90881e-12	collagen type IV alpha 4 chain [Source:HGNC Symbol;Acc:HGNC:2206]
TCF7	ENSG00000081059	4.50211	-0.134677	0.444792	-0.0350925	0.907705	-0.234261	0.360559	-0.389821	0.0156514	-0.290237	0.241588	-0.489406	0.0402234	-0.255145	0.182878	-0.524498	0.0515069	transcription factor 7 [Source:HGNC Symbol;Acc:HGNC:11639]
OSTM1	ENSG00000081087	4.98275	-0.386781	8.19818e-08	-0.414022	6.9575e-05	-0.35954	0.00064062	-0.0259981	0.74122	-0.0532392	0.65597	0.00124306	0.992001	0.360783	1.28179e-05	-0.412779	0.000390833	osteoclastogenesis associated transmembrane protein 1 [Source:HGNC Symbol;Acc:HGNC:21652]
CDH7	ENSG00000081138	1.01938	-0.783497	0.043252	-1.50116	0.00633853	-0.0658301	0.920718	3.27039	1.38414e-14	2.55272	2.93399e-05	3.98805	2.5764e-13	4.05388	1.50895e-15	2.48689	0.000118616	cadherin 7 [Source:HGNC Symbol;Acc:HGNC:1766]
IMPG2	ENSG00000081148	-0.582814	-0.913004	2.67562e-10	-0.967824	1.79085e-06	-0.858185	5.09611e-05	0.197539	0.170316	0.142719	0.536229	0.252358	0.23008	1.11054	3.20804e-11	-0.715466	0.00195112	interphotoreceptor matrix proteoglycan 2 [Source:HGNC Symbol;Acc:HGNC:18362]
PCNP	ENSG00000081154	6.91039	-0.0603838	0.310132	0.0515088	0.585571	-0.172276	0.0385794	-0.0432357	0.462168	0.0686569	0.443427	-0.155128	0.0567936	0.0171481	0.806976	-0.10362	0.280037	PEST proteolytic signal containing nuclear protein [Source:HGNC Symbol;Acc:HGNC:30023]
EXD2	ENSG00000081177	5.45108	-0.250633	0.000588685	-0.390976	0.000221048	-0.11029	0.332699	0.410656	1.12375e-08	0.270313	0.0116923	0.551	4.75645e-08	0.66129	2.06917e-14	0.160023	0.194743	exonuclease 3'-5' domain containing 2 [Source:HGNC Symbol;Acc:HGNC:20217]
ARG2	ENSG00000081181	1.93539	-0.399082	0.00979672	-0.324158	0.167819	-0.474007	0.0396753	-0.815007	7.27578e-08	-0.740082	0.000577996	-0.889931	6.58043e-05	-0.415925	0.0187593	-1.21409	1.29643e-06	arginase 2 [Source:HGNC Symbol;Acc:HGNC:664]
MEF2C	ENSG00000081189	4.97755	-0.55317	2.66089e-07	-0.248999	0.127499	-0.857341	1.02913e-07	0.00249738	0.984432	0.306669	0.0556749	-0.301674	0.0536661	0.555667	6.74114e-06	-0.550673	0.00155014	myocyte enhancer factor 2C [Source:HGNC Symbol;Acc:HGNC:6996]
PTPRC	ENSG00000081237	6.01786	-0.685526	0.000285028	-0.389578	0.177889	-0.981475	0.000533166	-0.410747	0.0283356	-0.114799	0.717435	-0.706695	0.0103247	0.27478	0.216748	-1.09627	0.000366209	protein tyrosine phosphatase receptor type C [Source:HGNC Symbol;Acc:HGNC:9666]
PKP1	ENSG00000081277	6.35257	1.33176	8.85991e-06	0.985931	0.0317848	1.6776	4.54557e-05	-2.31759	9.1447e-14	-2.66342	8.30497e-11	-1.97176	1.23364e-05	-3.64935	1.73864e-20	-0.985826	0.0434294	plakophilin 1 [Source:HGNC Symbol;Acc:HGNC:9023]
UBA5	ENSG00000081307	5.43903	-0.165549	0.0109492	-0.143192	0.149234	-0.187906	0.0510541	0.0369667	0.592338	0.059324	0.575881	0.0146093	0.893066	0.202516	0.00642193	-0.128582	0.242018	ubiquitin like modifier activating enzyme 5 [Source:HGNC Symbol;Acc:HGNC:23230]
STK17B	ENSG00000081320	5.71028	-0.544456	6.92228e-07	-0.358833	0.0269007	-0.730079	7.3927e-06	-0.500678	3.08942e-06	-0.315055	0.048785	-0.686301	1.32681e-05	0.0437781	0.747263	-1.04513	6.18556e-09	serine/threonine kinase 17b [Source:HGNC Symbol;Acc:HGNC:11396]
CDC14B	ENSG00000081377	3.76321	-0.668688	8.44164e-11	-0.39333	0.00807518	-0.944046	9.29951e-10	-0.602012	1.83035e-09	-0.326654	0.0261117	-0.877369	2.87935e-09	0.0666769	0.588914	-1.2707	7.6501e-14	cell division cycle 14B [Source:HGNC Symbol;Acc:HGNC:1719]
ZNF510	ENSG00000081386	4.00642	-0.543752	1.50077e-11	-0.457446	6.45965e-05	-0.630058	9.12444e-08	0.224128	0.004061	0.310434	0.00750445	0.137822	0.241125	0.76788	4.67668e-16	-0.319624	0.0135178	zinc finger protein 510 [Source:HGNC Symbol;Acc:HGNC:29161]
LRP2	ENSG00000081479	6.85269	0.226927	0.53982	0.847806	0.112317	-0.393951	0.466476	2.89203	5.84762e-15	3.51291	1.13014e-09	2.27116	7.55299e-07	2.66511	1.53068e-10	3.11896	1.40365e-07	LDL receptor related protein 2 [Source:HGNC Symbol;Acc:HGNC:6694]
ZNF506	ENSG00000081665	4.36367	-0.491864	2.48595e-06	-0.413661	0.00677742	-0.570066	0.000212846	0.124758	0.242611	0.202961	0.206986	0.046555	0.783414	0.616621	3.24877e-07	-0.367106	0.0325331	zinc finger protein 506 [Source:HGNC Symbol;Acc:HGNC:23780]
JMJD4	ENSG00000081692	4.99558	0.759721	3.09599e-13	0.897804	5.94478e-09	0.621638	1.53794e-05	-0.50965	2.97565e-07	-0.371567	0.0105978	-0.647733	8.50903e-06	-1.26937	6.50172e-24	0.250071	0.141094	jumonji domain containing 4 [Source:HGNC Symbol;Acc:HGNC:25724]
DUSP12	ENSG00000081721	4.26983	0.255237	0.00104048	0.440733	0.00014567	0.0697401	0.580208	-0.396565	2.07046e-07	-0.211069	0.0655905	-0.582062	1.83022e-07	-0.651802	1.05512e-12	-0.141329	0.289192	dual specificity phosphatase 12 [Source:HGNC Symbol;Acc:HGNC:3067]
AACS	ENSG00000081760	5.81767	-0.0966221	0.364348	-0.527846	0.000245206	0.334602	0.0207315	-0.17866	0.0735402	-0.609884	1.20054e-05	0.252565	0.0782401	-0.0820376	0.495739	-0.275282	0.0975171	acetoacetyl-CoA synthetase [Source:HGNC Symbol;Acc:HGNC:21298]
DELE1	ENSG00000081791	5.69466	-0.143041	0.00804514	-0.143553	0.077048	-0.14253	0.0757244	0.603174	1.29006e-26	0.602663	3.25608e-14	0.603686	1.41978e-15	0.746216	1.80627e-28	0.460133	1.30305e-07	DAP3 binding cell death enhancer 1 [Source:HGNC Symbol;Acc:HGNC:28969]
CADPS2	ENSG00000081803	5.7838	-0.843278	7.18391e-07	-1.15444	1.59874e-06	-0.532116	0.0363006	0.172566	0.321995	-0.138595	0.617327	0.483728	0.0437471	1.01584	2.39651e-07	-0.670711	0.0154683	calcium dependent secretion activator 2 [Source:HGNC Symbol;Acc:HGNC:16018]
PCDHB4	ENSG00000081818	2.19851	-0.247163	0.172562	-0.164869	0.569815	-0.329457	0.22042	0.0880929	0.63859	0.170387	0.550355	0.00579909	0.984539	0.335256	0.0992194	-0.15907	0.613136	protocadherin beta 4 [Source:HGNC Symbol;Acc:HGNC:8689]
PCDHA6	ENSG00000081842	0.463854	-1.24502	0.000205473	-1.739	0.000221504	-0.75103	0.142251	0.740124	0.0249196	0.246137	0.6568	1.23411	0.00705073	1.98514	5.07649e-07	-0.504893	0.379328	protocadherin alpha 6 [Source:HGNC Symbol;Acc:HGNC:8672]
PCDHGA2	ENSG00000081853	1.71881	-1.28437	1.5895e-08	-1.50401	1.86727e-06	-1.06473	0.00154309	0.0311529	0.901917	-0.188484	0.603641	0.25079	0.458854	1.31552	4.309e-07	-1.25322	0.000580405	protocadherin gamma subfamily A, 2 [Source:HGNC Symbol;Acc:HGNC:8700]
HSPB11	ENSG00000081870	4.5901	0.368647	9.41935e-06	0.387416	0.00184521	0.349877	0.00342462	-0.211598	0.0100709	-0.192829	0.121383	-0.230368	0.0573666	-0.580245	1.98367e-09	0.157048	0.269845	heat shock protein family B (small) member 11 [Source:HGNC Symbol;Acc:HGNC:25019]
PHLPP1	ENSG00000081913	4.86632	0.326667	0.00746023	0.229963	0.230574	0.423371	0.0156098	-0.210483	0.08355	-0.307187	0.0862295	-0.113779	0.548013	-0.53715	0.000115689	0.116184	0.594768	PH domain and leucine rich repeat protein phosphatase 1 [Source:HGNC Symbol;Acc:HGNC:20610]
ATP8B1	ENSG00000081923	6.58013	-0.784494	9.28128e-11	-1.07731	2.85085e-10	-0.49168	0.00524471	1.34508	4.1983e-26	1.05227	3.05698e-09	1.63789	4.72362e-22	2.12957	3.77223e-39	0.560586	0.0038291	ATPase phospholipid transporting 8B1 [Source:HGNC Symbol;Acc:HGNC:3706]
IL12RB2	ENSG00000081985	2.41613	0.323101	0.176355	1.04896	0.00263842	-0.402758	0.26069	-3.76253	1.17868e-38	-3.03667	3.03192e-20	-4.48839	1.22922e-25	-4.08563	3.6927e-35	-3.43943	1.62729e-16	interleukin 12 receptor subunit beta 2 [Source:HGNC Symbol;Acc:HGNC:5972]
SMARCD3	ENSG00000082014	4.81019	0.607784	8.05295e-05	0.66761	0.00423091	0.547957	0.0132895	0.174854	0.267498	0.234681	0.332658	0.115028	0.634438	-0.432929	0.0147719	0.782638	0.00182278	SWI/SNF related, matrix associated, actin dependent regulator of chromatin, subfamily d, member 3 [Source:HGNC Symbol;Acc:HGNC:11108]
WDR70	ENSG00000082068	5.06821	-0.0359459	0.594968	-0.0614648	0.54559	-0.0104269	0.922263	-0.193634	0.00126231	-0.219153	0.013148	-0.168115	0.0585923	-0.157688	0.0256759	-0.22958	0.021932	WD repeat domain 70 [Source:HGNC Symbol;Acc:HGNC:25495]
FYB1	ENSG00000082074	5.06951	-0.667818	5.3742e-05	-0.387233	0.122035	-0.948402	0.000127883	-0.467731	0.00404816	-0.187146	0.476306	-0.748315	0.00182385	0.200087	0.307629	-1.13555	2.49772e-05	FYN binding protein 1 [Source:HGNC Symbol;Acc:HGNC:4036]
MPP4	ENSG00000082126	-2.31382	-0.287676	0.107798	-0.409735	0.118709	-0.165617	0.557582	0.00860297	0.966099	-0.113456	0.694388	0.130662	0.634031	0.296279	0.145055	-0.279073	0.352792	membrane palmitoylated protein 4 [Source:HGNC Symbol;Acc:HGNC:13680]
STRADB	ENSG00000082146	4.07235	-0.207359	0.0158736	-0.222576	0.0837062	-0.192142	0.136091	0.255109	0.00231315	0.239892	0.0592177	0.270326	0.0253945	0.462468	2.40365e-06	0.0477501	0.762412	STE20 related adaptor beta [Source:HGNC Symbol;Acc:HGNC:13205]
BZW1	ENSG00000082153	7.50371	-0.367331	2.36917e-05	-0.604175	1.39982e-06	-0.130487	0.337137	0.378165	9.29606e-06	0.14132	0.297764	0.615009	2.98785e-07	0.745496	3.98301e-13	0.0108339	0.948761	basic leucine zipper and W2 domains 1 [Source:HGNC Symbol;Acc:HGNC:18380]
PGR	ENSG00000082175	6.58681	-0.570639	0.0235077	-0.674588	0.0687857	-0.466691	0.224076	5.95666	3.17919e-53	5.85271	2.55465e-29	6.06061	3.03092e-44	6.5273	1.41579e-50	5.38602	3.00987e-25	progesterone receptor [Source:HGNC Symbol;Acc:HGNC:8910]
C1QTNF3	ENSG00000082196	4.06158	-1.09268	1.23147e-08	-1.41896	1.22318e-07	-0.766398	0.00672306	0.566779	0.00231157	0.240497	0.425687	0.893062	0.000581564	1.65946	2.84699e-13	-0.525901	0.0944957	C1q and TNF related 3 [Source:HGNC Symbol;Acc:HGNC:14326]
ME2	ENSG00000082212	5.67161	0.107917	0.293205	0.258169	0.0833137	-0.0423342	0.797502	-0.822057	7.08851e-17	-0.671806	6.87268e-07	-0.972309	1.01485e-11	-0.929975	1.00677e-15	-0.71414	5.60574e-06	malic enzyme 2 [Source:HGNC Symbol;Acc:HGNC:6984]
C5orf22	ENSG00000082213	5.14971	-0.141695	0.0713835	-0.249414	0.0289665	-0.0339766	0.794645	-0.0969298	0.21565	-0.204648	0.0707362	0.0107888	0.932864	0.0447654	0.633281	-0.238625	0.0603986	chromosome 5 open reading frame 22 [Source:HGNC Symbol;Acc:HGNC:25639]
CCNT2	ENSG00000082258	5.47886	-0.414061	2.44184e-09	-0.453054	5.20422e-06	-0.375068	0.000195989	0.150655	0.0276121	0.111662	0.297764	0.189648	0.055008	0.564716	2.81683e-12	-0.263406	0.0194745	cyclin T2 [Source:HGNC Symbol;Acc:HGNC:1600]
FAM135A	ENSG00000082269	3.67411	-0.194152	0.155877	-0.00507512	0.985224	-0.383229	0.0531049	-0.718098	3.34838e-08	-0.529021	0.00477346	-0.907175	2.18668e-06	-0.523946	0.000542666	-0.91225	2.05087e-05	family with sequence similarity 135 member A [Source:HGNC Symbol;Acc:HGNC:21084]
COL19A1	ENSG00000082293	-0.856242	0.102354	0.813742	0.530515	0.373845	-0.325807	0.596016	-1.91354	3.17592e-07	-1.48538	0.00371858	-2.3417	4.78542e-05	-2.01589	3.3702e-06	-1.81118	0.00325041	collagen type XIX alpha 1 chain [Source:HGNC Symbol;Acc:HGNC:2196]
EPB41L3	ENSG00000082397	5.26261	-0.509296	0.000445924	-0.767749	0.000227795	-0.250843	0.263834	0.554281	0.000100123	0.295829	0.18514	0.812734	4.51463e-05	1.06358	4.17672e-10	0.0449852	0.871208	erythrocyte membrane protein band 4.1 like 3 [Source:HGNC Symbol;Acc:HGNC:3380]
COBLL1	ENSG00000082438	5.38475	-0.670604	5.06631e-08	-0.292056	0.116043	-1.04915	1.7054e-08	0.0179222	0.897605	0.39647	0.0293084	-0.360626	0.0431139	0.688526	1.09433e-06	-0.652682	0.00101018	cordon-bleu WH2 repeat protein like 1 [Source:HGNC Symbol;Acc:HGNC:23571]
DLG3	ENSG00000082458	6.42556	-0.161136	0.0702756	-0.399138	0.00159236	0.0768654	0.585929	0.00384725	0.970104	-0.234154	0.0674672	0.241849	0.0521321	0.164983	0.104266	-0.157289	0.291196	discs large MAGUK scaffold protein 3 [Source:HGNC Symbol;Acc:HGNC:2902]
KCNK2	ENSG00000082482	3.74403	-0.876934	0.00414541	-1.35373	0.00172407	-0.400136	0.406847	-0.264136	0.401075	-0.740934	0.0937989	0.212662	0.654972	0.612798	0.0828578	-1.14107	0.0226153	potassium two pore domain channel subfamily K member 2 [Source:HGNC Symbol;Acc:HGNC:6277]
SERTAD4	ENSG00000082497	6.08541	0.126092	0.465815	0.12567	0.644821	0.126514	0.626715	-0.738716	2.40376e-06	-0.739138	0.000956601	-0.738294	0.00140599	-0.864808	2.64021e-06	-0.612624	0.0190177	SERTA domain containing 4 [Source:HGNC Symbol;Acc:HGNC:25236]
TRAF5	ENSG00000082512	5.36189	-0.228318	0.0426191	-0.103444	0.575977	-0.353193	0.0323462	0.912744	4.64889e-16	1.03762	3.41722e-10	0.78787	2.18495e-07	1.14106	1.488e-17	0.684426	0.000139231	TNF receptor associated factor 5 [Source:HGNC Symbol;Acc:HGNC:12035]
MRPL22	ENSG00000082515	4.60854	0.286668	0.000194977	0.258012	0.0268497	0.315324	0.00443567	0.0695965	0.384654	0.0409403	0.75598	0.0982527	0.39988	-0.217072	0.0145361	0.356265	0.00449747	mitochondrial ribosomal protein L22 [Source:HGNC Symbol;Acc:HGNC:14480]
GEMIN5	ENSG00000082516	5.20119	-0.105505	0.165298	-0.132009	0.250027	-0.0790022	0.500644	0.0695023	0.359041	0.0429991	0.729679	0.0960055	0.385938	0.175008	0.0388826	-0.0360031	0.792523	gem nuclear organelle associated protein 5 [Source:HGNC Symbol;Acc:HGNC:20043]
OPRK1	ENSG00000082556	0.828155	1.59669	7.16168e-06	1.20407	0.0250385	1.98931	6.23236e-05	-4.15562	2.82173e-23	-4.54824	2.72786e-18	-3.763	1.36916e-10	-5.75232	8.44624e-28	-2.55893	1.20475e-05	opioid receptor kappa 1 [Source:HGNC Symbol;Acc:HGNC:8154]
NFE2L1	ENSG00000082641	8.39116	0.0712283	0.500484	-0.308385	0.0320286	0.450841	0.00109314	0.159362	0.101654	-0.220251	0.128043	0.538975	5.57014e-05	0.088134	0.449247	0.230591	0.156672	nuclear factor, erythroid 2 like 1 [Source:HGNC Symbol;Acc:HGNC:7781]
SEMA5B	ENSG00000082684	2.00445	0.276797	0.116119	0.693769	0.00748116	-0.140174	0.617167	-1.24879	4.54814e-13	-0.831818	0.000490816	-1.66576	1.30465e-10	-1.52559	8.83965e-14	-0.971991	0.000468428	semaphorin 5B [Source:HGNC Symbol;Acc:HGNC:10737]
GSK3B	ENSG00000082701	6.59688	-0.216233	0.00190212	-0.3126	0.00206693	-0.119866	0.263654	-0.110798	0.113845	-0.207165	0.0417895	-0.0144306	0.901264	0.105435	0.198378	-0.327031	0.00381941	glycogen synthase kinase 3 beta [Source:HGNC Symbol;Acc:HGNC:4617]
ITGB5	ENSG00000082781	7.99998	-0.284399	0.0263705	-0.417491	0.0253119	-0.151307	0.451284	0.503443	4.86788e-05	0.370351	0.0501551	0.636535	0.000263016	0.787841	7.6142e-08	0.219044	0.313391	integrin subunit beta 5 [Source:HGNC Symbol;Acc:HGNC:6160]
ERC1	ENSG00000082805	6.30517	-0.343196	0.000230451	-0.0852492	0.585642	-0.601144	1.32862e-05	-0.347334	0.00014489	-0.0893872	0.555741	-0.605281	6.10674e-06	-0.00413794	0.971946	-0.690531	4.95897e-06	ELKS/RAB6-interacting/CAST family member 1 [Source:HGNC Symbol;Acc:HGNC:17072]
XPO1	ENSG00000082898	7.88828	-0.149901	0.0217117	-0.240424	0.011582	-0.0593786	0.570985	-0.379342	2.41917e-09	-0.469864	2.07452e-07	-0.288819	0.00170577	-0.22944	0.00196009	-0.529243	4.23494e-07	exportin 1 [Source:HGNC Symbol;Acc:HGNC:12825]
LINC01587	ENSG00000082929	-1.48082	-0.900606	0.00837682	-1.05538	0.026162	-0.745835	0.16473	-2.71566	3.17406e-14	-2.87043	4.84808e-10	-2.56089	1.28767e-06	-1.81505	4.13562e-06	-3.61626	1.20921e-09	long intergenic non-protein coding RNA 1587 [Source:HGNC Symbol;Acc:HGNC:13716]
RNF13	ENSG00000082996	6.08998	-0.142165	0.043903	-0.275189	0.00687275	-0.00914189	0.940657	0.0911623	0.196399	-0.0418613	0.720767	0.224186	0.022833	0.233328	0.00340951	-0.0510032	0.687141	ring finger protein 13 [Source:HGNC Symbol;Acc:HGNC:10057]
TRPM3	ENSG00000083067	-1.5902	-0.649934	0.00301344	-0.0457133	0.909128	-1.25415	0.000172238	-0.979586	5.32473e-06	-0.375366	0.253383	-1.58381	1.40172e-06	-0.329652	0.194665	-1.62952	6.40971e-06	transient receptor potential cation channel subfamily M member 3 [Source:HGNC Symbol;Acc:HGNC:17992]
PALB2	ENSG00000083093	4.42588	-0.235089	0.000870008	-0.359244	0.000460495	-0.110934	0.312121	-0.110813	0.119789	-0.234968	0.0218482	0.0133425	0.910041	0.124276	0.133026	-0.345902	0.00255356	partner and localizer of BRCA2 [Source:HGNC Symbol;Acc:HGNC:26144]
DOP1A	ENSG00000083097	4.65749	-0.849832	2.48096e-17	-0.795749	7.01658e-09	-0.903915	4.96303e-10	0.0261829	0.804713	0.0802657	0.61139	-0.0278999	0.860324	0.876015	1.30236e-14	-0.823649	1.25478e-07	DOP1 leucine zipper like protein A [Source:HGNC Symbol;Acc:HGNC:21194]
LYRM2	ENSG00000083099	5.50118	-0.201015	0.0217026	-0.291033	0.0232915	-0.110998	0.417069	-0.407535	1.53472e-06	-0.497553	4.17709e-05	-0.317517	0.0107879	-0.20652	0.0392541	-0.60855	1.38836e-05	LYR motif containing 2 [Source:HGNC Symbol;Acc:HGNC:25229]
BCKDHB	ENSG00000083123	4.54008	-0.489083	2.47713e-07	-0.414083	0.0026231	-0.564083	5.17839e-05	0.191065	0.0427133	0.266065	0.0598804	0.116064	0.418593	0.680147	6.7617e-10	-0.298018	0.0567312	branched chain keto acid dehydrogenase E1 subunit beta [Source:HGNC Symbol;Acc:HGNC:987]
KAT6A	ENSG00000083168	6.79537	-0.183302	0.160573	-0.331841	0.0796521	-0.0347623	0.872885	0.29368	0.0184904	0.145141	0.473556	0.44222	0.0123891	0.476982	0.000974429	0.110379	0.627621	lysine acetyltransferase 6A [Source:HGNC Symbol;Acc:HGNC:13013]
TUT7	ENSG00000083223	5.60357	-0.434791	2.02581e-08	-0.447612	5.91808e-05	-0.421969	0.000187856	-0.136571	0.0772162	-0.149392	0.202472	-0.123749	0.286776	0.29822	0.000756195	-0.571361	4.69803e-06	terminal uridylyl transferase 7 [Source:HGNC Symbol;Acc:HGNC:25817]
ULK2	ENSG00000083290	5.26263	0.136927	0.242251	0.0208856	0.92073	0.252968	0.128136	0.556801	3.87748e-07	0.44076	0.00734897	0.672842	1.1722e-05	0.419874	0.00105951	0.693727	0.000128719	unc-51 like autophagy activating kinase 2 [Source:HGNC Symbol;Acc:HGNC:13480]
GRHL2	ENSG00000083307	6.65535	0.202215	0.03207	-0.0945633	0.539666	0.498993	0.000157074	-0.0253597	0.805287	-0.322138	0.0162371	0.271418	0.0405403	-0.227574	0.0342549	0.176855	0.264818	grainyhead like transcription factor 2 [Source:HGNC Symbol;Acc:HGNC:2799]
TNPO1	ENSG00000083312	7.1005	-0.50294	3.82105e-11	-0.520855	1.41892e-06	-0.485024	1.10632e-05	0.16495	0.026632	0.147034	0.20139	0.182865	0.0916246	0.667889	4.89429e-14	-0.33799	0.00556543	transportin 1 [Source:HGNC Symbol;Acc:HGNC:6401]
[truncated: 23,359 more rows]

## Sheet: up-regulated HSF1high vs low
symbol	ensembl_id	logCPM	HSF1high vs HSF1low logFC	HSF1high vs HSF1low FDR	ER−/HSF1high vs ER−/HSF1low logFC	ER−/HSF1high vs ER−/HSF1low FDR	ER+/HSF1high vs ER+/HSF1low logFC	ER+/HSF1high vs ER+/HSF1low FDR	ER+ vs ER− logFC	ER+ vs ER− FDR	ER+/HSF1low vs ER−/HSF1low logFC	ER+/HSF1low vs ER−/HSF1low FDR	ER+/HSF1high vs ER−/HSF1high logFC	ER+/HSF1high vs ER−/HSF1high FDR	ER+/HSF1low vs ER−/HSF1high logFC	ER+/HSF1low vs ER−/HSF1high FDR	ER+/HSF1high vs ER−/HSF1low logFC	ER+/HSF1high vs ER−/HSF1low FDR	description
[truncated: 6,885 more rows]

[truncated: 3 more sheets: down-regulated HSF1high vs low, up-regulated ER+ vs -, down-regulated ER+ vs -]
